# Supplementary material for: Cluster‐Based Arithmetic Coding for Data Provenance Compression in Wireless Sensor Networks
Source: Hindawi journal article supplement (doi:10.1155/2018/9576978), 2018-01-01
Supplement: f1 [file 9576978.f1.zip]

Archive with 44 entries (36 files):
- 9576978.f1/
- 9576978.f1/simulation code/
- 9576978.f1/simulation code/arithmetic/
- 9576978.f1/simulation code/arithmetic/app.xml
- 9576978.f1/simulation code/arithmetic/log.txt
- 9576978.f1/simulation code/arithmetic/Makefile
- 9576978.f1/simulation code/arithmetic/meyer-short.txt
- 9576978.f1/simulation code/arithmetic/Network.h
- 9576978.f1/simulation code/arithmetic/NetworkAppC.nc
- 9576978.f1/simulation code/arithmetic/NetworkC.nc
- 9576978.f1/simulation code/arithmetic/simbuild/
- 9576978.f1/simulation code/arithmetic/simbuild/micaz/
- 9576978.f1/simulation code/arithmetic/simbuild/micaz/app.c
- 9576978.f1/simulation code/arithmetic/simbuild/micaz/c-support.o
- 9576978.f1/simulation code/arithmetic/simbuild/micaz/ident_flags.txt
- 9576978.f1/simulation code/arithmetic/simbuild/micaz/pytossim.o
- 9576978.f1/simulation code/arithmetic/simbuild/micaz/sim.o
- 9576978.f1/simulation code/arithmetic/simbuild/micaz/tossim.o
- 9576978.f1/simulation code/arithmetic/test.py
- 9576978.f1/simulation code/arithmetic/topo.txt
- 9576978.f1/simulation code/arithmetic/TOSSIM.py
- 9576978.f1/simulation code/arithmetic/TOSSIM.pyc
- 9576978.f1/simulation code/arithmetic/_TOSSIMmodule.so
- 9576978.f1/simulation code/clustera/
- 9576978.f1/simulation code/clustera/app.xml
- 9576978.f1/simulation code/clustera/log.txt
- 9576978.f1/simulation code/clustera/Makefile
- 9576978.f1/simulation code/clustera/meyer-short.txt
- 9576978.f1/simulation code/clustera/Network.h
- 9576978.f1/simulation code/clustera/NetworkAppC.nc
- 9576978.f1/simulation code/clustera/NetworkC.nc
- 9576978.f1/simulation code/clustera/simbuild/
- 9576978.f1/simulation code/clustera/simbuild/micaz/
- 9576978.f1/simulation code/clustera/simbuild/micaz/app.c
- 9576978.f1/simulation code/clustera/simbuild/micaz/c-support.o
- 9576978.f1/simulation code/clustera/simbuild/micaz/ident_flags.txt
- 9576978.f1/simulation code/clustera/simbuild/micaz/pytossim.o
- 9576978.f1/simulation code/clustera/simbuild/micaz/sim.o
- 9576978.f1/simulation code/clustera/simbuild/micaz/tossim.o
- 9576978.f1/simulation code/clustera/test.py
- 9576978.f1/simulation code/clustera/topo.txt
- 9576978.f1/simulation code/clustera/TOSSIM.py
- 9576978.f1/simulation code/clustera/TOSSIM.pyc
- 9576978.f1/simulation code/clustera/_TOSSIMmodule.so
