# Supplementary material for: Cluster‐Based Arithmetic Coding for Data Provenance Compression in Wireless Sensor Networks
Source: Hindawi journal article supplement (doi:10.1155/2018/9576978), 2018-01-01
Supplement: f1 [file 9576978.f1.zip › 9576978.f1/simulation code/arithmetic/app.xml]

<nesc xmlns="http://www.tinyos.net/nesC">
  <components>
    <component qname="NetworkAppC" loc="4:NetworkAppC.nc">
      <configuration/>
    </component>
    <component qname="MainC" loc="47:/opt/tinyos-2.1.2/tos/lib/tossim/MainC.nc">
      <configuration/>
    </component>
    <component qname="PlatformC" loc="40:/opt/tinyos-2.1.2/tos/platforms/mica/sim/PlatformC.nc">
      <documentation loc="1:/opt/tinyos-2.1.2/tos/platforms/micaz/sim/platform_hardware.h">
        <short>                                                                     &#10;  IMPORTANT: READ BEFORE DOWNLOADING, COPYING, INSTALLING OR USING.</short>
        <long>                                                                     &#10;  IMPORTANT: READ BEFORE DOWNLOADING, COPYING, INSTALLING OR USING.  By&#10;  downloading, copying, installing or using the software you agree to&#10;  this license.  If you do not agree to this license, do not download,&#10;  install, copy or use the software.&#10;&#10;  Copyright (c) 2004-2005 Crossbow Technology, Inc.&#10;  Copyright (c) 2002-2003 Intel Corporation.&#10;  Copyright (c) 2000-2003 The Regents of the University  of California.    &#10;  All rights reserved.&#10;&#10; Redistribution and use in source and binary forms, with or without&#10; modification, are permitted provided that the following conditions&#10; are met:&#10;&#10; - Redistributions of source code must retain the above copyright&#10;   notice, this list of conditions and the following disclaimer.&#10; - Redistributions in binary form must reproduce the above copyright&#10;   notice, this list of conditions and the following disclaimer in the&#10;   documentation and/or other materials provided with the&#10;   distribution.&#10; - Neither the name of the copyright holder nor the names of&#10;   its contributors may be used to endorse or promote products derived&#10;   from this software without specific prior written permission.&#10;&#10; THIS SOFTWARE IS PROVIDED BY THE COPYRIGHT HOLDERS AND CONTRIBUTORS&#10; &#34;AS IS&#34; AND ANY EXPRESS OR IMPLIED WARRANTIES, INCLUDING, BUT NOT&#10; LIMITED TO, THE IMPLIED WARRANTIES OF MERCHANTABILITY AND FITNESS&#10; FOR A PARTICULAR PURPOSE ARE DISCLAIMED.  IN NO EVENT SHALL&#10; THE COPYRIGHT HOLDER OR CONTRIBUTORS BE LIABLE FOR ANY DIRECT,&#10; INDIRECT, INCIDENTAL, SPECIAL, EXEMPLARY, OR CONSEQUENTIAL DAMAGES&#10; (INCLUDING, BUT NOT LIMITED TO, PROCUREMENT OF SUBSTITUTE GOODS OR&#10; SERVICES; LOSS OF USE, DATA, OR PROFITS; OR BUSINESS INTERRUPTION)&#10; HOWEVER CAUSED AND ON ANY THEORY OF LIABILITY, WHETHER IN CONTRACT,&#10; STRICT LIABILITY, OR TORT (INCLUDING NEGLIGENCE OR OTHERWISE)&#10; ARISING IN ANY WAY OUT OF THE USE OF THIS SOFTWARE, EVEN IF ADVISED&#10; OF THE POSSIBILITY OF SUCH DAMAGE.&#10;&#10;  @author Jason Hill, Philip Levis, Nelson Lee, David Gay&#10;  @author Alan Broad &#60;abroad@xbow.com>&#10;  @author Matt Miller &#60;mmiller@xbow.com>&#10;  @author Martin Turon &#60;mturon@xbow.com>&#10;&#10;  $Id: platform_hardware.h,v 1.6 2010-06-29 22:07:54 scipio Exp $&#10;</long>
      </documentation>
      <configuration/>
    </component>
    <component qname="PlatformP" loc="42:/opt/tinyos-2.1.2/tos/platforms/mica/PlatformP.nc" safe="">
      <documentation loc="1:/opt/tinyos-2.1.2/tos/platforms/micaz/sim/platform_hardware.h">
        <short>                                                                     &#10;  IMPORTANT: READ BEFORE DOWNLOADING, COPYING, INSTALLING OR USING.</short>
        <long>                                                                     &#10;  IMPORTANT: READ BEFORE DOWNLOADING, COPYING, INSTALLING OR USING.  By&#10;  downloading, copying, installing or using the software you agree to&#10;  this license.  If you do not agree to this license, do not download,&#10;  install, copy or use the software.&#10;&#10;  Copyright (c) 2004-2005 Crossbow Technology, Inc.&#10;  Copyright (c) 2002-2003 Intel Corporation.&#10;  Copyright (c) 2000-2003 The Regents of the University  of California.    &#10;  All rights reserved.&#10;&#10; Redistribution and use in source and binary forms, with or without&#10; modification, are permitted provided that the following conditions&#10; are met:&#10;&#10; - Redistributions of source code must retain the above copyright&#10;   notice, this list of conditions and the following disclaimer.&#10; - Redistributions in binary form must reproduce the above copyright&#10;   notice, this list of conditions and the following disclaimer in the&#10;   documentation and/or other materials provided with the&#10;   distribution.&#10; - Neither the name of the copyright holder nor the names of&#10;   its contributors may be used to endorse or promote products derived&#10;   from this software without specific prior written permission.&#10;&#10; THIS SOFTWARE IS PROVIDED BY THE COPYRIGHT HOLDERS AND CONTRIBUTORS&#10; &#34;AS IS&#34; AND ANY EXPRESS OR IMPLIED WARRANTIES, INCLUDING, BUT NOT&#10; LIMITED TO, THE IMPLIED WARRANTIES OF MERCHANTABILITY AND FITNESS&#10; FOR A PARTICULAR PURPOSE ARE DISCLAIMED.  IN NO EVENT SHALL&#10; THE COPYRIGHT HOLDER OR CONTRIBUTORS BE LIABLE FOR ANY DIRECT,&#10; INDIRECT, INCIDENTAL, SPECIAL, EXEMPLARY, OR CONSEQUENTIAL DAMAGES&#10; (INCLUDING, BUT NOT LIMITED TO, PROCUREMENT OF SUBSTITUTE GOODS OR&#10; SERVICES; LOSS OF USE, DATA, OR PROFITS; OR BUSINESS INTERRUPTION)&#10; HOWEVER CAUSED AND ON ANY THEORY OF LIABILITY, WHETHER IN CONTRACT,&#10; STRICT LIABILITY, OR TORT (INCLUDING NEGLIGENCE OR OTHERWISE)&#10; ARISING IN ANY WAY OUT OF THE USE OF THIS SOFTWARE, EVEN IF ADVISED&#10; OF THE POSSIBILITY OF SUCH DAMAGE.&#10;&#10;  @author Jason Hill, Philip Levis, Nelson Lee, David Gay&#10;  @author Alan Broad &#60;abroad@xbow.com>&#10;  @author Matt Miller &#60;mmiller@xbow.com>&#10;  @author Martin Turon &#60;mturon@xbow.com>&#10;&#10;  $Id: platform_hardware.h,v 1.6 2010-06-29 22:07:54 scipio Exp $&#10;</long>
      </documentation>
      <module/>
    </component>
    <component qname="MotePlatformC" loc="38:/opt/tinyos-2.1.2/tos/platforms/micaz/MotePlatformC.nc">
      <documentation loc="33:/opt/tinyos-2.1.2/tos/platforms/micaz/MotePlatformC.nc">
        <short>&#10; The porttion of a mica-family initialisation that is mote-specific.</short>
        <long>&#10; The porttion of a mica-family initialisation that is mote-specific.&#10; &#10; @author David Gay&#10;</long>
      </documentation>
      <configuration/>
    </component>
    <component qname="MotePlatformP" loc="41:/opt/tinyos-2.1.2/tos/platforms/micaz/MotePlatformP.nc" safe="">
      <documentation loc="35:/opt/tinyos-2.1.2/tos/platforms/micaz/MotePlatformP.nc">
        <short>&#10; The micaZ portion of a mica-family initialisation that is&#10; mote-specific.</short>
        <long>&#10; The micaZ portion of a mica-family initialisation that is&#10; mote-specific.&#10; &#10; @author David Gay&#10;</long>
      </documentation>
      <module/>
    </component>
    <component qname="HplAtm128GeneralIOC" loc="42:/opt/tinyos-2.1.2/tos/chips/atm128/pins/sim/HplAtm128GeneralIOC.nc">
      <documentation loc="36:/opt/tinyos-2.1.2/tos/chips/atm128/pins/sim/HplAtm128GeneralIOC.nc">
        <short>&#10; Provide GeneralIO interfaces for all of the ATmega128's pins.</short>
        <long>&#10; Provide GeneralIO interfaces for all of the ATmega128's pins.&#10;</long>
      </documentation>
      <configuration/>
    </component>
    <component qname="HplAtm128GeneralIOC.PortA" loc="40(HplAtm128GeneralIOC.PortA):/opt/tinyos-2.1.2/tos/chips/atm128/pins/HplAtm128GeneralIOPortP.nc">
      <documentation loc="34:/opt/tinyos-2.1.2/tos/chips/atm128/pins/HplAtm128GeneralIOPortP.nc">
        <short>&#10; Generic component to expose a full 8-bit port of GPIO pins.</short>
        <long>&#10; Generic component to expose a full 8-bit port of GPIO pins.&#10;&#10; @author Martin Turon &#60;mturon@xbow.com>&#10;</long>
      </documentation>
      <instance number="0">
        <component-ref qname="HplAtm128GeneralIOPortP"/>
        <arguments>
          <value cst="I:27">
            <type-int cname="unsigned char" unsigned="" size="I:1" alignment="I:1">
              <typename><typedef-ref name="uint8_t" ref="0x40218250"/></typename>
            </type-int>
          </value>
          <value cst="I:26">
            <type-int cname="unsigned char" unsigned="" size="I:1" alignment="I:1">
              <typename><typedef-ref name="uint8_t" ref="0x40218250"/></typename>
            </type-int>
          </value>
          <value cst="I:25">
            <type-int cname="unsigned char" unsigned="" size="I:1" alignment="I:1">
              <typename><typedef-ref name="uint8_t" ref="0x40218250"/></typename>
            </type-int>
          </value>
        </arguments>
      </instance>
      <configuration/>
    </component>
    <component qname="HplAtm128GeneralIOC.PortA.Bit0" loc="41(HplAtm128GeneralIOC.PortA.Bit0):/opt/tinyos-2.1.2/tos/chips/atm128/pins/sim/HplAtm128GeneralIOPinP.nc">
      <documentation loc="37:/opt/tinyos-2.1.2/tos/chips/atm128/pins/sim/HplAtm128GeneralIOPinP.nc">
        <short>&#10; Generic pin access for pins mapped into I/O space (for which the sbi, cbi&#10; instructions give atomic updates).</short>
        <long>&#10; Generic pin access for pins mapped into I/O space (for which the sbi, cbi&#10; instructions give atomic updates). This can be used for ports A-E.&#10;</long>
      </documentation>
      <instance number="0">
        <component-ref qname="HplAtm128GeneralIOPinP"/>
        <arguments>
          <value cst="U:">
            <type-int cname="unsigned char" unsigned="" size="I:1" alignment="I:1">
              <typename><typedef-ref name="uint8_t" ref="0x40218250"/></typename>
            </type-int>
          </value>
          <value cst="U:">
            <type-int cname="unsigned char" unsigned="" size="I:1" alignment="I:1">
              <typename><typedef-ref name="uint8_t" ref="0x40218250"/></typename>
            </type-int>
          </value>
          <value cst="U:">
            <type-int cname="unsigned char" unsigned="" size="I:1" alignment="I:1">
              <typename><typedef-ref name="uint8_t" ref="0x40218250"/></typename>
            </type-int>
          </value>
          <value cst="I:0">
            <type-int cname="int" size="I:4" alignment="I:4"></type-int>
          </value>
        </arguments>
      </instance>
      <module/>
    </component>
    <component qname="HplAtm128GeneralIOC.PortA.Bit1" loc="41(HplAtm128GeneralIOC.PortA.Bit1):/opt/tinyos-2.1.2/tos/chips/atm128/pins/sim/HplAtm128GeneralIOPinP.nc">
      <documentation loc="37:/opt/tinyos-2.1.2/tos/chips/atm128/pins/sim/HplAtm128GeneralIOPinP.nc">
        <short>&#10; Generic pin access for pins mapped into I/O space (for which the sbi, cbi&#10; instructions give atomic updates).</short>
        <long>&#10; Generic pin access for pins mapped into I/O space (for which the sbi, cbi&#10; instructions give atomic updates). This can be used for ports A-E.&#10;</long>
      </documentation>
      <instance number="1">
        <component-ref qname="HplAtm128GeneralIOPinP"/>
        <arguments>
          <value cst="U:">
            <type-int cname="unsigned char" unsigned="" size="I:1" alignment="I:1">
              <typename><typedef-ref name="uint8_t" ref="0x40218250"/></typename>
            </type-int>
          </value>
          <value cst="U:">
            <type-int cname="unsigned char" unsigned="" size="I:1" alignment="I:1">
              <typename><typedef-ref name="uint8_t" ref="0x40218250"/></typename>
            </type-int>
          </value>
          <value cst="U:">
            <type-int cname="unsigned char" unsigned="" size="I:1" alignment="I:1">
              <typename><typedef-ref name="uint8_t" ref="0x40218250"/></typename>
            </type-int>
          </value>
          <value cst="I:1">
            <type-int cname="int" size="I:4" alignment="I:4"></type-int>
          </value>
        </arguments>
      </instance>
      <module/>
    </component>
    <component qname="HplAtm128GeneralIOC.PortA.Bit2" loc="41(HplAtm128GeneralIOC.PortA.Bit2):/opt/tinyos-2.1.2/tos/chips/atm128/pins/sim/HplAtm128GeneralIOPinP.nc">
      <documentation loc="37:/opt/tinyos-2.1.2/tos/chips/atm128/pins/sim/HplAtm128GeneralIOPinP.nc">
        <short>&#10; Generic pin access for pins mapped into I/O space (for which the sbi, cbi&#10; instructions give atomic updates).</short>
        <long>&#10; Generic pin access for pins mapped into I/O space (for which the sbi, cbi&#10; instructions give atomic updates). This can be used for ports A-E.&#10;</long>
      </documentation>
      <instance number="2">
        <component-ref qname="HplAtm128GeneralIOPinP"/>
        <arguments>
          <value cst="U:">
            <type-int cname="unsigned char" unsigned="" size="I:1" alignment="I:1">
              <typename><typedef-ref name="uint8_t" ref="0x40218250"/></typename>
            </type-int>
          </value>
          <value cst="U:">
            <type-int cname="unsigned char" unsigned="" size="I:1" alignment="I:1">
              <typename><typedef-ref name="uint8_t" ref="0x40218250"/></typename>
            </type-int>
          </value>
          <value cst="U:">
            <type-int cname="unsigned char" unsigned="" size="I:1" alignment="I:1">
              <typename><typedef-ref name="uint8_t" ref="0x40218250"/></typename>
            </type-int>
          </value>
          <value cst="I:2">
            <type-int cname="int" size="I:4" alignment="I:4"></type-int>
          </value>
        </arguments>
      </instance>
      <module/>
    </component>
    <component qname="HplAtm128GeneralIOC.PortA.Bit3" loc="41(HplAtm128GeneralIOC.PortA.Bit3):/opt/tinyos-2.1.2/tos/chips/atm128/pins/sim/HplAtm128GeneralIOPinP.nc">
      <documentation loc="37:/opt/tinyos-2.1.2/tos/chips/atm128/pins/sim/HplAtm128GeneralIOPinP.nc">
        <short>&#10; Generic pin access for pins mapped into I/O space (for which the sbi, cbi&#10; instructions give atomic updates).</short>
        <long>&#10; Generic pin access for pins mapped into I/O space (for which the sbi, cbi&#10; instructions give atomic updates). This can be used for ports A-E.&#10;</long>
      </documentation>
      <instance number="3">
        <component-ref qname="HplAtm128GeneralIOPinP"/>
        <arguments>
          <value cst="U:">
            <type-int cname="unsigned char" unsigned="" size="I:1" alignment="I:1">
              <typename><typedef-ref name="uint8_t" ref="0x40218250"/></typename>
            </type-int>
          </value>
          <value cst="U:">
            <type-int cname="unsigned char" unsigned="" size="I:1" alignment="I:1">
              <typename><typedef-ref name="uint8_t" ref="0x40218250"/></typename>
            </type-int>
          </value>
          <value cst="U:">
            <type-int cname="unsigned char" unsigned="" size="I:1" alignment="I:1">
              <typename><typedef-ref name="uint8_t" ref="0x40218250"/></typename>
            </type-int>
          </value>
          <value cst="I:3">
            <type-int cname="int" size="I:4" alignment="I:4"></type-int>
          </value>
        </arguments>
      </instance>
      <module/>
    </component>
    <component qname="HplAtm128GeneralIOC.PortA.Bit4" loc="41(HplAtm128GeneralIOC.PortA.Bit4):/opt/tinyos-2.1.2/tos/chips/atm128/pins/sim/HplAtm128GeneralIOPinP.nc">
      <documentation loc="37:/opt/tinyos-2.1.2/tos/chips/atm128/pins/sim/HplAtm128GeneralIOPinP.nc">
        <short>&#10; Generic pin access for pins mapped into I/O space (for which the sbi, cbi&#10; instructions give atomic updates).</short>
        <long>&#10; Generic pin access for pins mapped into I/O space (for which the sbi, cbi&#10; instructions give atomic updates). This can be used for ports A-E.&#10;</long>
      </documentation>
      <instance number="4">
        <component-ref qname="HplAtm128GeneralIOPinP"/>
        <arguments>
          <value cst="U:">
            <type-int cname="unsigned char" unsigned="" size="I:1" alignment="I:1">
              <typename><typedef-ref name="uint8_t" ref="0x40218250"/></typename>
            </type-int>
          </value>
          <value cst="U:">
            <type-int cname="unsigned char" unsigned="" size="I:1" alignment="I:1">
              <typename><typedef-ref name="uint8_t" ref="0x40218250"/></typename>
            </type-int>
          </value>
          <value cst="U:">
            <type-int cname="unsigned char" unsigned="" size="I:1" alignment="I:1">
              <typename><typedef-ref name="uint8_t" ref="0x40218250"/></typename>
            </type-int>
          </value>
          <value cst="I:4">
            <type-int cname="int" size="I:4" alignment="I:4"></type-int>
          </value>
        </arguments>
      </instance>
      <module/>
    </component>
    <component qname="HplAtm128GeneralIOC.PortA.Bit5" loc="41(HplAtm128GeneralIOC.PortA.Bit5):/opt/tinyos-2.1.2/tos/chips/atm128/pins/sim/HplAtm128GeneralIOPinP.nc">
      <documentation loc="37:/opt/tinyos-2.1.2/tos/chips/atm128/pins/sim/HplAtm128GeneralIOPinP.nc">
        <short>&#10; Generic pin access for pins mapped into I/O space (for which the sbi, cbi&#10; instructions give atomic updates).</short>
        <long>&#10; Generic pin access for pins mapped into I/O space (for which the sbi, cbi&#10; instructions give atomic updates). This can be used for ports A-E.&#10;</long>
      </documentation>
      <instance number="5">
        <component-ref qname="HplAtm128GeneralIOPinP"/>
        <arguments>
          <value cst="U:">
            <type-int cname="unsigned char" unsigned="" size="I:1" alignment="I:1">
              <typename><typedef-ref name="uint8_t" ref="0x40218250"/></typename>
            </type-int>
          </value>
          <value cst="U:">
            <type-int cname="unsigned char" unsigned="" size="I:1" alignment="I:1">
              <typename><typedef-ref name="uint8_t" ref="0x40218250"/></typename>
            </type-int>
          </value>
          <value cst="U:">
            <type-int cname="unsigned char" unsigned="" size="I:1" alignment="I:1">
              <typename><typedef-ref name="uint8_t" ref="0x40218250"/></typename>
            </type-int>
          </value>
          <value cst="I:5">
            <type-int cname="int" size="I:4" alignment="I:4"></type-int>
          </value>
        </arguments>
      </instance>
      <module/>
    </component>
    <component qname="HplAtm128GeneralIOC.PortA.Bit6" loc="41(HplAtm128GeneralIOC.PortA.Bit6):/opt/tinyos-2.1.2/tos/chips/atm128/pins/sim/HplAtm128GeneralIOPinP.nc">
      <documentation loc="37:/opt/tinyos-2.1.2/tos/chips/atm128/pins/sim/HplAtm128GeneralIOPinP.nc">
        <short>&#10; Generic pin access for pins mapped into I/O space (for which the sbi, cbi&#10; instructions give atomic updates).</short>
        <long>&#10; Generic pin access for pins mapped into I/O space (for which the sbi, cbi&#10; instructions give atomic updates). This can be used for ports A-E.&#10;</long>
      </documentation>
      <instance number="6">
        <component-ref qname="HplAtm128GeneralIOPinP"/>
        <arguments>
          <value cst="U:">
            <type-int cname="unsigned char" unsigned="" size="I:1" alignment="I:1">
              <typename><typedef-ref name="uint8_t" ref="0x40218250"/></typename>
            </type-int>
          </value>
          <value cst="U:">
            <type-int cname="unsigned char" unsigned="" size="I:1" alignment="I:1">
              <typename><typedef-ref name="uint8_t" ref="0x40218250"/></typename>
            </type-int>
          </value>
          <value cst="U:">
            <type-int cname="unsigned char" unsigned="" size="I:1" alignment="I:1">
              <typename><typedef-ref name="uint8_t" ref="0x40218250"/></typename>
            </type-int>
          </value>
          <value cst="I:6">
            <type-int cname="int" size="I:4" alignment="I:4"></type-int>
          </value>
        </arguments>
      </instance>
      <module/>
    </component>
    <component qname="HplAtm128GeneralIOC.PortA.Bit7" loc="41(HplAtm128GeneralIOC.PortA.Bit7):/opt/tinyos-2.1.2/tos/chips/atm128/pins/sim/HplAtm128GeneralIOPinP.nc">
      <documentation loc="37:/opt/tinyos-2.1.2/tos/chips/atm128/pins/sim/HplAtm128GeneralIOPinP.nc">
        <short>&#10; Generic pin access for pins mapped into I/O space (for which the sbi, cbi&#10; instructions give atomic updates).</short>
        <long>&#10; Generic pin access for pins mapped into I/O space (for which the sbi, cbi&#10; instructions give atomic updates). This can be used for ports A-E.&#10;</long>
      </documentation>
      <instance number="7">
        <component-ref qname="HplAtm128GeneralIOPinP"/>
        <arguments>
          <value cst="U:">
            <type-int cname="unsigned char" unsigned="" size="I:1" alignment="I:1">
              <typename><typedef-ref name="uint8_t" ref="0x40218250"/></typename>
            </type-int>
          </value>
          <value cst="U:">
            <type-int cname="unsigned char" unsigned="" size="I:1" alignment="I:1">
              <typename><typedef-ref name="uint8_t" ref="0x40218250"/></typename>
            </type-int>
          </value>
          <value cst="U:">
            <type-int cname="unsigned char" unsigned="" size="I:1" alignment="I:1">
              <typename><typedef-ref name="uint8_t" ref="0x40218250"/></typename>
            </type-int>
          </value>
          <value cst="I:7">
            <type-int cname="int" size="I:4" alignment="I:4"></type-int>
          </value>
        </arguments>
      </instance>
      <module/>
    </component>
    <component qname="HplAtm128GeneralIOC.PortB" loc="40(HplAtm128GeneralIOC.PortB):/opt/tinyos-2.1.2/tos/chips/atm128/pins/HplAtm128GeneralIOPortP.nc">
      <documentation loc="34:/opt/tinyos-2.1.2/tos/chips/atm128/pins/HplAtm128GeneralIOPortP.nc">
        <short>&#10; Generic component to expose a full 8-bit port of GPIO pins.</short>
        <long>&#10; Generic component to expose a full 8-bit port of GPIO pins.&#10;&#10; @author Martin Turon &#60;mturon@xbow.com>&#10;</long>
      </documentation>
      <instance number="1">
        <component-ref qname="HplAtm128GeneralIOPortP"/>
        <arguments>
          <value cst="I:24">
            <type-int cname="unsigned char" unsigned="" size="I:1" alignment="I:1">
              <typename><typedef-ref name="uint8_t" ref="0x40218250"/></typename>
            </type-int>
          </value>
          <value cst="I:23">
            <type-int cname="unsigned char" unsigned="" size="I:1" alignment="I:1">
              <typename><typedef-ref name="uint8_t" ref="0x40218250"/></typename>
            </type-int>
          </value>
          <value cst="I:22">
            <type-int cname="unsigned char" unsigned="" size="I:1" alignment="I:1">
              <typename><typedef-ref name="uint8_t" ref="0x40218250"/></typename>
            </type-int>
          </value>
        </arguments>
      </instance>
      <configuration/>
    </component>
    <component qname="HplAtm128GeneralIOC.PortB.Bit0" loc="41(HplAtm128GeneralIOC.PortB.Bit0):/opt/tinyos-2.1.2/tos/chips/atm128/pins/sim/HplAtm128GeneralIOPinP.nc">
      <documentation loc="37:/opt/tinyos-2.1.2/tos/chips/atm128/pins/sim/HplAtm128GeneralIOPinP.nc">
        <short>&#10; Generic pin access for pins mapped into I/O space (for which the sbi, cbi&#10; instructions give atomic updates).</short>
        <long>&#10; Generic pin access for pins mapped into I/O space (for which the sbi, cbi&#10; instructions give atomic updates). This can be used for ports A-E.&#10;</long>
      </documentation>
      <instance number="8">
        <component-ref qname="HplAtm128GeneralIOPinP"/>
        <arguments>
          <value cst="U:">
            <type-int cname="unsigned char" unsigned="" size="I:1" alignment="I:1">
              <typename><typedef-ref name="uint8_t" ref="0x40218250"/></typename>
            </type-int>
          </value>
          <value cst="U:">
            <type-int cname="unsigned char" unsigned="" size="I:1" alignment="I:1">
              <typename><typedef-ref name="uint8_t" ref="0x40218250"/></typename>
            </type-int>
          </value>
          <value cst="U:">
            <type-int cname="unsigned char" unsigned="" size="I:1" alignment="I:1">
              <typename><typedef-ref name="uint8_t" ref="0x40218250"/></typename>
            </type-int>
          </value>
          <value cst="I:0">
            <type-int cname="int" size="I:4" alignment="I:4"></type-int>
          </value>
        </arguments>
      </instance>
      <module/>
    </component>
    <component qname="HplAtm128GeneralIOC.PortB.Bit1" loc="41(HplAtm128GeneralIOC.PortB.Bit1):/opt/tinyos-2.1.2/tos/chips/atm128/pins/sim/HplAtm128GeneralIOPinP.nc">
      <documentation loc="37:/opt/tinyos-2.1.2/tos/chips/atm128/pins/sim/HplAtm128GeneralIOPinP.nc">
        <short>&#10; Generic pin access for pins mapped into I/O space (for which the sbi, cbi&#10; instructions give atomic updates).</short>
        <long>&#10; Generic pin access for pins mapped into I/O space (for which the sbi, cbi&#10; instructions give atomic updates). This can be used for ports A-E.&#10;</long>
      </documentation>
      <instance number="9">
        <component-ref qname="HplAtm128GeneralIOPinP"/>
        <arguments>
          <value cst="U:">
            <type-int cname="unsigned char" unsigned="" size="I:1" alignment="I:1">
              <typename><typedef-ref name="uint8_t" ref="0x40218250"/></typename>
            </type-int>
          </value>
          <value cst="U:">
            <type-int cname="unsigned char" unsigned="" size="I:1" alignment="I:1">
              <typename><typedef-ref name="uint8_t" ref="0x40218250"/></typename>
            </type-int>
          </value>
          <value cst="U:">
            <type-int cname="unsigned char" unsigned="" size="I:1" alignment="I:1">
              <typename><typedef-ref name="uint8_t" ref="0x40218250"/></typename>
            </type-int>
          </value>
          <value cst="I:1">
            <type-int cname="int" size="I:4" alignment="I:4"></type-int>
          </value>
        </arguments>
      </instance>
      <module/>
    </component>
    <component qname="HplAtm128GeneralIOC.PortB.Bit2" loc="41(HplAtm128GeneralIOC.PortB.Bit2):/opt/tinyos-2.1.2/tos/chips/atm128/pins/sim/HplAtm128GeneralIOPinP.nc">
      <documentation loc="37:/opt/tinyos-2.1.2/tos/chips/atm128/pins/sim/HplAtm128GeneralIOPinP.nc">
        <short>&#10; Generic pin access for pins mapped into I/O space (for which the sbi, cbi&#10; instructions give atomic updates).</short>
        <long>&#10; Generic pin access for pins mapped into I/O space (for which the sbi, cbi&#10; instructions give atomic updates). This can be used for ports A-E.&#10;</long>
      </documentation>
      <instance number="10">
        <component-ref qname="HplAtm128GeneralIOPinP"/>
        <arguments>
          <value cst="U:">
            <type-int cname="unsigned char" unsigned="" size="I:1" alignment="I:1">
              <typename><typedef-ref name="uint8_t" ref="0x40218250"/></typename>
            </type-int>
          </value>
          <value cst="U:">
            <type-int cname="unsigned char" unsigned="" size="I:1" alignment="I:1">
              <typename><typedef-ref name="uint8_t" ref="0x40218250"/></typename>
            </type-int>
          </value>
          <value cst="U:">
            <type-int cname="unsigned char" unsigned="" size="I:1" alignment="I:1">
              <typename><typedef-ref name="uint8_t" ref="0x40218250"/></typename>
            </type-int>
          </value>
          <value cst="I:2">
            <type-int cname="int" size="I:4" alignment="I:4"></type-int>
          </value>
        </arguments>
      </instance>
      <module/>
    </component>
    <component qname="HplAtm128GeneralIOC.PortB.Bit3" loc="41(HplAtm128GeneralIOC.PortB.Bit3):/opt/tinyos-2.1.2/tos/chips/atm128/pins/sim/HplAtm128GeneralIOPinP.nc">
      <documentation loc="37:/opt/tinyos-2.1.2/tos/chips/atm128/pins/sim/HplAtm128GeneralIOPinP.nc">
        <short>&#10; Generic pin access for pins mapped into I/O space (for which the sbi, cbi&#10; instructions give atomic updates).</short>
        <long>&#10; Generic pin access for pins mapped into I/O space (for which the sbi, cbi&#10; instructions give atomic updates). This can be used for ports A-E.&#10;</long>
      </documentation>
      <instance number="11">
        <component-ref qname="HplAtm128GeneralIOPinP"/>
        <arguments>
          <value cst="U:">
            <type-int cname="unsigned char" unsigned="" size="I:1" alignment="I:1">
              <typename><typedef-ref name="uint8_t" ref="0x40218250"/></typename>
            </type-int>
          </value>
          <value cst="U:">
            <type-int cname="unsigned char" unsigned="" size="I:1" alignment="I:1">
              <typename><typedef-ref name="uint8_t" ref="0x40218250"/></typename>
            </type-int>
          </value>
          <value cst="U:">
            <type-int cname="unsigned char" unsigned="" size="I:1" alignment="I:1">
              <typename><typedef-ref name="uint8_t" ref="0x40218250"/></typename>
            </type-int>
          </value>
          <value cst="I:3">
            <type-int cname="int" size="I:4" alignment="I:4"></type-int>
          </value>
        </arguments>
      </instance>
      <module/>
    </component>
    <component qname="HplAtm128GeneralIOC.PortB.Bit4" loc="41(HplAtm128GeneralIOC.PortB.Bit4):/opt/tinyos-2.1.2/tos/chips/atm128/pins/sim/HplAtm128GeneralIOPinP.nc">
      <documentation loc="37:/opt/tinyos-2.1.2/tos/chips/atm128/pins/sim/HplAtm128GeneralIOPinP.nc">
        <short>&#10; Generic pin access for pins mapped into I/O space (for which the sbi, cbi&#10; instructions give atomic updates).</short>
        <long>&#10; Generic pin access for pins mapped into I/O space (for which the sbi, cbi&#10; instructions give atomic updates). This can be used for ports A-E.&#10;</long>
      </documentation>
      <instance number="12">
        <component-ref qname="HplAtm128GeneralIOPinP"/>
        <arguments>
          <value cst="U:">
            <type-int cname="unsigned char" unsigned="" size="I:1" alignment="I:1">
              <typename><typedef-ref name="uint8_t" ref="0x40218250"/></typename>
            </type-int>
          </value>
          <value cst="U:">
            <type-int cname="unsigned char" unsigned="" size="I:1" alignment="I:1">
              <typename><typedef-ref name="uint8_t" ref="0x40218250"/></typename>
            </type-int>
          </value>
          <value cst="U:">
            <type-int cname="unsigned char" unsigned="" size="I:1" alignment="I:1">
              <typename><typedef-ref name="uint8_t" ref="0x40218250"/></typename>
            </type-int>
          </value>
          <value cst="I:4">
            <type-int cname="int" size="I:4" alignment="I:4"></type-int>
          </value>
        </arguments>
      </instance>
      <module/>
    </component>
    <component qname="HplAtm128GeneralIOC.PortB.Bit5" loc="41(HplAtm128GeneralIOC.PortB.Bit5):/opt/tinyos-2.1.2/tos/chips/atm128/pins/sim/HplAtm128GeneralIOPinP.nc">
      <documentation loc="37:/opt/tinyos-2.1.2/tos/chips/atm128/pins/sim/HplAtm128GeneralIOPinP.nc">
        <short>&#10; Generic pin access for pins mapped into I/O space (for which the sbi, cbi&#10; instructions give atomic updates).</short>
        <long>&#10; Generic pin access for pins mapped into I/O space (for which the sbi, cbi&#10; instructions give atomic updates). This can be used for ports A-E.&#10;</long>
      </documentation>
      <instance number="13">
        <component-ref qname="HplAtm128GeneralIOPinP"/>
        <arguments>
          <value cst="U:">
            <type-int cname="unsigned char" unsigned="" size="I:1" alignment="I:1">
              <typename><typedef-ref name="uint8_t" ref="0x40218250"/></typename>
            </type-int>
          </value>
          <value cst="U:">
            <type-int cname="unsigned char" unsigned="" size="I:1" alignment="I:1">
              <typename><typedef-ref name="uint8_t" ref="0x40218250"/></typename>
            </type-int>
          </value>
          <value cst="U:">
            <type-int cname="unsigned char" unsigned="" size="I:1" alignment="I:1">
              <typename><typedef-ref name="uint8_t" ref="0x40218250"/></typename>
            </type-int>
          </value>
          <value cst="I:5">
            <type-int cname="int" size="I:4" alignment="I:4"></type-int>
          </value>
        </arguments>
      </instance>
      <module/>
    </component>
    <component qname="HplAtm128GeneralIOC.PortB.Bit6" loc="41(HplAtm128GeneralIOC.PortB.Bit6):/opt/tinyos-2.1.2/tos/chips/atm128/pins/sim/HplAtm128GeneralIOPinP.nc">
      <documentation loc="37:/opt/tinyos-2.1.2/tos/chips/atm128/pins/sim/HplAtm128GeneralIOPinP.nc">
        <short>&#10; Generic pin access for pins mapped into I/O space (for which the sbi, cbi&#10; instructions give atomic updates).</short>
        <long>&#10; Generic pin access for pins mapped into I/O space (for which the sbi, cbi&#10; instructions give atomic updates). This can be used for ports A-E.&#10;</long>
      </documentation>
      <instance number="14">
        <component-ref qname="HplAtm128GeneralIOPinP"/>
        <arguments>
          <value cst="U:">
            <type-int cname="unsigned char" unsigned="" size="I:1" alignment="I:1">
              <typename><typedef-ref name="uint8_t" ref="0x40218250"/></typename>
            </type-int>
          </value>
          <value cst="U:">
            <type-int cname="unsigned char" unsigned="" size="I:1" alignment="I:1">
              <typename><typedef-ref name="uint8_t" ref="0x40218250"/></typename>
            </type-int>
          </value>
          <value cst="U:">
            <type-int cname="unsigned char" unsigned="" size="I:1" alignment="I:1">
              <typename><typedef-ref name="uint8_t" ref="0x40218250"/></typename>
            </type-int>
          </value>
          <value cst="I:6">
            <type-int cname="int" size="I:4" alignment="I:4"></type-int>
          </value>
        </arguments>
      </instance>
      <module/>
    </component>
    <component qname="HplAtm128GeneralIOC.PortB.Bit7" loc="41(HplAtm128GeneralIOC.PortB.Bit7):/opt/tinyos-2.1.2/tos/chips/atm128/pins/sim/HplAtm128GeneralIOPinP.nc">
      <documentation loc="37:/opt/tinyos-2.1.2/tos/chips/atm128/pins/sim/HplAtm128GeneralIOPinP.nc">
        <short>&#10; Generic pin access for pins mapped into I/O space (for which the sbi, cbi&#10; instructions give atomic updates).</short>
        <long>&#10; Generic pin access for pins mapped into I/O space (for which the sbi, cbi&#10; instructions give atomic updates). This can be used for ports A-E.&#10;</long>
      </documentation>
      <instance number="15">
        <component-ref qname="HplAtm128GeneralIOPinP"/>
        <arguments>
          <value cst="U:">
            <type-int cname="unsigned char" unsigned="" size="I:1" alignment="I:1">
              <typename><typedef-ref name="uint8_t" ref="0x40218250"/></typename>
            </type-int>
          </value>
          <value cst="U:">
            <type-int cname="unsigned char" unsigned="" size="I:1" alignment="I:1">
              <typename><typedef-ref name="uint8_t" ref="0x40218250"/></typename>
            </type-int>
          </value>
          <value cst="U:">
            <type-int cname="unsigned char" unsigned="" size="I:1" alignment="I:1">
              <typename><typedef-ref name="uint8_t" ref="0x40218250"/></typename>
            </type-int>
          </value>
          <value cst="I:7">
            <type-int cname="int" size="I:4" alignment="I:4"></type-int>
          </value>
        </arguments>
      </instance>
      <module/>
    </component>
    <component qname="HplAtm128GeneralIOC.PortC" loc="40(HplAtm128GeneralIOC.PortC):/opt/tinyos-2.1.2/tos/chips/atm128/pins/HplAtm128GeneralIOPortP.nc">
      <documentation loc="34:/opt/tinyos-2.1.2/tos/chips/atm128/pins/HplAtm128GeneralIOPortP.nc">
        <short>&#10; Generic component to expose a full 8-bit port of GPIO pins.</short>
        <long>&#10; Generic component to expose a full 8-bit port of GPIO pins.&#10;&#10; @author Martin Turon &#60;mturon@xbow.com>&#10;</long>
      </documentation>
      <instance number="2">
        <component-ref qname="HplAtm128GeneralIOPortP"/>
        <arguments>
          <value cst="I:21">
            <type-int cname="unsigned char" unsigned="" size="I:1" alignment="I:1">
              <typename><typedef-ref name="uint8_t" ref="0x40218250"/></typename>
            </type-int>
          </value>
          <value cst="I:20">
            <type-int cname="unsigned char" unsigned="" size="I:1" alignment="I:1">
              <typename><typedef-ref name="uint8_t" ref="0x40218250"/></typename>
            </type-int>
          </value>
          <value cst="I:19">
            <type-int cname="unsigned char" unsigned="" size="I:1" alignment="I:1">
              <typename><typedef-ref name="uint8_t" ref="0x40218250"/></typename>
            </type-int>
          </value>
        </arguments>
      </instance>
      <configuration/>
    </component>
    <component qname="HplAtm128GeneralIOC.PortC.Bit0" loc="41(HplAtm128GeneralIOC.PortC.Bit0):/opt/tinyos-2.1.2/tos/chips/atm128/pins/sim/HplAtm128GeneralIOPinP.nc">
      <documentation loc="37:/opt/tinyos-2.1.2/tos/chips/atm128/pins/sim/HplAtm128GeneralIOPinP.nc">
        <short>&#10; Generic pin access for pins mapped into I/O space (for which the sbi, cbi&#10; instructions give atomic updates).</short>
        <long>&#10; Generic pin access for pins mapped into I/O space (for which the sbi, cbi&#10; instructions give atomic updates). This can be used for ports A-E.&#10;</long>
      </documentation>
      <instance number="16">
        <component-ref qname="HplAtm128GeneralIOPinP"/>
        <arguments>
          <value cst="U:">
            <type-int cname="unsigned char" unsigned="" size="I:1" alignment="I:1">
              <typename><typedef-ref name="uint8_t" ref="0x40218250"/></typename>
            </type-int>
          </value>
          <value cst="U:">
            <type-int cname="unsigned char" unsigned="" size="I:1" alignment="I:1">
              <typename><typedef-ref name="uint8_t" ref="0x40218250"/></typename>
            </type-int>
          </value>
          <value cst="U:">
            <type-int cname="unsigned char" unsigned="" size="I:1" alignment="I:1">
              <typename><typedef-ref name="uint8_t" ref="0x40218250"/></typename>
            </type-int>
          </value>
          <value cst="I:0">
            <type-int cname="int" size="I:4" alignment="I:4"></type-int>
          </value>
        </arguments>
      </instance>
      <module/>
    </component>
    <component qname="HplAtm128GeneralIOC.PortC.Bit1" loc="41(HplAtm128GeneralIOC.PortC.Bit1):/opt/tinyos-2.1.2/tos/chips/atm128/pins/sim/HplAtm128GeneralIOPinP.nc">
      <documentation loc="37:/opt/tinyos-2.1.2/tos/chips/atm128/pins/sim/HplAtm128GeneralIOPinP.nc">
        <short>&#10; Generic pin access for pins mapped into I/O space (for which the sbi, cbi&#10; instructions give atomic updates).</short>
        <long>&#10; Generic pin access for pins mapped into I/O space (for which the sbi, cbi&#10; instructions give atomic updates). This can be used for ports A-E.&#10;</long>
      </documentation>
      <instance number="17">
        <component-ref qname="HplAtm128GeneralIOPinP"/>
        <arguments>
          <value cst="U:">
            <type-int cname="unsigned char" unsigned="" size="I:1" alignment="I:1">
              <typename><typedef-ref name="uint8_t" ref="0x40218250"/></typename>
            </type-int>
          </value>
          <value cst="U:">
            <type-int cname="unsigned char" unsigned="" size="I:1" alignment="I:1">
              <typename><typedef-ref name="uint8_t" ref="0x40218250"/></typename>
            </type-int>
          </value>
          <value cst="U:">
            <type-int cname="unsigned char" unsigned="" size="I:1" alignment="I:1">
              <typename><typedef-ref name="uint8_t" ref="0x40218250"/></typename>
            </type-int>
          </value>
          <value cst="I:1">
            <type-int cname="int" size="I:4" alignment="I:4"></type-int>
          </value>
        </arguments>
      </instance>
      <module/>
    </component>
    <component qname="HplAtm128GeneralIOC.PortC.Bit2" loc="41(HplAtm128GeneralIOC.PortC.Bit2):/opt/tinyos-2.1.2/tos/chips/atm128/pins/sim/HplAtm128GeneralIOPinP.nc">
      <documentation loc="37:/opt/tinyos-2.1.2/tos/chips/atm128/pins/sim/HplAtm128GeneralIOPinP.nc">
        <short>&#10; Generic pin access for pins mapped into I/O space (for which the sbi, cbi&#10; instructions give atomic updates).</short>
        <long>&#10; Generic pin access for pins mapped into I/O space (for which the sbi, cbi&#10; instructions give atomic updates). This can be used for ports A-E.&#10;</long>
      </documentation>
      <instance number="18">
        <component-ref qname="HplAtm128GeneralIOPinP"/>
        <arguments>
          <value cst="U:">
            <type-int cname="unsigned char" unsigned="" size="I:1" alignment="I:1">
              <typename><typedef-ref name="uint8_t" ref="0x40218250"/></typename>
            </type-int>
          </value>
          <value cst="U:">
            <type-int cname="unsigned char" unsigned="" size="I:1" alignment="I:1">
              <typename><typedef-ref name="uint8_t" ref="0x40218250"/></typename>
            </type-int>
          </value>
          <value cst="U:">
            <type-int cname="unsigned char" unsigned="" size="I:1" alignment="I:1">
              <typename><typedef-ref name="uint8_t" ref="0x40218250"/></typename>
            </type-int>
          </value>
          <value cst="I:2">
            <type-int cname="int" size="I:4" alignment="I:4"></type-int>
          </value>
        </arguments>
      </instance>
      <module/>
    </component>
    <component qname="HplAtm128GeneralIOC.PortC.Bit3" loc="41(HplAtm128GeneralIOC.PortC.Bit3):/opt/tinyos-2.1.2/tos/chips/atm128/pins/sim/HplAtm128GeneralIOPinP.nc">
      <documentation loc="37:/opt/tinyos-2.1.2/tos/chips/atm128/pins/sim/HplAtm128GeneralIOPinP.nc">
        <short>&#10; Generic pin access for pins mapped into I/O space (for which the sbi, cbi&#10; instructions give atomic updates).</short>
        <long>&#10; Generic pin access for pins mapped into I/O space (for which the sbi, cbi&#10; instructions give atomic updates). This can be used for ports A-E.&#10;</long>
      </documentation>
      <instance number="19">
        <component-ref qname="HplAtm128GeneralIOPinP"/>
        <arguments>
          <value cst="U:">
            <type-int cname="unsigned char" unsigned="" size="I:1" alignment="I:1">
              <typename><typedef-ref name="uint8_t" ref="0x40218250"/></typename>
            </type-int>
          </value>
          <value cst="U:">
            <type-int cname="unsigned char" unsigned="" size="I:1" alignment="I:1">
              <typename><typedef-ref name="uint8_t" ref="0x40218250"/></typename>
            </type-int>
          </value>
          <value cst="U:">
            <type-int cname="unsigned char" unsigned="" size="I:1" alignment="I:1">
              <typename><typedef-ref name="uint8_t" ref="0x40218250"/></typename>
            </type-int>
          </value>
          <value cst="I:3">
            <type-int cname="int" size="I:4" alignment="I:4"></type-int>
          </value>
        </arguments>
      </instance>
      <module/>
    </component>
    <component qname="HplAtm128GeneralIOC.PortC.Bit4" loc="41(HplAtm128GeneralIOC.PortC.Bit4):/opt/tinyos-2.1.2/tos/chips/atm128/pins/sim/HplAtm128GeneralIOPinP.nc">
      <documentation loc="37:/opt/tinyos-2.1.2/tos/chips/atm128/pins/sim/HplAtm128GeneralIOPinP.nc">
        <short>&#10; Generic pin access for pins mapped into I/O space (for which the sbi, cbi&#10; instructions give atomic updates).</short>
        <long>&#10; Generic pin access for pins mapped into I/O space (for which the sbi, cbi&#10; instructions give atomic updates). This can be used for ports A-E.&#10;</long>
      </documentation>
      <instance number="20">
        <component-ref qname="HplAtm128GeneralIOPinP"/>
        <arguments>
          <value cst="U:">
            <type-int cname="unsigned char" unsigned="" size="I:1" alignment="I:1">
              <typename><typedef-ref name="uint8_t" ref="0x40218250"/></typename>
            </type-int>
          </value>
          <value cst="U:">
            <type-int cname="unsigned char" unsigned="" size="I:1" alignment="I:1">
              <typename><typedef-ref name="uint8_t" ref="0x40218250"/></typename>
            </type-int>
          </value>
          <value cst="U:">
            <type-int cname="unsigned char" unsigned="" size="I:1" alignment="I:1">
              <typename><typedef-ref name="uint8_t" ref="0x40218250"/></typename>
            </type-int>
          </value>
          <value cst="I:4">
            <type-int cname="int" size="I:4" alignment="I:4"></type-int>
          </value>
        </arguments>
      </instance>
      <module/>
    </component>
    <component qname="HplAtm128GeneralIOC.PortC.Bit5" loc="41(HplAtm128GeneralIOC.PortC.Bit5):/opt/tinyos-2.1.2/tos/chips/atm128/pins/sim/HplAtm128GeneralIOPinP.nc">
      <documentation loc="37:/opt/tinyos-2.1.2/tos/chips/atm128/pins/sim/HplAtm128GeneralIOPinP.nc">
        <short>&#10; Generic pin access for pins mapped into I/O space (for which the sbi, cbi&#10; instructions give atomic updates).</short>
        <long>&#10; Generic pin access for pins mapped into I/O space (for which the sbi, cbi&#10; instructions give atomic updates). This can be used for ports A-E.&#10;</long>
      </documentation>
      <instance number="21">
        <component-ref qname="HplAtm128GeneralIOPinP"/>
        <arguments>
          <value cst="U:">
            <type-int cname="unsigned char" unsigned="" size="I:1" alignment="I:1">
              <typename><typedef-ref name="uint8_t" ref="0x40218250"/></typename>
            </type-int>
          </value>
          <value cst="U:">
            <type-int cname="unsigned char" unsigned="" size="I:1" alignment="I:1">
              <typename><typedef-ref name="uint8_t" ref="0x40218250"/></typename>
            </type-int>
          </value>
          <value cst="U:">
            <type-int cname="unsigned char" unsigned="" size="I:1" alignment="I:1">
              <typename><typedef-ref name="uint8_t" ref="0x40218250"/></typename>
            </type-int>
          </value>
          <value cst="I:5">
            <type-int cname="int" size="I:4" alignment="I:4"></type-int>
          </value>
        </arguments>
      </instance>
      <module/>
    </component>
    <component qname="HplAtm128GeneralIOC.PortC.Bit6" loc="41(HplAtm128GeneralIOC.PortC.Bit6):/opt/tinyos-2.1.2/tos/chips/atm128/pins/sim/HplAtm128GeneralIOPinP.nc">
      <documentation loc="37:/opt/tinyos-2.1.2/tos/chips/atm128/pins/sim/HplAtm128GeneralIOPinP.nc">
        <short>&#10; Generic pin access for pins mapped into I/O space (for which the sbi, cbi&#10; instructions give atomic updates).</short>
        <long>&#10; Generic pin access for pins mapped into I/O space (for which the sbi, cbi&#10; instructions give atomic updates). This can be used for ports A-E.&#10;</long>
      </documentation>
      <instance number="22">
        <component-ref qname="HplAtm128GeneralIOPinP"/>
        <arguments>
          <value cst="U:">
            <type-int cname="unsigned char" unsigned="" size="I:1" alignment="I:1">
              <typename><typedef-ref name="uint8_t" ref="0x40218250"/></typename>
            </type-int>
          </value>
          <value cst="U:">
            <type-int cname="unsigned char" unsigned="" size="I:1" alignment="I:1">
              <typename><typedef-ref name="uint8_t" ref="0x40218250"/></typename>
            </type-int>
          </value>
          <value cst="U:">
            <type-int cname="unsigned char" unsigned="" size="I:1" alignment="I:1">
              <typename><typedef-ref name="uint8_t" ref="0x40218250"/></typename>
            </type-int>
          </value>
          <value cst="I:6">
            <type-int cname="int" size="I:4" alignment="I:4"></type-int>
          </value>
        </arguments>
      </instance>
      <module/>
    </component>
    <component qname="HplAtm128GeneralIOC.PortC.Bit7" loc="41(HplAtm128GeneralIOC.PortC.Bit7):/opt/tinyos-2.1.2/tos/chips/atm128/pins/sim/HplAtm128GeneralIOPinP.nc">
      <documentation loc="37:/opt/tinyos-2.1.2/tos/chips/atm128/pins/sim/HplAtm128GeneralIOPinP.nc">
        <short>&#10; Generic pin access for pins mapped into I/O space (for which the sbi, cbi&#10; instructions give atomic updates).</short>
        <long>&#10; Generic pin access for pins mapped into I/O space (for which the sbi, cbi&#10; instructions give atomic updates). This can be used for ports A-E.&#10;</long>
      </documentation>
      <instance number="23">
        <component-ref qname="HplAtm128GeneralIOPinP"/>
        <arguments>
          <value cst="U:">
            <type-int cname="unsigned char" unsigned="" size="I:1" alignment="I:1">
              <typename><typedef-ref name="uint8_t" ref="0x40218250"/></typename>
            </type-int>
          </value>
          <value cst="U:">
            <type-int cname="unsigned char" unsigned="" size="I:1" alignment="I:1">
              <typename><typedef-ref name="uint8_t" ref="0x40218250"/></typename>
            </type-int>
          </value>
          <value cst="U:">
            <type-int cname="unsigned char" unsigned="" size="I:1" alignment="I:1">
              <typename><typedef-ref name="uint8_t" ref="0x40218250"/></typename>
            </type-int>
          </value>
          <value cst="I:7">
            <type-int cname="int" size="I:4" alignment="I:4"></type-int>
          </value>
        </arguments>
      </instance>
      <module/>
    </component>
    <component qname="HplAtm128GeneralIOC.PortD" loc="40(HplAtm128GeneralIOC.PortD):/opt/tinyos-2.1.2/tos/chips/atm128/pins/HplAtm128GeneralIOPortP.nc">
      <documentation loc="34:/opt/tinyos-2.1.2/tos/chips/atm128/pins/HplAtm128GeneralIOPortP.nc">
        <short>&#10; Generic component to expose a full 8-bit port of GPIO pins.</short>
        <long>&#10; Generic component to expose a full 8-bit port of GPIO pins.&#10;&#10; @author Martin Turon &#60;mturon@xbow.com>&#10;</long>
      </documentation>
      <instance number="3">
        <component-ref qname="HplAtm128GeneralIOPortP"/>
        <arguments>
          <value cst="I:18">
            <type-int cname="unsigned char" unsigned="" size="I:1" alignment="I:1">
              <typename><typedef-ref name="uint8_t" ref="0x40218250"/></typename>
            </type-int>
          </value>
          <value cst="I:17">
            <type-int cname="unsigned char" unsigned="" size="I:1" alignment="I:1">
              <typename><typedef-ref name="uint8_t" ref="0x40218250"/></typename>
            </type-int>
          </value>
          <value cst="I:16">
            <type-int cname="unsigned char" unsigned="" size="I:1" alignment="I:1">
              <typename><typedef-ref name="uint8_t" ref="0x40218250"/></typename>
            </type-int>
          </value>
        </arguments>
      </instance>
      <configuration/>
    </component>
    <component qname="HplAtm128GeneralIOC.PortD.Bit0" loc="41(HplAtm128GeneralIOC.PortD.Bit0):/opt/tinyos-2.1.2/tos/chips/atm128/pins/sim/HplAtm128GeneralIOPinP.nc">
      <documentation loc="37:/opt/tinyos-2.1.2/tos/chips/atm128/pins/sim/HplAtm128GeneralIOPinP.nc">
        <short>&#10; Generic pin access for pins mapped into I/O space (for which the sbi, cbi&#10; instructions give atomic updates).</short>
        <long>&#10; Generic pin access for pins mapped into I/O space (for which the sbi, cbi&#10; instructions give atomic updates). This can be used for ports A-E.&#10;</long>
      </documentation>
      <instance number="24">
        <component-ref qname="HplAtm128GeneralIOPinP"/>
        <arguments>
          <value cst="U:">
            <type-int cname="unsigned char" unsigned="" size="I:1" alignment="I:1">
              <typename><typedef-ref name="uint8_t" ref="0x40218250"/></typename>
            </type-int>
          </value>
          <value cst="U:">
            <type-int cname="unsigned char" unsigned="" size="I:1" alignment="I:1">
              <typename><typedef-ref name="uint8_t" ref="0x40218250"/></typename>
            </type-int>
          </value>
          <value cst="U:">
            <type-int cname="unsigned char" unsigned="" size="I:1" alignment="I:1">
              <typename><typedef-ref name="uint8_t" ref="0x40218250"/></typename>
            </type-int>
          </value>
          <value cst="I:0">
            <type-int cname="int" size="I:4" alignment="I:4"></type-int>
          </value>
        </arguments>
      </instance>
      <module/>
    </component>
    <component qname="HplAtm128GeneralIOC.PortD.Bit1" loc="41(HplAtm128GeneralIOC.PortD.Bit1):/opt/tinyos-2.1.2/tos/chips/atm128/pins/sim/HplAtm128GeneralIOPinP.nc">
      <documentation loc="37:/opt/tinyos-2.1.2/tos/chips/atm128/pins/sim/HplAtm128GeneralIOPinP.nc">
        <short>&#10; Generic pin access for pins mapped into I/O space (for which the sbi, cbi&#10; instructions give atomic updates).</short>
        <long>&#10; Generic pin access for pins mapped into I/O space (for which the sbi, cbi&#10; instructions give atomic updates). This can be used for ports A-E.&#10;</long>
      </documentation>
      <instance number="25">
        <component-ref qname="HplAtm128GeneralIOPinP"/>
        <arguments>
          <value cst="U:">
            <type-int cname="unsigned char" unsigned="" size="I:1" alignment="I:1">
              <typename><typedef-ref name="uint8_t" ref="0x40218250"/></typename>
            </type-int>
          </value>
          <value cst="U:">
            <type-int cname="unsigned char" unsigned="" size="I:1" alignment="I:1">
              <typename><typedef-ref name="uint8_t" ref="0x40218250"/></typename>
            </type-int>
          </value>
          <value cst="U:">
            <type-int cname="unsigned char" unsigned="" size="I:1" alignment="I:1">
              <typename><typedef-ref name="uint8_t" ref="0x40218250"/></typename>
            </type-int>
          </value>
          <value cst="I:1">
            <type-int cname="int" size="I:4" alignment="I:4"></type-int>
          </value>
        </arguments>
      </instance>
      <module/>
    </component>
    <component qname="HplAtm128GeneralIOC.PortD.Bit2" loc="41(HplAtm128GeneralIOC.PortD.Bit2):/opt/tinyos-2.1.2/tos/chips/atm128/pins/sim/HplAtm128GeneralIOPinP.nc">
      <documentation loc="37:/opt/tinyos-2.1.2/tos/chips/atm128/pins/sim/HplAtm128GeneralIOPinP.nc">
        <short>&#10; Generic pin access for pins mapped into I/O space (for which the sbi, cbi&#10; instructions give atomic updates).</short>
        <long>&#10; Generic pin access for pins mapped into I/O space (for which the sbi, cbi&#10; instructions give atomic updates). This can be used for ports A-E.&#10;</long>
      </documentation>
      <instance number="26">
        <component-ref qname="HplAtm128GeneralIOPinP"/>
        <arguments>
          <value cst="U:">
            <type-int cname="unsigned char" unsigned="" size="I:1" alignment="I:1">
              <typename><typedef-ref name="uint8_t" ref="0x40218250"/></typename>
            </type-int>
          </value>
          <value cst="U:">
            <type-int cname="unsigned char" unsigned="" size="I:1" alignment="I:1">
              <typename><typedef-ref name="uint8_t" ref="0x40218250"/></typename>
            </type-int>
          </value>
          <value cst="U:">
            <type-int cname="unsigned char" unsigned="" size="I:1" alignment="I:1">
              <typename><typedef-ref name="uint8_t" ref="0x40218250"/></typename>
            </type-int>
          </value>
          <value cst="I:2">
            <type-int cname="int" size="I:4" alignment="I:4"></type-int>
          </value>
        </arguments>
      </instance>
      <module/>
    </component>
    <component qname="HplAtm128GeneralIOC.PortD.Bit3" loc="41(HplAtm128GeneralIOC.PortD.Bit3):/opt/tinyos-2.1.2/tos/chips/atm128/pins/sim/HplAtm128GeneralIOPinP.nc">
      <documentation loc="37:/opt/tinyos-2.1.2/tos/chips/atm128/pins/sim/HplAtm128GeneralIOPinP.nc">
        <short>&#10; Generic pin access for pins mapped into I/O space (for which the sbi, cbi&#10; instructions give atomic updates).</short>
        <long>&#10; Generic pin access for pins mapped into I/O space (for which the sbi, cbi&#10; instructions give atomic updates). This can be used for ports A-E.&#10;</long>
      </documentation>
      <instance number="27">
        <component-ref qname="HplAtm128GeneralIOPinP"/>
        <arguments>
          <value cst="U:">
            <type-int cname="unsigned char" unsigned="" size="I:1" alignment="I:1">
              <typename><typedef-ref name="uint8_t" ref="0x40218250"/></typename>
            </type-int>
          </value>
          <value cst="U:">
            <type-int cname="unsigned char" unsigned="" size="I:1" alignment="I:1">
              <typename><typedef-ref name="uint8_t" ref="0x40218250"/></typename>
            </type-int>
          </value>
          <value cst="U:">
            <type-int cname="unsigned char" unsigned="" size="I:1" alignment="I:1">
              <typename><typedef-ref name="uint8_t" ref="0x40218250"/></typename>
            </type-int>
          </value>
          <value cst="I:3">
            <type-int cname="int" size="I:4" alignment="I:4"></type-int>
          </value>
        </arguments>
      </instance>
      <module/>
    </component>
    <component qname="HplAtm128GeneralIOC.PortD.Bit4" loc="41(HplAtm128GeneralIOC.PortD.Bit4):/opt/tinyos-2.1.2/tos/chips/atm128/pins/sim/HplAtm128GeneralIOPinP.nc">
      <documentation loc="37:/opt/tinyos-2.1.2/tos/chips/atm128/pins/sim/HplAtm128GeneralIOPinP.nc">
        <short>&#10; Generic pin access for pins mapped into I/O space (for which the sbi, cbi&#10; instructions give atomic updates).</short>
        <long>&#10; Generic pin access for pins mapped into I/O space (for which the sbi, cbi&#10; instructions give atomic updates). This can be used for ports A-E.&#10;</long>
      </documentation>
      <instance number="28">
        <component-ref qname="HplAtm128GeneralIOPinP"/>
        <arguments>
          <value cst="U:">
            <type-int cname="unsigned char" unsigned="" size="I:1" alignment="I:1">
              <typename><typedef-ref name="uint8_t" ref="0x40218250"/></typename>
            </type-int>
          </value>
          <value cst="U:">
            <type-int cname="unsigned char" unsigned="" size="I:1" alignment="I:1">
              <typename><typedef-ref name="uint8_t" ref="0x40218250"/></typename>
            </type-int>
          </value>
          <value cst="U:">
            <type-int cname="unsigned char" unsigned="" size="I:1" alignment="I:1">
              <typename><typedef-ref name="uint8_t" ref="0x40218250"/></typename>
            </type-int>
          </value>
          <value cst="I:4">
            <type-int cname="int" size="I:4" alignment="I:4"></type-int>
          </value>
        </arguments>
      </instance>
      <module/>
    </component>
    <component qname="HplAtm128GeneralIOC.PortD.Bit5" loc="41(HplAtm128GeneralIOC.PortD.Bit5):/opt/tinyos-2.1.2/tos/chips/atm128/pins/sim/HplAtm128GeneralIOPinP.nc">
      <documentation loc="37:/opt/tinyos-2.1.2/tos/chips/atm128/pins/sim/HplAtm128GeneralIOPinP.nc">
        <short>&#10; Generic pin access for pins mapped into I/O space (for which the sbi, cbi&#10; instructions give atomic updates).</short>
        <long>&#10; Generic pin access for pins mapped into I/O space (for which the sbi, cbi&#10; instructions give atomic updates). This can be used for ports A-E.&#10;</long>
      </documentation>
      <instance number="29">
        <component-ref qname="HplAtm128GeneralIOPinP"/>
        <arguments>
          <value cst="U:">
            <type-int cname="unsigned char" unsigned="" size="I:1" alignment="I:1">
              <typename><typedef-ref name="uint8_t" ref="0x40218250"/></typename>
            </type-int>
          </value>
          <value cst="U:">
            <type-int cname="unsigned char" unsigned="" size="I:1" alignment="I:1">
              <typename><typedef-ref name="uint8_t" ref="0x40218250"/></typename>
            </type-int>
          </value>
          <value cst="U:">
            <type-int cname="unsigned char" unsigned="" size="I:1" alignment="I:1">
              <typename><typedef-ref name="uint8_t" ref="0x40218250"/></typename>
            </type-int>
          </value>
          <value cst="I:5">
            <type-int cname="int" size="I:4" alignment="I:4"></type-int>
          </value>
        </arguments>
      </instance>
      <module/>
    </component>
    <component qname="HplAtm128GeneralIOC.PortD.Bit6" loc="41(HplAtm128GeneralIOC.PortD.Bit6):/opt/tinyos-2.1.2/tos/chips/atm128/pins/sim/HplAtm128GeneralIOPinP.nc">
      <documentation loc="37:/opt/tinyos-2.1.2/tos/chips/atm128/pins/sim/HplAtm128GeneralIOPinP.nc">
        <short>&#10; Generic pin access for pins mapped into I/O space (for which the sbi, cbi&#10; instructions give atomic updates).</short>
        <long>&#10; Generic pin access for pins mapped into I/O space (for which the sbi, cbi&#10; instructions give atomic updates). This can be used for ports A-E.&#10;</long>
      </documentation>
      <instance number="30">
        <component-ref qname="HplAtm128GeneralIOPinP"/>
        <arguments>
          <value cst="U:">
            <type-int cname="unsigned char" unsigned="" size="I:1" alignment="I:1">
              <typename><typedef-ref name="uint8_t" ref="0x40218250"/></typename>
            </type-int>
          </value>
          <value cst="U:">
            <type-int cname="unsigned char" unsigned="" size="I:1" alignment="I:1">
              <typename><typedef-ref name="uint8_t" ref="0x40218250"/></typename>
            </type-int>
          </value>
          <value cst="U:">
            <type-int cname="unsigned char" unsigned="" size="I:1" alignment="I:1">
              <typename><typedef-ref name="uint8_t" ref="0x40218250"/></typename>
            </type-int>
          </value>
          <value cst="I:6">
            <type-int cname="int" size="I:4" alignment="I:4"></type-int>
          </value>
        </arguments>
      </instance>
      <module/>
    </component>
    <component qname="HplAtm128GeneralIOC.PortD.Bit7" loc="41(HplAtm128GeneralIOC.PortD.Bit7):/opt/tinyos-2.1.2/tos/chips/atm128/pins/sim/HplAtm128GeneralIOPinP.nc">
      <documentation loc="37:/opt/tinyos-2.1.2/tos/chips/atm128/pins/sim/HplAtm128GeneralIOPinP.nc">
        <short>&#10; Generic pin access for pins mapped into I/O space (for which the sbi, cbi&#10; instructions give atomic updates).</short>
        <long>&#10; Generic pin access for pins mapped into I/O space (for which the sbi, cbi&#10; instructions give atomic updates). This can be used for ports A-E.&#10;</long>
      </documentation>
      <instance number="31">
        <component-ref qname="HplAtm128GeneralIOPinP"/>
        <arguments>
          <value cst="U:">
            <type-int cname="unsigned char" unsigned="" size="I:1" alignment="I:1">
              <typename><typedef-ref name="uint8_t" ref="0x40218250"/></typename>
            </type-int>
          </value>
          <value cst="U:">
            <type-int cname="unsigned char" unsigned="" size="I:1" alignment="I:1">
              <typename><typedef-ref name="uint8_t" ref="0x40218250"/></typename>
            </type-int>
          </value>
          <value cst="U:">
            <type-int cname="unsigned char" unsigned="" size="I:1" alignment="I:1">
              <typename><typedef-ref name="uint8_t" ref="0x40218250"/></typename>
            </type-int>
          </value>
          <value cst="I:7">
            <type-int cname="int" size="I:4" alignment="I:4"></type-int>
          </value>
        </arguments>
      </instance>
      <module/>
    </component>
    <component qname="HplAtm128GeneralIOC.PortE" loc="40(HplAtm128GeneralIOC.PortE):/opt/tinyos-2.1.2/tos/chips/atm128/pins/HplAtm128GeneralIOPortP.nc">
      <documentation loc="34:/opt/tinyos-2.1.2/tos/chips/atm128/pins/HplAtm128GeneralIOPortP.nc">
        <short>&#10; Generic component to expose a full 8-bit port of GPIO pins.</short>
        <long>&#10; Generic component to expose a full 8-bit port of GPIO pins.&#10;&#10; @author Martin Turon &#60;mturon@xbow.com>&#10;</long>
      </documentation>
      <instance number="4">
        <component-ref qname="HplAtm128GeneralIOPortP"/>
        <arguments>
          <value cst="I:3">
            <type-int cname="unsigned char" unsigned="" size="I:1" alignment="I:1">
              <typename><typedef-ref name="uint8_t" ref="0x40218250"/></typename>
            </type-int>
          </value>
          <value cst="I:2">
            <type-int cname="unsigned char" unsigned="" size="I:1" alignment="I:1">
              <typename><typedef-ref name="uint8_t" ref="0x40218250"/></typename>
            </type-int>
          </value>
          <value cst="I:1">
            <type-int cname="unsigned char" unsigned="" size="I:1" alignment="I:1">
              <typename><typedef-ref name="uint8_t" ref="0x40218250"/></typename>
            </type-int>
          </value>
        </arguments>
      </instance>
      <configuration/>
    </component>
    <component qname="HplAtm128GeneralIOC.PortE.Bit0" loc="41(HplAtm128GeneralIOC.PortE.Bit0):/opt/tinyos-2.1.2/tos/chips/atm128/pins/sim/HplAtm128GeneralIOPinP.nc">
      <documentation loc="37:/opt/tinyos-2.1.2/tos/chips/atm128/pins/sim/HplAtm128GeneralIOPinP.nc">
        <short>&#10; Generic pin access for pins mapped into I/O space (for which the sbi, cbi&#10; instructions give atomic updates).</short>
        <long>&#10; Generic pin access for pins mapped into I/O space (for which the sbi, cbi&#10; instructions give atomic updates). This can be used for ports A-E.&#10;</long>
      </documentation>
      <instance number="32">
        <component-ref qname="HplAtm128GeneralIOPinP"/>
        <arguments>
          <value cst="U:">
            <type-int cname="unsigned char" unsigned="" size="I:1" alignment="I:1">
              <typename><typedef-ref name="uint8_t" ref="0x40218250"/></typename>
            </type-int>
          </value>
          <value cst="U:">
            <type-int cname="unsigned char" unsigned="" size="I:1" alignment="I:1">
              <typename><typedef-ref name="uint8_t" ref="0x40218250"/></typename>
            </type-int>
          </value>
          <value cst="U:">
            <type-int cname="unsigned char" unsigned="" size="I:1" alignment="I:1">
              <typename><typedef-ref name="uint8_t" ref="0x40218250"/></typename>
            </type-int>
          </value>
          <value cst="I:0">
            <type-int cname="int" size="I:4" alignment="I:4"></type-int>
          </value>
        </arguments>
      </instance>
      <module/>
    </component>
    <component qname="HplAtm128GeneralIOC.PortE.Bit1" loc="41(HplAtm128GeneralIOC.PortE.Bit1):/opt/tinyos-2.1.2/tos/chips/atm128/pins/sim/HplAtm128GeneralIOPinP.nc">
      <documentation loc="37:/opt/tinyos-2.1.2/tos/chips/atm128/pins/sim/HplAtm128GeneralIOPinP.nc">
        <short>&#10; Generic pin access for pins mapped into I/O space (for which the sbi, cbi&#10; instructions give atomic updates).</short>
        <long>&#10; Generic pin access for pins mapped into I/O space (for which the sbi, cbi&#10; instructions give atomic updates). This can be used for ports A-E.&#10;</long>
      </documentation>
      <instance number="33">
        <component-ref qname="HplAtm128GeneralIOPinP"/>
        <arguments>
          <value cst="U:">
            <type-int cname="unsigned char" unsigned="" size="I:1" alignment="I:1">
              <typename><typedef-ref name="uint8_t" ref="0x40218250"/></typename>
            </type-int>
          </value>
          <value cst="U:">
            <type-int cname="unsigned char" unsigned="" size="I:1" alignment="I:1">
              <typename><typedef-ref name="uint8_t" ref="0x40218250"/></typename>
            </type-int>
          </value>
          <value cst="U:">
            <type-int cname="unsigned char" unsigned="" size="I:1" alignment="I:1">
              <typename><typedef-ref name="uint8_t" ref="0x40218250"/></typename>
            </type-int>
          </value>
          <value cst="I:1">
            <type-int cname="int" size="I:4" alignment="I:4"></type-int>
          </value>
        </arguments>
      </instance>
      <module/>
    </component>
    <component qname="HplAtm128GeneralIOC.PortE.Bit2" loc="41(HplAtm128GeneralIOC.PortE.Bit2):/opt/tinyos-2.1.2/tos/chips/atm128/pins/sim/HplAtm128GeneralIOPinP.nc">
      <documentation loc="37:/opt/tinyos-2.1.2/tos/chips/atm128/pins/sim/HplAtm128GeneralIOPinP.nc">
        <short>&#10; Generic pin access for pins mapped into I/O space (for which the sbi, cbi&#10; instructions give atomic updates).</short>
        <long>&#10; Generic pin access for pins mapped into I/O space (for which the sbi, cbi&#10; instructions give atomic updates). This can be used for ports A-E.&#10;</long>
      </documentation>
      <instance number="34">
        <component-ref qname="HplAtm128GeneralIOPinP"/>
        <arguments>
          <value cst="U:">
            <type-int cname="unsigned char" unsigned="" size="I:1" alignment="I:1">
              <typename><typedef-ref name="uint8_t" ref="0x40218250"/></typename>
            </type-int>
          </value>
          <value cst="U:">
            <type-int cname="unsigned char" unsigned="" size="I:1" alignment="I:1">
              <typename><typedef-ref name="uint8_t" ref="0x40218250"/></typename>
            </type-int>
          </value>
          <value cst="U:">
            <type-int cname="unsigned char" unsigned="" size="I:1" alignment="I:1">
              <typename><typedef-ref name="uint8_t" ref="0x40218250"/></typename>
            </type-int>
          </value>
          <value cst="I:2">
            <type-int cname="int" size="I:4" alignment="I:4"></type-int>
          </value>
        </arguments>
      </instance>
      <module/>
    </component>
    <component qname="HplAtm128GeneralIOC.PortE.Bit3" loc="41(HplAtm128GeneralIOC.PortE.Bit3):/opt/tinyos-2.1.2/tos/chips/atm128/pins/sim/HplAtm128GeneralIOPinP.nc">
      <documentation loc="37:/opt/tinyos-2.1.2/tos/chips/atm128/pins/sim/HplAtm128GeneralIOPinP.nc">
        <short>&#10; Generic pin access for pins mapped into I/O space (for which the sbi, cbi&#10; instructions give atomic updates).</short>
        <long>&#10; Generic pin access for pins mapped into I/O space (for which the sbi, cbi&#10; instructions give atomic updates). This can be used for ports A-E.&#10;</long>
      </documentation>
      <instance number="35">
        <component-ref qname="HplAtm128GeneralIOPinP"/>
        <arguments>
          <value cst="U:">
            <type-int cname="unsigned char" unsigned="" size="I:1" alignment="I:1">
              <typename><typedef-ref name="uint8_t" ref="0x40218250"/></typename>
            </type-int>
          </value>
          <value cst="U:">
            <type-int cname="unsigned char" unsigned="" size="I:1" alignment="I:1">
              <typename><typedef-ref name="uint8_t" ref="0x40218250"/></typename>
            </type-int>
          </value>
          <value cst="U:">
            <type-int cname="unsigned char" unsigned="" size="I:1" alignment="I:1">
              <typename><typedef-ref name="uint8_t" ref="0x40218250"/></typename>
            </type-int>
          </value>
          <value cst="I:3">
            <type-int cname="int" size="I:4" alignment="I:4"></type-int>
          </value>
        </arguments>
      </instance>
      <module/>
    </component>
    <component qname="HplAtm128GeneralIOC.PortE.Bit4" loc="41(HplAtm128GeneralIOC.PortE.Bit4):/opt/tinyos-2.1.2/tos/chips/atm128/pins/sim/HplAtm128GeneralIOPinP.nc">
      <documentation loc="37:/opt/tinyos-2.1.2/tos/chips/atm128/pins/sim/HplAtm128GeneralIOPinP.nc">
        <short>&#10; Generic pin access for pins mapped into I/O space (for which the sbi, cbi&#10; instructions give atomic updates).</short>
        <long>&#10; Generic pin access for pins mapped into I/O space (for which the sbi, cbi&#10; instructions give atomic updates). This can be used for ports A-E.&#10;</long>
      </documentation>
      <instance number="36">
        <component-ref qname="HplAtm128GeneralIOPinP"/>
        <arguments>
          <value cst="U:">
            <type-int cname="unsigned char" unsigned="" size="I:1" alignment="I:1">
              <typename><typedef-ref name="uint8_t" ref="0x40218250"/></typename>
            </type-int>
          </value>
          <value cst="U:">
            <type-int cname="unsigned char" unsigned="" size="I:1" alignment="I:1">
              <typename><typedef-ref name="uint8_t" ref="0x40218250"/></typename>
            </type-int>
          </value>
          <value cst="U:">
            <type-int cname="unsigned char" unsigned="" size="I:1" alignment="I:1">
              <typename><typedef-ref name="uint8_t" ref="0x40218250"/></typename>
            </type-int>
          </value>
          <value cst="I:4">
            <type-int cname="int" size="I:4" alignment="I:4"></type-int>
          </value>
        </arguments>
      </instance>
      <module/>
    </component>
    <component qname="HplAtm128GeneralIOC.PortE.Bit5" loc="41(HplAtm128GeneralIOC.PortE.Bit5):/opt/tinyos-2.1.2/tos/chips/atm128/pins/sim/HplAtm128GeneralIOPinP.nc">
      <documentation loc="37:/opt/tinyos-2.1.2/tos/chips/atm128/pins/sim/HplAtm128GeneralIOPinP.nc">
        <short>&#10; Generic pin access for pins mapped into I/O space (for which the sbi, cbi&#10; instructions give atomic updates).</short>
        <long>&#10; Generic pin access for pins mapped into I/O space (for which the sbi, cbi&#10; instructions give atomic updates). This can be used for ports A-E.&#10;</long>
      </documentation>
      <instance number="37">
        <component-ref qname="HplAtm128GeneralIOPinP"/>
        <arguments>
          <value cst="U:">
            <type-int cname="unsigned char" unsigned="" size="I:1" alignment="I:1">
              <typename><typedef-ref name="uint8_t" ref="0x40218250"/></typename>
            </type-int>
          </value>
          <value cst="U:">
            <type-int cname="unsigned char" unsigned="" size="I:1" alignment="I:1">
              <typename><typedef-ref name="uint8_t" ref="0x40218250"/></typename>
            </type-int>
          </value>
          <value cst="U:">
            <type-int cname="unsigned char" unsigned="" size="I:1" alignment="I:1">
              <typename><typedef-ref name="uint8_t" ref="0x40218250"/></typename>
            </type-int>
          </value>
          <value cst="I:5">
            <type-int cname="int" size="I:4" alignment="I:4"></type-int>
          </value>
        </arguments>
      </instance>
      <module/>
    </component>
    <component qname="HplAtm128GeneralIOC.PortE.Bit6" loc="41(HplAtm128GeneralIOC.PortE.Bit6):/opt/tinyos-2.1.2/tos/chips/atm128/pins/sim/HplAtm128GeneralIOPinP.nc">
      <documentation loc="37:/opt/tinyos-2.1.2/tos/chips/atm128/pins/sim/HplAtm128GeneralIOPinP.nc">
        <short>&#10; Generic pin access for pins mapped into I/O space (for which the sbi, cbi&#10; instructions give atomic updates).</short>
        <long>&#10; Generic pin access for pins mapped into I/O space (for which the sbi, cbi&#10; instructions give atomic updates). This can be used for ports A-E.&#10;</long>
      </documentation>
      <instance number="38">
        <component-ref qname="HplAtm128GeneralIOPinP"/>
        <arguments>
          <value cst="U:">
            <type-int cname="unsigned char" unsigned="" size="I:1" alignment="I:1">
              <typename><typedef-ref name="uint8_t" ref="0x40218250"/></typename>
            </type-int>
          </value>
          <value cst="U:">
            <type-int cname="unsigned char" unsigned="" size="I:1" alignment="I:1">
              <typename><typedef-ref name="uint8_t" ref="0x40218250"/></typename>
            </type-int>
          </value>
          <value cst="U:">
            <type-int cname="unsigned char" unsigned="" size="I:1" alignment="I:1">
              <typename><typedef-ref name="uint8_t" ref="0x40218250"/></typename>
            </type-int>
          </value>
          <value cst="I:6">
            <type-int cname="int" size="I:4" alignment="I:4"></type-int>
          </value>
        </arguments>
      </instance>
      <module/>
    </component>
    <component qname="HplAtm128GeneralIOC.PortE.Bit7" loc="41(HplAtm128GeneralIOC.PortE.Bit7):/opt/tinyos-2.1.2/tos/chips/atm128/pins/sim/HplAtm128GeneralIOPinP.nc">
      <documentation loc="37:/opt/tinyos-2.1.2/tos/chips/atm128/pins/sim/HplAtm128GeneralIOPinP.nc">
        <short>&#10; Generic pin access for pins mapped into I/O space (for which the sbi, cbi&#10; instructions give atomic updates).</short>
        <long>&#10; Generic pin access for pins mapped into I/O space (for which the sbi, cbi&#10; instructions give atomic updates). This can be used for ports A-E.&#10;</long>
      </documentation>
      <instance number="39">
        <component-ref qname="HplAtm128GeneralIOPinP"/>
        <arguments>
          <value cst="U:">
            <type-int cname="unsigned char" unsigned="" size="I:1" alignment="I:1">
              <typename><typedef-ref name="uint8_t" ref="0x40218250"/></typename>
            </type-int>
          </value>
          <value cst="U:">
            <type-int cname="unsigned char" unsigned="" size="I:1" alignment="I:1">
              <typename><typedef-ref name="uint8_t" ref="0x40218250"/></typename>
            </type-int>
          </value>
          <value cst="U:">
            <type-int cname="unsigned char" unsigned="" size="I:1" alignment="I:1">
              <typename><typedef-ref name="uint8_t" ref="0x40218250"/></typename>
            </type-int>
          </value>
          <value cst="I:7">
            <type-int cname="int" size="I:4" alignment="I:4"></type-int>
          </value>
        </arguments>
      </instance>
      <module/>
    </component>
    <component qname="HplAtm128GeneralIOC.PortF" loc="40(HplAtm128GeneralIOC.PortF):/opt/tinyos-2.1.2/tos/chips/atm128/pins/HplAtm128GeneralIOPortP.nc">
      <documentation loc="34:/opt/tinyos-2.1.2/tos/chips/atm128/pins/HplAtm128GeneralIOPortP.nc">
        <short>&#10; Generic component to expose a full 8-bit port of GPIO pins.</short>
        <long>&#10; Generic component to expose a full 8-bit port of GPIO pins.&#10;&#10; @author Martin Turon &#60;mturon@xbow.com>&#10;</long>
      </documentation>
      <instance number="5">
        <component-ref qname="HplAtm128GeneralIOPortP"/>
        <arguments>
          <value cst="I:98">
            <type-int cname="unsigned char" unsigned="" size="I:1" alignment="I:1">
              <typename><typedef-ref name="uint8_t" ref="0x40218250"/></typename>
            </type-int>
          </value>
          <value cst="I:97">
            <type-int cname="unsigned char" unsigned="" size="I:1" alignment="I:1">
              <typename><typedef-ref name="uint8_t" ref="0x40218250"/></typename>
            </type-int>
          </value>
          <value cst="I:0">
            <type-int cname="unsigned char" unsigned="" size="I:1" alignment="I:1">
              <typename><typedef-ref name="uint8_t" ref="0x40218250"/></typename>
            </type-int>
          </value>
        </arguments>
      </instance>
      <configuration/>
    </component>
    <component qname="HplAtm128GeneralIOC.PortF.Bit0" loc="41(HplAtm128GeneralIOC.PortF.Bit0):/opt/tinyos-2.1.2/tos/chips/atm128/pins/sim/HplAtm128GeneralIOPinP.nc">
      <documentation loc="37:/opt/tinyos-2.1.2/tos/chips/atm128/pins/sim/HplAtm128GeneralIOPinP.nc">
        <short>&#10; Generic pin access for pins mapped into I/O space (for which the sbi, cbi&#10; instructions give atomic updates).</short>
        <long>&#10; Generic pin access for pins mapped into I/O space (for which the sbi, cbi&#10; instructions give atomic updates). This can be used for ports A-E.&#10;</long>
      </documentation>
      <instance number="40">
        <component-ref qname="HplAtm128GeneralIOPinP"/>
        <arguments>
          <value cst="U:">
            <type-int cname="unsigned char" unsigned="" size="I:1" alignment="I:1">
              <typename><typedef-ref name="uint8_t" ref="0x40218250"/></typename>
            </type-int>
          </value>
          <value cst="U:">
            <type-int cname="unsigned char" unsigned="" size="I:1" alignment="I:1">
              <typename><typedef-ref name="uint8_t" ref="0x40218250"/></typename>
            </type-int>
          </value>
          <value cst="U:">
            <type-int cname="unsigned char" unsigned="" size="I:1" alignment="I:1">
              <typename><typedef-ref name="uint8_t" ref="0x40218250"/></typename>
            </type-int>
          </value>
          <value cst="I:0">
            <type-int cname="int" size="I:4" alignment="I:4"></type-int>
          </value>
        </arguments>
      </instance>
      <module/>
    </component>
    <component qname="HplAtm128GeneralIOC.PortF.Bit1" loc="41(HplAtm128GeneralIOC.PortF.Bit1):/opt/tinyos-2.1.2/tos/chips/atm128/pins/sim/HplAtm128GeneralIOPinP.nc">
      <documentation loc="37:/opt/tinyos-2.1.2/tos/chips/atm128/pins/sim/HplAtm128GeneralIOPinP.nc">
        <short>&#10; Generic pin access for pins mapped into I/O space (for which the sbi, cbi&#10; instructions give atomic updates).</short>
        <long>&#10; Generic pin access for pins mapped into I/O space (for which the sbi, cbi&#10; instructions give atomic updates). This can be used for ports A-E.&#10;</long>
      </documentation>
      <instance number="41">
        <component-ref qname="HplAtm128GeneralIOPinP"/>
        <arguments>
          <value cst="U:">
            <type-int cname="unsigned char" unsigned="" size="I:1" alignment="I:1">
              <typename><typedef-ref name="uint8_t" ref="0x40218250"/></typename>
            </type-int>
          </value>
          <value cst="U:">
            <type-int cname="unsigned char" unsigned="" size="I:1" alignment="I:1">
              <typename><typedef-ref name="uint8_t" ref="0x40218250"/></typename>
            </type-int>
          </value>
          <value cst="U:">
            <type-int cname="unsigned char" unsigned="" size="I:1" alignment="I:1">
              <typename><typedef-ref name="uint8_t" ref="0x40218250"/></typename>
            </type-int>
          </value>
          <value cst="I:1">
            <type-int cname="int" size="I:4" alignment="I:4"></type-int>
          </value>
        </arguments>
      </instance>
      <module/>
    </component>
    <component qname="HplAtm128GeneralIOC.PortF.Bit2" loc="41(HplAtm128GeneralIOC.PortF.Bit2):/opt/tinyos-2.1.2/tos/chips/atm128/pins/sim/HplAtm128GeneralIOPinP.nc">
      <documentation loc="37:/opt/tinyos-2.1.2/tos/chips/atm128/pins/sim/HplAtm128GeneralIOPinP.nc">
        <short>&#10; Generic pin access for pins mapped into I/O space (for which the sbi, cbi&#10; instructions give atomic updates).</short>
        <long>&#10; Generic pin access for pins mapped into I/O space (for which the sbi, cbi&#10; instructions give atomic updates). This can be used for ports A-E.&#10;</long>
      </documentation>
      <instance number="42">
        <component-ref qname="HplAtm128GeneralIOPinP"/>
        <arguments>
          <value cst="U:">
            <type-int cname="unsigned char" unsigned="" size="I:1" alignment="I:1">
              <typename><typedef-ref name="uint8_t" ref="0x40218250"/></typename>
            </type-int>
          </value>
          <value cst="U:">
            <type-int cname="unsigned char" unsigned="" size="I:1" alignment="I:1">
              <typename><typedef-ref name="uint8_t" ref="0x40218250"/></typename>
            </type-int>
          </value>
          <value cst="U:">
            <type-int cname="unsigned char" unsigned="" size="I:1" alignment="I:1">
              <typename><typedef-ref name="uint8_t" ref="0x40218250"/></typename>
            </type-int>
          </value>
          <value cst="I:2">
            <type-int cname="int" size="I:4" alignment="I:4"></type-int>
          </value>
        </arguments>
      </instance>
      <module/>
    </component>
    <component qname="HplAtm128GeneralIOC.PortF.Bit3" loc="41(HplAtm128GeneralIOC.PortF.Bit3):/opt/tinyos-2.1.2/tos/chips/atm128/pins/sim/HplAtm128GeneralIOPinP.nc">
      <documentation loc="37:/opt/tinyos-2.1.2/tos/chips/atm128/pins/sim/HplAtm128GeneralIOPinP.nc">
        <short>&#10; Generic pin access for pins mapped into I/O space (for which the sbi, cbi&#10; instructions give atomic updates).</short>
        <long>&#10; Generic pin access for pins mapped into I/O space (for which the sbi, cbi&#10; instructions give atomic updates). This can be used for ports A-E.&#10;</long>
      </documentation>
      <instance number="43">
        <component-ref qname="HplAtm128GeneralIOPinP"/>
        <arguments>
          <value cst="U:">
            <type-int cname="unsigned char" unsigned="" size="I:1" alignment="I:1">
              <typename><typedef-ref name="uint8_t" ref="0x40218250"/></typename>
            </type-int>
          </value>
          <value cst="U:">
            <type-int cname="unsigned char" unsigned="" size="I:1" alignment="I:1">
              <typename><typedef-ref name="uint8_t" ref="0x40218250"/></typename>
            </type-int>
          </value>
          <value cst="U:">
            <type-int cname="unsigned char" unsigned="" size="I:1" alignment="I:1">
              <typename><typedef-ref name="uint8_t" ref="0x40218250"/></typename>
            </type-int>
          </value>
          <value cst="I:3">
            <type-int cname="int" size="I:4" alignment="I:4"></type-int>
          </value>
        </arguments>
      </instance>
      <module/>
    </component>
    <component qname="HplAtm128GeneralIOC.PortF.Bit4" loc="41(HplAtm128GeneralIOC.PortF.Bit4):/opt/tinyos-2.1.2/tos/chips/atm128/pins/sim/HplAtm128GeneralIOPinP.nc">
      <documentation loc="37:/opt/tinyos-2.1.2/tos/chips/atm128/pins/sim/HplAtm128GeneralIOPinP.nc">
        <short>&#10; Generic pin access for pins mapped into I/O space (for which the sbi, cbi&#10; instructions give atomic updates).</short>
        <long>&#10; Generic pin access for pins mapped into I/O space (for which the sbi, cbi&#10; instructions give atomic updates). This can be used for ports A-E.&#10;</long>
      </documentation>
      <instance number="44">
        <component-ref qname="HplAtm128GeneralIOPinP"/>
        <arguments>
          <value cst="U:">
            <type-int cname="unsigned char" unsigned="" size="I:1" alignment="I:1">
              <typename><typedef-ref name="uint8_t" ref="0x40218250"/></typename>
            </type-int>
          </value>
          <value cst="U:">
            <type-int cname="unsigned char" unsigned="" size="I:1" alignment="I:1">
              <typename><typedef-ref name="uint8_t" ref="0x40218250"/></typename>
            </type-int>
          </value>
          <value cst="U:">
            <type-int cname="unsigned char" unsigned="" size="I:1" alignment="I:1">
              <typename><typedef-ref name="uint8_t" ref="0x40218250"/></typename>
            </type-int>
          </value>
          <value cst="I:4">
            <type-int cname="int" size="I:4" alignment="I:4"></type-int>
          </value>
        </arguments>
      </instance>
      <module/>
    </component>
    <component qname="HplAtm128GeneralIOC.PortF.Bit5" loc="41(HplAtm128GeneralIOC.PortF.Bit5):/opt/tinyos-2.1.2/tos/chips/atm128/pins/sim/HplAtm128GeneralIOPinP.nc">
      <documentation loc="37:/opt/tinyos-2.1.2/tos/chips/atm128/pins/sim/HplAtm128GeneralIOPinP.nc">
        <short>&#10; Generic pin access for pins mapped into I/O space (for which the sbi, cbi&#10; instructions give atomic updates).</short>
        <long>&#10; Generic pin access for pins mapped into I/O space (for which the sbi, cbi&#10; instructions give atomic updates). This can be used for ports A-E.&#10;</long>
      </documentation>
      <instance number="45">
        <component-ref qname="HplAtm128GeneralIOPinP"/>
        <arguments>
          <value cst="U:">
            <type-int cname="unsigned char" unsigned="" size="I:1" alignment="I:1">
              <typename><typedef-ref name="uint8_t" ref="0x40218250"/></typename>
            </type-int>
          </value>
          <value cst="U:">
            <type-int cname="unsigned char" unsigned="" size="I:1" alignment="I:1">
              <typename><typedef-ref name="uint8_t" ref="0x40218250"/></typename>
            </type-int>
          </value>
          <value cst="U:">
            <type-int cname="unsigned char" unsigned="" size="I:1" alignment="I:1">
              <typename><typedef-ref name="uint8_t" ref="0x40218250"/></typename>
            </type-int>
          </value>
          <value cst="I:5">
            <type-int cname="int" size="I:4" alignment="I:4"></type-int>
          </value>
        </arguments>
      </instance>
      <module/>
    </component>
    <component qname="HplAtm128GeneralIOC.PortF.Bit6" loc="41(HplAtm128GeneralIOC.PortF.Bit6):/opt/tinyos-2.1.2/tos/chips/atm128/pins/sim/HplAtm128GeneralIOPinP.nc">
      <documentation loc="37:/opt/tinyos-2.1.2/tos/chips/atm128/pins/sim/HplAtm128GeneralIOPinP.nc">
        <short>&#10; Generic pin access for pins mapped into I/O space (for which the sbi, cbi&#10; instructions give atomic updates).</short>
        <long>&#10; Generic pin access for pins mapped into I/O space (for which the sbi, cbi&#10; instructions give atomic updates). This can be used for ports A-E.&#10;</long>
      </documentation>
      <instance number="46">
        <component-ref qname="HplAtm128GeneralIOPinP"/>
        <arguments>
          <value cst="U:">
            <type-int cname="unsigned char" unsigned="" size="I:1" alignment="I:1">
              <typename><typedef-ref name="uint8_t" ref="0x40218250"/></typename>
            </type-int>
          </value>
          <value cst="U:">
            <type-int cname="unsigned char" unsigned="" size="I:1" alignment="I:1">
              <typename><typedef-ref name="uint8_t" ref="0x40218250"/></typename>
            </type-int>
          </value>
          <value cst="U:">
            <type-int cname="unsigned char" unsigned="" size="I:1" alignment="I:1">
              <typename><typedef-ref name="uint8_t" ref="0x40218250"/></typename>
            </type-int>
          </value>
          <value cst="I:6">
            <type-int cname="int" size="I:4" alignment="I:4"></type-int>
          </value>
        </arguments>
      </instance>
      <module/>
    </component>
    <component qname="HplAtm128GeneralIOC.PortF.Bit7" loc="41(HplAtm128GeneralIOC.PortF.Bit7):/opt/tinyos-2.1.2/tos/chips/atm128/pins/sim/HplAtm128GeneralIOPinP.nc">
      <documentation loc="37:/opt/tinyos-2.1.2/tos/chips/atm128/pins/sim/HplAtm128GeneralIOPinP.nc">
        <short>&#10; Generic pin access for pins mapped into I/O space (for which the sbi, cbi&#10; instructions give atomic updates).</short>
        <long>&#10; Generic pin access for pins mapped into I/O space (for which the sbi, cbi&#10; instructions give atomic updates). This can be used for ports A-E.&#10;</long>
      </documentation>
      <instance number="47">
        <component-ref qname="HplAtm128GeneralIOPinP"/>
        <arguments>
          <value cst="U:">
            <type-int cname="unsigned char" unsigned="" size="I:1" alignment="I:1">
              <typename><typedef-ref name="uint8_t" ref="0x40218250"/></typename>
            </type-int>
          </value>
          <value cst="U:">
            <type-int cname="unsigned char" unsigned="" size="I:1" alignment="I:1">
              <typename><typedef-ref name="uint8_t" ref="0x40218250"/></typename>
            </type-int>
          </value>
          <value cst="U:">
            <type-int cname="unsigned char" unsigned="" size="I:1" alignment="I:1">
              <typename><typedef-ref name="uint8_t" ref="0x40218250"/></typename>
            </type-int>
          </value>
          <value cst="I:7">
            <type-int cname="int" size="I:4" alignment="I:4"></type-int>
          </value>
        </arguments>
      </instance>
      <module/>
    </component>
    <component qname="HplAtm128GeneralIOC.F0" loc="42(HplAtm128GeneralIOC.F0):/opt/tinyos-2.1.2/tos/chips/atm128/pins/HplAtm128GeneralIOSlowPinP.nc">
      <documentation loc="34:/opt/tinyos-2.1.2/tos/chips/atm128/pins/HplAtm128GeneralIOSlowPinP.nc">
        <short>&#10; Generic pin access for pins not mapped into I/O space (for which the&#10; sbi, cbi instructions cannot be used).</short>
        <long>&#10; Generic pin access for pins not mapped into I/O space (for which the&#10; sbi, cbi instructions cannot be used). This can be used for ports F-G.&#10;&#10; @author Martin Turon &#60;mturon@xbow.com>&#10; @author David Gay &#60;dgay@intel-research.net>&#10;</long>
      </documentation>
      <instance number="0">
        <component-ref qname="HplAtm128GeneralIOSlowPinP"/>
        <arguments>
          <value cst="I:98">
            <type-int cname="unsigned char" unsigned="" size="I:1" alignment="I:1">
              <typename><typedef-ref name="uint8_t" ref="0x40218250"/></typename>
            </type-int>
          </value>
          <value cst="I:97">
            <type-int cname="unsigned char" unsigned="" size="I:1" alignment="I:1">
              <typename><typedef-ref name="uint8_t" ref="0x40218250"/></typename>
            </type-int>
          </value>
          <value cst="I:0">
            <type-int cname="unsigned char" unsigned="" size="I:1" alignment="I:1">
              <typename><typedef-ref name="uint8_t" ref="0x40218250"/></typename>
            </type-int>
          </value>
          <value cst="I:0">
            <type-int cname="int" size="I:4" alignment="I:4"></type-int>
          </value>
        </arguments>
      </instance>
      <module/>
    </component>
    <component qname="HplAtm128GeneralIOC.F1" loc="42(HplAtm128GeneralIOC.F1):/opt/tinyos-2.1.2/tos/chips/atm128/pins/HplAtm128GeneralIOSlowPinP.nc">
      <documentation loc="34:/opt/tinyos-2.1.2/tos/chips/atm128/pins/HplAtm128GeneralIOSlowPinP.nc">
        <short>&#10; Generic pin access for pins not mapped into I/O space (for which the&#10; sbi, cbi instructions cannot be used).</short>
        <long>&#10; Generic pin access for pins not mapped into I/O space (for which the&#10; sbi, cbi instructions cannot be used). This can be used for ports F-G.&#10;&#10; @author Martin Turon &#60;mturon@xbow.com>&#10; @author David Gay &#60;dgay@intel-research.net>&#10;</long>
      </documentation>
      <instance number="1">
        <component-ref qname="HplAtm128GeneralIOSlowPinP"/>
        <arguments>
          <value cst="I:98">
            <type-int cname="unsigned char" unsigned="" size="I:1" alignment="I:1">
              <typename><typedef-ref name="uint8_t" ref="0x40218250"/></typename>
            </type-int>
          </value>
          <value cst="I:97">
            <type-int cname="unsigned char" unsigned="" size="I:1" alignment="I:1">
              <typename><typedef-ref name="uint8_t" ref="0x40218250"/></typename>
            </type-int>
          </value>
          <value cst="I:0">
            <type-int cname="unsigned char" unsigned="" size="I:1" alignment="I:1">
              <typename><typedef-ref name="uint8_t" ref="0x40218250"/></typename>
            </type-int>
          </value>
          <value cst="I:1">
            <type-int cname="int" size="I:4" alignment="I:4"></type-int>
          </value>
        </arguments>
      </instance>
      <module/>
    </component>
    <component qname="HplAtm128GeneralIOC.F2" loc="42(HplAtm128GeneralIOC.F2):/opt/tinyos-2.1.2/tos/chips/atm128/pins/HplAtm128GeneralIOSlowPinP.nc">
      <documentation loc="34:/opt/tinyos-2.1.2/tos/chips/atm128/pins/HplAtm128GeneralIOSlowPinP.nc">
        <short>&#10; Generic pin access for pins not mapped into I/O space (for which the&#10; sbi, cbi instructions cannot be used).</short>
        <long>&#10; Generic pin access for pins not mapped into I/O space (for which the&#10; sbi, cbi instructions cannot be used). This can be used for ports F-G.&#10;&#10; @author Martin Turon &#60;mturon@xbow.com>&#10; @author David Gay &#60;dgay@intel-research.net>&#10;</long>
      </documentation>
      <instance number="2">
        <component-ref qname="HplAtm128GeneralIOSlowPinP"/>
        <arguments>
          <value cst="I:98">
            <type-int cname="unsigned char" unsigned="" size="I:1" alignment="I:1">
              <typename><typedef-ref name="uint8_t" ref="0x40218250"/></typename>
            </type-int>
          </value>
          <value cst="I:97">
            <type-int cname="unsigned char" unsigned="" size="I:1" alignment="I:1">
              <typename><typedef-ref name="uint8_t" ref="0x40218250"/></typename>
            </type-int>
          </value>
          <value cst="I:0">
            <type-int cname="unsigned char" unsigned="" size="I:1" alignment="I:1">
              <typename><typedef-ref name="uint8_t" ref="0x40218250"/></typename>
            </type-int>
          </value>
          <value cst="I:2">
            <type-int cname="int" size="I:4" alignment="I:4"></type-int>
          </value>
        </arguments>
      </instance>
      <module/>
    </component>
    <component qname="HplAtm128GeneralIOC.F3" loc="42(HplAtm128GeneralIOC.F3):/opt/tinyos-2.1.2/tos/chips/atm128/pins/HplAtm128GeneralIOSlowPinP.nc">
      <documentation loc="34:/opt/tinyos-2.1.2/tos/chips/atm128/pins/HplAtm128GeneralIOSlowPinP.nc">
        <short>&#10; Generic pin access for pins not mapped into I/O space (for which the&#10; sbi, cbi instructions cannot be used).</short>
        <long>&#10; Generic pin access for pins not mapped into I/O space (for which the&#10; sbi, cbi instructions cannot be used). This can be used for ports F-G.&#10;&#10; @author Martin Turon &#60;mturon@xbow.com>&#10; @author David Gay &#60;dgay@intel-research.net>&#10;</long>
      </documentation>
      <instance number="3">
        <component-ref qname="HplAtm128GeneralIOSlowPinP"/>
        <arguments>
          <value cst="I:98">
            <type-int cname="unsigned char" unsigned="" size="I:1" alignment="I:1">
              <typename><typedef-ref name="uint8_t" ref="0x40218250"/></typename>
            </type-int>
          </value>
          <value cst="I:97">
            <type-int cname="unsigned char" unsigned="" size="I:1" alignment="I:1">
              <typename><typedef-ref name="uint8_t" ref="0x40218250"/></typename>
            </type-int>
          </value>
          <value cst="I:0">
            <type-int cname="unsigned char" unsigned="" size="I:1" alignment="I:1">
              <typename><typedef-ref name="uint8_t" ref="0x40218250"/></typename>
            </type-int>
          </value>
          <value cst="I:3">
            <type-int cname="int" size="I:4" alignment="I:4"></type-int>
          </value>
        </arguments>
      </instance>
      <module/>
    </component>
    <component qname="HplAtm128GeneralIOC.F4" loc="42(HplAtm128GeneralIOC.F4):/opt/tinyos-2.1.2/tos/chips/atm128/pins/HplAtm128GeneralIOSlowPinP.nc">
      <documentation loc="34:/opt/tinyos-2.1.2/tos/chips/atm128/pins/HplAtm128GeneralIOSlowPinP.nc">
        <short>&#10; Generic pin access for pins not mapped into I/O space (for which the&#10; sbi, cbi instructions cannot be used).</short>
        <long>&#10; Generic pin access for pins not mapped into I/O space (for which the&#10; sbi, cbi instructions cannot be used). This can be used for ports F-G.&#10;&#10; @author Martin Turon &#60;mturon@xbow.com>&#10; @author David Gay &#60;dgay@intel-research.net>&#10;</long>
      </documentation>
      <instance number="4">
        <component-ref qname="HplAtm128GeneralIOSlowPinP"/>
        <arguments>
          <value cst="I:98">
            <type-int cname="unsigned char" unsigned="" size="I:1" alignment="I:1">
              <typename><typedef-ref name="uint8_t" ref="0x40218250"/></typename>
            </type-int>
          </value>
          <value cst="I:97">
            <type-int cname="unsigned char" unsigned="" size="I:1" alignment="I:1">
              <typename><typedef-ref name="uint8_t" ref="0x40218250"/></typename>
            </type-int>
          </value>
          <value cst="I:0">
            <type-int cname="unsigned char" unsigned="" size="I:1" alignment="I:1">
              <typename><typedef-ref name="uint8_t" ref="0x40218250"/></typename>
            </type-int>
          </value>
          <value cst="I:4">
            <type-int cname="int" size="I:4" alignment="I:4"></type-int>
          </value>
        </arguments>
      </instance>
      <module/>
    </component>
    <component qname="HplAtm128GeneralIOC.F5" loc="42(HplAtm128GeneralIOC.F5):/opt/tinyos-2.1.2/tos/chips/atm128/pins/HplAtm128GeneralIOSlowPinP.nc">
      <documentation loc="34:/opt/tinyos-2.1.2/tos/chips/atm128/pins/HplAtm128GeneralIOSlowPinP.nc">
        <short>&#10; Generic pin access for pins not mapped into I/O space (for which the&#10; sbi, cbi instructions cannot be used).</short>
        <long>&#10; Generic pin access for pins not mapped into I/O space (for which the&#10; sbi, cbi instructions cannot be used). This can be used for ports F-G.&#10;&#10; @author Martin Turon &#60;mturon@xbow.com>&#10; @author David Gay &#60;dgay@intel-research.net>&#10;</long>
      </documentation>
      <instance number="5">
        <component-ref qname="HplAtm128GeneralIOSlowPinP"/>
        <arguments>
          <value cst="I:98">
            <type-int cname="unsigned char" unsigned="" size="I:1" alignment="I:1">
              <typename><typedef-ref name="uint8_t" ref="0x40218250"/></typename>
            </type-int>
          </value>
          <value cst="I:97">
            <type-int cname="unsigned char" unsigned="" size="I:1" alignment="I:1">
              <typename><typedef-ref name="uint8_t" ref="0x40218250"/></typename>
            </type-int>
          </value>
          <value cst="I:0">
            <type-int cname="unsigned char" unsigned="" size="I:1" alignment="I:1">
              <typename><typedef-ref name="uint8_t" ref="0x40218250"/></typename>
            </type-int>
          </value>
          <value cst="I:5">
            <type-int cname="int" size="I:4" alignment="I:4"></type-int>
          </value>
        </arguments>
      </instance>
      <module/>
    </component>
    <component qname="HplAtm128GeneralIOC.F6" loc="42(HplAtm128GeneralIOC.F6):/opt/tinyos-2.1.2/tos/chips/atm128/pins/HplAtm128GeneralIOSlowPinP.nc">
      <documentation loc="34:/opt/tinyos-2.1.2/tos/chips/atm128/pins/HplAtm128GeneralIOSlowPinP.nc">
        <short>&#10; Generic pin access for pins not mapped into I/O space (for which the&#10; sbi, cbi instructions cannot be used).</short>
        <long>&#10; Generic pin access for pins not mapped into I/O space (for which the&#10; sbi, cbi instructions cannot be used). This can be used for ports F-G.&#10;&#10; @author Martin Turon &#60;mturon@xbow.com>&#10; @author David Gay &#60;dgay@intel-research.net>&#10;</long>
      </documentation>
      <instance number="6">
        <component-ref qname="HplAtm128GeneralIOSlowPinP"/>
        <arguments>
          <value cst="I:98">
            <type-int cname="unsigned char" unsigned="" size="I:1" alignment="I:1">
              <typename><typedef-ref name="uint8_t" ref="0x40218250"/></typename>
            </type-int>
          </value>
          <value cst="I:97">
            <type-int cname="unsigned char" unsigned="" size="I:1" alignment="I:1">
              <typename><typedef-ref name="uint8_t" ref="0x40218250"/></typename>
            </type-int>
          </value>
          <value cst="I:0">
            <type-int cname="unsigned char" unsigned="" size="I:1" alignment="I:1">
              <typename><typedef-ref name="uint8_t" ref="0x40218250"/></typename>
            </type-int>
          </value>
          <value cst="I:6">
            <type-int cname="int" size="I:4" alignment="I:4"></type-int>
          </value>
        </arguments>
      </instance>
      <module/>
    </component>
    <component qname="HplAtm128GeneralIOC.F7" loc="42(HplAtm128GeneralIOC.F7):/opt/tinyos-2.1.2/tos/chips/atm128/pins/HplAtm128GeneralIOSlowPinP.nc">
      <documentation loc="34:/opt/tinyos-2.1.2/tos/chips/atm128/pins/HplAtm128GeneralIOSlowPinP.nc">
        <short>&#10; Generic pin access for pins not mapped into I/O space (for which the&#10; sbi, cbi instructions cannot be used).</short>
        <long>&#10; Generic pin access for pins not mapped into I/O space (for which the&#10; sbi, cbi instructions cannot be used). This can be used for ports F-G.&#10;&#10; @author Martin Turon &#60;mturon@xbow.com>&#10; @author David Gay &#60;dgay@intel-research.net>&#10;</long>
      </documentation>
      <instance number="7">
        <component-ref qname="HplAtm128GeneralIOSlowPinP"/>
        <arguments>
          <value cst="I:98">
            <type-int cname="unsigned char" unsigned="" size="I:1" alignment="I:1">
              <typename><typedef-ref name="uint8_t" ref="0x40218250"/></typename>
            </type-int>
          </value>
          <value cst="I:97">
            <type-int cname="unsigned char" unsigned="" size="I:1" alignment="I:1">
              <typename><typedef-ref name="uint8_t" ref="0x40218250"/></typename>
            </type-int>
          </value>
          <value cst="I:0">
            <type-int cname="unsigned char" unsigned="" size="I:1" alignment="I:1">
              <typename><typedef-ref name="uint8_t" ref="0x40218250"/></typename>
            </type-int>
          </value>
          <value cst="I:7">
            <type-int cname="int" size="I:4" alignment="I:4"></type-int>
          </value>
        </arguments>
      </instance>
      <module/>
    </component>
    <component qname="HplAtm128GeneralIOC.G0" loc="42(HplAtm128GeneralIOC.G0):/opt/tinyos-2.1.2/tos/chips/atm128/pins/HplAtm128GeneralIOSlowPinP.nc">
      <documentation loc="34:/opt/tinyos-2.1.2/tos/chips/atm128/pins/HplAtm128GeneralIOSlowPinP.nc">
        <short>&#10; Generic pin access for pins not mapped into I/O space (for which the&#10; sbi, cbi instructions cannot be used).</short>
        <long>&#10; Generic pin access for pins not mapped into I/O space (for which the&#10; sbi, cbi instructions cannot be used). This can be used for ports F-G.&#10;&#10; @author Martin Turon &#60;mturon@xbow.com>&#10; @author David Gay &#60;dgay@intel-research.net>&#10;</long>
      </documentation>
      <instance number="8">
        <component-ref qname="HplAtm128GeneralIOSlowPinP"/>
        <arguments>
          <value cst="I:101">
            <type-int cname="unsigned char" unsigned="" size="I:1" alignment="I:1">
              <typename><typedef-ref name="uint8_t" ref="0x40218250"/></typename>
            </type-int>
          </value>
          <value cst="I:100">
            <type-int cname="unsigned char" unsigned="" size="I:1" alignment="I:1">
              <typename><typedef-ref name="uint8_t" ref="0x40218250"/></typename>
            </type-int>
          </value>
          <value cst="I:99">
            <type-int cname="unsigned char" unsigned="" size="I:1" alignment="I:1">
              <typename><typedef-ref name="uint8_t" ref="0x40218250"/></typename>
            </type-int>
          </value>
          <value cst="I:0">
            <type-int cname="int" size="I:4" alignment="I:4"></type-int>
          </value>
        </arguments>
      </instance>
      <module/>
    </component>
    <component qname="HplAtm128GeneralIOC.G1" loc="42(HplAtm128GeneralIOC.G1):/opt/tinyos-2.1.2/tos/chips/atm128/pins/HplAtm128GeneralIOSlowPinP.nc">
      <documentation loc="34:/opt/tinyos-2.1.2/tos/chips/atm128/pins/HplAtm128GeneralIOSlowPinP.nc">
        <short>&#10; Generic pin access for pins not mapped into I/O space (for which the&#10; sbi, cbi instructions cannot be used).</short>
        <long>&#10; Generic pin access for pins not mapped into I/O space (for which the&#10; sbi, cbi instructions cannot be used). This can be used for ports F-G.&#10;&#10; @author Martin Turon &#60;mturon@xbow.com>&#10; @author David Gay &#60;dgay@intel-research.net>&#10;</long>
      </documentation>
      <instance number="9">
        <component-ref qname="HplAtm128GeneralIOSlowPinP"/>
        <arguments>
          <value cst="I:101">
            <type-int cname="unsigned char" unsigned="" size="I:1" alignment="I:1">
              <typename><typedef-ref name="uint8_t" ref="0x40218250"/></typename>
            </type-int>
          </value>
          <value cst="I:100">
            <type-int cname="unsigned char" unsigned="" size="I:1" alignment="I:1">
              <typename><typedef-ref name="uint8_t" ref="0x40218250"/></typename>
            </type-int>
          </value>
          <value cst="I:99">
            <type-int cname="unsigned char" unsigned="" size="I:1" alignment="I:1">
              <typename><typedef-ref name="uint8_t" ref="0x40218250"/></typename>
            </type-int>
          </value>
          <value cst="I:1">
            <type-int cname="int" size="I:4" alignment="I:4"></type-int>
          </value>
        </arguments>
      </instance>
      <module/>
    </component>
    <component qname="HplAtm128GeneralIOC.G2" loc="42(HplAtm128GeneralIOC.G2):/opt/tinyos-2.1.2/tos/chips/atm128/pins/HplAtm128GeneralIOSlowPinP.nc">
      <documentation loc="34:/opt/tinyos-2.1.2/tos/chips/atm128/pins/HplAtm128GeneralIOSlowPinP.nc">
        <short>&#10; Generic pin access for pins not mapped into I/O space (for which the&#10; sbi, cbi instructions cannot be used).</short>
        <long>&#10; Generic pin access for pins not mapped into I/O space (for which the&#10; sbi, cbi instructions cannot be used). This can be used for ports F-G.&#10;&#10; @author Martin Turon &#60;mturon@xbow.com>&#10; @author David Gay &#60;dgay@intel-research.net>&#10;</long>
      </documentation>
      <instance number="10">
        <component-ref qname="HplAtm128GeneralIOSlowPinP"/>
        <arguments>
          <value cst="I:101">
            <type-int cname="unsigned char" unsigned="" size="I:1" alignment="I:1">
              <typename><typedef-ref name="uint8_t" ref="0x40218250"/></typename>
            </type-int>
          </value>
          <value cst="I:100">
            <type-int cname="unsigned char" unsigned="" size="I:1" alignment="I:1">
              <typename><typedef-ref name="uint8_t" ref="0x40218250"/></typename>
            </type-int>
          </value>
          <value cst="I:99">
            <type-int cname="unsigned char" unsigned="" size="I:1" alignment="I:1">
              <typename><typedef-ref name="uint8_t" ref="0x40218250"/></typename>
            </type-int>
          </value>
          <value cst="I:2">
            <type-int cname="int" size="I:4" alignment="I:4"></type-int>
          </value>
        </arguments>
      </instance>
      <module/>
    </component>
    <component qname="HplAtm128GeneralIOC.G3" loc="42(HplAtm128GeneralIOC.G3):/opt/tinyos-2.1.2/tos/chips/atm128/pins/HplAtm128GeneralIOSlowPinP.nc">
      <documentation loc="34:/opt/tinyos-2.1.2/tos/chips/atm128/pins/HplAtm128GeneralIOSlowPinP.nc">
        <short>&#10; Generic pin access for pins not mapped into I/O space (for which the&#10; sbi, cbi instructions cannot be used).</short>
        <long>&#10; Generic pin access for pins not mapped into I/O space (for which the&#10; sbi, cbi instructions cannot be used). This can be used for ports F-G.&#10;&#10; @author Martin Turon &#60;mturon@xbow.com>&#10; @author David Gay &#60;dgay@intel-research.net>&#10;</long>
      </documentation>
      <instance number="11">
        <component-ref qname="HplAtm128GeneralIOSlowPinP"/>
        <arguments>
          <value cst="I:101">
            <type-int cname="unsigned char" unsigned="" size="I:1" alignment="I:1">
              <typename><typedef-ref name="uint8_t" ref="0x40218250"/></typename>
            </type-int>
          </value>
          <value cst="I:100">
            <type-int cname="unsigned char" unsigned="" size="I:1" alignment="I:1">
              <typename><typedef-ref name="uint8_t" ref="0x40218250"/></typename>
            </type-int>
          </value>
          <value cst="I:99">
            <type-int cname="unsigned char" unsigned="" size="I:1" alignment="I:1">
              <typename><typedef-ref name="uint8_t" ref="0x40218250"/></typename>
            </type-int>
          </value>
          <value cst="I:3">
            <type-int cname="int" size="I:4" alignment="I:4"></type-int>
          </value>
        </arguments>
      </instance>
      <module/>
    </component>
    <component qname="HplAtm128GeneralIOC.G4" loc="42(HplAtm128GeneralIOC.G4):/opt/tinyos-2.1.2/tos/chips/atm128/pins/HplAtm128GeneralIOSlowPinP.nc">
      <documentation loc="34:/opt/tinyos-2.1.2/tos/chips/atm128/pins/HplAtm128GeneralIOSlowPinP.nc">
        <short>&#10; Generic pin access for pins not mapped into I/O space (for which the&#10; sbi, cbi instructions cannot be used).</short>
        <long>&#10; Generic pin access for pins not mapped into I/O space (for which the&#10; sbi, cbi instructions cannot be used). This can be used for ports F-G.&#10;&#10; @author Martin Turon &#60;mturon@xbow.com>&#10; @author David Gay &#60;dgay@intel-research.net>&#10;</long>
      </documentation>
      <instance number="12">
        <component-ref qname="HplAtm128GeneralIOSlowPinP"/>
        <arguments>
          <value cst="I:101">
            <type-int cname="unsigned char" unsigned="" size="I:1" alignment="I:1">
              <typename><typedef-ref name="uint8_t" ref="0x40218250"/></typename>
            </type-int>
          </value>
          <value cst="I:100">
            <type-int cname="unsigned char" unsigned="" size="I:1" alignment="I:1">
              <typename><typedef-ref name="uint8_t" ref="0x40218250"/></typename>
            </type-int>
          </value>
          <value cst="I:99">
            <type-int cname="unsigned char" unsigned="" size="I:1" alignment="I:1">
              <typename><typedef-ref name="uint8_t" ref="0x40218250"/></typename>
            </type-int>
          </value>
          <value cst="I:4">
            <type-int cname="int" size="I:4" alignment="I:4"></type-int>
          </value>
        </arguments>
      </instance>
      <module/>
    </component>
    <component qname="MeasureClockC" loc="10:/opt/tinyos-2.1.2/tos/platforms/mica/sim/MeasureClockC.nc">
      <documentation loc="3:/opt/tinyos-2.1.2/tos/platforms/mica/sim/MeasureClockC.nc">
        <short>&#10; Simulation version of MeasureClockC for the mica platform.</short>
        <long>&#10; Simulation version of MeasureClockC for the mica platform. See &#10; tos/platforms/mica/MeasureClockC.nc for more details.&#10;&#10; @author Phil Levis&#10;</long>
      </documentation>
      <module/>
    </component>
    <component qname="SimMainP" loc="43:/opt/tinyos-2.1.2/tos/lib/tossim/SimMainP.nc">
      <module/>
    </component>
    <component qname="TinySchedulerC" loc="42:/opt/tinyos-2.1.2/tos/lib/tossim/TinySchedulerC.nc">
      <documentation loc="32:/opt/tinyos-2.1.2/tos/lib/tossim/TinySchedulerC.nc">
        <short>&#10; TOSSIM-specific scheduler implementation, which models&#10; tasks as simulation events (in order to capture delay).</short>
        <long>&#10; TOSSIM-specific scheduler implementation, which models&#10; tasks as simulation events (in order to capture delay).&#10;&#10; @author Philip Levis&#10; @date   Nov 22 2005&#10;</long>
      </documentation>
      <configuration/>
    </component>
    <component qname="SimSchedulerBasicP" loc="47:/opt/tinyos-2.1.2/tos/lib/tossim/SimSchedulerBasicP.nc">
      <documentation loc="33:/opt/tinyos-2.1.2/tos/lib/tossim/sim_event_queue.h">
        <short>&#10; The event queue is the core of the mote side of TOSSIM.</short>
        <long>&#10; The event queue is the core of the mote side of TOSSIM. It is a&#10; wrapper around the underlying heap. Unlike the 1.x version, it is&#10; not re-entrant: merging the Python console and TOSSIM means that&#10; functionality like packet injection/reception from external tools&#10; is on the Python side.&#10;&#10; @author Phil Levis&#10; @date   November 22 2005&#10;</long>
      </documentation>
      <module/>
    </component>
    <component qname="SimMoteP" loc="45:/opt/tinyos-2.1.2/tos/lib/tossim/SimMoteP.nc">
      <documentation loc="33:/opt/tinyos-2.1.2/tos/lib/tossim/SimMoteP.nc">
        <short>&#10; The TOSSIM abstraction of a mote.</short>
        <long>&#10; The TOSSIM abstraction of a mote. By putting simulation state into&#10; a component, we can scale and reference this state automatically&#10; using nesC's rewriting, rather than managing and indexing into&#10; arrays manually.&#10;&#10; @author Phil Levis&#10; @date   August 19 2005&#10;</long>
      </documentation>
      <module/>
    </component>
    <component qname="ActiveMessageC" loc="42:/opt/tinyos-2.1.2/tos/lib/tossim/ActiveMessageC.nc">
      <documentation loc="33:/opt/tinyos-2.1.2/tos/lib/tossim/ActiveMessageC.nc">
        <short>&#10;&#10; The basic chip-independent TOSSIM Active Message layer for radio chips&#10; that do not have simulation support.</short>
        <long>&#10;&#10; The basic chip-independent TOSSIM Active Message layer for radio chips&#10; that do not have simulation support.&#10;&#10; @author Philip Levis&#10; @date December 2 2005&#10;</long>
      </documentation>
      <configuration/>
    </component>
    <component qname="TossimActiveMessageC" loc="44:/opt/tinyos-2.1.2/tos/lib/tossim/TossimActiveMessageC.nc">
      <documentation loc="33:/opt/tinyos-2.1.2/tos/lib/tossim/TossimActiveMessageC.nc">
        <short>&#10;&#10; The basic chip-independent TOSSIM Active Message layer for radio chips&#10; that do not have simulation support.</short>
        <long>&#10;&#10; The basic chip-independent TOSSIM Active Message layer for radio chips&#10; that do not have simulation support.&#10;&#10; @author Philip Levis&#10; @date December 2 2005&#10;</long>
      </documentation>
      <module/>
    </component>
    <component qname="TossimPacketModelC" loc="60:/opt/tinyos-2.1.2/tos/lib/tossim/TossimPacketModelC.nc">
      <documentation loc="32:/opt/tinyos-2.1.2/tos/lib/tossim/sim_csma.h">
        <short>&#10;&#10; Configuration parameters for a CSMA link.</short>
        <long>&#10;&#10; Configuration parameters for a CSMA link.&#10;&#10; @author Philip Levis&#10; @date   Dec 10 2005&#10;</long>
      </documentation>
      <module/>
    </component>
    <component qname="CpmModelC" loc="52:/opt/tinyos-2.1.2/tos/lib/tossim/CpmModelC.nc">
      <documentation loc="32:/opt/tinyos-2.1.2/tos/lib/tossim/sim_noise.h">
        <short>&#10; Implementation of all of the SNIST primitives and utility&#10; functions.</short>
        <long>&#10; Implementation of all of the SNIST primitives and utility&#10; functions.&#10;&#10; @author Hyungjune Lee&#10; @date   Oct 13 2006&#10;</long>
      </documentation>
      <module/>
    </component>
    <component qname="ActiveMessageAddressC" loc="57:/opt/tinyos-2.1.2/tos/lib/tossim/ActiveMessageAddressC.nc">
      <documentation loc="49:/opt/tinyos-2.1.2/tos/lib/tossim/ActiveMessageAddressC.nc">
        <short>&#10; Accessor methods for Active Messages.</short>
        <long>&#10; Accessor methods for Active Messages.&#10;&#10; @author Philip Levis&#10; @author Morten Tranberg Hansen (added ActiveMessageAddress)&#10; @date June 19 2005&#10;</long>
      </documentation>
      <module/>
    </component>
    <component qname="LedsC" loc="45:/opt/tinyos-2.1.2/tos/system/LedsC.nc">
      <documentation loc="34:/opt/tinyos-2.1.2/tos/system/LedsC.nc">
        <short>&#10;&#10; The basic TinyOS LEDs abstraction.</short>
        <long>&#10;&#10; The basic TinyOS LEDs abstraction.&#10;&#10; @author Phil Buonadonna&#10; @author David Gay&#10; @author Philip Levis&#10; @author Joe Polastre&#10;</long>
      </documentation>
      <configuration/>
    </component>
    <component qname="LedsP" loc="44:/opt/tinyos-2.1.2/tos/system/LedsP.nc" safe="">
      <documentation loc="35:/opt/tinyos-2.1.2/tos/system/LedsP.nc">
        <short>&#10; The implementation of the standard 3 LED mote abstraction.</short>
        <long>&#10; The implementation of the standard 3 LED mote abstraction.&#10;&#10; @author Joe Polastre&#10; @author Philip Levis&#10;&#10; @date   March 21, 2005&#10;</long>
      </documentation>
      <module/>
    </component>
    <component qname="PlatformLedsC" loc="42:/opt/tinyos-2.1.2/tos/platforms/mica/PlatformLedsC.nc">
      <documentation loc="1:/opt/tinyos-2.1.2/tos/platforms/micaz/sim/platform_hardware.h">
        <short>                                                                     &#10;  IMPORTANT: READ BEFORE DOWNLOADING, COPYING, INSTALLING OR USING.</short>
        <long>                                                                     &#10;  IMPORTANT: READ BEFORE DOWNLOADING, COPYING, INSTALLING OR USING.  By&#10;  downloading, copying, installing or using the software you agree to&#10;  this license.  If you do not agree to this license, do not download,&#10;  install, copy or use the software.&#10;&#10;  Copyright (c) 2004-2005 Crossbow Technology, Inc.&#10;  Copyright (c) 2002-2003 Intel Corporation.&#10;  Copyright (c) 2000-2003 The Regents of the University  of California.    &#10;  All rights reserved.&#10;&#10; Redistribution and use in source and binary forms, with or without&#10; modification, are permitted provided that the following conditions&#10; are met:&#10;&#10; - Redistributions of source code must retain the above copyright&#10;   notice, this list of conditions and the following disclaimer.&#10; - Redistributions in binary form must reproduce the above copyright&#10;   notice, this list of conditions and the following disclaimer in the&#10;   documentation and/or other materials provided with the&#10;   distribution.&#10; - Neither the name of the copyright holder nor the names of&#10;   its contributors may be used to endorse or promote products derived&#10;   from this software without specific prior written permission.&#10;&#10; THIS SOFTWARE IS PROVIDED BY THE COPYRIGHT HOLDERS AND CONTRIBUTORS&#10; &#34;AS IS&#34; AND ANY EXPRESS OR IMPLIED WARRANTIES, INCLUDING, BUT NOT&#10; LIMITED TO, THE IMPLIED WARRANTIES OF MERCHANTABILITY AND FITNESS&#10; FOR A PARTICULAR PURPOSE ARE DISCLAIMED.  IN NO EVENT SHALL&#10; THE COPYRIGHT HOLDER OR CONTRIBUTORS BE LIABLE FOR ANY DIRECT,&#10; INDIRECT, INCIDENTAL, SPECIAL, EXEMPLARY, OR CONSEQUENTIAL DAMAGES&#10; (INCLUDING, BUT NOT LIMITED TO, PROCUREMENT OF SUBSTITUTE GOODS OR&#10; SERVICES; LOSS OF USE, DATA, OR PROFITS; OR BUSINESS INTERRUPTION)&#10; HOWEVER CAUSED AND ON ANY THEORY OF LIABILITY, WHETHER IN CONTRACT,&#10; STRICT LIABILITY, OR TORT (INCLUDING NEGLIGENCE OR OTHERWISE)&#10; ARISING IN ANY WAY OUT OF THE USE OF THIS SOFTWARE, EVEN IF ADVISED&#10; OF THE POSSIBILITY OF SUCH DAMAGE.&#10;&#10;  @author Jason Hill, Philip Levis, Nelson Lee, David Gay&#10;  @author Alan Broad &#60;abroad@xbow.com>&#10;  @author Matt Miller &#60;mmiller@xbow.com>&#10;  @author Martin Turon &#60;mturon@xbow.com>&#10;&#10;  $Id: platform_hardware.h,v 1.6 2010-06-29 22:07:54 scipio Exp $&#10;</long>
      </documentation>
      <configuration/>
    </component>
    <component qname="NetworkC" loc="7:NetworkC.nc">
      <module/>
    </component>
    <component qname="NetworkAppC.Timer0" loc="44(NetworkAppC.Timer0):/opt/tinyos-2.1.2/tos/system/TimerMilliC.nc">
      <documentation loc="33:/opt/tinyos-2.1.2/tos/system/TimerMilliC.nc">
        <short>&#10; The virtualized millisecond timer abstraction.</short>
        <long>&#10; The virtualized millisecond timer abstraction. Instantiating this &#10; component gives an independent millisecond granularity timer.&#10;&#10; @author Philip Levis&#10; @date   January 16 2006&#10; @see    TEP 102: Timers&#10;</long>
      </documentation>
      <instance number="0">
        <component-ref qname="TimerMilliC"/>
      </instance>
      <configuration/>
    </component>
    <component qname="TimerMilliP" loc="48:/opt/tinyos-2.1.2/tos/system/TimerMilliP.nc">
      <documentation loc="34:/opt/tinyos-2.1.2/tos/system/TimerMilliP.nc">
        <short>&#10; Components should never wire to this component.</short>
        <long>&#10; Components should never wire to this component. This is the&#10; underlying configuration of virtualized millisecond timers. &#10; It auto-wires wires the timer&#10; implementation (TimerC) to the boot sequence and exports the&#10; various Timer interfaces.&#10;&#10; @author Philip Levis&#10; @author Cory Sharp&#10; @date   May 16 2005&#10;</long>
      </documentation>
      <configuration/>
    </component>
    <component qname="HilTimerMilliC" loc="44:/opt/tinyos-2.1.2/tos/platforms/mica/sim/HilTimerMilliC.nc">
      <documentation loc="34:/opt/tinyos-2.1.2/tos/platforms/mica/sim/HilTimerMilliC.nc">
        <short>&#10; Millisecond timer for the mica family (see TEP102).</short>
        <long>&#10; Millisecond timer for the mica family (see TEP102). The &#34;millisecond&#34;&#10; timer system is built on hardware timer 0, running at 1024Hz.&#10;&#10; @author Cory Sharp &#60;cssharp@eecs.berkeley.edu>&#10; @author Martin Turon &#60;mturon@xbow.com>&#10;</long>
      </documentation>
      <configuration/>
    </component>
    <component qname="AlarmCounterMilliP" loc="25:/opt/tinyos-2.1.2/tos/platforms/mica/AlarmCounterMilliP.nc">
      <configuration/>
    </component>
    <component qname="AlarmCounterMilliP.Atm128AlarmAsyncC" loc="23(AlarmCounterMilliP.Atm128AlarmAsyncC):/opt/tinyos-2.1.2/tos/chips/atm128/timer/Atm128AlarmAsyncC.nc">
      <documentation loc="11:/opt/tinyos-2.1.2/tos/chips/atm128/timer/Atm128AlarmAsyncC.nc">
        <short>&#10; Build a 32-bit alarm and counter from the atmega128's 8-bit timer 0&#10; in asynchronous mode.</short>
        <long>&#10; Build a 32-bit alarm and counter from the atmega128's 8-bit timer 0&#10; in asynchronous mode. Attempting to use the generic Atm128AlarmC&#10; component and the generic timer components runs into problems&#10; apparently related to letting timer 0 overflow.&#10; &#10; So, instead, this version (inspired by the 1.x code and a remark from&#10; Martin Turon) directly builds a 32-bit alarm and counter on top of timer 0&#10; and never lets timer 0 overflow.&#10;&#10; @author David Gay&#10;</long>
      </documentation>
      <instance number="0">
        <component-ref qname="Atm128AlarmAsyncC"/>
        <arguments>
          <type-tag size="I:4" alignment="I:4"><struct-ref ref="0x4020ca70"/>
            <typename><typedef-ref name="TMilli" ref="0x4020cc38"/></typename>
          </type-tag>
          <value cst="I:3">
            <type-int cname="int" size="I:4" alignment="I:4"></type-int>
          </value>
        </arguments>
      </instance>
      <configuration/>
    </component>
    <component qname="AlarmCounterMilliP.Atm128AlarmAsyncC.Atm128AlarmAsyncP" loc="23(AlarmCounterMilliP.Atm128AlarmAsyncC.Atm128AlarmAsyncP):/opt/tinyos-2.1.2/tos/chips/atm128/timer/Atm128AlarmAsyncP.nc">
      <documentation loc="11:/opt/tinyos-2.1.2/tos/chips/atm128/timer/Atm128AlarmAsyncP.nc">
        <short>&#10; Build a 32-bit alarm and counter from the atmega128's 8-bit timer 0&#10; in asynchronous mode.</short>
        <long>&#10; Build a 32-bit alarm and counter from the atmega128's 8-bit timer 0&#10; in asynchronous mode. Attempting to use the generic Atm128AlarmC&#10; component and the generic timer components runs into problems&#10; apparently related to letting timer 0 overflow.&#10; &#10; So, instead, this version (inspired by the 1.x code and a remark from&#10; Martin Turon) directly builds a 32-bit alarm and counter on top of timer 0&#10; and never lets timer 0 overflow.&#10;&#10; @author David Gay&#10;</long>
      </documentation>
      <instance number="0">
        <component-ref qname="Atm128AlarmAsyncP"/>
        <arguments>
          <type-var size="U:" alignment="U:"><typedef-ref name="precision" scoped="" ref="0x40a2f908"/></type-var>
          <value cst="U:">
            <type-int cname="int" size="I:4" alignment="I:4"></type-int>
          </value>
        </arguments>
      </instance>
      <module/>
    </component>
    <component qname="HplAtm128Timer0AsyncC" loc="50:/opt/tinyos-2.1.2/tos/chips/atm128/timer/sim/HplAtm128Timer0AsyncC.nc">
      <documentation loc="32:/opt/tinyos-2.1.2/tos/chips/atm128/timer/sim/HplAtm128Timer0AsyncC.nc">
        <short>&#10; The TOSSIM implementation of the Atm128 Timer0.</short>
        <long>&#10; The TOSSIM implementation of the Atm128 Timer0. It is built from a&#10; timer-specific counter component and a generic compare&#10; component. The counter component has an additional simulation-only&#10; interface to let the compare component know when its state has&#10; changed (e.g., TCNTX was set).&#10;&#10; @date November 22 2005&#10;&#10; @author Philip Levis &#60;pal@cs.stanford.edu>&#10; @author Martin Turon &#60;mturon@xbow.com>&#10; @author David Gay &#60;dgay@intel-research.net>&#10;</long>
      </documentation>
      <configuration/>
    </component>
    <component qname="HplAtm128Timer0AsyncP" loc="48:/opt/tinyos-2.1.2/tos/chips/atm128/timer/sim/HplAtm128Timer0AsyncP.nc">
      <documentation loc="1:/opt/tinyos-2.1.2/tos/platforms/micaz/sim/platform_hardware.h">
        <short>                                                                     &#10;  IMPORTANT: READ BEFORE DOWNLOADING, COPYING, INSTALLING OR USING.</short>
        <long>                                                                     &#10;  IMPORTANT: READ BEFORE DOWNLOADING, COPYING, INSTALLING OR USING.  By&#10;  downloading, copying, installing or using the software you agree to&#10;  this license.  If you do not agree to this license, do not download,&#10;  install, copy or use the software.&#10;&#10;  Copyright (c) 2004-2005 Crossbow Technology, Inc.&#10;  Copyright (c) 2002-2003 Intel Corporation.&#10;  Copyright (c) 2000-2003 The Regents of the University  of California.    &#10;  All rights reserved.&#10;&#10; Redistribution and use in source and binary forms, with or without&#10; modification, are permitted provided that the following conditions&#10; are met:&#10;&#10; - Redistributions of source code must retain the above copyright&#10;   notice, this list of conditions and the following disclaimer.&#10; - Redistributions in binary form must reproduce the above copyright&#10;   notice, this list of conditions and the following disclaimer in the&#10;   documentation and/or other materials provided with the&#10;   distribution.&#10; - Neither the name of the copyright holder nor the names of&#10;   its contributors may be used to endorse or promote products derived&#10;   from this software without specific prior written permission.&#10;&#10; THIS SOFTWARE IS PROVIDED BY THE COPYRIGHT HOLDERS AND CONTRIBUTORS&#10; &#34;AS IS&#34; AND ANY EXPRESS OR IMPLIED WARRANTIES, INCLUDING, BUT NOT&#10; LIMITED TO, THE IMPLIED WARRANTIES OF MERCHANTABILITY AND FITNESS&#10; FOR A PARTICULAR PURPOSE ARE DISCLAIMED.  IN NO EVENT SHALL&#10; THE COPYRIGHT HOLDER OR CONTRIBUTORS BE LIABLE FOR ANY DIRECT,&#10; INDIRECT, INCIDENTAL, SPECIAL, EXEMPLARY, OR CONSEQUENTIAL DAMAGES&#10; (INCLUDING, BUT NOT LIMITED TO, PROCUREMENT OF SUBSTITUTE GOODS OR&#10; SERVICES; LOSS OF USE, DATA, OR PROFITS; OR BUSINESS INTERRUPTION)&#10; HOWEVER CAUSED AND ON ANY THEORY OF LIABILITY, WHETHER IN CONTRACT,&#10; STRICT LIABILITY, OR TORT (INCLUDING NEGLIGENCE OR OTHERWISE)&#10; ARISING IN ANY WAY OUT OF THE USE OF THIS SOFTWARE, EVEN IF ADVISED&#10; OF THE POSSIBILITY OF SUCH DAMAGE.&#10;&#10;  @author Jason Hill, Philip Levis, Nelson Lee, David Gay&#10;  @author Alan Broad &#60;abroad@xbow.com>&#10;  @author Matt Miller &#60;mmiller@xbow.com>&#10;  @author Martin Turon &#60;mturon@xbow.com>&#10;&#10;  $Id: platform_hardware.h,v 1.6 2010-06-29 22:07:54 scipio Exp $&#10;</long>
      </documentation>
      <module/>
    </component>
    <component qname="HilTimerMilliC.AlarmToTimerC" loc="46(HilTimerMilliC.AlarmToTimerC):/opt/tinyos-2.1.2/tos/lib/timer/AlarmToTimerC.nc">
      <documentation loc="36:/opt/tinyos-2.1.2/tos/lib/timer/AlarmToTimerC.nc">
        <short>&#10; AlarmToTimerC converts a 32-bit Alarm to a Timer.</short>
        <long>&#10; AlarmToTimerC converts a 32-bit Alarm to a Timer.  &#10;&#10; &#60;p>See TEP102 for more details.&#10; @param precision_tag A type indicating the precision of the Alarm and&#10; Timer being converted.&#10;&#10; @author Cory Sharp &#60;cssharp@eecs.berkeley.edu>&#10;</long>
      </documentation>
      <instance number="0">
        <component-ref qname="AlarmToTimerC"/>
        <arguments>
          <type-tag size="I:4" alignment="I:4"><struct-ref ref="0x4020ca70"/>
            <typename><typedef-ref name="TMilli" ref="0x4020cc38"/></typename>
          </type-tag>
        </arguments>
      </instance>
      <module/>
    </component>
    <component qname="HilTimerMilliC.VirtualizeTimerC" loc="46(HilTimerMilliC.VirtualizeTimerC):/opt/tinyos-2.1.2/tos/lib/timer/VirtualizeTimerC.nc">
      <documentation loc="34:/opt/tinyos-2.1.2/tos/lib/timer/VirtualizeTimerC.nc">
        <short>&#10; VirtualizeTimerC uses a single Timer to create up to 255 virtual timers.</short>
        <long>&#10; VirtualizeTimerC uses a single Timer to create up to 255 virtual timers.&#10;&#10; &#60;p>See TEP102 for more details.&#10;&#10; @param precision_tag A type indicating the precision of the Timer being &#10;   virtualized.&#10; @param max_timers Number of virtual timers to create.&#10;&#10; @author Cory Sharp &#60;cssharp@eecs.berkeley.edu>&#10;</long>
      </documentation>
      <instance number="0">
        <component-ref qname="VirtualizeTimerC"/>
        <arguments>
          <type-tag size="I:4" alignment="I:4"><struct-ref ref="0x4020ca70"/>
            <typename><typedef-ref name="TMilli" ref="0x4020cc38"/></typename>
          </type-tag>
          <value cst="I:1">
            <type-int cname="unsigned int" unsigned="" size="I:4" alignment="I:4"></type-int>
          </value>
        </arguments>
      </instance>
      <module/>
    </component>
    <component qname="HilTimerMilliC.CounterToLocalTimeC" loc="46(HilTimerMilliC.CounterToLocalTimeC):/opt/tinyos-2.1.2/tos/lib/timer/CounterToLocalTimeC.nc">
      <documentation loc="36:/opt/tinyos-2.1.2/tos/lib/timer/CounterToLocalTimeC.nc">
        <short>&#10; CounterToLocalTimeC converts a 32-bit LocalTime to a Counter.</short>
        <long>&#10; CounterToLocalTimeC converts a 32-bit LocalTime to a Counter.  &#10;&#10; &#60;p>See TEP102 for more details.&#10; @param precision_tag A type indicating the precision of the LocalTime and&#10; Counter being converted.&#10;&#10; @author Cory Sharp &#60;cssharp@eecs.berkeley.edu>&#10;</long>
      </documentation>
      <instance number="0">
        <component-ref qname="CounterToLocalTimeC"/>
        <arguments>
          <type-tag size="I:4" alignment="I:4"><struct-ref ref="0x4020ca70"/>
            <typename><typedef-ref name="TMilli" ref="0x4020cc38"/></typename>
          </type-tag>
        </arguments>
      </instance>
      <module/>
    </component>
    <component qname="NetworkAppC.AMSenderC" loc="47(NetworkAppC.AMSenderC):/opt/tinyos-2.1.2/tos/system/AMSenderC.nc">
      <documentation loc="33:/opt/tinyos-2.1.2/tos/system/AMSenderC.nc">
        <short>&#10; The virtualized active message send abstraction.</short>
        <long>&#10; The virtualized active message send abstraction. Each instantiation&#10; of AMSenderC has its own queue of depth one. Therefore, it does not&#10; have to contend with other AMSenderC instantiations for queue space.&#10; The underlying implementation schedules the packets in these queues&#10; using some form of fair-share queueing.&#10;&#10; @author Philip Levis&#10; @date   Jan 16 2006&#10; @see    TEP 116: Packet Protocols&#10;</long>
      </documentation>
      <instance number="0">
        <component-ref qname="AMSenderC"/>
        <arguments>
          <value cst="I:6">
            <type-int cname="int" size="I:4" alignment="I:4"></type-int>
          </value>
        </arguments>
      </instance>
      <configuration/>
    </component>
    <component qname="NetworkAppC.AMSenderC.SenderC" loc="47(NetworkAppC.AMSenderC.SenderC):/opt/tinyos-2.1.2/tos/system/DirectAMSenderC.nc">
      <documentation loc="33:/opt/tinyos-2.1.2/tos/system/DirectAMSenderC.nc">
        <short>&#10; The virtualized active message send abstraction.</short>
        <long>&#10; The virtualized active message send abstraction. Each instantiation&#10; of AMSenderC has its own queue of depth one. Therefore, it does not&#10; have to contend with other AMSenderC instantiations for queue space.&#10; The underlying implementation schedules the packets in these queues&#10; using some form of fair-share queueing.&#10;&#10; @author Philip Levis&#10; @date   Jan 16 2006&#10; @see    TEP 116: Packet Protocols&#10;</long>
      </documentation>
      <instance number="0">
        <component-ref qname="DirectAMSenderC"/>
        <arguments>
          <value cst="U:">
            <type-int cname="unsigned char" unsigned="" size="I:1" alignment="I:1">
              <typename><typedef-ref name="am_id_t" ref="0x406e8168"/></typename>
            </type-int>
          </value>
        </arguments>
      </instance>
      <configuration/>
    </component>
    <component qname="NetworkAppC.AMSenderC.SenderC.AMQueueEntryP" loc="43(NetworkAppC.AMSenderC.SenderC.AMQueueEntryP):/opt/tinyos-2.1.2/tos/system/AMQueueEntryP.nc">
      <documentation loc="33:/opt/tinyos-2.1.2/tos/system/AMQueueEntryP.nc">
        <short>&#10; Internal AM component that fills in needed packet fields for the &#10; AMSend -> Send transformation.</short>
        <long>&#10; Internal AM component that fills in needed packet fields for the &#10; AMSend -> Send transformation.&#10;&#10; @author Philip Levis&#10; @date   Jan 16 2006&#10;</long>
      </documentation>
      <instance number="0">
        <component-ref qname="AMQueueEntryP"/>
        <arguments>
          <value cst="U:">
            <type-int cname="unsigned char" unsigned="" size="I:1" alignment="I:1">
              <typename><typedef-ref name="am_id_t" ref="0x406e8168"/></typename>
            </type-int>
          </value>
        </arguments>
      </instance>
      <module/>
    </component>
    <component qname="AMQueueP" loc="42:/opt/tinyos-2.1.2/tos/system/AMQueueP.nc">
      <documentation loc="33:/opt/tinyos-2.1.2/tos/system/AMQueueP.nc">
        <short>&#10; The fair-share send queue for AM radio communication.</short>
        <long>&#10; The fair-share send queue for AM radio communication.&#10;&#10; @author Philip Levis&#10; @date   Jan 16 2006&#10;</long>
      </documentation>
      <configuration/>
    </component>
    <component qname="AMQueueP.AMQueueImplP" loc="45(AMQueueP.AMQueueImplP):/opt/tinyos-2.1.2/tos/system/AMQueueImplP.nc">
      <documentation loc="33:/opt/tinyos-2.1.2/tos/system/AMQueueImplP.nc">
        <short>&#10; An AM send queue that provides a Service Instance pattern for&#10; formatted packets and calls an underlying AMSend in a round-robin&#10; fashion.</short>
        <long>&#10; An AM send queue that provides a Service Instance pattern for&#10; formatted packets and calls an underlying AMSend in a round-robin&#10; fashion. Used to share L2 bandwidth between different communication&#10; clients.&#10;&#10; @author Philip Levis&#10; @date   Jan 16 2006&#10;</long>
      </documentation>
      <instance number="0">
        <component-ref qname="AMQueueImplP"/>
        <arguments>
          <value cst="I:1">
            <type-int cname="int" size="I:4" alignment="I:4"></type-int>
          </value>
        </arguments>
      </instance>
      <module/>
    </component>
    <component qname="NetworkAppC.AMReceiverC" loc="43(NetworkAppC.AMReceiverC):/opt/tinyos-2.1.2/tos/system/AMReceiverC.nc">
      <documentation loc="33:/opt/tinyos-2.1.2/tos/system/AMReceiverC.nc">
        <short>&#10; The virtualized AM reception abstraction.</short>
        <long>&#10; The virtualized AM reception abstraction.&#10;&#10; @author Philip Levis&#10; @date   Jan 16 2006&#10; @see    TEP 116: Packet Protocols&#10;</long>
      </documentation>
      <instance number="0">
        <component-ref qname="AMReceiverC"/>
        <arguments>
          <value cst="I:6">
            <type-int cname="int" size="I:4" alignment="I:4"></type-int>
          </value>
        </arguments>
      </instance>
      <configuration/>
    </component>
    <component qname="Atm128AlarmAsyncC" loc="23:/opt/tinyos-2.1.2/tos/chips/atm128/timer/Atm128AlarmAsyncC.nc" abstract="">
      <documentation loc="11:/opt/tinyos-2.1.2/tos/chips/atm128/timer/Atm128AlarmAsyncC.nc">
        <short>&#10; Build a 32-bit alarm and counter from the atmega128's 8-bit timer 0&#10; in asynchronous mode.</short>
        <long>&#10; Build a 32-bit alarm and counter from the atmega128's 8-bit timer 0&#10; in asynchronous mode. Attempting to use the generic Atm128AlarmC&#10; component and the generic timer components runs into problems&#10; apparently related to letting timer 0 overflow.&#10; &#10; So, instead, this version (inspired by the 1.x code and a remark from&#10; Martin Turon) directly builds a 32-bit alarm and counter on top of timer 0&#10; and never lets timer 0 overflow.&#10;&#10; @author David Gay&#10;</long>
      </documentation>
      <parameters>
        <typedef name="precision" ref="0x40a2f908" loc="23:/opt/tinyos-2.1.2/tos/chips/atm128/timer/Atm128AlarmAsyncC.nc">
          <component-ref qname="Atm128AlarmAsyncC"/>
          <type-var size="U:" alignment="U:"><typedef-ref name="precision" scoped="" ref="0x40a2f908"/></type-var>
        </typedef>
        <constant name="divider" ref="0x40a2fac8" loc="23:/opt/tinyos-2.1.2/tos/chips/atm128/timer/Atm128AlarmAsyncC.nc">
          <component-ref qname="Atm128AlarmAsyncC"/>
          <type-int cname="int" size="I:4" alignment="I:4"></type-int>
        </constant>
      </parameters>
      <configuration/>
    </component>
    <component qname="HplAtm128GeneralIOPinP" loc="41:/opt/tinyos-2.1.2/tos/chips/atm128/pins/sim/HplAtm128GeneralIOPinP.nc" abstract="">
      <documentation loc="37:/opt/tinyos-2.1.2/tos/chips/atm128/pins/sim/HplAtm128GeneralIOPinP.nc">
        <short>&#10; Generic pin access for pins mapped into I/O space (for which the sbi, cbi&#10; instructions give atomic updates).</short>
        <long>&#10; Generic pin access for pins mapped into I/O space (for which the sbi, cbi&#10; instructions give atomic updates). This can be used for ports A-E.&#10;</long>
      </documentation>
      <parameters>
        <constant name="port_addr" ref="0x407d7c50" loc="41:/opt/tinyos-2.1.2/tos/chips/atm128/pins/sim/HplAtm128GeneralIOPinP.nc">
          <component-ref qname="HplAtm128GeneralIOPinP"/>
          <type-int cname="unsigned char" unsigned="" size="I:1" alignment="I:1">
            <typename><typedef-ref name="uint8_t" ref="0x40218250"/></typename>
          </type-int>
        </constant>
        <constant name="ddr_addr" ref="0x407d7e78" loc="42:/opt/tinyos-2.1.2/tos/chips/atm128/pins/sim/HplAtm128GeneralIOPinP.nc">
          <component-ref qname="HplAtm128GeneralIOPinP"/>
          <type-int cname="unsigned char" unsigned="" size="I:1" alignment="I:1">
            <typename><typedef-ref name="uint8_t" ref="0x40218250"/></typename>
          </type-int>
        </constant>
        <constant name="pin_addr" ref="0x407ec0e0" loc="43:/opt/tinyos-2.1.2/tos/chips/atm128/pins/sim/HplAtm128GeneralIOPinP.nc">
          <component-ref qname="HplAtm128GeneralIOPinP"/>
          <type-int cname="unsigned char" unsigned="" size="I:1" alignment="I:1">
            <typename><typedef-ref name="uint8_t" ref="0x40218250"/></typename>
          </type-int>
        </constant>
        <constant name="bit" ref="0x407ec2d0" loc="44:/opt/tinyos-2.1.2/tos/chips/atm128/pins/sim/HplAtm128GeneralIOPinP.nc">
          <component-ref qname="HplAtm128GeneralIOPinP"/>
          <type-int cname="unsigned char" unsigned="" size="I:1" alignment="I:1">
            <typename><typedef-ref name="uint8_t" ref="0x40218250"/></typename>
          </type-int>
        </constant>
      </parameters>
      <module/>
    </component>
    <component qname="HplAtm128GeneralIOSlowPinP" loc="42:/opt/tinyos-2.1.2/tos/chips/atm128/pins/HplAtm128GeneralIOSlowPinP.nc" abstract="" safe="">
      <documentation loc="34:/opt/tinyos-2.1.2/tos/chips/atm128/pins/HplAtm128GeneralIOSlowPinP.nc">
        <short>&#10; Generic pin access for pins not mapped into I/O space (for which the&#10; sbi, cbi instructions cannot be used).</short>
        <long>&#10; Generic pin access for pins not mapped into I/O space (for which the&#10; sbi, cbi instructions cannot be used). This can be used for ports F-G.&#10;&#10; @author Martin Turon &#60;mturon@xbow.com>&#10; @author David Gay &#60;dgay@intel-research.net>&#10;</long>
      </documentation>
      <parameters>
        <constant name="port_addr" ref="0x408207f8" loc="42:/opt/tinyos-2.1.2/tos/chips/atm128/pins/HplAtm128GeneralIOSlowPinP.nc">
          <component-ref qname="HplAtm128GeneralIOSlowPinP"/>
          <type-int cname="unsigned char" unsigned="" size="I:1" alignment="I:1">
            <typename><typedef-ref name="uint8_t" ref="0x40218250"/></typename>
          </type-int>
        </constant>
        <constant name="ddr_addr" ref="0x40820a20" loc="43:/opt/tinyos-2.1.2/tos/chips/atm128/pins/HplAtm128GeneralIOSlowPinP.nc">
          <component-ref qname="HplAtm128GeneralIOSlowPinP"/>
          <type-int cname="unsigned char" unsigned="" size="I:1" alignment="I:1">
            <typename><typedef-ref name="uint8_t" ref="0x40218250"/></typename>
          </type-int>
        </constant>
        <constant name="pin_addr" ref="0x40820c48" loc="44:/opt/tinyos-2.1.2/tos/chips/atm128/pins/HplAtm128GeneralIOSlowPinP.nc">
          <component-ref qname="HplAtm128GeneralIOSlowPinP"/>
          <type-int cname="unsigned char" unsigned="" size="I:1" alignment="I:1">
            <typename><typedef-ref name="uint8_t" ref="0x40218250"/></typename>
          </type-int>
        </constant>
        <constant name="bit" ref="0x40820e38" loc="45:/opt/tinyos-2.1.2/tos/chips/atm128/pins/HplAtm128GeneralIOSlowPinP.nc">
          <component-ref qname="HplAtm128GeneralIOSlowPinP"/>
          <type-int cname="unsigned char" unsigned="" size="I:1" alignment="I:1">
            <typename><typedef-ref name="uint8_t" ref="0x40218250"/></typename>
          </type-int>
        </constant>
      </parameters>
      <module/>
    </component>
    <component qname="VirtualizeTimerC" loc="46:/opt/tinyos-2.1.2/tos/lib/timer/VirtualizeTimerC.nc" abstract="" safe="">
      <documentation loc="34:/opt/tinyos-2.1.2/tos/lib/timer/VirtualizeTimerC.nc">
        <short>&#10; VirtualizeTimerC uses a single Timer to create up to 255 virtual timers.</short>
        <long>&#10; VirtualizeTimerC uses a single Timer to create up to 255 virtual timers.&#10;&#10; &#60;p>See TEP102 for more details.&#10;&#10; @param precision_tag A type indicating the precision of the Timer being &#10;   virtualized.&#10; @param max_timers Number of virtual timers to create.&#10;&#10; @author Cory Sharp &#60;cssharp@eecs.berkeley.edu>&#10;</long>
      </documentation>
      <parameters>
        <typedef name="precision_tag" ref="0x418ba290" loc="46:/opt/tinyos-2.1.2/tos/lib/timer/VirtualizeTimerC.nc">
          <component-ref qname="VirtualizeTimerC"/>
          <type-var size="U:" alignment="U:"><typedef-ref name="precision_tag" scoped="" ref="0x418ba290"/></type-var>
        </typedef>
        <constant name="max_timers" ref="0x418ba470" loc="46:/opt/tinyos-2.1.2/tos/lib/timer/VirtualizeTimerC.nc">
          <component-ref qname="VirtualizeTimerC"/>
          <type-int cname="int" size="I:4" alignment="I:4"></type-int>
        </constant>
      </parameters>
      <module/>
    </component>
    <component qname="AMQueueImplP" loc="45:/opt/tinyos-2.1.2/tos/system/AMQueueImplP.nc" abstract="" safe="">
      <documentation loc="33:/opt/tinyos-2.1.2/tos/system/AMQueueImplP.nc">
        <short>&#10; An AM send queue that provides a Service Instance pattern for&#10; formatted packets and calls an underlying AMSend in a round-robin&#10; fashion.</short>
        <long>&#10; An AM send queue that provides a Service Instance pattern for&#10; formatted packets and calls an underlying AMSend in a round-robin&#10; fashion. Used to share L2 bandwidth between different communication&#10; clients.&#10;&#10; @author Philip Levis&#10; @date   Jan 16 2006&#10;</long>
      </documentation>
      <parameters>
        <constant name="numClients" ref="0x4191e8f8" loc="45:/opt/tinyos-2.1.2/tos/system/AMQueueImplP.nc">
          <component-ref qname="AMQueueImplP"/>
          <type-int cname="int" size="I:4" alignment="I:4"></type-int>
        </constant>
      </parameters>
      <module/>
    </component>
    <component qname="HplAtm128GeneralIOPortP" loc="40:/opt/tinyos-2.1.2/tos/chips/atm128/pins/HplAtm128GeneralIOPortP.nc" abstract="">
      <documentation loc="34:/opt/tinyos-2.1.2/tos/chips/atm128/pins/HplAtm128GeneralIOPortP.nc">
        <short>&#10; Generic component to expose a full 8-bit port of GPIO pins.</short>
        <long>&#10; Generic component to expose a full 8-bit port of GPIO pins.&#10;&#10; @author Martin Turon &#60;mturon@xbow.com>&#10;</long>
      </documentation>
      <parameters>
        <constant name="port_addr" ref="0x407df868" loc="40:/opt/tinyos-2.1.2/tos/chips/atm128/pins/HplAtm128GeneralIOPortP.nc">
          <component-ref qname="HplAtm128GeneralIOPortP"/>
          <type-int cname="unsigned char" unsigned="" size="I:1" alignment="I:1">
            <typename><typedef-ref name="uint8_t" ref="0x40218250"/></typename>
          </type-int>
        </constant>
        <constant name="ddr_addr" ref="0x407dfa80" loc="40:/opt/tinyos-2.1.2/tos/chips/atm128/pins/HplAtm128GeneralIOPortP.nc">
          <component-ref qname="HplAtm128GeneralIOPortP"/>
          <type-int cname="unsigned char" unsigned="" size="I:1" alignment="I:1">
            <typename><typedef-ref name="uint8_t" ref="0x40218250"/></typename>
          </type-int>
        </constant>
        <constant name="pin_addr" ref="0x407dfc98" loc="40:/opt/tinyos-2.1.2/tos/chips/atm128/pins/HplAtm128GeneralIOPortP.nc">
          <component-ref qname="HplAtm128GeneralIOPortP"/>
          <type-int cname="unsigned char" unsigned="" size="I:1" alignment="I:1">
            <typename><typedef-ref name="uint8_t" ref="0x40218250"/></typename>
          </type-int>
        </constant>
      </parameters>
      <configuration/>
    </component>
    <component qname="AMReceiverC" loc="43:/opt/tinyos-2.1.2/tos/system/AMReceiverC.nc" abstract="">
      <documentation loc="33:/opt/tinyos-2.1.2/tos/system/AMReceiverC.nc">
        <short>&#10; The virtualized AM reception abstraction.</short>
        <long>&#10; The virtualized AM reception abstraction.&#10;&#10; @author Philip Levis&#10; @date   Jan 16 2006&#10; @see    TEP 116: Packet Protocols&#10;</long>
      </documentation>
      <parameters>
        <constant name="amId" ref="0x419438b8" loc="43:/opt/tinyos-2.1.2/tos/system/AMReceiverC.nc">
          <component-ref qname="AMReceiverC"/>
          <type-int cname="unsigned char" unsigned="" size="I:1" alignment="I:1">
            <typename><typedef-ref name="am_id_t" ref="0x406e8168"/></typename>
          </type-int>
        </constant>
      </parameters>
      <configuration/>
    </component>
    <component qname="AlarmToTimerC" loc="46:/opt/tinyos-2.1.2/tos/lib/timer/AlarmToTimerC.nc" abstract="" safe="">
      <documentation loc="36:/opt/tinyos-2.1.2/tos/lib/timer/AlarmToTimerC.nc">
        <short>&#10; AlarmToTimerC converts a 32-bit Alarm to a Timer.</short>
        <long>&#10; AlarmToTimerC converts a 32-bit Alarm to a Timer.  &#10;&#10; &#60;p>See TEP102 for more details.&#10; @param precision_tag A type indicating the precision of the Alarm and&#10; Timer being converted.&#10;&#10; @author Cory Sharp &#60;cssharp@eecs.berkeley.edu>&#10;</long>
      </documentation>
      <parameters>
        <typedef name="precision_tag" ref="0x417a7ae8" loc="46:/opt/tinyos-2.1.2/tos/lib/timer/AlarmToTimerC.nc">
          <component-ref qname="AlarmToTimerC"/>
          <type-var size="U:" alignment="U:"><typedef-ref name="precision_tag" scoped="" ref="0x417a7ae8"/></type-var>
        </typedef>
      </parameters>
      <module/>
    </component>
    <component qname="Atm128AlarmAsyncP" loc="23:/opt/tinyos-2.1.2/tos/chips/atm128/timer/Atm128AlarmAsyncP.nc" abstract="" safe="">
      <documentation loc="11:/opt/tinyos-2.1.2/tos/chips/atm128/timer/Atm128AlarmAsyncP.nc">
        <short>&#10; Build a 32-bit alarm and counter from the atmega128's 8-bit timer 0&#10; in asynchronous mode.</short>
        <long>&#10; Build a 32-bit alarm and counter from the atmega128's 8-bit timer 0&#10; in asynchronous mode. Attempting to use the generic Atm128AlarmC&#10; component and the generic timer components runs into problems&#10; apparently related to letting timer 0 overflow.&#10; &#10; So, instead, this version (inspired by the 1.x code and a remark from&#10; Martin Turon) directly builds a 32-bit alarm and counter on top of timer 0&#10; and never lets timer 0 overflow.&#10;&#10; @author David Gay&#10;</long>
      </documentation>
      <parameters>
        <typedef name="precision" ref="0x40a25c08" loc="23:/opt/tinyos-2.1.2/tos/chips/atm128/timer/Atm128AlarmAsyncP.nc">
          <component-ref qname="Atm128AlarmAsyncP"/>
          <type-var size="U:" alignment="U:"><typedef-ref name="precision" scoped="" ref="0x40a25c08"/></type-var>
        </typedef>
        <constant name="divider" ref="0x40a25dc8" loc="23:/opt/tinyos-2.1.2/tos/chips/atm128/timer/Atm128AlarmAsyncP.nc">
          <component-ref qname="Atm128AlarmAsyncP"/>
          <type-int cname="int" size="I:4" alignment="I:4"></type-int>
        </constant>
      </parameters>
      <module/>
    </component>
    <component qname="AMSenderC" loc="47:/opt/tinyos-2.1.2/tos/system/AMSenderC.nc" abstract="">
      <documentation loc="33:/opt/tinyos-2.1.2/tos/system/AMSenderC.nc">
        <short>&#10; The virtualized active message send abstraction.</short>
        <long>&#10; The virtualized active message send abstraction. Each instantiation&#10; of AMSenderC has its own queue of depth one. Therefore, it does not&#10; have to contend with other AMSenderC instantiations for queue space.&#10; The underlying implementation schedules the packets in these queues&#10; using some form of fair-share queueing.&#10;&#10; @author Philip Levis&#10; @date   Jan 16 2006&#10; @see    TEP 116: Packet Protocols&#10;</long>
      </documentation>
      <parameters>
        <constant name="AMId" ref="0x418e1d80" loc="47:/opt/tinyos-2.1.2/tos/system/AMSenderC.nc">
          <component-ref qname="AMSenderC"/>
          <type-int cname="unsigned char" unsigned="" size="I:1" alignment="I:1">
            <typename><typedef-ref name="am_id_t" ref="0x406e8168"/></typename>
          </type-int>
        </constant>
      </parameters>
      <configuration/>
    </component>
    <component qname="AMQueueEntryP" loc="43:/opt/tinyos-2.1.2/tos/system/AMQueueEntryP.nc" abstract="" safe="">
      <documentation loc="33:/opt/tinyos-2.1.2/tos/system/AMQueueEntryP.nc">
        <short>&#10; Internal AM component that fills in needed packet fields for the &#10; AMSend -> Send transformation.</short>
        <long>&#10; Internal AM component that fills in needed packet fields for the &#10; AMSend -> Send transformation.&#10;&#10; @author Philip Levis&#10; @date   Jan 16 2006&#10;</long>
      </documentation>
      <parameters>
        <constant name="amId" ref="0x418d73b0" loc="43:/opt/tinyos-2.1.2/tos/system/AMQueueEntryP.nc">
          <component-ref qname="AMQueueEntryP"/>
          <type-int cname="unsigned char" unsigned="" size="I:1" alignment="I:1">
            <typename><typedef-ref name="am_id_t" ref="0x406e8168"/></typename>
          </type-int>
        </constant>
      </parameters>
      <module/>
    </component>
    <component qname="DirectAMSenderC" loc="47:/opt/tinyos-2.1.2/tos/system/DirectAMSenderC.nc" abstract="">
      <documentation loc="33:/opt/tinyos-2.1.2/tos/system/DirectAMSenderC.nc">
        <short>&#10; The virtualized active message send abstraction.</short>
        <long>&#10; The virtualized active message send abstraction. Each instantiation&#10; of AMSenderC has its own queue of depth one. Therefore, it does not&#10; have to contend with other AMSenderC instantiations for queue space.&#10; The underlying implementation schedules the packets in these queues&#10; using some form of fair-share queueing.&#10;&#10; @author Philip Levis&#10; @date   Jan 16 2006&#10; @see    TEP 116: Packet Protocols&#10;</long>
      </documentation>
      <parameters>
        <constant name="AMId" ref="0x418dc8b8" loc="47:/opt/tinyos-2.1.2/tos/system/DirectAMSenderC.nc">
          <component-ref qname="DirectAMSenderC"/>
          <type-int cname="unsigned char" unsigned="" size="I:1" alignment="I:1">
            <typename><typedef-ref name="am_id_t" ref="0x406e8168"/></typename>
          </type-int>
        </constant>
      </parameters>
      <configuration/>
    </component>
    <component qname="CounterToLocalTimeC" loc="46:/opt/tinyos-2.1.2/tos/lib/timer/CounterToLocalTimeC.nc" abstract="" safe="">
      <documentation loc="36:/opt/tinyos-2.1.2/tos/lib/timer/CounterToLocalTimeC.nc">
        <short>&#10; CounterToLocalTimeC converts a 32-bit LocalTime to a Counter.</short>
        <long>&#10; CounterToLocalTimeC converts a 32-bit LocalTime to a Counter.  &#10;&#10; &#60;p>See TEP102 for more details.&#10; @param precision_tag A type indicating the precision of the LocalTime and&#10; Counter being converted.&#10;&#10; @author Cory Sharp &#60;cssharp@eecs.berkeley.edu>&#10;</long>
      </documentation>
      <parameters>
        <typedef name="precision_tag" ref="0x418ecb40" loc="46:/opt/tinyos-2.1.2/tos/lib/timer/CounterToLocalTimeC.nc">
          <component-ref qname="CounterToLocalTimeC"/>
          <type-var size="U:" alignment="U:"><typedef-ref name="precision_tag" scoped="" ref="0x418ecb40"/></type-var>
        </typedef>
      </parameters>
      <module/>
    </component>
    <component qname="TimerMilliC" loc="44:/opt/tinyos-2.1.2/tos/system/TimerMilliC.nc" abstract="">
      <documentation loc="33:/opt/tinyos-2.1.2/tos/system/TimerMilliC.nc">
        <short>&#10; The virtualized millisecond timer abstraction.</short>
        <long>&#10; The virtualized millisecond timer abstraction. Instantiating this &#10; component gives an independent millisecond granularity timer.&#10;&#10; @author Philip Levis&#10; @date   January 16 2006&#10; @see    TEP 102: Timers&#10;</long>
      </documentation>
      <parameters>
      </parameters>
      <configuration/>
    </component>
  </components>
  <interfaces>
  </interfaces>
  <interfacedefs>
    <interfacedef qname="SplitControl" loc="87:/opt/tinyos-2.1.2/tos/interfaces/SplitControl.nc">
      <documentation loc="72:/opt/tinyos-2.1.2/tos/interfaces/SplitControl.nc">
        <short>&#10; Please refer to TEP 115 for more information about this interface and its&#10; intended use.&#60;br>&#60;br>&#10;&#10; This is the split-phase counterpart to the StdContol interface.</short>
        <long>&#10; Please refer to TEP 115 for more information about this interface and its&#10; intended use.&#60;br>&#60;br>&#10;&#10; This is the split-phase counterpart to the StdContol interface.  It&#10; should be used for switching between the on and off power states of&#10; the component providing it.  For each &#60;code>start()&#60;/code> or&#10; &#60;code>stop()&#60;/code> command, if the command returns SUCCESS, then a&#10; corresponding  &#60;code>startDone()&#60;/code> or &#60;code>stopDone()&#60;/code> event&#10; must be signalled.&#10;&#10; @author Joe Polastre&#10; @author Kevin Klues (klueska@cs.wustl.edu)&#10;</long>
      </documentation>
      <function event="" provided="0" name="startDone" ref="0x408b1d58" loc="113:/opt/tinyos-2.1.2/tos/interfaces/SplitControl.nc">
        <documentation loc="106:/opt/tinyos-2.1.2/tos/interfaces/SplitControl.nc">
          <short> &#10; Notify caller that the component has been started and is ready to&#10; receive other commands.</short>
          <long> &#10; Notify caller that the component has been started and is ready to&#10; receive other commands.&#10;&#10; @param &#60;b>error&#60;/b> -- SUCCESS if the component was successfully&#10;                        turned on, FAIL otherwise&#10;</long>
        </documentation>
        <interfacedef-ref qname="SplitControl"/>
        <type-function size="I:1" alignment="I:1">
          <type-void size="I:1" alignment="I:1"></type-void>
          <function-parameters>
            <type-int cname="unsigned char" unsigned="" size="I:1" alignment="I:1">
              <typename><typedef-ref name="error_t" ref="0x405c8e98"/></typename>
            </type-int>
          </function-parameters>
        </type-function>
        <parameters>
          <variable name="error" ref="0x408b1c00" loc="113:/opt/tinyos-2.1.2/tos/interfaces/SplitControl.nc">
            <type-int cname="unsigned char" unsigned="" size="I:1" alignment="I:1">
              <typename><typedef-ref name="error_t" ref="0x405c8e98"/></typename>
            </type-int>
          </variable>
        </parameters>
      </function>
      <function event="" provided="0" name="stopDone" ref="0x408afae0" loc="138:/opt/tinyos-2.1.2/tos/interfaces/SplitControl.nc">
        <documentation loc="132:/opt/tinyos-2.1.2/tos/interfaces/SplitControl.nc">
          <short>&#10; Notify caller that the component has been stopped.</short>
          <long>&#10; Notify caller that the component has been stopped.&#10;&#10; @param &#60;b>error&#60;/b> -- SUCCESS if the component was successfully&#10;                        turned off, FAIL otherwise&#10;</long>
        </documentation>
        <interfacedef-ref qname="SplitControl"/>
        <type-function size="I:1" alignment="I:1">
          <type-void size="I:1" alignment="I:1"></type-void>
          <function-parameters>
            <type-int cname="unsigned char" unsigned="" size="I:1" alignment="I:1">
              <typename><typedef-ref name="error_t" ref="0x405c8e98"/></typename>
            </type-int>
          </function-parameters>
        </type-function>
        <parameters>
          <variable name="error" ref="0x408af988" loc="138:/opt/tinyos-2.1.2/tos/interfaces/SplitControl.nc">
            <type-int cname="unsigned char" unsigned="" size="I:1" alignment="I:1">
              <typename><typedef-ref name="error_t" ref="0x405c8e98"/></typename>
            </type-int>
          </variable>
        </parameters>
      </function>
      <function command="" provided="0" name="start" ref="0x408b1518" loc="104:/opt/tinyos-2.1.2/tos/interfaces/SplitControl.nc">
        <documentation loc="89:/opt/tinyos-2.1.2/tos/interfaces/SplitControl.nc">
          <short>&#10; Start this component and all of its subcomponents.</short>
          <long>&#10; Start this component and all of its subcomponents.  Return&#10; values of SUCCESS will always result in a &#60;code>startDone()&#60;/code>&#10; event being signalled.&#10;&#10; @return SUCCESS if the device is already in the process of &#10;         starting or the device was off and the device is now ready to turn &#10;         on.  After receiving this return value, you should expect a &#10;         &#60;code>startDone&#60;/code> event in the near future.&#60;br>&#10;         EBUSY if the component is in the middle of powering down&#10;               i.e. a &#60;code>stop()&#60;/code> command has been called,&#10;               and a &#60;code>stopDone()&#60;/code> event is pending&#60;br>&#10;         EALREADY if the device is already on &#60;br>&#10;         FAIL Otherwise&#10;</long>
        </documentation>
        <interfacedef-ref qname="SplitControl"/>
        <type-function size="I:1" alignment="I:1">
          <type-int cname="unsigned char" unsigned="" size="I:1" alignment="I:1">
            <typename><typedef-ref name="error_t" ref="0x405c8e98"/></typename>
          </type-int>
          <function-parameters>
          </function-parameters>
        </type-function>
        <parameters>
        </parameters>
      </function>
      <function command="" provided="0" name="stop" ref="0x408af2a8" loc="130:/opt/tinyos-2.1.2/tos/interfaces/SplitControl.nc">
        <documentation loc="115:/opt/tinyos-2.1.2/tos/interfaces/SplitControl.nc">
          <short>&#10; Start this component and all of its subcomponents.</short>
          <long>&#10; Start this component and all of its subcomponents.  Return&#10; values of SUCCESS will always result in a &#60;code>startDone()&#60;/code>&#10; event being signalled.&#10;&#10; @return SUCCESS if the device is already in the process of &#10;         stopping or the device was on and the device is now ready to turn &#10;         off.  After receiving this return value, you should expect a &#10;         &#60;code>stopDone&#60;/code> event in the near future.&#60;br>&#10;         EBUSY if the component is in the middle of powering up&#10;               i.e. a &#60;code>start()&#60;/code> command has been called,&#10;               and a &#60;code>startDone()&#60;/code> event is pending&#60;br>&#10;         EALREADY if the device is already off &#60;br>&#10;         FAIL Otherwise&#10;</long>
        </documentation>
        <interfacedef-ref qname="SplitControl"/>
        <type-function size="I:1" alignment="I:1">
          <type-int cname="unsigned char" unsigned="" size="I:1" alignment="I:1">
            <typename><typedef-ref name="error_t" ref="0x405c8e98"/></typename>
          </type-int>
          <function-parameters>
          </function-parameters>
        </type-function>
        <parameters>
        </parameters>
      </function>
    </interfacedef>
    <interfacedef qname="Boot" loc="50:/opt/tinyos-2.1.2/tos/interfaces/Boot.nc">
      <documentation loc="42:/opt/tinyos-2.1.2/tos/interfaces/Boot.nc">
        <short>&#10; Interface that notifies components when TinyOS has booted&#10; (initialized all of its components), as discussed in TEP 107.</short>
        <long>&#10; Interface that notifies components when TinyOS has booted&#10; (initialized all of its components), as discussed in TEP 107.&#10;&#10; @author Philip Levis&#10; @date   January 5 2005&#10;</long>
      </documentation>
      <function event="" provided="0" name="booted" ref="0x407a16e0" loc="60:/opt/tinyos-2.1.2/tos/interfaces/Boot.nc">
        <documentation loc="51:/opt/tinyos-2.1.2/tos/interfaces/Boot.nc">
          <short>&#10; Signaled when the system has booted successfully.</short>
          <long>&#10; Signaled when the system has booted successfully. Components can&#10; assume the system has been initialized properly. Services may&#10; need to be started to work, however.&#10;&#10; @see StdControl&#10; @see SplitConrol&#10; @see TEP 107: Boot Sequence&#10;</long>
        </documentation>
        <interfacedef-ref qname="Boot"/>
        <type-function size="I:1" alignment="I:1">
          <type-void size="I:1" alignment="I:1"></type-void>
          <function-parameters>
          </function-parameters>
        </type-function>
        <parameters>
        </parameters>
      </function>
    </interfacedef>
    <interfacedef qname="TaskBasic" loc="55:/opt/tinyos-2.1.2/tos/interfaces/TaskBasic.nc">
      <function command="" provided="0" name="postTask" ref="0x407133c0" loc="67:/opt/tinyos-2.1.2/tos/interfaces/TaskBasic.nc">
        <documentation loc="57:/opt/tinyos-2.1.2/tos/interfaces/TaskBasic.nc">
          <short>&#10; Post this task to the TinyOS scheduler.</short>
          <long>&#10; Post this task to the TinyOS scheduler. At some later time,&#10; depending on the scheduling policy, the scheduler will signal the&#10; &#60;tt>run()&#60;/tt> event. &#10;&#10; @return SUCCESS if task was successfuly&#10; posted; the semantics of a non-SUCCESS return value depend on the&#10; implementation of this interface (the class of task).&#10;</long>
        </documentation>
        <interfacedef-ref qname="TaskBasic"/>
        <type-function size="I:1" alignment="I:1">
          <type-int cname="unsigned char" unsigned="" size="I:1" alignment="I:1">
            <typename><typedef-ref name="error_t" ref="0x405c8e98"/></typename>
          </type-int>
          <function-parameters>
          </function-parameters>
        </type-function>
        <parameters>
        </parameters>
      </function>
      <function event="" provided="0" name="runTask" ref="0x407138d8" loc="75:/opt/tinyos-2.1.2/tos/interfaces/TaskBasic.nc">
        <documentation loc="69:/opt/tinyos-2.1.2/tos/interfaces/TaskBasic.nc">
          <short>&#10; Event from the scheduler to run this task.</short>
          <long>&#10; Event from the scheduler to run this task. Following the TinyOS&#10; concurrency model, the codes invoked from &#60;tt>run()&#60;/tt> signals&#10; execute atomically with respect to one another, but can be&#10; preempted by async commands/events.&#10;</long>
        </documentation>
        <interfacedef-ref qname="TaskBasic"/>
        <type-function size="I:1" alignment="I:1">
          <type-void size="I:1" alignment="I:1"></type-void>
          <function-parameters>
          </function-parameters>
        </type-function>
        <parameters>
        </parameters>
      </function>
    </interfacedef>
    <interfacedef qname="HplAtm128TimerAsync" loc="15:/opt/tinyos-2.1.2/tos/chips/atm128/timer/HplAtm128TimerAsync.nc">
      <documentation loc="11:/opt/tinyos-2.1.2/tos/chips/atm128/timer/HplAtm128TimerAsync.nc">
        <short>&#10;&#10; </short>
        <long>&#10;&#10; @author David Gay&#10;</long>
      </documentation>
      <function command="" provided="0" name="controlBusy" ref="0x417dcce8" loc="38:/opt/tinyos-2.1.2/tos/chips/atm128/timer/HplAtm128TimerAsync.nc">
        <documentation loc="34:/opt/tinyos-2.1.2/tos/chips/atm128/timer/HplAtm128TimerAsync.nc">
          <short>&#10; Check if control register TCCR0 is busy (should not be updated if true)&#10; </short>
          <long>&#10; Check if control register TCCR0 is busy (should not be updated if true)&#10; @return TRUE if TCCR0 is busy, FALSE otherwise (can be updated)&#10;</long>
        </documentation>
        <interfacedef-ref qname="HplAtm128TimerAsync"/>
        <type-function size="I:1" alignment="I:1">
          <type-int cname="int" size="I:4" alignment="I:4"></type-int>
          <function-parameters>
          </function-parameters>
        </type-function>
        <parameters>
        </parameters>
      </function>
      <function command="" provided="0" name="compareBusy" ref="0x417db1c8" loc="44:/opt/tinyos-2.1.2/tos/chips/atm128/timer/HplAtm128TimerAsync.nc">
        <documentation loc="40:/opt/tinyos-2.1.2/tos/chips/atm128/timer/HplAtm128TimerAsync.nc">
          <short>&#10; Check if compare register OCR0 is busy (should not be updated if true)&#10; </short>
          <long>&#10; Check if compare register OCR0 is busy (should not be updated if true)&#10; @return TRUE if OCR0 is busy, FALSE otherwise (can be updated)&#10;</long>
        </documentation>
        <interfacedef-ref qname="HplAtm128TimerAsync"/>
        <type-function size="I:1" alignment="I:1">
          <type-int cname="int" size="I:4" alignment="I:4"></type-int>
          <function-parameters>
          </function-parameters>
        </type-function>
        <parameters>
        </parameters>
      </function>
      <function command="" provided="0" name="setTimer0Asynchronous" ref="0x417dc8d0" loc="32:/opt/tinyos-2.1.2/tos/chips/atm128/timer/HplAtm128TimerAsync.nc">
        <documentation loc="29:/opt/tinyos-2.1.2/tos/chips/atm128/timer/HplAtm128TimerAsync.nc">
          <short>&#10; Turn on timer 0 asynchronous mode&#10;</short>
        </documentation>
        <interfacedef-ref qname="HplAtm128TimerAsync"/>
        <type-function size="I:1" alignment="I:1">
          <type-void size="I:1" alignment="I:1"></type-void>
          <function-parameters>
          </function-parameters>
        </type-function>
        <parameters>
        </parameters>
      </function>
      <function command="" provided="0" name="countBusy" ref="0x417db688" loc="50:/opt/tinyos-2.1.2/tos/chips/atm128/timer/HplAtm128TimerAsync.nc">
        <documentation loc="46:/opt/tinyos-2.1.2/tos/chips/atm128/timer/HplAtm128TimerAsync.nc">
          <short>&#10; Check if current timer value (TCNT0) is busy (should not be updated if true)&#10; </short>
          <long>&#10; Check if current timer value (TCNT0) is busy (should not be updated if true)&#10; @return TRUE if TCNT0 is busy, FALSE otherwise (can be updated)&#10;</long>
        </documentation>
        <interfacedef-ref qname="HplAtm128TimerAsync"/>
        <type-function size="I:1" alignment="I:1">
          <type-int cname="int" size="I:4" alignment="I:4"></type-int>
          <function-parameters>
          </function-parameters>
        </type-function>
        <parameters>
        </parameters>
      </function>
      <function command="" provided="0" name="getAssr" ref="0x417dfdd0" loc="21:/opt/tinyos-2.1.2/tos/chips/atm128/timer/HplAtm128TimerAsync.nc">
        <documentation loc="17:/opt/tinyos-2.1.2/tos/chips/atm128/timer/HplAtm128TimerAsync.nc">
          <short>&#10; Read timer0 asynchronous status register (ASSR)&#10; </short>
          <long>&#10; Read timer0 asynchronous status register (ASSR)&#10; @return Current value of ASSR&#10;</long>
        </documentation>
        <interfacedef-ref qname="HplAtm128TimerAsync"/>
        <type-function size="I:1" alignment="I:1">
          <type-tag size="I:1" alignment="I:1"><union-ref ref="0x4179c9c0"/>
            <typename><typedef-ref name="Atm128Assr_t" ref="0x4179cbe8"/></typename>
          </type-tag>
          <function-parameters>
          </function-parameters>
        </type-function>
        <parameters>
        </parameters>
      </function>
      <function command="" provided="0" name="setAssr" ref="0x417dc3f0" loc="27:/opt/tinyos-2.1.2/tos/chips/atm128/timer/HplAtm128TimerAsync.nc">
        <documentation loc="23:/opt/tinyos-2.1.2/tos/chips/atm128/timer/HplAtm128TimerAsync.nc">
          <short>&#10; Set timer0 asynchronous status register (ASSR)&#10; </short>
          <long>&#10; Set timer0 asynchronous status register (ASSR)&#10; @param x New value for ASSR&#10;</long>
        </documentation>
        <interfacedef-ref qname="HplAtm128TimerAsync"/>
        <type-function size="I:1" alignment="I:1">
          <type-void size="I:1" alignment="I:1"></type-void>
          <function-parameters>
            <type-tag size="I:1" alignment="I:1"><union-ref ref="0x4179c9c0"/>
              <typename><typedef-ref name="Atm128Assr_t" ref="0x4179cbe8"/></typename>
            </type-tag>
          </function-parameters>
        </type-function>
        <parameters>
          <variable name="x" ref="0x417dc298" loc="27:/opt/tinyos-2.1.2/tos/chips/atm128/timer/HplAtm128TimerAsync.nc">
            <type-tag size="I:1" alignment="I:1"><union-ref ref="0x4179c9c0"/>
              <typename><typedef-ref name="Atm128Assr_t" ref="0x4179cbe8"/></typename>
            </type-tag>
          </variable>
        </parameters>
      </function>
    </interfacedef>
    <interfacedef qname="TossimPacket" loc="44:/opt/tinyos-2.1.2/tos/lib/tossim/TossimPacket.nc">
      <documentation loc="34:/opt/tinyos-2.1.2/tos/types/TinyError.h">
        <short>&#10; </short>
        <long>&#10; @author Phil Levis&#10; @author David Gay&#10; Revision:  $Revision: 1.12 $&#10;&#10; Defines global error codes for error_t in TinyOS.&#10;</long>
      </documentation>
      <function command="" provided="0" name="strength" ref="0x408de168" loc="45:/opt/tinyos-2.1.2/tos/lib/tossim/TossimPacket.nc">
        <interfacedef-ref qname="TossimPacket"/>
        <type-function size="I:1" alignment="I:1">
          <type-int cname="signed char" size="I:1" alignment="I:1">
            <typename><typedef-ref name="int8_t" ref="0x40213918"/></typename>
          </type-int>
          <function-parameters>
            <type-pointer size="I:4" alignment="I:4">
              <type-tag size="I:41" alignment="I:1"><nx_struct-ref name="message_t" ref="0x406f2838"/>
                <typename><typedef-ref name="message_t" ref="0x406f1600"/></typename>
              </type-tag>
            </type-pointer>
          </function-parameters>
        </type-function>
        <parameters>
          <variable name="msg" ref="0x408de010" loc="45:/opt/tinyos-2.1.2/tos/lib/tossim/TossimPacket.nc">
            <type-pointer size="I:4" alignment="I:4">
              <type-tag size="I:41" alignment="I:1"><nx_struct-ref name="message_t" ref="0x406f2838"/>
                <typename><typedef-ref name="message_t" ref="0x406f1600"/></typename>
              </type-tag>
            </type-pointer>
          </variable>
        </parameters>
      </function>
    </interfacedef>
    <interfacedef qname="Packet" loc="55:/opt/tinyos-2.1.2/tos/interfaces/Packet.nc">
      <documentation loc="42:/opt/tinyos-2.1.2/tos/interfaces/Packet.nc">
        <short> &#10; The basic message data type accessors.</short>
        <long> &#10; The basic message data type accessors. Protocols may use&#10; additional packet interfaces for their protocol specific&#10; data/metadata.&#10;&#10; @author Philip Levis&#10; @date   January 5 2005&#10; @see    TEP 116: Packet Protocols&#10;</long>
      </documentation>
      <function command="" provided="0" name="clear" ref="0x408b2cd8" loc="65:/opt/tinyos-2.1.2/tos/interfaces/Packet.nc">
        <documentation loc="58:/opt/tinyos-2.1.2/tos/interfaces/Packet.nc">
          <short>&#10; Clear out this packet.</short>
          <long>&#10; Clear out this packet.  Note that this is a deep operation and&#10; total operation: calling clear() on any layer will completely&#10; clear the packet for reuse.&#10; @param  'message_t* ONE msg'    the packet to clear&#10;</long>
        </documentation>
        <interfacedef-ref qname="Packet"/>
        <type-function size="I:1" alignment="I:1">
          <type-void size="I:1" alignment="I:1"></type-void>
          <function-parameters>
            <type-pointer size="I:4" alignment="I:4">
              <type-tag size="I:41" alignment="I:1"><nx_struct-ref name="message_t" ref="0x406f2838"/>
                <typename><typedef-ref name="message_t" ref="0x406f1600"/></typename>
              </type-tag>
            </type-pointer>
          </function-parameters>
        </type-function>
        <parameters>
          <variable name="msg" ref="0x408b2b80" loc="65:/opt/tinyos-2.1.2/tos/interfaces/Packet.nc">
            <type-pointer size="I:4" alignment="I:4">
              <type-tag size="I:41" alignment="I:1"><nx_struct-ref name="message_t" ref="0x406f2838"/>
                <typename><typedef-ref name="message_t" ref="0x406f1600"/></typename>
              </type-tag>
            </type-pointer>
          </variable>
        </parameters>
      </function>
      <function command="" provided="0" name="payloadLength" ref="0x408be6b8" loc="78:/opt/tinyos-2.1.2/tos/interfaces/Packet.nc">
        <documentation loc="67:/opt/tinyos-2.1.2/tos/interfaces/Packet.nc">
          <short>&#10; Return the length of the payload of msg.</short>
          <long>&#10; Return the length of the payload of msg. This value may be less&#10; than what maxPayloadLength() returns, if the packet is smaller than&#10; the MTU. If a communication component does not support variably&#10; sized data regions, then payloadLength() will always return&#10; the same value as maxPayloadLength(). &#10;&#10; @param  'message_t* ONE msg'    the packet to examine&#10; @return        the length of its current payload&#10;</long>
        </documentation>
        <interfacedef-ref qname="Packet"/>
        <type-function size="I:1" alignment="I:1">
          <type-int cname="unsigned char" unsigned="" size="I:1" alignment="I:1">
            <typename><typedef-ref name="uint8_t" ref="0x40218250"/></typename>
          </type-int>
          <function-parameters>
            <type-pointer size="I:4" alignment="I:4">
              <type-tag size="I:41" alignment="I:1"><nx_struct-ref name="message_t" ref="0x406f2838"/>
                <typename><typedef-ref name="message_t" ref="0x406f1600"/></typename>
              </type-tag>
            </type-pointer>
          </function-parameters>
        </type-function>
        <parameters>
          <variable name="msg" ref="0x408be560" loc="78:/opt/tinyos-2.1.2/tos/interfaces/Packet.nc">
            <type-pointer size="I:4" alignment="I:4">
              <type-tag size="I:41" alignment="I:1"><nx_struct-ref name="message_t" ref="0x406f2838"/>
                <typename><typedef-ref name="message_t" ref="0x406f1600"/></typename>
              </type-tag>
            </type-pointer>
          </variable>
        </parameters>
      </function>
      <function command="" provided="0" name="getPayload" ref="0x408bd648" loc="126:/opt/tinyos-2.1.2/tos/interfaces/Packet.nc">
        <documentation loc="109:/opt/tinyos-2.1.2/tos/interfaces/Packet.nc">
          <short>&#10; Return a pointer to a protocol's payload region in a packet.</short>
          <long>&#10; Return a pointer to a protocol's payload region in a packet.&#10; If the caller intends to write to the payload region then&#10; the &#60;tt>len&#60;/tt> parameter must reflect the maximum required&#10; length. If the caller (only) wants to read from the payload&#10; region, then &#60;tt>len&#60;/tt> may be set to the value of&#10; payloadLength(). If the payload region is smaller than &#10; &#60;tt>len&#60;/tt> this command returns NULL. The offset where&#10; the payload region starts within a packet is fixed, i.e. for&#10; a given &#60;tt>msg&#60;/tt> this command will always return the same&#10; pointer or NULL.&#10;&#10; @param 'message_t* ONE msg'   the packet &#10; @param len   the length of payload required&#10; @return 'void* COUNT_NOK(len)'     a pointer to the packet's data payload for this layer&#10;              or NULL if &#60;tt>len&#60;/tt> is too big&#10;</long>
        </documentation>
        <interfacedef-ref qname="Packet"/>
        <type-function size="I:1" alignment="I:1">
          <type-pointer size="I:4" alignment="I:4">
            <type-void size="I:1" alignment="I:1"></type-void>
          </type-pointer>
          <function-parameters>
            <type-pointer size="I:4" alignment="I:4">
              <type-tag size="I:41" alignment="I:1"><nx_struct-ref name="message_t" ref="0x406f2838"/>
                <typename><typedef-ref name="message_t" ref="0x406f1600"/></typename>
              </type-tag>
            </type-pointer>
            <type-int cname="unsigned char" unsigned="" size="I:1" alignment="I:1">
              <typename><typedef-ref name="uint8_t" ref="0x40218250"/></typename>
            </type-int>
          </function-parameters>
        </type-function>
        <parameters>
          <variable name="msg" ref="0x408bd2e8" loc="126:/opt/tinyos-2.1.2/tos/interfaces/Packet.nc">
            <type-pointer size="I:4" alignment="I:4">
              <type-tag size="I:41" alignment="I:1"><nx_struct-ref name="message_t" ref="0x406f2838"/>
                <typename><typedef-ref name="message_t" ref="0x406f1600"/></typename>
              </type-tag>
            </type-pointer>
          </variable>
          <variable name="len" ref="0x408bd4c8" loc="126:/opt/tinyos-2.1.2/tos/interfaces/Packet.nc">
            <type-int cname="unsigned char" unsigned="" size="I:1" alignment="I:1">
              <typename><typedef-ref name="uint8_t" ref="0x40218250"/></typename>
            </type-int>
          </variable>
        </parameters>
      </function>
      <function command="" provided="0" name="maxPayloadLength" ref="0x408bfce8" loc="106:/opt/tinyos-2.1.2/tos/interfaces/Packet.nc">
        <documentation loc="96:/opt/tinyos-2.1.2/tos/interfaces/Packet.nc">
          <short>&#10; Return the maximum payload length that this communication layer&#10; can provide.</short>
          <long>&#10; Return the maximum payload length that this communication layer&#10; can provide. Note that, depending on protocol fields, a given&#10; request to send a packet may not be able to send the maximum&#10; payload length (e.g., if there are variable length&#10; fields). Protocols may provide specialized interfaces for these&#10; circumstances.&#10;&#10; @return   the maximum size payload allowed by this layer&#10;</long>
        </documentation>
        <interfacedef-ref qname="Packet"/>
        <type-function size="I:1" alignment="I:1">
          <type-int cname="unsigned char" unsigned="" size="I:1" alignment="I:1">
            <typename><typedef-ref name="uint8_t" ref="0x40218250"/></typename>
          </type-int>
          <function-parameters>
          </function-parameters>
        </type-function>
        <parameters>
        </parameters>
      </function>
      <function command="" provided="0" name="setPayloadLength" ref="0x408bf350" loc="94:/opt/tinyos-2.1.2/tos/interfaces/Packet.nc">
        <documentation loc="80:/opt/tinyos-2.1.2/tos/interfaces/Packet.nc">
          <short>&#10; Set the length field of the packet.</short>
          <long>&#10; Set the length field of the packet. This value is not checked&#10; for validity (e.g., if it is larger than the maximum payload&#10; size). This command is not used when sending packets, as calls&#10; to send include a length parameter. Rather, it is used by&#10; components, such as queues, that need to buffer requests to&#10; send.  This command allows the component to store the length&#10; specified in the request and later recover it when actually&#10; sending.&#10;&#10; @param 'message_t* ONE msg'   the packet&#10; @param len   the value to set its length field to&#10;</long>
        </documentation>
        <interfacedef-ref qname="Packet"/>
        <type-function size="I:1" alignment="I:1">
          <type-void size="I:1" alignment="I:1"></type-void>
          <function-parameters>
            <type-pointer size="I:4" alignment="I:4">
              <type-tag size="I:41" alignment="I:1"><nx_struct-ref name="message_t" ref="0x406f2838"/>
                <typename><typedef-ref name="message_t" ref="0x406f1600"/></typename>
              </type-tag>
            </type-pointer>
            <type-int cname="unsigned char" unsigned="" size="I:1" alignment="I:1">
              <typename><typedef-ref name="uint8_t" ref="0x40218250"/></typename>
            </type-int>
          </function-parameters>
        </type-function>
        <parameters>
          <variable name="msg" ref="0x408bf010" loc="94:/opt/tinyos-2.1.2/tos/interfaces/Packet.nc">
            <type-pointer size="I:4" alignment="I:4">
              <type-tag size="I:41" alignment="I:1"><nx_struct-ref name="message_t" ref="0x406f2838"/>
                <typename><typedef-ref name="message_t" ref="0x406f1600"/></typename>
              </type-tag>
            </type-pointer>
          </variable>
          <variable name="len" ref="0x408bf1f0" loc="94:/opt/tinyos-2.1.2/tos/interfaces/Packet.nc">
            <type-int cname="unsigned char" unsigned="" size="I:1" alignment="I:1">
              <typename><typedef-ref name="uint8_t" ref="0x40218250"/></typename>
            </type-int>
          </variable>
        </parameters>
      </function>
    </interfacedef>
    <interfacedef qname="LocalTime" loc="53:/opt/tinyos-2.1.2/tos/lib/timer/LocalTime.nc">
      <documentation loc="36:/opt/tinyos-2.1.2/tos/lib/timer/LocalTime.nc">
        <short>&#10; A LocalTime interface counts time in some units.</short>
        <long>&#10; A LocalTime interface counts time in some units. If you need to detect&#10; time overflow, you should use a component offering the Counter&#10; interface.&#10;&#10; &#60;p>The LocalTime interface is parameterised by its &#34;precision&#34;&#10; (milliseconds, microseconds, etc), identified by a type. This prevents,&#10; e.g., unintentionally mixing components expecting milliseconds with&#10; those expecting microseconds as those interfaces have a different type.&#10;&#10; &#60;p>See TEP102 for more details.&#10;&#10; @param precision_tag A type indicating the precision of this Counter.&#10;&#10; @author Cory Sharp &#60;cssharp@eecs.berkeley.edu>&#10;</long>
      </documentation>
      <parameters>
        <typedef name="precision_tag" ref="0x417a8ac0" loc="53:/opt/tinyos-2.1.2/tos/lib/timer/LocalTime.nc">
          <interfacedef-ref qname="LocalTime"/>
          <type-var size="U:" alignment="U:"><typedef-ref name="precision_tag" scoped="" ref="0x417a8ac0"/></type-var>
        </typedef>
      </parameters>
      <function command="" provided="0" name="get" ref="0x417a5010" loc="61:/opt/tinyos-2.1.2/tos/lib/timer/LocalTime.nc">
        <documentation loc="55:/opt/tinyos-2.1.2/tos/lib/timer/LocalTime.nc">
          <short> &#10; Return current time.</short>
          <long> &#10; Return current time. Time starts counting at boot - some time sources&#10; may stop counting while the processor is in low-power mode.&#10;&#10; @return Current time.&#10;</long>
        </documentation>
        <interfacedef-ref qname="LocalTime"/>
        <type-function size="I:1" alignment="I:1">
          <type-int cname="unsigned int" unsigned="" size="I:4" alignment="I:4">
            <typename><typedef-ref name="uint32_t" ref="0x402186b0"/></typename>
          </type-int>
          <function-parameters>
          </function-parameters>
        </type-function>
        <parameters>
        </parameters>
      </function>
    </interfacedef>
    <interfacedef qname="AMSend" loc="58:/opt/tinyos-2.1.2/tos/interfaces/AMSend.nc">
      <documentation loc="34:/opt/tinyos-2.1.2/tos/types/TinyError.h">
        <short>&#10; </short>
        <long>&#10; @author Phil Levis&#10; @author David Gay&#10; Revision:  $Revision: 1.12 $&#10;&#10; Defines global error codes for error_t in TinyOS.&#10;</long>
      </documentation>
      <function command="" provided="0" name="send" ref="0x408b3e78" loc="80:/opt/tinyos-2.1.2/tos/interfaces/AMSend.nc">
        <documentation loc="60:/opt/tinyos-2.1.2/tos/interfaces/AMSend.nc">
          <short> &#10; Send a packet with a data payload of &#60;tt>len&#60;/tt> to address&#10; &#60;tt>addr&#60;/tt>.</short>
          <long> &#10; Send a packet with a data payload of &#60;tt>len&#60;/tt> to address&#10; &#60;tt>addr&#60;/tt>. To determine the maximum available size, use the&#10; Packet interface of the component providing AMSend. If send&#10; returns SUCCESS, then the component will signal the sendDone&#10; event in the future; if send returns an error, it will not&#10; signal the event.  Note that a component may accept a send&#10; request which it later finds it cannot satisfy; in this case, it&#10; will signal sendDone with error code.&#10;&#10; @param addr   address to which to send the packet&#10; @param 'message_t* ONE msg'    the packet&#10; @param len    the length of the data in the packet payload&#10; @return       SUCCESS if the request to send succeeded and a&#10;               sendDone will be signaled later, EBUSY if the&#10;               abstraction cannot send now but will be able to&#10;               later, or FAIL if the communication layer is not&#10;               in a state that can send (e.g., off).&#10; @see          sendDone&#10;</long>
        </documentation>
        <interfacedef-ref qname="AMSend"/>
        <type-function size="I:1" alignment="I:1">
          <type-int cname="unsigned char" unsigned="" size="I:1" alignment="I:1">
            <typename><typedef-ref name="error_t" ref="0x405c8e98"/></typename>
          </type-int>
          <function-parameters>
            <type-int cname="unsigned short" unsigned="" size="I:2" alignment="I:2">
              <typename><typedef-ref name="am_addr_t" ref="0x406e8620"/></typename>
            </type-int>
            <type-pointer size="I:4" alignment="I:4">
              <type-tag size="I:41" alignment="I:1"><nx_struct-ref name="message_t" ref="0x406f2838"/>
                <typename><typedef-ref name="message_t" ref="0x406f1600"/></typename>
              </type-tag>
            </type-pointer>
            <type-int cname="unsigned char" unsigned="" size="I:1" alignment="I:1">
              <typename><typedef-ref name="uint8_t" ref="0x40218250"/></typename>
            </type-int>
          </function-parameters>
        </type-function>
        <parameters>
          <variable name="addr" ref="0x408b3918" loc="80:/opt/tinyos-2.1.2/tos/interfaces/AMSend.nc">
            <type-int cname="unsigned short" unsigned="" size="I:2" alignment="I:2">
              <typename><typedef-ref name="am_addr_t" ref="0x406e8620"/></typename>
            </type-int>
          </variable>
          <variable name="msg" ref="0x408b3b30" loc="80:/opt/tinyos-2.1.2/tos/interfaces/AMSend.nc">
            <type-pointer size="I:4" alignment="I:4">
              <type-tag size="I:41" alignment="I:1"><nx_struct-ref name="message_t" ref="0x406f2838"/>
                <typename><typedef-ref name="message_t" ref="0x406f1600"/></typename>
              </type-tag>
            </type-pointer>
          </variable>
          <variable name="len" ref="0x408b3d10" loc="80:/opt/tinyos-2.1.2/tos/interfaces/AMSend.nc">
            <type-int cname="unsigned char" unsigned="" size="I:1" alignment="I:1">
              <typename><typedef-ref name="uint8_t" ref="0x40218250"/></typename>
            </type-int>
          </variable>
        </parameters>
      </function>
      <function command="" provided="0" name="getPayload" ref="0x408aba88" loc="135:/opt/tinyos-2.1.2/tos/interfaces/AMSend.nc">
        <documentation loc="126:/opt/tinyos-2.1.2/tos/interfaces/AMSend.nc">
          <short>&#10; Return a pointer to a protocol's payload region in a packet.</short>
          <long>&#10; Return a pointer to a protocol's payload region in a packet.&#10; This command behaves identically to &#60;tt>Packet.getPayload&#60;/tt>&#10; (minus the length parameter) and is included in this interface&#10; as a convenience.&#10;&#10; @param  'message_t* ONE msg'    the packet&#10; @return 'void* COUNT(len)'      the payload of the packet&#10;</long>
        </documentation>
        <interfacedef-ref qname="AMSend"/>
        <type-function size="I:1" alignment="I:1">
          <type-pointer size="I:4" alignment="I:4">
            <type-void size="I:1" alignment="I:1"></type-void>
          </type-pointer>
          <function-parameters>
            <type-pointer size="I:4" alignment="I:4">
              <type-tag size="I:41" alignment="I:1"><nx_struct-ref name="message_t" ref="0x406f2838"/>
                <typename><typedef-ref name="message_t" ref="0x406f1600"/></typename>
              </type-tag>
            </type-pointer>
            <type-int cname="unsigned char" unsigned="" size="I:1" alignment="I:1">
              <typename><typedef-ref name="uint8_t" ref="0x40218250"/></typename>
            </type-int>
          </function-parameters>
        </type-function>
        <parameters>
          <variable name="msg" ref="0x408ab728" loc="135:/opt/tinyos-2.1.2/tos/interfaces/AMSend.nc">
            <type-pointer size="I:4" alignment="I:4">
              <type-tag size="I:41" alignment="I:1"><nx_struct-ref name="message_t" ref="0x406f2838"/>
                <typename><typedef-ref name="message_t" ref="0x406f1600"/></typename>
              </type-tag>
            </type-pointer>
          </variable>
          <variable name="len" ref="0x408ab908" loc="135:/opt/tinyos-2.1.2/tos/interfaces/AMSend.nc">
            <type-int cname="unsigned char" unsigned="" size="I:1" alignment="I:1">
              <typename><typedef-ref name="uint8_t" ref="0x40218250"/></typename>
            </type-int>
          </variable>
        </parameters>
      </function>
      <function command="" provided="0" name="maxPayloadLength" ref="0x408ab1c8" loc="123:/opt/tinyos-2.1.2/tos/interfaces/AMSend.nc">
        <documentation loc="113:/opt/tinyos-2.1.2/tos/interfaces/AMSend.nc">
          <short>&#10; Return the maximum payload length that this communication layer&#10; can provide.</short>
          <long>&#10; Return the maximum payload length that this communication layer&#10; can provide. This command behaves identically to&#10; &#60;tt>Packet.maxPayloadLength&#60;/tt> and is included in this&#10; interface as a convenience.&#10;&#10; @return the maximum payload length&#10;</long>
        </documentation>
        <interfacedef-ref qname="AMSend"/>
        <type-function size="I:1" alignment="I:1">
          <type-int cname="unsigned char" unsigned="" size="I:1" alignment="I:1">
            <typename><typedef-ref name="uint8_t" ref="0x40218250"/></typename>
          </type-int>
          <function-parameters>
          </function-parameters>
        </type-function>
        <parameters>
        </parameters>
      </function>
      <function command="" provided="0" name="cancel" ref="0x408acb80" loc="96:/opt/tinyos-2.1.2/tos/interfaces/AMSend.nc">
        <documentation loc="82:/opt/tinyos-2.1.2/tos/interfaces/AMSend.nc">
          <short>&#10; Cancel a requested transmission.</short>
          <long>&#10; Cancel a requested transmission. Returns SUCCESS if the &#10; transmission was canceled properly (not sent in its&#10; entirety). Note that the component may not know&#10; if the send was successfully canceled, if the radio is&#10; handling much of the logic; in this case, a component&#10; should be conservative and return an appropriate error code.&#10; A successful call to cancel must always result in a &#10; sendFailed event, and never a sendSucceeded event.&#10; &#10; @param  'message_t* ONE msg'    the packet whose transmission should be cancelled.&#10; @return SUCCESS if the transmission was cancelled, FAIL otherwise.&#10; @see    sendDone&#10;</long>
        </documentation>
        <interfacedef-ref qname="AMSend"/>
        <type-function size="I:1" alignment="I:1">
          <type-int cname="unsigned char" unsigned="" size="I:1" alignment="I:1">
            <typename><typedef-ref name="error_t" ref="0x405c8e98"/></typename>
          </type-int>
          <function-parameters>
            <type-pointer size="I:4" alignment="I:4">
              <type-tag size="I:41" alignment="I:1"><nx_struct-ref name="message_t" ref="0x406f2838"/>
                <typename><typedef-ref name="message_t" ref="0x406f1600"/></typename>
              </type-tag>
            </type-pointer>
          </function-parameters>
        </type-function>
        <parameters>
          <variable name="msg" ref="0x408aca28" loc="96:/opt/tinyos-2.1.2/tos/interfaces/AMSend.nc">
            <type-pointer size="I:4" alignment="I:4">
              <type-tag size="I:41" alignment="I:1"><nx_struct-ref name="message_t" ref="0x406f2838"/>
                <typename><typedef-ref name="message_t" ref="0x406f1600"/></typename>
              </type-tag>
            </type-pointer>
          </variable>
        </parameters>
      </function>
      <function event="" provided="0" name="sendDone" ref="0x408aa898" loc="110:/opt/tinyos-2.1.2/tos/interfaces/AMSend.nc">
        <documentation loc="98:/opt/tinyos-2.1.2/tos/interfaces/AMSend.nc">
          <short> &#10; Signaled in response to an accepted send request.</short>
          <long> &#10; Signaled in response to an accepted send request. &#60;tt>msg&#60;/tt> is&#10; the message buffer sent, and &#60;tt>error&#60;/tt> indicates whether&#10; the send was successful.&#10;&#10; @param  'message_t* ONE msg'   the packet which was submitted as a send request&#10; @param  error SUCCESS if it was sent successfully, FAIL if it was not,&#10;               ECANCEL if it was cancelled&#10; @see send&#10; @see cancel&#10;</long>
        </documentation>
        <interfacedef-ref qname="AMSend"/>
        <type-function size="I:1" alignment="I:1">
          <type-void size="I:1" alignment="I:1"></type-void>
          <function-parameters>
            <type-pointer size="I:4" alignment="I:4">
              <type-tag size="I:41" alignment="I:1"><nx_struct-ref name="message_t" ref="0x406f2838"/>
                <typename><typedef-ref name="message_t" ref="0x406f1600"/></typename>
              </type-tag>
            </type-pointer>
            <type-int cname="unsigned char" unsigned="" size="I:1" alignment="I:1">
              <typename><typedef-ref name="error_t" ref="0x405c8e98"/></typename>
            </type-int>
          </function-parameters>
        </type-function>
        <parameters>
          <variable name="msg" ref="0x408aa540" loc="110:/opt/tinyos-2.1.2/tos/interfaces/AMSend.nc">
            <type-pointer size="I:4" alignment="I:4">
              <type-tag size="I:41" alignment="I:1"><nx_struct-ref name="message_t" ref="0x406f2838"/>
                <typename><typedef-ref name="message_t" ref="0x406f1600"/></typename>
              </type-tag>
            </type-pointer>
          </variable>
          <variable name="error" ref="0x408aa738" loc="110:/opt/tinyos-2.1.2/tos/interfaces/AMSend.nc">
            <type-int cname="unsigned char" unsigned="" size="I:1" alignment="I:1">
              <typename><typedef-ref name="error_t" ref="0x405c8e98"/></typename>
            </type-int>
          </variable>
        </parameters>
      </function>
    </interfacedef>
    <interfacedef qname="HplAtm128TimerCtrl8" loc="42:/opt/tinyos-2.1.2/tos/chips/atm128/timer/HplAtm128TimerCtrl8.nc">
      <documentation loc="34:/opt/tinyos-2.1.2/tos/chips/atm128/timer/HplAtm128TimerCtrl8.nc">
        <short>&#10; HPL Interface to Atmega128 8-bit timer control registers&#10;&#10; </short>
        <long>&#10; HPL Interface to Atmega128 8-bit timer control registers&#10;&#10; @author Martin Turon &#60;mturon@xbow.com>&#10;</long>
      </documentation>
      <function command="" provided="0" name="getControl" ref="0x40a16bb8" loc="45:/opt/tinyos-2.1.2/tos/chips/atm128/timer/HplAtm128TimerCtrl8.nc">
        <documentation loc="44:/opt/tinyos-2.1.2/tos/chips/atm128/timer/HplAtm128TimerCtrl8.nc">
          <short>Timer control register: Direct access</short>
        </documentation>
        <interfacedef-ref qname="HplAtm128TimerCtrl8"/>
        <type-function size="I:1" alignment="I:1">
          <type-tag size="I:1" alignment="I:1"><union-ref ref="0x4179f5b0"/>
            <typename><typedef-ref name="Atm128TimerControl_t" ref="0x4179f7d8"/></typename>
          </type-tag>
          <function-parameters>
          </function-parameters>
        </type-function>
        <parameters>
        </parameters>
      </function>
      <function command="" provided="0" name="getInterruptFlag" ref="0x417e41a8" loc="53:/opt/tinyos-2.1.2/tos/chips/atm128/timer/HplAtm128TimerCtrl8.nc">
        <documentation loc="52:/opt/tinyos-2.1.2/tos/chips/atm128/timer/HplAtm128TimerCtrl8.nc">
          <short>Interrupt flag register: Direct access</short>
        </documentation>
        <interfacedef-ref qname="HplAtm128TimerCtrl8"/>
        <type-function size="I:1" alignment="I:1">
          <type-tag size="I:1" alignment="I:1"><union-ref ref="0x41798840"/>
            <typename><typedef-ref name="Atm128_TIFR_t" ref="0x41798a68"/></typename>
          </type-tag>
          <function-parameters>
          </function-parameters>
        </type-function>
        <parameters>
        </parameters>
      </function>
      <function command="" provided="0" name="getInterruptMask" ref="0x417e56e0" loc="49:/opt/tinyos-2.1.2/tos/chips/atm128/timer/HplAtm128TimerCtrl8.nc">
        <documentation loc="48:/opt/tinyos-2.1.2/tos/chips/atm128/timer/HplAtm128TimerCtrl8.nc">
          <short>Interrupt mask register: Direct access</short>
        </documentation>
        <interfacedef-ref qname="HplAtm128TimerCtrl8"/>
        <type-function size="I:1" alignment="I:1">
          <type-tag size="I:1" alignment="I:1"><union-ref ref="0x4179a130"/>
            <typename><typedef-ref name="Atm128_TIMSK_t" ref="0x4179a358"/></typename>
          </type-tag>
          <function-parameters>
          </function-parameters>
        </type-function>
        <parameters>
        </parameters>
      </function>
      <function command="" provided="0" name="setInterruptMask" ref="0x417e5ce8" loc="50:/opt/tinyos-2.1.2/tos/chips/atm128/timer/HplAtm128TimerCtrl8.nc">
        <interfacedef-ref qname="HplAtm128TimerCtrl8"/>
        <type-function size="I:1" alignment="I:1">
          <type-void size="I:1" alignment="I:1"></type-void>
          <function-parameters>
            <type-tag size="I:1" alignment="I:1"><union-ref ref="0x4179a130"/>
              <typename><typedef-ref name="Atm128_TIMSK_t" ref="0x4179a358"/></typename>
            </type-tag>
          </function-parameters>
        </type-function>
        <parameters>
          <variable name="mask" ref="0x417e5b90" loc="50:/opt/tinyos-2.1.2/tos/chips/atm128/timer/HplAtm128TimerCtrl8.nc">
            <type-tag size="I:1" alignment="I:1"><union-ref ref="0x4179a130"/>
              <typename><typedef-ref name="Atm128_TIMSK_t" ref="0x4179a358"/></typename>
            </type-tag>
          </variable>
        </parameters>
      </function>
      <function command="" provided="0" name="setInterruptFlag" ref="0x417e47b0" loc="54:/opt/tinyos-2.1.2/tos/chips/atm128/timer/HplAtm128TimerCtrl8.nc">
        <interfacedef-ref qname="HplAtm128TimerCtrl8"/>
        <type-function size="I:1" alignment="I:1">
          <type-void size="I:1" alignment="I:1"></type-void>
          <function-parameters>
            <type-tag size="I:1" alignment="I:1"><union-ref ref="0x41798840"/>
              <typename><typedef-ref name="Atm128_TIFR_t" ref="0x41798a68"/></typename>
            </type-tag>
          </function-parameters>
        </type-function>
        <parameters>
          <variable name="flags" ref="0x417e4658" loc="54:/opt/tinyos-2.1.2/tos/chips/atm128/timer/HplAtm128TimerCtrl8.nc">
            <type-tag size="I:1" alignment="I:1"><union-ref ref="0x41798840"/>
              <typename><typedef-ref name="Atm128_TIFR_t" ref="0x41798a68"/></typename>
            </type-tag>
          </variable>
        </parameters>
      </function>
      <function command="" provided="0" name="setControl" ref="0x417e5228" loc="46:/opt/tinyos-2.1.2/tos/chips/atm128/timer/HplAtm128TimerCtrl8.nc">
        <interfacedef-ref qname="HplAtm128TimerCtrl8"/>
        <type-function size="I:1" alignment="I:1">
          <type-void size="I:1" alignment="I:1"></type-void>
          <function-parameters>
            <type-tag size="I:1" alignment="I:1"><union-ref ref="0x4179f5b0"/>
              <typename><typedef-ref name="Atm128TimerControl_t" ref="0x4179f7d8"/></typename>
            </type-tag>
          </function-parameters>
        </type-function>
        <parameters>
          <variable name="control" ref="0x417e50d0" loc="46:/opt/tinyos-2.1.2/tos/chips/atm128/timer/HplAtm128TimerCtrl8.nc">
            <type-tag size="I:1" alignment="I:1"><union-ref ref="0x4179f5b0"/>
              <typename><typedef-ref name="Atm128TimerControl_t" ref="0x4179f7d8"/></typename>
            </type-tag>
          </variable>
        </parameters>
      </function>
    </interfacedef>
    <interfacedef qname="Send" loc="55:/opt/tinyos-2.1.2/tos/interfaces/Send.nc">
      <documentation loc="34:/opt/tinyos-2.1.2/tos/types/TinyError.h">
        <short>&#10; </short>
        <long>&#10; @author Phil Levis&#10; @author David Gay&#10; Revision:  $Revision: 1.12 $&#10;&#10; Defines global error codes for error_t in TinyOS.&#10;</long>
      </documentation>
      <function command="" provided="0" name="send" ref="0x418d4858" loc="75:/opt/tinyos-2.1.2/tos/interfaces/Send.nc">
        <documentation loc="57:/opt/tinyos-2.1.2/tos/interfaces/Send.nc">
          <short> &#10; Send a packet with a data payload of &#60;tt>len&#60;/tt>.</short>
          <long> &#10; Send a packet with a data payload of &#60;tt>len&#60;/tt>. To determine&#10; the maximum available size, use the Packet interface of the&#10; component providing Send. If send returns SUCCESS, then the&#10; component will signal the sendDone event in the future; if send&#10; returns an error, it will not signal sendDone.  Note that a&#10; component may accept a send request which it later finds it&#10; cannot satisfy; in this case, it will signal sendDone with an&#10; appropriate error code.&#10;&#10; @param   'message_t* ONE msg'     the packet to send&#10; @param   len     the length of the packet payload&#10; @return          SUCCESS if the request was accepted and will issue&#10;                  a sendDone event, EBUSY if the component cannot accept&#10;                  the request now but will be able to later, FAIL&#10;                  if the stack is in a state that cannot accept requests&#10;                  (e.g., it's off).&#10;</long>
        </documentation>
        <interfacedef-ref qname="Send"/>
        <type-function size="I:1" alignment="I:1">
          <type-int cname="unsigned char" unsigned="" size="I:1" alignment="I:1">
            <typename><typedef-ref name="error_t" ref="0x405c8e98"/></typename>
          </type-int>
          <function-parameters>
            <type-pointer size="I:4" alignment="I:4">
              <type-tag size="I:41" alignment="I:1"><nx_struct-ref name="message_t" ref="0x406f2838"/>
                <typename><typedef-ref name="message_t" ref="0x406f1600"/></typename>
              </type-tag>
            </type-pointer>
            <type-int cname="unsigned char" unsigned="" size="I:1" alignment="I:1">
              <typename><typedef-ref name="uint8_t" ref="0x40218250"/></typename>
            </type-int>
          </function-parameters>
        </type-function>
        <parameters>
          <variable name="msg" ref="0x418d4518" loc="75:/opt/tinyos-2.1.2/tos/interfaces/Send.nc">
            <type-pointer size="I:4" alignment="I:4">
              <type-tag size="I:41" alignment="I:1"><nx_struct-ref name="message_t" ref="0x406f2838"/>
                <typename><typedef-ref name="message_t" ref="0x406f1600"/></typename>
              </type-tag>
            </type-pointer>
          </variable>
          <variable name="len" ref="0x418d46f8" loc="75:/opt/tinyos-2.1.2/tos/interfaces/Send.nc">
            <type-int cname="unsigned char" unsigned="" size="I:1" alignment="I:1">
              <typename><typedef-ref name="uint8_t" ref="0x40218250"/></typename>
            </type-int>
          </variable>
        </parameters>
      </function>
      <function command="" provided="0" name="getPayload" ref="0x418ce370" loc="125:/opt/tinyos-2.1.2/tos/interfaces/Send.nc">
        <documentation loc="115:/opt/tinyos-2.1.2/tos/interfaces/Send.nc">
          <short>&#10; Return a pointer to a protocol's payload region in a packet which&#10; at least a certain length.</short>
          <long>&#10; Return a pointer to a protocol's payload region in a packet which&#10; at least a certain length.  If the payload region is smaller than&#10; the len parameter, then getPayload returns NULL. This command&#10; behaves identicallt to &#60;tt>Packet.getPayload&#60;/tt> and is&#10; included in this interface as a convenience.&#10;&#10; @param   'message_t* ONE msg'    the packet&#10; @return  'void* COUNT_NOK(len)'  a pointer to the packet's payload&#10;</long>
        </documentation>
        <interfacedef-ref qname="Send"/>
        <type-function size="I:1" alignment="I:1">
          <type-pointer size="I:4" alignment="I:4">
            <type-void size="I:1" alignment="I:1"></type-void>
          </type-pointer>
          <function-parameters>
            <type-pointer size="I:4" alignment="I:4">
              <type-tag size="I:41" alignment="I:1"><nx_struct-ref name="message_t" ref="0x406f2838"/>
                <typename><typedef-ref name="message_t" ref="0x406f1600"/></typename>
              </type-tag>
            </type-pointer>
            <type-int cname="unsigned char" unsigned="" size="I:1" alignment="I:1">
              <typename><typedef-ref name="uint8_t" ref="0x40218250"/></typename>
            </type-int>
          </function-parameters>
        </type-function>
        <parameters>
          <variable name="msg" ref="0x418ce010" loc="125:/opt/tinyos-2.1.2/tos/interfaces/Send.nc">
            <type-pointer size="I:4" alignment="I:4">
              <type-tag size="I:41" alignment="I:1"><nx_struct-ref name="message_t" ref="0x406f2838"/>
                <typename><typedef-ref name="message_t" ref="0x406f1600"/></typename>
              </type-tag>
            </type-pointer>
          </variable>
          <variable name="len" ref="0x418ce1f0" loc="125:/opt/tinyos-2.1.2/tos/interfaces/Send.nc">
            <type-int cname="unsigned char" unsigned="" size="I:1" alignment="I:1">
              <typename><typedef-ref name="uint8_t" ref="0x40218250"/></typename>
            </type-int>
          </variable>
        </parameters>
      </function>
      <function command="" provided="0" name="maxPayloadLength" ref="0x418cfa90" loc="112:/opt/tinyos-2.1.2/tos/interfaces/Send.nc">
        <documentation loc="102:/opt/tinyos-2.1.2/tos/interfaces/Send.nc">
          <short>&#10; Return the maximum payload length that this communication layer&#10; can provide.</short>
          <long>&#10; Return the maximum payload length that this communication layer&#10; can provide. This command behaves identically to&#10; &#60;tt>Packet.maxPayloadLength&#60;/tt> and is included in this&#10; interface as a convenience.&#10;&#10; @return  the maximum payload length&#10;</long>
        </documentation>
        <interfacedef-ref qname="Send"/>
        <type-function size="I:1" alignment="I:1">
          <type-int cname="unsigned char" unsigned="" size="I:1" alignment="I:1">
            <typename><typedef-ref name="uint8_t" ref="0x40218250"/></typename>
          </type-int>
          <function-parameters>
          </function-parameters>
        </type-function>
        <parameters>
        </parameters>
      </function>
      <function command="" provided="0" name="cancel" ref="0x418d04c0" loc="89:/opt/tinyos-2.1.2/tos/interfaces/Send.nc">
        <documentation loc="77:/opt/tinyos-2.1.2/tos/interfaces/Send.nc">
          <short>&#10; Cancel a requested transmission.</short>
          <long>&#10; Cancel a requested transmission. Returns SUCCESS if the &#10; transmission was cancelled properly (not sent in its&#10; entirety). Note that the component may not know&#10; if the send was successfully cancelled, if the radio is&#10; handling much of the logic; in this case, a component&#10; should be conservative and return an appropriate error code.&#10;&#10; @param   'message_t* ONE msg'    the packet whose transmission should be cancelled&#10; @return         SUCCESS if the packet was successfully cancelled, FAIL&#10;                 otherwise&#10;</long>
        </documentation>
        <interfacedef-ref qname="Send"/>
        <type-function size="I:1" alignment="I:1">
          <type-int cname="unsigned char" unsigned="" size="I:1" alignment="I:1">
            <typename><typedef-ref name="error_t" ref="0x405c8e98"/></typename>
          </type-int>
          <function-parameters>
            <type-pointer size="I:4" alignment="I:4">
              <type-tag size="I:41" alignment="I:1"><nx_struct-ref name="message_t" ref="0x406f2838"/>
                <typename><typedef-ref name="message_t" ref="0x406f1600"/></typename>
              </type-tag>
            </type-pointer>
          </function-parameters>
        </type-function>
        <parameters>
          <variable name="msg" ref="0x418d0368" loc="89:/opt/tinyos-2.1.2/tos/interfaces/Send.nc">
            <type-pointer size="I:4" alignment="I:4">
              <type-tag size="I:41" alignment="I:1"><nx_struct-ref name="message_t" ref="0x406f2838"/>
                <typename><typedef-ref name="message_t" ref="0x406f1600"/></typename>
              </type-tag>
            </type-pointer>
          </variable>
        </parameters>
      </function>
      <function event="" provided="0" name="sendDone" ref="0x418cf170" loc="100:/opt/tinyos-2.1.2/tos/interfaces/Send.nc">
        <documentation loc="91:/opt/tinyos-2.1.2/tos/interfaces/Send.nc">
          <short> &#10; Signaled in response to an accepted send request.</short>
          <long> &#10; Signaled in response to an accepted send request. &#60;tt>msg&#60;/tt>&#10; is the sent buffer, and &#60;tt>error&#60;/tt> indicates whether the&#10; send was succesful, and if not, the cause of the failure.&#10; &#10; @param 'message_t* ONE msg'   the message which was requested to send&#10; @param error SUCCESS if it was transmitted successfully, FAIL if&#10;              it was not, ECANCEL if it was cancelled via &#60;tt>cancel&#60;/tt>&#10;</long>
        </documentation>
        <interfacedef-ref qname="Send"/>
        <type-function size="I:1" alignment="I:1">
          <type-void size="I:1" alignment="I:1"></type-void>
          <function-parameters>
            <type-pointer size="I:4" alignment="I:4">
              <type-tag size="I:41" alignment="I:1"><nx_struct-ref name="message_t" ref="0x406f2838"/>
                <typename><typedef-ref name="message_t" ref="0x406f1600"/></typename>
              </type-tag>
            </type-pointer>
            <type-int cname="unsigned char" unsigned="" size="I:1" alignment="I:1">
              <typename><typedef-ref name="error_t" ref="0x405c8e98"/></typename>
            </type-int>
          </function-parameters>
        </type-function>
        <parameters>
          <variable name="msg" ref="0x418d0e00" loc="100:/opt/tinyos-2.1.2/tos/interfaces/Send.nc">
            <type-pointer size="I:4" alignment="I:4">
              <type-tag size="I:41" alignment="I:1"><nx_struct-ref name="message_t" ref="0x406f2838"/>
                <typename><typedef-ref name="message_t" ref="0x406f1600"/></typename>
              </type-tag>
            </type-pointer>
          </variable>
          <variable name="error" ref="0x418cf010" loc="100:/opt/tinyos-2.1.2/tos/interfaces/Send.nc">
            <type-int cname="unsigned char" unsigned="" size="I:1" alignment="I:1">
              <typename><typedef-ref name="error_t" ref="0x405c8e98"/></typename>
            </type-int>
          </variable>
        </parameters>
      </function>
    </interfacedef>
    <interfacedef qname="ActiveMessageAddress" loc="38:/opt/tinyos-2.1.2/tos/interfaces/ActiveMessageAddress.nc">
      <documentation loc="34:/opt/tinyos-2.1.2/tos/interfaces/ActiveMessageAddress.nc">
        <short>&#10; </short>
        <long>&#10; @author Phil Levis&#10; @author David Moss&#10;</long>
      </documentation>
      <function command="" provided="0" name="amAddress" ref="0x409c8e90" loc="50:/opt/tinyos-2.1.2/tos/interfaces/ActiveMessageAddress.nc">
        <documentation loc="47:/opt/tinyos-2.1.2/tos/interfaces/ActiveMessageAddress.nc">
          <short>&#10; </short>
          <long>&#10; @return the active message address of this node&#10;</long>
        </documentation>
        <interfacedef-ref qname="ActiveMessageAddress"/>
        <type-function size="I:1" alignment="I:1">
          <type-int cname="unsigned short" unsigned="" size="I:2" alignment="I:2">
            <typename><typedef-ref name="am_addr_t" ref="0x406e8620"/></typename>
          </type-int>
          <function-parameters>
          </function-parameters>
        </type-function>
        <parameters>
        </parameters>
      </function>
      <function event="" provided="0" name="changed" ref="0x409c5720" loc="60:/opt/tinyos-2.1.2/tos/interfaces/ActiveMessageAddress.nc">
        <documentation loc="57:/opt/tinyos-2.1.2/tos/interfaces/ActiveMessageAddress.nc">
          <short>&#10; Notification that the address or group settings changed.</short>
          <long>&#10; Notification that the address or group settings changed.&#10;</long>
        </documentation>
        <interfacedef-ref qname="ActiveMessageAddress"/>
        <type-function size="I:1" alignment="I:1">
          <type-void size="I:1" alignment="I:1"></type-void>
          <function-parameters>
          </function-parameters>
        </type-function>
        <parameters>
        </parameters>
      </function>
      <function command="" provided="0" name="amGroup" ref="0x409c5320" loc="55:/opt/tinyos-2.1.2/tos/interfaces/ActiveMessageAddress.nc">
        <documentation loc="52:/opt/tinyos-2.1.2/tos/interfaces/ActiveMessageAddress.nc">
          <short>&#10; </short>
          <long>&#10; @return the group address of this node&#10;</long>
        </documentation>
        <interfacedef-ref qname="ActiveMessageAddress"/>
        <type-function size="I:1" alignment="I:1">
          <type-int cname="unsigned char" unsigned="" size="I:1" alignment="I:1">
            <typename><typedef-ref name="am_group_t" ref="0x406e83c0"/></typename>
          </type-int>
          <function-parameters>
          </function-parameters>
        </type-function>
        <parameters>
        </parameters>
      </function>
      <function command="" provided="0" name="setAddress" ref="0x409c89a0" loc="45:/opt/tinyos-2.1.2/tos/interfaces/ActiveMessageAddress.nc">
        <documentation loc="40:/opt/tinyos-2.1.2/tos/interfaces/ActiveMessageAddress.nc">
          <short>&#10; Set the active message address of this node&#10; </short>
          <long>&#10; Set the active message address of this node&#10; @param group The node's group ID&#10; @param addr The node's active message address&#10;</long>
        </documentation>
        <interfacedef-ref qname="ActiveMessageAddress"/>
        <type-function size="I:1" alignment="I:1">
          <type-void size="I:1" alignment="I:1"></type-void>
          <function-parameters>
            <type-int cname="unsigned char" unsigned="" size="I:1" alignment="I:1">
              <typename><typedef-ref name="am_group_t" ref="0x406e83c0"/></typename>
            </type-int>
            <type-int cname="unsigned short" unsigned="" size="I:2" alignment="I:2">
              <typename><typedef-ref name="am_addr_t" ref="0x406e8620"/></typename>
            </type-int>
          </function-parameters>
        </type-function>
        <parameters>
          <variable name="group" ref="0x409c8638" loc="45:/opt/tinyos-2.1.2/tos/interfaces/ActiveMessageAddress.nc">
            <type-int cname="unsigned char" unsigned="" size="I:1" alignment="I:1">
              <typename><typedef-ref name="am_group_t" ref="0x406e83c0"/></typename>
            </type-int>
          </variable>
          <variable name="addr" ref="0x409c8840" loc="45:/opt/tinyos-2.1.2/tos/interfaces/ActiveMessageAddress.nc">
            <type-int cname="unsigned short" unsigned="" size="I:2" alignment="I:2">
              <typename><typedef-ref name="am_addr_t" ref="0x406e8620"/></typename>
            </type-int>
          </variable>
        </parameters>
      </function>
    </interfacedef>
    <interfacedef qname="Alarm" loc="56:/opt/tinyos-2.1.2/tos/lib/timer/Alarm.nc">
      <documentation loc="36:/opt/tinyos-2.1.2/tos/lib/timer/Alarm.nc">
        <short>&#10; An Alarm is a low-level interface intended for precise timing.</short>
        <long>&#10; An Alarm is a low-level interface intended for precise timing.&#10;&#10; &#60;p>An Alarm is parameterised by its &#34;precision&#34; (milliseconds,&#10; microseconds, etc), identified by a type. This prevents, e.g.,&#10; unintentionally mixing components expecting milliseconds with those&#10; expecting microseconds as those interfaces have a different type.&#10;&#10; &#60;p>An Alarm's second parameter is its &#34;width&#34;, i.e., the number of&#10; bits used to represent time values. Width is indicated by including&#10; the appropriate size integer type as an Alarm parameter.&#10;&#10; &#60;p>See TEP102 for more details.&#10;&#10; @param precision_tag A type indicating the precision of this Alarm.&#10; @param size_type An integer type representing time values for this Alarm.&#10;&#10; @author Cory Sharp &#60;cssharp@eecs.berkeley.edu>&#10;</long>
      </documentation>
      <parameters>
        <typedef name="precision_tag" ref="0x40a343b8" loc="56:/opt/tinyos-2.1.2/tos/lib/timer/Alarm.nc">
          <interfacedef-ref qname="Alarm"/>
          <type-var size="U:" alignment="U:"><typedef-ref name="precision_tag" scoped="" ref="0x40a343b8"/></type-var>
        </typedef>
        <typedef name="size_type" ref="0x40a34520" loc="56:/opt/tinyos-2.1.2/tos/lib/timer/Alarm.nc">
          <interfacedef-ref qname="Alarm"/>
          <type-var size="U:" alignment="U:"><typedef-ref name="size_type" scoped="" ref="0x40a34520"/></type-var>
        </typedef>
      </parameters>
      <function command="" provided="0" name="getNow" ref="0x40a31810" loc="109:/opt/tinyos-2.1.2/tos/lib/timer/Alarm.nc">
        <documentation loc="105:/opt/tinyos-2.1.2/tos/lib/timer/Alarm.nc">
          <short>&#10; Return the current time.</short>
          <long>&#10; Return the current time.&#10; @return Current time.&#10;</long>
        </documentation>
        <interfacedef-ref qname="Alarm"/>
        <type-function size="I:1" alignment="I:1">
          <type-var size="U:" alignment="U:"><typedef-ref name="size_type" scoped="" ref="0x40a34520"/></type-var>
          <function-parameters>
          </function-parameters>
        </type-function>
        <parameters>
        </parameters>
      </function>
      <function event="" provided="0" name="fired" ref="0x40a334d0" loc="78:/opt/tinyos-2.1.2/tos/lib/timer/Alarm.nc">
        <documentation loc="75:/opt/tinyos-2.1.2/tos/lib/timer/Alarm.nc">
          <short>&#10; Signaled when the alarm expires.</short>
          <long>&#10; Signaled when the alarm expires.&#10;</long>
        </documentation>
        <interfacedef-ref qname="Alarm"/>
        <type-function size="I:1" alignment="I:1">
          <type-void size="I:1" alignment="I:1"></type-void>
          <function-parameters>
          </function-parameters>
        </type-function>
        <parameters>
        </parameters>
      </function>
      <function command="" provided="0" name="startAt" ref="0x40a311c8" loc="103:/opt/tinyos-2.1.2/tos/lib/timer/Alarm.nc">
        <documentation loc="90:/opt/tinyos-2.1.2/tos/lib/timer/Alarm.nc">
          <short>&#10; Set a single-short alarm to time t0+dt.</short>
          <long>&#10; Set a single-short alarm to time t0+dt. Replaces any current alarm&#10; time. The &#60;code>fired&#60;/code> will be signaled when the alarm expires.&#10; Alarms set in the past will fire &#34;soon&#34;.&#10; &#10; &#60;p>Because the current time may wrap around, it is possible to use&#10; values of t0 greater than the &#60;code>getNow&#60;/code>'s result. These&#10; values represent times in the past, i.e., the time at which getNow()&#10; would last of returned that value.&#10;&#10; @param t0 Base time for alarm.&#10; @param dt Alarm time as offset from t0.&#10;</long>
        </documentation>
        <interfacedef-ref qname="Alarm"/>
        <type-function size="I:1" alignment="I:1">
          <type-void size="I:1" alignment="I:1"></type-void>
          <function-parameters>
            <type-var size="U:" alignment="U:"><typedef-ref name="size_type" scoped="" ref="0x40a34520"/></type-var>
            <type-var size="U:" alignment="U:"><typedef-ref name="size_type" scoped="" ref="0x40a34520"/></type-var>
          </function-parameters>
        </type-function>
        <parameters>
          <variable name="t0" ref="0x40a33e48" loc="103:/opt/tinyos-2.1.2/tos/lib/timer/Alarm.nc">
            <type-var size="U:" alignment="U:"><typedef-ref name="size_type" scoped="" ref="0x40a34520"/></type-var>
          </variable>
          <variable name="dt" ref="0x40a31068" loc="103:/opt/tinyos-2.1.2/tos/lib/timer/Alarm.nc">
            <type-var size="U:" alignment="U:"><typedef-ref name="size_type" scoped="" ref="0x40a34520"/></type-var>
          </variable>
        </parameters>
      </function>
      <function command="" provided="0" name="isRunning" ref="0x40a33940" loc="88:/opt/tinyos-2.1.2/tos/lib/timer/Alarm.nc">
        <documentation loc="81:/opt/tinyos-2.1.2/tos/lib/timer/Alarm.nc">
          <short>&#10; Check if alarm is running.</short>
          <long>&#10; Check if alarm is running. Note that a FALSE return does not indicate&#10; that the &#60;code>fired&#60;/code> event will not be signaled (it may have&#10; already started executing, but not reached your code yet).&#10;&#10; @return TRUE if the alarm is still running.&#10;</long>
        </documentation>
        <interfacedef-ref qname="Alarm"/>
        <type-function size="I:1" alignment="I:1">
          <type-int cname="unsigned char" unsigned="" size="I:1" alignment="I:1">
            <typename><typedef-ref name="bool" ref="0x40521710"/></typename>
          </type-int>
          <function-parameters>
          </function-parameters>
        </type-function>
        <parameters>
        </parameters>
      </function>
      <function command="" provided="0" name="getAlarm" ref="0x40a31ca0" loc="116:/opt/tinyos-2.1.2/tos/lib/timer/Alarm.nc">
        <documentation loc="111:/opt/tinyos-2.1.2/tos/lib/timer/Alarm.nc">
          <short>&#10; Return the time the currently running alarm will fire or the time that&#10; the previously running alarm was set to fire.</short>
          <long>&#10; Return the time the currently running alarm will fire or the time that&#10; the previously running alarm was set to fire.&#10; @return Alarm time.&#10;</long>
        </documentation>
        <interfacedef-ref qname="Alarm"/>
        <type-function size="I:1" alignment="I:1">
          <type-var size="U:" alignment="U:"><typedef-ref name="size_type" scoped="" ref="0x40a34520"/></type-var>
          <function-parameters>
          </function-parameters>
        </type-function>
        <parameters>
        </parameters>
      </function>
      <function command="" provided="0" name="start" ref="0x40a34b50" loc="66:/opt/tinyos-2.1.2/tos/lib/timer/Alarm.nc">
        <documentation loc="59:/opt/tinyos-2.1.2/tos/lib/timer/Alarm.nc">
          <short>&#10; Set a single-short alarm to some time units in the future.</short>
          <long>&#10; Set a single-short alarm to some time units in the future. Replaces&#10; any current alarm time. Equivalent to start(getNow(), dt). The&#10; &#60;code>fired&#60;/code> will be signaled when the alarm expires.&#10;&#10; @param dt Time until the alarm fires.&#10;</long>
        </documentation>
        <interfacedef-ref qname="Alarm"/>
        <type-function size="I:1" alignment="I:1">
          <type-void size="I:1" alignment="I:1"></type-void>
          <function-parameters>
            <type-var size="U:" alignment="U:"><typedef-ref name="size_type" scoped="" ref="0x40a34520"/></type-var>
          </function-parameters>
        </type-function>
        <parameters>
          <variable name="dt" ref="0x40a349f8" loc="66:/opt/tinyos-2.1.2/tos/lib/timer/Alarm.nc">
            <type-var size="U:" alignment="U:"><typedef-ref name="size_type" scoped="" ref="0x40a34520"/></type-var>
          </variable>
        </parameters>
      </function>
      <function command="" provided="0" name="stop" ref="0x40a33070" loc="73:/opt/tinyos-2.1.2/tos/lib/timer/Alarm.nc">
        <documentation loc="68:/opt/tinyos-2.1.2/tos/lib/timer/Alarm.nc">
          <short>&#10; Cancel an alarm.</short>
          <long>&#10; Cancel an alarm. Note that the &#60;code>fired&#60;/code> event may have&#10; already been signaled (even if your code has not yet started&#10; executing).&#10;</long>
        </documentation>
        <interfacedef-ref qname="Alarm"/>
        <type-function size="I:1" alignment="I:1">
          <type-void size="I:1" alignment="I:1"></type-void>
          <function-parameters>
          </function-parameters>
        </type-function>
        <parameters>
        </parameters>
      </function>
    </interfacedef>
    <interfacedef qname="Init" loc="51:/opt/tinyos-2.1.2/tos/interfaces/Init.nc">
      <documentation loc="34:/opt/tinyos-2.1.2/tos/types/TinyError.h">
        <short>&#10; </short>
        <long>&#10; @author Phil Levis&#10; @author David Gay&#10; Revision:  $Revision: 1.12 $&#10;&#10; Defines global error codes for error_t in TinyOS.&#10;</long>
      </documentation>
      <function command="" provided="0" name="init" ref="0x4079e2a8" loc="62:/opt/tinyos-2.1.2/tos/interfaces/Init.nc">
        <documentation loc="53:/opt/tinyos-2.1.2/tos/interfaces/Init.nc">
          <short>&#10; Initialize this component.</short>
          <long>&#10; Initialize this component. Initialization should not assume that&#10; any component is running: init() cannot call any commands besides&#10; those that initialize other components.  &#10; &#10; @return SUCCESS if initialized properly, FAIL otherwise.&#10; @see TEP 107: Boot Sequence&#10;&#10;</long>
        </documentation>
        <interfacedef-ref qname="Init"/>
        <type-function size="I:1" alignment="I:1">
          <type-int cname="unsigned char" unsigned="" size="I:1" alignment="I:1">
            <typename><typedef-ref name="error_t" ref="0x405c8e98"/></typename>
          </type-int>
          <function-parameters>
          </function-parameters>
        </type-function>
        <parameters>
        </parameters>
      </function>
    </interfacedef>
    <interfacedef qname="HplAtm128Compare" loc="41:/opt/tinyos-2.1.2/tos/chips/atm128/timer/HplAtm128Compare.nc">
      <documentation loc="34:/opt/tinyos-2.1.2/tos/chips/atm128/timer/HplAtm128Compare.nc">
        <short>&#10; HPL Interface to Atmega128 compare registers.</short>
        <long>&#10; HPL Interface to Atmega128 compare registers.&#10; @param size_type Integer type of compare register&#10;&#10; @author Martin Turon &#60;mturon@xbow.com>&#10;</long>
      </documentation>
      <parameters>
        <typedef name="size_type" ref="0x417e75b0" loc="41:/opt/tinyos-2.1.2/tos/chips/atm128/timer/HplAtm128Compare.nc">
          <interfacedef-ref qname="HplAtm128Compare"/>
          <type-var size="U:" alignment="U:"><typedef-ref name="size_type" scoped="" ref="0x417e75b0"/></type-var>
        </typedef>
      </parameters>
      <function command="" provided="0" name="test" ref="0x417e04f0" loc="74:/opt/tinyos-2.1.2/tos/chips/atm128/timer/HplAtm128Compare.nc">
        <documentation loc="70:/opt/tinyos-2.1.2/tos/chips/atm128/timer/HplAtm128Compare.nc">
          <short> &#10; Did compare interrupt occur? &#10; </short>
          <long> &#10; Did compare interrupt occur? &#10; @return TRUE if compare triggered, FALSE otherwise&#10;</long>
        </documentation>
        <interfacedef-ref qname="HplAtm128Compare"/>
        <type-function size="I:1" alignment="I:1">
          <type-int cname="unsigned char" unsigned="" size="I:1" alignment="I:1">
            <typename><typedef-ref name="bool" ref="0x40521710"/></typename>
          </type-int>
          <function-parameters>
          </function-parameters>
        </type-function>
        <parameters>
        </parameters>
      </function>
      <function event="" provided="0" name="fired" ref="0x417e1498" loc="58:/opt/tinyos-2.1.2/tos/chips/atm128/timer/HplAtm128Compare.nc">
        <documentation loc="57:/opt/tinyos-2.1.2/tos/chips/atm128/timer/HplAtm128Compare.nc">
          <short> Signalled on  interrupt.</short>
          <long> Signalled on  interrupt. *</long>
        </documentation>
        <interfacedef-ref qname="HplAtm128Compare"/>
        <type-function size="I:1" alignment="I:1">
          <type-void size="I:1" alignment="I:1"></type-void>
          <function-parameters>
          </function-parameters>
        </type-function>
        <parameters>
        </parameters>
      </function>
      <function command="" provided="0" name="get" ref="0x417e7aa8" loc="48:/opt/tinyos-2.1.2/tos/chips/atm128/timer/HplAtm128Compare.nc">
        <documentation loc="44:/opt/tinyos-2.1.2/tos/chips/atm128/timer/HplAtm128Compare.nc">
          <short> &#10; Get the compare time to fire on.</short>
          <long> &#10; Get the compare time to fire on.&#10; @return  the compare time value&#10;</long>
        </documentation>
        <interfacedef-ref qname="HplAtm128Compare"/>
        <type-function size="I:1" alignment="I:1">
          <type-var size="U:" alignment="U:"><typedef-ref name="size_type" scoped="" ref="0x417e75b0"/></type-var>
          <function-parameters>
          </function-parameters>
        </type-function>
        <parameters>
        </parameters>
      </function>
      <function command="" provided="0" name="reset" ref="0x417e18a0" loc="62:/opt/tinyos-2.1.2/tos/chips/atm128/timer/HplAtm128Compare.nc">
        <documentation loc="61:/opt/tinyos-2.1.2/tos/chips/atm128/timer/HplAtm128Compare.nc">
          <short> Clear the compare interrupt flag.</short>
          <long> Clear the compare interrupt flag. *</long>
        </documentation>
        <interfacedef-ref qname="HplAtm128Compare"/>
        <type-function size="I:1" alignment="I:1">
          <type-void size="I:1" alignment="I:1"></type-void>
          <function-parameters>
          </function-parameters>
        </type-function>
        <parameters>
        </parameters>
      </function>
      <function command="" provided="0" name="isOn" ref="0x417e0950" loc="80:/opt/tinyos-2.1.2/tos/chips/atm128/timer/HplAtm128Compare.nc">
        <documentation loc="76:/opt/tinyos-2.1.2/tos/chips/atm128/timer/HplAtm128Compare.nc">
          <short> &#10; Is compare interrupt on?&#10; </short>
          <long> &#10; Is compare interrupt on?&#10; @return TRUE if compare enabled, FALSE otherwise&#10;</long>
        </documentation>
        <interfacedef-ref qname="HplAtm128Compare"/>
        <type-function size="I:1" alignment="I:1">
          <type-int cname="unsigned char" unsigned="" size="I:1" alignment="I:1">
            <typename><typedef-ref name="bool" ref="0x40521710"/></typename>
          </type-int>
          <function-parameters>
          </function-parameters>
        </type-function>
        <parameters>
        </parameters>
      </function>
      <function command="" provided="0" name="set" ref="0x417e1058" loc="54:/opt/tinyos-2.1.2/tos/chips/atm128/timer/HplAtm128Compare.nc">
        <documentation loc="50:/opt/tinyos-2.1.2/tos/chips/atm128/timer/HplAtm128Compare.nc">
          <short> &#10; Set the compare time to fire on.</short>
          <long> &#10; Set the compare time to fire on.&#10; @param t     the compare time to set&#10;</long>
        </documentation>
        <interfacedef-ref qname="HplAtm128Compare"/>
        <type-function size="I:1" alignment="I:1">
          <type-void size="I:1" alignment="I:1"></type-void>
          <function-parameters>
            <type-var size="U:" alignment="U:"><typedef-ref name="size_type" scoped="" ref="0x417e75b0"/></type-var>
          </function-parameters>
        </type-function>
        <parameters>
          <variable name="t" ref="0x417e7ed8" loc="54:/opt/tinyos-2.1.2/tos/chips/atm128/timer/HplAtm128Compare.nc">
            <type-var size="U:" alignment="U:"><typedef-ref name="size_type" scoped="" ref="0x417e75b0"/></type-var>
          </variable>
        </parameters>
      </function>
      <function command="" provided="0" name="start" ref="0x417e1ca8" loc="65:/opt/tinyos-2.1.2/tos/chips/atm128/timer/HplAtm128Compare.nc">
        <documentation loc="64:/opt/tinyos-2.1.2/tos/chips/atm128/timer/HplAtm128Compare.nc">
          <short> Enable the compare interrupt.</short>
          <long> Enable the compare interrupt. *</long>
        </documentation>
        <interfacedef-ref qname="HplAtm128Compare"/>
        <type-function size="I:1" alignment="I:1">
          <type-void size="I:1" alignment="I:1"></type-void>
          <function-parameters>
          </function-parameters>
        </type-function>
        <parameters>
        </parameters>
      </function>
      <function command="" provided="0" name="stop" ref="0x417e00c8" loc="68:/opt/tinyos-2.1.2/tos/chips/atm128/timer/HplAtm128Compare.nc">
        <documentation loc="67:/opt/tinyos-2.1.2/tos/chips/atm128/timer/HplAtm128Compare.nc">
          <short> Turn off comparee interrupts.</short>
          <long> Turn off comparee interrupts. *</long>
        </documentation>
        <interfacedef-ref qname="HplAtm128Compare"/>
        <type-function size="I:1" alignment="I:1">
          <type-void size="I:1" alignment="I:1"></type-void>
          <function-parameters>
          </function-parameters>
        </type-function>
        <parameters>
        </parameters>
      </function>
    </interfacedef>
    <interfacedef qname="Receive" loc="56:/opt/tinyos-2.1.2/tos/interfaces/Receive.nc">
      <documentation loc="34:/opt/tinyos-2.1.2/tos/types/TinyError.h">
        <short>&#10; </short>
        <long>&#10; @author Phil Levis&#10; @author David Gay&#10; Revision:  $Revision: 1.12 $&#10;&#10; Defines global error codes for error_t in TinyOS.&#10;</long>
      </documentation>
      <function event="" provided="0" name="receive" ref="0x408c49c0" loc="78:/opt/tinyos-2.1.2/tos/interfaces/Receive.nc">
        <documentation loc="58:/opt/tinyos-2.1.2/tos/interfaces/Receive.nc">
          <short>&#10; Receive a packet buffer, returning a buffer for the signaling&#10; component to use for the next reception.</short>
          <long>&#10; Receive a packet buffer, returning a buffer for the signaling&#10; component to use for the next reception. The return value&#10; can be the same as &#60;tt>msg&#60;/tt>, as long as the handling&#10; component copies out the data it needs.&#10;&#10; &#60;b>Note&#60;/b> that misuse of this interface is one of the most&#10; common bugs in TinyOS code. For example, if a component both calls a&#10; send on the passed message and returns it, then it is possible&#10; the buffer will be reused before the send occurs, overwriting&#10; the component's data. This would cause the mote to possibly&#10; instead send a packet it most recently received.&#10;&#10; @param  'message_t* ONE msg'        the receied packet&#10; @param  'void* COUNT(len) payload'  a pointer to the packet's payload&#10; @param  len      the length of the data region pointed to by payload&#10; @return 'message_t* ONE'              a packet buffer for the stack to use for the next&#10;                  received packet.&#10;</long>
        </documentation>
        <interfacedef-ref qname="Receive"/>
        <type-function size="I:1" alignment="I:1">
          <type-pointer size="I:4" alignment="I:4">
            <type-tag size="I:41" alignment="I:1"><nx_struct-ref name="message_t" ref="0x406f2838"/>
              <typename><typedef-ref name="message_t" ref="0x406f1600"/></typename>
            </type-tag>
          </type-pointer>
          <function-parameters>
            <type-pointer size="I:4" alignment="I:4">
              <type-tag size="I:41" alignment="I:1"><nx_struct-ref name="message_t" ref="0x406f2838"/>
                <typename><typedef-ref name="message_t" ref="0x406f1600"/></typename>
              </type-tag>
            </type-pointer>
            <type-pointer size="I:4" alignment="I:4">
              <type-void size="I:1" alignment="I:1"></type-void>
            </type-pointer>
            <type-int cname="unsigned char" unsigned="" size="I:1" alignment="I:1">
              <typename><typedef-ref name="uint8_t" ref="0x40218250"/></typename>
            </type-int>
          </function-parameters>
        </type-function>
        <parameters>
          <variable name="msg" ref="0x408c4478" loc="78:/opt/tinyos-2.1.2/tos/interfaces/Receive.nc">
            <type-pointer size="I:4" alignment="I:4">
              <type-tag size="I:41" alignment="I:1"><nx_struct-ref name="message_t" ref="0x406f2838"/>
                <typename><typedef-ref name="message_t" ref="0x406f1600"/></typename>
              </type-tag>
            </type-pointer>
          </variable>
          <variable name="payload" ref="0x408c4658" loc="78:/opt/tinyos-2.1.2/tos/interfaces/Receive.nc">
            <type-pointer size="I:4" alignment="I:4">
              <type-void size="I:1" alignment="I:1"></type-void>
            </type-pointer>
          </variable>
          <variable name="len" ref="0x408c4838" loc="78:/opt/tinyos-2.1.2/tos/interfaces/Receive.nc">
            <type-int cname="unsigned char" unsigned="" size="I:1" alignment="I:1">
              <typename><typedef-ref name="uint8_t" ref="0x40218250"/></typename>
            </type-int>
          </variable>
        </parameters>
      </function>
    </interfacedef>
    <interfacedef qname="SimMote" loc="42:/opt/tinyos-2.1.2/tos/lib/tossim/SimMote.nc">
      <documentation loc="32:/opt/tinyos-2.1.2/tos/lib/tossim/SimMote.nc">
        <short>&#10; TOSSIM-specific interface to access a mote's state.</short>
        <long>&#10; TOSSIM-specific interface to access a mote's state. TinyOS programs&#10; should never use this interface.&#10;&#10; @author Philip Levis&#10; @date   Nov 22 2005&#10;</long>
      </documentation>
      <function command="" provided="0" name="setEuid" ref="0x408888d0" loc="44:/opt/tinyos-2.1.2/tos/lib/tossim/SimMote.nc">
        <interfacedef-ref qname="SimMote"/>
        <type-function size="I:1" alignment="I:1">
          <type-void size="I:1" alignment="I:1"></type-void>
          <function-parameters>
            <type-int cname="long long" size="I:8" alignment="I:8"></type-int>
          </function-parameters>
        </type-function>
        <parameters>
          <variable name="euid" ref="0x40888778" loc="44:/opt/tinyos-2.1.2/tos/lib/tossim/SimMote.nc">
            <type-int cname="long long" size="I:8" alignment="I:8"></type-int>
          </variable>
        </parameters>
      </function>
      <function command="" provided="0" name="getVariableInfo" ref="0x40887a38" loc="47:/opt/tinyos-2.1.2/tos/lib/tossim/SimMote.nc">
        <interfacedef-ref qname="SimMote"/>
        <type-function size="I:1" alignment="I:1">
          <type-int cname="int" size="I:4" alignment="I:4"></type-int>
          <function-parameters>
            <type-pointer size="I:4" alignment="I:4">
              <type-int cname="char" size="I:1" alignment="I:1"></type-int>
            </type-pointer>
            <type-pointer size="I:4" alignment="I:4">
              <type-pointer size="I:4" alignment="I:4">
                <type-void size="I:1" alignment="I:1"></type-void>
              </type-pointer>
            </type-pointer>
            <type-pointer size="I:4" alignment="I:4">
              <type-int cname="unsigned int" unsigned="" size="I:4" alignment="I:4">
                <typename><typedef-ref name="size_t" ref="0x40034498"/></typename>
              </type-int>
            </type-pointer>
          </function-parameters>
        </type-function>
        <parameters>
          <variable name="name" ref="0x40887500" loc="47:/opt/tinyos-2.1.2/tos/lib/tossim/SimMote.nc">
            <type-pointer size="I:4" alignment="I:4">
              <type-int cname="char" size="I:1" alignment="I:1"></type-int>
            </type-pointer>
          </variable>
          <variable name="ptr" ref="0x408876d8" loc="47:/opt/tinyos-2.1.2/tos/lib/tossim/SimMote.nc">
            <type-pointer size="I:4" alignment="I:4">
              <type-pointer size="I:4" alignment="I:4">
                <type-void size="I:1" alignment="I:1"></type-void>
              </type-pointer>
            </type-pointer>
          </variable>
          <variable name="len" ref="0x408878d0" loc="47:/opt/tinyos-2.1.2/tos/lib/tossim/SimMote.nc">
            <type-pointer size="I:4" alignment="I:4">
              <type-int cname="unsigned int" unsigned="" size="I:4" alignment="I:4">
                <typename><typedef-ref name="size_t" ref="0x40034498"/></typename>
              </type-int>
            </type-pointer>
          </variable>
        </parameters>
      </function>
      <function command="" provided="0" name="turnOff" ref="0x408861a8" loc="49:/opt/tinyos-2.1.2/tos/lib/tossim/SimMote.nc">
        <interfacedef-ref qname="SimMote"/>
        <type-function size="I:1" alignment="I:1">
          <type-void size="I:1" alignment="I:1"></type-void>
          <function-parameters>
          </function-parameters>
        </type-function>
        <parameters>
        </parameters>
      </function>
      <function command="" provided="0" name="turnOn" ref="0x40887dc8" loc="48:/opt/tinyos-2.1.2/tos/lib/tossim/SimMote.nc">
        <interfacedef-ref qname="SimMote"/>
        <type-function size="I:1" alignment="I:1">
          <type-void size="I:1" alignment="I:1"></type-void>
          <function-parameters>
          </function-parameters>
        </type-function>
        <parameters>
        </parameters>
      </function>
      <function command="" provided="0" name="getEuid" ref="0x408883a0" loc="43:/opt/tinyos-2.1.2/tos/lib/tossim/SimMote.nc">
        <interfacedef-ref qname="SimMote"/>
        <type-function size="I:1" alignment="I:1">
          <type-int cname="long long" size="I:8" alignment="I:8"></type-int>
          <function-parameters>
          </function-parameters>
        </type-function>
        <parameters>
        </parameters>
      </function>
      <function command="" provided="0" name="isOn" ref="0x408870f8" loc="46:/opt/tinyos-2.1.2/tos/lib/tossim/SimMote.nc">
        <interfacedef-ref qname="SimMote"/>
        <type-function size="I:1" alignment="I:1">
          <type-int cname="unsigned char" unsigned="" size="I:1" alignment="I:1">
            <typename><typedef-ref name="bool" ref="0x40521710"/></typename>
          </type-int>
          <function-parameters>
          </function-parameters>
        </type-function>
        <parameters>
        </parameters>
      </function>
      <function command="" provided="0" name="getStartTime" ref="0x40888d00" loc="45:/opt/tinyos-2.1.2/tos/lib/tossim/SimMote.nc">
        <interfacedef-ref qname="SimMote"/>
        <type-function size="I:1" alignment="I:1">
          <type-int cname="long long" size="I:8" alignment="I:8"></type-int>
          <function-parameters>
          </function-parameters>
        </type-function>
        <parameters>
        </parameters>
      </function>
    </interfacedef>
    <interfacedef qname="Counter" loc="57:/opt/tinyos-2.1.2/tos/lib/timer/Counter.nc">
      <documentation loc="36:/opt/tinyos-2.1.2/tos/lib/timer/Counter.nc">
        <short>&#10; A Counter counts time in some units and in some width, signaling&#10; overflow.</short>
        <long>&#10; A Counter counts time in some units and in some width, signaling&#10; overflow.&#10;&#10; &#60;p>A Counter is parameterised by its &#34;precision&#34; (milliseconds,&#10; microseconds, etc), identified by a type. This prevents, e.g.,&#10; unintentionally mixing components expecting milliseconds with those&#10; expecting microseconds as those interfaces have a different type.&#10;&#10; &#60;p>A Counter's second parameter is its &#34;width&#34;, i.e., the number of&#10; bits used to represent time values. Width is indicated by including&#10; the appropriate size integer type as a Counter parameter.&#10;&#10; &#60;p>See TEP102 for more details.&#10;&#10; @param precision_tag A type indicating the precision of this Counter.&#10; @param size_type An integer type representing time values for this Counter.&#10;&#10; @author Cory Sharp &#60;cssharp@eecs.berkeley.edu>&#10;</long>
      </documentation>
      <parameters>
        <typedef name="precision_tag" ref="0x40a2e418" loc="57:/opt/tinyos-2.1.2/tos/lib/timer/Counter.nc">
          <interfacedef-ref qname="Counter"/>
          <type-var size="U:" alignment="U:"><typedef-ref name="precision_tag" scoped="" ref="0x40a2e418"/></type-var>
        </typedef>
        <typedef name="size_type" ref="0x40a2e580" loc="57:/opt/tinyos-2.1.2/tos/lib/timer/Counter.nc">
          <interfacedef-ref qname="Counter"/>
          <type-var size="U:" alignment="U:"><typedef-ref name="size_type" scoped="" ref="0x40a2e580"/></type-var>
        </typedef>
      </parameters>
      <function command="" provided="0" name="get" ref="0x40a2ea68" loc="64:/opt/tinyos-2.1.2/tos/lib/timer/Counter.nc">
        <documentation loc="59:/opt/tinyos-2.1.2/tos/lib/timer/Counter.nc">
          <short> &#10; Return counter value.</short>
          <long> &#10; Return counter value. Counters start at boot - some time sources may&#10; stop counting while the processor is in low-power mode.&#10; @return Current counter value.&#10;</long>
        </documentation>
        <interfacedef-ref qname="Counter"/>
        <type-function size="I:1" alignment="I:1">
          <type-var size="U:" alignment="U:"><typedef-ref name="size_type" scoped="" ref="0x40a2e580"/></type-var>
          <function-parameters>
          </function-parameters>
        </type-function>
        <parameters>
        </parameters>
      </function>
      <function command="" provided="0" name="clearOverflow" ref="0x40a2c510" loc="76:/opt/tinyos-2.1.2/tos/lib/timer/Counter.nc">
        <documentation loc="73:/opt/tinyos-2.1.2/tos/lib/timer/Counter.nc">
          <short>&#10; Cancel a pending overflow interrupt.</short>
        </documentation>
        <interfacedef-ref qname="Counter"/>
        <type-function size="I:1" alignment="I:1">
          <type-void size="I:1" alignment="I:1"></type-void>
          <function-parameters>
          </function-parameters>
        </type-function>
        <parameters>
        </parameters>
      </function>
      <function command="" provided="0" name="isOverflowPending" ref="0x40a2c010" loc="71:/opt/tinyos-2.1.2/tos/lib/timer/Counter.nc">
        <documentation loc="66:/opt/tinyos-2.1.2/tos/lib/timer/Counter.nc">
          <short> &#10; Return TRUE if an overflow event will occur after the outermost atomic&#10; block is exits.</short>
          <long> &#10; Return TRUE if an overflow event will occur after the outermost atomic&#10; block is exits.  FALSE otherwise.&#10; @return Counter pending overflow status.&#10;</long>
        </documentation>
        <interfacedef-ref qname="Counter"/>
        <type-function size="I:1" alignment="I:1">
          <type-int cname="unsigned char" unsigned="" size="I:1" alignment="I:1">
            <typename><typedef-ref name="bool" ref="0x40521710"/></typename>
          </type-int>
          <function-parameters>
          </function-parameters>
        </type-function>
        <parameters>
        </parameters>
      </function>
      <function event="" provided="0" name="overflow" ref="0x40a2c910" loc="82:/opt/tinyos-2.1.2/tos/lib/timer/Counter.nc">
        <documentation loc="78:/opt/tinyos-2.1.2/tos/lib/timer/Counter.nc">
          <short>&#10; Signals that the current time has overflowed.</short>
          <long>&#10; Signals that the current time has overflowed.  That is, the current&#10; time has wrapped around from its maximum value to zero.&#10;</long>
        </documentation>
        <interfacedef-ref qname="Counter"/>
        <type-function size="I:1" alignment="I:1">
          <type-void size="I:1" alignment="I:1"></type-void>
          <function-parameters>
          </function-parameters>
        </type-function>
        <parameters>
        </parameters>
      </function>
    </interfacedef>
    <interfacedef qname="GeneralIO" loc="38:/opt/tinyos-2.1.2/tos/interfaces/GeneralIO.nc">
      <documentation loc="34:/opt/tinyos-2.1.2/tos/interfaces/GeneralIO.nc">
        <short>&#10; </short>
        <long>&#10; @author Joe Polastre&#10;</long>
      </documentation>
      <function command="" provided="0" name="makeInput" ref="0x407a8bb0" loc="44:/opt/tinyos-2.1.2/tos/interfaces/GeneralIO.nc">
        <interfacedef-ref qname="GeneralIO"/>
        <type-function size="I:1" alignment="I:1">
          <type-void size="I:1" alignment="I:1"></type-void>
          <function-parameters>
          </function-parameters>
        </type-function>
        <parameters>
        </parameters>
      </function>
      <function command="" provided="0" name="isInput" ref="0x407a7010" loc="45:/opt/tinyos-2.1.2/tos/interfaces/GeneralIO.nc">
        <interfacedef-ref qname="GeneralIO"/>
        <type-function size="I:1" alignment="I:1">
          <type-int cname="unsigned char" unsigned="" size="I:1" alignment="I:1">
            <typename><typedef-ref name="bool" ref="0x40521710"/></typename>
          </type-int>
          <function-parameters>
          </function-parameters>
        </type-function>
        <parameters>
        </parameters>
      </function>
      <function command="" provided="0" name="toggle" ref="0x407a8420" loc="42:/opt/tinyos-2.1.2/tos/interfaces/GeneralIO.nc">
        <interfacedef-ref qname="GeneralIO"/>
        <type-function size="I:1" alignment="I:1">
          <type-void size="I:1" alignment="I:1"></type-void>
          <function-parameters>
          </function-parameters>
        </type-function>
        <parameters>
        </parameters>
      </function>
      <function command="" provided="0" name="isOutput" ref="0x407a77e0" loc="47:/opt/tinyos-2.1.2/tos/interfaces/GeneralIO.nc">
        <interfacedef-ref qname="GeneralIO"/>
        <type-function size="I:1" alignment="I:1">
          <type-int cname="unsigned char" unsigned="" size="I:1" alignment="I:1">
            <typename><typedef-ref name="bool" ref="0x40521710"/></typename>
          </type-int>
          <function-parameters>
          </function-parameters>
        </type-function>
        <parameters>
        </parameters>
      </function>
      <function command="" provided="0" name="get" ref="0x407a87e0" loc="43:/opt/tinyos-2.1.2/tos/interfaces/GeneralIO.nc">
        <interfacedef-ref qname="GeneralIO"/>
        <type-function size="I:1" alignment="I:1">
          <type-int cname="unsigned char" unsigned="" size="I:1" alignment="I:1">
            <typename><typedef-ref name="bool" ref="0x40521710"/></typename>
          </type-int>
          <function-parameters>
          </function-parameters>
        </type-function>
        <parameters>
        </parameters>
      </function>
      <function command="" provided="0" name="makeOutput" ref="0x407a73e8" loc="46:/opt/tinyos-2.1.2/tos/interfaces/GeneralIO.nc">
        <interfacedef-ref qname="GeneralIO"/>
        <type-function size="I:1" alignment="I:1">
          <type-void size="I:1" alignment="I:1"></type-void>
          <function-parameters>
          </function-parameters>
        </type-function>
        <parameters>
        </parameters>
      </function>
      <function command="" provided="0" name="set" ref="0x407abcc0" loc="40:/opt/tinyos-2.1.2/tos/interfaces/GeneralIO.nc">
        <interfacedef-ref qname="GeneralIO"/>
        <type-function size="I:1" alignment="I:1">
          <type-void size="I:1" alignment="I:1"></type-void>
          <function-parameters>
          </function-parameters>
        </type-function>
        <parameters>
        </parameters>
      </function>
      <function command="" provided="0" name="clr" ref="0x407a8070" loc="41:/opt/tinyos-2.1.2/tos/interfaces/GeneralIO.nc">
        <interfacedef-ref qname="GeneralIO"/>
        <type-function size="I:1" alignment="I:1">
          <type-void size="I:1" alignment="I:1"></type-void>
          <function-parameters>
          </function-parameters>
        </type-function>
        <parameters>
        </parameters>
      </function>
    </interfacedef>
    <interfacedef qname="Leds" loc="51:/opt/tinyos-2.1.2/tos/interfaces/Leds.nc">
      <documentation loc="33:/opt/tinyos-2.1.2/tos/types/Leds.h">
        <short>&#10; Constants for manipulating LEDs.</short>
        <long>&#10; Constants for manipulating LEDs.&#10;&#10; @author Philip Levis&#10; @date   March 21, 2005&#10;</long>
      </documentation>
      <function command="" provided="0" name="led0Off" ref="0x409d6010" loc="61:/opt/tinyos-2.1.2/tos/interfaces/Leds.nc">
        <documentation loc="58:/opt/tinyos-2.1.2/tos/interfaces/Leds.nc">
          <short>&#10; Turn off LED 0.</short>
          <long>&#10; Turn off LED 0. The color of this LED depends on the platform.&#10;</long>
        </documentation>
        <interfacedef-ref qname="Leds"/>
        <type-function size="I:1" alignment="I:1">
          <type-void size="I:1" alignment="I:1"></type-void>
          <function-parameters>
          </function-parameters>
        </type-function>
        <parameters>
        </parameters>
      </function>
      <function command="" provided="0" name="led0Toggle" ref="0x409d6458" loc="67:/opt/tinyos-2.1.2/tos/interfaces/Leds.nc">
        <documentation loc="63:/opt/tinyos-2.1.2/tos/interfaces/Leds.nc">
          <short>&#10; Toggle LED 0; if it was off, turn it on, if was on, turn it off.</short>
          <long>&#10; Toggle LED 0; if it was off, turn it on, if was on, turn it off.&#10; The color of this LED depends on the platform.&#10;</long>
        </documentation>
        <interfacedef-ref qname="Leds"/>
        <type-function size="I:1" alignment="I:1">
          <type-void size="I:1" alignment="I:1"></type-void>
          <function-parameters>
          </function-parameters>
        </type-function>
        <parameters>
        </parameters>
      </function>
      <function command="" provided="0" name="led1On" ref="0x409d68d8" loc="72:/opt/tinyos-2.1.2/tos/interfaces/Leds.nc">
        <documentation loc="69:/opt/tinyos-2.1.2/tos/interfaces/Leds.nc">
          <short>&#10; Turn on LED 1.</short>
          <long>&#10; Turn on LED 1. The color of this LED depends on the platform.&#10;</long>
        </documentation>
        <interfacedef-ref qname="Leds"/>
        <type-function size="I:1" alignment="I:1">
          <type-void size="I:1" alignment="I:1"></type-void>
          <function-parameters>
          </function-parameters>
        </type-function>
        <parameters>
        </parameters>
      </function>
      <function command="" provided="0" name="led1Toggle" ref="0x409d5158" loc="83:/opt/tinyos-2.1.2/tos/interfaces/Leds.nc">
        <documentation loc="79:/opt/tinyos-2.1.2/tos/interfaces/Leds.nc">
          <short>&#10; Toggle LED 1; if it was off, turn it on, if was on, turn it off.</short>
          <long>&#10; Toggle LED 1; if it was off, turn it on, if was on, turn it off.&#10; The color of this LED depends on the platform.&#10;</long>
        </documentation>
        <interfacedef-ref qname="Leds"/>
        <type-function size="I:1" alignment="I:1">
          <type-void size="I:1" alignment="I:1"></type-void>
          <function-parameters>
          </function-parameters>
        </type-function>
        <parameters>
        </parameters>
      </function>
      <function command="" provided="0" name="led2Toggle" ref="0x409d5e48" loc="100:/opt/tinyos-2.1.2/tos/interfaces/Leds.nc">
        <documentation loc="96:/opt/tinyos-2.1.2/tos/interfaces/Leds.nc">
          <short>&#10; Toggle LED 2; if it was off, turn it on, if was on, turn it off.</short>
          <long>&#10; Toggle LED 2; if it was off, turn it on, if was on, turn it off.&#10; The color of this LED depends on the platform.&#10;</long>
        </documentation>
        <interfacedef-ref qname="Leds"/>
        <type-function size="I:1" alignment="I:1">
          <type-void size="I:1" alignment="I:1"></type-void>
          <function-parameters>
          </function-parameters>
        </type-function>
        <parameters>
        </parameters>
      </function>
      <function command="" provided="0" name="get" ref="0x409f4318" loc="117:/opt/tinyos-2.1.2/tos/interfaces/Leds.nc">
        <documentation loc="103:/opt/tinyos-2.1.2/tos/interfaces/Leds.nc">
          <short>&#10; Get the current LED settings as a bitmask.</short>
          <long>&#10; Get the current LED settings as a bitmask. Each bit corresponds to&#10; whether an LED is on; bit 0 is LED 0, bit 1 is LED 1, etc. You can&#10; also use the enums LEDS_LED0, LEDS_LED1. For example, this expression&#10; will determine whether LED 2 is on:&#10;&#10; &#60;pre> (call Leds.get() &#38; LEDS_LED2) &#60;/pre>&#10;&#10; This command supports up to 8 LEDs; if a platform has fewer, then&#10; those LEDs should always be off (their bit is zero). Also see&#10; &#60;tt>set()&#60;/tt>.&#10;&#10; @return a bitmask describing which LEDs are on and which are off&#10;</long>
        </documentation>
        <interfacedef-ref qname="Leds"/>
        <type-function size="I:1" alignment="I:1">
          <type-int cname="unsigned char" unsigned="" size="I:1" alignment="I:1">
            <typename><typedef-ref name="uint8_t" ref="0x40218250"/></typename>
          </type-int>
          <function-parameters>
          </function-parameters>
        </type-function>
        <parameters>
        </parameters>
      </function>
      <function command="" provided="0" name="led1Off" ref="0x409d6d00" loc="77:/opt/tinyos-2.1.2/tos/interfaces/Leds.nc">
        <documentation loc="74:/opt/tinyos-2.1.2/tos/interfaces/Leds.nc">
          <short>&#10; Turn off LED 1.</short>
          <long>&#10; Turn off LED 1. The color of this LED depends on the platform.&#10;</long>
        </documentation>
        <interfacedef-ref qname="Leds"/>
        <type-function size="I:1" alignment="I:1">
          <type-void size="I:1" alignment="I:1"></type-void>
          <function-parameters>
          </function-parameters>
        </type-function>
        <parameters>
        </parameters>
      </function>
      <function command="" provided="0" name="set" ref="0x409f4a58" loc="134:/opt/tinyos-2.1.2/tos/interfaces/Leds.nc">
        <documentation loc="120:/opt/tinyos-2.1.2/tos/interfaces/Leds.nc">
          <short>&#10; Set the current LED configuration using a bitmask.</short>
          <long>&#10; Set the current LED configuration using a bitmask.  Each bit&#10; corresponds to whether an LED is on; bit 0 is LED 0, bit 1 is LED&#10; 1, etc. You can also use the enums LEDS_LED0, LEDS_LED1. For example,&#10; this statement will configure the LEDs so LED 0 and LED 2 are on:&#10;&#10; &#60;pre> call Leds.set(LEDS_LED0 | LEDS_LED2); &#60;/pre>&#10;&#10; This statement will turn LED 1 on if it was not already:&#10;&#10; &#60;pre>call Leds.set(call Leds.get() | LEDS_LED1);&#60;/pre>&#10;&#10; @param  val   a bitmask describing the on/off settings of the LEDs&#10;</long>
        </documentation>
        <interfacedef-ref qname="Leds"/>
        <type-function size="I:1" alignment="I:1">
          <type-void size="I:1" alignment="I:1"></type-void>
          <function-parameters>
            <type-int cname="unsigned char" unsigned="" size="I:1" alignment="I:1">
              <typename><typedef-ref name="uint8_t" ref="0x40218250"/></typename>
            </type-int>
          </function-parameters>
        </type-function>
        <parameters>
          <variable name="val" ref="0x409f4900" loc="134:/opt/tinyos-2.1.2/tos/interfaces/Leds.nc">
            <type-int cname="unsigned char" unsigned="" size="I:1" alignment="I:1">
              <typename><typedef-ref name="uint8_t" ref="0x40218250"/></typename>
            </type-int>
          </variable>
        </parameters>
      </function>
      <function command="" provided="0" name="led0On" ref="0x409d9b78" loc="56:/opt/tinyos-2.1.2/tos/interfaces/Leds.nc">
        <documentation loc="53:/opt/tinyos-2.1.2/tos/interfaces/Leds.nc">
          <short>&#10; Turn on LED 0.</short>
          <long>&#10; Turn on LED 0. The color of this LED depends on the platform.&#10;</long>
        </documentation>
        <interfacedef-ref qname="Leds"/>
        <type-function size="I:1" alignment="I:1">
          <type-void size="I:1" alignment="I:1"></type-void>
          <function-parameters>
          </function-parameters>
        </type-function>
        <parameters>
        </parameters>
      </function>
      <function command="" provided="0" name="led2On" ref="0x409d55d8" loc="89:/opt/tinyos-2.1.2/tos/interfaces/Leds.nc">
        <documentation loc="86:/opt/tinyos-2.1.2/tos/interfaces/Leds.nc">
          <short>&#10; Turn on LED 2.</short>
          <long>&#10; Turn on LED 2. The color of this LED depends on the platform.&#10;</long>
        </documentation>
        <interfacedef-ref qname="Leds"/>
        <type-function size="I:1" alignment="I:1">
          <type-void size="I:1" alignment="I:1"></type-void>
          <function-parameters>
          </function-parameters>
        </type-function>
        <parameters>
        </parameters>
      </function>
      <function command="" provided="0" name="led2Off" ref="0x409d5a00" loc="94:/opt/tinyos-2.1.2/tos/interfaces/Leds.nc">
        <documentation loc="91:/opt/tinyos-2.1.2/tos/interfaces/Leds.nc">
          <short>&#10; Turn off LED 2.</short>
          <long>&#10; Turn off LED 2. The color of this LED depends on the platform.&#10;</long>
        </documentation>
        <interfacedef-ref qname="Leds"/>
        <type-function size="I:1" alignment="I:1">
          <type-void size="I:1" alignment="I:1"></type-void>
          <function-parameters>
          </function-parameters>
        </type-function>
        <parameters>
        </parameters>
      </function>
    </interfacedef>
    <interfacedef qname="PacketAcknowledgements" loc="44:/opt/tinyos-2.1.2/tos/interfaces/PacketAcknowledgements.nc">
      <documentation loc="34:/opt/tinyos-2.1.2/tos/interfaces/PacketAcknowledgements.nc">
        <short>&#10; This interface allows a component to enable or disable acknowledgments&#10; on a per-packet basis.</short>
        <long>&#10; This interface allows a component to enable or disable acknowledgments&#10; on a per-packet basis.&#10;&#10; @author Jonathan Hui&#10; @author Philip Levis&#10; @author Joe Polastre&#10; @date   June 21 2006&#10;</long>
      </documentation>
      <function command="" provided="0" name="requestAck" ref="0x408cc710" loc="59:/opt/tinyos-2.1.2/tos/interfaces/PacketAcknowledgements.nc">
        <documentation loc="46:/opt/tinyos-2.1.2/tos/interfaces/PacketAcknowledgements.nc">
          <short>&#10; Tell a protocol that when it sends this packet, it should use synchronous&#10; acknowledgments.</short>
          <long>&#10; Tell a protocol that when it sends this packet, it should use synchronous&#10; acknowledgments.&#10; The acknowledgment is synchronous as the caller can check whether the&#10; ack was received through the wasAcked() command as soon as a send operation&#10; completes.&#10;&#10; @param 'message_t* ONE msg' - A message which should be acknowledged when transmitted.&#10; @return SUCCESS if acknowledgements are enabled, EBUSY&#10; if the communication layer cannot enable them at this time, FAIL&#10; if it does not support them.&#10;</long>
        </documentation>
        <interfacedef-ref qname="PacketAcknowledgements"/>
        <type-function size="I:1" alignment="I:1">
          <type-int cname="unsigned char" unsigned="" size="I:1" alignment="I:1">
            <typename><typedef-ref name="error_t" ref="0x405c8e98"/></typename>
          </type-int>
          <function-parameters>
            <type-pointer size="I:4" alignment="I:4">
              <type-tag size="I:41" alignment="I:1"><nx_struct-ref name="message_t" ref="0x406f2838"/>
                <typename><typedef-ref name="message_t" ref="0x406f1600"/></typename>
              </type-tag>
            </type-pointer>
          </function-parameters>
        </type-function>
        <parameters>
          <variable name="msg" ref="0x408cc5b8" loc="59:/opt/tinyos-2.1.2/tos/interfaces/PacketAcknowledgements.nc">
            <type-pointer size="I:4" alignment="I:4">
              <type-tag size="I:41" alignment="I:1"><nx_struct-ref name="message_t" ref="0x406f2838"/>
                <typename><typedef-ref name="message_t" ref="0x406f1600"/></typename>
              </type-tag>
            </type-pointer>
          </variable>
        </parameters>
      </function>
      <function command="" provided="0" name="noAck" ref="0x408ca220" loc="71:/opt/tinyos-2.1.2/tos/interfaces/PacketAcknowledgements.nc">
        <documentation loc="61:/opt/tinyos-2.1.2/tos/interfaces/PacketAcknowledgements.nc">
          <short>&#10; Tell a protocol that when it sends this packet, it should not use&#10; synchronous acknowledgments.</short>
          <long>&#10; Tell a protocol that when it sends this packet, it should not use&#10; synchronous acknowledgments.&#10;&#10; @param 'message_t* ONE msg' - A message which should not be acknowledged when transmitted.&#10; @return SUCCESS if acknowledgements are disabled, EBUSY&#10; if the communication layer cannot disable them at this time, FAIL&#10; if it cannot support unacknowledged communication.&#10;</long>
        </documentation>
        <interfacedef-ref qname="PacketAcknowledgements"/>
        <type-function size="I:1" alignment="I:1">
          <type-int cname="unsigned char" unsigned="" size="I:1" alignment="I:1">
            <typename><typedef-ref name="error_t" ref="0x405c8e98"/></typename>
          </type-int>
          <function-parameters>
            <type-pointer size="I:4" alignment="I:4">
              <type-tag size="I:41" alignment="I:1"><nx_struct-ref name="message_t" ref="0x406f2838"/>
                <typename><typedef-ref name="message_t" ref="0x406f1600"/></typename>
              </type-tag>
            </type-pointer>
          </function-parameters>
        </type-function>
        <parameters>
          <variable name="msg" ref="0x408ca0c8" loc="71:/opt/tinyos-2.1.2/tos/interfaces/PacketAcknowledgements.nc">
            <type-pointer size="I:4" alignment="I:4">
              <type-tag size="I:41" alignment="I:1"><nx_struct-ref name="message_t" ref="0x406f2838"/>
                <typename><typedef-ref name="message_t" ref="0x406f1600"/></typename>
              </type-tag>
            </type-pointer>
          </variable>
        </parameters>
      </function>
      <function command="" provided="0" name="wasAcked" ref="0x408caca8" loc="85:/opt/tinyos-2.1.2/tos/interfaces/PacketAcknowledgements.nc">
        <documentation loc="73:/opt/tinyos-2.1.2/tos/interfaces/PacketAcknowledgements.nc">
          <short>&#10; Tell a caller whether or not a transmitted packet was acknowledged.</short>
          <long>&#10; Tell a caller whether or not a transmitted packet was acknowledged.&#10; If acknowledgments on the packet had been disabled through noAck(),&#10; then the return value is undefined. If a packet&#10; layer does not support acknowledgements, this command must return always&#10; return FALSE.&#10;&#10; @param 'message_t* ONE msg' - A transmitted message.&#10; @return Whether the packet was acknowledged.&#10;&#10;</long>
        </documentation>
        <interfacedef-ref qname="PacketAcknowledgements"/>
        <type-function size="I:1" alignment="I:1">
          <type-int cname="unsigned char" unsigned="" size="I:1" alignment="I:1">
            <typename><typedef-ref name="bool" ref="0x40521710"/></typename>
          </type-int>
          <function-parameters>
            <type-pointer size="I:4" alignment="I:4">
              <type-tag size="I:41" alignment="I:1"><nx_struct-ref name="message_t" ref="0x406f2838"/>
                <typename><typedef-ref name="message_t" ref="0x406f1600"/></typename>
              </type-tag>
            </type-pointer>
          </function-parameters>
        </type-function>
        <parameters>
          <variable name="msg" ref="0x408cab50" loc="85:/opt/tinyos-2.1.2/tos/interfaces/PacketAcknowledgements.nc">
            <type-pointer size="I:4" alignment="I:4">
              <type-tag size="I:41" alignment="I:1"><nx_struct-ref name="message_t" ref="0x406f2838"/>
                <typename><typedef-ref name="message_t" ref="0x406f1600"/></typename>
              </type-tag>
            </type-pointer>
          </variable>
        </parameters>
      </function>
    </interfacedef>
    <interfacedef qname="GainRadioModel" loc="47:/opt/tinyos-2.1.2/tos/lib/tossim/GainRadioModel.nc">
      <documentation loc="34:/opt/tinyos-2.1.2/tos/types/TinyError.h">
        <short>&#10; </short>
        <long>&#10; @author Phil Levis&#10; @author David Gay&#10; Revision:  $Revision: 1.12 $&#10;&#10; Defines global error codes for error_t in TinyOS.&#10;</long>
      </documentation>
      <function command="" provided="0" name="putOnAirTo" ref="0x40929430" loc="48:/opt/tinyos-2.1.2/tos/lib/tossim/GainRadioModel.nc">
        <interfacedef-ref qname="GainRadioModel"/>
        <type-function size="I:1" alignment="I:1">
          <type-void size="I:1" alignment="I:1"></type-void>
          <function-parameters>
            <type-int cname="int" size="I:4" alignment="I:4"></type-int>
            <type-pointer size="I:4" alignment="I:4">
              <type-tag size="I:41" alignment="I:1"><nx_struct-ref name="message_t" ref="0x406f2838"/>
                <typename><typedef-ref name="message_t" ref="0x406f1600"/></typename>
              </type-tag>
            </type-pointer>
            <type-int cname="unsigned char" unsigned="" size="I:1" alignment="I:1">
              <typename><typedef-ref name="bool" ref="0x40521710"/></typename>
            </type-int>
            <type-int cname="long long" size="I:8" alignment="I:8">
              <typename><typedef-ref name="sim_time_t" ref="0x40520110"/></typename>
            </type-int>
            <type-float cname="double" size="I:8" alignment="I:8"></type-float>
            <type-float cname="double" size="I:8" alignment="I:8"></type-float>
          </function-parameters>
        </type-function>
        <parameters>
          <variable name="dest" ref="0x4090e890" loc="48:/opt/tinyos-2.1.2/tos/lib/tossim/GainRadioModel.nc">
            <type-int cname="int" size="I:4" alignment="I:4"></type-int>
          </variable>
          <variable name="msg" ref="0x4090eab8" loc="49:/opt/tinyos-2.1.2/tos/lib/tossim/GainRadioModel.nc">
            <type-pointer size="I:4" alignment="I:4">
              <type-tag size="I:41" alignment="I:1"><nx_struct-ref name="message_t" ref="0x406f2838"/>
                <typename><typedef-ref name="message_t" ref="0x406f1600"/></typename>
              </type-tag>
            </type-pointer>
          </variable>
          <variable name="ack" ref="0x4090ec90" loc="50:/opt/tinyos-2.1.2/tos/lib/tossim/GainRadioModel.nc">
            <type-int cname="unsigned char" unsigned="" size="I:1" alignment="I:1">
              <typename><typedef-ref name="bool" ref="0x40521710"/></typename>
            </type-int>
          </variable>
          <variable name="endTime" ref="0x4090eec8" loc="51:/opt/tinyos-2.1.2/tos/lib/tossim/GainRadioModel.nc">
            <type-int cname="long long" size="I:8" alignment="I:8">
              <typename><typedef-ref name="sim_time_t" ref="0x40520110"/></typename>
            </type-int>
          </variable>
          <variable name="gain" ref="0x409290b8" loc="52:/opt/tinyos-2.1.2/tos/lib/tossim/GainRadioModel.nc">
            <type-float cname="double" size="I:8" alignment="I:8"></type-float>
          </variable>
          <variable name="reverseGain" ref="0x409292b0" loc="53:/opt/tinyos-2.1.2/tos/lib/tossim/GainRadioModel.nc">
            <type-float cname="double" size="I:8" alignment="I:8"></type-float>
          </variable>
        </parameters>
      </function>
      <function event="" provided="0" name="receive" ref="0x40927c18" loc="60:/opt/tinyos-2.1.2/tos/lib/tossim/GainRadioModel.nc">
        <interfacedef-ref qname="GainRadioModel"/>
        <type-function size="I:1" alignment="I:1">
          <type-void size="I:1" alignment="I:1"></type-void>
          <function-parameters>
            <type-pointer size="I:4" alignment="I:4">
              <type-tag size="I:41" alignment="I:1"><nx_struct-ref name="message_t" ref="0x406f2838"/>
                <typename><typedef-ref name="message_t" ref="0x406f1600"/></typename>
              </type-tag>
            </type-pointer>
          </function-parameters>
        </type-function>
        <parameters>
          <variable name="msg" ref="0x40927ac0" loc="60:/opt/tinyos-2.1.2/tos/lib/tossim/GainRadioModel.nc">
            <type-pointer size="I:4" alignment="I:4">
              <type-tag size="I:41" alignment="I:1"><nx_struct-ref name="message_t" ref="0x406f2838"/>
                <typename><typedef-ref name="message_t" ref="0x406f1600"/></typename>
              </type-tag>
            </type-pointer>
          </variable>
        </parameters>
      </function>
      <function command="" provided="0" name="clearChannel" ref="0x40929d48" loc="56:/opt/tinyos-2.1.2/tos/lib/tossim/GainRadioModel.nc">
        <interfacedef-ref qname="GainRadioModel"/>
        <type-function size="I:1" alignment="I:1">
          <type-int cname="unsigned char" unsigned="" size="I:1" alignment="I:1">
            <typename><typedef-ref name="bool" ref="0x40521710"/></typename>
          </type-int>
          <function-parameters>
          </function-parameters>
        </type-function>
        <parameters>
        </parameters>
      </function>
      <function command="" provided="0" name="setPendingTransmission" ref="0x409271a8" loc="57:/opt/tinyos-2.1.2/tos/lib/tossim/GainRadioModel.nc">
        <interfacedef-ref qname="GainRadioModel"/>
        <type-function size="I:1" alignment="I:1">
          <type-void size="I:1" alignment="I:1"></type-void>
          <function-parameters>
          </function-parameters>
        </type-function>
        <parameters>
        </parameters>
      </function>
      <function command="" provided="0" name="setClearValue" ref="0x40929948" loc="55:/opt/tinyos-2.1.2/tos/lib/tossim/GainRadioModel.nc">
        <interfacedef-ref qname="GainRadioModel"/>
        <type-function size="I:1" alignment="I:1">
          <type-void size="I:1" alignment="I:1"></type-void>
          <function-parameters>
            <type-float cname="double" size="I:8" alignment="I:8"></type-float>
          </function-parameters>
        </type-function>
        <parameters>
          <variable name="value" ref="0x409297f0" loc="55:/opt/tinyos-2.1.2/tos/lib/tossim/GainRadioModel.nc">
            <type-float cname="double" size="I:8" alignment="I:8"></type-float>
          </variable>
        </parameters>
      </function>
      <function event="" provided="0" name="acked" ref="0x409276d8" loc="59:/opt/tinyos-2.1.2/tos/lib/tossim/GainRadioModel.nc">
        <interfacedef-ref qname="GainRadioModel"/>
        <type-function size="I:1" alignment="I:1">
          <type-void size="I:1" alignment="I:1"></type-void>
          <function-parameters>
            <type-pointer size="I:4" alignment="I:4">
              <type-tag size="I:41" alignment="I:1"><nx_struct-ref name="message_t" ref="0x406f2838"/>
                <typename><typedef-ref name="message_t" ref="0x406f1600"/></typename>
              </type-tag>
            </type-pointer>
          </function-parameters>
        </type-function>
        <parameters>
          <variable name="msg" ref="0x40927580" loc="59:/opt/tinyos-2.1.2/tos/lib/tossim/GainRadioModel.nc">
            <type-pointer size="I:4" alignment="I:4">
              <type-tag size="I:41" alignment="I:1"><nx_struct-ref name="message_t" ref="0x406f2838"/>
                <typename><typedef-ref name="message_t" ref="0x406f1600"/></typename>
              </type-tag>
            </type-pointer>
          </variable>
        </parameters>
      </function>
      <function event="" provided="0" name="shouldAck" ref="0x409261c0" loc="61:/opt/tinyos-2.1.2/tos/lib/tossim/GainRadioModel.nc">
        <interfacedef-ref qname="GainRadioModel"/>
        <type-function size="I:1" alignment="I:1">
          <type-int cname="unsigned char" unsigned="" size="I:1" alignment="I:1">
            <typename><typedef-ref name="bool" ref="0x40521710"/></typename>
          </type-int>
          <function-parameters>
            <type-pointer size="I:4" alignment="I:4">
              <type-tag size="I:41" alignment="I:1"><nx_struct-ref name="message_t" ref="0x406f2838"/>
                <typename><typedef-ref name="message_t" ref="0x406f1600"/></typename>
              </type-tag>
            </type-pointer>
          </function-parameters>
        </type-function>
        <parameters>
          <variable name="msg" ref="0x40926068" loc="61:/opt/tinyos-2.1.2/tos/lib/tossim/GainRadioModel.nc">
            <type-pointer size="I:4" alignment="I:4">
              <type-tag size="I:41" alignment="I:1"><nx_struct-ref name="message_t" ref="0x406f2838"/>
                <typename><typedef-ref name="message_t" ref="0x406f1600"/></typename>
              </type-tag>
            </type-pointer>
          </variable>
        </parameters>
      </function>
    </interfacedef>
    <interfacedef qname="TossimPacketModel" loc="45:/opt/tinyos-2.1.2/tos/lib/tossim/TossimPacketModel.nc">
      <documentation loc="34:/opt/tinyos-2.1.2/tos/types/TinyError.h">
        <short>&#10; </short>
        <long>&#10; @author Phil Levis&#10; @author David Gay&#10; Revision:  $Revision: 1.12 $&#10;&#10; Defines global error codes for error_t in TinyOS.&#10;</long>
      </documentation>
      <function command="" provided="0" name="send" ref="0x408dd230" loc="57:/opt/tinyos-2.1.2/tos/lib/tossim/TossimPacketModel.nc">
        <documentation loc="47:/opt/tinyos-2.1.2/tos/lib/tossim/TossimPacketModel.nc">
          <short> &#10; Send a packet with a data payload of &#60;tt>len&#60;/tt>.</short>
          <long> &#10; Send a packet with a data payload of &#60;tt>len&#60;/tt>. To determine&#10; the maximum available size, use the Packet interface of the&#10; component providing Send. If send returns SUCCESS, then the&#10; component will signal the sendDone event in the future; if send&#10; returns an error, it will not signal sendDone.  Note that a&#10; component may accept a send request which it later finds it&#10; cannot satisfy; in this case, it will signal sendDone with an&#10; appropriate error code.&#10;</long>
        </documentation>
        <interfacedef-ref qname="TossimPacketModel"/>
        <type-function size="I:1" alignment="I:1">
          <type-int cname="unsigned char" unsigned="" size="I:1" alignment="I:1">
            <typename><typedef-ref name="error_t" ref="0x405c8e98"/></typename>
          </type-int>
          <function-parameters>
            <type-int cname="int" size="I:4" alignment="I:4"></type-int>
            <type-pointer size="I:4" alignment="I:4">
              <type-tag size="I:41" alignment="I:1"><nx_struct-ref name="message_t" ref="0x406f2838"/>
                <typename><typedef-ref name="message_t" ref="0x406f1600"/></typename>
              </type-tag>
            </type-pointer>
            <type-int cname="unsigned char" unsigned="" size="I:1" alignment="I:1">
              <typename><typedef-ref name="uint8_t" ref="0x40218250"/></typename>
            </type-int>
          </function-parameters>
        </type-function>
        <parameters>
          <variable name="node" ref="0x408decb8" loc="57:/opt/tinyos-2.1.2/tos/lib/tossim/TossimPacketModel.nc">
            <type-int cname="int" size="I:4" alignment="I:4"></type-int>
          </variable>
          <variable name="msg" ref="0x408deed0" loc="57:/opt/tinyos-2.1.2/tos/lib/tossim/TossimPacketModel.nc">
            <type-pointer size="I:4" alignment="I:4">
              <type-tag size="I:41" alignment="I:1"><nx_struct-ref name="message_t" ref="0x406f2838"/>
                <typename><typedef-ref name="message_t" ref="0x406f1600"/></typename>
              </type-tag>
            </type-pointer>
          </variable>
          <variable name="len" ref="0x408dd0c8" loc="57:/opt/tinyos-2.1.2/tos/lib/tossim/TossimPacketModel.nc">
            <type-int cname="unsigned char" unsigned="" size="I:1" alignment="I:1">
              <typename><typedef-ref name="uint8_t" ref="0x40218250"/></typename>
            </type-int>
          </variable>
        </parameters>
      </function>
      <function event="" provided="0" name="receive" ref="0x408dc9b0" loc="85:/opt/tinyos-2.1.2/tos/lib/tossim/TossimPacketModel.nc">
        <documentation loc="79:/opt/tinyos-2.1.2/tos/lib/tossim/TossimPacketModel.nc">
          <short>&#10; Signal that a packet was received.</short>
          <long>&#10; Signal that a packet was received. Note that there is no buffer&#10; swap: a component using this interface must copy out the message&#10; if it needs it.&#10;</long>
        </documentation>
        <interfacedef-ref qname="TossimPacketModel"/>
        <type-function size="I:1" alignment="I:1">
          <type-void size="I:1" alignment="I:1"></type-void>
          <function-parameters>
            <type-pointer size="I:4" alignment="I:4">
              <type-tag size="I:41" alignment="I:1"><nx_struct-ref name="message_t" ref="0x406f2838"/>
                <typename><typedef-ref name="message_t" ref="0x406f1600"/></typename>
              </type-tag>
            </type-pointer>
          </function-parameters>
        </type-function>
        <parameters>
          <variable name="msg" ref="0x408dc858" loc="85:/opt/tinyos-2.1.2/tos/lib/tossim/TossimPacketModel.nc">
            <type-pointer size="I:4" alignment="I:4">
              <type-tag size="I:41" alignment="I:1"><nx_struct-ref name="message_t" ref="0x406f2838"/>
                <typename><typedef-ref name="message_t" ref="0x406f1600"/></typename>
              </type-tag>
            </type-pointer>
          </variable>
        </parameters>
      </function>
      <function command="" provided="0" name="cancel" ref="0x408dd9d0" loc="69:/opt/tinyos-2.1.2/tos/lib/tossim/TossimPacketModel.nc">
        <documentation loc="59:/opt/tinyos-2.1.2/tos/lib/tossim/TossimPacketModel.nc">
          <short>&#10; Cancel a requested transmission.</short>
          <long>&#10; Cancel a requested transmission. Returns SUCCESS if the &#10; transmission was cancelled properly (not sent in its&#10; entirety). Note that the component may not know&#10; if the send was successfully cancelled, if the radio is&#10; handling much of the logic; in this case, a component&#10; should be conservative and return an appropriate error code.&#10; A successful call to cancel must always result in a &#10; sendFailed event, and never a sendSucceeded event.&#10;</long>
        </documentation>
        <interfacedef-ref qname="TossimPacketModel"/>
        <type-function size="I:1" alignment="I:1">
          <type-int cname="unsigned char" unsigned="" size="I:1" alignment="I:1">
            <typename><typedef-ref name="error_t" ref="0x405c8e98"/></typename>
          </type-int>
          <function-parameters>
            <type-pointer size="I:4" alignment="I:4">
              <type-tag size="I:41" alignment="I:1"><nx_struct-ref name="message_t" ref="0x406f2838"/>
                <typename><typedef-ref name="message_t" ref="0x406f1600"/></typename>
              </type-tag>
            </type-pointer>
          </function-parameters>
        </type-function>
        <parameters>
          <variable name="msg" ref="0x408dd878" loc="69:/opt/tinyos-2.1.2/tos/lib/tossim/TossimPacketModel.nc">
            <type-pointer size="I:4" alignment="I:4">
              <type-tag size="I:41" alignment="I:1"><nx_struct-ref name="message_t" ref="0x406f2838"/>
                <typename><typedef-ref name="message_t" ref="0x406f1600"/></typename>
              </type-tag>
            </type-pointer>
          </variable>
        </parameters>
      </function>
      <function event="" provided="0" name="sendDone" ref="0x408dc368" loc="76:/opt/tinyos-2.1.2/tos/lib/tossim/TossimPacketModel.nc">
        <documentation loc="71:/opt/tinyos-2.1.2/tos/lib/tossim/TossimPacketModel.nc">
          <short> &#10; Signaled in response to an accepted send request.</short>
          <long> &#10; Signaled in response to an accepted send request. &#60;tt>msg&#60;/tt>&#10; is the sent buffer, and &#60;tt>error&#60;/tt> indicates whether the&#10; send was succesful, and if not, the cause of the failure.&#10;</long>
        </documentation>
        <interfacedef-ref qname="TossimPacketModel"/>
        <type-function size="I:1" alignment="I:1">
          <type-void size="I:1" alignment="I:1"></type-void>
          <function-parameters>
            <type-pointer size="I:4" alignment="I:4">
              <type-tag size="I:41" alignment="I:1"><nx_struct-ref name="message_t" ref="0x406f2838"/>
                <typename><typedef-ref name="message_t" ref="0x406f1600"/></typename>
              </type-tag>
            </type-pointer>
            <type-int cname="unsigned char" unsigned="" size="I:1" alignment="I:1">
              <typename><typedef-ref name="error_t" ref="0x405c8e98"/></typename>
            </type-int>
          </function-parameters>
        </type-function>
        <parameters>
          <variable name="msg" ref="0x408dc010" loc="76:/opt/tinyos-2.1.2/tos/lib/tossim/TossimPacketModel.nc">
            <type-pointer size="I:4" alignment="I:4">
              <type-tag size="I:41" alignment="I:1"><nx_struct-ref name="message_t" ref="0x406f2838"/>
                <typename><typedef-ref name="message_t" ref="0x406f1600"/></typename>
              </type-tag>
            </type-pointer>
          </variable>
          <variable name="error" ref="0x408dc208" loc="76:/opt/tinyos-2.1.2/tos/lib/tossim/TossimPacketModel.nc">
            <type-int cname="unsigned char" unsigned="" size="I:1" alignment="I:1">
              <typename><typedef-ref name="error_t" ref="0x405c8e98"/></typename>
            </type-int>
          </variable>
        </parameters>
      </function>
      <function event="" provided="0" name="shouldAck" ref="0x408db010" loc="87:/opt/tinyos-2.1.2/tos/lib/tossim/TossimPacketModel.nc">
        <interfacedef-ref qname="TossimPacketModel"/>
        <type-function size="I:1" alignment="I:1">
          <type-int cname="unsigned char" unsigned="" size="I:1" alignment="I:1">
            <typename><typedef-ref name="bool" ref="0x40521710"/></typename>
          </type-int>
          <function-parameters>
            <type-pointer size="I:4" alignment="I:4">
              <type-tag size="I:41" alignment="I:1"><nx_struct-ref name="message_t" ref="0x406f2838"/>
                <typename><typedef-ref name="message_t" ref="0x406f1600"/></typename>
              </type-tag>
            </type-pointer>
          </function-parameters>
        </type-function>
        <parameters>
          <variable name="msg" ref="0x408dcea0" loc="87:/opt/tinyos-2.1.2/tos/lib/tossim/TossimPacketModel.nc">
            <type-pointer size="I:4" alignment="I:4">
              <type-tag size="I:41" alignment="I:1"><nx_struct-ref name="message_t" ref="0x406f2838"/>
                <typename><typedef-ref name="message_t" ref="0x406f1600"/></typename>
              </type-tag>
            </type-pointer>
          </variable>
        </parameters>
      </function>
    </interfacedef>
    <interfacedef qname="HplAtm128Timer" loc="55:/opt/tinyos-2.1.2/tos/chips/atm128/timer/HplAtm128Timer.nc">
      <documentation loc="34:/opt/tinyos-2.1.2/tos/chips/atm128/timer/HplAtm128Timer.nc">
        <short>&#10; Basic interface to the hardware timers on an ATmega128.</short>
        <long>&#10; Basic interface to the hardware timers on an ATmega128.  &#10; &#60;p>&#10; This interface is designed to be independent of whether the underlying &#10; hardware is an 8-bit or 16-bit wide counter.  As such, timer_size is &#10; specified via a generics parameter.  Because this is exposing a common &#10; subset of functionality that all ATmega128 hardware timers share, all &#10; that is exposed is access to the overflow capability.  Compare and capture&#10; functionality are exposed on separate interfaces to allow easy &#10; configurability via wiring.&#10; &#60;p>&#10; This interface provides four major groups of functionality:&#60;ol>&#10;      &#60;li>Timer Value: get/set current time&#10;      &#60;li>Overflow Interrupt event&#10;      &#60;li>Control of Overflow Interrupt: start/stop/clear...&#10;      &#60;li>Timer Initialization: turn on/off clock source&#10; &#60;/ol>&#10;&#10; @author Martin Turon &#60;mturon@xbow.com>&#10;</long>
      </documentation>
      <parameters>
        <typedef name="timer_size" ref="0x40a1ebd8" loc="55:/opt/tinyos-2.1.2/tos/chips/atm128/timer/HplAtm128Timer.nc">
          <interfacedef-ref qname="HplAtm128Timer"/>
          <type-var size="U:" alignment="U:"><typedef-ref name="timer_size" scoped="" ref="0x40a1ebd8"/></type-var>
        </typedef>
      </parameters>
      <function command="" provided="0" name="off" ref="0x40a18438" loc="98:/opt/tinyos-2.1.2/tos/chips/atm128/timer/HplAtm128Timer.nc">
        <documentation loc="97:/opt/tinyos-2.1.2/tos/chips/atm128/timer/HplAtm128Timer.nc">
          <short> Turn off the clock.</short>
          <long> Turn off the clock. *</long>
        </documentation>
        <interfacedef-ref qname="HplAtm128Timer"/>
        <type-function size="I:1" alignment="I:1">
          <type-void size="I:1" alignment="I:1"></type-void>
          <function-parameters>
          </function-parameters>
        </type-function>
        <parameters>
        </parameters>
      </function>
      <function command="" provided="0" name="test" ref="0x40a19b08" loc="87:/opt/tinyos-2.1.2/tos/chips/atm128/timer/HplAtm128Timer.nc">
        <documentation loc="83:/opt/tinyos-2.1.2/tos/chips/atm128/timer/HplAtm128Timer.nc">
          <short> &#10; Did an overflow interrupt occur?&#10; </short>
          <long> &#10; Did an overflow interrupt occur?&#10; @return TRUE if overflow triggered, FALSE otherwise&#10;</long>
        </documentation>
        <interfacedef-ref qname="HplAtm128Timer"/>
        <type-function size="I:1" alignment="I:1">
          <type-int cname="unsigned char" unsigned="" size="I:1" alignment="I:1">
            <typename><typedef-ref name="bool" ref="0x40521710"/></typename>
          </type-int>
          <function-parameters>
          </function-parameters>
        </type-function>
        <parameters>
        </parameters>
      </function>
      <function command="" provided="0" name="get" ref="0x40a1b0f8" loc="61:/opt/tinyos-2.1.2/tos/chips/atm128/timer/HplAtm128Timer.nc">
        <documentation loc="57:/opt/tinyos-2.1.2/tos/chips/atm128/timer/HplAtm128Timer.nc">
          <short> &#10; Get the current time.</short>
          <long> &#10; Get the current time.&#10; @return  the current time&#10;</long>
        </documentation>
        <interfacedef-ref qname="HplAtm128Timer"/>
        <type-function size="I:1" alignment="I:1">
          <type-var size="U:" alignment="U:"><typedef-ref name="timer_size" scoped="" ref="0x40a1ebd8"/></type-var>
          <function-parameters>
          </function-parameters>
        </type-function>
        <parameters>
        </parameters>
      </function>
      <function command="" provided="0" name="setScale" ref="0x40a189c8" loc="104:/opt/tinyos-2.1.2/tos/chips/atm128/timer/HplAtm128Timer.nc">
        <documentation loc="100:/opt/tinyos-2.1.2/tos/chips/atm128/timer/HplAtm128Timer.nc">
          <short> &#10; Turn on the clock.</short>
          <long> &#10; Turn on the clock.&#10; @param scale   Prescaler setting of clock -- see Atm128Timer.h&#10;</long>
        </documentation>
        <interfacedef-ref qname="HplAtm128Timer"/>
        <type-function size="I:1" alignment="I:1">
          <type-void size="I:1" alignment="I:1"></type-void>
          <function-parameters>
            <type-int cname="unsigned char" unsigned="" size="I:1" alignment="I:1">
              <typename><typedef-ref name="uint8_t" ref="0x40218250"/></typename>
            </type-int>
          </function-parameters>
        </type-function>
        <parameters>
          <variable name="scale" ref="0x40a18870" loc="104:/opt/tinyos-2.1.2/tos/chips/atm128/timer/HplAtm128Timer.nc">
            <type-int cname="unsigned char" unsigned="" size="I:1" alignment="I:1">
              <typename><typedef-ref name="uint8_t" ref="0x40218250"/></typename>
            </type-int>
          </variable>
        </parameters>
      </function>
      <function command="" provided="0" name="getScale" ref="0x40a18e58" loc="110:/opt/tinyos-2.1.2/tos/chips/atm128/timer/HplAtm128Timer.nc">
        <documentation loc="106:/opt/tinyos-2.1.2/tos/chips/atm128/timer/HplAtm128Timer.nc">
          <short> &#10; Get prescaler setting.</short>
          <long> &#10; Get prescaler setting.&#10; @return  Prescaler setting of clock -- see Atm128Timer.h&#10;</long>
        </documentation>
        <interfacedef-ref qname="HplAtm128Timer"/>
        <type-function size="I:1" alignment="I:1">
          <type-int cname="unsigned char" unsigned="" size="I:1" alignment="I:1">
            <typename><typedef-ref name="uint8_t" ref="0x40218250"/></typename>
          </type-int>
          <function-parameters>
          </function-parameters>
        </type-function>
        <parameters>
        </parameters>
      </function>
      <function command="" provided="0" name="reset" ref="0x40a1bec0" loc="75:/opt/tinyos-2.1.2/tos/chips/atm128/timer/HplAtm128Timer.nc">
        <documentation loc="74:/opt/tinyos-2.1.2/tos/chips/atm128/timer/HplAtm128Timer.nc">
          <short> Clear the overflow interrupt flag.</short>
          <long> Clear the overflow interrupt flag. *</long>
        </documentation>
        <interfacedef-ref qname="HplAtm128Timer"/>
        <type-function size="I:1" alignment="I:1">
          <type-void size="I:1" alignment="I:1"></type-void>
          <function-parameters>
          </function-parameters>
        </type-function>
        <parameters>
        </parameters>
      </function>
      <function event="" provided="0" name="overflow" ref="0x40a1baa0" loc="70:/opt/tinyos-2.1.2/tos/chips/atm128/timer/HplAtm128Timer.nc">
        <documentation loc="69:/opt/tinyos-2.1.2/tos/chips/atm128/timer/HplAtm128Timer.nc">
          <short> Signalled on timer overflow interrupt.</short>
          <long> Signalled on timer overflow interrupt. *</long>
        </documentation>
        <interfacedef-ref qname="HplAtm128Timer"/>
        <type-function size="I:1" alignment="I:1">
          <type-void size="I:1" alignment="I:1"></type-void>
          <function-parameters>
          </function-parameters>
        </type-function>
        <parameters>
        </parameters>
      </function>
      <function command="" provided="0" name="isOn" ref="0x40a18010" loc="93:/opt/tinyos-2.1.2/tos/chips/atm128/timer/HplAtm128Timer.nc">
        <documentation loc="89:/opt/tinyos-2.1.2/tos/chips/atm128/timer/HplAtm128Timer.nc">
          <short> &#10; Is overflow interrupt on? &#10; </short>
          <long> &#10; Is overflow interrupt on? &#10; @return TRUE if overflow enabled, FALSE otherwise&#10;</long>
        </documentation>
        <interfacedef-ref qname="HplAtm128Timer"/>
        <type-function size="I:1" alignment="I:1">
          <type-int cname="unsigned char" unsigned="" size="I:1" alignment="I:1">
            <typename><typedef-ref name="bool" ref="0x40521710"/></typename>
          </type-int>
          <function-parameters>
          </function-parameters>
        </type-function>
        <parameters>
        </parameters>
      </function>
      <function command="" provided="0" name="set" ref="0x40a1b670" loc="67:/opt/tinyos-2.1.2/tos/chips/atm128/timer/HplAtm128Timer.nc">
        <documentation loc="63:/opt/tinyos-2.1.2/tos/chips/atm128/timer/HplAtm128Timer.nc">
          <short> &#10; Set the current time.</short>
          <long> &#10; Set the current time.&#10; @param t     the time to set&#10;</long>
        </documentation>
        <interfacedef-ref qname="HplAtm128Timer"/>
        <type-function size="I:1" alignment="I:1">
          <type-void size="I:1" alignment="I:1"></type-void>
          <function-parameters>
            <type-var size="U:" alignment="U:"><typedef-ref name="timer_size" scoped="" ref="0x40a1ebd8"/></type-var>
          </function-parameters>
        </type-function>
        <parameters>
          <variable name="t" ref="0x40a1b518" loc="67:/opt/tinyos-2.1.2/tos/chips/atm128/timer/HplAtm128Timer.nc">
            <type-var size="U:" alignment="U:"><typedef-ref name="timer_size" scoped="" ref="0x40a1ebd8"/></type-var>
          </variable>
        </parameters>
      </function>
      <function command="" provided="0" name="start" ref="0x40a192e8" loc="78:/opt/tinyos-2.1.2/tos/chips/atm128/timer/HplAtm128Timer.nc">
        <documentation loc="77:/opt/tinyos-2.1.2/tos/chips/atm128/timer/HplAtm128Timer.nc">
          <short> Enable the overflow interrupt.</short>
          <long> Enable the overflow interrupt. *</long>
        </documentation>
        <interfacedef-ref qname="HplAtm128Timer"/>
        <type-function size="I:1" alignment="I:1">
          <type-void size="I:1" alignment="I:1"></type-void>
          <function-parameters>
          </function-parameters>
        </type-function>
        <parameters>
        </parameters>
      </function>
      <function command="" provided="0" name="stop" ref="0x40a196e0" loc="81:/opt/tinyos-2.1.2/tos/chips/atm128/timer/HplAtm128Timer.nc">
        <documentation loc="80:/opt/tinyos-2.1.2/tos/chips/atm128/timer/HplAtm128Timer.nc">
          <short> Turn off overflow interrupts.</short>
          <long> Turn off overflow interrupts. *</long>
        </documentation>
        <interfacedef-ref qname="HplAtm128Timer"/>
        <type-function size="I:1" alignment="I:1">
          <type-void size="I:1" alignment="I:1"></type-void>
          <function-parameters>
          </function-parameters>
        </type-function>
        <parameters>
        </parameters>
      </function>
    </interfacedef>
    <interfacedef qname="AMPacket" loc="61:/opt/tinyos-2.1.2/tos/interfaces/AMPacket.nc">
      <documentation loc="42:/opt/tinyos-2.1.2/tos/interfaces/AMPacket.nc">
        <short>&#10; The Active Message accessors, which provide the AM local address and&#10; functionality for querying packets.</short>
        <long>&#10; The Active Message accessors, which provide the AM local address and&#10; functionality for querying packets. Active Messages are a single-hop&#10; communication protocol. Therefore, fields such as source and destination&#10; represent the single-hop source and destination. Multihop sources and&#10; destinations are defined by the corresponding multihop protocol (if any).&#10; Also see the Packet interface.&#10;&#10; @author Philip Levis &#10; @date   January 18 2005&#10; @see    Packet&#10; @see    AMSend&#10; @see    TEP 116: Packet Protocols&#10;</long>
      </documentation>
      <function command="" provided="0" name="group" ref="0x408d09e8" loc="177:/opt/tinyos-2.1.2/tos/interfaces/AMPacket.nc">
        <documentation loc="164:/opt/tinyos-2.1.2/tos/interfaces/AMPacket.nc">
          <short>&#10; Get the AM group of the AM packet.</short>
          <long>&#10; Get the AM group of the AM packet. The AM group is a logical&#10; identifier that distinguishes sets of nodes which may share&#10; a physical communication medium but wish to not communicate.&#10; The AM group logically separates the sets of nodes. When&#10; a node sends a packet, it fills in its AM group, and typically&#10; nodes only receive packets whose AM group field matches their&#10; own.&#10;&#10; @param 'message_t* ONE amsg' the packet&#10; @return the AM group of this packet&#10;</long>
        </documentation>
        <interfacedef-ref qname="AMPacket"/>
        <type-function size="I:1" alignment="I:1">
          <type-int cname="unsigned char" unsigned="" size="I:1" alignment="I:1">
            <typename><typedef-ref name="am_group_t" ref="0x406e83c0"/></typename>
          </type-int>
          <function-parameters>
            <type-pointer size="I:4" alignment="I:4">
              <type-tag size="I:41" alignment="I:1"><nx_struct-ref name="message_t" ref="0x406f2838"/>
                <typename><typedef-ref name="message_t" ref="0x406f1600"/></typename>
              </type-tag>
            </type-pointer>
          </function-parameters>
        </type-function>
        <parameters>
          <variable name="amsg" ref="0x408d0890" loc="177:/opt/tinyos-2.1.2/tos/interfaces/AMPacket.nc">
            <type-pointer size="I:4" alignment="I:4">
              <type-tag size="I:41" alignment="I:1"><nx_struct-ref name="message_t" ref="0x406f2838"/>
                <typename><typedef-ref name="message_t" ref="0x406f1600"/></typename>
              </type-tag>
            </type-pointer>
          </variable>
        </parameters>
      </function>
      <function command="" provided="0" name="source" ref="0x408b9168" loc="88:/opt/tinyos-2.1.2/tos/interfaces/AMPacket.nc">
        <documentation loc="80:/opt/tinyos-2.1.2/tos/interfaces/AMPacket.nc">
          <short>&#10; Return the AM address of the source of the AM packet.</short>
          <long>&#10; Return the AM address of the source of the AM packet.&#10; If &#60;tt>amsg&#60;/tt> is not an AM packet, the results of this command&#10; are undefined.&#10; @param 'message_t* ONE amsg'  the packet&#10; @return      the source address of the packet.&#10;</long>
        </documentation>
        <interfacedef-ref qname="AMPacket"/>
        <type-function size="I:1" alignment="I:1">
          <type-int cname="unsigned short" unsigned="" size="I:2" alignment="I:2">
            <typename><typedef-ref name="am_addr_t" ref="0x406e8620"/></typename>
          </type-int>
          <function-parameters>
            <type-pointer size="I:4" alignment="I:4">
              <type-tag size="I:41" alignment="I:1"><nx_struct-ref name="message_t" ref="0x406f2838"/>
                <typename><typedef-ref name="message_t" ref="0x406f1600"/></typename>
              </type-tag>
            </type-pointer>
          </function-parameters>
        </type-function>
        <parameters>
          <variable name="amsg" ref="0x408b9010" loc="88:/opt/tinyos-2.1.2/tos/interfaces/AMPacket.nc">
            <type-pointer size="I:4" alignment="I:4">
              <type-tag size="I:41" alignment="I:1"><nx_struct-ref name="message_t" ref="0x406f2838"/>
                <typename><typedef-ref name="message_t" ref="0x406f1600"/></typename>
              </type-tag>
            </type-pointer>
          </variable>
        </parameters>
      </function>
      <function command="" provided="0" name="address" ref="0x408bb010" loc="68:/opt/tinyos-2.1.2/tos/interfaces/AMPacket.nc">
        <documentation loc="63:/opt/tinyos-2.1.2/tos/interfaces/AMPacket.nc">
          <short>&#10; Return the node's active message address associated with this AM stack.</short>
          <long>&#10; Return the node's active message address associated with this AM stack.&#10; @return The address&#10;</long>
        </documentation>
        <interfacedef-ref qname="AMPacket"/>
        <type-function size="I:1" alignment="I:1">
          <type-int cname="unsigned short" unsigned="" size="I:2" alignment="I:2">
            <typename><typedef-ref name="am_addr_t" ref="0x406e8620"/></typename>
          </type-int>
          <function-parameters>
          </function-parameters>
        </type-function>
        <parameters>
        </parameters>
      </function>
      <function command="" provided="0" name="destination" ref="0x408bb6a8" loc="78:/opt/tinyos-2.1.2/tos/interfaces/AMPacket.nc">
        <documentation loc="70:/opt/tinyos-2.1.2/tos/interfaces/AMPacket.nc">
          <short>&#10; Return the AM address of the destination of the AM packet.</short>
          <long>&#10; Return the AM address of the destination of the AM packet.&#10; If &#60;tt>amsg&#60;/tt> is not an AM packet, the results of this command&#10; are undefined.&#10; @param 'message_t* ONE amsg'    the packet&#10; @return        the destination address of the packet.&#10;</long>
        </documentation>
        <interfacedef-ref qname="AMPacket"/>
        <type-function size="I:1" alignment="I:1">
          <type-int cname="unsigned short" unsigned="" size="I:2" alignment="I:2">
            <typename><typedef-ref name="am_addr_t" ref="0x406e8620"/></typename>
          </type-int>
          <function-parameters>
            <type-pointer size="I:4" alignment="I:4">
              <type-tag size="I:41" alignment="I:1"><nx_struct-ref name="message_t" ref="0x406f2838"/>
                <typename><typedef-ref name="message_t" ref="0x406f1600"/></typename>
              </type-tag>
            </type-pointer>
          </function-parameters>
        </type-function>
        <parameters>
          <variable name="amsg" ref="0x408bb550" loc="78:/opt/tinyos-2.1.2/tos/interfaces/AMPacket.nc">
            <type-pointer size="I:4" alignment="I:4">
              <type-tag size="I:41" alignment="I:1"><nx_struct-ref name="message_t" ref="0x406f2838"/>
                <typename><typedef-ref name="message_t" ref="0x406f1600"/></typename>
              </type-tag>
            </type-pointer>
          </variable>
        </parameters>
      </function>
      <function command="" provided="0" name="setSource" ref="0x408b8bd8" loc="121:/opt/tinyos-2.1.2/tos/interfaces/AMPacket.nc">
        <documentation loc="105:/opt/tinyos-2.1.2/tos/interfaces/AMPacket.nc">
          <short>&#10; Set the AM address of the source field of the AM packet.</short>
          <long>&#10; Set the AM address of the source field of the AM packet.  As&#10; the AM address is set as part of sending with the AMSend&#10; interface, this command is not used for sending packets.  Rather,&#10; it is used when a component, such as a queue, needs to buffer a&#10; request to send. The component can save the source address&#10; and then recover it when actually sending. As an AM layer generally&#10; sets the source address to be the local address, this interface&#10; is not commonly used except when a system is bypassing the AM&#10; layer (e.g., a protocol bridge). If &#60;tt>amsg&#60;/tt> is&#10; not an AM packet, the results of this command are undefined.&#10;&#10; @param  'message_t* ONE amsg'   the packet&#10; @param  addr   the address&#10;</long>
        </documentation>
        <interfacedef-ref qname="AMPacket"/>
        <type-function size="I:1" alignment="I:1">
          <type-void size="I:1" alignment="I:1"></type-void>
          <function-parameters>
            <type-pointer size="I:4" alignment="I:4">
              <type-tag size="I:41" alignment="I:1"><nx_struct-ref name="message_t" ref="0x406f2838"/>
                <typename><typedef-ref name="message_t" ref="0x406f1600"/></typename>
              </type-tag>
            </type-pointer>
            <type-int cname="unsigned short" unsigned="" size="I:2" alignment="I:2">
              <typename><typedef-ref name="am_addr_t" ref="0x406e8620"/></typename>
            </type-int>
          </function-parameters>
        </type-function>
        <parameters>
          <variable name="amsg" ref="0x408b8870" loc="121:/opt/tinyos-2.1.2/tos/interfaces/AMPacket.nc">
            <type-pointer size="I:4" alignment="I:4">
              <type-tag size="I:41" alignment="I:1"><nx_struct-ref name="message_t" ref="0x406f2838"/>
                <typename><typedef-ref name="message_t" ref="0x406f1600"/></typename>
              </type-tag>
            </type-pointer>
          </variable>
          <variable name="addr" ref="0x408b8a78" loc="121:/opt/tinyos-2.1.2/tos/interfaces/AMPacket.nc">
            <type-int cname="unsigned short" unsigned="" size="I:2" alignment="I:2">
              <typename><typedef-ref name="am_addr_t" ref="0x406e8620"/></typename>
            </type-int>
          </variable>
        </parameters>
      </function>
      <function command="" provided="0" name="setDestination" ref="0x408b9d50" loc="103:/opt/tinyos-2.1.2/tos/interfaces/AMPacket.nc">
        <documentation loc="90:/opt/tinyos-2.1.2/tos/interfaces/AMPacket.nc">
          <short>&#10; Set the AM address of the destination field of the AM packet.</short>
          <long>&#10; Set the AM address of the destination field of the AM packet.  As&#10; the AM address is set as part of sending with the AMSend&#10; interface, this command is not used for sending packets.  Rather,&#10; it is used when a component, such as a queue, needs to buffer a&#10; request to send. The component can save the destination address&#10; and then recover it when actually sending. If &#60;tt>amsg&#60;/tt> is&#10; not an AM packet, the results of this command are undefined.&#10;&#10; @param  'message_t* ONE amsg'   the packet&#10; @param  addr   the address&#10;</long>
        </documentation>
        <interfacedef-ref qname="AMPacket"/>
        <type-function size="I:1" alignment="I:1">
          <type-void size="I:1" alignment="I:1"></type-void>
          <function-parameters>
            <type-pointer size="I:4" alignment="I:4">
              <type-tag size="I:41" alignment="I:1"><nx_struct-ref name="message_t" ref="0x406f2838"/>
                <typename><typedef-ref name="message_t" ref="0x406f1600"/></typename>
              </type-tag>
            </type-pointer>
            <type-int cname="unsigned short" unsigned="" size="I:2" alignment="I:2">
              <typename><typedef-ref name="am_addr_t" ref="0x406e8620"/></typename>
            </type-int>
          </function-parameters>
        </type-function>
        <parameters>
          <variable name="amsg" ref="0x408b99e8" loc="103:/opt/tinyos-2.1.2/tos/interfaces/AMPacket.nc">
            <type-pointer size="I:4" alignment="I:4">
              <type-tag size="I:41" alignment="I:1"><nx_struct-ref name="message_t" ref="0x406f2838"/>
                <typename><typedef-ref name="message_t" ref="0x406f1600"/></typename>
              </type-tag>
            </type-pointer>
          </variable>
          <variable name="addr" ref="0x408b9bf0" loc="103:/opt/tinyos-2.1.2/tos/interfaces/AMPacket.nc">
            <type-int cname="unsigned short" unsigned="" size="I:2" alignment="I:2">
              <typename><typedef-ref name="am_addr_t" ref="0x406e8620"/></typename>
            </type-int>
          </variable>
        </parameters>
      </function>
      <function command="" provided="0" name="type" ref="0x408d2310" loc="147:/opt/tinyos-2.1.2/tos/interfaces/AMPacket.nc">
        <documentation loc="138:/opt/tinyos-2.1.2/tos/interfaces/AMPacket.nc">
          <short>&#10; Return the AM type of the AM packet.</short>
          <long>&#10; Return the AM type of the AM packet.&#10; If &#60;tt>amsg&#60;/tt> is not an AM packet, the results of this command&#10; are undefined.&#10;&#10; @param  'message_t* ONE amsg'   the packet&#10; @return        the AM type&#10;</long>
        </documentation>
        <interfacedef-ref qname="AMPacket"/>
        <type-function size="I:1" alignment="I:1">
          <type-int cname="unsigned char" unsigned="" size="I:1" alignment="I:1">
            <typename><typedef-ref name="am_id_t" ref="0x406e8168"/></typename>
          </type-int>
          <function-parameters>
            <type-pointer size="I:4" alignment="I:4">
              <type-tag size="I:41" alignment="I:1"><nx_struct-ref name="message_t" ref="0x406f2838"/>
                <typename><typedef-ref name="message_t" ref="0x406f1600"/></typename>
              </type-tag>
            </type-pointer>
          </function-parameters>
        </type-function>
        <parameters>
          <variable name="amsg" ref="0x408d21b8" loc="147:/opt/tinyos-2.1.2/tos/interfaces/AMPacket.nc">
            <type-pointer size="I:4" alignment="I:4">
              <type-tag size="I:41" alignment="I:1"><nx_struct-ref name="message_t" ref="0x406f2838"/>
                <typename><typedef-ref name="message_t" ref="0x406f1600"/></typename>
              </type-tag>
            </type-pointer>
          </variable>
        </parameters>
      </function>
      <function command="" provided="0" name="setType" ref="0x408d2e48" loc="162:/opt/tinyos-2.1.2/tos/interfaces/AMPacket.nc">
        <documentation loc="149:/opt/tinyos-2.1.2/tos/interfaces/AMPacket.nc">
          <short>&#10; Set the AM type of the AM packet.</short>
          <long>&#10; Set the AM type of the AM packet.  As the AM type is set as part&#10; of sending with the AMSend interface, this command is not used&#10; for sending packets. Instead, it is used when a component, such&#10; as a queue, needs to buffer a request to send. The component can&#10; save the AM type in the packet then recover it when actually&#10; sending. If &#60;tt>amsg&#60;/tt> is not an AM packet, the results of&#10; this command are undefined.&#10; &#10; @param  'message_t* ONE amsg'    the packet&#10; @param  t       the AM type&#10;</long>
        </documentation>
        <interfacedef-ref qname="AMPacket"/>
        <type-function size="I:1" alignment="I:1">
          <type-void size="I:1" alignment="I:1"></type-void>
          <function-parameters>
            <type-pointer size="I:4" alignment="I:4">
              <type-tag size="I:41" alignment="I:1"><nx_struct-ref name="message_t" ref="0x406f2838"/>
                <typename><typedef-ref name="message_t" ref="0x406f1600"/></typename>
              </type-tag>
            </type-pointer>
            <type-int cname="unsigned char" unsigned="" size="I:1" alignment="I:1">
              <typename><typedef-ref name="am_id_t" ref="0x406e8168"/></typename>
            </type-int>
          </function-parameters>
        </type-function>
        <parameters>
          <variable name="amsg" ref="0x408d2b18" loc="162:/opt/tinyos-2.1.2/tos/interfaces/AMPacket.nc">
            <type-pointer size="I:4" alignment="I:4">
              <type-tag size="I:41" alignment="I:1"><nx_struct-ref name="message_t" ref="0x406f2838"/>
                <typename><typedef-ref name="message_t" ref="0x406f1600"/></typename>
              </type-tag>
            </type-pointer>
          </variable>
          <variable name="t" ref="0x408d2ce8" loc="162:/opt/tinyos-2.1.2/tos/interfaces/AMPacket.nc">
            <type-int cname="unsigned char" unsigned="" size="I:1" alignment="I:1">
              <typename><typedef-ref name="am_id_t" ref="0x406e8168"/></typename>
            </type-int>
          </variable>
        </parameters>
      </function>
      <function command="" provided="0" name="isForMe" ref="0x408d17c0" loc="136:/opt/tinyos-2.1.2/tos/interfaces/AMPacket.nc">
        <documentation loc="123:/opt/tinyos-2.1.2/tos/interfaces/AMPacket.nc">
          <short>&#10; Return whether &#60;tt>amsg&#60;/tt> is destined for this mote.</short>
          <long>&#10; Return whether &#60;tt>amsg&#60;/tt> is destined for this mote. This is&#10; partially a shortcut for testing whether the return value of&#10; &#60;tt>destination&#60;/tt> and &#60;tt>address&#60;/tt> are the same. It&#10; may, however, include additional logic. For example, there&#10; may be an AM broadcast address: &#60;tt>destination&#60;/tt> will return&#10; the broadcast address, but &#60;tt>address&#60;/tt> will still be&#10; the mote's local address. If &#60;tt>amsg&#60;/tt> is not an AM packet,&#10; the results of this command are undefined.&#10;&#10; @param  'message_t* ONE amsg'   the packet&#10; @return        whether the packet is addressed to this AM stack&#10;</long>
        </documentation>
        <interfacedef-ref qname="AMPacket"/>
        <type-function size="I:1" alignment="I:1">
          <type-int cname="unsigned char" unsigned="" size="I:1" alignment="I:1">
            <typename><typedef-ref name="bool" ref="0x40521710"/></typename>
          </type-int>
          <function-parameters>
            <type-pointer size="I:4" alignment="I:4">
              <type-tag size="I:41" alignment="I:1"><nx_struct-ref name="message_t" ref="0x406f2838"/>
                <typename><typedef-ref name="message_t" ref="0x406f1600"/></typename>
              </type-tag>
            </type-pointer>
          </function-parameters>
        </type-function>
        <parameters>
          <variable name="amsg" ref="0x408d1668" loc="136:/opt/tinyos-2.1.2/tos/interfaces/AMPacket.nc">
            <type-pointer size="I:4" alignment="I:4">
              <type-tag size="I:41" alignment="I:1"><nx_struct-ref name="message_t" ref="0x406f2838"/>
                <typename><typedef-ref name="message_t" ref="0x406f1600"/></typename>
              </type-tag>
            </type-pointer>
          </variable>
        </parameters>
      </function>
      <function command="" provided="0" name="setGroup" ref="0x408ce688" loc="187:/opt/tinyos-2.1.2/tos/interfaces/AMPacket.nc">
        <documentation loc="179:/opt/tinyos-2.1.2/tos/interfaces/AMPacket.nc">
          <short>&#10; Set the AM group field of a packet.</short>
          <long>&#10; Set the AM group field of a packet. Note that most data link&#10; stacks will set this field automatically on a send request, which&#10; may overwrite changes made with this command.&#10;&#10; @param 'message_t* ONE amsg' the packet&#10; @param group the packet's new AM group value&#10;</long>
        </documentation>
        <interfacedef-ref qname="AMPacket"/>
        <type-function size="I:1" alignment="I:1">
          <type-void size="I:1" alignment="I:1"></type-void>
          <function-parameters>
            <type-pointer size="I:4" alignment="I:4">
              <type-tag size="I:41" alignment="I:1"><nx_struct-ref name="message_t" ref="0x406f2838"/>
                <typename><typedef-ref name="message_t" ref="0x406f1600"/></typename>
              </type-tag>
            </type-pointer>
            <type-int cname="unsigned char" unsigned="" size="I:1" alignment="I:1">
              <typename><typedef-ref name="am_group_t" ref="0x406e83c0"/></typename>
            </type-int>
          </function-parameters>
        </type-function>
        <parameters>
          <variable name="amsg" ref="0x408ce328" loc="187:/opt/tinyos-2.1.2/tos/interfaces/AMPacket.nc">
            <type-pointer size="I:4" alignment="I:4">
              <type-tag size="I:41" alignment="I:1"><nx_struct-ref name="message_t" ref="0x406f2838"/>
                <typename><typedef-ref name="message_t" ref="0x406f1600"/></typename>
              </type-tag>
            </type-pointer>
          </variable>
          <variable name="grp" ref="0x408ce528" loc="187:/opt/tinyos-2.1.2/tos/interfaces/AMPacket.nc">
            <type-int cname="unsigned char" unsigned="" size="I:1" alignment="I:1">
              <typename><typedef-ref name="am_group_t" ref="0x406e83c0"/></typename>
            </type-int>
          </variable>
        </parameters>
      </function>
      <function command="" provided="0" name="localGroup" ref="0x408cef00" loc="195:/opt/tinyos-2.1.2/tos/interfaces/AMPacket.nc">
        <documentation loc="189:/opt/tinyos-2.1.2/tos/interfaces/AMPacket.nc">
          <short>&#10; Provides the current AM group of this communication interface.</short>
          <long>&#10; Provides the current AM group of this communication interface.&#10;&#10; @return The AM group.&#10;</long>
        </documentation>
        <interfacedef-ref qname="AMPacket"/>
        <type-function size="I:1" alignment="I:1">
          <type-int cname="unsigned char" unsigned="" size="I:1" alignment="I:1">
            <typename><typedef-ref name="am_group_t" ref="0x406e83c0"/></typename>
          </type-int>
          <function-parameters>
          </function-parameters>
        </type-function>
        <parameters>
        </parameters>
      </function>
    </interfacedef>
    <interfacedef qname="Scheduler" loc="52:/opt/tinyos-2.1.2/tos/interfaces/Scheduler.nc">
      <documentation loc="42:/opt/tinyos-2.1.2/tos/interfaces/Scheduler.nc">
        <short> &#10; The interface to a TinyOS task scheduler.</short>
        <long> &#10; The interface to a TinyOS task scheduler.&#10;&#10; @author Philip Levis&#10; @date   January 19 2005&#10; @see TEP 106: Tasks and Schedulers&#10; @see TEP 107: Boot Sequence&#10;</long>
      </documentation>
      <function command="" provided="0" name="init" ref="0x40714bc8" loc="57:/opt/tinyos-2.1.2/tos/interfaces/Scheduler.nc">
        <documentation loc="54:/opt/tinyos-2.1.2/tos/interfaces/Scheduler.nc">
          <short> &#10; Initialize the scheduler.</short>
          <long> &#10; Initialize the scheduler.&#10;</long>
        </documentation>
        <interfacedef-ref qname="Scheduler"/>
        <type-function size="I:1" alignment="I:1">
          <type-void size="I:1" alignment="I:1"></type-void>
          <function-parameters>
          </function-parameters>
        </type-function>
        <parameters>
        </parameters>
      </function>
      <function command="" provided="0" name="taskLoop" ref="0x403e9500" loc="72:/opt/tinyos-2.1.2/tos/interfaces/Scheduler.nc">
        <documentation loc="67:/opt/tinyos-2.1.2/tos/interfaces/Scheduler.nc">
          <short>&#10; Enter an infinite task-running loop.</short>
          <long>&#10; Enter an infinite task-running loop. Put the MCU into a low power&#10; state when the processor is idle (task queue empty, waiting for&#10; interrupts). This call never returns.&#10;</long>
        </documentation>
        <interfacedef-ref qname="Scheduler"/>
        <type-function size="I:1" alignment="I:1">
          <type-void size="I:1" alignment="I:1"></type-void>
          <function-parameters>
          </function-parameters>
        </type-function>
        <parameters>
        </parameters>
      </function>
      <function command="" provided="0" name="runNextTask" ref="0x403e9038" loc="65:/opt/tinyos-2.1.2/tos/interfaces/Scheduler.nc">
        <documentation loc="59:/opt/tinyos-2.1.2/tos/interfaces/Scheduler.nc">
          <short> &#10; Run the next task if one is waiting, otherwise return immediately.</short>
          <long> &#10; Run the next task if one is waiting, otherwise return immediately. &#10;&#10; @return        whether a task was run -- TRUE indicates a task&#10;                ran, FALSE indicates there was no task to run.&#10;</long>
        </documentation>
        <interfacedef-ref qname="Scheduler"/>
        <type-function size="I:1" alignment="I:1">
          <type-int cname="unsigned char" unsigned="" size="I:1" alignment="I:1">
            <typename><typedef-ref name="bool" ref="0x40521710"/></typename>
          </type-int>
          <function-parameters>
          </function-parameters>
        </type-function>
        <parameters>
        </parameters>
      </function>
    </interfacedef>
    <interfacedef qname="Timer" loc="53:/opt/tinyos-2.1.2/tos/lib/timer/Timer.nc">
      <documentation loc="36:/opt/tinyos-2.1.2/tos/lib/timer/Timer.nc">
        <short>&#10; A Timer is TinyOS's general purpose timing interface.</short>
        <long>&#10; A Timer is TinyOS's general purpose timing interface. For more precise&#10; timing, you may wish to use a (platform-specific) component offering&#10; an Alarm interface.&#10;&#10; &#60;p>A Timer is parameterised by its &#34;precision&#34; (milliseconds,&#10; microseconds, etc), identified by a type. This prevents, e.g.,&#10; unintentionally mixing components expecting milliseconds with those&#10; expecting microseconds as those interfaces have a different type.&#10;&#10; &#60;p>See TEP102 for more details.&#10;&#10; @param precision_tag A type indicating the precision of this Alarm.&#10;&#10; @author Cory Sharp &#60;cssharp@eecs.berkeley.edu>&#10;</long>
      </documentation>
      <parameters>
        <typedef name="precision_tag" ref="0x40a0b360" loc="53:/opt/tinyos-2.1.2/tos/lib/timer/Timer.nc">
          <interfacedef-ref qname="Timer"/>
          <type-var size="U:" alignment="U:"><typedef-ref name="precision_tag" scoped="" ref="0x40a0b360"/></type-var>
        </typedef>
      </parameters>
      <function command="" provided="0" name="getNow" ref="0x40a08ac0" loc="136:/opt/tinyos-2.1.2/tos/lib/timer/Timer.nc">
        <documentation loc="132:/opt/tinyos-2.1.2/tos/lib/timer/Timer.nc">
          <short>&#10; Return the current time.</short>
          <long>&#10; Return the current time.&#10; @return Current time.&#10;</long>
        </documentation>
        <interfacedef-ref qname="Timer"/>
        <type-function size="I:1" alignment="I:1">
          <type-int cname="unsigned int" unsigned="" size="I:4" alignment="I:4">
            <typename><typedef-ref name="uint32_t" ref="0x402186b0"/></typename>
          </type-int>
          <function-parameters>
          </function-parameters>
        </type-function>
        <parameters>
        </parameters>
      </function>
      <function event="" provided="0" name="fired" ref="0x40a0a920" loc="83:/opt/tinyos-2.1.2/tos/lib/timer/Timer.nc">
        <documentation loc="80:/opt/tinyos-2.1.2/tos/lib/timer/Timer.nc">
          <short>&#10; Signaled when the timer expires (one-shot) or repeats (periodic).</short>
          <long>&#10; Signaled when the timer expires (one-shot) or repeats (periodic).&#10;</long>
        </documentation>
        <interfacedef-ref qname="Timer"/>
        <type-function size="I:1" alignment="I:1">
          <type-void size="I:1" alignment="I:1"></type-void>
          <function-parameters>
          </function-parameters>
        </type-function>
        <parameters>
        </parameters>
      </function>
      <function command="" provided="0" name="startPeriodicAt" ref="0x40a09a80" loc="114:/opt/tinyos-2.1.2/tos/lib/timer/Timer.nc">
        <documentation loc="100:/opt/tinyos-2.1.2/tos/lib/timer/Timer.nc">
          <short>&#10; Set a periodic timer to repeat every dt time units.</short>
          <long>&#10; Set a periodic timer to repeat every dt time units. Replaces any&#10; current timer settings. The &#60;code>fired&#60;/code> will be signaled every&#10; dt units (first event at t0+dt units). Periodic timers set in the past&#10; will get a bunch of events in succession, until the timer &#34;catches up&#34;.&#10;&#10; &#60;p>Because the current time may wrap around, it is possible to use&#10; values of t0 greater than the &#60;code>getNow&#60;/code>'s result. These&#10; values represent times in the past, i.e., the time at which getNow()&#10; would last of returned that value.&#10;&#10; @param t0 Base time for timer.&#10; @param dt Time until the timer fires.&#10;</long>
        </documentation>
        <interfacedef-ref qname="Timer"/>
        <type-function size="I:1" alignment="I:1">
          <type-void size="I:1" alignment="I:1"></type-void>
          <function-parameters>
            <type-int cname="unsigned int" unsigned="" size="I:4" alignment="I:4">
              <typename><typedef-ref name="uint32_t" ref="0x402186b0"/></typename>
            </type-int>
            <type-int cname="unsigned int" unsigned="" size="I:4" alignment="I:4">
              <typename><typedef-ref name="uint32_t" ref="0x402186b0"/></typename>
            </type-int>
          </function-parameters>
        </type-function>
        <parameters>
          <variable name="t0" ref="0x40a09738" loc="114:/opt/tinyos-2.1.2/tos/lib/timer/Timer.nc">
            <type-int cname="unsigned int" unsigned="" size="I:4" alignment="I:4">
              <typename><typedef-ref name="uint32_t" ref="0x402186b0"/></typename>
            </type-int>
          </variable>
          <variable name="dt" ref="0x40a09920" loc="114:/opt/tinyos-2.1.2/tos/lib/timer/Timer.nc">
            <type-int cname="unsigned int" unsigned="" size="I:4" alignment="I:4">
              <typename><typedef-ref name="uint32_t" ref="0x402186b0"/></typename>
            </type-int>
          </variable>
        </parameters>
      </function>
      <function command="" provided="0" name="isOneShot" ref="0x40a09290" loc="98:/opt/tinyos-2.1.2/tos/lib/timer/Timer.nc">
        <documentation loc="94:/opt/tinyos-2.1.2/tos/lib/timer/Timer.nc">
          <short>&#10; Check if this is a one-shot timer.</short>
          <long>&#10; Check if this is a one-shot timer.&#10; @return TRUE for one-shot timers, FALSE for periodic timers.&#10;</long>
        </documentation>
        <interfacedef-ref qname="Timer"/>
        <type-function size="I:1" alignment="I:1">
          <type-int cname="unsigned char" unsigned="" size="I:1" alignment="I:1">
            <typename><typedef-ref name="bool" ref="0x40521710"/></typename>
          </type-int>
          <function-parameters>
          </function-parameters>
        </type-function>
        <parameters>
        </parameters>
      </function>
      <function command="" provided="0" name="getdt" ref="0x40a06460" loc="151:/opt/tinyos-2.1.2/tos/lib/timer/Timer.nc">
        <documentation loc="146:/opt/tinyos-2.1.2/tos/lib/timer/Timer.nc">
          <short>&#10; Return the delay or period for the previously started timer.</short>
          <long>&#10; Return the delay or period for the previously started timer. The next&#10; fired event will occur at gett0() + getdt().&#10; @return Timer's interval.&#10;</long>
        </documentation>
        <interfacedef-ref qname="Timer"/>
        <type-function size="I:1" alignment="I:1">
          <type-int cname="unsigned int" unsigned="" size="I:4" alignment="I:4">
            <typename><typedef-ref name="uint32_t" ref="0x402186b0"/></typename>
          </type-int>
          <function-parameters>
          </function-parameters>
        </type-function>
        <parameters>
        </parameters>
      </function>
      <function command="" provided="0" name="gett0" ref="0x40a08f08" loc="144:/opt/tinyos-2.1.2/tos/lib/timer/Timer.nc">
        <documentation loc="138:/opt/tinyos-2.1.2/tos/lib/timer/Timer.nc">
          <short>&#10; Return the time anchor for the previously started timer or the time of&#10; the previous event for periodic timers.</short>
          <long>&#10; Return the time anchor for the previously started timer or the time of&#10; the previous event for periodic timers. The next fired event will occur&#10; at gett0() + getdt().&#10; @return Timer's base time.&#10;</long>
        </documentation>
        <interfacedef-ref qname="Timer"/>
        <type-function size="I:1" alignment="I:1">
          <type-int cname="unsigned int" unsigned="" size="I:4" alignment="I:4">
            <typename><typedef-ref name="uint32_t" ref="0x402186b0"/></typename>
          </type-int>
          <function-parameters>
          </function-parameters>
        </type-function>
        <parameters>
        </parameters>
      </function>
      <function command="" provided="0" name="isRunning" ref="0x40a0adb0" loc="92:/opt/tinyos-2.1.2/tos/lib/timer/Timer.nc">
        <documentation loc="86:/opt/tinyos-2.1.2/tos/lib/timer/Timer.nc">
          <short>&#10; Check if timer is running.</short>
          <long>&#10; Check if timer is running. Periodic timers run until stopped or&#10; replaced, one-shot timers run until their deadline expires.&#10;&#10; @return TRUE if the timer is still running.&#10;</long>
        </documentation>
        <interfacedef-ref qname="Timer"/>
        <type-function size="I:1" alignment="I:1">
          <type-int cname="unsigned char" unsigned="" size="I:1" alignment="I:1">
            <typename><typedef-ref name="bool" ref="0x40521710"/></typename>
          </type-int>
          <function-parameters>
          </function-parameters>
        </type-function>
        <parameters>
        </parameters>
      </function>
      <function command="" provided="0" name="startPeriodic" ref="0x40a0b9b8" loc="64:/opt/tinyos-2.1.2/tos/lib/timer/Timer.nc">
        <documentation loc="56:/opt/tinyos-2.1.2/tos/lib/timer/Timer.nc">
          <short>&#10; Set a periodic timer to repeat every dt time units.</short>
          <long>&#10; Set a periodic timer to repeat every dt time units. Replaces any&#10; current timer settings. Equivalent to startPeriodicAt(getNow(),&#10; dt). The &#60;code>fired&#60;/code> will be signaled every dt units (first&#10; event in dt units).&#10;&#10; @param dt Time until the timer fires.&#10;</long>
        </documentation>
        <interfacedef-ref qname="Timer"/>
        <type-function size="I:1" alignment="I:1">
          <type-void size="I:1" alignment="I:1"></type-void>
          <function-parameters>
            <type-int cname="unsigned int" unsigned="" size="I:4" alignment="I:4">
              <typename><typedef-ref name="uint32_t" ref="0x402186b0"/></typename>
            </type-int>
          </function-parameters>
        </type-function>
        <parameters>
          <variable name="dt" ref="0x40a0b860" loc="64:/opt/tinyos-2.1.2/tos/lib/timer/Timer.nc">
            <type-int cname="unsigned int" unsigned="" size="I:4" alignment="I:4">
              <typename><typedef-ref name="uint32_t" ref="0x402186b0"/></typename>
            </type-int>
          </variable>
        </parameters>
      </function>
      <function command="" provided="0" name="startOneShotAt" ref="0x40a084a0" loc="129:/opt/tinyos-2.1.2/tos/lib/timer/Timer.nc">
        <documentation loc="116:/opt/tinyos-2.1.2/tos/lib/timer/Timer.nc">
          <short>&#10; Set a single-short timer to time t0+dt.</short>
          <long>&#10; Set a single-short timer to time t0+dt. Replaces any current timer&#10; settings. The &#60;code>fired&#60;/code> will be signaled when the timer&#10; expires. Timers set in the past will fire &#34;soon&#34;.&#10;&#10; &#60;p>Because the current time may wrap around, it is possible to use&#10; values of t0 greater than the &#60;code>getNow&#60;/code>'s result. These&#10; values represent times in the past, i.e., the time at which getNow()&#10; would last of returned that value.&#10;&#10; @param t0 Base time for timer.&#10; @param dt Time until the timer fires.&#10;</long>
        </documentation>
        <interfacedef-ref qname="Timer"/>
        <type-function size="I:1" alignment="I:1">
          <type-void size="I:1" alignment="I:1"></type-void>
          <function-parameters>
            <type-int cname="unsigned int" unsigned="" size="I:4" alignment="I:4">
              <typename><typedef-ref name="uint32_t" ref="0x402186b0"/></typename>
            </type-int>
            <type-int cname="unsigned int" unsigned="" size="I:4" alignment="I:4">
              <typename><typedef-ref name="uint32_t" ref="0x402186b0"/></typename>
            </type-int>
          </function-parameters>
        </type-function>
        <parameters>
          <variable name="t0" ref="0x40a08158" loc="129:/opt/tinyos-2.1.2/tos/lib/timer/Timer.nc">
            <type-int cname="unsigned int" unsigned="" size="I:4" alignment="I:4">
              <typename><typedef-ref name="uint32_t" ref="0x402186b0"/></typename>
            </type-int>
          </variable>
          <variable name="dt" ref="0x40a08340" loc="129:/opt/tinyos-2.1.2/tos/lib/timer/Timer.nc">
            <type-int cname="unsigned int" unsigned="" size="I:4" alignment="I:4">
              <typename><typedef-ref name="uint32_t" ref="0x402186b0"/></typename>
            </type-int>
          </variable>
        </parameters>
      </function>
      <function command="" provided="0" name="startOneShot" ref="0x40a0a088" loc="73:/opt/tinyos-2.1.2/tos/lib/timer/Timer.nc">
        <documentation loc="66:/opt/tinyos-2.1.2/tos/lib/timer/Timer.nc">
          <short>&#10; Set a single-short timer to some time units in the future.</short>
          <long>&#10; Set a single-short timer to some time units in the future. Replaces&#10; any current timer settings. Equivalent to startOneShotAt(getNow(),&#10; dt). The &#60;code>fired&#60;/code> will be signaled when the timer expires.&#10;&#10; @param dt Time until the timer fires.&#10;</long>
        </documentation>
        <interfacedef-ref qname="Timer"/>
        <type-function size="I:1" alignment="I:1">
          <type-void size="I:1" alignment="I:1"></type-void>
          <function-parameters>
            <type-int cname="unsigned int" unsigned="" size="I:4" alignment="I:4">
              <typename><typedef-ref name="uint32_t" ref="0x402186b0"/></typename>
            </type-int>
          </function-parameters>
        </type-function>
        <parameters>
          <variable name="dt" ref="0x40a0bef8" loc="73:/opt/tinyos-2.1.2/tos/lib/timer/Timer.nc">
            <type-int cname="unsigned int" unsigned="" size="I:4" alignment="I:4">
              <typename><typedef-ref name="uint32_t" ref="0x402186b0"/></typename>
            </type-int>
          </variable>
        </parameters>
      </function>
      <function command="" provided="0" name="stop" ref="0x40a0a558" loc="78:/opt/tinyos-2.1.2/tos/lib/timer/Timer.nc">
        <documentation loc="75:/opt/tinyos-2.1.2/tos/lib/timer/Timer.nc">
          <short>&#10; Cancel a timer.</short>
          <long>&#10; Cancel a timer.&#10;</long>
        </documentation>
        <interfacedef-ref qname="Timer"/>
        <type-function size="I:1" alignment="I:1">
          <type-void size="I:1" alignment="I:1"></type-void>
          <function-parameters>
          </function-parameters>
        </type-function>
        <parameters>
        </parameters>
      </function>
    </interfacedef>
  </interfacedefs>
  <tags>
    <struct name="__pthread_mutex_s" loc="56:/usr/include/i386-linux-gnu/bits/pthreadtypes.h" ref="0x40366c10" defined="" size="I:24" alignment="I:4">
      <field name="__lock" ref="0x40365740" bit-offset="I:0" size="I:4">
        <type-int cname="int" size="I:4" alignment="I:4"></type-int>
      </field>
      <field name="__count" ref="0x403657a0" bit-offset="I:32" size="I:4">
        <type-int cname="unsigned int" unsigned="" size="I:4" alignment="I:4"></type-int>
      </field>
      <field name="__owner" ref="0x40365800" bit-offset="I:64" size="I:4">
        <type-int cname="int" size="I:4" alignment="I:4"></type-int>
      </field>
      <field name="__kind" ref="0x40365860" bit-offset="I:96" size="I:4">
        <type-int cname="int" size="I:4" alignment="I:4"></type-int>
      </field>
      <field name="__nusers" ref="0x403658c0" bit-offset="I:128" size="I:4">
        <type-int cname="unsigned int" unsigned="" size="I:4" alignment="I:4"></type-int>
      </field>
      <field name="__spins" ref="0x40365920" bit-offset="I:160" size="I:4">
        <type-int cname="int" size="I:4" alignment="I:4"></type-int>
      </field>
      <field name="__list" ref="0x40365980" bit-offset="I:160" size="I:4">
        <type-tag size="I:4" alignment="I:4"><struct-ref name="__pthread_internal_slist" ref="0x403664f0"/>
          <typename><typedef-ref name="__pthread_slist_t" ref="0x403669a0"/></typename>
        </type-tag>
      </field>
    </struct>
    <enum loc="138:/opt/tinyos-2.1.2/tos/chips/atm128/adc/Atm128Adc.h" ref="0x4078ee68" defined="" size="I:4" alignment="I:4">
      <type-int cname="int" size="I:4" alignment="I:4"></type-int>
    </enum>
    <enum loc="54:/opt/tinyos-2.1.2/tos/platforms/micaz/sim/platform_hardware.h" ref="0x407a2010" defined="" size="I:4" alignment="I:4">
      <type-int cname="int" size="I:4" alignment="I:4"></type-int>
    </enum>
    <attribute name="bnd" loc="9:/usr/lib/ncc/deputy_nodeputy.h" ref="0x4020f0f8" defined="" size="I:8" alignment="I:4">
      <field name="lo" ref="0x4020f358" bit-offset="I:0" size="I:4">
        <type-pointer size="I:4" alignment="I:4">
          <type-void size="I:1" alignment="I:1"></type-void>
        </type-pointer>
      </field>
      <field name="hi" ref="0x4020f3b8" bit-offset="I:32" size="I:4">
        <type-pointer size="I:4" alignment="I:4">
          <type-void size="I:1" alignment="I:1"></type-void>
        </type-pointer>
      </field>
    </attribute>
    <union loc="133:/opt/tinyos-2.1.2/tos/chips/atm128/timer/Atm128Timer.h" ref="0x4179a130" defined="" size="I:1" alignment="I:1">
      <field name="flat" ref="0x4179a240" bit-offset="I:0" size="I:1">
        <type-int cname="unsigned char" unsigned="" size="I:1" alignment="I:1">
          <typename><typedef-ref name="uint8_t" ref="0x40218250"/></typename>
        </type-int>
      </field>
      <field name="bits" ref="0x4179a2a0" bit-offset="I:0" size="I:1">
        <type-tag size="I:1" alignment="I:1"><struct-ref ref="0x4179bbc0"/></type-tag>
      </field>
    </union>
    <enum loc="211:/opt/tinyos-2.1.2/tos/chips/atm128/timer/Atm128Timer.h" ref="0x41793088" defined="" size="I:4" alignment="I:4">
      <type-int cname="int" size="I:4" alignment="I:4"></type-int>
    </enum>
    <struct loc="300:/opt/tinyos-2.1.2/tos/chips/atm128/timer/Atm128Timer.h" ref="0x40a3a878" defined="" size="I:1" alignment="I:1">
      <field name="ocie1c" ref="0x40a3a988" bit-offset="I:0" bit-size="I:1">
        <type-int cname="unsigned char" unsigned="" size="I:1" alignment="I:1">
          <typename><typedef-ref name="uint8_t" ref="0x40218250"/></typename>
        </type-int>
      </field>
      <field name="ocie3c" ref="0x40a3a9e8" bit-offset="I:1" bit-size="I:1">
        <type-int cname="unsigned char" unsigned="" size="I:1" alignment="I:1">
          <typename><typedef-ref name="uint8_t" ref="0x40218250"/></typename>
        </type-int>
      </field>
      <field name="toie3" ref="0x40a3aa48" bit-offset="I:2" bit-size="I:1">
        <type-int cname="unsigned char" unsigned="" size="I:1" alignment="I:1">
          <typename><typedef-ref name="uint8_t" ref="0x40218250"/></typename>
        </type-int>
      </field>
      <field name="ocie3b" ref="0x40a3aaa8" bit-offset="I:3" bit-size="I:1">
        <type-int cname="unsigned char" unsigned="" size="I:1" alignment="I:1">
          <typename><typedef-ref name="uint8_t" ref="0x40218250"/></typename>
        </type-int>
      </field>
      <field name="ocie3a" ref="0x40a3ab08" bit-offset="I:4" bit-size="I:1">
        <type-int cname="unsigned char" unsigned="" size="I:1" alignment="I:1">
          <typename><typedef-ref name="uint8_t" ref="0x40218250"/></typename>
        </type-int>
      </field>
      <field name="ticie3" ref="0x40a3ab68" bit-offset="I:5" bit-size="I:1">
        <type-int cname="unsigned char" unsigned="" size="I:1" alignment="I:1">
          <typename><typedef-ref name="uint8_t" ref="0x40218250"/></typename>
        </type-int>
      </field>
      <field name="rsvd" ref="0x40a3abc8" bit-offset="I:6" bit-size="I:2">
        <type-int cname="unsigned char" unsigned="" size="I:1" alignment="I:1">
          <typename><typedef-ref name="uint8_t" ref="0x40218250"/></typename>
        </type-int>
      </field>
    </struct>
    <struct loc="106:/usr/include/stdlib.h" ref="0x40336190" defined="" size="I:8" alignment="I:4">
      <field name="quot" ref="0x403362a0" bit-offset="I:0" size="I:4">
        <type-int cname="long" size="I:4" alignment="I:4"></type-int>
      </field>
      <field name="rem" ref="0x40336300" bit-offset="I:32" size="I:4">
        <type-int cname="long" size="I:4" alignment="I:4"></type-int>
      </field>
    </struct>
    <union loc="250:/opt/tinyos-2.1.2/tos/chips/atm128/timer/Atm128Timer.h" ref="0x40a40d58" defined="" size="I:1" alignment="I:1">
      <field name="flat" ref="0x40a40e68" bit-offset="I:0" size="I:1">
        <type-int cname="unsigned char" unsigned="" size="I:1" alignment="I:1">
          <typename><typedef-ref name="uint8_t" ref="0x40218250"/></typename>
        </type-int>
      </field>
      <field name="bits" ref="0x40a40ec8" bit-offset="I:0" size="I:1">
        <type-tag size="I:1" alignment="I:1"><struct-ref ref="0x40a40938"/></type-tag>
      </field>
    </union>
    <struct name="itimerspec" loc="161:/usr/include/time.h" ref="0x40658f50" defined="" size="I:16" alignment="I:4">
      <field name="it_interval" ref="0x406563a8" bit-offset="I:0" size="I:8">
        <type-tag size="I:8" alignment="I:4"><struct-ref name="timespec" ref="0x40359980"/></type-tag>
      </field>
      <field name="it_value" ref="0x40656408" bit-offset="I:64" size="I:8">
        <type-tag size="I:8" alignment="I:4"><struct-ref name="timespec" ref="0x40359980"/></type-tag>
      </field>
    </struct>
    <nx_struct name="tossim_metadata" loc="18:/opt/tinyos-2.1.2/tos/lib/tossim/TossimRadioMsg.h" ref="0x406e63e8" defined="" size="I:4" alignment="I:1">
      <field name="strength" ref="0x406e6978" bit-offset="I:0" size="I:1">
        <type-int cname="signed char" size="I:1" alignment="I:1" network="nx_int8_t">
          <typename><typedef-ref name="nx_int8_t" ref="0x402fc5a0"/></typename>
        </type-int>
      </field>
      <field name="ack" ref="0x406e69d8" bit-offset="I:8" size="I:1">
        <type-int cname="unsigned char" unsigned="" size="I:1" alignment="I:1" network="nx_uint8_t">
          <typename><typedef-ref name="nx_uint8_t" ref="0x40301728"/></typename>
        </type-int>
      </field>
      <field name="time" ref="0x406e6a38" bit-offset="I:16" size="I:2">
        <type-int cname="unsigned short" unsigned="" size="I:2" alignment="I:1" network="nx_uint16_t">
          <typename><typedef-ref name="nx_uint16_t" ref="0x40301ba0"/></typename>
        </type-int>
      </field>
    </nx_struct>
    <union loc="193:/opt/tinyos-2.1.2/tos/chips/atm128/timer/Atm128Timer.h" ref="0x41795668" defined="" size="I:1" alignment="I:1">
      <field name="flat" ref="0x41795778" bit-offset="I:0" size="I:1">
        <type-int cname="unsigned char" unsigned="" size="I:1" alignment="I:1">
          <typename><typedef-ref name="uint8_t" ref="0x40218250"/></typename>
        </type-int>
      </field>
      <field name="bits" ref="0x417957d8" bit-offset="I:0" size="I:1">
        <type-tag size="I:1" alignment="I:1"><struct-ref ref="0x41795230"/></type-tag>
      </field>
    </union>
    <union loc="141:/usr/include/i386-linux-gnu/bits/pthreadtypes.h" ref="0x40370958" defined="" size="I:8" alignment="I:4">
      <field name="__size" ref="0x40370c68" bit-offset="I:0" size="I:8">
        <type-array elements="I:8" size="I:8" alignment="I:1">
          <type-int cname="char" size="I:1" alignment="I:1"></type-int>
        </type-array>
      </field>
      <field name="__align" ref="0x40370cc8" bit-offset="I:0" size="I:4">
        <type-int cname="long" size="I:4" alignment="I:4"></type-int>
      </field>
    </union>
    <union loc="101:/usr/include/i386-linux-gnu/bits/pthreadtypes.h" ref="0x4036d2f0" defined="" size="I:4" alignment="I:4">
      <field name="__size" ref="0x4036d400" bit-offset="I:0" size="I:4">
        <type-array elements="I:4" size="I:4" alignment="I:1">
          <type-int cname="char" size="I:1" alignment="I:1"></type-int>
        </type-array>
      </field>
      <field name="__align" ref="0x4036d460" bit-offset="I:0" size="I:4">
        <type-int cname="long" size="I:4" alignment="I:4"></type-int>
      </field>
    </union>
    <struct name="gain_entry" loc="53:/opt/tinyos-2.1.2/tos/lib/tossim/sim_gain.h" ref="0x4060c930" defined="" size="I:16" alignment="I:4">
      <field name="mote" ref="0x4060cdf8" bit-offset="I:0" size="I:4">
        <type-int cname="int" size="I:4" alignment="I:4"></type-int>
      </field>
      <field name="gain" ref="0x4060ce58" bit-offset="I:32" size="I:8">
        <type-float cname="double" size="I:8" alignment="I:8"></type-float>
      </field>
      <field name="next" ref="0x4060ceb8" bit-offset="I:96" size="I:4">
        <type-pointer size="I:4" alignment="I:4">
          <type-tag size="I:16" alignment="I:4"><struct-ref name="gain_entry" ref="0x4060c930"/></type-tag>
        </type-pointer>
      </field>
    </struct>
    <struct name="sim_gain_noise" loc="3:/opt/tinyos-2.1.2/tos/lib/tossim/sim_gain.c" ref="0x40617db8" defined="" size="I:16" alignment="I:4">
      <field name="mean" ref="0x40616158" bit-offset="I:0" size="I:8">
        <type-float cname="double" size="I:8" alignment="I:8"></type-float>
      </field>
      <field name="range" ref="0x406161b8" bit-offset="I:64" size="I:8">
        <type-float cname="double" size="I:8" alignment="I:8"></type-float>
      </field>
    </struct>
    <attribute name="deputy_scope"  loc="NONE" ref="0x40033c28" size="V:" alignment="V:">
    </attribute>
    <struct name="timeval" loc="31:/usr/include/i386-linux-gnu/bits/time.h" ref="0x40359ec8" defined="" size="I:8" alignment="I:4">
      <field name="tv_sec" ref="0x4035e2b0" bit-offset="I:0" size="I:4">
        <type-int cname="long" size="I:4" alignment="I:4">
          <typename><typedef-ref name="__time_t" ref="0x4034b5c0"/></typename>
        </type-int>
      </field>
      <field name="tv_usec" ref="0x4035e310" bit-offset="I:32" size="I:4">
        <type-int cname="long" size="I:4" alignment="I:4">
          <typename><typedef-ref name="__suseconds_t" ref="0x4034ba98"/></typename>
        </type-int>
      </field>
    </struct>
    <attribute name="nonnull" loc="8:/usr/lib/ncc/deputy_nodeputy.h" ref="0x40034b28" defined="" size="I:4" alignment="I:4">
      <field name="dummy" ref="0x40034d80" bit-offset="I:0" size="I:4">
        <type-int cname="int" size="I:4" alignment="I:4"></type-int>
      </field>
    </attribute>
    <enum loc="82:/opt/tinyos-2.1.2/tos/chips/atm128/timer/Atm128Timer.h" ref="0x417a13b8" defined="" size="I:4" alignment="I:4">
      <type-int cname="int" size="I:4" alignment="I:4"></type-int>
    </enum>
    <attribute name="number"  loc="NONE" ref="0x40030cf0" size="V:" alignment="V:">
    </attribute>
    <enum loc="75:/opt/tinyos-2.1.2/tos/chips/atm128/timer/Atm128Timer.h" ref="0x417a2bb0" defined="" size="I:4" alignment="I:4">
      <type-int cname="int" size="I:4" alignment="I:4"></type-int>
    </enum>
    <struct name="node" loc="62:/opt/tinyos-2.1.2/tos/lib/tossim/heap.c" ref="0x405874f8" defined="" size="I:12" alignment="I:4">
      <field name="data" ref="0x40587848" bit-offset="I:0" size="I:4">
        <type-pointer size="I:4" alignment="I:4">
          <type-void size="I:1" alignment="I:1"></type-void>
        </type-pointer>
      </field>
      <field name="key" ref="0x405878a8" bit-offset="I:32" size="I:8">
        <type-int cname="long long" size="I:8" alignment="I:8"></type-int>
      </field>
    </struct>
    <nx_struct name="serial_packet" loc="131:/opt/tinyos-2.1.2/tos/lib/serial/Serial.h" ref="0x406f4558" defined="" size="I:7" alignment="I:1">
      <field name="header" ref="0x406f49e0" bit-offset="I:0" size="I:7">
        <type-tag size="I:7" alignment="I:1"><nx_struct-ref name="serial_header" ref="0x406f68c0"/>
          <typename><typedef-ref name="serial_header_t" ref="0x406f4350"/></typename>
        </type-tag>
      </field>
      <field name="data" ref="0x406f4a40" bit-offset="I:56" size="I:0">
        <type-array elements="I:0" size="I:0" alignment="I:1">
          <type-int cname="unsigned char" unsigned="" size="I:1" alignment="I:1" network="nx_uint8_t">
            <typename><typedef-ref name="nx_uint8_t" ref="0x40301728"/></typename>
          </type-int>
        </type-array>
      </field>
    </nx_struct>
    <enum loc="48:/usr/include/ctype.h" ref="0x404ad988" defined="" size="I:4" alignment="I:4">
      <type-int cname="int" size="I:4" alignment="I:4"></type-int>
    </enum>
    <enum loc="102:/opt/tinyos-2.1.2/tos/lib/serial/Serial.h" ref="0x406e4470" defined="" size="I:4" alignment="I:4">
      <type-int cname="int" size="I:4" alignment="I:4"></type-int>
    </enum>
    <attribute name="integer"  loc="NONE" ref="0x40030b88" size="V:" alignment="V:">
    </attribute>
    <union loc="75:/usr/include/i386-linux-gnu/bits/pthreadtypes.h" ref="0x4036a508" defined="" size="I:4" alignment="I:4">
      <field name="__size" ref="0x4036a618" bit-offset="I:0" size="I:4">
        <type-array elements="I:4" size="I:4" alignment="I:1">
          <type-int cname="char" size="I:1" alignment="I:1"></type-int>
        </type-array>
      </field>
      <field name="__align" ref="0x4036a678" bit-offset="I:0" size="I:4">
        <type-int cname="long" size="I:4" alignment="I:4"></type-int>
      </field>
    </union>
    <attribute name="exactlyonce" loc="99:/opt/tinyos-2.1.2/tos/lib/tossim/tos.h" ref="0x40540410" defined="" size="I:0" alignment="I:1">
    </attribute>
    <union name="message_footer" loc="55:/opt/tinyos-2.1.2/tos/lib/tossim/platform_message.h" ref="0x406f3bd8" defined="" size="I:2" alignment="I:1">
      <field name="tossim" ref="0x406f3f18" bit-offset="I:0" size="I:2">
        <type-tag size="I:2" alignment="I:1"><nx_struct-ref name="tossim_footer" ref="0x406e7d80"/>
          <typename><typedef-ref name="tossim_footer_t" ref="0x406e61d0"/></typename>
        </type-tag>
      </field>
    </union>
    <enum loc="43:/opt/tinyos-2.1.2/tos/types/Leds.h" ref="0x409da010" defined="" size="I:4" alignment="I:4">
      <type-int cname="int" size="I:4" alignment="I:4"></type-int>
    </enum>
    <union name="message_metadata" loc="59:/opt/tinyos-2.1.2/tos/lib/tossim/platform_message.h" ref="0x406f2238" defined="" size="I:4" alignment="I:1">
      <field name="tossim" ref="0x406f25a0" bit-offset="I:0" size="I:4">
        <type-tag size="I:4" alignment="I:1"><nx_struct-ref name="tossim_metadata" ref="0x406e63e8"/>
          <typename><typedef-ref name="tossim_metadata_t" ref="0x406e6af0"/></typename>
        </type-tag>
      </field>
    </union>
    <attribute name="combine"  loc="NONE" ref="0x40033890" size="V:" alignment="V:">
      <field name="fn" ref="0x400339a0" bit-offset="U:" bit-size="U:">
        <type-pointer size="I:4" alignment="I:4">
          <type-int cname="char" size="I:1" alignment="I:1"></type-int>
        </type-pointer>
      </field>
    </attribute>
    <struct name="drand48_data" loc="418:/usr/include/stdlib.h" ref="0x4037e010" defined="" size="I:24" alignment="I:4">
      <field name="__x" ref="0x4037e7c8" bit-offset="I:0" size="I:6">
        <type-array elements="I:3" size="I:6" alignment="I:2">
          <type-int cname="unsigned short" unsigned="" size="I:2" alignment="I:2"></type-int>
        </type-array>
      </field>
      <field name="__old_x" ref="0x4037e828" bit-offset="I:48" size="I:6">
        <type-array elements="I:3" size="I:6" alignment="I:2">
          <type-int cname="unsigned short" unsigned="" size="I:2" alignment="I:2"></type-int>
        </type-array>
      </field>
      <field name="__c" ref="0x4037e888" bit-offset="I:96" size="I:2">
        <type-int cname="unsigned short" unsigned="" size="I:2" alignment="I:2"></type-int>
      </field>
      <field name="__init" ref="0x4037e8e8" bit-offset="I:112" size="I:2">
        <type-int cname="unsigned short" unsigned="" size="I:2" alignment="I:2"></type-int>
      </field>
      <field name="__a" ref="0x4037e948" bit-offset="I:128" size="I:8">
        <type-int cname="unsigned long long" unsigned="" size="I:8" alignment="I:8"></type-int>
      </field>
    </struct>
    <union loc="98:/opt/tinyos-2.1.2/tos/chips/atm128/timer/Atm128Timer.h" ref="0x4179f5b0" defined="" size="I:1" alignment="I:1">
      <field name="flat" ref="0x4179f6c0" bit-offset="I:0" size="I:1">
        <type-int cname="unsigned char" unsigned="" size="I:1" alignment="I:1">
          <typename><typedef-ref name="uint8_t" ref="0x40218250"/></typename>
        </type-int>
      </field>
      <field name="bits" ref="0x4179f720" bit-offset="I:0" size="I:1">
        <type-tag size="I:1" alignment="I:1"><struct-ref ref="0x4179f140"/></type-tag>
      </field>
    </union>
    <struct name="__locale_struct" loc="28:/usr/include/xlocale.h" ref="0x40312838" defined="" size="I:116" alignment="I:4">
      <field name="__locales" ref="0x403113f8" bit-offset="I:0" size="I:52">
        <type-array elements="I:13" size="I:52" alignment="I:4">
          <type-pointer size="I:4" alignment="I:4">
            <type-tag size="V:" alignment="V:"><struct-ref name="__locale_data" ref="0x403129d0"/></type-tag>
          </type-pointer>
        </type-array>
      </field>
      <field name="__ctype_b" ref="0x40311458" bit-offset="I:416" size="I:4">
        <type-pointer size="I:4" alignment="I:4">
          <type-qualified const="">
            <type-int cname="unsigned short" unsigned="" size="I:2" alignment="I:2"></type-int>
          </type-qualified>
        </type-pointer>
      </field>
      <field name="__ctype_tolower" ref="0x403114b8" bit-offset="I:448" size="I:4">
        <type-pointer size="I:4" alignment="I:4">
          <type-qualified const="">
            <type-int cname="int" size="I:4" alignment="I:4"></type-int>
          </type-qualified>
        </type-pointer>
      </field>
      <field name="__ctype_toupper" ref="0x40311518" bit-offset="I:480" size="I:4">
        <type-pointer size="I:4" alignment="I:4">
          <type-qualified const="">
            <type-int cname="int" size="I:4" alignment="I:4"></type-int>
          </type-qualified>
        </type-pointer>
      </field>
      <field name="__names" ref="0x40311578" bit-offset="I:512" size="I:52">
        <type-array elements="I:13" size="I:52" alignment="I:4">
          <type-pointer size="I:4" alignment="I:4">
            <type-qualified const="">
              <type-int cname="char" size="I:1" alignment="I:1"></type-int>
            </type-qualified>
          </type-pointer>
        </type-array>
      </field>
    </struct>
    <struct loc="315:/opt/tinyos-2.1.2/tos/chips/atm128/timer/Atm128Timer.h" ref="0x40a38e08" defined="" size="I:1" alignment="I:1">
      <field name="ocf1c" ref="0x40a38f18" bit-offset="I:0" bit-size="I:1">
        <type-int cname="unsigned char" unsigned="" size="I:1" alignment="I:1">
          <typename><typedef-ref name="uint8_t" ref="0x40218250"/></typename>
        </type-int>
      </field>
      <field name="ocf3c" ref="0x40a38f78" bit-offset="I:1" bit-size="I:1">
        <type-int cname="unsigned char" unsigned="" size="I:1" alignment="I:1">
          <typename><typedef-ref name="uint8_t" ref="0x40218250"/></typename>
        </type-int>
      </field>
      <field name="tov3" ref="0x40a37010" bit-offset="I:2" bit-size="I:1">
        <type-int cname="unsigned char" unsigned="" size="I:1" alignment="I:1">
          <typename><typedef-ref name="uint8_t" ref="0x40218250"/></typename>
        </type-int>
      </field>
      <field name="ocf3b" ref="0x40a37070" bit-offset="I:3" bit-size="I:1">
        <type-int cname="unsigned char" unsigned="" size="I:1" alignment="I:1">
          <typename><typedef-ref name="uint8_t" ref="0x40218250"/></typename>
        </type-int>
      </field>
      <field name="ocf3a" ref="0x40a370d0" bit-offset="I:4" bit-size="I:1">
        <type-int cname="unsigned char" unsigned="" size="I:1" alignment="I:1">
          <typename><typedef-ref name="uint8_t" ref="0x40218250"/></typename>
        </type-int>
      </field>
      <field name="icf3" ref="0x40a37130" bit-offset="I:5" bit-size="I:1">
        <type-int cname="unsigned char" unsigned="" size="I:1" alignment="I:1">
          <typename><typedef-ref name="uint8_t" ref="0x40218250"/></typename>
        </type-int>
      </field>
      <field name="rsvd" ref="0x40a37190" bit-offset="I:6" bit-size="I:2">
        <type-int cname="unsigned char" unsigned="" size="I:1" alignment="I:1">
          <typename><typedef-ref name="uint8_t" ref="0x40218250"/></typename>
        </type-int>
      </field>
    </struct>
    <union loc="120:/opt/tinyos-2.1.2/tos/chips/atm128/timer/Atm128Timer.h" ref="0x4179c9c0" defined="" size="I:1" alignment="I:1">
      <field name="flat" ref="0x4179cad0" bit-offset="I:0" size="I:1">
        <type-int cname="unsigned char" unsigned="" size="I:1" alignment="I:1">
          <typename><typedef-ref name="uint8_t" ref="0x40218250"/></typename>
        </type-int>
      </field>
      <field name="bits" ref="0x4179cb30" bit-offset="I:0" size="I:1">
        <type-tag size="I:1" alignment="I:1"><struct-ref ref="0x4179c5a0"/></type-tag>
      </field>
    </union>
    <nx_struct name="serial_header" loc="123:/opt/tinyos-2.1.2/tos/lib/serial/Serial.h" ref="0x406f68c0" defined="" size="I:7" alignment="I:1">
      <field name="dest" ref="0x406f4118" bit-offset="I:0" size="I:2">
        <type-int cname="unsigned short" unsigned="" size="I:2" alignment="I:1" network="nx_uint16_t">
          <typename><typedef-ref name="nx_am_addr_t" ref="0x406eaf18"/></typename>
        </type-int>
      </field>
      <field name="src" ref="0x406f4178" bit-offset="I:16" size="I:2">
        <type-int cname="unsigned short" unsigned="" size="I:2" alignment="I:1" network="nx_uint16_t">
          <typename><typedef-ref name="nx_am_addr_t" ref="0x406eaf18"/></typename>
        </type-int>
      </field>
      <field name="length" ref="0x406f41d8" bit-offset="I:32" size="I:1">
        <type-int cname="unsigned char" unsigned="" size="I:1" alignment="I:1" network="nx_uint8_t">
          <typename><typedef-ref name="nx_uint8_t" ref="0x40301728"/></typename>
        </type-int>
      </field>
      <field name="group" ref="0x406f4238" bit-offset="I:40" size="I:1">
        <type-int cname="unsigned char" unsigned="" size="I:1" alignment="I:1" network="nx_uint8_t">
          <typename><typedef-ref name="nx_am_group_t" ref="0x406eac80"/></typename>
        </type-int>
      </field>
      <field name="type" ref="0x406f4298" bit-offset="I:48" size="I:1">
        <type-int cname="unsigned char" unsigned="" size="I:1" alignment="I:1" network="nx_uint8_t">
          <typename><typedef-ref name="nx_am_id_t" ref="0x406ea8e0"/></typename>
        </type-int>
      </field>
    </nx_struct>
    <struct loc="85:/usr/include/i386-linux-gnu/bits/waitstatus.h" ref="0x40333cd0" defined="" size="I:4" alignment="I:4">
      <field name="__w_stopval" ref="0x40333de0" bit-offset="I:0" bit-size="I:8">
        <type-int cname="unsigned int" unsigned="" size="I:4" alignment="I:4"></type-int>
      </field>
      <field name="__w_stopsig" ref="0x40333e40" bit-offset="I:8" bit-size="I:8">
        <type-int cname="unsigned int" unsigned="" size="I:4" alignment="I:4"></type-int>
      </field>
    </struct>
    <union name="message_header" loc="50:/opt/tinyos-2.1.2/tos/lib/tossim/platform_message.h" ref="0x406f33f8" defined="" size="I:7" alignment="I:1">
      <field name="tossim" ref="0x406f38b0" bit-offset="I:0" size="I:7">
        <type-tag size="I:7" alignment="I:1"><nx_struct-ref name="tossim_header" ref="0x406e7118"/>
          <typename><typedef-ref name="tossim_header_t" ref="0x406e7b78"/></typename>
        </type-tag>
      </field>
      <field name="serial" ref="0x406f3910" bit-offset="I:0" size="I:7">
        <type-tag size="I:7" alignment="I:1"><nx_struct-ref name="serial_header" ref="0x406f68c0"/>
          <typename><typedef-ref name="serial_header_t" ref="0x406f4350"/></typename>
        </type-tag>
      </field>
    </union>
    <struct name="timespec" loc="120:/usr/include/time.h" ref="0x40359980" defined="" size="I:8" alignment="I:4">
      <field name="tv_sec" ref="0x40359ce0" bit-offset="I:0" size="I:4">
        <type-int cname="long" size="I:4" alignment="I:4">
          <typename><typedef-ref name="__time_t" ref="0x4034b5c0"/></typename>
        </type-int>
      </field>
      <field name="tv_nsec" ref="0x40359d40" bit-offset="I:32" size="I:4">
        <type-int cname="long" size="I:4" alignment="I:4"></type-int>
      </field>
    </struct>
    <attribute name="count" loc="11:/usr/lib/ncc/deputy_nodeputy.h" ref="0x4020fd88" defined="" size="I:4" alignment="I:4">
      <field name="n" ref="0x4020ff38" bit-offset="I:0" size="I:4">
        <type-int cname="int" size="I:4" alignment="I:4"></type-int>
      </field>
    </attribute>
    <attribute name="bnd_nok" loc="10:/usr/lib/ncc/deputy_nodeputy.h" ref="0x4020f748" defined="" size="I:8" alignment="I:4">
      <field name="lo" ref="0x4020f9a8" bit-offset="I:0" size="I:4">
        <type-pointer size="I:4" alignment="I:4">
          <type-void size="I:1" alignment="I:1"></type-void>
        </type-pointer>
      </field>
      <field name="hi" ref="0x4020fa08" bit-offset="I:32" size="I:4">
        <type-pointer size="I:4" alignment="I:4">
          <type-void size="I:1" alignment="I:1"></type-void>
        </type-pointer>
      </field>
    </attribute>
    <union loc="65:/usr/include/i386-linux-gnu/bits/pthreadtypes.h" ref="0x40365470" defined="" size="I:4" alignment="I:4">
      <field name="__spins" ref="0x40365580" bit-offset="I:0" size="I:4">
        <type-int cname="int" size="I:4" alignment="I:4"></type-int>
      </field>
      <field name="__list" ref="0x403655e0" bit-offset="I:0" size="I:4">
        <type-tag size="I:4" alignment="I:4"><struct-ref name="__pthread_internal_slist" ref="0x403664f0"/>
          <typename><typedef-ref name="__pthread_slist_t" ref="0x403669a0"/></typename>
        </type-tag>
      </field>
    </union>
    <struct name="timezone" loc="57:/usr/include/i386-linux-gnu/sys/time.h" ref="0x405be458" defined="" size="I:8" alignment="I:4">
      <field name="tz_minuteswest" ref="0x405be7b0" bit-offset="I:0" size="I:4">
        <type-int cname="int" size="I:4" alignment="I:4"></type-int>
      </field>
      <field name="tz_dsttime" ref="0x405be810" bit-offset="I:32" size="I:4">
        <type-int cname="int" size="I:4" alignment="I:4"></type-int>
      </field>
    </struct>
    <enum loc="76:/opt/tinyos-2.1.2/tos/lib/tossim/tos.h" ref="0x40521890" defined="" size="I:4" alignment="I:4">
      <type-int cname="int" size="I:4" alignment="I:4"></type-int>
    </enum>
    <enum loc="51:/opt/tinyos-2.1.2/tos/lib/tossim/sim_noise.h" ref="0x405c3358" defined="" size="I:4" alignment="I:4">
      <type-int cname="int" size="I:4" alignment="I:4"></type-int>
    </enum>
    <union name="wait" loc="67:/usr/include/i386-linux-gnu/bits/waitstatus.h" ref="0x4032fb78" defined="" size="I:4" alignment="I:4">
      <field name="w_status" ref="0x40332010" bit-offset="I:0" size="I:4">
        <type-int cname="int" size="I:4" alignment="I:4"></type-int>
      </field>
      <field name="__wait_terminated" ref="0x40332070" bit-offset="I:0" size="I:4">
        <type-tag size="I:4" alignment="I:4"><struct-ref ref="0x40333480"/></type-tag>
      </field>
      <field name="__wait_stopped" ref="0x403320d0" bit-offset="I:0" size="I:4">
        <type-tag size="I:4" alignment="I:4"><struct-ref ref="0x40333cd0"/></type-tag>
      </field>
    </union>
    <union loc="297:/opt/tinyos-2.1.2/tos/chips/atm128/timer/Atm128Timer.h" ref="0x40a3ad70" defined="" size="I:1" alignment="I:1">
      <field name="flat" ref="0x40a3ae80" bit-offset="I:0" size="I:1">
        <type-int cname="unsigned char" unsigned="" size="I:1" alignment="I:1">
          <typename><typedef-ref name="uint8_t" ref="0x40218250"/></typename>
        </type-int>
      </field>
      <field name="bits" ref="0x40a3aee0" bit-offset="I:0" size="I:1">
        <type-tag size="I:1" alignment="I:1"><struct-ref ref="0x40a3a878"/></type-tag>
      </field>
    </union>
    <union loc="312:/opt/tinyos-2.1.2/tos/chips/atm128/timer/Atm128Timer.h" ref="0x40a37330" defined="" size="I:1" alignment="I:1">
      <field name="flat" ref="0x40a37440" bit-offset="I:0" size="I:1">
        <type-int cname="unsigned char" unsigned="" size="I:1" alignment="I:1">
          <typename><typedef-ref name="uint8_t" ref="0x40218250"/></typename>
        </type-int>
      </field>
      <field name="bits" ref="0x40a374a0" bit-offset="I:0" size="I:1">
        <type-tag size="I:1" alignment="I:1"><struct-ref ref="0x40a38e08"/></type-tag>
      </field>
    </union>
    <struct name="sim_event" loc="53:/opt/tinyos-2.1.2/tos/lib/tossim/sim_event_queue.h" ref="0x40527060" defined="" size="I:28" alignment="I:4">
      <field name="time" ref="0x40534328" bit-offset="I:0" size="I:8">
        <type-int cname="long long" size="I:8" alignment="I:8">
          <typename><typedef-ref name="sim_time_t" ref="0x40520110"/></typename>
        </type-int>
      </field>
      <field name="mote" ref="0x40534388" bit-offset="I:64" size="I:4">
        <type-int cname="unsigned long" unsigned="" size="I:4" alignment="I:4"></type-int>
      </field>
      <field name="force" ref="0x405343e8" bit-offset="I:96" size="I:1">
        <type-int cname="unsigned char" unsigned="" size="I:1" alignment="I:1">
          <typename><typedef-ref name="bool" ref="0x40521710"/></typename>
        </type-int>
      </field>
      <field name="cancelled" ref="0x40534448" bit-offset="I:104" size="I:1">
        <type-int cname="unsigned char" unsigned="" size="I:1" alignment="I:1">
          <typename><typedef-ref name="bool" ref="0x40521710"/></typename>
        </type-int>
      </field>
      <field name="data" ref="0x405344a8" bit-offset="I:128" size="I:4">
        <type-pointer size="I:4" alignment="I:4">
          <type-void size="I:1" alignment="I:1"></type-void>
        </type-pointer>
      </field>
      <field name="handle" ref="0x40534508" bit-offset="I:160" size="I:4">
        <type-pointer size="I:4" alignment="I:4">
          <type-function size="I:1" alignment="I:1">
            <type-void size="I:1" alignment="I:1"></type-void>
            <function-parameters>
              <type-pointer size="I:4" alignment="I:4">
                <type-tag size="I:28" alignment="I:4"><struct-ref name="sim_event" ref="0x40527060"/>
                  <typename><typedef-ref name="sim_event_t" ref="0x405272c8"/></typename>
                </type-tag>
              </type-pointer>
            </function-parameters>
          </type-function>
        </type-pointer>
      </field>
      <field name="cleanup" ref="0x40534578" bit-offset="I:192" size="I:4">
        <type-pointer size="I:4" alignment="I:4">
          <type-function size="I:1" alignment="I:1">
            <type-void size="I:1" alignment="I:1"></type-void>
            <function-parameters>
              <type-pointer size="I:4" alignment="I:4">
                <type-tag size="I:28" alignment="I:4"><struct-ref name="sim_event" ref="0x40527060"/>
                  <typename><typedef-ref name="sim_event_t" ref="0x405272c8"/></typename>
                </type-tag>
              </type-pointer>
            </function-parameters>
          </type-function>
        </type-pointer>
      </field>
    </struct>
    <struct name="_IO_jump_t" ref="0x404c9ad0" size="V:" alignment="V:">
    </struct>
    <struct loc="98:/usr/include/stdlib.h" ref="0x40332ba0" defined="" size="I:8" alignment="I:4">
      <field name="quot" ref="0x40332cb0" bit-offset="I:0" size="I:4">
        <type-int cname="int" size="I:4" alignment="I:4"></type-int>
      </field>
      <field name="rem" ref="0x40332d10" bit-offset="I:32" size="I:4">
        <type-int cname="int" size="I:4" alignment="I:4"></type-int>
      </field>
    </struct>
    <union loc="162:/usr/include/i386-linux-gnu/bits/pthreadtypes.h" ref="0x4036fbe8" defined="" size="I:4" alignment="I:4">
      <field name="__size" ref="0x4036fcf8" bit-offset="I:0" size="I:4">
        <type-array elements="I:4" size="I:4" alignment="I:1">
          <type-int cname="char" size="I:1" alignment="I:1"></type-int>
        </type-array>
      </field>
      <field name="__align" ref="0x4036fd58" bit-offset="I:0" size="I:4">
        <type-int cname="int" size="I:4" alignment="I:4"></type-int>
      </field>
    </union>
    <enum loc="43:/opt/tinyos-2.1.2/tos/chips/atm128/adc/Atm128Adc.h" ref="0x40797ec8" defined="" size="I:4" alignment="I:4">
      <type-int cname="int" size="I:4" alignment="I:4"></type-int>
    </enum>
    <struct loc="94:/opt/tinyos-2.1.2/tos/chips/atm128/adc/Atm128Adc.h" ref="0x40790258" defined="" size="I:1" alignment="I:1">
      <field name="mux" ref="0x40790368" bit-offset="I:0" bit-size="I:5">
        <type-int cname="unsigned char" unsigned="" size="I:1" alignment="I:1">
          <typename><typedef-ref name="uint8_t" ref="0x40218250"/></typename>
        </type-int>
      </field>
      <field name="adlar" ref="0x407903c8" bit-offset="I:5" bit-size="I:1">
        <type-int cname="unsigned char" unsigned="" size="I:1" alignment="I:1">
          <typename><typedef-ref name="uint8_t" ref="0x40218250"/></typename>
        </type-int>
      </field>
      <field name="refs" ref="0x40790428" bit-offset="I:6" bit-size="I:2">
        <type-int cname="unsigned char" unsigned="" size="I:1" alignment="I:1">
          <typename><typedef-ref name="uint8_t" ref="0x40218250"/></typename>
        </type-int>
      </field>
    </struct>
    <nx_struct name="tossim_footer" loc="14:/opt/tinyos-2.1.2/tos/lib/tossim/TossimRadioMsg.h" ref="0x406e7d80" defined="" size="I:2" alignment="I:1">
      <field name="crc" ref="0x406e6118" bit-offset="I:0" size="I:2">
        <type-int cname="unsigned short" unsigned="" size="I:2" alignment="I:1" network="nxle_uint16_t">
          <typename><typedef-ref name="nxle_uint16_t" ref="0x40302018"/></typename>
        </type-int>
      </field>
    </nx_struct>
    <enum name="__codecvt_result" loc="208:/usr/include/libio.h" ref="0x404d26f8" defined="" size="I:4" alignment="I:4">
      <type-int cname="int" size="I:4" alignment="I:4"></type-int>
    </enum>
    <struct name="sim_packet" loc="59:/opt/tinyos-2.1.2/tos/lib/tossim/sim_packet.h" ref="0x406de3f8" defined="" size="I:0" alignment="I:1">
    </struct>
    <nx_struct name="NetworkMsg" loc="12:Network.h" ref="0x40712df0" defined="" size="I:22" alignment="I:1">
      <field name="nodeid" ref="0x40737cc8" bit-offset="I:0" size="I:2">
        <type-int cname="unsigned short" unsigned="" size="I:2" alignment="I:1" network="nx_uint16_t">
          <typename><typedef-ref name="nx_uint16_t" ref="0x40301ba0"/></typename>
        </type-int>
      </field>
      <field name="sourceid" ref="0x40737d28" bit-offset="I:16" size="I:2">
        <type-int cname="unsigned short" unsigned="" size="I:2" alignment="I:1" network="nx_uint16_t">
          <typename><typedef-ref name="nx_uint16_t" ref="0x40301ba0"/></typename>
        </type-int>
      </field>
      <field name="a" ref="0x40737d88" bit-offset="I:32" size="I:2">
        <type-int cname="unsigned short" unsigned="" size="I:2" alignment="I:1" network="nx_uint16_t">
          <typename><typedef-ref name="nx_uint16_t" ref="0x40301ba0"/></typename>
        </type-int>
      </field>
      <field name="b" ref="0x40737de8" bit-offset="I:48" size="I:2">
        <type-int cname="unsigned short" unsigned="" size="I:2" alignment="I:1" network="nx_uint16_t">
          <typename><typedef-ref name="nx_uint16_t" ref="0x40301ba0"/></typename>
        </type-int>
      </field>
      <field name="n1" ref="0x40737e48" bit-offset="I:64" size="I:2">
        <type-int cname="unsigned short" unsigned="" size="I:2" alignment="I:1" network="nx_uint16_t">
          <typename><typedef-ref name="nx_uint16_t" ref="0x40301ba0"/></typename>
        </type-int>
      </field>
      <field name="n2" ref="0x40737ea8" bit-offset="I:80" size="I:2">
        <type-int cname="unsigned short" unsigned="" size="I:2" alignment="I:1" network="nx_uint16_t">
          <typename><typedef-ref name="nx_uint16_t" ref="0x40301ba0"/></typename>
        </type-int>
      </field>
      <field name="n3" ref="0x40737f08" bit-offset="I:96" size="I:2">
        <type-int cname="unsigned short" unsigned="" size="I:2" alignment="I:1" network="nx_uint16_t">
          <typename><typedef-ref name="nx_uint16_t" ref="0x40301ba0"/></typename>
        </type-int>
      </field>
      <field name="n4" ref="0x40737f68" bit-offset="I:112" size="I:2">
        <type-int cname="unsigned short" unsigned="" size="I:2" alignment="I:1" network="nx_uint16_t">
          <typename><typedef-ref name="nx_uint16_t" ref="0x40301ba0"/></typename>
        </type-int>
      </field>
      <field name="n5" ref="0x40736010" bit-offset="I:128" size="I:2">
        <type-int cname="unsigned short" unsigned="" size="I:2" alignment="I:1" network="nx_uint16_t">
          <typename><typedef-ref name="nx_uint16_t" ref="0x40301ba0"/></typename>
        </type-int>
      </field>
      <field name="n6" ref="0x40736070" bit-offset="I:144" size="I:2">
        <type-int cname="unsigned short" unsigned="" size="I:2" alignment="I:1" network="nx_uint16_t">
          <typename><typedef-ref name="nx_uint16_t" ref="0x40301ba0"/></typename>
        </type-int>
      </field>
      <field name="count" ref="0x407360d0" bit-offset="I:160" size="I:2">
        <type-int cname="unsigned short" unsigned="" size="I:2" alignment="I:1" network="nx_uint16_t">
          <typename><typedef-ref name="nx_uint16_t" ref="0x40301ba0"/></typename>
        </type-int>
      </field>
    </nx_struct>
    <struct loc="136:/opt/tinyos-2.1.2/tos/chips/atm128/timer/Atm128Timer.h" ref="0x4179bbc0" defined="" size="I:1" alignment="I:1">
      <field name="toie0" ref="0x4179bcd0" bit-offset="I:0" bit-size="I:1">
        <type-int cname="unsigned char" unsigned="" size="I:1" alignment="I:1">
          <typename><typedef-ref name="uint8_t" ref="0x40218250"/></typename>
        </type-int>
      </field>
      <field name="ocie0" ref="0x4179bd30" bit-offset="I:1" bit-size="I:1">
        <type-int cname="unsigned char" unsigned="" size="I:1" alignment="I:1">
          <typename><typedef-ref name="uint8_t" ref="0x40218250"/></typename>
        </type-int>
      </field>
      <field name="toie1" ref="0x4179bd90" bit-offset="I:2" bit-size="I:1">
        <type-int cname="unsigned char" unsigned="" size="I:1" alignment="I:1">
          <typename><typedef-ref name="uint8_t" ref="0x40218250"/></typename>
        </type-int>
      </field>
      <field name="ocie1b" ref="0x4179bdf0" bit-offset="I:3" bit-size="I:1">
        <type-int cname="unsigned char" unsigned="" size="I:1" alignment="I:1">
          <typename><typedef-ref name="uint8_t" ref="0x40218250"/></typename>
        </type-int>
      </field>
      <field name="ocie1a" ref="0x4179be50" bit-offset="I:4" bit-size="I:1">
        <type-int cname="unsigned char" unsigned="" size="I:1" alignment="I:1">
          <typename><typedef-ref name="uint8_t" ref="0x40218250"/></typename>
        </type-int>
      </field>
      <field name="ticie1" ref="0x4179beb0" bit-offset="I:5" bit-size="I:1">
        <type-int cname="unsigned char" unsigned="" size="I:1" alignment="I:1">
          <typename><typedef-ref name="uint8_t" ref="0x40218250"/></typename>
        </type-int>
      </field>
      <field name="toie2" ref="0x4179bf10" bit-offset="I:6" bit-size="I:1">
        <type-int cname="unsigned char" unsigned="" size="I:1" alignment="I:1">
          <typename><typedef-ref name="uint8_t" ref="0x40218250"/></typename>
        </type-int>
      </field>
      <field name="ocie2" ref="0x4179bf70" bit-offset="I:7" bit-size="I:1">
        <type-int cname="unsigned char" unsigned="" size="I:1" alignment="I:1">
          <typename><typedef-ref name="uint8_t" ref="0x40218250"/></typename>
        </type-int>
      </field>
    </struct>
    <union loc="156:/usr/include/i386-linux-gnu/bits/pthreadtypes.h" ref="0x4036f508" defined="" size="I:20" alignment="I:4">
      <field name="__size" ref="0x4036f618" bit-offset="I:0" size="I:20">
        <type-array elements="I:20" size="I:20" alignment="I:1">
          <type-int cname="char" size="I:1" alignment="I:1"></type-int>
        </type-array>
      </field>
      <field name="__align" ref="0x4036f678" bit-offset="I:0" size="I:4">
        <type-int cname="long" size="I:4" alignment="I:4"></type-int>
      </field>
    </union>
    <struct loc="41:/opt/tinyos-2.1.2/tos/lib/timer/Timer.h" ref="0x4020c630" defined="" size="I:4" alignment="I:4">
      <field name="notUsed" ref="0x4020c740" bit-offset="I:0" size="I:4">
        <type-int cname="int" size="I:4" alignment="I:4"></type-int>
      </field>
    </struct>
    <enum loc="58:/opt/tinyos-2.1.2/tos/chips/atm128/adc/Atm128Adc.h" ref="0x40795010" defined="" size="I:4" alignment="I:4">
      <type-int cname="int" size="I:4" alignment="I:4"></type-int>
    </enum>
    <struct loc="153:/opt/tinyos-2.1.2/tos/chips/atm128/timer/Atm128Timer.h" ref="0x417982f8" defined="" size="I:1" alignment="I:1">
      <field name="tov0" ref="0x41798408" bit-offset="I:0" bit-size="I:1">
        <type-int cname="unsigned char" unsigned="" size="I:1" alignment="I:1">
          <typename><typedef-ref name="uint8_t" ref="0x40218250"/></typename>
        </type-int>
      </field>
      <field name="ocf0" ref="0x41798468" bit-offset="I:1" bit-size="I:1">
        <type-int cname="unsigned char" unsigned="" size="I:1" alignment="I:1">
          <typename><typedef-ref name="uint8_t" ref="0x40218250"/></typename>
        </type-int>
      </field>
      <field name="tov1" ref="0x417984c8" bit-offset="I:2" bit-size="I:1">
        <type-int cname="unsigned char" unsigned="" size="I:1" alignment="I:1">
          <typename><typedef-ref name="uint8_t" ref="0x40218250"/></typename>
        </type-int>
      </field>
      <field name="ocf1b" ref="0x41798528" bit-offset="I:3" bit-size="I:1">
        <type-int cname="unsigned char" unsigned="" size="I:1" alignment="I:1">
          <typename><typedef-ref name="uint8_t" ref="0x40218250"/></typename>
        </type-int>
      </field>
      <field name="ocf1a" ref="0x41798588" bit-offset="I:4" bit-size="I:1">
        <type-int cname="unsigned char" unsigned="" size="I:1" alignment="I:1">
          <typename><typedef-ref name="uint8_t" ref="0x40218250"/></typename>
        </type-int>
      </field>
      <field name="icf1" ref="0x417985e8" bit-offset="I:5" bit-size="I:1">
        <type-int cname="unsigned char" unsigned="" size="I:1" alignment="I:1">
          <typename><typedef-ref name="uint8_t" ref="0x40218250"/></typename>
        </type-int>
      </field>
      <field name="tov2" ref="0x41798648" bit-offset="I:6" bit-size="I:1">
        <type-int cname="unsigned char" unsigned="" size="I:1" alignment="I:1">
          <typename><typedef-ref name="uint8_t" ref="0x40218250"/></typename>
        </type-int>
      </field>
      <field name="ocf2" ref="0x417986a8" bit-offset="I:7" bit-size="I:1">
        <type-int cname="unsigned char" unsigned="" size="I:1" alignment="I:1">
          <typename><typedef-ref name="uint8_t" ref="0x40218250"/></typename>
        </type-int>
      </field>
    </struct>
    <struct name="__pthread_internal_slist" loc="46:/usr/include/i386-linux-gnu/bits/pthreadtypes.h" ref="0x403664f0" defined="" size="I:4" alignment="I:4">
      <field name="__next" ref="0x403668e8" bit-offset="I:0" size="I:4">
        <type-pointer size="I:4" alignment="I:4">
          <type-tag size="I:4" alignment="I:4"><struct-ref name="__pthread_internal_slist" ref="0x403664f0"/></type-tag>
        </type-pointer>
      </field>
    </struct>
    <struct loc="150:/opt/tinyos-2.1.2/tos/chips/atm128/adc/Atm128Adc.h" ref="0x407a4580" defined="" size="I:1" alignment="I:1">
      <field name="adps" ref="0x407a4690" bit-offset="I:0" bit-size="I:3">
        <type-int cname="unsigned char" unsigned="" size="I:1" alignment="I:1">
          <typename><typedef-ref name="uint8_t" ref="0x40218250"/></typename>
        </type-int>
      </field>
      <field name="adie" ref="0x407a46f0" bit-offset="I:3" bit-size="I:1">
        <type-int cname="unsigned char" unsigned="" size="I:1" alignment="I:1">
          <typename><typedef-ref name="uint8_t" ref="0x40218250"/></typename>
        </type-int>
      </field>
      <field name="adif" ref="0x407a4750" bit-offset="I:4" bit-size="I:1">
        <type-int cname="unsigned char" unsigned="" size="I:1" alignment="I:1">
          <typename><typedef-ref name="uint8_t" ref="0x40218250"/></typename>
        </type-int>
      </field>
      <field name="adfr" ref="0x407a47b0" bit-offset="I:5" bit-size="I:1">
        <type-int cname="unsigned char" unsigned="" size="I:1" alignment="I:1">
          <typename><typedef-ref name="uint8_t" ref="0x40218250"/></typename>
        </type-int>
      </field>
      <field name="adsc" ref="0x407a4810" bit-offset="I:6" bit-size="I:1">
        <type-int cname="unsigned char" unsigned="" size="I:1" alignment="I:1">
          <typename><typedef-ref name="uint8_t" ref="0x40218250"/></typename>
        </type-int>
      </field>
      <field name="aden" ref="0x407a4870" bit-offset="I:7" bit-size="I:1">
        <type-int cname="unsigned char" unsigned="" size="I:1" alignment="I:1">
          <typename><typedef-ref name="uint8_t" ref="0x40218250"/></typename>
        </type-int>
      </field>
    </struct>
    <enum loc="63:/opt/tinyos-2.1.2/tos/lib/tossim/sim_log.c" ref="0x40546328" defined="" size="I:4" alignment="I:4">
      <type-int cname="int" size="I:4" alignment="I:4"></type-int>
    </enum>
    <union loc="86:/usr/include/wchar.h" ref="0x404cc560" defined="" size="I:4" alignment="I:4">
      <field name="__wch" ref="0x404cc670" bit-offset="I:0" size="I:4">
        <type-int cname="unsigned int" unsigned="" size="I:4" alignment="I:4"></type-int>
      </field>
      <field name="__wchb" ref="0x404cc6d0" bit-offset="I:0" size="I:4">
        <type-array elements="I:4" size="I:4" alignment="I:1">
          <type-int cname="char" size="I:1" alignment="I:1"></type-int>
        </type-array>
      </field>
    </union>
    <attribute name="atmostonce" loc="97:/opt/tinyos-2.1.2/tos/lib/tossim/tos.h" ref="0x40540010" defined="" size="I:0" alignment="I:1">
    </attribute>
    <struct loc="118:/usr/include/stdlib.h" ref="0x403367c0" defined="" size="I:16" alignment="I:4">
      <field name="quot" ref="0x403368d0" bit-offset="I:0" size="I:8">
        <type-int cname="long long" size="I:8" alignment="I:8"></type-int>
      </field>
      <field name="rem" ref="0x40336930" bit-offset="I:64" size="I:8">
        <type-int cname="long long" size="I:8" alignment="I:8"></type-int>
      </field>
    </struct>
    <enum name="__itimer_which" loc="93:/usr/include/i386-linux-gnu/sys/time.h" ref="0x405bcd20" defined="" size="I:4" alignment="I:4">
      <type-int cname="int" size="I:4" alignment="I:4"></type-int>
    </enum>
    <enum loc="203:/usr/include/math.h" ref="0x404a4070" defined="" size="I:4" alignment="I:4">
      <type-int cname="int" size="I:4" alignment="I:4"></type-int>
    </enum>
    <nx_struct name="serial_metadata" loc="136:/opt/tinyos-2.1.2/tos/lib/serial/Serial.h" ref="0x406f4d88" defined="" size="I:1" alignment="I:1">
      <field name="ack" ref="0x406f3130" bit-offset="I:0" size="I:1">
        <type-int cname="unsigned char" unsigned="" size="I:1" alignment="I:1" network="nx_uint8_t">
          <typename><typedef-ref name="nx_uint8_t" ref="0x40301728"/></typename>
        </type-int>
      </field>
    </nx_struct>
    <struct loc="42:/opt/tinyos-2.1.2/tos/lib/timer/Timer.h" ref="0x4020ca70" defined="" size="I:4" alignment="I:4">
      <field name="notUsed" ref="0x4020cb80" bit-offset="I:0" size="I:4">
        <type-int cname="int" size="I:4" alignment="I:4"></type-int>
      </field>
    </struct>
    <enum loc="25:/opt/tinyos-2.1.2/tos/chips/atm128/sim/atm128_sim.h" ref="0x40736768" defined="" size="I:4" alignment="I:4">
      <type-int cname="int" size="I:4" alignment="I:4"></type-int>
    </enum>
    <struct loc="101:/opt/tinyos-2.1.2/tos/chips/atm128/timer/Atm128Timer.h" ref="0x4179f140" defined="" size="I:1" alignment="I:1">
      <field name="cs" ref="0x4179f250" bit-offset="I:0" bit-size="I:3">
        <type-int cname="unsigned char" unsigned="" size="I:1" alignment="I:1">
          <typename><typedef-ref name="uint8_t" ref="0x40218250"/></typename>
        </type-int>
      </field>
      <field name="wgm1" ref="0x4179f2b0" bit-offset="I:3" bit-size="I:1">
        <type-int cname="unsigned char" unsigned="" size="I:1" alignment="I:1">
          <typename><typedef-ref name="uint8_t" ref="0x40218250"/></typename>
        </type-int>
      </field>
      <field name="com" ref="0x4179f310" bit-offset="I:4" bit-size="I:2">
        <type-int cname="unsigned char" unsigned="" size="I:1" alignment="I:1">
          <typename><typedef-ref name="uint8_t" ref="0x40218250"/></typename>
        </type-int>
      </field>
      <field name="wgm0" ref="0x4179f370" bit-offset="I:6" bit-size="I:1">
        <type-int cname="unsigned char" unsigned="" size="I:1" alignment="I:1">
          <typename><typedef-ref name="uint8_t" ref="0x40218250"/></typename>
        </type-int>
      </field>
      <field name="foc" ref="0x4179f3d0" bit-offset="I:7" bit-size="I:1">
        <type-int cname="unsigned char" unsigned="" size="I:1" alignment="I:1">
          <typename><typedef-ref name="uint8_t" ref="0x40218250"/></typename>
        </type-int>
      </field>
    </struct>
    <struct loc="288:/usr/include/inttypes.h" ref="0x4021f380" defined="" size="I:16" alignment="I:4">
      <field name="quot" ref="0x4021f490" bit-offset="I:0" size="I:8">
        <type-int cname="long long" size="I:8" alignment="I:8"></type-int>
      </field>
      <field name="rem" ref="0x4021f4f0" bit-offset="I:64" size="I:8">
        <type-int cname="long long" size="I:8" alignment="I:8"></type-int>
      </field>
    </struct>
    <union loc="68:/usr/include/stdlib.h" ref="0x403324e8" defined="" size="I:4" alignment="I:4">
      <field name="__uptr" ref="0x403325f8" bit-offset="I:0" size="I:4">
        <type-pointer size="I:4" alignment="I:4">
          <type-tag size="I:4" alignment="I:4"><union-ref name="wait" ref="0x4032fb78"/></type-tag>
        </type-pointer>
      </field>
      <field name="__iptr" ref="0x40332658" bit-offset="I:0" size="I:4">
        <type-pointer size="I:4" alignment="I:4">
          <type-int cname="int" size="I:4" alignment="I:4"></type-int>
        </type-pointer>
      </field>
    </union>
    <struct loc="121:/usr/include/i386-linux-gnu/bits/pthreadtypes.h" ref="0x4036c8d8" defined="" size="I:32" alignment="I:4">
      <field name="__lock" ref="0x4036c9e8" bit-offset="I:0" size="I:4">
        <type-int cname="int" size="I:4" alignment="I:4"></type-int>
      </field>
      <field name="__nr_readers" ref="0x4036ca48" bit-offset="I:32" size="I:4">
        <type-int cname="unsigned int" unsigned="" size="I:4" alignment="I:4"></type-int>
[truncated: 383,807 more chars]
