# Supplementary material for: Cluster‐Based Arithmetic Coding for Data Provenance Compression in Wireless Sensor Networks
Source: Hindawi journal article supplement (doi:10.1155/2018/9576978), 2018-01-01
Supplement: f1 [file 9576978.f1.zip › 9576978.f1/simulation code/arithmetic/log.txt]

DEBUG (1): count is 1.
DEBUG (1): **************************.
DEBUG (2): count is 1.
DEBUG (2): **************************.
DEBUG (3): count is 1.
DEBUG (3): **************************.
DEBUG (4): count is 1.
DEBUG (4): **************************.
DEBUG (5): count is 1.
DEBUG (5): **************************.
DEBUG (6): count is 1.
DEBUG (6): **************************.
DEBUG (7): count is 1.
DEBUG (7): **************************.
DEBUG (8): count is 1.
DEBUG (8): **************************.
DEBUG (9): count is 1.
DEBUG (9): **************************.
DEBUG (10): count is 1.
DEBUG (10): **************************.
DEBUG (11): count is 1.
DEBUG (11): **************************.
DEBUG (12): count is 1.
DEBUG (12): **************************.
DEBUG (13): count is 1.
DEBUG (13): **************************.
DEBUG (14): count is 1.
DEBUG (14): **************************.
DEBUG (15): count is 1.
DEBUG (15): **************************.
DEBUG (16): count is 1.
DEBUG (16): **************************.
DEBUG (17): count is 1.
DEBUG (17): **************************.
DEBUG (18): count is 1.
DEBUG (18): **************************.
DEBUG (19): count is 1.
DEBUG (19): **************************.
DEBUG (20): count is 1.
DEBUG (20): **************************.
DEBUG (21): count is 1.
DEBUG (21): **************************.
DEBUG (22): count is 1.
DEBUG (22): **************************.
DEBUG (23): count is 1.
DEBUG (23): **************************.
DEBUG (24): count is 1.
DEBUG (24): **************************.
DEBUG (25): count is 1.
DEBUG (25): **************************.
DEBUG (26): count is 1.
DEBUG (26): **************************.
DEBUG (27): count is 1.
DEBUG (27): **************************.
DEBUG (28): count is 1.
DEBUG (28): **************************.
DEBUG (29): count is 1.
DEBUG (29): **************************.
DEBUG (30): count is 1.
DEBUG (30): **************************.
DEBUG (31): count is 1.
DEBUG (31): **************************.
DEBUG (32): count is 1.
DEBUG (32): **************************.
DEBUG (33): count is 1.
DEBUG (33): **************************.
DEBUG (34): count is 1.
DEBUG (34): **************************.
DEBUG (35): count is 1.
DEBUG (35): **************************.
DEBUG (36): count is 1.
DEBUG (36): **************************.
DEBUG (37): count is 1.
DEBUG (37): **************************.
DEBUG (38): count is 1.
DEBUG (38): **************************.
DEBUG (39): count is 1.
DEBUG (39): **************************.
DEBUG (40): count is 1.
DEBUG (40): **************************.
DEBUG (41): count is 1.
DEBUG (41): **************************.
DEBUG (42): count is 1.
DEBUG (42): **************************.
DEBUG (43): count is 1.
DEBUG (43): **************************.
DEBUG (44): count is 1.
DEBUG (44): **************************.
DEBUG (45): count is 1.
DEBUG (45): **************************.
DEBUG (46): count is 1.
DEBUG (46): **************************.
DEBUG (47): count is 1.
DEBUG (47): **************************.
DEBUG (48): count is 1.
DEBUG (48): **************************.
DEBUG (49): count is 1.
DEBUG (49): **************************.
DEBUG (50): count is 1.
DEBUG (50): **************************.
DEBUG (39): packet received from 40.
DEBUG (39): r404939= 0.
DEBUG (39): r4039= 0.
DEBUG (39): r4939= 0.
DEBUG (39): s39[0]= 0.000000.
DEBUG (39): s39[1]= 1.000000.
DEBUG (39): s39[2]= 0.000000.
DEBUG (39): s39[3]= 0.428600.
DEBUG (39): ws1= 4.
DEBUG (39): ws2= 4.
DEBUG (39): temppkt1= 8.
DEBUG (39): wa1= 8470.
DEBUG (39): wb1= 9300.
DEBUG (39): wa2= 0.847000.
DEBUG (39): wb2= 0.930000.
DEBUG (39): a1= 0.
DEBUG (39): temppkt->n1= 8.
DEBUG (39): temppkt->n2= 100.
DEBUG (39): temppkt->n3= 100.
DEBUG (39): temppkt->n4= 100.
DEBUG (39): temppkt->n5= 100.
DEBUG (39): temppkt->n6= 100.
DEBUG (39): m40-39= 0.884794.
DEBUG (39): n40-39= 0.893095.
DEBUG (39): a40-39= 55508.
DEBUG (39): b40-39= 60947.
DEBUG (18): packet received from 19.
DEBUG (18): r1918= 0.
DEBUG (18): ws1= 4.
DEBUG (18): ws2= 4.
DEBUG (18): temppkt1= 9.
DEBUG (18): wa1= 7210.
DEBUG (18): wb1= 8310.
DEBUG (18): wa2= 0.721000.
DEBUG (18): wb2= 0.831000.
DEBUG (18): a1= 0.
DEBUG (18): temppkt->n1= 9.
DEBUG (18): temppkt->n2= 100.
DEBUG (18): temppkt->n3= 100.
DEBUG (18): temppkt->n4= 100.
DEBUG (18): temppkt->n5= 100.
DEBUG (18): temppkt->n6= 100.
DEBUG (18): m19-18= 0.972198.
DEBUG (18): n19-18= 0.983200.
DEBUG (18): a19-18= 47250.
DEBUG (18): b19-18= 54459.
DEBUG (5): packet received from 9.
DEBUG (5): r895= 0.
DEBUG (5): r85= 0.
DEBUG (5): r95= 0.
DEBUG (5): s5[0]= 0.409100.
DEBUG (5): s5[1]= 1.000000.
DEBUG (5): s5[2]= 0.000000.
DEBUG (5): s5[3]= 0.231900.
DEBUG (5): ws1= 4.
DEBUG (5): ws2= 4.
DEBUG (5): temppkt1= 5.
DEBUG (5): wa1= 5670.
DEBUG (5): wb1= 6600.
DEBUG (5): wa2= 0.567000.
DEBUG (5): wb2= 0.660000.
DEBUG (5): a1= 0.
DEBUG (5): temppkt->n1= 5.
DEBUG (5): temppkt->n2= 100.
DEBUG (5): temppkt->n3= 100.
DEBUG (5): temppkt->n4= 100.
DEBUG (5): temppkt->n5= 100.
DEBUG (5): temppkt->n6= 100.
DEBUG (5): m9-5= 0.556786.
DEBUG (5): n9-5= 0.566019.
DEBUG (5): a9-5= 37158.
DEBUG (5): b9-5= 43253.
DEBUG (6): packet received from 9.
DEBUG (6): r96= 0.
DEBUG (6): ws1= 4.
DEBUG (6): ws2= 4.
DEBUG (6): temppkt1= 5.
DEBUG (6): wa1= 6600.
DEBUG (6): wb1= 7980.
DEBUG (6): wa2= 0.660000.
DEBUG (6): wb2= 0.798000.
DEBUG (6): a1= 0.
DEBUG (6): temppkt->n1= 5.
DEBUG (6): temppkt->n2= 100.
DEBUG (6): temppkt->n3= 100.
DEBUG (6): temppkt->n4= 100.
DEBUG (6): temppkt->n5= 100.
DEBUG (6): temppkt->n6= 100.
DEBUG (6): m9-6= 0.566019.
DEBUG (6): n9-6= 0.579865.
DEBUG (6): a9-6= 43253.
DEBUG (6): b9-6= 52296.
DEBUG (21): packet received from 9.
DEBUG (21): r921= 0.
DEBUG (21): ws1= 4.
DEBUG (21): ws2= 4.
DEBUG (21): temppkt1= 5.
DEBUG (21): wa1= 7980.
DEBUG (21): wb1= 9650.
DEBUG (21): wa2= 0.798000.
DEBUG (21): wb2= 0.965000.
DEBUG (21): a1= 0.
DEBUG (21): temppkt->n1= 5.
DEBUG (21): temppkt->n2= 100.
DEBUG (21): temppkt->n3= 100.
DEBUG (21): temppkt->n4= 100.
DEBUG (21): temppkt->n5= 100.
DEBUG (21): temppkt->n6= 100.
DEBUG (21): m9-21= 0.579865.
DEBUG (21): n9-21= 0.596597.
DEBUG (21): a9-21= 52296.
DEBUG (21): b9-21= 63241.
DEBUG (50): packet received from 1.
DEBUG (50): sourceid= 1.
DEBUG (50): r1250= 0.
DEBUG (50): r150= 0.
DEBUG (50): r250= 0.
DEBUG (50): s50[0]= 0.000000.
DEBUG (50): s50[1]= 1.000000.
DEBUG (50): s50[2]= 0.000000.
DEBUG (50): s50[3]= 1.000000.
DEBUG (50): a1= 0.
DEBUG (50): b1= 6409.
DEBUG (50): btrpkt->n1= 100.
DEBUG (50): btrpkt->n2= 100.
DEBUG (50): btrpkt->n3= 100.
DEBUG (50): btrpkt->n4= 100.
DEBUG (50): btrpkt->n5= 100.
DEBUG (50): btrpkt->n6= 100.
DEBUG (50): ws1= 0.
DEBUG (50): ws2= 3.
DEBUG (50): wa2= 0.000000.
DEBUG (50): wb2= 0.097700.
DEBUG (50): btrpkt->n1= 100.
DEBUG (50): btrpkt->n2= 100.
DEBUG (50): btrpkt->n3= 100.
DEBUG (50): btrpkt->n4= 100.
DEBUG (50): btrpkt->n5= 100.
DEBUG (50): btrpkt->n6= 100.
DEBUG (50): m= 0.000000.
DEBUG (50): n= 0.097795.
DEBUG (50): a2= 0.
DEBUG (50): b2= 6402.
DEBUG (33): packet received from 34.
DEBUG (33): r3433= 0.
DEBUG (33): ws1= 4.
DEBUG (33): ws2= 4.
DEBUG (33): wa2= 0.779500.
DEBUG (33): wb2= 0.804400.
DEBUG (33): temppkt->n1= 100.
DEBUG (33): temppkt->n2= 100.
DEBUG (33): temppkt->n3= 100.
DEBUG (33): temppkt->n4= 100.
DEBUG (33): temppkt->n5= 100.
DEBUG (33): temppkt->n6= 100.
DEBUG (33): m34-33= 0.779599.
DEBUG (33): n34-33= 0.804486.
DEBUG (33): a34-33= 51084.
DEBUG (33): b34-33= 52716.
DEBUG (25): packet received from 26.
DEBUG (25): r2625= 0.
DEBUG (25): ws1= 4.
DEBUG (25): ws2= 4.
DEBUG (25): temppkt1= 6.
DEBUG (25): wa1= 5440.
DEBUG (25): wb1= 8260.
DEBUG (25): wa2= 0.544000.
DEBUG (25): wb2= 0.826000.
DEBUG (25): a1= 0.
DEBUG (25): temppkt->n1= 6.
DEBUG (25): temppkt->n2= 100.
DEBUG (25): temppkt->n3= 100.
DEBUG (25): temppkt->n4= 100.
DEBUG (25): temppkt->n5= 100.
DEBUG (25): temppkt->n6= 100.
DEBUG (25): m26-25= 0.654490.
DEBUG (25): n26-25= 0.682689.
DEBUG (25): a26-25= 35651.
DEBUG (25): b26-25= 54131.
DEBUG (30): packet received from 31.
DEBUG (30): r314130= 0.
DEBUG (30): r3130= 0.
DEBUG (30): r4130= 0.
DEBUG (30): s30[0]= 0.000000.
DEBUG (30): s30[1]= 0.400000.
DEBUG (30): s30[2]= 0.000000.
DEBUG (30): s30[3]= 0.473700.
DEBUG (30): ws1= 4.
DEBUG (30): ws2= 4.
DEBUG (30): temppkt1= 7.
DEBUG (30): wa1= 4390.
DEBUG (30): wb1= 4660.
DEBUG (30): temppkt2= 4.
DEBUG (30): wa1= 3900.
DEBUG (30): wb1= 6600.
DEBUG (30): wa2= 0.390000.
DEBUG (30): wb2= 0.660000.
DEBUG (30): temppkt->n1= 7.
DEBUG (30): temppkt->n2= 4.
DEBUG (30): temppkt->n3= 100.
DEBUG (30): temppkt->n4= 100.
DEBUG (30): temppkt->n5= 100.
DEBUG (30): temppkt->n6= 100.
DEBUG (30): m31-30= 0.743999.
DEBUG (30): n31-30= 0.746636.
DEBUG (30): a31-30= 25558.
DEBUG (30): b31-30= 43253.
DEBUG (44): packet received from 45.
DEBUG (44): r4544= 0.
DEBUG (44): ws1= 4.
DEBUG (44): ws2= 4.
DEBUG (44): temppkt1= 9.
DEBUG (44): wa1= 4770.
DEBUG (44): wb1= 6100.
DEBUG (44): wa2= 0.477000.
DEBUG (44): wb2= 0.610000.
DEBUG (44): a1= 0.
DEBUG (44): temppkt->n1= 9.
DEBUG (44): temppkt->n2= 100.
DEBUG (44): temppkt->n3= 100.
DEBUG (44): temppkt->n4= 100.
DEBUG (44): temppkt->n5= 100.
DEBUG (44): temppkt->n6= 100.
DEBUG (44): m45-44= 0.947799.
DEBUG (44): n45-44= 0.961089.
DEBUG (44): a45-44= 31260.
DEBUG (44): b45-44= 39976.
DEBUG (3): packet received from 7.
DEBUG (3): r73= 0.
DEBUG (3): ws1= 4.
DEBUG (3): ws2= 4.
DEBUG (3): temppkt1= 4.
DEBUG (3): wa1= 2410.
DEBUG (3): wb1= 7230.
DEBUG (3): wa2= 0.241000.
DEBUG (3): wb2= 0.723000.
DEBUG (3): a1= 0.
DEBUG (3): temppkt->n1= 4.
DEBUG (3): temppkt->n2= 100.
DEBUG (3): temppkt->n3= 100.
DEBUG (3): temppkt->n4= 100.
DEBUG (3): temppkt->n5= 100.
DEBUG (3): temppkt->n6= 100.
DEBUG (3): m7-3= 0.424186.
DEBUG (3): n7-3= 0.472335.
DEBUG (3): a7-3= 15793.
DEBUG (3): b7-3= 47381.
DEBUG (26): packet received from 37.
DEBUG (26): r273726= 0.
DEBUG (26): r2726= 0.
DEBUG (26): r3726= 0.
DEBUG (26): s26[0]= 0.545500.
DEBUG (26): s26[1]= 1.000000.
DEBUG (26): s26[2]= 0.000000.
DEBUG (26): s26[3]= 0.513500.
DEBUG (26): ws1= 4.
DEBUG (26): ws2= 4.
DEBUG (26): temppkt1= 8.
DEBUG (26): wa1= 4500.
DEBUG (26): wb1= 5310.
DEBUG (26): wa2= 0.450000.
DEBUG (26): wb2= 0.531000.
DEBUG (26): a1= 0.
DEBUG (26): temppkt->n1= 8.
DEBUG (26): temppkt->n2= 100.
DEBUG (26): temppkt->n3= 100.
DEBUG (26): temppkt->n4= 100.
DEBUG (26): temppkt->n5= 100.
DEBUG (26): temppkt->n6= 100.
DEBUG (26): m37-26= 0.845090.
DEBUG (26): n37-26= 0.853153.
DEBUG (26): a37-26= 29490.
DEBUG (26): b37-26= 34799.
DEBUG (28): packet received from 29.
DEBUG (28): r293928= 0.
DEBUG (28): r2928= 0.
DEBUG (28): r3928= 0.
DEBUG (28): s28[0]= 0.541700.
DEBUG (28): s28[1]= 1.000000.
DEBUG (28): s28[2]= 0.000000.
DEBUG (28): s28[3]= 0.464300.
DEBUG (28): ws1= 4.
DEBUG (28): ws2= 4.
DEBUG (28): temppkt1= 7.
DEBUG (28): wa1= 2370.
DEBUG (28): wb1= 2900.
DEBUG (28): temppkt2= 2.
DEBUG (28): wa1= 3700.
DEBUG (28): wb1= 9000.
DEBUG (28): wa2= 0.370000.
DEBUG (28): wb2= 0.900000.
DEBUG (28): temppkt->n1= 7.
DEBUG (28): temppkt->n2= 2.
DEBUG (28): temppkt->n3= 100.
DEBUG (28): temppkt->n4= 100.
DEBUG (28): temppkt->n5= 100.
DEBUG (28): temppkt->n6= 100.
DEBUG (28): m29-28= 0.723777.
DEBUG (28): n29-28= 0.729091.
DEBUG (28): a29-28= 24247.
DEBUG (28): b29-28= 58981.
DEBUG (39): packet received from 49.
DEBUG (39): r404939= 0.
DEBUG (39): r4039= 0.
DEBUG (39): r4939= 0.
DEBUG (39): s39[0]= 0.000000.
DEBUG (39): s39[1]= 1.000000.
DEBUG (39): s39[2]= 0.000000.
DEBUG (39): s39[3]= 0.428600.
DEBUG (39): ws1= 4.
DEBUG (39): ws2= 4.
DEBUG (39): temppkt1= 9.
DEBUG (39): wa1= 9160.
DEBUG (39): wb1= 9520.
DEBUG (39): temppkt2= 9.
DEBUG (39): wa1= 1600.
DEBUG (39): wb1= 5200.
DEBUG (39): wa2= 0.160000.
DEBUG (39): wb2= 0.520000.
DEBUG (39): temppkt->n1= 9.
DEBUG (39): temppkt->n2= 9.
DEBUG (39): temppkt->n3= 100.
DEBUG (39): temppkt->n4= 100.
DEBUG (39): temppkt->n5= 100.
DEBUG (39): temppkt->n6= 100.
DEBUG (39): m49-39= 0.991699.
DEBUG (39): n49-39= 0.995257.
DEBUG (39): a49-39= 10485.
DEBUG (39): b49-39= 34078.
DEBUG (48): packet received from 49.
DEBUG (48): r4948= 0.
DEBUG (48): ws1= 4.
DEBUG (48): ws2= 5.
DEBUG (48): wa2= 0.995200.
DEBUG (48): wb2= 1.000000.
DEBUG (48): temppkt->n1= 100.
DEBUG (48): temppkt->n2= 100.
DEBUG (48): temppkt->n3= 100.
DEBUG (48): temppkt->n4= 100.
DEBUG (48): temppkt->n5= 100.
DEBUG (48): temppkt->n6= 100.
DEBUG (48): m49-48= 0.995257.
DEBUG (48): n49-48= 1.000000.
DEBUG (48): a49-48= 65220.
DEBUG (48): b49-48= 65535.
DEBUG (41): packet received from 42.
DEBUG (41): r4241= 0.
DEBUG (41): ws1= 4.
DEBUG (41): ws2= 4.
DEBUG (41): wa2= 0.897200.
DEBUG (41): wb2= 0.905500.
DEBUG (41): temppkt->n1= 100.
DEBUG (41): temppkt->n2= 100.
DEBUG (41): temppkt->n3= 100.
DEBUG (41): temppkt->n4= 100.
DEBUG (41): temppkt->n5= 100.
DEBUG (41): temppkt->n6= 100.
DEBUG (41): m42-41= 0.897292.
DEBUG (41): n42-41= 0.905592.
DEBUG (41): a42-41= 58798.
DEBUG (41): b42-41= 59341.
DEBUG (7): packet received from 10.
DEBUG (7): r10227= 0.
DEBUG (7): r107= 0.
DEBUG (7): r227= 0.
DEBUG (7): s7[0]= 0.000000.
DEBUG (7): s7[1]= 1.000000.
DEBUG (7): s7[2]= 0.000000.
DEBUG (7): s7[3]= 1.000000.
DEBUG (7): ws1= 4.
DEBUG (7): ws2= 4.
DEBUG (7): wa2= 0.596500.
DEBUG (7): wb2= 0.689700.
DEBUG (7): temppkt->n1= 100.
DEBUG (7): temppkt->n2= 100.
DEBUG (7): temppkt->n3= 100.
DEBUG (7): temppkt->n4= 100.
DEBUG (7): temppkt->n5= 100.
DEBUG (7): temppkt->n6= 100.
DEBUG (7): m10-7= 0.596597.
DEBUG (7): n10-7= 0.689799.
DEBUG (7): a10-7= 39091.
DEBUG (7): b10-7= 45199.
DEBUG (14): packet received from 15.
DEBUG (14): r152714= 0.
DEBUG (14): r1514= 0.
DEBUG (14): r2714= 0.
DEBUG (14): s14[0]= 0.000000.
DEBUG (14): s14[1]= 1.000000.
DEBUG (14): s14[2]= 0.000000.
DEBUG (14): s14[3]= 0.545500.
DEBUG (14): ws1= 4.
DEBUG (14): ws2= 4.
DEBUG (14): wa2= 0.893100.
DEBUG (14): wb2= 0.926100.
DEBUG (14): temppkt->n1= 100.
DEBUG (14): temppkt->n2= 100.
DEBUG (14): temppkt->n3= 100.
DEBUG (14): temppkt->n4= 100.
DEBUG (14): temppkt->n5= 100.
DEBUG (14): temppkt->n6= 100.
DEBUG (14): m15-14= 0.893187.
DEBUG (14): n15-14= 0.926192.
DEBUG (14): a15-14= 58529.
DEBUG (14): b15-14= 60691.
DEBUG (45): packet received from 46.
DEBUG (45): r4645= 0.
DEBUG (45): ws1= 4.
DEBUG (45): ws2= 4.
DEBUG (45): temppkt1= 9.
DEBUG (45): wa1= 6680.
DEBUG (45): wb1= 7340.
DEBUG (45): wa2= 0.668000.
DEBUG (45): wb2= 0.734000.
DEBUG (45): a1= 0.
DEBUG (45): temppkt->n1= 9.
DEBUG (45): temppkt->n2= 100.
DEBUG (45): temppkt->n3= 100.
DEBUG (45): temppkt->n4= 100.
DEBUG (45): temppkt->n5= 100.
DEBUG (45): temppkt->n6= 100.
DEBUG (45): m46-45= 0.966879.
DEBUG (45): n46-45= 0.973495.
DEBUG (45): a46-45= 43777.
DEBUG (45): b46-45= 48102.
DEBUG (34): packet received from 46.
DEBUG (34): r354634= 0.
DEBUG (34): r3534= 0.
DEBUG (34): r4634= 0.
DEBUG (34): s34[0]= 0.448300.
DEBUG (34): s34[1]= 1.000000.
DEBUG (34): s34[2]= 0.000000.
DEBUG (34): s34[3]= 0.466700.
DEBUG (34): ws1= 4.
DEBUG (34): ws2= 4.
DEBUG (34): temppkt1= 9.
DEBUG (34): wa1= 6100.
DEBUG (34): wb1= 6680.
DEBUG (34): temppkt2= 6.
DEBUG (34): wa1= 1000.
DEBUG (34): wb1= 6800.
DEBUG (34): wa2= 0.100000.
DEBUG (34): wb2= 0.680000.
DEBUG (34): temppkt->n1= 9.
DEBUG (34): temppkt->n2= 6.
DEBUG (34): temppkt->n3= 100.
DEBUG (34): temppkt->n4= 100.
DEBUG (34): temppkt->n5= 100.
DEBUG (34): temppkt->n6= 100.
DEBUG (34): m46-34= 0.961089.
DEBUG (34): n46-34= 0.966879.
DEBUG (34): a46-34= 6553.
DEBUG (34): b46-34= 44563.
DEBUG (19): packet received from 20.
DEBUG (19): r203219= 0.
DEBUG (19): r2019= 0.
DEBUG (19): r3219= 0.
DEBUG (19): s19[0]= 0.000000.
DEBUG (19): s19[1]= 1.000000.
DEBUG (19): s19[2]= 0.000000.
DEBUG (19): s19[3]= 0.428600.
DEBUG (19): ws1= 4.
DEBUG (19): ws2= 5.
DEBUG (19): wa2= 0.983100.
DEBUG (19): wb2= 1.000000.
DEBUG (19): temppkt->n1= 100.
DEBUG (19): temppkt->n2= 100.
DEBUG (19): temppkt->n3= 100.
DEBUG (19): temppkt->n4= 100.
DEBUG (19): temppkt->n5= 100.
DEBUG (19): temppkt->n6= 100.
DEBUG (19): m20-19= 0.983200.
DEBUG (19): n20-19= 1.000000.
DEBUG (19): a20-19= 64427.
DEBUG (19): b20-19= 65535.
DEBUG (23): packet received from 24.
DEBUG (23): r2423= 0.
DEBUG (23): ws1= 4.
DEBUG (23): ws2= 4.
DEBUG (23): temppkt1= 6.
DEBUG (23): wa1= 300.
DEBUG (23): wb1= 3120.
DEBUG (23): wa2= 0.030000.
DEBUG (23): wb2= 0.312000.
DEBUG (23): a1= 0.
DEBUG (23): temppkt->n1= 6.
DEBUG (23): temppkt->n2= 100.
DEBUG (23): temppkt->n3= 100.
DEBUG (23): temppkt->n4= 100.
DEBUG (23): temppkt->n5= 100.
DEBUG (23): temppkt->n6= 100.
DEBUG (23): m24-23= 0.603098.
DEBUG (23): n24-23= 0.631296.
DEBUG (23): a24-23= 1966.
DEBUG (23): b24-23= 20446.
DEBUG (17): packet received from 18.
DEBUG (17): r1817= 0.
DEBUG (17): ws1= 4.
DEBUG (17): ws2= 4.
DEBUG (17): wa2= 0.720900.
DEBUG (17): wb2= 0.830900.
DEBUG (17): temppkt->n1= 9.
DEBUG (17): temppkt->n2= 100.
DEBUG (17): temppkt->n3= 100.
DEBUG (17): temppkt->n4= 100.
DEBUG (17): temppkt->n5= 100.
DEBUG (17): temppkt->n6= 100.
DEBUG (17): m18-17= 0.720989.
DEBUG (17): n18-17= 0.830991.
DEBUG (17): a18-17= 47244.
DEBUG (17): b18-17= 54453.
DEBUG (27): packet received from 28.
DEBUG (27): r2827= 0.
DEBUG (27): ws1= 4.
DEBUG (27): ws2= 4.
DEBUG (27): wa2= 0.369900.
DEBUG (27): wb2= 0.899900.
DEBUG (27): temppkt->n1= 7.
DEBUG (27): temppkt->n2= 2.
DEBUG (27): temppkt->n3= 100.
DEBUG (27): temppkt->n4= 100.
DEBUG (27): temppkt->n5= 100.
DEBUG (27): temppkt->n6= 100.
DEBUG (27): m28-27= 0.369985.
DEBUG (27): n28-27= 0.899992.
DEBUG (27): a28-27= 24241.
DEBUG (27): b28-27= 58974.
DEBUG (15): packet received from 16.
DEBUG (15): r1615= 0.
DEBUG (15): ws1= 4.
DEBUG (15): ws2= 4.
DEBUG (15): temppkt1= 9.
DEBUG (15): wa1= 2610.
DEBUG (15): wb1= 5930.
DEBUG (15): wa2= 0.261000.
DEBUG (15): wb2= 0.593000.
DEBUG (15): a1= 0.
DEBUG (15): temppkt->n1= 9.
DEBUG (15): temppkt->n2= 100.
DEBUG (15): temppkt->n3= 100.
DEBUG (15): temppkt->n4= 100.
DEBUG (15): temppkt->n5= 100.
DEBUG (15): temppkt->n6= 100.
DEBUG (15): m16-15= 0.926192.
DEBUG (15): n16-15= 0.959396.
DEBUG (15): a16-15= 17104.
DEBUG (15): b16-15= 38862.
DEBUG (1): packet received from 4.
DEBUG (1): r341= 0.
DEBUG (1): r31= 0.
DEBUG (1): r41= 0.
DEBUG (1): s1[0]= 0.000000.
DEBUG (1): s1[1]= 1.000000.
DEBUG (1): s1[2]= 0.000000.
DEBUG (1): s1[3]= 1.000000.
DEBUG (1): ws1= 4.
DEBUG (1): ws2= 4.
DEBUG (1): wa2= 0.195500.
DEBUG (1): wb2= 0.314700.
DEBUG (1): temppkt->n1= 100.
DEBUG (1): temppkt->n2= 100.
DEBUG (1): temppkt->n3= 100.
DEBUG (1): temppkt->n4= 100.
DEBUG (1): temppkt->n5= 100.
DEBUG (1): temppkt->n6= 100.
DEBUG (1): m4-1= 0.195590.
DEBUG (1): n4-1= 0.314794.
DEBUG (1): a4-1= 12812.
DEBUG (1): b4-1= 20623.
DEBUG (5): packet received from 8.
DEBUG (5): r895= 0.
DEBUG (5): r85= 0.
DEBUG (5): r95= 0.
DEBUG (5): s5[0]= 0.409100.
DEBUG (5): s5[1]= 1.000000.
DEBUG (5): s5[2]= 0.000000.
DEBUG (5): s5[3]= 0.231900.
DEBUG (5): ws1= 4.
DEBUG (5): ws2= 4.
DEBUG (5): temppkt1= 5.
DEBUG (5): wa1= 3030.
DEBUG (5): wb1= 5670.
DEBUG (5): wa2= 0.303000.
DEBUG (5): wb2= 0.567000.
DEBUG (5): a1= 0.
DEBUG (5): temppkt->n1= 5.
DEBUG (5): temppkt->n2= 100.
DEBUG (5): temppkt->n3= 100.
DEBUG (5): temppkt->n4= 100.
DEBUG (5): temppkt->n5= 100.
DEBUG (5): temppkt->n6= 100.
DEBUG (5): m8-5= 0.530314.
DEBUG (5): n8-5= 0.556786.
DEBUG (5): a8-5= 19857.
DEBUG (5): b8-5= 37158.
DEBUG (38): packet received from 39.
DEBUG (38): r3938= 0.
DEBUG (38): ws1= 4.
DEBUG (38): ws2= 4.
DEBUG (38): wa2= 0.327100.
DEBUG (38): wb2= 0.519900.
DEBUG (38): temppkt->n1= 9.
DEBUG (38): temppkt->n2= 9.
DEBUG (38): temppkt->n3= 100.
DEBUG (38): temppkt->n4= 100.
DEBUG (38): temppkt->n5= 100.
DEBUG (38): temppkt->n6= 100.
DEBUG (38): m39-38= 0.327142.
DEBUG (38): n39-38= 0.519997.
DEBUG (38): a39-38= 21436.
DEBUG (38): b39-38= 34071.
DEBUG (28): packet received from 39.
DEBUG (28): r293928= 0.
DEBUG (28): r2928= 0.
DEBUG (28): r3928= 0.
DEBUG (28): s28[0]= 0.541700.
DEBUG (28): s28[1]= 1.000000.
DEBUG (28): s28[2]= 0.000000.
DEBUG (28): s28[3]= 0.464300.
DEBUG (28): ws1= 4.
DEBUG (28): ws2= 4.
DEBUG (28): wa2= 0.159900.
DEBUG (28): wb2= 0.327100.
DEBUG (28): temppkt->n1= 9.
DEBUG (28): temppkt->n2= 9.
DEBUG (28): temppkt->n3= 100.
DEBUG (28): temppkt->n4= 100.
DEBUG (28): temppkt->n5= 100.
DEBUG (28): temppkt->n6= 100.
DEBUG (28): m39-28= 0.159991.
DEBUG (28): n39-28= 0.327142.
DEBUG (28): a39-28= 10479.
DEBUG (28): b39-28= 21436.
DEBUG (43): packet received from 44.
DEBUG (43): r334443= 0.
DEBUG (43): r3343= 0.
DEBUG (43): r4443= 0.
DEBUG (43): s43[0]= 0.561000.
DEBUG (43): s43[1]= 1.000000.
DEBUG (43): s43[2]= 0.000000.
DEBUG (43): s43[3]= 1.000000.
DEBUG (43): ws1= 4.
DEBUG (43): ws2= 4.
DEBUG (43): wa2= 0.476900.
DEBUG (43): wb2= 0.609900.
DEBUG (43): temppkt->n1= 9.
DEBUG (43): temppkt->n2= 100.
DEBUG (43): temppkt->n3= 100.
DEBUG (43): temppkt->n4= 100.
DEBUG (43): temppkt->n5= 100.
DEBUG (43): temppkt->n6= 100.
DEBUG (43): m44-43= 0.476997.
DEBUG (43): n44-43= 0.609995.
DEBUG (43): a44-43= 31253.
DEBUG (43): b44-43= 39969.
DEBUG (7): packet received from 22.
DEBUG (7): r10227= 0.
DEBUG (7): r107= 0.
DEBUG (7): r227= 0.
DEBUG (7): s7[0]= 0.000000.
DEBUG (7): s7[1]= 1.000000.
DEBUG (7): s7[2]= 0.000000.
DEBUG (7): s7[3]= 1.000000.
DEBUG (7): ws1= 4.
DEBUG (7): ws2= 4.
DEBUG (7): temppkt1= 5.
DEBUG (7): wa1= 4920.
DEBUG (7): wb1= 8320.
DEBUG (7): wa2= 0.492000.
DEBUG (7): wb2= 0.832000.
DEBUG (7): a1= 0.
DEBUG (7): temppkt->n1= 5.
DEBUG (7): temppkt->n2= 100.
DEBUG (7): temppkt->n3= 100.
DEBUG (7): temppkt->n4= 100.
DEBUG (7): temppkt->n5= 100.
DEBUG (7): temppkt->n6= 100.
DEBUG (7): m22-7= 0.549294.
DEBUG (7): n22-7= 0.583291.
DEBUG (7): a22-7= 32243.
DEBUG (7): b22-7= 54525.
DEBUG (24): packet received from 35.
DEBUG (24): r253524= 0.
DEBUG (24): r2524= 0.
DEBUG (24): r3524= 0.
DEBUG (24): s24[0]= 0.511600.
DEBUG (24): s24[1]= 1.000000.
DEBUG (24): s24[2]= 0.000000.
DEBUG (24): s24[3]= 0.448300.
DEBUG (24): ws1= 4.
DEBUG (24): ws2= 4.
DEBUG (24): temppkt1= 8.
DEBUG (24): wa1= 440.
DEBUG (24): wb1= 1220.
DEBUG (24): wa2= 0.044000.
DEBUG (24): wb2= 0.122000.
DEBUG (24): a1= 0.
DEBUG (24): temppkt->n1= 8.
DEBUG (24): temppkt->n2= 100.
DEBUG (24): temppkt->n3= 100.
DEBUG (24): temppkt->n4= 100.
DEBUG (24): temppkt->n5= 100.
DEBUG (24): temppkt->n6= 100.
DEBUG (24): m35-24= 0.804486.
DEBUG (24): n35-24= 0.812291.
DEBUG (24): a35-24= 2883.
DEBUG (24): b35-24= 7995.
DEBUG (34): packet received from 35.
DEBUG (34): r354634= 0.
DEBUG (34): r3534= 0.
DEBUG (34): r4634= 0.
DEBUG (34): s34[0]= 0.448300.
DEBUG (34): s34[1]= 1.000000.
DEBUG (34): s34[2]= 0.000000.
DEBUG (34): s34[3]= 0.466700.
DEBUG (34): ws1= 4.
DEBUG (34): ws2= 4.
DEBUG (34): temppkt1= 8.
DEBUG (34): wa1= 1220.
DEBUG (34): wb1= 2180.
DEBUG (34): wa2= 0.122000.
DEBUG (34): wb2= 0.218000.
DEBUG (34): a1= 0.
DEBUG (34): temppkt->n1= 8.
DEBUG (34): temppkt->n2= 100.
DEBUG (34): temppkt->n3= 100.
DEBUG (34): temppkt->n4= 100.
DEBUG (34): temppkt->n5= 100.
DEBUG (34): temppkt->n6= 100.
DEBUG (34): m35-34= 0.812291.
DEBUG (34): n35-34= 0.821897.
DEBUG (34): a35-34= 7995.
DEBUG (34): b35-34= 14286.
DEBUG (29): packet received from 30.
DEBUG (29): r3029= 0.
DEBUG (29): ws1= 4.
DEBUG (29): ws2= 4.
DEBUG (29): wa2= 0.389900.
DEBUG (29): wb2= 0.659900.
DEBUG (29): temppkt->n1= 7.
DEBUG (29): temppkt->n2= 4.
DEBUG (29): temppkt->n3= 100.
DEBUG (29): temppkt->n4= 100.
DEBUG (29): temppkt->n5= 100.
DEBUG (29): temppkt->n6= 100.
DEBUG (29): m30-29= 0.389990.
DEBUG (29): n30-29= 0.659998.
DEBUG (29): a30-29= 25552.
DEBUG (29): b30-29= 43246.
DEBUG (2): packet received from 6.
DEBUG (2): r62= 0.
DEBUG (2): ws1= 4.
DEBUG (2): ws2= 4.
DEBUG (2): wa2= 0.659900.
DEBUG (2): wb2= 0.797900.
DEBUG (2): temppkt->n1= 5.
DEBUG (2): temppkt->n2= 100.
DEBUG (2): temppkt->n3= 100.
DEBUG (2): temppkt->n4= 100.
DEBUG (2): temppkt->n5= 100.
DEBUG (2): temppkt->n6= 100.
DEBUG (2): m6-2= 0.659998.
DEBUG (2): n6-2= 0.797986.
DEBUG (2): a6-2= 43246.
DEBUG (2): b6-2= 52290.
DEBUG (40): packet received from 41.
DEBUG (40): r4140= 0.
DEBUG (40): ws1= 4.
DEBUG (40): ws2= 4.
DEBUG (40): temppkt1= 9.
DEBUG (40): wa1= 110.
DEBUG (40): wb1= 540.
DEBUG (40): temppkt2= 0.
DEBUG (40): wa1= 1100.
DEBUG (40): wb1= 5400.
DEBUG (40): wa2= 0.110000.
DEBUG (40): wb2= 0.540000.
DEBUG (40): temppkt->n1= 9.
DEBUG (40): temppkt->n2= 0.
DEBUG (40): temppkt->n3= 100.
DEBUG (40): temppkt->n4= 100.
DEBUG (40): temppkt->n5= 100.
DEBUG (40): temppkt->n6= 100.
DEBUG (40): m41-40= 0.901125.
DEBUG (40): n41-40= 0.905486.
DEBUG (40): a41-40= 7208.
DEBUG (40): b41-40= 35388.
DEBUG (11): packet received from 12.
DEBUG (11): r1211= 0.
DEBUG (11): ws1= 4.
DEBUG (11): ws2= 4.
DEBUG (11): temppkt1= 7.
DEBUG (11): wa1= 3230.
DEBUG (11): wb1= 9530.
DEBUG (11): wa2= 0.323000.
DEBUG (11): wb2= 0.953000.
DEBUG (11): a1= 0.
DEBUG (11): temppkt->n1= 7.
DEBUG (11): temppkt->n2= 100.
DEBUG (11): temppkt->n3= 100.
DEBUG (11): temppkt->n4= 100.
DEBUG (11): temppkt->n5= 100.
DEBUG (11): temppkt->n6= 100.
DEBUG (11): m12-11= 0.732387.
DEBUG (11): n12-11= 0.795392.
DEBUG (11): a12-11= 21167.
DEBUG (11): b12-11= 62454.
DEBUG (1): packet received from 3.
DEBUG (1): r341= 0.
DEBUG (1): r31= 0.
DEBUG (1): r41= 0.
DEBUG (1): s1[0]= 0.000000.
DEBUG (1): s1[1]= 1.000000.
DEBUG (1): s1[2]= 0.000000.
DEBUG (1): s1[3]= 1.000000.
DEBUG (1): ws1= 4.
DEBUG (1): ws2= 4.
DEBUG (1): wa2= 0.240900.
DEBUG (1): wb2= 0.722900.
DEBUG (1): temppkt->n1= 4.
DEBUG (1): temppkt->n2= 100.
DEBUG (1): temppkt->n3= 100.
DEBUG (1): temppkt->n4= 100.
DEBUG (1): temppkt->n5= 100.
DEBUG (1): temppkt->n6= 100.
DEBUG (1): m3-1= 0.240986.
DEBUG (1): n3-1= 0.722988.
DEBUG (1): a3-1= 15787.
DEBUG (1): b3-1= 47375.
DEBUG (26): packet received from 27.
DEBUG (26): r273726= 0.
DEBUG (26): r2726= 0.
DEBUG (26): r3726= 0.
DEBUG (26): s26[0]= 0.545500.
DEBUG (26): s26[1]= 1.000000.
DEBUG (26): s26[2]= 0.000000.
DEBUG (26): s26[3]= 0.513500.
DEBUG (26): ws1= 4.
DEBUG (26): ws2= 4.
DEBUG (26): wa2= 0.659000.
DEBUG (26): wb2= 0.899800.
DEBUG (26): temppkt->n1= 7.
DEBUG (26): temppkt->n2= 2.
DEBUG (26): temppkt->n3= 100.
DEBUG (26): temppkt->n4= 100.
DEBUG (26): temppkt->n5= 100.
DEBUG (26): temppkt->n6= 100.
DEBUG (26): m27-26= 0.659004.
DEBUG (26): n27-26= 0.899886.
DEBUG (26): a27-26= 43187.
DEBUG (26): b27-26= 58968.
DEBUG (14): packet received from 27.
DEBUG (14): r152714= 0.
DEBUG (14): r1514= 0.
DEBUG (14): r2714= 0.
DEBUG (14): s14[0]= 0.000000.
DEBUG (14): s14[1]= 1.000000.
DEBUG (14): s14[2]= 0.000000.
DEBUG (14): s14[3]= 0.545500.
DEBUG (14): ws1= 4.
DEBUG (14): ws2= 4.
DEBUG (14): wa2= 0.369800.
DEBUG (14): wb2= 0.659000.
DEBUG (14): temppkt->n1= 7.
DEBUG (14): temppkt->n2= 2.
DEBUG (14): temppkt->n3= 100.
DEBUG (14): temppkt->n4= 100.
DEBUG (14): temppkt->n5= 100.
DEBUG (14): temppkt->n6= 100.
DEBUG (14): m27-14= 0.369894.
DEBUG (14): n27-14= 0.659004.
DEBUG (14): a27-14= 24234.
DEBUG (14): b27-14= 43187.
DEBUG (47): packet received from 48.
DEBUG (47): r4847= 0.
DEBUG (47): ws1= 4.
DEBUG (47): ws2= 5.
DEBUG (47): wa2= 0.997100.
DEBUG (47): wb2= 1.000000.
DEBUG (47): temppkt->n1= 100.
DEBUG (47): temppkt->n2= 100.
DEBUG (47): temppkt->n3= 100.
DEBUG (47): temppkt->n4= 100.
DEBUG (47): temppkt->n5= 100.
DEBUG (47): temppkt->n6= 100.
DEBUG (47): m48-47= 0.997196.
DEBUG (47): n48-47= 1.000000.
DEBUG (47): a48-47= 65344.
DEBUG (47): b48-47= 65535.
DEBUG (31): packet received from 32.
DEBUG (31): r3231= 0.
DEBUG (31): ws1= 4.
DEBUG (31): ws2= 4.
DEBUG (31): temppkt1= 7.
DEBUG (31): wa1= 5410.
DEBUG (31): wb1= 5880.
DEBUG (31): temppkt2= 5.
DEBUG (31): wa1= 4100.
DEBUG (31): wb1= 8800.
DEBUG (31): wa2= 0.410000.
DEBUG (31): wb2= 0.880000.
DEBUG (31): temppkt->n1= 7.
DEBUG (31): temppkt->n2= 5.
DEBUG (31): temppkt->n3= 100.
DEBUG (31): temppkt->n4= 100.
DEBUG (31): temppkt->n5= 100.
DEBUG (31): temppkt->n6= 100.
DEBUG (31): m32-31= 0.754149.
DEBUG (31): n32-31= 0.758892.
DEBUG (31): a32-31= 26869.
DEBUG (31): b32-31= 57670.
DEBUG (19): packet received from 32.
DEBUG (19): r203219= 0.
DEBUG (19): r2019= 0.
DEBUG (19): r3219= 0.
DEBUG (19): s19[0]= 0.000000.
DEBUG (19): s19[1]= 1.000000.
DEBUG (19): s19[2]= 0.000000.
DEBUG (19): s19[3]= 0.428600.
DEBUG (19): ws1= 4.
DEBUG (19): ws2= 4.
DEBUG (19): temppkt1= 7.
DEBUG (19): wa1= 5050.
DEBUG (19): wb1= 5410.
DEBUG (19): temppkt2= 5.
DEBUG (19): wa1= 500.
DEBUG (19): wb1= 4100.
DEBUG (19): wa2= 0.050000.
DEBUG (19): wb2= 0.410000.
DEBUG (19): temppkt->n1= 7.
DEBUG (19): temppkt->n2= 5.
DEBUG (19): temppkt->n3= 100.
DEBUG (19): temppkt->n4= 100.
DEBUG (19): temppkt->n5= 100.
DEBUG (19): temppkt->n6= 100.
DEBUG (19): m32-19= 0.750591.
DEBUG (19): n32-19= 0.754149.
DEBUG (19): a32-19= 3276.
DEBUG (19): b32-19= 26869.
DEBUG (50): packet received from 2.
DEBUG (50): sourceid= 9.
DEBUG (50): r1250= 0.
DEBUG (50): r150= 0.
DEBUG (50): r250= 0.
DEBUG (50): s50[0]= 0.000000.
DEBUG (50): s50[1]= 1.000000.
DEBUG (50): s50[2]= 0.000000.
DEBUG (50): s50[3]= 1.000000.
DEBUG (50): a1= 43246.
DEBUG (50): b1= 52290.
DEBUG (50): btrpkt->n1= 5.
DEBUG (50): btrpkt->n2= 100.
DEBUG (50): btrpkt->n3= 100.
DEBUG (50): btrpkt->n4= 100.
DEBUG (50): btrpkt->n5= 100.
DEBUG (50): btrpkt->n6= 100.
DEBUG (50): ws1= 4.
DEBUG (50): ws2= 4.
DEBUG (50): wa2= 0.659800.
DEBUG (50): wb2= 0.797800.
DEBUG (50): btrpkt->n1= 5.
DEBUG (50): btrpkt->n2= 100.
DEBUG (50): btrpkt->n3= 100.
DEBUG (50): btrpkt->n4= 100.
DEBUG (50): btrpkt->n5= 100.
DEBUG (50): btrpkt->n6= 100.
DEBUG (50): m= 0.659892.
DEBUG (50): n= 0.797894.
DEBUG (50): a2= 43239.
DEBUG (50): b2= 52283.
DEBUG (37): packet received from 38.
DEBUG (37): r3837= 0.
DEBUG (37): ws1= 4.
DEBUG (37): ws2= 4.
DEBUG (37): wa2= 0.327000.
DEBUG (37): wb2= 0.519800.
DEBUG (37): temppkt->n1= 9.
DEBUG (37): temppkt->n2= 9.
DEBUG (37): temppkt->n3= 100.
DEBUG (37): temppkt->n4= 100.
DEBUG (37): temppkt->n5= 100.
DEBUG (37): temppkt->n6= 100.
DEBUG (37): m38-37= 0.327092.
DEBUG (37): n38-37= 0.519890.
DEBUG (37): a38-37= 21429.
DEBUG (37): b38-37= 34065.
DEBUG (9): packet received from 43.
DEBUG (9): r439= 0.
DEBUG (9): ws1= 4.
DEBUG (9): ws2= 4.
DEBUG (9): wa2= 0.476800.
DEBUG (9): wb2= 0.609800.
DEBUG (9): temppkt->n1= 9.
DEBUG (9): temppkt->n2= 100.
DEBUG (9): temppkt->n3= 100.
DEBUG (9): temppkt->n4= 100.
DEBUG (9): temppkt->n5= 100.
DEBUG (9): temppkt->n6= 100.
DEBUG (9): m43-9= 0.476890.
DEBUG (9): n43-9= 0.609888.
DEBUG (9): a43-9= 31247.
DEBUG (9): b43-9= 39963.
DEBUG (16): packet received from 17.
DEBUG (16): r172916= 0.
DEBUG (16): r1716= 0.
DEBUG (16): r2916= 0.
DEBUG (16): s16[0]= 0.000000.
DEBUG (16): s16[1]= 1.000000.
DEBUG (16): s16[2]= 0.000000.
DEBUG (16): s16[3]= 0.541700.
DEBUG (16): ws1= 4.
DEBUG (16): ws2= 4.
DEBUG (16): wa2= 0.720800.
DEBUG (16): wb2= 0.830800.
DEBUG (16): temppkt->n1= 9.
DEBUG (16): temppkt->n2= 100.
DEBUG (16): temppkt->n3= 100.
DEBUG (16): temppkt->n4= 100.
DEBUG (16): temppkt->n5= 100.
DEBUG (16): temppkt->n6= 100.
DEBUG (16): m17-16= 0.720897.
DEBUG (16): n17-16= 0.830900.
DEBUG (16): a17-16= 47237.
DEBUG (16): b17-16= 54446.
DEBUG (23): packet received from 24.
DEBUG (23): r2423= 0.
DEBUG (23): ws1= 3.
DEBUG (23): ws2= 4.
DEBUG (23): wa2= 0.043900.
DEBUG (23): wb2= 0.121900.
DEBUG (23): temppkt->n1= 8.
DEBUG (23): temppkt->n2= 100.
DEBUG (23): temppkt->n3= 100.
DEBUG (23): temppkt->n4= 100.
DEBUG (23): temppkt->n5= 100.
DEBUG (23): temppkt->n6= 100.
DEBUG (23): m24-23= 0.043992.
DEBUG (23): n24-23= 0.121996.
DEBUG (23): a24-23= 2876.
DEBUG (23): b24-23= 7988.
DEBUG (3): packet received from 7.
DEBUG (3): r73= 0.
DEBUG (3): ws1= 4.
DEBUG (3): ws2= 4.
DEBUG (3): wa2= 0.491900.
DEBUG (3): wb2= 0.678400.
DEBUG (3): temppkt->n1= 5.
DEBUG (3): temppkt->n2= 100.
DEBUG (3): temppkt->n3= 100.
DEBUG (3): temppkt->n4= 100.
DEBUG (3): temppkt->n5= 100.
DEBUG (3): temppkt->n6= 100.
DEBUG (3): m7-3= 0.491997.
DEBUG (3): n7-3= 0.678454.
DEBUG (3): a7-3= 32236.
DEBUG (3): b7-3= 44458.
DEBUG (44): packet received from 45.
DEBUG (44): r4544= 0.
DEBUG (44): ws1= 4.
DEBUG (44): ws2= 4.
DEBUG (44): wa2= 0.667900.
DEBUG (44): wb2= 0.733900.
DEBUG (44): temppkt->n1= 9.
DEBUG (44): temppkt->n2= 100.
DEBUG (44): temppkt->n3= 100.
DEBUG (44): temppkt->n4= 100.
DEBUG (44): temppkt->n5= 100.
DEBUG (44): temppkt->n6= 100.
DEBUG (44): m45-44= 0.667994.
DEBUG (44): n45-44= 0.733989.
DEBUG (44): a45-44= 43770.
DEBUG (44): b45-44= 48096.
DEBUG (13): packet received from 14.
DEBUG (13): r1413= 0.
DEBUG (13): ws1= 4.
DEBUG (13): ws2= 4.
DEBUG (13): wa2= 0.369700.
DEBUG (13): wb2= 0.658900.
DEBUG (13): temppkt->n1= 7.
DEBUG (13): temppkt->n2= 2.
DEBUG (13): temppkt->n3= 100.
DEBUG (13): temppkt->n4= 100.
DEBUG (13): temppkt->n5= 100.
DEBUG (13): temppkt->n6= 100.
DEBUG (13): m14-13= 0.369787.
DEBUG (13): n14-13= 0.658991.
DEBUG (13): a14-13= 24228.
DEBUG (13): b14-13= 43181.
DEBUG (18): packet received from 19.
DEBUG (18): r1918= 0.
DEBUG (18): ws1= 3.
DEBUG (18): ws2= 4.
DEBUG (18): wa2= 0.049900.
DEBUG (18): wb2= 0.409900.
DEBUG (18): temppkt->n1= 7.
DEBUG (18): temppkt->n2= 5.
DEBUG (18): temppkt->n3= 100.
DEBUG (18): temppkt->n4= 100.
DEBUG (18): temppkt->n5= 100.
DEBUG (18): temppkt->n6= 100.
DEBUG (18): m19-18= 0.049989.
DEBUG (18): n19-18= 0.409995.
DEBUG (18): a19-18= 3270.
DEBUG (18): b19-18= 26862.
DEBUG (50): packet received from 1.
DEBUG (50): sourceid= 7.
DEBUG (50): r1250= 0.
DEBUG (50): r150= 0.
DEBUG (50): r250= 0.
DEBUG (50): s50[0]= 0.000000.
DEBUG (50): s50[1]= 1.000000.
DEBUG (50): s50[2]= 0.000000.
DEBUG (50): s50[3]= 1.000000.
DEBUG (50): a1= 15787.
DEBUG (50): b1= 47375.
DEBUG (50): btrpkt->n1= 4.
DEBUG (50): btrpkt->n2= 100.
DEBUG (50): btrpkt->n3= 100.
DEBUG (50): btrpkt->n4= 100.
DEBUG (50): btrpkt->n5= 100.
DEBUG (50): btrpkt->n6= 100.
DEBUG (50): ws1= 4.
DEBUG (50): ws2= 4.
DEBUG (50): wa2= 0.240800.
DEBUG (50): wb2= 0.722800.
DEBUG (50): btrpkt->n1= 4.
DEBUG (50): btrpkt->n2= 100.
DEBUG (50): btrpkt->n3= 100.
DEBUG (50): btrpkt->n4= 100.
DEBUG (50): btrpkt->n5= 100.
DEBUG (50): btrpkt->n6= 100.
DEBUG (50): m= 0.240894.
DEBUG (50): n= 0.722896.
DEBUG (50): a2= 15780.
DEBUG (50): b2= 47368.
DEBUG (26): packet received from 37.
DEBUG (26): r273726= 0.
DEBUG (26): r2726= 0.
DEBUG (26): r3726= 0.
DEBUG (26): s26[0]= 0.545500.
DEBUG (26): s26[1]= 1.000000.
DEBUG (26): s26[2]= 0.000000.
DEBUG (26): s26[3]= 0.513500.
DEBUG (26): ws1= 4.
DEBUG (26): ws2= 4.
DEBUG (26): wa2= 0.326900.
DEBUG (26): wb2= 0.425900.
DEBUG (26): temppkt->n1= 9.
DEBUG (26): temppkt->n2= 9.
DEBUG (26): temppkt->n3= 100.
DEBUG (26): temppkt->n4= 100.
DEBUG (26): temppkt->n5= 100.
DEBUG (26): temppkt->n6= 100.
DEBUG (26): m37-26= 0.326986.
DEBUG (26): n37-26= 0.425995.
DEBUG (26): a37-26= 21423.
DEBUG (26): b37-26= 27911.
DEBUG (36): packet received from 37.
DEBUG (36): r374836= 0.
DEBUG (36): r3736= 0.
DEBUG (36): r4836= 0.
DEBUG (36): s36[0]= 0.513500.
DEBUG (36): s36[1]= 1.000000.
DEBUG (36): s36[2]= 0.000000.
DEBUG (36): s36[3]= 0.416700.
DEBUG (36): ws1= 4.
DEBUG (36): ws2= 4.
DEBUG (36): wa2= 0.425900.
DEBUG (36): wb2= 0.519700.
DEBUG (36): temppkt->n1= 9.
DEBUG (36): temppkt->n2= 9.
DEBUG (36): temppkt->n3= 100.
DEBUG (36): temppkt->n4= 100.
DEBUG (36): temppkt->n5= 100.
DEBUG (36): temppkt->n6= 100.
DEBUG (36): m37-36= 0.425995.
DEBUG (36): n37-36= 0.519799.
DEBUG (36): a37-36= 27911.
DEBUG (36): b37-36= 34058.
DEBUG (15): packet received from 16.
DEBUG (15): r1615= 0.
DEBUG (15): ws1= 4.
DEBUG (15): ws2= 4.
DEBUG (15): wa2= 0.720700.
DEBUG (15): wb2= 0.830700.
DEBUG (15): temppkt->n1= 9.
DEBUG (15): temppkt->n2= 100.
DEBUG (15): temppkt->n3= 100.
DEBUG (15): temppkt->n4= 100.
DEBUG (15): temppkt->n5= 100.
DEBUG (15): temppkt->n6= 100.
DEBUG (15): m16-15= 0.720790.
DEBUG (15): n16-15= 0.830793.
DEBUG (15): a16-15= 47231.
DEBUG (15): b16-15= 54439.
DEBUG (22): packet received from 23.
DEBUG (22): r233322= 0.
DEBUG (22): r2322= 0.
DEBUG (22): r3322= 0.
DEBUG (22): s22[0]= 0.485700.
DEBUG (22): s22[1]= 1.000000.
DEBUG (22): s22[2]= 0.000000.
DEBUG (22): s22[3]= 0.561000.
DEBUG (22): ws1= 3.
DEBUG (22): ws2= 4.
DEBUG (22): wa2= 0.081700.
DEBUG (22): wb2= 0.121800.
DEBUG (22): temppkt->n1= 8.
DEBUG (22): temppkt->n2= 100.
DEBUG (22): temppkt->n3= 100.
DEBUG (22): temppkt->n4= 100.
DEBUG (22): temppkt->n5= 100.
DEBUG (22): temppkt->n6= 100.
DEBUG (22): m23-22= 0.081772.
DEBUG (22): n23-22= 0.121889.
DEBUG (22): a23-22= 5354.
DEBUG (22): b23-22= 7982.
DEBUG (12): packet received from 13.
DEBUG (12): r132512= 0.
DEBUG (12): r1312= 0.
DEBUG (12): r2512= 0.
DEBUG (12): s12[0]= 0.000000.
DEBUG (12): s12[1]= 1.000000.
DEBUG (12): s12[2]= 0.000000.
DEBUG (12): s12[3]= 0.511600.
DEBUG (12): ws1= 4.
DEBUG (12): ws2= 4.
DEBUG (12): wa2= 0.369600.
DEBUG (12): wb2= 0.658800.
DEBUG (12): temppkt->n1= 7.
DEBUG (12): temppkt->n2= 2.
DEBUG (12): temppkt->n3= 100.
DEBUG (12): temppkt->n4= 100.
DEBUG (12): temppkt->n5= 100.
DEBUG (12): temppkt->n6= 100.
DEBUG (12): m13-12= 0.369696.
DEBUG (12): n13-12= 0.658900.
DEBUG (12): a13-12= 24221.
DEBUG (12): b13-12= 43174.
DEBUG (27): packet received from 28.
DEBUG (27): r2827= 0.
DEBUG (27): ws1= 4.
DEBUG (27): ws2= 4.
DEBUG (27): wa2= 0.159800.
DEBUG (27): wb2= 0.327000.
DEBUG (27): temppkt->n1= 9.
DEBUG (27): temppkt->n2= 9.
DEBUG (27): temppkt->n3= 100.
DEBUG (27): temppkt->n4= 100.
DEBUG (27): temppkt->n5= 100.
DEBUG (27): temppkt->n6= 100.
DEBUG (27): m28-27= 0.159899.
DEBUG (27): n28-27= 0.327092.
DEBUG (27): a28-27= 10472.
DEBUG (27): b28-27= 21429.
DEBUG (46): packet received from 47.
DEBUG (46): r4746= 0.
DEBUG (46): ws1= 4.
DEBUG (46): ws2= 5.
DEBUG (46): wa2= 0.997000.
DEBUG (46): wb2= 1.000000.
DEBUG (46): temppkt->n1= 100.
DEBUG (46): temppkt->n2= 100.
DEBUG (46): temppkt->n3= 100.
DEBUG (46): temppkt->n4= 100.
DEBUG (46): temppkt->n5= 100.
DEBUG (46): temppkt->n6= 100.
DEBUG (46): m47-46= 0.997086.
DEBUG (46): n47-46= 1.000000.
DEBUG (46): a47-46= 65338.
DEBUG (46): b47-46= 65535.
DEBUG (5): packet received from 9.
DEBUG (5): r895= 0.
DEBUG (5): r85= 0.
DEBUG (5): r95= 0.
DEBUG (5): s5[0]= 0.409100.
DEBUG (5): s5[1]= 1.000000.
DEBUG (5): s5[2]= 0.000000.
DEBUG (5): s5[3]= 0.231900.
DEBUG (5): ws1= 4.
DEBUG (5): ws2= 4.
DEBUG (5): wa2= 0.476700.
DEBUG (5): wb2= 0.507600.
DEBUG (5): temppkt->n1= 9.
DEBUG (5): temppkt->n2= 100.
DEBUG (5): temppkt->n3= 100.
DEBUG (5): temppkt->n4= 100.
DEBUG (5): temppkt->n5= 100.
DEBUG (5): temppkt->n6= 100.
DEBUG (5): m9-5= 0.476799.
DEBUG (5): n9-5= 0.507641.
DEBUG (5): a9-5= 31240.
DEBUG (5): b9-5= 33265.
DEBUG (21): packet received from 9.
DEBUG (21): r921= 0.
DEBUG (21): ws1= 4.
DEBUG (21): ws2= 4.
DEBUG (21): wa2= 0.553800.
DEBUG (21): wb2= 0.609700.
DEBUG (21): temppkt->n1= 9.
DEBUG (21): temppkt->n2= 100.
DEBUG (21): temppkt->n3= 100.
DEBUG (21): temppkt->n4= 100.
DEBUG (21): temppkt->n5= 100.
DEBUG (21): temppkt->n6= 100.
DEBUG (21): m9-21= 0.553897.
DEBUG (21): n9-21= 0.609796.
DEBUG (21): a9-21= 36293.
DEBUG (21): b9-21= 39956.
DEBUG (14): packet received from 15.
DEBUG (14): r152714= 0.
DEBUG (14): r1514= 0.
DEBUG (14): r2714= 0.
DEBUG (14): s14[0]= 0.000000.
DEBUG (14): s14[1]= 1.000000.
DEBUG (14): s14[2]= 0.000000.
DEBUG (14): s14[3]= 0.545500.
DEBUG (14): ws1= 4.
DEBUG (14): ws2= 4.
DEBUG (14): wa2= 0.720600.
DEBUG (14): wb2= 0.830600.
DEBUG (14): temppkt->n1= 9.
DEBUG (14): temppkt->n2= 100.
DEBUG (14): temppkt->n3= 100.
DEBUG (14): temppkt->n4= 100.
DEBUG (14): temppkt->n5= 100.
DEBUG (14): temppkt->n6= 100.
DEBUG (14): m15-14= 0.720699.
DEBUG (14): n15-14= 0.830686.
DEBUG (14): a15-14= 47224.
DEBUG (14): b15-14= 54433.
DEBUG (25): packet received from 26.
DEBUG (25): r2625= 0.
DEBUG (25): ws1= 4.
DEBUG (25): ws2= 4.
DEBUG (25): wa2= 0.326800.
DEBUG (25): wb2= 0.425800.
DEBUG (25): temppkt->n1= 9.
DEBUG (25): temppkt->n2= 9.
DEBUG (25): temppkt->n3= 100.
DEBUG (25): temppkt->n4= 100.
DEBUG (25): temppkt->n5= 100.
DEBUG (25): temppkt->n6= 100.
DEBUG (25): m26-25= 0.326894.
DEBUG (25): n26-25= 0.425895.
DEBUG (25): a26-25= 21416.
DEBUG (25): b26-25= 27904.
DEBUG (33): packet received from 34.
DEBUG (33): r3433= 0.
DEBUG (33): ws1= 4.
DEBUG (33): ws2= 4.
DEBUG (33): wa2= 0.121900.
DEBUG (33): wb2= 0.217900.
DEBUG (33): temppkt->n1= 8.
DEBUG (33): temppkt->n2= 100.
DEBUG (33): temppkt->n3= 100.
DEBUG (33): temppkt->n4= 100.
DEBUG (33): temppkt->n5= 100.
DEBUG (33): temppkt->n6= 100.
DEBUG (33): m34-33= 0.121996.
DEBUG (33): n34-33= 0.217990.
DEBUG (33): a34-33= 7988.
DEBUG (33): b34-33= 14280.
DEBUG (17): packet received from 18.
DEBUG (17): r1817= 0.
DEBUG (17): ws1= 3.
DEBUG (17): ws2= 4.
DEBUG (17): wa2= 0.049800.
DEBUG (17): wb2= 0.409800.
DEBUG (17): temppkt->n1= 7.
DEBUG (17): temppkt->n2= 5.
DEBUG (17): temppkt->n3= 100.
DEBUG (17): temppkt->n4= 100.
DEBUG (17): temppkt->n5= 100.
DEBUG (17): temppkt->n6= 100.
DEBUG (17): m18-17= 0.049897.
DEBUG (17): n18-17= 0.409888.
DEBUG (17): a18-17= 3263.
DEBUG (17): b18-17= 26856.
DEBUG (7): packet received from 22.
DEBUG (7): r10227= 0.
DEBUG (7): r107= 0.
DEBUG (7): r227= 0.
DEBUG (7): s7[0]= 0.000000.
DEBUG (7): s7[1]= 1.000000.
DEBUG (7): s7[2]= 0.000000.
DEBUG (7): s7[3]= 1.000000.
DEBUG (7): ws1= 3.
DEBUG (7): ws2= 4.
DEBUG (7): wa2= 0.081600.
DEBUG (7): wb2= 0.121700.
DEBUG (7): temppkt->n1= 8.
DEBUG (7): temppkt->n2= 100.
DEBUG (7): temppkt->n3= 100.
DEBUG (7): temppkt->n4= 100.
DEBUG (7): temppkt->n5= 100.
DEBUG (7): temppkt->n6= 100.
DEBUG (7): m22-7= 0.081697.
DEBUG (7): n22-7= 0.121798.
DEBUG (7): a22-7= 5347.
DEBUG (7): b22-7= 7975.
DEBUG (13): packet received from 14.
DEBUG (13): r1413= 0.
DEBUG (13): ws1= 4.
DEBUG (13): ws2= 4.
DEBUG (13): wa2= 0.720500.
DEBUG (13): wb2= 0.830500.
DEBUG (13): temppkt->n1= 9.
DEBUG (13): temppkt->n2= 100.
DEBUG (13): temppkt->n3= 100.
DEBUG (13): temppkt->n4= 100.
DEBUG (13): temppkt->n5= 100.
DEBUG (13): temppkt->n6= 100.
DEBUG (13): m14-13= 0.720592.
DEBUG (13): n14-13= 0.830594.
DEBUG (13): a14-13= 47217.
DEBUG (13): b14-13= 54426.
DEBUG (43): packet received from 44.
DEBUG (43): r334443= 0.
DEBUG (43): r3343= 0.
DEBUG (43): r4443= 0.
DEBUG (43): s43[0]= 0.561000.
DEBUG (43): s43[1]= 1.000000.
DEBUG (43): s43[2]= 0.000000.
DEBUG (43): s43[3]= 1.000000.
DEBUG (43): ws1= 4.
DEBUG (43): ws2= 4.
DEBUG (43): wa2= 0.667800.
DEBUG (43): wb2= 0.733800.
DEBUG (43): temppkt->n1= 9.
DEBUG (43): temppkt->n2= 100.
DEBUG (43): temppkt->n3= 100.
DEBUG (43): temppkt->n4= 100.
DEBUG (43): temppkt->n5= 100.
DEBUG (43): temppkt->n6= 100.
DEBUG (43): m44-43= 0.667887.
DEBUG (43): n44-43= 0.733898.
DEBUG (43): a44-43= 43764.
DEBUG (43): b44-43= 48089.
DEBUG (4): packet received from 5.
DEBUG (4): r5784= 0.
DEBUG (4): r54= 0.
DEBUG (4): r74= 0.
DEBUG (4): r84= 0.
DEBUG (4): s4[0]= 0.000000.
DEBUG (4): s4[1]= 1.000000.
DEBUG (4): s4[2]= 0.548400.
DEBUG (4): s4[3]= 1.000000.
DEBUG (4): s4[4]= 0.000000.
DEBUG (4): s4[5]= 0.409100.
DEBUG (4): ws1= 4.
DEBUG (4): ws2= 4.
DEBUG (4): wa2= 0.476600.
DEBUG (4): wb2= 0.507500.
DEBUG (4): temppkt->n1= 9.
DEBUG (4): temppkt->n2= 100.
DEBUG (4): temppkt->n3= 100.
DEBUG (4): temppkt->n4= 100.
DEBUG (4): temppkt->n5= 100.
DEBUG (4): temppkt->n6= 100.
DEBUG (4): m5-4= 0.476692.
DEBUG (4): n5-4= 0.507591.
DEBUG (4): a5-4= 31233.
DEBUG (4): b5-4= 33259.
DEBUG (16): packet received from 29.
DEBUG (16): r172916= 0.
DEBUG (16): r1716= 0.
DEBUG (16): r2916= 0.
DEBUG (16): s16[0]= 0.000000.
DEBUG (16): s16[1]= 1.000000.
DEBUG (16): s16[2]= 0.000000.
DEBUG (16): s16[3]= 0.541700.
DEBUG (16): ws1= 4.
DEBUG (16): ws2= 4.
DEBUG (16): wa2= 0.389800.
DEBUG (16): wb2= 0.536100.
DEBUG (16): temppkt->n1= 7.
DEBUG (16): temppkt->n2= 4.
DEBUG (16): temppkt->n3= 100.
DEBUG (16): temppkt->n4= 100.
DEBUG (16): temppkt->n5= 100.
DEBUG (16): temppkt->n6= 100.
DEBUG (16): m29-16= 0.389899.
DEBUG (16): n29-16= 0.536154.
DEBUG (16): a29-16= 25545.
DEBUG (16): b29-16= 35133.
DEBUG (28): packet received from 29.
DEBUG (28): r293928= 0.
DEBUG (28): r2928= 0.
DEBUG (28): r3928= 0.
DEBUG (28): s28[0]= 0.541700.
DEBUG (28): s28[1]= 1.000000.
DEBUG (28): s28[2]= 0.000000.
DEBUG (28): s28[3]= 0.464300.
DEBUG (28): ws1= 4.
DEBUG (28): ws2= 4.
DEBUG (28): wa2= 0.536100.
DEBUG (28): wb2= 0.659800.
DEBUG (28): temppkt->n1= 7.
DEBUG (28): temppkt->n2= 4.
DEBUG (28): temppkt->n3= 100.
DEBUG (28): temppkt->n4= 100.
DEBUG (28): temppkt->n5= 100.
DEBUG (28): temppkt->n6= 100.
DEBUG (28): m29-28= 0.536154.
DEBUG (28): n29-28= 0.659892.
DEBUG (28): a29-28= 35133.
DEBUG (28): b29-28= 43239.
DEBUG (1): packet received from 3.
DEBUG (1): r341= 0.
DEBUG (1): r31= 0.
DEBUG (1): r41= 0.
DEBUG (1): s1[0]= 0.000000.
DEBUG (1): s1[1]= 1.000000.
DEBUG (1): s1[2]= 0.000000.
DEBUG (1): s1[3]= 1.000000.
DEBUG (1): ws1= 4.
DEBUG (1): ws2= 4.
DEBUG (1): wa2= 0.491800.
DEBUG (1): wb2= 0.678300.
DEBUG (1): temppkt->n1= 5.
DEBUG (1): temppkt->n2= 100.
DEBUG (1): temppkt->n3= 100.
DEBUG (1): temppkt->n4= 100.
DEBUG (1): temppkt->n5= 100.
DEBUG (1): temppkt->n6= 100.
DEBUG (1): m3-1= 0.491890.
DEBUG (1): n3-1= 0.678386.
DEBUG (1): a3-1= 32230.
DEBUG (1): b3-1= 44452.
DEBUG (30): packet received from 31.
DEBUG (30): r314130= 0.
DEBUG (30): r3130= 0.
DEBUG (30): r4130= 0.
DEBUG (30): s30[0]= 0.000000.
DEBUG (30): s30[1]= 0.400000.
DEBUG (30): s30[2]= 0.000000.
DEBUG (30): s30[3]= 0.473700.
DEBUG (30): ws1= 4.
DEBUG (30): ws2= 4.
DEBUG (30): wa2= 0.409900.
DEBUG (30): wb2= 0.597900.
DEBUG (30): temppkt->n1= 7.
DEBUG (30): temppkt->n2= 5.
DEBUG (30): temppkt->n3= 100.
DEBUG (30): temppkt->n4= 100.
DEBUG (30): temppkt->n5= 100.
DEBUG (30): temppkt->n6= 100.
DEBUG (30): m31-30= 0.409995.
DEBUG (30): n31-30= 0.597992.
DEBUG (30): a31-30= 26862.
DEBUG (30): b31-30= 39183.
DEBUG (8): packet received from 21.
DEBUG (8): r218= 0.
DEBUG (8): ws1= 4.
DEBUG (8): ws2= 4.
DEBUG (8): wa2= 0.553700.
DEBUG (8): wb2= 0.609600.
DEBUG (8): temppkt->n1= 9.
DEBUG (8): temppkt->n2= 100.
DEBUG (8): temppkt->n3= 100.
DEBUG (8): temppkt->n4= 100.
DEBUG (8): temppkt->n5= 100.
DEBUG (8): temppkt->n6= 100.
DEBUG (8): m21-8= 0.553796.
DEBUG (8): n21-8= 0.609689.
DEBUG (8): a21-8= 36286.
DEBUG (8): b21-8= 39950.
DEBUG (9): packet received from 43.
DEBUG (9): r439= 0.
DEBUG (9): ws1= 4.
DEBUG (9): ws2= 4.
DEBUG (9): wa2= 0.667700.
DEBUG (9): wb2= 0.733700.
DEBUG (9): temppkt->n1= 9.
DEBUG (9): temppkt->n2= 100.
DEBUG (9): temppkt->n3= 100.
DEBUG (9): temppkt->n4= 100.
DEBUG (9): temppkt->n5= 100.
DEBUG (9): temppkt->n6= 100.
DEBUG (9): m43-9= 0.667796.
DEBUG (9): n43-9= 0.733791.
DEBUG (9): a43-9= 43757.
DEBUG (9): b43-9= 48083.
DEBUG (3): packet received from 7.
DEBUG (3): r73= 0.
DEBUG (3): ws1= 3.
DEBUG (3): ws2= 4.
DEBUG (3): wa2= 0.081500.
DEBUG (3): wb2= 0.103500.
DEBUG (3): temppkt->n1= 8.
DEBUG (3): temppkt->n2= 100.
DEBUG (3): temppkt->n3= 100.
DEBUG (3): temppkt->n4= 100.
DEBUG (3): temppkt->n5= 100.
DEBUG (3): temppkt->n6= 100.
DEBUG (3): m7-3= 0.081590.
DEBUG (3): n7-3= 0.103581.
DEBUG (3): a7-3= 5341.
DEBUG (3): b7-3= 6782.
DEBUG (4): packet received from 7.
DEBUG (4): r5784= 0.
DEBUG (4): r54= 0.
DEBUG (4): r74= 0.
DEBUG (4): r84= 0.
DEBUG (4): s4[0]= 0.000000.
DEBUG (4): s4[1]= 1.000000.
DEBUG (4): s4[2]= 0.548400.
DEBUG (4): s4[3]= 1.000000.
DEBUG (4): s4[4]= 0.000000.
DEBUG (4): s4[5]= 0.409100.
DEBUG (4): ws1= 4.
DEBUG (4): ws2= 4.
DEBUG (4): temppkt2= 1.
DEBUG (4): wa1= 350.
DEBUG (4): wb1= 2160.
DEBUG (4): wa2= 0.035000.
DEBUG (4): wb2= 0.216000.
DEBUG (4): temppkt->n1= 8.
DEBUG (4): temppkt->n2= 1.
DEBUG (4): temppkt->n3= 100.
DEBUG (4): temppkt->n4= 100.
DEBUG (4): temppkt->n5= 100.
DEBUG (4): temppkt->n6= 100.
DEBUG (4): m7-4= 0.103581.
DEBUG (4): n7-4= 0.121691.
DEBUG (4): a7-4= 2293.
DEBUG (4): b7-4= 14155.
DEBUG (11): packet received from 12.
DEBUG (11): r1211= 0.
DEBUG (11): ws1= 4.
DEBUG (11): ws2= 4.
DEBUG (11): wa2= 0.369500.
DEBUG (11): wb2= 0.658700.
DEBUG (11): temppkt->n1= 7.
DEBUG (11): temppkt->n2= 2.
DEBUG (11): temppkt->n3= 100.
DEBUG (11): temppkt->n4= 100.
DEBUG (11): temppkt->n5= 100.
DEBUG (11): temppkt->n6= 100.
DEBUG (11): m12-11= 0.369589.
DEBUG (11): n12-11= 0.658793.
DEBUG (11): a12-11= 24215.
DEBUG (11): b12-11= 43167.
DEBUG (45): packet received from 46.
DEBUG (45): r4645= 0.
DEBUG (45): ws1= 4.
DEBUG (45): ws2= 5.
DEBUG (45): wa2= 0.998300.
DEBUG (45): wb2= 1.000000.
DEBUG (45): temppkt->n1= 100.
DEBUG (45): temppkt->n2= 100.
DEBUG (45): temppkt->n3= 100.
DEBUG (45): temppkt->n4= 100.
DEBUG (45): temppkt->n5= 100.
DEBUG (45): temppkt->n6= 100.
DEBUG (45): m46-45= 0.998397.
DEBUG (45): n46-45= 1.000000.
DEBUG (45): a46-45= 65423.
DEBUG (45): b46-45= 65535.
DEBUG (34): packet received from 46.
DEBUG (34): r354634= 0.
DEBUG (34): r3534= 0.
DEBUG (34): r4634= 0.
DEBUG (34): s34[0]= 0.448300.
DEBUG (34): s34[1]= 1.000000.
DEBUG (34): s34[2]= 0.000000.
DEBUG (34): s34[3]= 0.466700.
DEBUG (34): ws1= 4.
DEBUG (34): ws2= 4.
DEBUG (34): temppkt1= 9.
DEBUG (34): wa1= 9690.
DEBUG (34): wb1= 9830.
DEBUG (34): temppkt2= 9.
DEBUG (34): wa1= 6900.
DEBUG (34): wb1= 8300.
DEBUG (34): wa2= 0.690000.
DEBUG (34): wb2= 0.830000.
DEBUG (34): temppkt->n1= 9.
DEBUG (34): temppkt->n2= 9.
DEBUG (34): temppkt->n3= 100.
DEBUG (34): temppkt->n4= 100.
DEBUG (34): temppkt->n5= 100.
DEBUG (34): temppkt->n6= 100.
DEBUG (34): m46-34= 0.996994.
DEBUG (34): n46-34= 0.998397.
DEBUG (34): a46-34= 45219.
DEBUG (34): b46-34= 54394.
DEBUG (16): packet received from 17.
DEBUG (16): r172916= 0.
DEBUG (16): r1716= 0.
DEBUG (16): r2916= 0.
DEBUG (16): s16[0]= 0.000000.
DEBUG (16): s16[1]= 1.000000.
DEBUG (16): s16[2]= 0.000000.
DEBUG (16): s16[3]= 0.541700.
DEBUG (16): ws1= 3.
DEBUG (16): ws2= 4.
DEBUG (16): wa2= 0.049700.
DEBUG (16): wb2= 0.409700.
DEBUG (16): temppkt->n1= 7.
DEBUG (16): temppkt->n2= 5.
DEBUG (16): temppkt->n3= 100.
DEBUG (16): temppkt->n4= 100.
DEBUG (16): temppkt->n5= 100.
DEBUG (16): temppkt->n6= 100.
DEBUG (16): m17-16= 0.049790.
DEBUG (16): n17-16= 0.409796.
DEBUG (16): a17-16= 3257.
DEBUG (16): b17-16= 26849.
DEBUG (24): packet received from 25.
DEBUG (24): r253524= 0.
DEBUG (24): r2524= 0.
DEBUG (24): r3524= 0.
DEBUG (24): s24[0]= 0.511600.
DEBUG (24): s24[1]= 1.000000.
DEBUG (24): s24[2]= 0.000000.
DEBUG (24): s24[3]= 0.448300.
DEBUG (24): ws1= 4.
DEBUG (24): ws2= 4.
DEBUG (24): wa2= 0.377400.
DEBUG (24): wb2= 0.425700.
DEBUG (24): temppkt->n1= 9.
DEBUG (24): temppkt->n2= 9.
DEBUG (24): temppkt->n3= 100.
DEBUG (24): temppkt->n4= 100.
DEBUG (24): temppkt->n5= 100.
DEBUG (24): temppkt->n6= 100.
DEBUG (24): m25-24= 0.377436.
DEBUG (24): n25-24= 0.425788.
DEBUG (24): a25-24= 24732.
DEBUG (24): b25-24= 27898.
DEBUG (1): packet received from 4.
DEBUG (1): r341= 0.
DEBUG (1): r31= 0.
DEBUG (1): r41= 0.
DEBUG (1): s1[0]= 0.000000.
DEBUG (1): s1[1]= 1.000000.
DEBUG (1): s1[2]= 0.000000.
DEBUG (1): s1[3]= 1.000000.
DEBUG (1): ws1= 3.
DEBUG (1): ws2= 4.
DEBUG (1): wa2= 0.034900.
DEBUG (1): wb2= 0.215900.
DEBUG (1): temppkt->n1= 8.
DEBUG (1): temppkt->n2= 1.
DEBUG (1): temppkt->n3= 100.
DEBUG (1): temppkt->n4= 100.
DEBUG (1): temppkt->n5= 100.
DEBUG (1): temppkt->n6= 100.
DEBUG (1): m4-1= 0.034989.
DEBUG (1): n4-1= 0.215991.
DEBUG (1): a4-1= 2287.
DEBUG (1): b4-1= 14149.
DEBUG (35): packet received from 36.
DEBUG (35): r3635= 0.
DEBUG (35): ws1= 4.
DEBUG (35): ws2= 4.
DEBUG (35): wa2= 0.425800.
DEBUG (35): wb2= 0.519600.
DEBUG (35): temppkt->n1= 9.
DEBUG (35): temppkt->n2= 9.
DEBUG (35): temppkt->n3= 100.
DEBUG (35): temppkt->n4= 100.
DEBUG (35): temppkt->n5= 100.
DEBUG (35): temppkt->n6= 100.
DEBUG (35): m36-35= 0.425895.
DEBUG (35): n36-35= 0.519692.
DEBUG (35): a36-35= 27904.
DEBUG (35): b36-35= 34051.
DEBUG (27): packet received from 28.
DEBUG (27): r2827= 0.
DEBUG (27): ws1= 4.
DEBUG (27): ws2= 4.
DEBUG (27): wa2= 0.536000.
DEBUG (27): wb2= 0.659700.
DEBUG (27): temppkt->n1= 7.
DEBUG (27): temppkt->n2= 4.
DEBUG (27): temppkt->n3= 100.
DEBUG (27): temppkt->n4= 100.
DEBUG (27): temppkt->n5= 100.
DEBUG (27): temppkt->n6= 100.
DEBUG (27): m28-27= 0.536095.
DEBUG (27): n28-27= 0.659785.
DEBUG (27): a28-27= 35126.
DEBUG (27): b28-27= 43233.
DEBUG (29): packet received from 30.
DEBUG (29): r3029= 0.
DEBUG (29): ws1= 4.
DEBUG (29): ws2= 4.
DEBUG (29): wa2= 0.409800.
DEBUG (29): wb2= 0.597800.
DEBUG (29): temppkt->n1= 7.
DEBUG (29): temppkt->n2= 5.
DEBUG (29): temppkt->n3= 100.
DEBUG (29): temppkt->n4= 100.
DEBUG (29): temppkt->n5= 100.
DEBUG (29): temppkt->n6= 100.
DEBUG (29): m30-29= 0.409888.
DEBUG (29): n30-29= 0.597894.
DEBUG (29): a30-29= 26856.
DEBUG (29): b30-29= 39176.
DEBUG (10): packet received from 11.
DEBUG (10): r112310= 0.
DEBUG (10): r1110= 0.
DEBUG (10): r2310= 0.
DEBUG (10): s10[0]= 0.000000.
DEBUG (10): s10[1]= 1.000000.
DEBUG (10): s10[2]= 0.000000.
DEBUG (10): s10[3]= 0.485700.
DEBUG (10): ws1= 4.
DEBUG (10): ws2= 4.
DEBUG (10): wa2= 0.369400.
DEBUG (10): wb2= 0.658600.
DEBUG (10): temppkt->n1= 7.
DEBUG (10): temppkt->n2= 2.
DEBUG (10): temppkt->n3= 100.
DEBUG (10): temppkt->n4= 100.
DEBUG (10): temppkt->n5= 100.
DEBUG (10): temppkt->n6= 100.
DEBUG (10): m11-10= 0.369497.
DEBUG (10): n11-10= 0.658686.
DEBUG (10): a11-10= 24208.
DEBUG (10): b11-10= 43161.
DEBUG (1): packet received from 3.
DEBUG (1): r341= 0.
DEBUG (1): r31= 0.
DEBUG (1): r41= 0.
DEBUG (1): s1[0]= 0.000000.
DEBUG (1): s1[1]= 1.000000.
DEBUG (1): s1[2]= 0.000000.
DEBUG (1): s1[3]= 1.000000.
DEBUG (1): ws1= 3.
DEBUG (1): ws2= 4.
DEBUG (1): wa2= 0.081400.
DEBUG (1): wb2= 0.103400.
DEBUG (1): temppkt->n1= 8.
DEBUG (1): temppkt->n2= 100.
DEBUG (1): temppkt->n3= 100.
DEBUG (1): temppkt->n4= 100.
DEBUG (1): temppkt->n5= 100.
DEBUG (1): temppkt->n6= 100.
DEBUG (1): m3-1= 0.081498.
DEBUG (1): n3-1= 0.103487.
DEBUG (1): a3-1= 5334.
DEBUG (1): b3-1= 6776.
DEBUG (43): packet received from 33.
DEBUG (43): r334443= 0.
DEBUG (43): r3343= 0.
DEBUG (43): r4443= 0.
DEBUG (43): s43[0]= 0.561000.
DEBUG (43): s43[1]= 1.000000.
DEBUG (43): s43[2]= 0.000000.
DEBUG (43): s43[3]= 1.000000.
DEBUG (43): ws1= 4.
DEBUG (43): ws2= 4.
DEBUG (43): temppkt2= 1.
DEBUG (43): wa1= 7570.
DEBUG (43): wb1= 2180.
DEBUG (43): wa2= 0.757000.
DEBUG (43): wb2= 0.218000.
DEBUG (43): temppkt->n1= 8.
DEBUG (43): temppkt->n2= 1.
DEBUG (43): temppkt->n3= 100.
DEBUG (43): temppkt->n4= 100.
DEBUG (43): temppkt->n5= 100.
DEBUG (43): temppkt->n6= 100.
DEBUG (43): m33-43= 0.175751.
DEBUG (43): n33-43= 0.121889.
DEBUG (43): a33-43= 49609.
DEBUG (43): b33-43= 14286.
DEBUG (22): packet received from 33.
DEBUG (22): r233322= 0.
DEBUG (22): r2322= 0.
DEBUG (22): r3322= 0.
DEBUG (22): s22[0]= 0.485700.
DEBUG (22): s22[1]= 1.000000.
DEBUG (22): s22[2]= 0.000000.
DEBUG (22): s22[3]= 0.561000.
DEBUG (22): ws1= 4.
DEBUG (22): ws2= 4.
DEBUG (22): temppkt2= 1.
DEBUG (22): wa1= 2180.
DEBUG (22): wb1= 7570.
DEBUG (22): wa2= 0.218000.
DEBUG (22): wb2= 0.757000.
DEBUG (22): temppkt->n1= 8.
DEBUG (22): temppkt->n2= 1.
DEBUG (22): temppkt->n3= 100.
DEBUG (22): temppkt->n4= 100.
DEBUG (22): temppkt->n5= 100.
DEBUG (22): temppkt->n6= 100.
DEBUG (22): m33-22= 0.121889.
DEBUG (22): n33-22= 0.175751.
DEBUG (22): a33-22= 14286.
DEBUG (22): b33-22= 49609.
DEBUG (28): packet received from 29.
DEBUG (28): r293928= 0.
DEBUG (28): r2928= 0.
DEBUG (28): r3928= 0.
DEBUG (28): s28[0]= 0.541700.
DEBUG (28): s28[1]= 1.000000.
DEBUG (28): s28[2]= 0.000000.
DEBUG (28): s28[3]= 0.464300.
DEBUG (28): ws1= 4.
DEBUG (28): ws2= 4.
DEBUG (28): temppkt3= 5.
DEBUG (28): wa1= 1160.
DEBUG (28): wb1= 9770.
DEBUG (28): wa2= 0.116000.
DEBUG (28): wb2= 0.977000.
DEBUG (28): temppkt->n1= 7.
DEBUG (28): temppkt->n2= 5.
DEBUG (28): temppkt->n3= 5.
DEBUG (28): temppkt->n4= 100.
DEBUG (28): temppkt->n5= 100.
DEBUG (28): temppkt->n6= 100.
DEBUG (28): m29-28= 0.511631.
DEBUG (28): n29-28= 0.597787.
DEBUG (28): a29-28= 7602.
DEBUG (28): b29-28= 64027.
DEBUG (16): packet received from 29.
DEBUG (16): r172916= 0.
DEBUG (16): r1716= 0.
DEBUG (16): r2916= 0.
DEBUG (16): s16[0]= 0.000000.
DEBUG (16): s16[1]= 1.000000.
DEBUG (16): s16[2]= 0.000000.
DEBUG (16): s16[3]= 0.541700.
DEBUG (16): ws1= 4.
DEBUG (16): ws2= 4.
DEBUG (16): wa2= 0.409700.
DEBUG (16): wb2= 0.511600.
DEBUG (16): temppkt->n1= 7.
DEBUG (16): temppkt->n2= 5.
DEBUG (16): temppkt->n3= 100.
DEBUG (16): temppkt->n4= 100.
DEBUG (16): temppkt->n5= 100.
DEBUG (16): temppkt->n6= 100.
DEBUG (16): m29-16= 0.409796.
DEBUG (16): n29-16= 0.511631.
DEBUG (16): a29-16= 26849.
DEBUG (16): b29-16= 33527.
DEBUG (26): packet received from 27.
DEBUG (26): r273726= 0.
DEBUG (26): r2726= 0.
DEBUG (26): r3726= 0.
DEBUG (26): s26[0]= 0.545500.
DEBUG (26): s26[1]= 1.000000.
DEBUG (26): s26[2]= 0.000000.
DEBUG (26): s26[3]= 0.513500.
DEBUG (26): ws1= 4.
DEBUG (26): ws2= 4.
DEBUG (26): temppkt3= 6.
DEBUG (26): wa1= 340.
DEBUG (26): wb1= 5960.
DEBUG (26): wa2= 0.034000.
DEBUG (26): wb2= 0.596000.
DEBUG (26): temppkt->n1= 7.
DEBUG (26): temppkt->n2= 4.
DEBUG (26): temppkt->n3= 6.
DEBUG (26): temppkt->n4= 100.
DEBUG (26): temppkt->n5= 100.
DEBUG (26): temppkt->n6= 100.
DEBUG (26): m27-26= 0.603469.
DEBUG (26): n27-26= 0.659693.
DEBUG (26): a27-26= 2228.
DEBUG (26): b27-26= 39058.
DEBUG (14): packet received from 27.
DEBUG (14): r152714= 0.
DEBUG (14): r1514= 0.
DEBUG (14): r2714= 0.
DEBUG (14): s14[0]= 0.000000.
DEBUG (14): s14[1]= 1.000000.
DEBUG (14): s14[2]= 0.000000.
DEBUG (14): s14[3]= 0.545500.
DEBUG (14): ws1= 4.
DEBUG (14): ws2= 4.
DEBUG (14): wa2= 0.535900.
DEBUG (14): wb2= 0.603400.
DEBUG (14): temppkt->n1= 7.
DEBUG (14): temppkt->n2= 4.
DEBUG (14): temppkt->n3= 100.
DEBUG (14): temppkt->n4= 100.
DEBUG (14): temppkt->n5= 100.
DEBUG (14): temppkt->n6= 100.
DEBUG (14): m27-14= 0.535988.
DEBUG (14): n27-14= 0.603469.
DEBUG (14): a27-14= 35120.
DEBUG (14): b27-14= 39543.
DEBUG (15): packet received from 16.
DEBUG (15): r1615= 0.
DEBUG (15): ws1= 4.
DEBUG (15): ws2= 4.
DEBUG (15): wa2= 0.409600.
DEBUG (15): wb2= 0.511500.
DEBUG (15): temppkt->n1= 7.
DEBUG (15): temppkt->n2= 5.
DEBUG (15): temppkt->n3= 100.
DEBUG (15): temppkt->n4= 100.
DEBUG (15): temppkt->n5= 100.
DEBUG (15): temppkt->n6= 100.
DEBUG (15): m16-15= 0.409689.
DEBUG (15): n16-15= 0.511589.
DEBUG (15): a16-15= 26843.
DEBUG (15): b16-15= 33521.
DEBUG (12): packet received from 13.
DEBUG (12): r132512= 0.
DEBUG (12): r1312= 0.
DEBUG (12): r2512= 0.
DEBUG (12): s12[0]= 0.000000.
DEBUG (12): s12[1]= 1.000000.
DEBUG (12): s12[2]= 0.000000.
DEBUG (12): s12[3]= 0.511600.
DEBUG (12): ws1= 4.
DEBUG (12): ws2= 4.
DEBUG (12): wa2= 0.720400.
DEBUG (12): wb2= 0.830400.
DEBUG (12): temppkt->n1= 9.
DEBUG (12): temppkt->n2= 100.
DEBUG (12): temppkt->n3= 100.
DEBUG (12): temppkt->n4= 100.
DEBUG (12): temppkt->n5= 100.
DEBUG (12): temppkt->n6= 100.
DEBUG (12): m13-12= 0.720485.
DEBUG (12): n13-12= 0.830488.
DEBUG (12): a13-12= 47211.
DEBUG (12): b13-12= 54420.
DEBUG (44): packet received from 45.
DEBUG (44): r4544= 0.
DEBUG (44): ws1= 4.
DEBUG (44): ws2= 5.
DEBUG (44): wa2= 0.998200.
DEBUG (44): wb2= 1.000000.
DEBUG (44): temppkt->n1= 100.
DEBUG (44): temppkt->n2= 100.
DEBUG (44): temppkt->n3= 100.
DEBUG (44): temppkt->n4= 100.
DEBUG (44): temppkt->n5= 100.
DEBUG (44): temppkt->n6= 100.
DEBUG (44): m45-44= 0.998291.
DEBUG (44): n45-44= 1.000000.
DEBUG (44): a45-44= 65417.
DEBUG (44): b45-44= 65535.
DEBUG (6): packet received from 9.
DEBUG (6): r96= 0.
DEBUG (6): ws1= 4.
DEBUG (6): ws2= 4.
DEBUG (6): wa2= 0.682900.
DEBUG (6): wb2= 0.705900.
DEBUG (6): temppkt->n1= 9.
DEBUG (6): temppkt->n2= 100.
DEBUG (6): temppkt->n3= 100.
DEBUG (6): temppkt->n4= 100.
DEBUG (6): temppkt->n5= 100.
DEBUG (6): temppkt->n6= 100.
DEBUG (6): m9-6= 0.682997.
DEBUG (6): n9-6= 0.705955.
DEBUG (6): a9-6= 44753.
DEBUG (6): b9-6= 46261.
DEBUG (4): packet received from 8.
DEBUG (4): r5784= 0.
DEBUG (4): r54= 0.
DEBUG (4): r74= 0.
DEBUG (4): r84= 0.
DEBUG (4): s4[0]= 0.000000.
DEBUG (4): s4[1]= 1.000000.
DEBUG (4): s4[2]= 0.548400.
DEBUG (4): s4[3]= 1.000000.
DEBUG (4): s4[4]= 0.000000.
DEBUG (4): s4[5]= 0.409100.
DEBUG (4): ws1= 4.
DEBUG (4): ws2= 4.
DEBUG (4): temppkt2= 5.
DEBUG (4): wa1= 5360.
DEBUG (4): wb1= 7650.
DEBUG (4): wa2= 0.536000.
DEBUG (4): wb2= 0.765000.
DEBUG (4): temppkt->n1= 9.
DEBUG (4): temppkt->n2= 5.
DEBUG (4): temppkt->n3= 100.
DEBUG (4): temppkt->n4= 100.
DEBUG (4): temppkt->n5= 100.
DEBUG (4): temppkt->n6= 100.
DEBUG (4): m8-4= 0.553689.
DEBUG (4): n8-4= 0.576561.
DEBUG (4): a8-4= 35126.
DEBUG (4): b8-4= 50134.
DEBUG (7): packet received from 22.
DEBUG (7): r10227= 0.
DEBUG (7): r107= 0.
DEBUG (7): r227= 0.
DEBUG (7): s7[0]= 0.000000.
DEBUG (7): s7[1]= 1.000000.
DEBUG (7): s7[2]= 0.000000.
DEBUG (7): s7[3]= 1.000000.
DEBUG (7): ws1= 4.
DEBUG (7): ws2= 4.
DEBUG (7): wa2= 0.217900.
DEBUG (7): wb2= 0.756900.
DEBUG (7): temppkt->n1= 8.
DEBUG (7): temppkt->n2= 1.
DEBUG (7): temppkt->n3= 100.
DEBUG (7): temppkt->n4= 100.
DEBUG (7): temppkt->n5= 100.
DEBUG (7): temppkt->n6= 100.
DEBUG (7): m22-7= 0.217990.
DEBUG (7): n22-7= 0.756985.
DEBUG (7): a22-7= 14280.
DEBUG (7): b22-7= 49603.
DEBUG (34): packet received from 35.
DEBUG (34): r354634= 0.
DEBUG (34): r3534= 0.
DEBUG (34): r4634= 0.
DEBUG (34): s34[0]= 0.448300.
DEBUG (34): s34[1]= 1.000000.
DEBUG (34): s34[2]= 0.000000.
DEBUG (34): s34[3]= 0.466700.
DEBUG (34): ws1= 4.
DEBUG (34): ws2= 4.
DEBUG (34): wa2= 0.467800.
DEBUG (34): wb2= 0.519500.
DEBUG (34): temppkt->n1= 9.
DEBUG (34): temppkt->n2= 9.
DEBUG (34): temppkt->n3= 100.
DEBUG (34): temppkt->n4= 100.
DEBUG (34): temppkt->n5= 100.
DEBUG (34): temppkt->n6= 100.
DEBUG (34): m35-34= 0.467837.
DEBUG (34): n35-34= 0.519585.
DEBUG (34): a35-34= 30657.
DEBUG (34): b35-34= 34045.
DEBUG (24): packet received from 35.
DEBUG (24): r253524= 0.
DEBUG (24): r2524= 0.
DEBUG (24): r3524= 0.
DEBUG (24): s24[0]= 0.511600.
DEBUG (24): s24[1]= 1.000000.
DEBUG (24): s24[2]= 0.000000.
DEBUG (24): s24[3]= 0.448300.
DEBUG (24): ws1= 4.
DEBUG (24): ws2= 4.
DEBUG (24): temppkt3= 4.
DEBUG (24): wa1= 2570.
DEBUG (24): wb1= 6780.
DEBUG (24): wa2= 0.257000.
DEBUG (24): wb2= 0.678000.
DEBUG (24): temppkt->n1= 9.
DEBUG (24): temppkt->n2= 9.
DEBUG (24): temppkt->n3= 4.
DEBUG (24): temppkt->n4= 100.
DEBUG (24): temppkt->n5= 100.
DEBUG (24): temppkt->n6= 100.
DEBUG (24): m35-24= 0.425788.
DEBUG (24): n35-24= 0.467837.
DEBUG (24): a35-24= 16842.
DEBUG (24): b35-24= 44432.
DEBUG (14): packet received from 15.
DEBUG (14): r152714= 0.
DEBUG (14): r1514= 0.
DEBUG (14): r2714= 0.
DEBUG (14): s14[0]= 0.000000.
DEBUG (14): s14[1]= 1.000000.
DEBUG (14): s14[2]= 0.000000.
DEBUG (14): s14[3]= 0.545500.
DEBUG (14): ws1= 4.
DEBUG (14): ws2= 4.
DEBUG (14): wa2= 0.409500.
DEBUG (14): wb2= 0.511400.
DEBUG (14): temppkt->n1= 7.
DEBUG (14): temppkt->n2= 5.
DEBUG (14): temppkt->n3= 100.
DEBUG (14): temppkt->n4= 100.
DEBUG (14): temppkt->n5= 100.
DEBUG (14): temppkt->n6= 100.
DEBUG (14): m15-14= 0.409598.
DEBUG (14): n15-14= 0.511498.
DEBUG (14): a15-14= 26836.
DEBUG (14): b15-14= 33514.
DEBUG (9): packet received from 43.
DEBUG (9): r439= 0.
DEBUG (9): ws1= 4.
DEBUG (9): ws2= 4.
DEBUG (9): wa2= 0.756900.
DEBUG (9): wb2= 0.217900.
DEBUG (9): temppkt->n1= 8.
DEBUG (9): temppkt->n2= 1.
DEBUG (9): temppkt->n3= 100.
DEBUG (9): temppkt->n4= 100.
DEBUG (9): temppkt->n5= 100.
DEBUG (9): temppkt->n6= 100.
DEBUG (9): m43-9= 0.756985.
DEBUG (9): n43-9= 0.217990.
DEBUG (9): a43-9= 49603.
DEBUG (9): b43-9= 14280.
DEBUG (7): packet received from 10.
DEBUG (7): r10227= 0.
DEBUG (7): r107= 0.
DEBUG (7): r227= 0.
DEBUG (7): s7[0]= 0.000000.
DEBUG (7): s7[1]= 1.000000.
DEBUG (7): s7[2]= 0.000000.
DEBUG (7): s7[3]= 1.000000.
DEBUG (7): ws1= 4.
DEBUG (7): ws2= 4.
DEBUG (7): wa2= 0.369300.
DEBUG (7): wb2= 0.658500.
DEBUG (7): temppkt->n1= 7.
DEBUG (7): temppkt->n2= 2.
DEBUG (7): temppkt->n3= 100.
DEBUG (7): temppkt->n4= 100.
DEBUG (7): temppkt->n5= 100.
DEBUG (7): temppkt->n6= 100.
DEBUG (7): m10-7= 0.369390.
DEBUG (7): n10-7= 0.658595.
DEBUG (7): a10-7= 24202.
DEBUG (7): b10-7= 43154.
DEBUG (23): packet received from 24.
DEBUG (23): r2423= 0.
DEBUG (23): ws1= 4.
DEBUG (23): ws2= 4.
DEBUG (23): wa2= 0.256900.
DEBUG (23): wb2= 0.677900.
DEBUG (23): temppkt->n1= 9.
DEBUG (23): temppkt->n2= 9.
DEBUG (23): temppkt->n3= 4.
DEBUG (23): temppkt->n4= 100.
DEBUG (23): temppkt->n5= 100.
DEBUG (23): temppkt->n6= 100.
DEBUG (23): m24-23= 0.256992.
DEBUG (23): n24-23= 0.677989.
DEBUG (23): a24-23= 16835.
DEBUG (23): b24-23= 44426.
DEBUG (25): packet received from 26.
DEBUG (25): r2625= 0.
DEBUG (25): ws1= 3.
DEBUG (25): ws2= 4.
DEBUG (25): wa2= 0.033900.
DEBUG (25): wb2= 0.595900.
DEBUG (25): temppkt->n1= 7.
DEBUG (25): temppkt->n2= 4.
DEBUG (25): temppkt->n3= 6.
DEBUG (25): temppkt->n4= 100.
DEBUG (25): temppkt->n5= 100.
DEBUG (25): temppkt->n6= 100.
DEBUG (25): m26-25= 0.033997.
DEBUG (25): n26-25= 0.595987.
DEBUG (25): a26-25= 2221.
DEBUG (25): b26-25= 39052.
DEBUG (33): packet received from 34.
DEBUG (33): r3433= 0.
DEBUG (33): ws1= 4.
DEBUG (33): ws2= 4.
DEBUG (33): wa2= 0.467700.
DEBUG (33): wb2= 0.519400.
DEBUG (33): temppkt->n1= 9.
DEBUG (33): temppkt->n2= 9.
DEBUG (33): temppkt->n3= 100.
DEBUG (33): temppkt->n4= 100.
DEBUG (33): temppkt->n5= 100.
DEBUG (33): temppkt->n6= 100.
DEBUG (33): m34-33= 0.467796.
DEBUG (33): n34-33= 0.519493.
DEBUG (33): a34-33= 30650.
DEBUG (33): b34-33= 34038.
DEBUG (22): packet received from 23.
DEBUG (22): r233322= 0.
DEBUG (22): r2322= 0.
DEBUG (22): r3322= 0.
DEBUG (22): s22[0]= 0.485700.
DEBUG (22): s22[1]= 1.000000.
DEBUG (22): s22[2]= 0.000000.
DEBUG (22): s22[3]= 0.561000.
DEBUG (22): ws1= 4.
DEBUG (22): ws2= 4.
DEBUG (22): wa2= 0.461300.
DEBUG (22): wb2= 0.677800.
DEBUG (22): temppkt->n1= 9.
DEBUG (22): temppkt->n2= 9.
DEBUG (22): temppkt->n3= 4.
DEBUG (22): temppkt->n4= 100.
DEBUG (22): temppkt->n5= 100.
DEBUG (22): temppkt->n6= 100.
DEBUG (22): m23-22= 0.461371.
DEBUG (22): n23-22= 0.677897.
DEBUG (22): a23-22= 30231.
DEBUG (22): b23-22= 44419.
DEBUG (10): packet received from 23.
DEBUG (10): r112310= 0.
DEBUG (10): r1110= 0.
DEBUG (10): r2310= 0.
DEBUG (10): s10[0]= 0.000000.
DEBUG (10): s10[1]= 1.000000.
DEBUG (10): s10[2]= 0.000000.
DEBUG (10): s10[3]= 0.485700.
DEBUG (10): ws1= 4.
DEBUG (10): ws2= 4.
DEBUG (10): wa2= 0.256800.
DEBUG (10): wb2= 0.461300.
DEBUG (10): temppkt->n1= 9.
DEBUG (10): temppkt->n2= 9.
DEBUG (10): temppkt->n3= 4.
DEBUG (10): temppkt->n4= 100.
DEBUG (10): temppkt->n5= 100.
DEBUG (10): temppkt->n6= 100.
DEBUG (10): m23-10= 0.256886.
DEBUG (10): n23-10= 0.461371.
DEBUG (10): a23-10= 16829.
DEBUG (10): b23-10= 30231.
DEBUG (27): packet received from 28.
DEBUG (27): r2827= 0.
DEBUG (27): ws1= 4.
DEBUG (27): ws2= 4.
DEBUG (27): wa2= 0.115900.
DEBUG (27): wb2= 0.976900.
DEBUG (27): temppkt->n1= 7.
DEBUG (27): temppkt->n2= 5.
DEBUG (27): temppkt->n3= 5.
DEBUG (27): temppkt->n4= 100.
DEBUG (27): temppkt->n5= 100.
DEBUG (27): temppkt->n6= 100.
DEBUG (27): m28-27= 0.115999.
DEBUG (27): n28-27= 0.976989.
DEBUG (27): a28-27= 7595.
DEBUG (27): b28-27= 64021.
DEBUG (13): packet received from 14.
DEBUG (13): r1413= 0.
DEBUG (13): ws1= 4.
DEBUG (13): ws2= 4.
DEBUG (13): wa2= 0.409400.
DEBUG (13): wb2= 0.511300.
DEBUG (13): temppkt->n1= 7.
DEBUG (13): temppkt->n2= 5.
DEBUG (13): temppkt->n3= 100.
DEBUG (13): temppkt->n4= 100.
DEBUG (13): temppkt->n5= 100.
DEBUG (13): temppkt->n6= 100.
DEBUG (13): m14-13= 0.409491.
DEBUG (13): n14-13= 0.511391.
DEBUG (13): a14-13= 26830.
DEBUG (13): b14-13= 33508.
DEBUG (43): packet received from 44.
DEBUG (43): r334443= 0.
DEBUG (43): r3343= 0.
DEBUG (43): r4443= 0.
DEBUG (43): s43[0]= 0.561000.
DEBUG (43): s43[1]= 1.000000.
DEBUG (43): s43[2]= 0.000000.
DEBUG (43): s43[3]= 1.000000.
DEBUG (43): ws1= 4.
DEBUG (43): ws2= 5.
DEBUG (43): wa2= 0.998100.
DEBUG (43): wb2= 1.000000.
DEBUG (43): temppkt->n1= 100.
DEBUG (43): temppkt->n2= 100.
DEBUG (43): temppkt->n3= 100.
DEBUG (43): temppkt->n4= 100.
DEBUG (43): temppkt->n5= 100.
DEBUG (43): temppkt->n6= 100.
DEBUG (43): m44-43= 0.998199.
DEBUG (43): n44-43= 1.000000.
DEBUG (43): a44-43= 65410.
DEBUG (43): b44-43= 65535.
DEBUG (4): packet received from 7.
DEBUG (4): r5784= 0.
DEBUG (4): r54= 0.
DEBUG (4): r74= 0.
DEBUG (4): r84= 0.
DEBUG (4): s4[0]= 0.000000.
DEBUG (4): s4[1]= 1.000000.
DEBUG (4): s4[2]= 0.548400.
DEBUG (4): s4[3]= 1.000000.
DEBUG (4): s4[4]= 0.000000.
DEBUG (4): s4[5]= 0.409100.
DEBUG (4): ws1= 4.
DEBUG (4): ws2= 4.
DEBUG (4): wa2= 0.527800.
DEBUG (4): wb2= 0.658400.
DEBUG (4): temppkt->n1= 7.
DEBUG (4): temppkt->n2= 2.
DEBUG (4): temppkt->n3= 100.
DEBUG (4): temppkt->n4= 100.
DEBUG (4): temppkt->n5= 100.
DEBUG (4): temppkt->n6= 100.
DEBUG (4): m7-4= 0.527890.
DEBUG (4): n7-4= 0.658488.
DEBUG (4): a7-4= 34589.
DEBUG (4): b7-4= 43148.
DEBUG (3): packet received from 7.
DEBUG (3): r73= 0.
DEBUG (3): ws1= 4.
DEBUG (3): ws2= 4.
DEBUG (3): wa2= 0.369200.
DEBUG (3): wb2= 0.527800.
DEBUG (3): temppkt->n1= 7.
DEBUG (3): temppkt->n2= 2.
DEBUG (3): temppkt->n3= 100.
DEBUG (3): temppkt->n4= 100.
DEBUG (3): temppkt->n5= 100.
DEBUG (3): temppkt->n6= 100.
DEBUG (3): m7-3= 0.369299.
DEBUG (3): n7-3= 0.527890.
DEBUG (3): a7-3= 24195.
DEBUG (3): b7-3= 34589.
DEBUG (24): packet received from 25.
DEBUG (24): r253524= 0.
DEBUG (24): r2524= 0.
DEBUG (24): r3524= 0.
DEBUG (24): s24[0]= 0.511600.
DEBUG (24): s24[1]= 1.000000.
DEBUG (24): s24[2]= 0.000000.
DEBUG (24): s24[3]= 0.448300.
DEBUG (24): ws1= 4.
DEBUG (24): ws2= 4.
DEBUG (24): wa2= 0.321400.
DEBUG (24): wb2= 0.595800.
DEBUG (24): temppkt->n1= 7.
DEBUG (24): temppkt->n2= 4.
DEBUG (24): temppkt->n3= 6.
DEBUG (24): temppkt->n4= 100.
DEBUG (24): temppkt->n5= 100.
DEBUG (24): temppkt->n6= 100.
DEBUG (24): m25-24= 0.321412.
DEBUG (24): n25-24= 0.595895.
DEBUG (24): a25-24= 21062.
DEBUG (24): b25-24= 39045.
DEBUG (2): packet received from 6.
DEBUG (2): r62= 0.
DEBUG (2): ws1= 4.
DEBUG (2): ws2= 4.
DEBUG (2): wa2= 0.682800.
DEBUG (2): wb2= 0.705800.
DEBUG (2): temppkt->n1= 9.
DEBUG (2): temppkt->n2= 100.
DEBUG (2): temppkt->n3= 100.
DEBUG (2): temppkt->n4= 100.
DEBUG (2): temppkt->n5= 100.
DEBUG (2): temppkt->n6= 100.
DEBUG (2): m6-2= 0.682887.
DEBUG (2): n6-2= 0.705898.
DEBUG (2): a6-2= 44747.
DEBUG (2): b6-2= 46254.
DEBUG (7): packet received from 22.
DEBUG (7): r10227= 0.
DEBUG (7): r107= 0.
DEBUG (7): r227= 0.
DEBUG (7): s7[0]= 0.000000.
DEBUG (7): s7[1]= 1.000000.
DEBUG (7): s7[2]= 0.000000.
DEBUG (7): s7[3]= 1.000000.
DEBUG (7): ws1= 4.
DEBUG (7): ws2= 4.
DEBUG (7): wa2= 0.461200.
DEBUG (7): wb2= 0.677700.
DEBUG (7): temppkt->n1= 9.
DEBUG (7): temppkt->n2= 9.
DEBUG (7): temppkt->n3= 4.
DEBUG (7): temppkt->n4= 100.
DEBUG (7): temppkt->n5= 100.
DEBUG (7): temppkt->n6= 100.
DEBUG (7): m22-7= 0.461295.
DEBUG (7): n22-7= 0.677791.
DEBUG (7): a22-7= 30224.
DEBUG (7): b22-7= 44413.
DEBUG (43): packet received from 33.
DEBUG (43): r334443= 0.
DEBUG (43): r3343= 0.
DEBUG (43): r4443= 0.
DEBUG (43): s43[0]= 0.561000.
DEBUG (43): s43[1]= 1.000000.
DEBUG (43): s43[2]= 0.000000.
DEBUG (43): s43[3]= 1.000000.
DEBUG (43): ws1= 4.
DEBUG (43): ws2= 4.
DEBUG (43): temppkt3= 4.
DEBUG (43): wa1= 9660.
DEBUG (43): wb1= 6760.
DEBUG (43): wa2= 0.966000.
DEBUG (43): wb2= 0.676000.
DEBUG (43): temppkt->n1= 9.
DEBUG (43): temppkt->n2= 9.
DEBUG (43): temppkt->n3= 4.
DEBUG (43): temppkt->n4= 100.
DEBUG (43): temppkt->n5= 100.
DEBUG (43): temppkt->n6= 100.
DEBUG (43): m33-43= 0.496691.
DEBUG (43): n33-43= 0.467689.
DEBUG (43): a33-43= 63306.
DEBUG (43): b33-43= 44301.
DEBUG (5): packet received from 9.
DEBUG (5): r895= 0.
DEBUG (5): r85= 0.
DEBUG (5): r95= 0.
DEBUG (5): s5[0]= 0.409100.
DEBUG (5): s5[1]= 1.000000.
DEBUG (5): s5[2]= 0.000000.
DEBUG (5): s5[3]= 0.231900.
DEBUG (5): ws1= 4.
DEBUG (5): ws2= 4.
DEBUG (5): wa2= 0.756800.
DEBUG (5): wb2= 0.631900.
DEBUG (5): temppkt->n1= 8.
DEBUG (5): temppkt->n2= 1.
DEBUG (5): temppkt->n3= 100.
DEBUG (5): temppkt->n4= 100.
DEBUG (5): temppkt->n5= 100.
DEBUG (5): temppkt->n6= 100.
DEBUG (5): m9-5= 0.756893.
DEBUG (5): n9-5= 0.631900.
DEBUG (5): a9-5= 49596.
DEBUG (5): b9-5= 41411.
DEBUG (21): packet received from 9.
DEBUG (21): r921= 0.
DEBUG (21): ws1= 4.
DEBUG (21): ws2= 4.
DEBUG (21): wa2= 0.444400.
DEBUG (21): wb2= 0.217800.
DEBUG (21): temppkt->n1= 8.
DEBUG (21): temppkt->n2= 1.
DEBUG (21): temppkt->n3= 100.
DEBUG (21): temppkt->n4= 100.
DEBUG (21): temppkt->n5= 100.
DEBUG (21): temppkt->n6= 100.
DEBUG (21): m9-21= 0.444438.
DEBUG (21): n9-21= 0.217899.
DEBUG (21): a9-21= 29123.
DEBUG (21): b9-21= 14273.
DEBUG (6): packet received from 9.
DEBUG (6): r96= 0.
DEBUG (6): ws1= 4.
DEBUG (6): ws2= 4.
DEBUG (6): wa2= 0.631900.
DEBUG (6): wb2= 0.444400.
DEBUG (6): temppkt->n1= 8.
DEBUG (6): temppkt->n2= 1.
DEBUG (6): temppkt->n3= 100.
DEBUG (6): temppkt->n4= 100.
DEBUG (6): temppkt->n5= 100.
DEBUG (6): temppkt->n6= 100.
DEBUG (6): m9-6= 0.631900.
DEBUG (6): n9-6= 0.444438.
DEBUG (6): a9-6= 41411.
DEBUG (6): b9-6= 29123.
DEBUG (1): packet received from 4.
DEBUG (1): r341= 0.
DEBUG (1): r31= 0.
DEBUG (1): r41= 0.
DEBUG (1): s1[0]= 0.000000.
DEBUG (1): s1[1]= 1.000000.
DEBUG (1): s1[2]= 0.000000.
DEBUG (1): s1[3]= 1.000000.
DEBUG (1): ws1= 4.
DEBUG (1): ws2= 4.
DEBUG (1): wa2= 0.527700.
DEBUG (1): wb2= 0.658300.
DEBUG (1): temppkt->n1= 7.
DEBUG (1): temppkt->n2= 2.
DEBUG (1): temppkt->n3= 100.
DEBUG (1): temppkt->n4= 100.
DEBUG (1): temppkt->n5= 100.
DEBUG (1): temppkt->n6= 100.
DEBUG (1): m4-1= 0.527794.
DEBUG (1): n4-1= 0.658396.
DEBUG (1): a4-1= 34582.
DEBUG (1): b4-1= 43141.
DEBUG (23): packet received from 24.
DEBUG (23): r2423= 0.
DEBUG (23): ws1= 4.
DEBUG (23): ws2= 4.
DEBUG (23): wa2= 0.321300.
DEBUG (23): wb2= 0.595700.
DEBUG (23): temppkt->n1= 7.
DEBUG (23): temppkt->n2= 4.
DEBUG (23): temppkt->n3= 6.
DEBUG (23): temppkt->n4= 100.
DEBUG (23): temppkt->n5= 100.
DEBUG (23): temppkt->n6= 100.
DEBUG (23): m24-23= 0.321386.
DEBUG (23): n24-23= 0.595789.
DEBUG (23): a24-23= 21056.
DEBUG (23): b24-23= 39039.
DEBUG (11): packet received from 12.
DEBUG (11): r1211= 0.
DEBUG (11): ws1= 4.
DEBUG (11): ws2= 4.
DEBUG (11): wa2= 0.720300.
DEBUG (11): wb2= 0.830300.
DEBUG (11): temppkt->n1= 9.
DEBUG (11): temppkt->n2= 100.
DEBUG (11): temppkt->n3= 100.
DEBUG (11): temppkt->n4= 100.
DEBUG (11): temppkt->n5= 100.
DEBUG (11): temppkt->n6= 100.
DEBUG (11): m12-11= 0.720394.
DEBUG (11): n12-11= 0.830396.
DEBUG (11): a12-11= 47204.
DEBUG (11): b12-11= 54413.
DEBUG (3): packet received from 7.
DEBUG (3): r73= 0.
DEBUG (3): ws1= 4.
DEBUG (3): ws2= 4.
DEBUG (3): wa2= 0.461100.
DEBUG (3): wb2= 0.579900.
DEBUG (3): temppkt->n1= 9.
DEBUG (3): temppkt->n2= 9.
DEBUG (3): temppkt->n3= 4.
DEBUG (3): temppkt->n4= 100.
DEBUG (3): temppkt->n5= 100.
DEBUG (3): temppkt->n6= 100.
DEBUG (3): m7-3= 0.461189.
DEBUG (3): n7-3= 0.579923.
DEBUG (3): a7-3= 30218.
DEBUG (3): b7-3= 38003.
DEBUG (4): packet received from 7.
DEBUG (4): r5784= 0.
DEBUG (4): r54= 0.
DEBUG (4): r74= 0.
DEBUG (4): r84= 0.
DEBUG (4): s4[0]= 0.000000.
DEBUG (4): s4[1]= 1.000000.
DEBUG (4): s4[2]= 0.548400.
DEBUG (4): s4[3]= 1.000000.
DEBUG (4): s4[4]= 0.000000.
DEBUG (4): s4[5]= 0.409100.
DEBUG (4): ws1= 4.
DEBUG (4): ws2= 4.
DEBUG (4): wa2= 0.579900.
DEBUG (4): wb2= 0.677600.
DEBUG (4): temppkt->n1= 9.
DEBUG (4): temppkt->n2= 9.
DEBUG (4): temppkt->n3= 4.
DEBUG (4): temppkt->n4= 100.
DEBUG (4): temppkt->n5= 100.
DEBUG (4): temppkt->n6= 100.
DEBUG (4): m7-4= 0.579923.
DEBUG (4): n7-4= 0.677699.
DEBUG (4): a7-4= 38003.
DEBUG (4): b7-4= 44406.
DEBUG (26): packet received from 27.
DEBUG (26): r273726= 0.
DEBUG (26): r2726= 0.
DEBUG (26): r3726= 0.
DEBUG (26): s26[0]= 0.545500.
DEBUG (26): s26[1]= 1.000000.
DEBUG (26): s26[2]= 0.000000.
DEBUG (26): s26[3]= 0.513500.
DEBUG (26): ws1= 4.
DEBUG (26): ws2= 4.
DEBUG (26): wa2= 0.585500.
DEBUG (26): wb2= 0.976800.
DEBUG (26): temppkt->n1= 7.
DEBUG (26): temppkt->n2= 5.
DEBUG (26): temppkt->n3= 5.
DEBUG (26): temppkt->n4= 100.
DEBUG (26): temppkt->n5= 100.
DEBUG (26): temppkt->n6= 100.
DEBUG (26): m27-26= 0.585571.
DEBUG (26): n27-26= 0.976898.
DEBUG (26): a27-26= 38370.
DEBUG (26): b27-26= 64014.
DEBUG (14): packet received from 27.
DEBUG (14): r152714= 0.
DEBUG (14): r1514= 0.
DEBUG (14): r2714= 0.
DEBUG (14): s14[0]= 0.000000.
DEBUG (14): s14[1]= 1.000000.
DEBUG (14): s14[2]= 0.000000.
DEBUG (14): s14[3]= 0.545500.
DEBUG (14): ws1= 4.
DEBUG (14): ws2= 4.
DEBUG (14): wa2= 0.115800.
DEBUG (14): wb2= 0.585500.
DEBUG (14): temppkt->n1= 7.
DEBUG (14): temppkt->n2= 5.
DEBUG (14): temppkt->n3= 5.
DEBUG (14): temppkt->n4= 100.
DEBUG (14): temppkt->n5= 100.
DEBUG (14): temppkt->n6= 100.
DEBUG (14): m27-14= 0.115892.
DEBUG (14): n27-14= 0.585571.
DEBUG (14): a27-14= 7588.
DEBUG (14): b27-14= 38370.
DEBUG (9): packet received from 43.
DEBUG (9): r439= 0.
DEBUG (9): ws1= 4.
DEBUG (9): ws2= 4.
DEBUG (9): wa2= 0.965900.
DEBUG (9): wb2= 0.675900.
DEBUG (9): temppkt->n1= 9.
DEBUG (9): temppkt->n2= 9.
DEBUG (9): temppkt->n3= 4.
DEBUG (9): temppkt->n4= 100.
DEBUG (9): temppkt->n5= 100.
DEBUG (9): temppkt->n6= 100.
DEBUG (9): m43-9= 0.965988.
DEBUG (9): n43-9= 0.675990.
DEBUG (9): a43-9= 63300.
DEBUG (9): b43-9= 44295.
DEBUG (22): packet received from 23.
DEBUG (22): r233322= 0.
DEBUG (22): r2322= 0.
DEBUG (22): r3322= 0.
DEBUG (22): s22[0]= 0.485700.
DEBUG (22): s22[1]= 1.000000.
DEBUG (22): s22[2]= 0.000000.
DEBUG (22): s22[3]= 0.561000.
DEBUG (22): ws1= 4.
DEBUG (22): ws2= 4.
DEBUG (22): wa2= 0.454500.
DEBUG (22): wb2= 0.595600.
DEBUG (22): temppkt->n1= 7.
DEBUG (22): temppkt->n2= 4.
DEBUG (22): temppkt->n3= 6.
DEBUG (22): temppkt->n4= 100.
DEBUG (22): temppkt->n5= 100.
DEBUG (22): temppkt->n6= 100.
DEBUG (22): m23-22= 0.454571.
DEBUG (22): n23-22= 0.595697.
DEBUG (22): a23-22= 29785.
DEBUG (22): b23-22= 39032.
DEBUG (10): packet received from 23.
DEBUG (10): r112310= 0.
DEBUG (10): r1110= 0.
DEBUG (10): r2310= 0.
DEBUG (10): s10[0]= 0.000000.
DEBUG (10): s10[1]= 1.000000.
DEBUG (10): s10[2]= 0.000000.
DEBUG (10): s10[3]= 0.485700.
DEBUG (10): ws1= 4.
DEBUG (10): ws2= 4.
DEBUG (10): wa2= 0.321200.
DEBUG (10): wb2= 0.454500.
DEBUG (10): temppkt->n1= 7.
DEBUG (10): temppkt->n2= 4.
DEBUG (10): temppkt->n3= 6.
DEBUG (10): temppkt->n4= 100.
DEBUG (10): temppkt->n5= 100.
DEBUG (10): temppkt->n6= 100.
DEBUG (10): m23-10= 0.321294.
DEBUG (10): n23-10= 0.454571.
DEBUG (10): a23-10= 21049.
DEBUG (10): b23-10= 29785.
DEBUG (25): packet received from 26.
DEBUG (25): r2625= 0.
DEBUG (25): ws1= 4.
DEBUG (25): ws2= 4.
DEBUG (25): wa2= 0.585400.
DEBUG (25): wb2= 0.976700.
DEBUG (25): temppkt->n1= 7.
DEBUG (25): temppkt->n2= 5.
DEBUG (25): temppkt->n3= 5.
DEBUG (25): temppkt->n4= 100.
DEBUG (25): temppkt->n5= 100.
DEBUG (25): temppkt->n6= 100.
DEBUG (25): m26-25= 0.585489.
DEBUG (25): n26-25= 0.976791.
DEBUG (25): a26-25= 38364.
DEBUG (25): b26-25= 64008.
DEBUG (50): packet received from 1.
DEBUG (50): sourceid= 29.
DEBUG (50): r1250= 0.
DEBUG (50): r150= 0.
DEBUG (50): r250= 0.
DEBUG (50): s50[0]= 0.000000.
DEBUG (50): s50[1]= 1.000000.
DEBUG (50): s50[2]= 0.000000.
DEBUG (50): s50[3]= 1.000000.
DEBUG (50): a1= 34582.
DEBUG (50): b1= 43141.
DEBUG (50): btrpkt->n1= 7.
DEBUG (50): btrpkt->n2= 2.
DEBUG (50): btrpkt->n3= 100.
DEBUG (50): btrpkt->n4= 100.
DEBUG (50): btrpkt->n5= 100.
DEBUG (50): btrpkt->n6= 100.
DEBUG (50): ws1= 4.
DEBUG (50): ws2= 4.
DEBUG (50): wa2= 0.527600.
DEBUG (50): wb2= 0.658200.
DEBUG (50): btrpkt->n1= 7.
DEBUG (50): btrpkt->n2= 2.
DEBUG (50): btrpkt->n3= 100.
DEBUG (50): btrpkt->n4= 100.
DEBUG (50): btrpkt->n5= 100.
DEBUG (50): btrpkt->n6= 100.
DEBUG (50): m= 0.527687.
DEBUG (50): n= 0.658289.
DEBUG (50): a2= 34576.
DEBUG (50): b2= 43135.
DEBUG (4): packet received from 5.
DEBUG (4): r5784= 0.
DEBUG (4): r54= 0.
DEBUG (4): r74= 0.
DEBUG (4): r84= 0.
DEBUG (4): s4[0]= 0.000000.
DEBUG (4): s4[1]= 1.000000.
DEBUG (4): s4[2]= 0.548400.
DEBUG (4): s4[3]= 1.000000.
DEBUG (4): s4[4]= 0.000000.
DEBUG (4): s4[5]= 0.409100.
DEBUG (4): ws1= 4.
DEBUG (4): ws2= 4.
DEBUG (4): wa2= 0.756700.
DEBUG (4): wb2= 0.631800.
DEBUG (4): temppkt->n1= 8.
DEBUG (4): temppkt->n2= 1.
DEBUG (4): temppkt->n3= 100.
DEBUG (4): temppkt->n4= 100.
DEBUG (4): temppkt->n5= 100.
DEBUG (4): temppkt->n6= 100.
DEBUG (4): m5-4= 0.756786.
DEBUG (4): n5-4= 0.631891.
DEBUG (4): a5-4= 49590.
DEBUG (4): b5-4= 41405.
DEBUG (50): packet received from 2.
DEBUG (50): sourceid= 46.
DEBUG (50): r1250= 0.
DEBUG (50): r150= 0.
DEBUG (50): r250= 0.
DEBUG (50): s50[0]= 0.000000.
DEBUG (50): s50[1]= 1.000000.
DEBUG (50): s50[2]= 0.000000.
DEBUG (50): s50[3]= 1.000000.
DEBUG (50): a1= 44747.
DEBUG (50): b1= 46254.
DEBUG (50): btrpkt->n1= 9.
DEBUG (50): btrpkt->n2= 100.
DEBUG (50): btrpkt->n3= 100.
DEBUG (50): btrpkt->n4= 100.
DEBUG (50): btrpkt->n5= 100.
DEBUG (50): btrpkt->n6= 100.
DEBUG (50): ws1= 4.
DEBUG (50): ws2= 4.
DEBUG (50): wa2= 0.682700.
DEBUG (50): wb2= 0.705700.
DEBUG (50): btrpkt->n1= 9.
DEBUG (50): btrpkt->n2= 100.
DEBUG (50): btrpkt->n3= 100.
DEBUG (50): btrpkt->n4= 100.
DEBUG (50): btrpkt->n5= 100.
DEBUG (50): btrpkt->n6= 100.
DEBUG (50): m= 0.682795.
DEBUG (50): n= 0.705791.
DEBUG (50): a2= 44740.
DEBUG (50): b2= 46248.
DEBUG (10): packet received from 11.
DEBUG (10): r112310= 0.
DEBUG (10): r1110= 0.
DEBUG (10): r2310= 0.
DEBUG (10): s10[0]= 0.000000.
DEBUG (10): s10[1]= 1.000000.
DEBUG (10): s10[2]= 0.000000.
DEBUG (10): s10[3]= 0.485700.
DEBUG (10): ws1= 4.
DEBUG (10): ws2= 4.
DEBUG (10): wa2= 0.720200.
DEBUG (10): wb2= 0.830200.
DEBUG (10): temppkt->n1= 9.
DEBUG (10): temppkt->n2= 100.
DEBUG (10): temppkt->n3= 100.
DEBUG (10): temppkt->n4= 100.
DEBUG (10): temppkt->n5= 100.
DEBUG (10): temppkt->n6= 100.
DEBUG (10): m11-10= 0.720287.
DEBUG (10): n11-10= 0.830289.
DEBUG (10): a11-10= 47198.
DEBUG (10): b11-10= 54407.
DEBUG (13): packet received from 14.
DEBUG (13): r1413= 0.
DEBUG (13): ws1= 4.
DEBUG (13): ws2= 4.
DEBUG (13): wa2= 0.115700.
DEBUG (13): wb2= 0.585400.
DEBUG (13): temppkt->n1= 7.
DEBUG (13): temppkt->n2= 5.
DEBUG (13): temppkt->n3= 5.
DEBUG (13): temppkt->n4= 100.
DEBUG (13): temppkt->n5= 100.
DEBUG (13): temppkt->n6= 100.
DEBUG (13): m14-13= 0.115785.
DEBUG (13): n14-13= 0.585489.
DEBUG (13): a14-13= 7582.
DEBUG (13): b14-13= 38364.
DEBUG (7): packet received from 22.
DEBUG (7): r10227= 0.
DEBUG (7): r107= 0.
DEBUG (7): r227= 0.
DEBUG (7): s7[0]= 0.000000.
DEBUG (7): s7[1]= 1.000000.
DEBUG (7): s7[2]= 0.000000.
DEBUG (7): s7[3]= 1.000000.
DEBUG (7): ws1= 4.
DEBUG (7): ws2= 4.
DEBUG (7): wa2= 0.454400.
DEBUG (7): wb2= 0.595500.
DEBUG (7): temppkt->n1= 7.
DEBUG (7): temppkt->n2= 4.
DEBUG (7): temppkt->n3= 6.
DEBUG (7): temppkt->n4= 100.
DEBUG (7): temppkt->n5= 100.
DEBUG (7): temppkt->n6= 100.
DEBUG (7): m22-7= 0.454490.
DEBUG (7): n22-7= 0.595590.
DEBUG (7): a22-7= 29779.
DEBUG (7): b22-7= 39026.
DEBUG (8): packet received from 21.
DEBUG (8): r218= 0.
DEBUG (8): ws1= 4.
DEBUG (8): ws2= 4.
DEBUG (8): wa2= 0.444300.
DEBUG (8): wb2= 0.217700.
DEBUG (8): temppkt->n1= 8.
DEBUG (8): temppkt->n2= 1.
DEBUG (8): temppkt->n3= 100.
DEBUG (8): temppkt->n4= 100.
DEBUG (8): temppkt->n5= 100.
DEBUG (8): temppkt->n6= 100.
DEBUG (8): m21-8= 0.444389.
DEBUG (8): n21-8= 0.217792.
DEBUG (8): a21-8= 29117.
DEBUG (8): b21-8= 14266.
DEBUG (21): packet received from 9.
DEBUG (21): r921= 0.
DEBUG (21): ws1= 4.
DEBUG (21): ws2= 4.
DEBUG (21): wa2= 0.797700.
DEBUG (21): wb2= 0.675800.
DEBUG (21): temppkt->n1= 9.
DEBUG (21): temppkt->n2= 9.
DEBUG (21): temppkt->n3= 4.
DEBUG (21): temppkt->n4= 100.
DEBUG (21): temppkt->n5= 100.
DEBUG (21): temppkt->n6= 100.
DEBUG (21): m9-21= 0.797784.
DEBUG (21): n9-21= 0.675898.
DEBUG (21): a9-21= 52277.
DEBUG (21): b9-21= 44288.
DEBUG (6): packet received from 9.
DEBUG (6): r96= 0.
DEBUG (6): ws1= 4.
DEBUG (6): ws2= 4.
DEBUG (6): wa2= 0.898600.
DEBUG (6): wb2= 0.797700.
DEBUG (6): temppkt->n1= 9.
DEBUG (6): temppkt->n2= 9.
DEBUG (6): temppkt->n3= 4.
DEBUG (6): temppkt->n4= 100.
DEBUG (6): temppkt->n5= 100.
DEBUG (6): temppkt->n6= 100.
DEBUG (6): m9-6= 0.898646.
DEBUG (6): n9-6= 0.797784.
DEBUG (6): a9-6= 58889.
DEBUG (6): b9-6= 52277.
DEBUG (1): packet received from 4.
DEBUG (1): r341= 0.
DEBUG (1): r31= 0.
DEBUG (1): r41= 0.
DEBUG (1): s1[0]= 0.000000.
DEBUG (1): s1[1]= 1.000000.
DEBUG (1): s1[2]= 0.000000.
DEBUG (1): s1[3]= 1.000000.
DEBUG (1): ws1= 4.
DEBUG (1): ws2= 4.
DEBUG (1): wa2= 0.756600.
DEBUG (1): wb2= 0.631700.
DEBUG (1): temppkt->n1= 8.
DEBUG (1): temppkt->n2= 1.
DEBUG (1): temppkt->n3= 100.
DEBUG (1): temppkt->n4= 100.
DEBUG (1): temppkt->n5= 100.
DEBUG (1): temppkt->n6= 100.
DEBUG (1): m4-1= 0.756695.
DEBUG (1): n4-1= 0.631800.
DEBUG (1): a4-1= 49583.
DEBUG (1): b4-1= 41398.
DEBUG (24): packet received from 25.
DEBUG (24): r253524= 0.
DEBUG (24): r2524= 0.
DEBUG (24): r3524= 0.
DEBUG (24): s24[0]= 0.511600.
DEBUG (24): s24[1]= 1.000000.
DEBUG (24): s24[2]= 0.000000.
DEBUG (24): s24[3]= 0.448300.
DEBUG (24): ws1= 4.
DEBUG (24): ws2= 4.
DEBUG (24): wa2= 0.785500.
DEBUG (24): wb2= 0.976600.
DEBUG (24): temppkt->n1= 7.
DEBUG (24): temppkt->n2= 5.
DEBUG (24): temppkt->n3= 5.
DEBUG (24): temppkt->n4= 100.
DEBUG (24): temppkt->n5= 100.
DEBUG (24): temppkt->n6= 100.
DEBUG (24): m25-24= 0.785587.
DEBUG (24): n25-24= 0.976699.
DEBUG (24): a25-24= 51477.
DEBUG (24): b25-24= 64001.
DEBUG (12): packet received from 25.
DEBUG (12): r132512= 0.
DEBUG (12): r1312= 0.
DEBUG (12): r2512= 0.
DEBUG (12): s12[0]= 0.000000.
DEBUG (12): s12[1]= 1.000000.
DEBUG (12): s12[2]= 0.000000.
DEBUG (12): s12[3]= 0.511600.
DEBUG (12): ws1= 4.
DEBUG (12): ws2= 4.
DEBUG (12): wa2= 0.585300.
DEBUG (12): wb2= 0.785500.
DEBUG (12): temppkt->n1= 7.
DEBUG (12): temppkt->n2= 5.
DEBUG (12): temppkt->n3= 5.
DEBUG (12): temppkt->n4= 100.
DEBUG (12): temppkt->n5= 100.
DEBUG (12): temppkt->n6= 100.
DEBUG (12): m25-12= 0.585397.
DEBUG (12): n25-12= 0.785587.
DEBUG (12): a25-12= 38357.
DEBUG (12): b25-12= 51477.
DEBUG (7): packet received from 10.
DEBUG (7): r10227= 0.
DEBUG (7): r107= 0.
DEBUG (7): r227= 0.
DEBUG (7): s7[0]= 0.000000.
DEBUG (7): s7[1]= 1.000000.
DEBUG (7): s7[2]= 0.000000.
DEBUG (7): s7[3]= 1.000000.
DEBUG (7): ws1= 4.
DEBUG (7): ws2= 4.
DEBUG (7): wa2= 0.720100.
DEBUG (7): wb2= 0.830100.
DEBUG (7): temppkt->n1= 9.
DEBUG (7): temppkt->n2= 100.
DEBUG (7): temppkt->n3= 100.
DEBUG (7): temppkt->n4= 100.
DEBUG (7): temppkt->n5= 100.
DEBUG (7): temppkt->n6= 100.
DEBUG (7): m10-7= 0.720195.
DEBUG (7): n10-7= 0.830198.
DEBUG (7): a10-7= 47191.
DEBUG (7): b10-7= 54400.
DEBUG (8): packet received from 21.
DEBUG (8): r218= 0.
DEBUG (8): ws1= 4.
DEBUG (8): ws2= 4.
DEBUG (8): wa2= 0.797600.
DEBUG (8): wb2= 0.675700.
DEBUG (8): temppkt->n1= 9.
DEBUG (8): temppkt->n2= 9.
DEBUG (8): temppkt->n3= 4.
DEBUG (8): temppkt->n4= 100.
DEBUG (8): temppkt->n5= 100.
DEBUG (8): temppkt->n6= 100.
DEBUG (8): m21-8= 0.797696.
DEBUG (8): n21-8= 0.675792.
DEBUG (8): a21-8= 52270.
DEBUG (8): b21-8= 44282.
DEBUG (11): packet received from 12.
DEBUG (11): r1211= 0.
DEBUG (11): ws1= 4.
DEBUG (11): ws2= 4.
DEBUG (11): wa2= 0.585200.
DEBUG (11): wb2= 0.785400.
DEBUG (11): temppkt->n1= 7.
DEBUG (11): temppkt->n2= 5.
DEBUG (11): temppkt->n3= 5.
DEBUG (11): temppkt->n4= 100.
DEBUG (11): temppkt->n5= 100.
DEBUG (11): temppkt->n6= 100.
DEBUG (11): m12-11= 0.585290.
DEBUG (11): n12-11= 0.785489.
DEBUG (11): a12-11= 38351.
DEBUG (11): b12-11= 51471.
DEBUG (23): packet received from 24.
DEBUG (23): r2423= 0.
DEBUG (23): ws1= 4.
DEBUG (23): ws2= 4.
DEBUG (23): wa2= 0.785400.
DEBUG (23): wb2= 0.976500.
DEBUG (23): temppkt->n1= 7.
DEBUG (23): temppkt->n2= 5.
DEBUG (23): temppkt->n3= 5.
DEBUG (23): temppkt->n4= 100.
DEBUG (23): temppkt->n5= 100.
DEBUG (23): temppkt->n6= 100.
DEBUG (23): m24-23= 0.785489.
DEBUG (23): n24-23= 0.976593.
DEBUG (23): a24-23= 51471.
DEBUG (23): b24-23= 63994.
DEBUG (50): packet received from 1.
DEBUG (50): sourceid= 35.
DEBUG (50): r1250= 0.
DEBUG (50): r150= 0.
DEBUG (50): r250= 0.
DEBUG (50): s50[0]= 0.000000.
DEBUG (50): s50[1]= 1.000000.
DEBUG (50): s50[2]= 0.000000.
DEBUG (50): s50[3]= 1.000000.
DEBUG (50): a1= 49583.
DEBUG (50): b1= 41398.
DEBUG (50): btrpkt->n1= 8.
DEBUG (50): btrpkt->n2= 1.
DEBUG (50): btrpkt->n3= 100.
DEBUG (50): btrpkt->n4= 100.
DEBUG (50): btrpkt->n5= 100.
DEBUG (50): btrpkt->n6= 100.
DEBUG (50): ws1= 4.
DEBUG (50): ws2= 4.
DEBUG (50): wa2= 0.756500.
DEBUG (50): wb2= 0.631600.
DEBUG (50): btrpkt->n1= 8.
DEBUG (50): btrpkt->n2= 1.
DEBUG (50): btrpkt->n3= 100.
DEBUG (50): btrpkt->n4= 100.
DEBUG (50): btrpkt->n5= 100.
DEBUG (50): btrpkt->n6= 100.
DEBUG (50): m= 0.756588.
DEBUG (50): n= 0.631693.
DEBUG (50): a2= 49577.
DEBUG (50): b2= 41391.
DEBUG (2): packet received from 6.
DEBUG (2): r62= 0.
DEBUG (2): ws1= 4.
DEBUG (2): ws2= 4.
DEBUG (2): wa2= 0.898500.
DEBUG (2): wb2= 0.797600.
DEBUG (2): temppkt->n1= 9.
DEBUG (2): temppkt->n2= 9.
DEBUG (2): temppkt->n3= 4.
DEBUG (2): temppkt->n4= 100.
DEBUG (2): temppkt->n5= 100.
DEBUG (2): temppkt->n6= 100.
DEBUG (2): m6-2= 0.898589.
DEBUG (2): n6-2= 0.797696.
DEBUG (2): a6-2= 58883.
DEBUG (2): b6-2= 52270.
DEBUG (50): packet received from 2.
DEBUG (50): sourceid= 49.
DEBUG (50): r1250= 0.
DEBUG (50): r150= 0.
DEBUG (50): r250= 0.
DEBUG (50): s50[0]= 0.000000.
DEBUG (50): s50[1]= 1.000000.
DEBUG (50): s50[2]= 0.000000.
DEBUG (50): s50[3]= 1.000000.
DEBUG (50): a1= 58883.
DEBUG (50): b1= 52270.
DEBUG (50): btrpkt->n1= 9.
DEBUG (50): btrpkt->n2= 9.
DEBUG (50): btrpkt->n3= 4.
DEBUG (50): btrpkt->n4= 100.
DEBUG (50): btrpkt->n5= 100.
DEBUG (50): btrpkt->n6= 100.
DEBUG (50): ws1= 4.
DEBUG (50): ws2= 4.
DEBUG (50): wa2= 0.898400.
DEBUG (50): wb2= 0.797500.
DEBUG (50): btrpkt->n1= 9.
DEBUG (50): btrpkt->n2= 9.
DEBUG (50): btrpkt->n3= 4.
DEBUG (50): btrpkt->n4= 100.
DEBUG (50): btrpkt->n5= 100.
DEBUG (50): btrpkt->n6= 100.
DEBUG (50): m= 0.898497.
DEBUG (50): n= 0.797589.
DEBUG (50): a2= 58876.
DEBUG (50): b2= 52264.
DEBUG (4): packet received from 8.
DEBUG (4): r5784= 0.
DEBUG (4): r54= 0.
DEBUG (4): r74= 0.
DEBUG (4): r84= 0.
DEBUG (4): s4[0]= 0.000000.
DEBUG (4): s4[1]= 1.000000.
DEBUG (4): s4[2]= 0.548400.
DEBUG (4): s4[3]= 1.000000.
DEBUG (4): s4[4]= 0.000000.
DEBUG (4): s4[5]= 0.409100.
DEBUG (4): ws1= 4.
DEBUG (4): ws2= 4.
DEBUG (4): temppkt4= 7.
DEBUG (4): wa1= 9750.
DEBUG (4): wb1= 4770.
DEBUG (4): wa2= 0.975000.
DEBUG (4): wb2= 0.477000.
DEBUG (4): temppkt->n1= 9.
DEBUG (4): temppkt->n2= 9.
DEBUG (4): temppkt->n3= 4.
DEBUG (4): temppkt->n4= 7.
DEBUG (4): temppkt->n5= 100.
DEBUG (4): temppkt->n6= 100.
DEBUG (4): m8-4= 0.797589.
DEBUG (4): n8-4= 0.747724.
DEBUG (4): a8-4= 63896.
DEBUG (4): b8-4= 31260.
DEBUG (5): packet received from 8.
DEBUG (5): r895= 0.
DEBUG (5): r85= 0.
DEBUG (5): r95= 0.
DEBUG (5): s5[0]= 0.409100.
DEBUG (5): s5[1]= 1.000000.
DEBUG (5): s5[2]= 0.000000.
DEBUG (5): s5[3]= 0.231900.
DEBUG (5): ws1= 4.
DEBUG (5): ws2= 4.
DEBUG (5): wa2= 0.747700.
DEBUG (5): wb2= 0.675700.
DEBUG (5): temppkt->n1= 9.
DEBUG (5): temppkt->n2= 9.
DEBUG (5): temppkt->n3= 4.
DEBUG (5): temppkt->n4= 100.
DEBUG (5): temppkt->n5= 100.
DEBUG (5): temppkt->n6= 100.
DEBUG (5): m8-5= 0.747724.
DEBUG (5): n8-5= 0.675700.
DEBUG (5): a8-5= 49000.
DEBUG (5): b8-5= 44282.
DEBUG (10): packet received from 11.
DEBUG (10): r112310= 0.
DEBUG (10): r1110= 0.
DEBUG (10): r2310= 0.
DEBUG (10): s10[0]= 0.000000.
DEBUG (10): s10[1]= 1.000000.
DEBUG (10): s10[2]= 0.000000.
DEBUG (10): s10[3]= 0.485700.
DEBUG (10): ws1= 4.
DEBUG (10): ws2= 4.
DEBUG (10): wa2= 0.585100.
DEBUG (10): wb2= 0.785300.
DEBUG (10): temppkt->n1= 7.
DEBUG (10): temppkt->n2= 5.
DEBUG (10): temppkt->n3= 5.
DEBUG (10): temppkt->n4= 100.
DEBUG (10): temppkt->n5= 100.
DEBUG (10): temppkt->n6= 100.
DEBUG (10): m11-10= 0.585199.
DEBUG (10): n11-10= 0.785397.
DEBUG (10): a11-10= 38344.
DEBUG (10): b11-10= 51464.
DEBUG (22): packet received from 23.
DEBUG (22): r233322= 0.
DEBUG (22): r2322= 0.
DEBUG (22): r3322= 0.
DEBUG (22): s22[0]= 0.485700.
DEBUG (22): s22[1]= 1.000000.
DEBUG (22): s22[2]= 0.000000.
DEBUG (22): s22[3]= 0.561000.
DEBUG (22): ws1= 4.
DEBUG (22): ws2= 4.
DEBUG (22): wa2= 0.878200.
DEBUG (22): wb2= 0.976400.
DEBUG (22): temppkt->n1= 7.
DEBUG (22): temppkt->n2= 5.
DEBUG (22): temppkt->n3= 5.
DEBUG (22): temppkt->n4= 100.
DEBUG (22): temppkt->n5= 100.
DEBUG (22): temppkt->n6= 100.
DEBUG (22): m23-22= 0.878209.
DEBUG (22): n23-22= 0.976486.
DEBUG (22): a23-22= 57552.
DEBUG (22): b23-22= 63988.
DEBUG (7): packet received from 10.
DEBUG (7): r10227= 0.
DEBUG (7): r107= 0.
DEBUG (7): r227= 0.
DEBUG (7): s7[0]= 0.000000.
DEBUG (7): s7[1]= 1.000000.
DEBUG (7): s7[2]= 0.000000.
DEBUG (7): s7[3]= 1.000000.
DEBUG (7): ws1= 4.
DEBUG (7): ws2= 4.
DEBUG (7): wa2= 0.585000.
DEBUG (7): wb2= 0.785200.
DEBUG (7): temppkt->n1= 7.
DEBUG (7): temppkt->n2= 5.
DEBUG (7): temppkt->n3= 5.
DEBUG (7): temppkt->n4= 100.
DEBUG (7): temppkt->n5= 100.
DEBUG (7): temppkt->n6= 100.
DEBUG (7): m10-7= 0.585092.
DEBUG (7): n10-7= 0.785290.
DEBUG (7): a10-7= 38337.
DEBUG (7): b10-7= 51458.
DEBUG (4): packet received from 5.
DEBUG (4): r5784= 0.
DEBUG (4): r54= 0.
DEBUG (4): r74= 0.
DEBUG (4): r84= 0.
DEBUG (4): s4[0]= 0.000000.
DEBUG (4): s4[1]= 1.000000.
DEBUG (4): s4[2]= 0.548400.
DEBUG (4): s4[3]= 1.000000.
DEBUG (4): s4[4]= 0.000000.
DEBUG (4): s4[5]= 0.409100.
DEBUG (4): ws1= 4.
DEBUG (4): ws2= 4.
DEBUG (4): wa2= 0.747600.
DEBUG (4): wb2= 0.675700.
DEBUG (4): temppkt->n1= 9.
DEBUG (4): temppkt->n2= 9.
DEBUG (4): temppkt->n3= 4.
DEBUG (4): temppkt->n4= 100.
DEBUG (4): temppkt->n5= 100.
DEBUG (4): temppkt->n6= 100.
DEBUG (4): m5-4= 0.747692.
DEBUG (4): n5-4= 0.675700.
DEBUG (4): a5-4= 48993.
DEBUG (4): b5-4= 44282.
DEBUG (7): packet received from 22.
DEBUG (7): r10227= 0.
DEBUG (7): r107= 0.
DEBUG (7): r227= 0.
DEBUG (7): s7[0]= 0.000000.
DEBUG (7): s7[1]= 1.000000.
DEBUG (7): s7[2]= 0.000000.
DEBUG (7): s7[3]= 1.000000.
DEBUG (7): ws1= 4.
DEBUG (7): ws2= 4.
DEBUG (7): wa2= 0.878100.
DEBUG (7): wb2= 0.976300.
DEBUG (7): temppkt->n1= 7.
DEBUG (7): temppkt->n2= 5.
DEBUG (7): temppkt->n3= 5.
DEBUG (7): temppkt->n4= 100.
DEBUG (7): temppkt->n5= 100.
DEBUG (7): temppkt->n6= 100.
DEBUG (7): m22-7= 0.878187.
DEBUG (7): n22-7= 0.976394.
DEBUG (7): a22-7= 57546.
DEBUG (7): b22-7= 63981.
DEBUG (1): packet received from 4.
DEBUG (1): r341= 0.
DEBUG (1): r31= 0.
DEBUG (1): r41= 0.
DEBUG (1): s1[0]= 0.000000.
DEBUG (1): s1[1]= 1.000000.
DEBUG (1): s1[2]= 0.000000.
DEBUG (1): s1[3]= 1.000000.
DEBUG (1): ws1= 4.
DEBUG (1): ws2= 4.
DEBUG (1): wa2= 0.747500.
DEBUG (1): wb2= 0.675700.
DEBUG (1): temppkt->n1= 9.
DEBUG (1): temppkt->n2= 9.
DEBUG (1): temppkt->n3= 4.
DEBUG (1): temppkt->n4= 100.
DEBUG (1): temppkt->n5= 100.
DEBUG (1): temppkt->n6= 100.
DEBUG (1): m4-1= 0.747585.
DEBUG (1): n4-1= 0.675700.
DEBUG (1): a4-1= 48987.
DEBUG (1): b4-1= 44282.
DEBUG (3): packet received from 7.
DEBUG (3): r73= 0.
DEBUG (3): ws1= 4.
DEBUG (3): ws2= 4.
DEBUG (3): wa2= 0.878000.
DEBUG (3): wb2= 0.931900.
DEBUG (3): temppkt->n1= 7.
DEBUG (3): temppkt->n2= 5.
DEBUG (3): temppkt->n3= 5.
DEBUG (3): temppkt->n4= 100.
DEBUG (3): temppkt->n5= 100.
DEBUG (3): temppkt->n6= 100.
DEBUG (3): m7-3= 0.878096.
DEBUG (3): n7-3= 0.931944.
DEBUG (3): a7-3= 57539.
DEBUG (3): b7-3= 61072.
DEBUG (4): packet received from 7.
DEBUG (4): r5784= 0.
DEBUG (4): r54= 0.
DEBUG (4): r74= 0.
DEBUG (4): r84= 0.
DEBUG (4): s4[0]= 0.000000.
DEBUG (4): s4[1]= 1.000000.
DEBUG (4): s4[2]= 0.548400.
DEBUG (4): s4[3]= 1.000000.
DEBUG (4): s4[4]= 0.000000.
DEBUG (4): s4[5]= 0.409100.
DEBUG (4): ws1= 4.
DEBUG (4): ws2= 4.
DEBUG (4): temppkt4= 9.
DEBUG (4): wa1= 3190.
DEBUG (4): wb1= 7620.
DEBUG (4): wa2= 0.319000.
DEBUG (4): wb2= 0.762000.
DEBUG (4): temppkt->n1= 7.
DEBUG (4): temppkt->n2= 5.
DEBUG (4): temppkt->n3= 5.
DEBUG (4): temppkt->n4= 9.
DEBUG (4): temppkt->n5= 100.
DEBUG (4): temppkt->n6= 100.
DEBUG (4): m7-4= 0.931944.
DEBUG (4): n7-4= 0.976287.
DEBUG (4): a7-4= 20905.
DEBUG (4): b7-4= 49937.
DEBUG (1): packet received from 3.
DEBUG (1): r341= 0.
DEBUG (1): r31= 0.
DEBUG (1): r41= 0.
DEBUG (1): s1[0]= 0.000000.
DEBUG (1): s1[1]= 1.000000.
DEBUG (1): s1[2]= 0.000000.
DEBUG (1): s1[3]= 1.000000.
DEBUG (1): ws1= 4.
DEBUG (1): ws2= 4.
DEBUG (1): wa2= 0.877900.
DEBUG (1): wb2= 0.931800.
DEBUG (1): temppkt->n1= 7.
DEBUG (1): temppkt->n2= 5.
DEBUG (1): temppkt->n3= 5.
DEBUG (1): temppkt->n4= 100.
DEBUG (1): temppkt->n5= 100.
DEBUG (1): temppkt->n6= 100.
DEBUG (1): m3-1= 0.877989.
DEBUG (1): n3-1= 0.931899.
DEBUG (1): a3-1= 57533.
DEBUG (1): b3-1= 61065.
DEBUG (1): packet received from 4.
DEBUG (1): r341= 0.
DEBUG (1): r31= 0.
DEBUG (1): r41= 0.
DEBUG (1): s1[0]= 0.000000.
DEBUG (1): s1[1]= 1.000000.
DEBUG (1): s1[2]= 0.000000.
DEBUG (1): s1[3]= 1.000000.
DEBUG (1): ws1= 4.
DEBUG (1): ws2= 4.
DEBUG (1): wa2= 0.318900.
DEBUG (1): wb2= 0.761900.
DEBUG (1): temppkt->n1= 7.
DEBUG (1): temppkt->n2= 5.
DEBUG (1): temppkt->n3= 5.
DEBUG (1): temppkt->n4= 9.
DEBUG (1): temppkt->n5= 100.
DEBUG (1): temppkt->n6= 100.
DEBUG (1): m4-1= 0.318990.
DEBUG (1): n4-1= 0.761990.
DEBUG (1): a4-1= 20899.
DEBUG (1): b4-1= 49931.
DEBUG (50): packet received from 1.
DEBUG (50): sourceid= 32.
DEBUG (50): r1250= 0.
DEBUG (50): r150= 0.
DEBUG (50): r250= 0.
DEBUG (50): s50[0]= 0.000000.
DEBUG (50): s50[1]= 1.000000.
DEBUG (50): s50[2]= 0.000000.
DEBUG (50): s50[3]= 1.000000.
DEBUG (50): a1= 20899.
DEBUG (50): b1= 49931.
DEBUG (50): btrpkt->n1= 7.
DEBUG (50): btrpkt->n2= 5.
DEBUG (50): btrpkt->n3= 5.
DEBUG (50): btrpkt->n4= 9.
DEBUG (50): btrpkt->n5= 100.
DEBUG (50): btrpkt->n6= 100.
DEBUG (50): ws1= 4.
DEBUG (50): ws2= 4.
DEBUG (50): wa2= 0.318800.
DEBUG (50): wb2= 0.761800.
DEBUG (50): btrpkt->n1= 7.
DEBUG (50): btrpkt->n2= 5.
DEBUG (50): btrpkt->n3= 5.
DEBUG (50): btrpkt->n4= 9.
DEBUG (50): btrpkt->n5= 100.
DEBUG (50): btrpkt->n6= 100.
DEBUG (50): m= 0.318898.
DEBUG (50): n= 0.761898.
DEBUG (50): a2= 20892.
DEBUG (50): b2= 49924.
DEBUG (1): count is 2.
DEBUG (1): **************************.
DEBUG (2): count is 2.
DEBUG (2): **************************.
DEBUG (3): count is 2.
DEBUG (3): **************************.
DEBUG (4): count is 2.
DEBUG (4): **************************.
DEBUG (5): count is 2.
DEBUG (5): **************************.
DEBUG (6): count is 2.
DEBUG (6): **************************.
DEBUG (7): count is 2.
DEBUG (7): **************************.
DEBUG (8): count is 2.
DEBUG (8): **************************.
DEBUG (9): count is 2.
DEBUG (9): **************************.
DEBUG (10): count is 2.
DEBUG (10): **************************.
DEBUG (11): count is 2.
DEBUG (11): **************************.
DEBUG (12): count is 2.
DEBUG (12): **************************.
DEBUG (13): count is 2.
DEBUG (13): **************************.
DEBUG (14): count is 2.
DEBUG (14): **************************.
DEBUG (15): count is 2.
DEBUG (15): **************************.
DEBUG (16): count is 2.
DEBUG (16): **************************.
DEBUG (17): count is 2.
DEBUG (17): **************************.
DEBUG (18): count is 2.
DEBUG (18): **************************.
DEBUG (19): count is 2.
DEBUG (19): **************************.
DEBUG (20): count is 2.
DEBUG (20): **************************.
DEBUG (21): count is 2.
DEBUG (21): **************************.
DEBUG (22): count is 2.
DEBUG (22): **************************.
DEBUG (23): count is 2.
DEBUG (23): **************************.
DEBUG (24): count is 2.
DEBUG (24): **************************.
DEBUG (25): count is 2.
DEBUG (25): **************************.
DEBUG (26): count is 2.
DEBUG (26): **************************.
DEBUG (27): count is 2.
DEBUG (27): **************************.
DEBUG (28): count is 2.
DEBUG (28): **************************.
DEBUG (29): count is 2.
DEBUG (29): **************************.
DEBUG (30): count is 2.
DEBUG (30): **************************.
DEBUG (31): count is 2.
DEBUG (31): **************************.
DEBUG (32): count is 2.
DEBUG (32): **************************.
DEBUG (33): count is 2.
DEBUG (33): **************************.
DEBUG (34): count is 2.
DEBUG (34): **************************.
DEBUG (35): count is 2.
DEBUG (35): **************************.
DEBUG (36): count is 2.
DEBUG (36): **************************.
DEBUG (37): count is 2.
DEBUG (37): **************************.
DEBUG (38): count is 2.
DEBUG (38): **************************.
DEBUG (39): count is 2.
DEBUG (39): **************************.
DEBUG (40): count is 2.
DEBUG (40): **************************.
DEBUG (41): count is 2.
DEBUG (41): **************************.
DEBUG (42): count is 2.
DEBUG (42): **************************.
DEBUG (43): count is 2.
DEBUG (43): **************************.
DEBUG (44): count is 2.
DEBUG (44): **************************.
DEBUG (45): count is 2.
DEBUG (45): **************************.
DEBUG (46): count is 2.
DEBUG (46): **************************.
DEBUG (47): count is 2.
DEBUG (47): **************************.
DEBUG (48): count is 2.
DEBUG (48): **************************.
DEBUG (49): count is 2.
DEBUG (49): **************************.
DEBUG (50): count is 2.
DEBUG (50): **************************.
DEBUG (6): packet received from 9.
DEBUG (6): r96= 0.
DEBUG (6): ws1= 4.
DEBUG (6): ws2= 4.
DEBUG (6): temppkt1= 5.
DEBUG (6): wa1= 6600.
DEBUG (6): wb1= 7980.
DEBUG (6): wa2= 0.660000.
DEBUG (6): wb2= 0.798000.
DEBUG (6): a1= 0.
DEBUG (6): temppkt->n1= 5.
DEBUG (6): temppkt->n2= 100.
DEBUG (6): temppkt->n3= 100.
DEBUG (6): temppkt->n4= 100.
DEBUG (6): temppkt->n5= 100.
DEBUG (6): temppkt->n6= 100.
DEBUG (6): m9-6= 0.566019.
DEBUG (6): n9-6= 0.579865.
DEBUG (6): a9-6= 43253.
DEBUG (6): b9-6= 52296.
DEBUG (5): packet received from 9.
DEBUG (5): r895= 0.
DEBUG (5): r85= 0.
DEBUG (5): r95= 0.
DEBUG (5): s5[0]= 0.409100.
DEBUG (5): s5[1]= 1.000000.
DEBUG (5): s5[2]= 0.000000.
DEBUG (5): s5[3]= 0.231900.
DEBUG (5): ws1= 4.
DEBUG (5): ws2= 4.
DEBUG (5): temppkt1= 5.
DEBUG (5): wa1= 5670.
DEBUG (5): wb1= 6600.
DEBUG (5): wa2= 0.567000.
DEBUG (5): wb2= 0.660000.
DEBUG (5): a1= 0.
DEBUG (5): temppkt->n1= 5.
DEBUG (5): temppkt->n2= 100.
DEBUG (5): temppkt->n3= 100.
DEBUG (5): temppkt->n4= 100.
DEBUG (5): temppkt->n5= 100.
DEBUG (5): temppkt->n6= 100.
DEBUG (5): m9-5= 0.556786.
DEBUG (5): n9-5= 0.566019.
DEBUG (5): a9-5= 37158.
DEBUG (5): b9-5= 43253.
DEBUG (13): packet received from 14.
DEBUG (13): r1413= 0.
DEBUG (13): ws1= 4.
DEBUG (13): ws2= 4.
DEBUG (13): temppkt1= 8.
DEBUG (13): wa1= 3670.
DEBUG (13): wb1= 9310.
DEBUG (13): wa2= 0.367000.
DEBUG (13): wb2= 0.931000.
DEBUG (13): a1= 0.
DEBUG (13): temppkt->n1= 8.
DEBUG (13): temppkt->n2= 100.
DEBUG (13): temppkt->n3= 100.
DEBUG (13): temppkt->n4= 100.
DEBUG (13): temppkt->n5= 100.
DEBUG (13): temppkt->n6= 100.
DEBUG (13): m14-13= 0.836789.
DEBUG (13): n14-13= 0.893187.
DEBUG (13): a14-13= 24051.
DEBUG (13): b14-13= 61013.
DEBUG (4): packet received from 7.
DEBUG (4): r5784= 0.
DEBUG (4): r54= 0.
DEBUG (4): r74= 0.
DEBUG (4): r84= 0.
DEBUG (4): s4[0]= 0.000000.
DEBUG (4): s4[1]= 1.000000.
DEBUG (4): s4[2]= 0.548400.
DEBUG (4): s4[3]= 1.000000.
DEBUG (4): s4[4]= 0.000000.
DEBUG (4): s4[5]= 0.409100.
DEBUG (4): ws1= 4.
DEBUG (4): ws2= 4.
DEBUG (4): wa2= 0.472300.
DEBUG (4): wb2= 0.511900.
DEBUG (4): temppkt->n1= 100.
DEBUG (4): temppkt->n2= 100.
DEBUG (4): temppkt->n3= 100.
DEBUG (4): temppkt->n4= 100.
DEBUG (4): temppkt->n5= 100.
DEBUG (4): temppkt->n6= 100.
DEBUG (4): m7-4= 0.472335.
DEBUG (4): n7-4= 0.511986.
DEBUG (4): a7-4= 30952.
DEBUG (4): b7-4= 33547.
DEBUG (31): packet received from 32.
DEBUG (31): r3231= 0.
DEBUG (31): ws1= 4.
DEBUG (31): ws2= 4.
DEBUG (31): temppkt1= 7.
DEBUG (31): wa1= 5410.
DEBUG (31): wb1= 5880.
DEBUG (31): temppkt2= 5.
DEBUG (31): wa1= 4100.
DEBUG (31): wb1= 8800.
DEBUG (31): wa2= 0.410000.
DEBUG (31): wb2= 0.880000.
DEBUG (31): temppkt->n1= 7.
DEBUG (31): temppkt->n2= 5.
DEBUG (31): temppkt->n3= 100.
DEBUG (31): temppkt->n4= 100.
DEBUG (31): temppkt->n5= 100.
DEBUG (31): temppkt->n6= 100.
DEBUG (31): m32-31= 0.754149.
DEBUG (31): n32-31= 0.758892.
DEBUG (31): a32-31= 26869.
DEBUG (31): b32-31= 57670.
DEBUG (30): packet received from 41.
DEBUG (30): r314130= 0.
DEBUG (30): r3130= 0.
DEBUG (30): r4130= 0.
DEBUG (30): s30[0]= 0.000000.
DEBUG (30): s30[1]= 0.400000.
DEBUG (30): s30[2]= 0.000000.
DEBUG (30): s30[3]= 0.473700.
DEBUG (30): ws1= 4.
DEBUG (30): ws2= 4.
DEBUG (30): temppkt1= 8.
DEBUG (30): wa1= 9300.
DEBUG (30): wb1= 9500.
DEBUG (30): temppkt2= 9.
DEBUG (30): wa1= 3000.
DEBUG (30): wb1= 5000.
DEBUG (30): wa2= 0.300000.
DEBUG (30): wb2= 0.500000.
DEBUG (30): temppkt->n1= 8.
DEBUG (30): temppkt->n2= 9.
DEBUG (30): temppkt->n3= 100.
DEBUG (30): temppkt->n4= 100.
DEBUG (30): temppkt->n5= 100.
DEBUG (30): temppkt->n6= 100.
DEBUG (30): m41-30= 0.893095.
DEBUG (30): n41-30= 0.895083.
DEBUG (30): a41-30= 19660.
DEBUG (30): b41-30= 32767.
DEBUG (39): packet received from 40.
DEBUG (39): r404939= 0.
DEBUG (39): r4039= 0.
DEBUG (39): r4939= 0.
DEBUG (39): s39[0]= 0.000000.
DEBUG (39): s39[1]= 1.000000.
DEBUG (39): s39[2]= 0.000000.
DEBUG (39): s39[3]= 0.428600.
DEBUG (39): ws1= 4.
DEBUG (39): ws2= 4.
DEBUG (39): temppkt1= 8.
DEBUG (39): wa1= 8470.
DEBUG (39): wb1= 9300.
DEBUG (39): wa2= 0.847000.
DEBUG (39): wb2= 0.930000.
DEBUG (39): a1= 0.
DEBUG (39): temppkt->n1= 8.
DEBUG (39): temppkt->n2= 100.
DEBUG (39): temppkt->n3= 100.
DEBUG (39): temppkt->n4= 100.
DEBUG (39): temppkt->n5= 100.
DEBUG (39): temppkt->n6= 100.
DEBUG (39): m40-39= 0.884794.
DEBUG (39): n40-39= 0.893095.
DEBUG (39): a40-39= 55508.
DEBUG (39): b40-39= 60947.
DEBUG (23): packet received from 24.
DEBUG (23): r2423= 0.
DEBUG (23): ws1= 4.
DEBUG (23): ws2= 4.
DEBUG (23): temppkt1= 6.
DEBUG (23): wa1= 300.
DEBUG (23): wb1= 3120.
DEBUG (23): wa2= 0.030000.
DEBUG (23): wb2= 0.312000.
DEBUG (23): a1= 0.
DEBUG (23): temppkt->n1= 6.
DEBUG (23): temppkt->n2= 100.
DEBUG (23): temppkt->n3= 100.
DEBUG (23): temppkt->n4= 100.
DEBUG (23): temppkt->n5= 100.
DEBUG (23): temppkt->n6= 100.
DEBUG (23): m24-23= 0.603098.
DEBUG (23): n24-23= 0.631296.
DEBUG (23): a24-23= 1966.
DEBUG (23): b24-23= 20446.
DEBUG (35): packet received from 36.
DEBUG (35): r3635= 0.
DEBUG (35): ws1= 4.
DEBUG (35): ws2= 4.
DEBUG (35): temppkt1= 8.
DEBUG (35): wa1= 2180.
DEBUG (35): wb1= 4500.
DEBUG (35): wa2= 0.218000.
DEBUG (35): wb2= 0.450000.
DEBUG (35): a1= 0.
DEBUG (35): temppkt->n1= 8.
DEBUG (35): temppkt->n2= 100.
DEBUG (35): temppkt->n3= 100.
DEBUG (35): temppkt->n4= 100.
DEBUG (35): temppkt->n5= 100.
DEBUG (35): temppkt->n6= 100.
DEBUG (35): m36-35= 0.821897.
DEBUG (35): n36-35= 0.845090.
DEBUG (35): a36-35= 14286.
DEBUG (35): b36-35= 29490.
DEBUG (15): packet received from 16.
DEBUG (15): r1615= 0.
DEBUG (15): ws1= 4.
DEBUG (15): ws2= 4.
DEBUG (15): temppkt1= 9.
DEBUG (15): wa1= 2610.
DEBUG (15): wb1= 5930.
DEBUG (15): wa2= 0.261000.
DEBUG (15): wb2= 0.593000.
DEBUG (15): a1= 0.
DEBUG (15): temppkt->n1= 9.
DEBUG (15): temppkt->n2= 100.
DEBUG (15): temppkt->n3= 100.
DEBUG (15): temppkt->n4= 100.
DEBUG (15): temppkt->n5= 100.
DEBUG (15): temppkt->n6= 100.
DEBUG (15): m16-15= 0.926192.
DEBUG (15): n16-15= 0.959396.
DEBUG (15): a16-15= 17104.
DEBUG (15): b16-15= 38862.
DEBUG (8): packet received from 21.
DEBUG (8): r218= 0.
DEBUG (8): ws1= 4.
DEBUG (8): ws2= 4.
DEBUG (8): temppkt1= 5.
DEBUG (8): wa1= 2680.
DEBUG (8): wb1= 4920.
DEBUG (8): wa2= 0.268000.
DEBUG (8): wb2= 0.492000.
DEBUG (8): a1= 0.
DEBUG (8): temppkt->n1= 5.
DEBUG (8): temppkt->n2= 100.
DEBUG (8): temppkt->n3= 100.
DEBUG (8): temppkt->n4= 100.
DEBUG (8): temppkt->n5= 100.
DEBUG (8): temppkt->n6= 100.
DEBUG (8): m21-8= 0.526894.
DEBUG (8): n21-8= 0.549294.
DEBUG (8): a21-8= 17563.
DEBUG (8): b21-8= 32243.
DEBUG (18): packet received from 19.
DEBUG (18): r1918= 0.
DEBUG (18): ws1= 4.
DEBUG (18): ws2= 4.
DEBUG (18): temppkt1= 9.
DEBUG (18): wa1= 7210.
DEBUG (18): wb1= 8310.
DEBUG (18): wa2= 0.721000.
DEBUG (18): wb2= 0.831000.
DEBUG (18): a1= 0.
DEBUG (18): temppkt->n1= 9.
DEBUG (18): temppkt->n2= 100.
DEBUG (18): temppkt->n3= 100.
DEBUG (18): temppkt->n4= 100.
DEBUG (18): temppkt->n5= 100.
DEBUG (18): temppkt->n6= 100.
DEBUG (18): m19-18= 0.972198.
DEBUG (18): n19-18= 0.983200.
DEBUG (18): a19-18= 47250.
DEBUG (18): b19-18= 54459.
DEBUG (27): packet received from 28.
DEBUG (27): r2827= 0.
DEBUG (27): ws1= 4.
DEBUG (27): ws2= 4.
DEBUG (27): wa2= 0.697500.
DEBUG (27): wb2= 0.717400.
DEBUG (27): temppkt->n1= 100.
DEBUG (27): temppkt->n2= 100.
DEBUG (27): temppkt->n3= 100.
DEBUG (27): temppkt->n4= 100.
DEBUG (27): temppkt->n5= 100.
DEBUG (27): temppkt->n6= 100.
DEBUG (27): m28-27= 0.697597.
DEBUG (27): n28-27= 0.717494.
DEBUG (27): a28-27= 45710.
DEBUG (27): b28-27= 47014.
DEBUG (7): packet received from 10.
DEBUG (7): r10227= 0.
DEBUG (7): r107= 0.
DEBUG (7): r227= 0.
DEBUG (7): s7[0]= 0.000000.
DEBUG (7): s7[1]= 1.000000.
DEBUG (7): s7[2]= 0.000000.
DEBUG (7): s7[3]= 1.000000.
DEBUG (7): ws1= 4.
DEBUG (7): ws2= 4.
DEBUG (7): wa2= 0.596500.
DEBUG (7): wb2= 0.689700.
DEBUG (7): temppkt->n1= 100.
DEBUG (7): temppkt->n2= 100.
DEBUG (7): temppkt->n3= 100.
DEBUG (7): temppkt->n4= 100.
DEBUG (7): temppkt->n5= 100.
DEBUG (7): temppkt->n6= 100.
DEBUG (7): m10-7= 0.596597.
DEBUG (7): n10-7= 0.689799.
DEBUG (7): a10-7= 39091.
DEBUG (7): b10-7= 45199.
DEBUG (9): packet received from 43.
DEBUG (9): r439= 0.
DEBUG (9): ws1= 4.
DEBUG (9): ws2= 4.
DEBUG (9): temppkt1= 9.
DEBUG (9): wa1= 550.
DEBUG (9): wb1= 3440.
DEBUG (9): wa2= 0.055000.
DEBUG (9): wb2= 0.344000.
DEBUG (9): a1= 0.
DEBUG (9): temppkt->n1= 9.
DEBUG (9): temppkt->n2= 100.
DEBUG (9): temppkt->n3= 100.
DEBUG (9): temppkt->n4= 100.
DEBUG (9): temppkt->n5= 100.
DEBUG (9): temppkt->n6= 100.
DEBUG (9): m43-9= 0.905592.
DEBUG (9): n43-9= 0.934493.
DEBUG (9): a43-9= 3604.
DEBUG (9): b43-9= 22544.
DEBUG (25): packet received from 26.
DEBUG (25): r2625= 0.
DEBUG (25): ws1= 4.
DEBUG (25): ws2= 4.
DEBUG (25): temppkt1= 6.
DEBUG (25): wa1= 5440.
DEBUG (25): wb1= 8260.
DEBUG (25): wa2= 0.544000.
DEBUG (25): wb2= 0.826000.
DEBUG (25): a1= 0.
DEBUG (25): temppkt->n1= 6.
DEBUG (25): temppkt->n2= 100.
DEBUG (25): temppkt->n3= 100.
DEBUG (25): temppkt->n4= 100.
DEBUG (25): temppkt->n5= 100.
DEBUG (25): temppkt->n6= 100.
DEBUG (25): m26-25= 0.654490.
DEBUG (25): n26-25= 0.682689.
DEBUG (25): a26-25= 35651.
DEBUG (25): b26-25= 54131.
DEBUG (47): packet received from 48.
DEBUG (47): r4847= 0.
DEBUG (47): ws1= 4.
DEBUG (47): ws2= 4.
DEBUG (47): temppkt1= 9.
DEBUG (47): wa1= 8780.
DEBUG (47): wb1= 9160.
DEBUG (47): wa2= 0.878000.
DEBUG (47): wb2= 0.916000.
DEBUG (47): a1= 0.
DEBUG (47): temppkt->n1= 9.
DEBUG (47): temppkt->n2= 100.
DEBUG (47): temppkt->n3= 100.
DEBUG (47): temppkt->n4= 100.
DEBUG (47): temppkt->n5= 100.
DEBUG (47): temppkt->n6= 100.
DEBUG (47): m48-47= 0.987845.
DEBUG (47): n48-47= 0.991699.
DEBUG (47): a48-47= 57539.
DEBUG (47): b48-47= 60030.
DEBUG (36): packet received from 48.
DEBUG (36): r374836= 0.
DEBUG (36): r3736= 0.
DEBUG (36): r4836= 0.
DEBUG (36): s36[0]= 0.513500.
DEBUG (36): s36[1]= 1.000000.
DEBUG (36): s36[2]= 0.000000.
DEBUG (36): s36[3]= 0.416700.
DEBUG (36): ws1= 4.
DEBUG (36): ws2= 4.
DEBUG (36): temppkt1= 9.
DEBUG (36): wa1= 8500.
DEBUG (36): wb1= 8780.
DEBUG (36): temppkt2= 8.
DEBUG (36): wa1= 5000.
DEBUG (36): wb1= 7800.
DEBUG (36): wa2= 0.500000.
DEBUG (36): wb2= 0.780000.
DEBUG (36): temppkt->n1= 9.
DEBUG (36): temppkt->n2= 8.
DEBUG (36): temppkt->n3= 100.
DEBUG (36): temppkt->n4= 100.
DEBUG (36): temppkt->n5= 100.
DEBUG (36): temppkt->n6= 100.
DEBUG (36): m48-36= 0.985092.
DEBUG (36): n48-36= 0.987845.
DEBUG (36): a48-36= 32767.
DEBUG (36): b48-36= 51117.
DEBUG (24): packet received from 35.
DEBUG (24): r253524= 0.
DEBUG (24): r2524= 0.
DEBUG (24): r3524= 0.
DEBUG (24): s24[0]= 0.511600.
DEBUG (24): s24[1]= 1.000000.
DEBUG (24): s24[2]= 0.000000.
DEBUG (24): s24[3]= 0.448300.
DEBUG (24): ws1= 4.
DEBUG (24): ws2= 4.
DEBUG (24): wa2= 0.217900.
DEBUG (24): wb2= 0.321900.
DEBUG (24): temppkt->n1= 8.
DEBUG (24): temppkt->n2= 100.
DEBUG (24): temppkt->n3= 100.
DEBUG (24): temppkt->n4= 100.
DEBUG (24): temppkt->n5= 100.
DEBUG (24): temppkt->n6= 100.
DEBUG (24): m35-24= 0.217990.
DEBUG (24): n35-24= 0.321995.
DEBUG (24): a35-24= 14280.
DEBUG (24): b35-24= 21095.
DEBUG (33): packet received from 34.
DEBUG (33): r3433= 0.
DEBUG (33): ws1= 4.
DEBUG (33): ws2= 4.
DEBUG (33): wa2= 0.779500.
DEBUG (33): wb2= 0.804400.
DEBUG (33): temppkt->n1= 100.
DEBUG (33): temppkt->n2= 100.
DEBUG (33): temppkt->n3= 100.
DEBUG (33): temppkt->n4= 100.
DEBUG (33): temppkt->n5= 100.
DEBUG (33): temppkt->n6= 100.
DEBUG (33): m34-33= 0.779599.
DEBUG (33): n34-33= 0.804486.
DEBUG (33): a34-33= 51084.
DEBUG (33): b34-33= 52716.
DEBUG (45): packet received from 46.
DEBUG (45): r4645= 0.
DEBUG (45): ws1= 4.
DEBUG (45): ws2= 4.
DEBUG (45): temppkt1= 9.
DEBUG (45): wa1= 6680.
DEBUG (45): wb1= 7340.
DEBUG (45): wa2= 0.668000.
DEBUG (45): wb2= 0.734000.
DEBUG (45): a1= 0.
DEBUG (45): temppkt->n1= 9.
DEBUG (45): temppkt->n2= 100.
DEBUG (45): temppkt->n3= 100.
DEBUG (45): temppkt->n4= 100.
DEBUG (45): temppkt->n5= 100.
DEBUG (45): temppkt->n6= 100.
DEBUG (45): m46-45= 0.966879.
DEBUG (45): n46-45= 0.973495.
DEBUG (45): a46-45= 43777.
DEBUG (45): b46-45= 48102.
DEBUG (17): packet received from 18.
DEBUG (17): r1817= 0.
DEBUG (17): ws1= 4.
DEBUG (17): ws2= 4.
DEBUG (17): wa2= 0.720900.
DEBUG (17): wb2= 0.830900.
DEBUG (17): temppkt->n1= 9.
DEBUG (17): temppkt->n2= 100.
DEBUG (17): temppkt->n3= 100.
DEBUG (17): temppkt->n4= 100.
DEBUG (17): temppkt->n5= 100.
DEBUG (17): temppkt->n6= 100.
DEBUG (17): m18-17= 0.720989.
DEBUG (17): n18-17= 0.830991.
DEBUG (17): a18-17= 47244.
DEBUG (17): b18-17= 54453.
DEBUG (1): packet received from 3.
DEBUG (1): r341= 0.
DEBUG (1): r31= 0.
DEBUG (1): r41= 0.
DEBUG (1): s1[0]= 0.000000.
DEBUG (1): s1[1]= 1.000000.
DEBUG (1): s1[2]= 0.000000.
DEBUG (1): s1[3]= 1.000000.
DEBUG (1): ws1= 4.
DEBUG (1): ws2= 4.
DEBUG (1): temppkt1= 1.
DEBUG (1): wa1= 3910.
DEBUG (1): wb1= 9550.
DEBUG (1): wa2= 0.391000.
DEBUG (1): wb2= 0.955000.
DEBUG (1): a1= 0.
DEBUG (1): temppkt->n1= 1.
DEBUG (1): temppkt->n2= 100.
DEBUG (1): temppkt->n3= 100.
DEBUG (1): temppkt->n4= 100.
DEBUG (1): temppkt->n5= 100.
DEBUG (1): temppkt->n6= 100.
DEBUG (1): m3-1= 0.139193.
DEBUG (1): n3-1= 0.195590.
DEBUG (1): a3-1= 25624.
DEBUG (1): b3-1= 62585.
DEBUG (2): packet received from 6.
DEBUG (2): r62= 0.
DEBUG (2): ws1= 4.
DEBUG (2): ws2= 4.
DEBUG (2): wa2= 0.659900.
DEBUG (2): wb2= 0.797900.
DEBUG (2): temppkt->n1= 5.
DEBUG (2): temppkt->n2= 100.
DEBUG (2): temppkt->n3= 100.
DEBUG (2): temppkt->n4= 100.
DEBUG (2): temppkt->n5= 100.
DEBUG (2): temppkt->n6= 100.
DEBUG (2): m6-2= 0.659998.
DEBUG (2): n6-2= 0.797986.
DEBUG (2): a6-2= 43246.
DEBUG (2): b6-2= 52290.
DEBUG (36): packet received from 37.
DEBUG (36): r374836= 0.
DEBUG (36): r3736= 0.
DEBUG (36): r4836= 0.
DEBUG (36): s36[0]= 0.513500.
DEBUG (36): s36[1]= 1.000000.
DEBUG (36): s36[2]= 0.000000.
DEBUG (36): s36[3]= 0.416700.
DEBUG (36): ws1= 4.
DEBUG (36): ws2= 4.
DEBUG (36): temppkt1= 8.
DEBUG (36): wa1= 5310.
DEBUG (36): wb1= 6070.
DEBUG (36): wa2= 0.531000.
DEBUG (36): wb2= 0.607000.
DEBUG (36): a1= 0.
DEBUG (36): temppkt->n1= 8.
DEBUG (36): temppkt->n2= 100.
DEBUG (36): temppkt->n3= 100.
DEBUG (36): temppkt->n4= 100.
DEBUG (36): temppkt->n5= 100.
DEBUG (36): temppkt->n6= 100.
DEBUG (36): m37-36= 0.853153.
DEBUG (36): n37-36= 0.860792.
DEBUG (36): a37-36= 34799.
DEBUG (36): b37-36= 39779.
DEBUG (26): packet received from 37.
DEBUG (26): r273726= 0.
DEBUG (26): r2726= 0.
DEBUG (26): r3726= 0.
DEBUG (26): s26[0]= 0.545500.
DEBUG (26): s26[1]= 1.000000.
DEBUG (26): s26[2]= 0.000000.
DEBUG (26): s26[3]= 0.513500.
DEBUG (26): ws1= 4.
DEBUG (26): ws2= 4.
DEBUG (26): temppkt1= 8.
DEBUG (26): wa1= 4500.
DEBUG (26): wb1= 5310.
DEBUG (26): wa2= 0.450000.
DEBUG (26): wb2= 0.531000.
DEBUG (26): a1= 0.
DEBUG (26): temppkt->n1= 8.
DEBUG (26): temppkt->n2= 100.
DEBUG (26): temppkt->n3= 100.
DEBUG (26): temppkt->n4= 100.
DEBUG (26): temppkt->n5= 100.
DEBUG (26): temppkt->n6= 100.
DEBUG (26): m37-26= 0.845090.
DEBUG (26): n37-26= 0.853153.
DEBUG (26): a37-26= 29490.
DEBUG (26): b37-26= 34799.
DEBUG (10): packet received from 23.
DEBUG (10): r112310= 0.
DEBUG (10): r1110= 0.
DEBUG (10): r2310= 0.
DEBUG (10): s10[0]= 0.000000.
DEBUG (10): s10[1]= 1.000000.
DEBUG (10): s10[2]= 0.000000.
DEBUG (10): s10[3]= 0.485700.
DEBUG (10): ws1= 3.
DEBUG (10): ws2= 4.
DEBUG (10): wa2= 0.029900.
DEBUG (10): wb2= 0.166900.
DEBUG (10): temppkt->n1= 6.
DEBUG (10): temppkt->n2= 100.
DEBUG (10): temppkt->n3= 100.
DEBUG (10): temppkt->n4= 100.
DEBUG (10): temppkt->n5= 100.
DEBUG (10): temppkt->n6= 100.
DEBUG (10): m23-10= 0.029999.
DEBUG (10): n23-10= 0.166960.
DEBUG (10): a23-10= 1959.
DEBUG (10): b23-10= 10937.
DEBUG (44): packet received from 45.
DEBUG (44): r4544= 0.
DEBUG (44): ws1= 4.
DEBUG (44): ws2= 4.
DEBUG (44): wa2= 0.667900.
DEBUG (44): wb2= 0.733900.
DEBUG (44): temppkt->n1= 9.
DEBUG (44): temppkt->n2= 100.
DEBUG (44): temppkt->n3= 100.
DEBUG (44): temppkt->n4= 100.
DEBUG (44): temppkt->n5= 100.
DEBUG (44): temppkt->n6= 100.
DEBUG (44): m45-44= 0.667994.
DEBUG (44): n45-44= 0.733989.
DEBUG (44): a45-44= 43770.
DEBUG (44): b45-44= 48096.
DEBUG (30): packet received from 31.
DEBUG (30): r314130= 0.
DEBUG (30): r3130= 0.
DEBUG (30): r4130= 0.
DEBUG (30): s30[0]= 0.000000.
DEBUG (30): s30[1]= 0.400000.
DEBUG (30): s30[2]= 0.000000.
DEBUG (30): s30[3]= 0.473700.
DEBUG (30): ws1= 4.
DEBUG (30): ws2= 4.
DEBUG (30): wa2= 0.409900.
DEBUG (30): wb2= 0.597900.
DEBUG (30): temppkt->n1= 7.
DEBUG (30): temppkt->n2= 5.
DEBUG (30): temppkt->n3= 100.
DEBUG (30): temppkt->n4= 100.
DEBUG (30): temppkt->n5= 100.
DEBUG (30): temppkt->n6= 100.
DEBUG (30): m31-30= 0.409995.
DEBUG (30): n31-30= 0.597992.
DEBUG (30): a31-30= 26862.
DEBUG (30): b31-30= 39183.
DEBUG (50): packet received from 1.
DEBUG (50): sourceid= 3.
DEBUG (50): r1250= 0.
DEBUG (50): r150= 0.
DEBUG (50): r250= 0.
DEBUG (50): s50[0]= 0.000000.
DEBUG (50): s50[1]= 1.000000.
DEBUG (50): s50[2]= 0.000000.
DEBUG (50): s50[3]= 1.000000.
DEBUG (50): a1= 25624.
DEBUG (50): b1= 62585.
DEBUG (50): btrpkt->n1= 1.
DEBUG (50): btrpkt->n2= 100.
DEBUG (50): btrpkt->n3= 100.
DEBUG (50): btrpkt->n4= 100.
DEBUG (50): btrpkt->n5= 100.
DEBUG (50): btrpkt->n6= 100.
DEBUG (50): ws1= 4.
DEBUG (50): ws2= 4.
DEBUG (50): wa2= 0.390900.
DEBUG (50): wb2= 0.954900.
DEBUG (50): btrpkt->n1= 1.
DEBUG (50): btrpkt->n2= 100.
DEBUG (50): btrpkt->n3= 100.
DEBUG (50): btrpkt->n4= 100.
DEBUG (50): btrpkt->n5= 100.
DEBUG (50): btrpkt->n6= 100.
DEBUG (50): m= 0.390997.
DEBUG (50): n= 0.954986.
DEBUG (50): a2= 25617.
DEBUG (50): b2= 62579.
DEBUG (5): packet received from 8.
DEBUG (5): r895= 0.
DEBUG (5): r85= 0.
DEBUG (5): r95= 0.
DEBUG (5): s5[0]= 0.409100.
DEBUG (5): s5[1]= 1.000000.
DEBUG (5): s5[2]= 0.000000.
DEBUG (5): s5[3]= 0.231900.
DEBUG (5): ws1= 4.
DEBUG (5): ws2= 4.
DEBUG (5): wa2= 0.359600.
DEBUG (5): wb2= 0.491900.
DEBUG (5): temppkt->n1= 5.
DEBUG (5): temppkt->n2= 100.
DEBUG (5): temppkt->n3= 100.
DEBUG (5): temppkt->n4= 100.
DEBUG (5): temppkt->n5= 100.
DEBUG (5): temppkt->n6= 100.
DEBUG (5): m8-5= 0.359634.
DEBUG (5): n8-5= 0.491997.
DEBUG (5): a8-5= 23566.
DEBUG (5): b8-5= 32236.
DEBUG (4): packet received from 8.
DEBUG (4): r5784= 0.
DEBUG (4): r54= 0.
DEBUG (4): r74= 0.
DEBUG (4): r84= 0.
DEBUG (4): s4[0]= 0.000000.
DEBUG (4): s4[1]= 1.000000.
DEBUG (4): s4[2]= 0.548400.
DEBUG (4): s4[3]= 1.000000.
DEBUG (4): s4[4]= 0.000000.
DEBUG (4): s4[5]= 0.409100.
DEBUG (4): ws1= 4.
DEBUG (4): ws2= 4.
DEBUG (4): wa2= 0.267900.
DEBUG (4): wb2= 0.359600.
DEBUG (4): temppkt->n1= 5.
DEBUG (4): temppkt->n2= 100.
DEBUG (4): temppkt->n3= 100.
DEBUG (4): temppkt->n4= 100.
DEBUG (4): temppkt->n5= 100.
DEBUG (4): temppkt->n6= 100.
DEBUG (4): m8-4= 0.267994.
DEBUG (4): n8-4= 0.359634.
DEBUG (4): a8-4= 17556.
DEBUG (4): b8-4= 23566.
DEBUG (39): packet received from 49.
DEBUG (39): r404939= 0.
DEBUG (39): r4039= 0.
DEBUG (39): r4939= 0.
DEBUG (39): s39[0]= 0.000000.
DEBUG (39): s39[1]= 1.000000.
DEBUG (39): s39[2]= 0.000000.
DEBUG (39): s39[3]= 0.428600.
DEBUG (39): ws1= 4.
DEBUG (39): ws2= 4.
DEBUG (39): temppkt1= 9.
DEBUG (39): wa1= 9160.
DEBUG (39): wb1= 9520.
DEBUG (39): temppkt2= 9.
DEBUG (39): wa1= 1600.
DEBUG (39): wb1= 5200.
DEBUG (39): wa2= 0.160000.
DEBUG (39): wb2= 0.520000.
DEBUG (39): temppkt->n1= 9.
DEBUG (39): temppkt->n2= 9.
DEBUG (39): temppkt->n3= 100.
DEBUG (39): temppkt->n4= 100.
DEBUG (39): temppkt->n5= 100.
DEBUG (39): temppkt->n6= 100.
DEBUG (39): m49-39= 0.991699.
DEBUG (39): n49-39= 0.995257.
DEBUG (39): a49-39= 10485.
DEBUG (39): b49-39= 34078.
DEBUG (48): packet received from 49.
DEBUG (48): r4948= 0.
DEBUG (48): ws1= 4.
DEBUG (48): ws2= 5.
DEBUG (48): wa2= 0.995200.
DEBUG (48): wb2= 1.000000.
DEBUG (48): temppkt->n1= 100.
DEBUG (48): temppkt->n2= 100.
DEBUG (48): temppkt->n3= 100.
DEBUG (48): temppkt->n4= 100.
DEBUG (48): temppkt->n5= 100.
DEBUG (48): temppkt->n6= 100.
DEBUG (48): m49-48= 0.995257.
DEBUG (48): n49-48= 1.000000.
DEBUG (48): a49-48= 65220.
DEBUG (48): b49-48= 65535.
DEBUG (24): packet received from 25.
DEBUG (24): r253524= 0.
DEBUG (24): r2524= 0.
DEBUG (24): r3524= 0.
DEBUG (24): s24[0]= 0.511600.
DEBUG (24): s24[1]= 1.000000.
DEBUG (24): s24[2]= 0.000000.
DEBUG (24): s24[3]= 0.448300.
DEBUG (24): ws1= 4.
DEBUG (24): ws2= 4.
DEBUG (24): wa2= 0.688200.
DEBUG (24): wb2= 0.825900.
DEBUG (24): temppkt->n1= 6.
DEBUG (24): temppkt->n2= 100.
DEBUG (24): temppkt->n3= 100.
DEBUG (24): temppkt->n4= 100.
DEBUG (24): temppkt->n5= 100.
DEBUG (24): temppkt->n6= 100.
DEBUG (24): m25-24= 0.688264.
DEBUG (24): n25-24= 0.825986.
DEBUG (24): a25-24= 45101.
DEBUG (24): b25-24= 54125.
DEBUG (28): packet received from 29.
DEBUG (28): r293928= 0.
DEBUG (28): r2928= 0.
DEBUG (28): r3928= 0.
DEBUG (28): s28[0]= 0.541700.
DEBUG (28): s28[1]= 1.000000.
DEBUG (28): s28[2]= 0.000000.
DEBUG (28): s28[3]= 0.464300.
DEBUG (28): ws1= 4.
DEBUG (28): ws2= 4.
DEBUG (28): temppkt1= 7.
DEBUG (28): wa1= 2370.
DEBUG (28): wb1= 2900.
DEBUG (28): temppkt2= 2.
DEBUG (28): wa1= 3700.
DEBUG (28): wb1= 9000.
DEBUG (28): wa2= 0.370000.
DEBUG (28): wb2= 0.900000.
DEBUG (28): temppkt->n1= 7.
DEBUG (28): temppkt->n2= 2.
DEBUG (28): temppkt->n3= 100.
DEBUG (28): temppkt->n4= 100.
DEBUG (28): temppkt->n5= 100.
DEBUG (28): temppkt->n6= 100.
DEBUG (28): m29-28= 0.723777.
DEBUG (28): n29-28= 0.729091.
DEBUG (28): a29-28= 24247.
DEBUG (28): b29-28= 58981.
DEBUG (43): packet received from 33.
DEBUG (43): r334443= 0.
DEBUG (43): r3343= 0.
DEBUG (43): r4443= 0.
DEBUG (43): s43[0]= 0.561000.
DEBUG (43): s43[1]= 1.000000.
DEBUG (43): s43[2]= 0.000000.
DEBUG (43): s43[3]= 1.000000.
DEBUG (43): ws1= 4.
DEBUG (43): ws2= 4.
DEBUG (43): temppkt1= 7.
DEBUG (43): wa1= 9340.
DEBUG (43): wb1= 7940.
DEBUG (43): wa2= 0.934000.
DEBUG (43): wb2= 0.794000.
DEBUG (43): a1= 0.
DEBUG (43): temppkt->n1= 7.
DEBUG (43): temppkt->n2= 100.
DEBUG (43): temppkt->n3= 100.
DEBUG (43): temppkt->n4= 100.
DEBUG (43): temppkt->n5= 100.
DEBUG (43): temppkt->n6= 100.
DEBUG (43): m33-43= 0.793462.
DEBUG (43): n33-43= 0.779492.
DEBUG (43): a33-43= 61209.
DEBUG (43): b33-43= 52034.
DEBUG (41): packet received from 42.
DEBUG (41): r4241= 0.
DEBUG (41): ws1= 4.
DEBUG (41): ws2= 4.
DEBUG (41): wa2= 0.897200.
DEBUG (41): wb2= 0.905500.
DEBUG (41): temppkt->n1= 100.
DEBUG (41): temppkt->n2= 100.
DEBUG (41): temppkt->n3= 100.
DEBUG (41): temppkt->n4= 100.
DEBUG (41): temppkt->n5= 100.
DEBUG (41): temppkt->n6= 100.
DEBUG (41): m42-41= 0.897292.
DEBUG (41): n42-41= 0.905592.
DEBUG (41): a42-41= 58798.
DEBUG (41): b42-41= 59341.
DEBUG (10): packet received from 11.
DEBUG (10): r112310= 0.
DEBUG (10): r1110= 0.
DEBUG (10): r2310= 0.
DEBUG (10): s10[0]= 0.000000.
DEBUG (10): s10[1]= 1.000000.
DEBUG (10): s10[2]= 0.000000.
DEBUG (10): s10[3]= 0.485700.
DEBUG (10): ws1= 4.
DEBUG (10): ws2= 4.
DEBUG (10): wa2= 0.689700.
DEBUG (10): wb2= 0.732300.
DEBUG (10): temppkt->n1= 100.
DEBUG (10): temppkt->n2= 100.
DEBUG (10): temppkt->n3= 100.
DEBUG (10): temppkt->n4= 100.
DEBUG (10): temppkt->n5= 100.
DEBUG (10): temppkt->n6= 100.
DEBUG (10): m11-10= 0.689799.
DEBUG (10): n11-10= 0.732387.
DEBUG (10): a11-10= 45199.
DEBUG (10): b11-10= 47991.
DEBUG (46): packet received from 47.
DEBUG (46): r4746= 0.
DEBUG (46): ws1= 4.
DEBUG (46): ws2= 4.
DEBUG (46): wa2= 0.877900.
DEBUG (46): wb2= 0.915900.
DEBUG (46): temppkt->n1= 9.
DEBUG (46): temppkt->n2= 100.
DEBUG (46): temppkt->n3= 100.
DEBUG (46): temppkt->n4= 100.
DEBUG (46): temppkt->n5= 100.
DEBUG (46): temppkt->n6= 100.
DEBUG (46): m47-46= 0.877989.
DEBUG (46): n47-46= 0.915999.
DEBUG (46): a47-46= 57533.
DEBUG (46): b47-46= 60023.
DEBUG (9): packet received from 43.
DEBUG (9): r439= 0.
DEBUG (9): ws1= 4.
DEBUG (9): ws2= 4.
DEBUG (9): wa2= 0.933900.
DEBUG (9): wb2= 0.793900.
DEBUG (9): temppkt->n1= 7.
DEBUG (9): temppkt->n2= 100.
DEBUG (9): temppkt->n3= 100.
DEBUG (9): temppkt->n4= 100.
DEBUG (9): temppkt->n5= 100.
DEBUG (9): temppkt->n6= 100.
DEBUG (9): m43-9= 0.933989.
DEBUG (9): n43-9= 0.793988.
DEBUG (9): a43-9= 61203.
DEBUG (9): b43-9= 52028.
DEBUG (7): packet received from 22.
DEBUG (7): r10227= 0.
DEBUG (7): r107= 0.
DEBUG (7): r227= 0.
DEBUG (7): s7[0]= 0.000000.
DEBUG (7): s7[1]= 1.000000.
DEBUG (7): s7[2]= 0.000000.
DEBUG (7): s7[3]= 1.000000.
DEBUG (7): ws1= 4.
DEBUG (7): ws2= 4.
DEBUG (7): temppkt1= 5.
DEBUG (7): wa1= 4920.
DEBUG (7): wb1= 8320.
DEBUG (7): wa2= 0.492000.
DEBUG (7): wb2= 0.832000.
DEBUG (7): a1= 0.
DEBUG (7): temppkt->n1= 5.
DEBUG (7): temppkt->n2= 100.
DEBUG (7): temppkt->n3= 100.
DEBUG (7): temppkt->n4= 100.
DEBUG (7): temppkt->n5= 100.
DEBUG (7): temppkt->n6= 100.
DEBUG (7): m22-7= 0.549294.
DEBUG (7): n22-7= 0.583291.
DEBUG (7): a22-7= 32243.
DEBUG (7): b22-7= 54525.
DEBUG (50): packet received from 2.
DEBUG (50): sourceid= 9.
DEBUG (50): r1250= 0.
DEBUG (50): r150= 0.
DEBUG (50): r250= 0.
DEBUG (50): s50[0]= 0.000000.
DEBUG (50): s50[1]= 1.000000.
DEBUG (50): s50[2]= 0.000000.
DEBUG (50): s50[3]= 1.000000.
DEBUG (50): a1= 43246.
DEBUG (50): b1= 52290.
DEBUG (50): btrpkt->n1= 5.
DEBUG (50): btrpkt->n2= 100.
DEBUG (50): btrpkt->n3= 100.
DEBUG (50): btrpkt->n4= 100.
DEBUG (50): btrpkt->n5= 100.
DEBUG (50): btrpkt->n6= 100.
DEBUG (50): ws1= 4.
DEBUG (50): ws2= 4.
DEBUG (50): wa2= 0.659800.
DEBUG (50): wb2= 0.797800.
DEBUG (50): btrpkt->n1= 5.
DEBUG (50): btrpkt->n2= 100.
DEBUG (50): btrpkt->n3= 100.
DEBUG (50): btrpkt->n4= 100.
DEBUG (50): btrpkt->n5= 100.
DEBUG (50): btrpkt->n6= 100.
DEBUG (50): m= 0.659892.
DEBUG (50): n= 0.797894.
DEBUG (50): a2= 43239.
DEBUG (50): b2= 52283.
DEBUG (6): packet received from 9.
DEBUG (6): r96= 0.
DEBUG (6): ws1= 4.
DEBUG (6): ws2= 4.
DEBUG (6): wa2= 0.901400.
DEBUG (6): wb2= 0.852700.
DEBUG (6): temppkt->n1= 7.
DEBUG (6): temppkt->n2= 100.
DEBUG (6): temppkt->n3= 100.
DEBUG (6): temppkt->n4= 100.
DEBUG (6): temppkt->n5= 100.
DEBUG (6): temppkt->n6= 100.
DEBUG (6): m9-6= 0.901432.
DEBUG (6): n9-6= 0.852739.
DEBUG (6): a9-6= 59073.
DEBUG (6): b9-6= 55881.
DEBUG (5): packet received from 9.
DEBUG (5): r895= 0.
DEBUG (5): r85= 0.
DEBUG (5): r95= 0.
DEBUG (5): s5[0]= 0.409100.
DEBUG (5): s5[1]= 1.000000.
DEBUG (5): s5[2]= 0.000000.
DEBUG (5): s5[3]= 0.231900.
DEBUG (5): ws1= 4.
DEBUG (5): ws2= 4.
DEBUG (5): temppkt2= 9.
DEBUG (5): wa1= 3380.
DEBUG (5): wb1= 140.
DEBUG (5): wa2= 0.338000.
DEBUG (5): wb2= 0.014000.
DEBUG (5): temppkt->n1= 7.
DEBUG (5): temppkt->n2= 9.
DEBUG (5): temppkt->n3= 100.
DEBUG (5): temppkt->n4= 100.
DEBUG (5): temppkt->n5= 100.
DEBUG (5): temppkt->n6= 100.
DEBUG (5): m9-5= 0.933898.
DEBUG (5): n9-5= 0.901432.
DEBUG (5): a9-5= 22150.
DEBUG (5): b9-5= 917.
DEBUG (21): packet received from 9.
DEBUG (21): r921= 0.
DEBUG (21): ws1= 4.
DEBUG (21): ws2= 4.
DEBUG (21): wa2= 0.852700.
DEBUG (21): wb2= 0.793800.
DEBUG (21): temppkt->n1= 7.
DEBUG (21): temppkt->n2= 100.
DEBUG (21): temppkt->n3= 100.
DEBUG (21): temppkt->n4= 100.
DEBUG (21): temppkt->n5= 100.
DEBUG (21): temppkt->n6= 100.
DEBUG (21): m9-21= 0.852739.
DEBUG (21): n9-21= 0.793896.
DEBUG (21): a9-21= 55881.
DEBUG (21): b9-21= 52021.
DEBUG (45): packet received from 46.
DEBUG (45): r4645= 0.
DEBUG (45): ws1= 4.
DEBUG (45): ws2= 4.
DEBUG (45): wa2= 0.895600.
DEBUG (45): wb2= 0.915800.
DEBUG (45): temppkt->n1= 9.
DEBUG (45): temppkt->n2= 100.
DEBUG (45): temppkt->n3= 100.
DEBUG (45): temppkt->n4= 100.
DEBUG (45): temppkt->n5= 100.
DEBUG (45): temppkt->n6= 100.
DEBUG (45): m46-45= 0.895630.
DEBUG (45): n46-45= 0.915892.
DEBUG (45): a46-45= 58693.
DEBUG (45): b46-45= 60016.
DEBUG (34): packet received from 46.
DEBUG (34): r354634= 0.
DEBUG (34): r3534= 0.
DEBUG (34): r4634= 0.
DEBUG (34): s34[0]= 0.448300.
DEBUG (34): s34[1]= 1.000000.
DEBUG (34): s34[2]= 0.000000.
DEBUG (34): s34[3]= 0.466700.
DEBUG (34): ws1= 4.
DEBUG (34): ws2= 4.
DEBUG (34): temppkt2= 8.
DEBUG (34): wa1= 7780.
DEBUG (34): wb1= 9560.
DEBUG (34): wa2= 0.778000.
DEBUG (34): wb2= 0.956000.
DEBUG (34): temppkt->n1= 9.
DEBUG (34): temppkt->n2= 8.
DEBUG (34): temppkt->n3= 100.
DEBUG (34): temppkt->n4= 100.
DEBUG (34): temppkt->n5= 100.
DEBUG (34): temppkt->n6= 100.
DEBUG (34): m46-34= 0.877897.
DEBUG (34): n46-34= 0.895630.
DEBUG (34): a46-34= 50986.
DEBUG (34): b46-34= 62651.
DEBUG (2): packet received from 6.
DEBUG (2): r62= 0.
DEBUG (2): ws1= 4.
DEBUG (2): ws2= 4.
DEBUG (2): wa2= 0.901300.
DEBUG (2): wb2= 0.852600.
DEBUG (2): temppkt->n1= 7.
DEBUG (2): temppkt->n2= 100.
DEBUG (2): temppkt->n3= 100.
DEBUG (2): temppkt->n4= 100.
DEBUG (2): temppkt->n5= 100.
DEBUG (2): temppkt->n6= 100.
DEBUG (2): m6-2= 0.901396.
DEBUG (2): n6-2= 0.852689.
DEBUG (2): a6-2= 59066.
DEBUG (2): b6-2= 55875.
DEBUG (1): packet received from 4.
DEBUG (1): r341= 0.
DEBUG (1): r31= 0.
DEBUG (1): r41= 0.
DEBUG (1): s1[0]= 0.000000.
DEBUG (1): s1[1]= 1.000000.
DEBUG (1): s1[2]= 0.000000.
DEBUG (1): s1[3]= 1.000000.
DEBUG (1): ws1= 4.
DEBUG (1): ws2= 4.
DEBUG (1): wa2= 0.267800.
DEBUG (1): wb2= 0.359500.
DEBUG (1): temppkt->n1= 5.
DEBUG (1): temppkt->n2= 100.
DEBUG (1): temppkt->n3= 100.
DEBUG (1): temppkt->n4= 100.
DEBUG (1): temppkt->n5= 100.
DEBUG (1): temppkt->n6= 100.
DEBUG (1): m4-1= 0.267887.
DEBUG (1): n4-1= 0.359594.
DEBUG (1): a4-1= 17550.
DEBUG (1): b4-1= 23559.
DEBUG (25): packet received from 26.
DEBUG (25): r2625= 0.
DEBUG (25): ws1= 4.
DEBUG (25): ws2= 4.
DEBUG (25): wa2= 0.449900.
DEBUG (25): wb2= 0.530900.
DEBUG (25): temppkt->n1= 8.
DEBUG (25): temppkt->n2= 100.
DEBUG (25): temppkt->n3= 100.
DEBUG (25): temppkt->n4= 100.
DEBUG (25): temppkt->n5= 100.
DEBUG (25): temppkt->n6= 100.
DEBUG (25): m26-25= 0.449989.
DEBUG (25): n26-25= 0.530999.
DEBUG (25): a26-25= 29484.
DEBUG (25): b26-25= 34792.
DEBUG (40): packet received from 41.
DEBUG (40): r4140= 0.
DEBUG (40): ws1= 4.
DEBUG (40): ws2= 4.
DEBUG (40): temppkt1= 9.
DEBUG (40): wa1= 110.
DEBUG (40): wb1= 540.
DEBUG (40): temppkt2= 0.
DEBUG (40): wa1= 1100.
DEBUG (40): wb1= 5400.
DEBUG (40): wa2= 0.110000.
DEBUG (40): wb2= 0.540000.
DEBUG (40): temppkt->n1= 9.
DEBUG (40): temppkt->n2= 0.
DEBUG (40): temppkt->n3= 100.
DEBUG (40): temppkt->n4= 100.
DEBUG (40): temppkt->n5= 100.
DEBUG (40): temppkt->n6= 100.
DEBUG (40): m41-40= 0.901125.
DEBUG (40): n41-40= 0.905486.
DEBUG (40): a41-40= 7208.
DEBUG (40): b41-40= 35388.
DEBUG (23): packet received from 24.
DEBUG (23): r2423= 0.
DEBUG (23): ws1= 4.
DEBUG (23): ws2= 4.
DEBUG (23): wa2= 0.688100.
DEBUG (23): wb2= 0.825800.
DEBUG (23): temppkt->n1= 6.
DEBUG (23): temppkt->n2= 100.
DEBUG (23): temppkt->n3= 100.
DEBUG (23): temppkt->n4= 100.
DEBUG (23): temppkt->n5= 100.
DEBUG (23): temppkt->n6= 100.
DEBUG (23): m24-23= 0.688197.
DEBUG (23): n24-23= 0.825895.
DEBUG (23): a24-23= 45094.
DEBUG (23): b24-23= 54118.
DEBUG (28): packet received from 39.
DEBUG (28): r293928= 0.
DEBUG (28): r2928= 0.
DEBUG (28): r3928= 0.
DEBUG (28): s28[0]= 0.541700.
DEBUG (28): s28[1]= 1.000000.
DEBUG (28): s28[2]= 0.000000.
DEBUG (28): s28[3]= 0.464300.
DEBUG (28): ws1= 4.
DEBUG (28): ws2= 4.
DEBUG (28): wa2= 0.159900.
DEBUG (28): wb2= 0.327100.
DEBUG (28): temppkt->n1= 9.
DEBUG (28): temppkt->n2= 9.
DEBUG (28): temppkt->n3= 100.
DEBUG (28): temppkt->n4= 100.
DEBUG (28): temppkt->n5= 100.
DEBUG (28): temppkt->n6= 100.
DEBUG (28): m39-28= 0.159991.
DEBUG (28): n39-28= 0.327142.
DEBUG (28): a39-28= 10479.
DEBUG (28): b39-28= 21436.
DEBUG (38): packet received from 39.
DEBUG (38): r3938= 0.
DEBUG (38): ws1= 4.
DEBUG (38): ws2= 4.
DEBUG (38): wa2= 0.327100.
DEBUG (38): wb2= 0.519900.
DEBUG (38): temppkt->n1= 9.
DEBUG (38): temppkt->n2= 9.
DEBUG (38): temppkt->n3= 100.
DEBUG (38): temppkt->n4= 100.
DEBUG (38): temppkt->n5= 100.
DEBUG (38): temppkt->n6= 100.
DEBUG (38): m39-38= 0.327142.
DEBUG (38): n39-38= 0.519997.
DEBUG (38): a39-38= 21436.
DEBUG (38): b39-38= 34071.
DEBUG (47): packet received from 48.
DEBUG (47): r4847= 0.
DEBUG (47): ws1= 4.
DEBUG (47): ws2= 5.
DEBUG (47): wa2= 0.997100.
DEBUG (47): wb2= 1.000000.
DEBUG (47): temppkt->n1= 100.
DEBUG (47): temppkt->n2= 100.
DEBUG (47): temppkt->n3= 100.
DEBUG (47): temppkt->n4= 100.
DEBUG (47): temppkt->n5= 100.
DEBUG (47): temppkt->n6= 100.
DEBUG (47): m48-47= 0.997196.
DEBUG (47): n48-47= 1.000000.
DEBUG (47): a48-47= 65344.
DEBUG (47): b48-47= 65535.
DEBUG (35): packet received from 36.
DEBUG (35): r3635= 0.
DEBUG (35): ws1= 4.
DEBUG (35): ws2= 4.
DEBUG (35): wa2= 0.530900.
DEBUG (35): wb2= 0.606900.
DEBUG (35): temppkt->n1= 8.
DEBUG (35): temppkt->n2= 100.
DEBUG (35): temppkt->n3= 100.
DEBUG (35): temppkt->n4= 100.
DEBUG (35): temppkt->n5= 100.
DEBUG (35): temppkt->n6= 100.
DEBUG (35): m36-35= 0.530999.
DEBUG (35): n36-35= 0.606989.
DEBUG (35): a36-35= 34792.
DEBUG (35): b36-35= 39773.
DEBUG (50): packet received from 1.
DEBUG (50): sourceid= 21.
DEBUG (50): r1250= 0.
DEBUG (50): r150= 0.
DEBUG (50): r250= 0.
DEBUG (50): s50[0]= 0.000000.
DEBUG (50): s50[1]= 1.000000.
DEBUG (50): s50[2]= 0.000000.
DEBUG (50): s50[3]= 1.000000.
DEBUG (50): a1= 17550.
DEBUG (50): b1= 23559.
DEBUG (50): btrpkt->n1= 5.
DEBUG (50): btrpkt->n2= 100.
DEBUG (50): btrpkt->n3= 100.
DEBUG (50): btrpkt->n4= 100.
DEBUG (50): btrpkt->n5= 100.
DEBUG (50): btrpkt->n6= 100.
DEBUG (50): ws1= 4.
DEBUG (50): ws2= 4.
DEBUG (50): wa2= 0.267700.
DEBUG (50): wb2= 0.359400.
DEBUG (50): btrpkt->n1= 5.
DEBUG (50): btrpkt->n2= 100.
DEBUG (50): btrpkt->n3= 100.
DEBUG (50): btrpkt->n4= 100.
DEBUG (50): btrpkt->n5= 100.
DEBUG (50): btrpkt->n6= 100.
DEBUG (50): m= 0.267796.
DEBUG (50): n= 0.359487.
DEBUG (50): a2= 17543.
DEBUG (50): b2= 23553.
DEBUG (8): packet received from 21.
DEBUG (8): r218= 0.
DEBUG (8): ws1= 4.
DEBUG (8): ws2= 4.
DEBUG (8): wa2= 0.852600.
DEBUG (8): wb2= 0.793700.
DEBUG (8): temppkt->n1= 7.
DEBUG (8): temppkt->n2= 100.
DEBUG (8): temppkt->n3= 100.
DEBUG (8): temppkt->n4= 100.
DEBUG (8): temppkt->n5= 100.
DEBUG (8): temppkt->n6= 100.
DEBUG (8): m21-8= 0.852689.
DEBUG (8): n21-8= 0.793790.
DEBUG (8): a21-8= 55875.
DEBUG (8): b21-8= 52015.
DEBUG (39): packet received from 40.
DEBUG (39): r404939= 0.
DEBUG (39): r4039= 0.
DEBUG (39): r4939= 0.
DEBUG (39): s39[0]= 0.000000.
DEBUG (39): s39[1]= 1.000000.
DEBUG (39): s39[2]= 0.000000.
DEBUG (39): s39[3]= 0.428600.
DEBUG (39): ws1= 4.
DEBUG (39): ws2= 4.
DEBUG (39): wa2= 0.109900.
DEBUG (39): wb2= 0.539900.
DEBUG (39): temppkt->n1= 9.
DEBUG (39): temppkt->n2= 0.
DEBUG (39): temppkt->n3= 100.
DEBUG (39): temppkt->n4= 100.
DEBUG (39): temppkt->n5= 100.
DEBUG (39): temppkt->n6= 100.
DEBUG (39): m40-39= 0.109987.
DEBUG (39): n40-39= 0.539986.
DEBUG (39): a40-39= 7202.
DEBUG (39): b40-39= 35382.
DEBUG (29): packet received from 30.
DEBUG (29): r3029= 0.
DEBUG (29): ws1= 4.
DEBUG (29): ws2= 4.
DEBUG (29): wa2= 0.409800.
DEBUG (29): wb2= 0.597800.
DEBUG (29): temppkt->n1= 7.
DEBUG (29): temppkt->n2= 5.
DEBUG (29): temppkt->n3= 100.
DEBUG (29): temppkt->n4= 100.
DEBUG (29): temppkt->n5= 100.
DEBUG (29): temppkt->n6= 100.
DEBUG (29): m30-29= 0.409888.
DEBUG (29): n30-29= 0.597894.
DEBUG (29): a30-29= 26856.
DEBUG (29): b30-29= 39176.
DEBUG (12): packet received from 25.
DEBUG (12): r132512= 0.
DEBUG (12): r1312= 0.
DEBUG (12): r2512= 0.
DEBUG (12): s12[0]= 0.000000.
DEBUG (12): s12[1]= 1.000000.
DEBUG (12): s12[2]= 0.000000.
DEBUG (12): s12[3]= 0.511600.
DEBUG (12): ws1= 4.
DEBUG (12): ws2= 4.
DEBUG (12): temppkt2= 4.
DEBUG (12): wa1= 4980.
DEBUG (12): wb1= 9130.
DEBUG (12): wa2= 0.498000.
DEBUG (12): wb2= 0.913000.
DEBUG (12): temppkt->n1= 8.
DEBUG (12): temppkt->n2= 4.
DEBUG (12): temppkt->n3= 100.
DEBUG (12): temppkt->n4= 100.
DEBUG (12): temppkt->n5= 100.
DEBUG (12): temppkt->n6= 100.
DEBUG (12): m25-12= 0.449897.
DEBUG (12): n25-12= 0.491334.
DEBUG (12): a25-12= 32636.
DEBUG (12): b25-12= 59833.
DEBUG (24): packet received from 25.
DEBUG (24): r253524= 0.
DEBUG (24): r2524= 0.
DEBUG (24): r3524= 0.
DEBUG (24): s24[0]= 0.511600.
DEBUG (24): s24[1]= 1.000000.
DEBUG (24): s24[2]= 0.000000.
DEBUG (24): s24[3]= 0.448300.
DEBUG (24): ws1= 4.
DEBUG (24): ws2= 4.
DEBUG (24): wa2= 0.491300.
DEBUG (24): wb2= 0.530800.
DEBUG (24): temppkt->n1= 8.
DEBUG (24): temppkt->n2= 100.
DEBUG (24): temppkt->n3= 100.
DEBUG (24): temppkt->n4= 100.
DEBUG (24): temppkt->n5= 100.
DEBUG (24): temppkt->n6= 100.
DEBUG (24): m25-24= 0.491334.
DEBUG (24): n25-24= 0.530892.
DEBUG (24): a25-24= 32197.
DEBUG (24): b25-24= 34785.
DEBUG (27): packet received from 28.
DEBUG (27): r2827= 0.
DEBUG (27): ws1= 4.
DEBUG (27): ws2= 4.
DEBUG (27): wa2= 0.159800.
DEBUG (27): wb2= 0.327000.
DEBUG (27): temppkt->n1= 9.
DEBUG (27): temppkt->n2= 9.
DEBUG (27): temppkt->n3= 100.
DEBUG (27): temppkt->n4= 100.
DEBUG (27): temppkt->n5= 100.
DEBUG (27): temppkt->n6= 100.
DEBUG (27): m28-27= 0.159899.
DEBUG (27): n28-27= 0.327092.
DEBUG (27): a28-27= 10472.
DEBUG (27): b28-27= 21429.
DEBUG (3): packet received from 7.
DEBUG (3): r73= 0.
DEBUG (3): ws1= 4.
DEBUG (3): ws2= 4.
DEBUG (3): wa2= 0.491900.
DEBUG (3): wb2= 0.678400.
DEBUG (3): temppkt->n1= 5.
DEBUG (3): temppkt->n2= 100.
DEBUG (3): temppkt->n3= 100.
DEBUG (3): temppkt->n4= 100.
DEBUG (3): temppkt->n5= 100.
DEBUG (3): temppkt->n6= 100.
DEBUG (3): m7-3= 0.491997.
DEBUG (3): n7-3= 0.678454.
DEBUG (3): a7-3= 32236.
DEBUG (3): b7-3= 44458.
DEBUG (46): packet received from 47.
DEBUG (46): r4746= 0.
DEBUG (46): ws1= 4.
DEBUG (46): ws2= 5.
DEBUG (46): wa2= 0.997000.
DEBUG (46): wb2= 1.000000.
DEBUG (46): temppkt->n1= 100.
DEBUG (46): temppkt->n2= 100.
DEBUG (46): temppkt->n3= 100.
DEBUG (46): temppkt->n4= 100.
DEBUG (46): temppkt->n5= 100.
DEBUG (46): temppkt->n6= 100.
DEBUG (46): m47-46= 0.997086.
DEBUG (46): n47-46= 1.000000.
DEBUG (46): a47-46= 65338.
DEBUG (46): b47-46= 65535.
DEBUG (28): packet received from 39.
DEBUG (28): r293928= 0.
DEBUG (28): r2928= 0.
DEBUG (28): r3928= 0.
DEBUG (28): s28[0]= 0.541700.
DEBUG (28): s28[1]= 1.000000.
DEBUG (28): s28[2]= 0.000000.
DEBUG (28): s28[3]= 0.464300.
DEBUG (28): ws1= 4.
DEBUG (28): ws2= 4.
DEBUG (28): wa2= 0.109800.
DEBUG (28): wb2= 0.309500.
DEBUG (28): temppkt->n1= 9.
DEBUG (28): temppkt->n2= 0.
DEBUG (28): temppkt->n3= 100.
DEBUG (28): temppkt->n4= 100.
DEBUG (28): temppkt->n5= 100.
DEBUG (28): temppkt->n6= 100.
DEBUG (28): m39-28= 0.109895.
DEBUG (28): n39-28= 0.309544.
DEBUG (28): a39-28= 7195.
DEBUG (28): b39-28= 20283.
DEBUG (10): packet received from 23.
DEBUG (10): r112310= 0.
DEBUG (10): r1110= 0.
DEBUG (10): r2310= 0.
DEBUG (10): s10[0]= 0.000000.
DEBUG (10): s10[1]= 1.000000.
DEBUG (10): s10[2]= 0.000000.
DEBUG (10): s10[3]= 0.485700.
DEBUG (10): ws1= 4.
DEBUG (10): ws2= 4.
DEBUG (10): wa2= 0.688000.
DEBUG (10): wb2= 0.754900.
DEBUG (10): temppkt->n1= 6.
DEBUG (10): temppkt->n2= 100.
DEBUG (10): temppkt->n3= 100.
DEBUG (10): temppkt->n4= 100.
DEBUG (10): temppkt->n5= 100.
DEBUG (10): temppkt->n6= 100.
DEBUG (10): m23-10= 0.688090.
DEBUG (10): n23-10= 0.754970.
DEBUG (10): a23-10= 45088.
DEBUG (10): b23-10= 49472.
DEBUG (22): packet received from 23.
DEBUG (22): r233322= 0.
DEBUG (22): r2322= 0.
DEBUG (22): r3322= 0.
DEBUG (22): s22[0]= 0.485700.
DEBUG (22): s22[1]= 1.000000.
DEBUG (22): s22[2]= 0.000000.
DEBUG (22): s22[3]= 0.561000.
DEBUG (22): ws1= 4.
DEBUG (22): ws2= 4.
DEBUG (22): wa2= 0.754900.
DEBUG (22): wb2= 0.825700.
DEBUG (22): temppkt->n1= 6.
DEBUG (22): temppkt->n2= 100.
DEBUG (22): temppkt->n3= 100.
DEBUG (22): temppkt->n4= 100.
DEBUG (22): temppkt->n5= 100.
DEBUG (22): temppkt->n6= 100.
DEBUG (22): m23-22= 0.754970.
DEBUG (22): n23-22= 0.825788.
DEBUG (22): a23-22= 49472.
DEBUG (22): b23-22= 54112.
DEBUG (50): packet received from 2.
DEBUG (50): sourceid= 34.
DEBUG (50): r1250= 0.
DEBUG (50): r150= 0.
DEBUG (50): r250= 0.
DEBUG (50): s50[0]= 0.000000.
DEBUG (50): s50[1]= 1.000000.
DEBUG (50): s50[2]= 0.000000.
DEBUG (50): s50[3]= 1.000000.
DEBUG (50): a1= 59066.
DEBUG (50): b1= 55875.
DEBUG (50): btrpkt->n1= 7.
DEBUG (50): btrpkt->n2= 100.
DEBUG (50): btrpkt->n3= 100.
DEBUG (50): btrpkt->n4= 100.
DEBUG (50): btrpkt->n5= 100.
DEBUG (50): btrpkt->n6= 100.
DEBUG (50): ws1= 4.
DEBUG (50): ws2= 4.
DEBUG (50): wa2= 0.901200.
DEBUG (50): wb2= 0.852500.
DEBUG (50): btrpkt->n1= 7.
DEBUG (50): btrpkt->n2= 100.
DEBUG (50): btrpkt->n3= 100.
DEBUG (50): btrpkt->n4= 100.
DEBUG (50): btrpkt->n5= 100.
DEBUG (50): btrpkt->n6= 100.
DEBUG (50): m= 0.901289.
DEBUG (50): n= 0.852598.
DEBUG (50): a2= 59060.
DEBUG (50): b2= 55868.
DEBUG (44): packet received from 45.
DEBUG (44): r4544= 0.
DEBUG (44): ws1= 4.
DEBUG (44): ws2= 4.
DEBUG (44): wa2= 0.895500.
DEBUG (44): wb2= 0.915700.
DEBUG (44): temppkt->n1= 9.
DEBUG (44): temppkt->n2= 100.
DEBUG (44): temppkt->n3= 100.
DEBUG (44): temppkt->n4= 100.
DEBUG (44): temppkt->n5= 100.
DEBUG (44): temppkt->n6= 100.
DEBUG (44): m45-44= 0.895598.
DEBUG (44): n45-44= 0.915785.
DEBUG (44): a45-44= 58686.
DEBUG (44): b45-44= 60010.
DEBUG (28): packet received from 29.
DEBUG (28): r293928= 0.
DEBUG (28): r2928= 0.
DEBUG (28): r3928= 0.
DEBUG (28): s28[0]= 0.541700.
DEBUG (28): s28[1]= 1.000000.
DEBUG (28): s28[2]= 0.000000.
DEBUG (28): s28[3]= 0.464300.
DEBUG (28): ws1= 4.
DEBUG (28): ws2= 4.
DEBUG (28): temppkt3= 5.
DEBUG (28): wa1= 1160.
DEBUG (28): wb1= 9770.
DEBUG (28): wa2= 0.116000.
DEBUG (28): wb2= 0.977000.
DEBUG (28): temppkt->n1= 7.
DEBUG (28): temppkt->n2= 5.
DEBUG (28): temppkt->n3= 5.
DEBUG (28): temppkt->n4= 100.
DEBUG (28): temppkt->n5= 100.
DEBUG (28): temppkt->n6= 100.
DEBUG (28): m29-28= 0.511631.
DEBUG (28): n29-28= 0.597787.
DEBUG (28): a29-28= 7602.
DEBUG (28): b29-28= 64027.
DEBUG (16): packet received from 29.
DEBUG (16): r172916= 0.
DEBUG (16): r1716= 0.
DEBUG (16): r2916= 0.
DEBUG (16): s16[0]= 0.000000.
DEBUG (16): s16[1]= 1.000000.
DEBUG (16): s16[2]= 0.000000.
DEBUG (16): s16[3]= 0.541700.
DEBUG (16): ws1= 4.
DEBUG (16): ws2= 4.
DEBUG (16): wa2= 0.409700.
DEBUG (16): wb2= 0.511600.
DEBUG (16): temppkt->n1= 7.
DEBUG (16): temppkt->n2= 5.
DEBUG (16): temppkt->n3= 100.
DEBUG (16): temppkt->n4= 100.
DEBUG (16): temppkt->n5= 100.
DEBUG (16): temppkt->n6= 100.
DEBUG (16): m29-16= 0.409796.
DEBUG (16): n29-16= 0.511631.
DEBUG (16): a29-16= 26849.
DEBUG (16): b29-16= 33527.
DEBUG (37): packet received from 38.
DEBUG (37): r3837= 0.
DEBUG (37): ws1= 4.
DEBUG (37): ws2= 4.
DEBUG (37): wa2= 0.327000.
DEBUG (37): wb2= 0.519800.
DEBUG (37): temppkt->n1= 9.
DEBUG (37): temppkt->n2= 9.
DEBUG (37): temppkt->n3= 100.
DEBUG (37): temppkt->n4= 100.
DEBUG (37): temppkt->n5= 100.
DEBUG (37): temppkt->n6= 100.
DEBUG (37): m38-37= 0.327092.
DEBUG (37): n38-37= 0.519890.
DEBUG (37): a38-37= 21429.
DEBUG (37): b38-37= 34065.
DEBUG (23): packet received from 24.
DEBUG (23): r2423= 0.
DEBUG (23): ws1= 4.
DEBUG (23): ws2= 4.
DEBUG (23): wa2= 0.491200.
DEBUG (23): wb2= 0.530700.
DEBUG (23): temppkt->n1= 8.
DEBUG (23): temppkt->n2= 100.
DEBUG (23): temppkt->n3= 100.
DEBUG (23): temppkt->n4= 100.
DEBUG (23): temppkt->n5= 100.
DEBUG (23): temppkt->n6= 100.
DEBUG (23): m24-23= 0.491295.
DEBUG (23): n24-23= 0.530785.
DEBUG (23): a24-23= 32190.
DEBUG (23): b24-23= 34779.
DEBUG (15): packet received from 16.
DEBUG (15): r1615= 0.
DEBUG (15): ws1= 4.
DEBUG (15): ws2= 4.
DEBUG (15): wa2= 0.409600.
DEBUG (15): wb2= 0.511500.
DEBUG (15): temppkt->n1= 7.
DEBUG (15): temppkt->n2= 5.
DEBUG (15): temppkt->n3= 100.
DEBUG (15): temppkt->n4= 100.
DEBUG (15): temppkt->n5= 100.
DEBUG (15): temppkt->n6= 100.
DEBUG (15): m16-15= 0.409689.
DEBUG (15): n16-15= 0.511589.
DEBUG (15): a16-15= 26843.
DEBUG (15): b16-15= 33521.
DEBUG (7): packet received from 22.
DEBUG (7): r10227= 0.
DEBUG (7): r107= 0.
DEBUG (7): r227= 0.
DEBUG (7): s7[0]= 0.000000.
DEBUG (7): s7[1]= 1.000000.
DEBUG (7): s7[2]= 0.000000.
DEBUG (7): s7[3]= 1.000000.
DEBUG (7): ws1= 4.
DEBUG (7): ws2= 4.
DEBUG (7): wa2= 0.754800.
DEBUG (7): wb2= 0.825600.
DEBUG (7): temppkt->n1= 6.
DEBUG (7): temppkt->n2= 100.
DEBUG (7): temppkt->n3= 100.
DEBUG (7): temppkt->n4= 100.
DEBUG (7): temppkt->n5= 100.
DEBUG (7): temppkt->n6= 100.
DEBUG (7): m22-7= 0.754894.
DEBUG (7): n22-7= 0.825696.
DEBUG (7): a22-7= 49465.
DEBUG (7): b22-7= 54105.
DEBUG (36): packet received from 37.
DEBUG (36): r374836= 0.
DEBUG (36): r3736= 0.
DEBUG (36): r4836= 0.
DEBUG (36): s36[0]= 0.513500.
DEBUG (36): s36[1]= 1.000000.
DEBUG (36): s36[2]= 0.000000.
DEBUG (36): s36[3]= 0.416700.
DEBUG (36): ws1= 4.
DEBUG (36): ws2= 4.
DEBUG (36): wa2= 0.425900.
DEBUG (36): wb2= 0.519700.
DEBUG (36): temppkt->n1= 9.
DEBUG (36): temppkt->n2= 9.
DEBUG (36): temppkt->n3= 100.
DEBUG (36): temppkt->n4= 100.
DEBUG (36): temppkt->n5= 100.
DEBUG (36): temppkt->n6= 100.
DEBUG (36): m37-36= 0.425995.
DEBUG (36): n37-36= 0.519799.
DEBUG (36): a37-36= 27911.
DEBUG (36): b37-36= 34058.
DEBUG (14): packet received from 27.
DEBUG (14): r152714= 0.
DEBUG (14): r1514= 0.
DEBUG (14): r2714= 0.
DEBUG (14): s14[0]= 0.000000.
DEBUG (14): s14[1]= 1.000000.
DEBUG (14): s14[2]= 0.000000.
DEBUG (14): s14[3]= 0.545500.
DEBUG (14): ws1= 4.
DEBUG (14): ws2= 4.
DEBUG (14): wa2= 0.159700.
DEBUG (14): wb2= 0.250900.
DEBUG (14): temppkt->n1= 9.
DEBUG (14): temppkt->n2= 9.
DEBUG (14): temppkt->n3= 100.
DEBUG (14): temppkt->n4= 100.
DEBUG (14): temppkt->n5= 100.
DEBUG (14): temppkt->n6= 100.
DEBUG (14): m27-14= 0.159792.
DEBUG (14): n27-14= 0.250996.
DEBUG (14): a27-14= 10465.
DEBUG (14): b27-14= 16442.
DEBUG (4): packet received from 8.
DEBUG (4): r5784= 0.
DEBUG (4): r54= 0.
DEBUG (4): r74= 0.
DEBUG (4): r84= 0.
DEBUG (4): s4[0]= 0.000000.
DEBUG (4): s4[1]= 1.000000.
DEBUG (4): s4[2]= 0.548400.
DEBUG (4): s4[3]= 1.000000.
DEBUG (4): s4[4]= 0.000000.
DEBUG (4): s4[5]= 0.409100.
DEBUG (4): ws1= 4.
DEBUG (4): ws2= 4.
DEBUG (4): temppkt2= 8.
DEBUG (4): wa1= 5250.
DEBUG (4): wb1= 2850.
DEBUG (4): wa2= 0.525000.
DEBUG (4): wb2= 0.285000.
DEBUG (4): temppkt->n1= 7.
DEBUG (4): temppkt->n2= 8.
DEBUG (4): temppkt->n3= 100.
DEBUG (4): temppkt->n4= 100.
DEBUG (4): temppkt->n5= 100.
DEBUG (4): temppkt->n6= 100.
DEBUG (4): m8-4= 0.852598.
DEBUG (4): n8-4= 0.828502.
DEBUG (4): a8-4= 34405.
DEBUG (4): b8-4= 18677.
DEBUG (5): packet received from 8.
DEBUG (5): r895= 0.
DEBUG (5): r85= 0.
DEBUG (5): r95= 0.
DEBUG (5): s5[0]= 0.409100.
DEBUG (5): s5[1]= 1.000000.
DEBUG (5): s5[2]= 0.000000.
DEBUG (5): s5[3]= 0.231900.
DEBUG (5): ws1= 4.
DEBUG (5): ws2= 4.
DEBUG (5): wa2= 0.828500.
DEBUG (5): wb2= 0.793600.
DEBUG (5): temppkt->n1= 7.
DEBUG (5): temppkt->n2= 100.
DEBUG (5): temppkt->n3= 100.
DEBUG (5): temppkt->n4= 100.
DEBUG (5): temppkt->n5= 100.
DEBUG (5): temppkt->n6= 100.
DEBUG (5): m8-5= 0.828502.
DEBUG (5): n8-5= 0.793698.
DEBUG (5): a8-5= 54295.
DEBUG (5): b8-5= 52008.
DEBUG (24): packet received from 35.
DEBUG (24): r253524= 0.
DEBUG (24): r2524= 0.
DEBUG (24): r3524= 0.
DEBUG (24): s24[0]= 0.511600.
DEBUG (24): s24[1]= 1.000000.
DEBUG (24): s24[2]= 0.000000.
DEBUG (24): s24[3]= 0.448300.
DEBUG (24): ws1= 4.
DEBUG (24): ws2= 4.
DEBUG (24): temppkt2= 5.
DEBUG (24): wa1= 3080.
DEBUG (24): wb1= 6490.
DEBUG (24): wa2= 0.308000.
DEBUG (24): wb2= 0.649000.
DEBUG (24): temppkt->n1= 8.
DEBUG (24): temppkt->n2= 5.
DEBUG (24): temppkt->n3= 100.
DEBUG (24): temppkt->n4= 100.
DEBUG (24): temppkt->n5= 100.
DEBUG (24): temppkt->n6= 100.
DEBUG (24): m35-24= 0.530892.
DEBUG (24): n35-24= 0.564965.
DEBUG (24): a35-24= 20184.
DEBUG (24): b35-24= 42532.
DEBUG (3): packet received from 7.
DEBUG (3): r73= 0.
DEBUG (3): ws1= 4.
DEBUG (3): ws2= 4.
DEBUG (3): temppkt2= 7.
DEBUG (3): wa1= 5470.
DEBUG (3): wb1= 9360.
DEBUG (3): wa2= 0.547000.
DEBUG (3): wb2= 0.936000.
DEBUG (3): temppkt->n1= 6.
DEBUG (3): temppkt->n2= 7.
DEBUG (3): temppkt->n3= 100.
DEBUG (3): temppkt->n4= 100.
DEBUG (3): temppkt->n5= 100.
DEBUG (3): temppkt->n6= 100.
DEBUG (3): m7-3= 0.754788.
DEBUG (3): n7-3= 0.793615.
DEBUG (3): a7-3= 35847.
DEBUG (3): b7-3= 61340.
DEBUG (4): packet received from 7.
DEBUG (4): r5784= 0.
DEBUG (4): r54= 0.
DEBUG (4): r74= 0.
DEBUG (4): r84= 0.
DEBUG (4): s4[0]= 0.000000.
DEBUG (4): s4[1]= 1.000000.
DEBUG (4): s4[2]= 0.548400.
DEBUG (4): s4[3]= 1.000000.
DEBUG (4): s4[4]= 0.000000.
DEBUG (4): s4[5]= 0.409100.
DEBUG (4): ws1= 4.
DEBUG (4): ws2= 4.
DEBUG (4): wa2= 0.793600.
DEBUG (4): wb2= 0.825500.
DEBUG (4): temppkt->n1= 6.
DEBUG (4): temppkt->n2= 100.
DEBUG (4): temppkt->n3= 100.
DEBUG (4): temppkt->n4= 100.
DEBUG (4): temppkt->n5= 100.
DEBUG (4): temppkt->n6= 100.
DEBUG (4): m7-4= 0.793615.
DEBUG (4): n7-4= 0.825589.
DEBUG (4): a7-4= 52008.
DEBUG (4): b7-4= 54099.
DEBUG (27): packet received from 28.
DEBUG (27): r2827= 0.
DEBUG (27): ws1= 4.
DEBUG (27): ws2= 4.
DEBUG (27): wa2= 0.115900.
DEBUG (27): wb2= 0.976900.
DEBUG (27): temppkt->n1= 7.
DEBUG (27): temppkt->n2= 5.
DEBUG (27): temppkt->n3= 5.
DEBUG (27): temppkt->n4= 100.
DEBUG (27): temppkt->n5= 100.
DEBUG (27): temppkt->n6= 100.
DEBUG (27): m28-27= 0.115999.
DEBUG (27): n28-27= 0.976989.
DEBUG (27): a28-27= 7595.
DEBUG (27): b28-27= 64021.
DEBUG (7): packet received from 10.
DEBUG (7): r10227= 0.
DEBUG (7): r107= 0.
DEBUG (7): r227= 0.
DEBUG (7): s7[0]= 0.000000.
DEBUG (7): s7[1]= 1.000000.
DEBUG (7): s7[2]= 0.000000.
DEBUG (7): s7[3]= 1.000000.
DEBUG (7): ws1= 4.
DEBUG (7): ws2= 4.
DEBUG (7): wa2= 0.687900.
DEBUG (7): wb2= 0.754800.
DEBUG (7): temppkt->n1= 6.
DEBUG (7): temppkt->n2= 100.
DEBUG (7): temppkt->n3= 100.
DEBUG (7): temppkt->n4= 100.
DEBUG (7): temppkt->n5= 100.
DEBUG (7): temppkt->n6= 100.
DEBUG (7): m10-7= 0.687999.
DEBUG (7): n10-7= 0.754894.
DEBUG (7): a10-7= 45081.
DEBUG (7): b10-7= 49465.
DEBUG (22): packet received from 23.
DEBUG (22): r233322= 0.
DEBUG (22): r2322= 0.
DEBUG (22): r3322= 0.
DEBUG (22): s22[0]= 0.485700.
DEBUG (22): s22[1]= 1.000000.
DEBUG (22): s22[2]= 0.000000.
DEBUG (22): s22[3]= 0.561000.
DEBUG (22): ws1= 4.
DEBUG (22): ws2= 4.
DEBUG (22): temppkt2= 5.
DEBUG (22): wa1= 1030.
DEBUG (22): wb1= 3060.
DEBUG (22): wa2= 0.103000.
DEBUG (22): wb2= 0.306000.
DEBUG (22): temppkt->n1= 8.
DEBUG (22): temppkt->n2= 5.
DEBUG (22): temppkt->n3= 100.
DEBUG (22): temppkt->n4= 100.
DEBUG (22): temppkt->n5= 100.
DEBUG (22): temppkt->n6= 100.
DEBUG (22): m23-22= 0.510376.
DEBUG (22): n23-22= 0.530694.
DEBUG (22): a23-22= 6750.
DEBUG (22): b23-22= 20053.
DEBUG (14): packet received from 15.
DEBUG (14): r152714= 0.
DEBUG (14): r1514= 0.
DEBUG (14): r2714= 0.
DEBUG (14): s14[0]= 0.000000.
DEBUG (14): s14[1]= 1.000000.
DEBUG (14): s14[2]= 0.000000.
DEBUG (14): s14[3]= 0.545500.
DEBUG (14): ws1= 4.
DEBUG (14): ws2= 4.
DEBUG (14): wa2= 0.409500.
DEBUG (14): wb2= 0.511400.
DEBUG (14): temppkt->n1= 7.
DEBUG (14): temppkt->n2= 5.
DEBUG (14): temppkt->n3= 100.
DEBUG (14): temppkt->n4= 100.
DEBUG (14): temppkt->n5= 100.
DEBUG (14): temppkt->n6= 100.
DEBUG (14): m15-14= 0.409598.
DEBUG (14): n15-14= 0.511498.
DEBUG (14): a15-14= 26836.
DEBUG (14): b15-14= 33514.
DEBUG (4): packet received from 5.
DEBUG (4): r5784= 0.
DEBUG (4): r54= 0.
DEBUG (4): r74= 0.
DEBUG (4): r84= 0.
DEBUG (4): s4[0]= 0.000000.
DEBUG (4): s4[1]= 1.000000.
DEBUG (4): s4[2]= 0.548400.
DEBUG (4): s4[3]= 1.000000.
DEBUG (4): s4[4]= 0.000000.
DEBUG (4): s4[5]= 0.409100.
DEBUG (4): ws1= 4.
DEBUG (4): ws2= 4.
DEBUG (4): wa2= 0.828400.
DEBUG (4): wb2= 0.793500.
DEBUG (4): temppkt->n1= 7.
DEBUG (4): temppkt->n2= 100.
DEBUG (4): temppkt->n3= 100.
DEBUG (4): temppkt->n4= 100.
DEBUG (4): temppkt->n5= 100.
DEBUG (4): temppkt->n6= 100.
DEBUG (4): m5-4= 0.828489.
DEBUG (4): n5-4= 0.793591.
DEBUG (4): a5-4= 54289.
DEBUG (4): b5-4= 52002.
DEBUG (13): packet received from 14.
DEBUG (13): r1413= 0.
DEBUG (13): ws1= 4.
DEBUG (13): ws2= 4.
DEBUG (13): wa2= 0.409400.
DEBUG (13): wb2= 0.511300.
DEBUG (13): temppkt->n1= 7.
DEBUG (13): temppkt->n2= 5.
DEBUG (13): temppkt->n3= 100.
DEBUG (13): temppkt->n4= 100.
DEBUG (13): temppkt->n5= 100.
DEBUG (13): temppkt->n6= 100.
DEBUG (13): m14-13= 0.409491.
DEBUG (13): n14-13= 0.511391.
DEBUG (13): a14-13= 26830.
DEBUG (13): b14-13= 33508.
DEBUG (3): packet received from 7.
DEBUG (3): r73= 0.
DEBUG (3): ws1= 4.
DEBUG (3): ws2= 4.
DEBUG (3): wa2= 0.687800.
DEBUG (3): wb2= 0.724500.
DEBUG (3): temppkt->n1= 6.
DEBUG (3): temppkt->n2= 100.
DEBUG (3): temppkt->n3= 100.
DEBUG (3): temppkt->n4= 100.
DEBUG (3): temppkt->n5= 100.
DEBUG (3): temppkt->n6= 100.
DEBUG (3): m7-3= 0.687892.
DEBUG (3): n7-3= 0.724577.
DEBUG (3): a7-3= 45074.
DEBUG (3): b7-3= 47480.
DEBUG (23): packet received from 24.
DEBUG (23): r2423= 0.
DEBUG (23): ws1= 4.
DEBUG (23): ws2= 4.
DEBUG (23): wa2= 0.307900.
DEBUG (23): wb2= 0.648900.
DEBUG (23): temppkt->n1= 8.
DEBUG (23): temppkt->n2= 5.
DEBUG (23): temppkt->n3= 100.
DEBUG (23): temppkt->n4= 100.
DEBUG (23): temppkt->n5= 100.
DEBUG (23): temppkt->n6= 100.
DEBUG (23): m24-23= 0.307988.
DEBUG (23): n24-23= 0.648997.
DEBUG (23): a24-23= 20178.
DEBUG (23): b24-23= 42525.
DEBUG (12): packet received from 13.
DEBUG (12): r132512= 0.
DEBUG (12): r1312= 0.
DEBUG (12): r2512= 0.
DEBUG (12): s12[0]= 0.000000.
DEBUG (12): s12[1]= 1.000000.
DEBUG (12): s12[2]= 0.000000.
DEBUG (12): s12[3]= 0.511600.
DEBUG (12): ws1= 4.
DEBUG (12): ws2= 4.
DEBUG (12): wa2= 0.409300.
DEBUG (12): wb2= 0.511200.
DEBUG (12): temppkt->n1= 7.
DEBUG (12): temppkt->n2= 5.
DEBUG (12): temppkt->n3= 100.
DEBUG (12): temppkt->n4= 100.
DEBUG (12): temppkt->n5= 100.
DEBUG (12): temppkt->n6= 100.
DEBUG (12): m13-12= 0.409400.
DEBUG (12): n13-12= 0.511299.
DEBUG (12): a13-12= 26823.
DEBUG (12): b13-12= 33501.
DEBUG (26): packet received from 27.
DEBUG (26): r273726= 0.
DEBUG (26): r2726= 0.
DEBUG (26): r3726= 0.
DEBUG (26): s26[0]= 0.545500.
DEBUG (26): s26[1]= 1.000000.
DEBUG (26): s26[2]= 0.000000.
DEBUG (26): s26[3]= 0.513500.
DEBUG (26): ws1= 4.
DEBUG (26): ws2= 4.
DEBUG (26): wa2= 0.585500.
DEBUG (26): wb2= 0.976800.
DEBUG (26): temppkt->n1= 7.
DEBUG (26): temppkt->n2= 5.
DEBUG (26): temppkt->n3= 5.
DEBUG (26): temppkt->n4= 100.
DEBUG (26): temppkt->n5= 100.
DEBUG (26): temppkt->n6= 100.
DEBUG (26): m27-26= 0.585571.
DEBUG (26): n27-26= 0.976898.
DEBUG (26): a27-26= 38370.
DEBUG (26): b27-26= 64014.
DEBUG (14): packet received from 27.
DEBUG (14): r152714= 0.
DEBUG (14): r1514= 0.
DEBUG (14): r2714= 0.
DEBUG (14): s14[0]= 0.000000.
DEBUG (14): s14[1]= 1.000000.
DEBUG (14): s14[2]= 0.000000.
DEBUG (14): s14[3]= 0.545500.
DEBUG (14): ws1= 4.
DEBUG (14): ws2= 4.
DEBUG (14): wa2= 0.115800.
DEBUG (14): wb2= 0.585500.
DEBUG (14): temppkt->n1= 7.
DEBUG (14): temppkt->n2= 5.
DEBUG (14): temppkt->n3= 5.
DEBUG (14): temppkt->n4= 100.
DEBUG (14): temppkt->n5= 100.
DEBUG (14): temppkt->n6= 100.
DEBUG (14): m27-14= 0.115892.
DEBUG (14): n27-14= 0.585571.
DEBUG (14): a27-14= 7588.
DEBUG (14): b27-14= 38370.
DEBUG (11): packet received from 12.
DEBUG (11): r1211= 0.
DEBUG (11): ws1= 4.
DEBUG (11): ws2= 4.
DEBUG (11): wa2= 0.409200.
DEBUG (11): wb2= 0.511100.
DEBUG (11): temppkt->n1= 7.
DEBUG (11): temppkt->n2= 5.
DEBUG (11): temppkt->n3= 100.
DEBUG (11): temppkt->n4= 100.
DEBUG (11): temppkt->n5= 100.
DEBUG (11): temppkt->n6= 100.
DEBUG (11): m12-11= 0.409293.
DEBUG (11): n12-11= 0.511193.
DEBUG (11): a12-11= 26816.
DEBUG (11): b12-11= 33494.
DEBUG (25): packet received from 26.
DEBUG (25): r2625= 0.
DEBUG (25): ws1= 4.
DEBUG (25): ws2= 4.
DEBUG (25): wa2= 0.585400.
DEBUG (25): wb2= 0.976700.
DEBUG (25): temppkt->n1= 7.
DEBUG (25): temppkt->n2= 5.
DEBUG (25): temppkt->n3= 5.
DEBUG (25): temppkt->n4= 100.
DEBUG (25): temppkt->n5= 100.
DEBUG (25): temppkt->n6= 100.
DEBUG (25): m26-25= 0.585489.
DEBUG (25): n26-25= 0.976791.
DEBUG (25): a26-25= 38364.
DEBUG (25): b26-25= 64008.
DEBUG (22): packet received from 23.
DEBUG (22): r233322= 0.
DEBUG (22): r2322= 0.
DEBUG (22): r3322= 0.
DEBUG (22): s22[0]= 0.485700.
DEBUG (22): s22[1]= 1.000000.
DEBUG (22): s22[2]= 0.000000.
DEBUG (22): s22[3]= 0.561000.
DEBUG (22): ws1= 4.
DEBUG (22): ws2= 4.
DEBUG (22): wa2= 0.473500.
DEBUG (22): wb2= 0.648800.
DEBUG (22): temppkt->n1= 8.
DEBUG (22): temppkt->n2= 5.
DEBUG (22): temppkt->n3= 100.
DEBUG (22): temppkt->n4= 100.
DEBUG (22): temppkt->n5= 100.
DEBUG (22): temppkt->n6= 100.
DEBUG (22): m23-22= 0.473517.
DEBUG (22): n23-22= 0.648890.
DEBUG (22): a23-22= 31030.
DEBUG (22): b23-22= 42519.
DEBUG (10): packet received from 23.
DEBUG (10): r112310= 0.
DEBUG (10): r1110= 0.
DEBUG (10): r2310= 0.
DEBUG (10): s10[0]= 0.000000.
DEBUG (10): s10[1]= 1.000000.
DEBUG (10): s10[2]= 0.000000.
DEBUG (10): s10[3]= 0.485700.
DEBUG (10): ws1= 4.
DEBUG (10): ws2= 4.
DEBUG (10): wa2= 0.307800.
DEBUG (10): wb2= 0.473500.
DEBUG (10): temppkt->n1= 8.
DEBUG (10): temppkt->n2= 5.
DEBUG (10): temppkt->n3= 100.
DEBUG (10): temppkt->n4= 100.
DEBUG (10): temppkt->n5= 100.
DEBUG (10): temppkt->n6= 100.
DEBUG (10): m23-10= 0.307897.
DEBUG (10): n23-10= 0.473517.
DEBUG (10): a23-10= 20171.
DEBUG (10): b23-10= 31030.
DEBUG (10): packet received from 11.
DEBUG (10): r112310= 0.
DEBUG (10): r1110= 0.
DEBUG (10): r2310= 0.
DEBUG (10): s10[0]= 0.000000.
DEBUG (10): s10[1]= 1.000000.
DEBUG (10): s10[2]= 0.000000.
DEBUG (10): s10[3]= 0.485700.
DEBUG (10): ws1= 4.
DEBUG (10): ws2= 4.
DEBUG (10): wa2= 0.409100.
DEBUG (10): wb2= 0.511000.
DEBUG (10): temppkt->n1= 7.
DEBUG (10): temppkt->n2= 5.
DEBUG (10): temppkt->n3= 100.
DEBUG (10): temppkt->n4= 100.
DEBUG (10): temppkt->n5= 100.
DEBUG (10): temppkt->n6= 100.
DEBUG (10): m11-10= 0.409186.
DEBUG (10): n11-10= 0.511086.
DEBUG (10): a11-10= 26810.
DEBUG (10): b11-10= 33488.
DEBUG (13): packet received from 14.
DEBUG (13): r1413= 0.
DEBUG (13): ws1= 4.
DEBUG (13): ws2= 4.
DEBUG (13): wa2= 0.115700.
DEBUG (13): wb2= 0.585400.
DEBUG (13): temppkt->n1= 7.
DEBUG (13): temppkt->n2= 5.
DEBUG (13): temppkt->n3= 5.
DEBUG (13): temppkt->n4= 100.
DEBUG (13): temppkt->n5= 100.
DEBUG (13): temppkt->n6= 100.
DEBUG (13): m14-13= 0.115785.
DEBUG (13): n14-13= 0.585489.
DEBUG (13): a14-13= 7582.
DEBUG (13): b14-13= 38364.
DEBUG (7): packet received from 22.
DEBUG (7): r10227= 0.
DEBUG (7): r107= 0.
DEBUG (7): r227= 0.
DEBUG (7): s7[0]= 0.000000.
DEBUG (7): s7[1]= 1.000000.
DEBUG (7): s7[2]= 0.000000.
DEBUG (7): s7[3]= 1.000000.
DEBUG (7): ws1= 4.
DEBUG (7): ws2= 4.
DEBUG (7): wa2= 0.473400.
DEBUG (7): wb2= 0.648700.
DEBUG (7): temppkt->n1= 8.
DEBUG (7): temppkt->n2= 5.
DEBUG (7): temppkt->n3= 100.
DEBUG (7): temppkt->n4= 100.
DEBUG (7): temppkt->n5= 100.
DEBUG (7): temppkt->n6= 100.
DEBUG (7): m22-7= 0.473487.
DEBUG (7): n22-7= 0.648798.
DEBUG (7): a22-7= 31024.
DEBUG (7): b22-7= 42512.
DEBUG (12): packet received from 13.
DEBUG (12): r132512= 0.
DEBUG (12): r1312= 0.
DEBUG (12): r2512= 0.
DEBUG (12): s12[0]= 0.000000.
DEBUG (12): s12[1]= 1.000000.
DEBUG (12): s12[2]= 0.000000.
DEBUG (12): s12[3]= 0.511600.
DEBUG (12): ws1= 4.
DEBUG (12): ws2= 4.
DEBUG (12): wa2= 0.115600.
DEBUG (12): wb2= 0.585300.
DEBUG (12): temppkt->n1= 7.
DEBUG (12): temppkt->n2= 5.
DEBUG (12): temppkt->n3= 5.
DEBUG (12): temppkt->n4= 100.
DEBUG (12): temppkt->n5= 100.
DEBUG (12): temppkt->n6= 100.
DEBUG (12): m13-12= 0.115694.
DEBUG (12): n13-12= 0.585397.
DEBUG (12): a13-12= 7575.
DEBUG (12): b13-12= 38357.
DEBUG (7): packet received from 10.
DEBUG (7): r10227= 0.
DEBUG (7): r107= 0.
DEBUG (7): r227= 0.
DEBUG (7): s7[0]= 0.000000.
DEBUG (7): s7[1]= 1.000000.
DEBUG (7): s7[2]= 0.000000.
DEBUG (7): s7[3]= 1.000000.
DEBUG (7): ws1= 4.
DEBUG (7): ws2= 4.
DEBUG (7): wa2= 0.409000.
DEBUG (7): wb2= 0.510900.
DEBUG (7): temppkt->n1= 7.
DEBUG (7): temppkt->n2= 5.
DEBUG (7): temppkt->n3= 100.
DEBUG (7): temppkt->n4= 100.
DEBUG (7): temppkt->n5= 100.
DEBUG (7): temppkt->n6= 100.
DEBUG (7): m10-7= 0.409094.
DEBUG (7): n10-7= 0.510994.
DEBUG (7): a10-7= 26803.
DEBUG (7): b10-7= 33481.
DEBUG (12): packet received from 25.
DEBUG (12): r132512= 0.
DEBUG (12): r1312= 0.
DEBUG (12): r2512= 0.
DEBUG (12): s12[0]= 0.000000.
DEBUG (12): s12[1]= 1.000000.
DEBUG (12): s12[2]= 0.000000.
DEBUG (12): s12[3]= 0.511600.
DEBUG (12): ws1= 4.
DEBUG (12): ws2= 4.
DEBUG (12): wa2= 0.585300.
DEBUG (12): wb2= 0.785500.
DEBUG (12): temppkt->n1= 7.
DEBUG (12): temppkt->n2= 5.
DEBUG (12): temppkt->n3= 5.
DEBUG (12): temppkt->n4= 100.
DEBUG (12): temppkt->n5= 100.
DEBUG (12): temppkt->n6= 100.
DEBUG (12): m25-12= 0.585397.
DEBUG (12): n25-12= 0.785587.
DEBUG (12): a25-12= 38357.
DEBUG (12): b25-12= 51477.
DEBUG (3): packet received from 7.
DEBUG (3): r73= 0.
DEBUG (3): ws1= 4.
DEBUG (3): ws2= 4.
DEBUG (3): temppkt3= 4.
DEBUG (3): wa1= 890.
DEBUG (3): wb1= 6480.
DEBUG (3): wa2= 0.089000.
DEBUG (3): wb2= 0.648000.
DEBUG (3): temppkt->n1= 7.
DEBUG (3): temppkt->n2= 5.
DEBUG (3): temppkt->n3= 4.
DEBUG (3): temppkt->n4= 100.
DEBUG (3): temppkt->n5= 100.
DEBUG (3): temppkt->n6= 100.
DEBUG (3): m7-3= 0.408988.
DEBUG (3): n7-3= 0.464869.
DEBUG (3): a7-3= 5832.
DEBUG (3): b7-3= 42466.
DEBUG (4): packet received from 7.
DEBUG (4): r5784= 0.
DEBUG (4): r54= 0.
DEBUG (4): r74= 0.
DEBUG (4): r84= 0.
DEBUG (4): s4[0]= 0.000000.
DEBUG (4): s4[1]= 1.000000.
DEBUG (4): s4[2]= 0.548400.
DEBUG (4): s4[3]= 1.000000.
DEBUG (4): s4[4]= 0.000000.
DEBUG (4): s4[5]= 0.409100.
DEBUG (4): ws1= 4.
DEBUG (4): ws2= 4.
DEBUG (4): wa2= 0.464800.
DEBUG (4): wb2= 0.510800.
DEBUG (4): temppkt->n1= 7.
DEBUG (4): temppkt->n2= 5.
DEBUG (4): temppkt->n3= 100.
DEBUG (4): temppkt->n4= 100.
DEBUG (4): temppkt->n5= 100.
DEBUG (4): temppkt->n6= 100.
DEBUG (4): m7-4= 0.464869.
DEBUG (4): n7-4= 0.510887.
DEBUG (4): a7-4= 30460.
DEBUG (4): b7-4= 33475.
DEBUG (11): packet received from 12.
DEBUG (11): r1211= 0.
DEBUG (11): ws1= 4.
DEBUG (11): ws2= 4.
DEBUG (11): wa2= 0.585200.
DEBUG (11): wb2= 0.785400.
DEBUG (11): temppkt->n1= 7.
DEBUG (11): temppkt->n2= 5.
DEBUG (11): temppkt->n3= 5.
DEBUG (11): temppkt->n4= 100.
DEBUG (11): temppkt->n5= 100.
DEBUG (11): temppkt->n6= 100.
DEBUG (11): m12-11= 0.585290.
DEBUG (11): n12-11= 0.785489.
DEBUG (11): a12-11= 38351.
DEBUG (11): b12-11= 51471.
DEBUG (1): packet received from 3.
DEBUG (1): r341= 0.
DEBUG (1): r31= 0.
DEBUG (1): r41= 0.
DEBUG (1): s1[0]= 0.000000.
DEBUG (1): s1[1]= 1.000000.
DEBUG (1): s1[2]= 0.000000.
DEBUG (1): s1[3]= 1.000000.
DEBUG (1): ws1= 3.
DEBUG (1): ws2= 4.
DEBUG (1): wa2= 0.088900.
DEBUG (1): wb2= 0.647900.
DEBUG (1): temppkt->n1= 7.
DEBUG (1): temppkt->n2= 5.
DEBUG (1): temppkt->n3= 4.
DEBUG (1): temppkt->n4= 100.
DEBUG (1): temppkt->n5= 100.
DEBUG (1): temppkt->n6= 100.
DEBUG (1): m3-1= 0.088991.
DEBUG (1): n3-1= 0.647990.
DEBUG (1): a3-1= 5826.
DEBUG (1): b3-1= 42460.
DEBUG (50): packet received from 1.
DEBUG (50): sourceid= 32.
DEBUG (50): r1250= 0.
DEBUG (50): r150= 0.
DEBUG (50): r250= 0.
DEBUG (50): s50[0]= 0.000000.
DEBUG (50): s50[1]= 1.000000.
DEBUG (50): s50[2]= 0.000000.
DEBUG (50): s50[3]= 1.000000.
DEBUG (50): a1= 5826.
DEBUG (50): b1= 42460.
DEBUG (50): btrpkt->n1= 7.
DEBUG (50): btrpkt->n2= 5.
DEBUG (50): btrpkt->n3= 4.
DEBUG (50): btrpkt->n4= 100.
DEBUG (50): btrpkt->n5= 100.
DEBUG (50): btrpkt->n6= 100.
DEBUG (50): ws1= 3.
DEBUG (50): ws2= 4.
DEBUG (50): wa2= 0.088800.
DEBUG (50): wb2= 0.647800.
DEBUG (50): btrpkt->n1= 7.
DEBUG (50): btrpkt->n2= 5.
DEBUG (50): btrpkt->n3= 4.
DEBUG (50): btrpkt->n4= 100.
DEBUG (50): btrpkt->n5= 100.
DEBUG (50): btrpkt->n6= 100.
DEBUG (50): m= 0.088899.
DEBUG (50): n= 0.647898.
DEBUG (50): a2= 5819.
DEBUG (50): b2= 42453.
DEBUG (10): packet received from 11.
DEBUG (10): r112310= 0.
DEBUG (10): r1110= 0.
DEBUG (10): r2310= 0.
DEBUG (10): s10[0]= 0.000000.
DEBUG (10): s10[1]= 1.000000.
DEBUG (10): s10[2]= 0.000000.
DEBUG (10): s10[3]= 0.485700.
DEBUG (10): ws1= 4.
DEBUG (10): ws2= 4.
DEBUG (10): wa2= 0.585100.
DEBUG (10): wb2= 0.785300.
DEBUG (10): temppkt->n1= 7.
DEBUG (10): temppkt->n2= 5.
DEBUG (10): temppkt->n3= 5.
DEBUG (10): temppkt->n4= 100.
DEBUG (10): temppkt->n5= 100.
DEBUG (10): temppkt->n6= 100.
DEBUG (10): m11-10= 0.585199.
DEBUG (10): n11-10= 0.785397.
DEBUG (10): a11-10= 38344.
DEBUG (10): b11-10= 51464.
DEBUG (7): packet received from 10.
DEBUG (7): r10227= 0.
DEBUG (7): r107= 0.
DEBUG (7): r227= 0.
DEBUG (7): s7[0]= 0.000000.
DEBUG (7): s7[1]= 1.000000.
DEBUG (7): s7[2]= 0.000000.
DEBUG (7): s7[3]= 1.000000.
DEBUG (7): ws1= 4.
DEBUG (7): ws2= 4.
DEBUG (7): wa2= 0.585000.
DEBUG (7): wb2= 0.785200.
DEBUG (7): temppkt->n1= 7.
DEBUG (7): temppkt->n2= 5.
DEBUG (7): temppkt->n3= 5.
DEBUG (7): temppkt->n4= 100.
DEBUG (7): temppkt->n5= 100.
DEBUG (7): temppkt->n6= 100.
DEBUG (7): m10-7= 0.585092.
DEBUG (7): n10-7= 0.785290.
DEBUG (7): a10-7= 38337.
DEBUG (7): b10-7= 51458.
DEBUG (3): packet received from 7.
DEBUG (3): r73= 0.
DEBUG (3): ws1= 4.
DEBUG (3): ws2= 4.
DEBUG (3): wa2= 0.584900.
DEBUG (3): wb2= 0.694700.
DEBUG (3): temppkt->n1= 7.
DEBUG (3): temppkt->n2= 5.
DEBUG (3): temppkt->n3= 5.
DEBUG (3): temppkt->n4= 100.
DEBUG (3): temppkt->n5= 100.
DEBUG (3): temppkt->n6= 100.
DEBUG (3): m7-3= 0.584985.
DEBUG (3): n7-3= 0.694782.
DEBUG (3): a7-3= 38331.
DEBUG (3): b7-3= 45527.
DEBUG (4): packet received from 7.
DEBUG (4): r5784= 0.
DEBUG (4): r54= 0.
DEBUG (4): r74= 0.
DEBUG (4): r84= 0.
DEBUG (4): s4[0]= 0.000000.
DEBUG (4): s4[1]= 1.000000.
DEBUG (4): s4[2]= 0.548400.
DEBUG (4): s4[3]= 1.000000.
DEBUG (4): s4[4]= 0.000000.
DEBUG (4): s4[5]= 0.409100.
DEBUG (4): ws1= 4.
DEBUG (4): ws2= 4.
DEBUG (4): wa2= 0.694700.
DEBUG (4): wb2= 0.785100.
DEBUG (4): temppkt->n1= 7.
DEBUG (4): temppkt->n2= 5.
DEBUG (4): temppkt->n3= 5.
DEBUG (4): temppkt->n4= 100.
DEBUG (4): temppkt->n5= 100.
DEBUG (4): temppkt->n6= 100.
DEBUG (4): m7-4= 0.694782.
DEBUG (4): n7-4= 0.785199.
DEBUG (4): a7-4= 45527.
DEBUG (4): b7-4= 51451.
DEBUG (1): packet received from 3.
DEBUG (1): r341= 0.
DEBUG (1): r31= 0.
DEBUG (1): r41= 0.
DEBUG (1): s1[0]= 0.000000.
DEBUG (1): s1[1]= 1.000000.
DEBUG (1): s1[2]= 0.000000.
DEBUG (1): s1[3]= 1.000000.
DEBUG (1): ws1= 4.
DEBUG (1): ws2= 4.
DEBUG (1): wa2= 0.584800.
DEBUG (1): wb2= 0.694600.
DEBUG (1): temppkt->n1= 7.
DEBUG (1): temppkt->n2= 5.
DEBUG (1): temppkt->n3= 5.
DEBUG (1): temppkt->n4= 100.
DEBUG (1): temppkt->n5= 100.
DEBUG (1): temppkt->n6= 100.
DEBUG (1): m3-1= 0.584894.
DEBUG (1): n3-1= 0.694697.
DEBUG (1): a3-1= 38324.
DEBUG (1): b3-1= 45520.
DEBUG (50): packet received from 1.
DEBUG (50): sourceid= 32.
DEBUG (50): r1250= 0.
DEBUG (50): r150= 0.
DEBUG (50): r250= 0.
DEBUG (50): s50[0]= 0.000000.
DEBUG (50): s50[1]= 1.000000.
DEBUG (50): s50[2]= 0.000000.
DEBUG (50): s50[3]= 1.000000.
DEBUG (50): a1= 38324.
DEBUG (50): b1= 45520.
DEBUG (50): btrpkt->n1= 7.
DEBUG (50): btrpkt->n2= 5.
DEBUG (50): btrpkt->n3= 5.
DEBUG (50): btrpkt->n4= 100.
DEBUG (50): btrpkt->n5= 100.
DEBUG (50): btrpkt->n6= 100.
DEBUG (50): ws1= 4.
DEBUG (50): ws2= 4.
DEBUG (50): wa2= 0.584700.
DEBUG (50): wb2= 0.694500.
DEBUG (50): btrpkt->n1= 7.
DEBUG (50): btrpkt->n2= 5.
DEBUG (50): btrpkt->n3= 5.
DEBUG (50): btrpkt->n4= 100.
DEBUG (50): btrpkt->n5= 100.
DEBUG (50): btrpkt->n6= 100.
DEBUG (50): m= 0.584787.
DEBUG (50): n= 0.694591.
DEBUG (50): a2= 38318.
DEBUG (50): b2= 45514.
DEBUG (1): count is 3.
DEBUG (1): **************************.
DEBUG (2): count is 3.
DEBUG (2): **************************.
DEBUG (3): count is 3.
DEBUG (3): **************************.
DEBUG (4): count is 3.
DEBUG (4): **************************.
DEBUG (5): count is 3.
DEBUG (5): **************************.
DEBUG (6): count is 3.
DEBUG (6): **************************.
DEBUG (7): count is 3.
DEBUG (7): **************************.
DEBUG (8): count is 3.
DEBUG (8): **************************.
DEBUG (9): count is 3.
DEBUG (9): **************************.
DEBUG (10): count is 3.
DEBUG (10): **************************.
DEBUG (11): count is 3.
DEBUG (11): **************************.
DEBUG (12): count is 3.
DEBUG (12): **************************.
DEBUG (13): count is 3.
DEBUG (13): **************************.
DEBUG (14): count is 3.
DEBUG (14): **************************.
DEBUG (15): count is 3.
DEBUG (15): **************************.
DEBUG (16): count is 3.
DEBUG (16): **************************.
DEBUG (17): count is 3.
DEBUG (17): **************************.
DEBUG (18): count is 3.
DEBUG (18): **************************.
DEBUG (19): count is 3.
DEBUG (19): **************************.
DEBUG (20): count is 3.
DEBUG (20): **************************.
DEBUG (21): count is 3.
DEBUG (21): **************************.
DEBUG (22): count is 3.
DEBUG (22): **************************.
DEBUG (23): count is 3.
DEBUG (23): **************************.
DEBUG (24): count is 3.
DEBUG (24): **************************.
DEBUG (25): count is 3.
DEBUG (25): **************************.
DEBUG (26): count is 3.
DEBUG (26): **************************.
DEBUG (27): count is 3.
DEBUG (27): **************************.
DEBUG (28): count is 3.
DEBUG (28): **************************.
DEBUG (29): count is 3.
DEBUG (29): **************************.
DEBUG (30): count is 3.
DEBUG (30): **************************.
DEBUG (31): count is 3.
DEBUG (31): **************************.
DEBUG (32): count is 3.
DEBUG (32): **************************.
DEBUG (33): count is 3.
DEBUG (33): **************************.
DEBUG (34): count is 3.
DEBUG (34): **************************.
DEBUG (35): count is 3.
DEBUG (35): **************************.
DEBUG (36): count is 3.
DEBUG (36): **************************.
DEBUG (37): count is 3.
DEBUG (37): **************************.
DEBUG (38): count is 3.
DEBUG (38): **************************.
DEBUG (39): count is 3.
DEBUG (39): **************************.
DEBUG (40): count is 3.
DEBUG (40): **************************.
DEBUG (41): count is 3.
DEBUG (41): **************************.
DEBUG (42): count is 3.
DEBUG (42): **************************.
DEBUG (43): count is 3.
DEBUG (43): **************************.
DEBUG (44): count is 3.
DEBUG (44): **************************.
DEBUG (45): count is 3.
DEBUG (45): **************************.
DEBUG (46): count is 3.
DEBUG (46): **************************.
DEBUG (47): count is 3.
DEBUG (47): **************************.
DEBUG (48): count is 3.
DEBUG (48): **************************.
DEBUG (49): count is 3.
DEBUG (49): **************************.
DEBUG (50): count is 3.
DEBUG (50): **************************.
DEBUG (40): packet received from 41.
DEBUG (40): r4140= 0.
DEBUG (40): ws1= 4.
DEBUG (40): ws2= 4.
DEBUG (40): temppkt1= 8.
DEBUG (40): wa1= 9500.
DEBUG (40): wb1= 9720.
DEBUG (40): temppkt2= 9.
DEBUG (40): wa1= 5000.
DEBUG (40): wb1= 7200.
DEBUG (40): wa2= 0.500000.
DEBUG (40): wb2= 0.720000.
DEBUG (40): temppkt->n1= 8.
DEBUG (40): temppkt->n2= 9.
DEBUG (40): temppkt->n3= 100.
DEBUG (40): temppkt->n4= 100.
DEBUG (40): temppkt->n5= 100.
DEBUG (40): temppkt->n6= 100.
DEBUG (40): m41-40= 0.895083.
DEBUG (40): n41-40= 0.897292.
DEBUG (40): a41-40= 32767.
DEBUG (40): b41-40= 47185.
DEBUG (30): packet received from 41.
DEBUG (30): r314130= 0.
DEBUG (30): r3130= 0.
DEBUG (30): r4130= 0.
DEBUG (30): s30[0]= 0.000000.
DEBUG (30): s30[1]= 0.400000.
DEBUG (30): s30[2]= 0.000000.
DEBUG (30): s30[3]= 0.473700.
DEBUG (30): ws1= 4.
DEBUG (30): ws2= 4.
DEBUG (30): temppkt1= 8.
DEBUG (30): wa1= 9300.
DEBUG (30): wb1= 9500.
DEBUG (30): temppkt2= 9.
DEBUG (30): wa1= 3000.
DEBUG (30): wb1= 5000.
DEBUG (30): wa2= 0.300000.
DEBUG (30): wb2= 0.500000.
DEBUG (30): temppkt->n1= 8.
DEBUG (30): temppkt->n2= 9.
DEBUG (30): temppkt->n3= 100.
DEBUG (30): temppkt->n4= 100.
DEBUG (30): temppkt->n5= 100.
DEBUG (30): temppkt->n6= 100.
DEBUG (30): m41-30= 0.893095.
DEBUG (30): n41-30= 0.895083.
DEBUG (30): a41-30= 19660.
DEBUG (30): b41-30= 32767.
DEBUG (1): packet received from 3.
DEBUG (1): r341= 0.
DEBUG (1): r31= 0.
DEBUG (1): r41= 0.
DEBUG (1): s1[0]= 0.000000.
DEBUG (1): s1[1]= 1.000000.
DEBUG (1): s1[2]= 0.000000.
DEBUG (1): s1[3]= 1.000000.
DEBUG (1): ws1= 4.
DEBUG (1): ws2= 4.
DEBUG (1): temppkt1= 1.
DEBUG (1): wa1= 3910.
DEBUG (1): wb1= 9550.
DEBUG (1): wa2= 0.391000.
DEBUG (1): wb2= 0.955000.
DEBUG (1): a1= 0.
DEBUG (1): temppkt->n1= 1.
DEBUG (1): temppkt->n2= 100.
DEBUG (1): temppkt->n3= 100.
DEBUG (1): temppkt->n4= 100.
DEBUG (1): temppkt->n5= 100.
DEBUG (1): temppkt->n6= 100.
DEBUG (1): m3-1= 0.139193.
DEBUG (1): n3-1= 0.195590.
DEBUG (1): a3-1= 25624.
DEBUG (1): b3-1= 62585.
DEBUG (7): packet received from 10.
DEBUG (7): r10227= 0.
DEBUG (7): r107= 0.
DEBUG (7): r227= 0.
DEBUG (7): s7[0]= 0.000000.
DEBUG (7): s7[1]= 1.000000.
DEBUG (7): s7[2]= 0.000000.
DEBUG (7): s7[3]= 1.000000.
DEBUG (7): ws1= 4.
DEBUG (7): ws2= 4.
DEBUG (7): wa2= 0.596500.
DEBUG (7): wb2= 0.689700.
DEBUG (7): temppkt->n1= 100.
DEBUG (7): temppkt->n2= 100.
DEBUG (7): temppkt->n3= 100.
DEBUG (7): temppkt->n4= 100.
DEBUG (7): temppkt->n5= 100.
DEBUG (7): temppkt->n6= 100.
DEBUG (7): m10-7= 0.596597.
DEBUG (7): n10-7= 0.689799.
DEBUG (7): a10-7= 39091.
DEBUG (7): b10-7= 45199.
DEBUG (36): packet received from 37.
DEBUG (36): r374836= 0.
DEBUG (36): r3736= 0.
DEBUG (36): r4836= 0.
DEBUG (36): s36[0]= 0.513500.
DEBUG (36): s36[1]= 1.000000.
DEBUG (36): s36[2]= 0.000000.
DEBUG (36): s36[3]= 0.416700.
DEBUG (36): ws1= 4.
DEBUG (36): ws2= 4.
DEBUG (36): temppkt1= 8.
DEBUG (36): wa1= 5310.
DEBUG (36): wb1= 6070.
DEBUG (36): wa2= 0.531000.
DEBUG (36): wb2= 0.607000.
DEBUG (36): a1= 0.
DEBUG (36): temppkt->n1= 8.
DEBUG (36): temppkt->n2= 100.
DEBUG (36): temppkt->n3= 100.
DEBUG (36): temppkt->n4= 100.
DEBUG (36): temppkt->n5= 100.
DEBUG (36): temppkt->n6= 100.
DEBUG (36): m37-36= 0.853153.
DEBUG (36): n37-36= 0.860792.
DEBUG (36): a37-36= 34799.
DEBUG (36): b37-36= 39779.
DEBUG (24): packet received from 25.
DEBUG (24): r253524= 0.
DEBUG (24): r2524= 0.
DEBUG (24): r3524= 0.
DEBUG (24): s24[0]= 0.511600.
DEBUG (24): s24[1]= 1.000000.
DEBUG (24): s24[2]= 0.000000.
DEBUG (24): s24[3]= 0.448300.
DEBUG (24): ws1= 4.
DEBUG (24): ws2= 4.
DEBUG (24): temppkt1= 6.
DEBUG (24): wa1= 4310.
DEBUG (24): wb1= 5440.
DEBUG (24): wa2= 0.431000.
DEBUG (24): wb2= 0.544000.
DEBUG (24): a1= 0.
DEBUG (24): temppkt->n1= 6.
DEBUG (24): temppkt->n2= 100.
DEBUG (24): temppkt->n3= 100.
DEBUG (24): temppkt->n4= 100.
DEBUG (24): temppkt->n5= 100.
DEBUG (24): temppkt->n6= 100.
DEBUG (24): m25-24= 0.643162.
DEBUG (24): n25-24= 0.654490.
DEBUG (24): a25-24= 28245.
DEBUG (24): b25-24= 35651.
DEBUG (19): packet received from 20.
DEBUG (19): r203219= 0.
DEBUG (19): r2019= 0.
DEBUG (19): r3219= 0.
DEBUG (19): s19[0]= 0.000000.
DEBUG (19): s19[1]= 1.000000.
DEBUG (19): s19[2]= 0.000000.
DEBUG (19): s19[3]= 0.428600.
DEBUG (19): ws1= 4.
DEBUG (19): ws2= 5.
DEBUG (19): wa2= 0.983100.
DEBUG (19): wb2= 1.000000.
DEBUG (19): temppkt->n1= 100.
DEBUG (19): temppkt->n2= 100.
DEBUG (19): temppkt->n3= 100.
DEBUG (19): temppkt->n4= 100.
DEBUG (19): temppkt->n5= 100.
DEBUG (19): temppkt->n6= 100.
DEBUG (19): m20-19= 0.983200.
DEBUG (19): n20-19= 1.000000.
DEBUG (19): a20-19= 64427.
DEBUG (19): b20-19= 65535.
DEBUG (50): packet received from 2.
DEBUG (50): sourceid= 2.
DEBUG (50): r1250= 0.
DEBUG (50): r150= 0.
DEBUG (50): r250= 0.
DEBUG (50): s50[0]= 0.000000.
DEBUG (50): s50[1]= 1.000000.
DEBUG (50): s50[2]= 0.000000.
DEBUG (50): s50[3]= 1.000000.
DEBUG (50): a1= 6409.
DEBUG (50): b1= 9122.
DEBUG (50): btrpkt->n1= 100.
DEBUG (50): btrpkt->n2= 100.
DEBUG (50): btrpkt->n3= 100.
DEBUG (50): btrpkt->n4= 100.
DEBUG (50): btrpkt->n5= 100.
DEBUG (50): btrpkt->n6= 100.
DEBUG (50): ws1= 3.
DEBUG (50): ws2= 4.
DEBUG (50): wa2= 0.097700.
DEBUG (50): wb2= 0.139100.
DEBUG (50): btrpkt->n1= 100.
DEBUG (50): btrpkt->n2= 100.
DEBUG (50): btrpkt->n3= 100.
DEBUG (50): btrpkt->n4= 100.
DEBUG (50): btrpkt->n5= 100.
DEBUG (50): btrpkt->n6= 100.
DEBUG (50): m= 0.097795.
DEBUG (50): n= 0.139193.
DEBUG (50): a2= 6402.
DEBUG (50): b2= 9115.
DEBUG (36): packet received from 48.
DEBUG (36): r374836= 0.
DEBUG (36): r3736= 0.
DEBUG (36): r4836= 0.
DEBUG (36): s36[0]= 0.513500.
DEBUG (36): s36[1]= 1.000000.
DEBUG (36): s36[2]= 0.000000.
DEBUG (36): s36[3]= 0.416700.
DEBUG (36): ws1= 4.
DEBUG (36): ws2= 4.
DEBUG (36): temppkt1= 9.
DEBUG (36): wa1= 8500.
DEBUG (36): wb1= 8780.
DEBUG (36): temppkt2= 8.
DEBUG (36): wa1= 5000.
DEBUG (36): wb1= 7800.
DEBUG (36): wa2= 0.500000.
DEBUG (36): wb2= 0.780000.
DEBUG (36): temppkt->n1= 9.
DEBUG (36): temppkt->n2= 8.
DEBUG (36): temppkt->n3= 100.
DEBUG (36): temppkt->n4= 100.
DEBUG (36): temppkt->n5= 100.
DEBUG (36): temppkt->n6= 100.
DEBUG (36): m48-36= 0.985092.
DEBUG (36): n48-36= 0.987845.
DEBUG (36): a48-36= 32767.
DEBUG (36): b48-36= 51117.
DEBUG (47): packet received from 48.
DEBUG (47): r4847= 0.
DEBUG (47): ws1= 4.
DEBUG (47): ws2= 4.
DEBUG (47): temppkt1= 9.
DEBUG (47): wa1= 8780.
DEBUG (47): wb1= 9160.
DEBUG (47): wa2= 0.878000.
DEBUG (47): wb2= 0.916000.
DEBUG (47): a1= 0.
DEBUG (47): temppkt->n1= 9.
DEBUG (47): temppkt->n2= 100.
DEBUG (47): temppkt->n3= 100.
DEBUG (47): temppkt->n4= 100.
DEBUG (47): temppkt->n5= 100.
DEBUG (47): temppkt->n6= 100.
DEBUG (47): m48-47= 0.987845.
DEBUG (47): n48-47= 0.991699.
DEBUG (47): a48-47= 57539.
DEBUG (47): b48-47= 60030.
DEBUG (37): packet received from 38.
DEBUG (37): r3837= 0.
DEBUG (37): ws1= 4.
DEBUG (37): ws2= 4.
DEBUG (37): temppkt1= 8.
DEBUG (37): wa1= 6070.
DEBUG (37): wb1= 7310.
DEBUG (37): wa2= 0.607000.
DEBUG (37): wb2= 0.731000.
DEBUG (37): a1= 0.
DEBUG (37): temppkt->n1= 8.
DEBUG (37): temppkt->n2= 100.
DEBUG (37): temppkt->n3= 100.
DEBUG (37): temppkt->n4= 100.
DEBUG (37): temppkt->n5= 100.
DEBUG (37): temppkt->n6= 100.
DEBUG (37): m38-37= 0.860792.
DEBUG (37): n38-37= 0.873198.
DEBUG (37): a38-37= 39779.
DEBUG (37): b38-37= 47906.
DEBUG (4): packet received from 5.
DEBUG (4): r5784= 0.
DEBUG (4): r54= 0.
DEBUG (4): r74= 0.
DEBUG (4): r84= 0.
DEBUG (4): s4[0]= 0.000000.
DEBUG (4): s4[1]= 1.000000.
DEBUG (4): s4[2]= 0.548400.
DEBUG (4): s4[3]= 1.000000.
DEBUG (4): s4[4]= 0.000000.
DEBUG (4): s4[5]= 0.409100.
DEBUG (4): ws1= 4.
DEBUG (4): ws2= 4.
DEBUG (4): temppkt1= 3.
DEBUG (4): wa1= 1470.
DEBUG (4): wb1= 8430.
DEBUG (4): wa2= 0.147000.
DEBUG (4): wb2= 0.843000.
DEBUG (4): a1= 0.
DEBUG (4): temppkt->n1= 3.
DEBUG (4): temppkt->n2= 100.
DEBUG (4): temppkt->n3= 100.
DEBUG (4): temppkt->n4= 100.
DEBUG (4): temppkt->n5= 100.
DEBUG (4): temppkt->n6= 100.
DEBUG (4): m5-4= 0.314794.
DEBUG (4): n5-4= 0.384390.
DEBUG (4): a5-4= 9633.
DEBUG (4): b5-4= 55246.
DEBUG (28): packet received from 39.
DEBUG (28): r293928= 0.
DEBUG (28): r2928= 0.
DEBUG (28): r3928= 0.
DEBUG (28): s28[0]= 0.541700.
DEBUG (28): s28[1]= 1.000000.
DEBUG (28): s28[2]= 0.000000.
DEBUG (28): s28[3]= 0.464300.
DEBUG (28): ws1= 4.
DEBUG (28): ws2= 4.
DEBUG (28): temppkt1= 8.
DEBUG (28): wa1= 7310.
DEBUG (28): wb1= 7850.
DEBUG (28): temppkt2= 7.
DEBUG (28): wa1= 3100.
DEBUG (28): wb1= 8500.
DEBUG (28): wa2= 0.310000.
DEBUG (28): wb2= 0.850000.
DEBUG (28): temppkt->n1= 8.
DEBUG (28): temppkt->n2= 7.
DEBUG (28): temppkt->n3= 100.
DEBUG (28): temppkt->n4= 100.
DEBUG (28): temppkt->n5= 100.
DEBUG (28): temppkt->n6= 100.
DEBUG (28): m39-28= 0.873198.
DEBUG (28): n39-28= 0.878582.
DEBUG (28): a39-28= 20315.
DEBUG (28): b39-28= 55704.
DEBUG (19): packet received from 32.
DEBUG (19): r203219= 0.
DEBUG (19): r2019= 0.
DEBUG (19): r3219= 0.
DEBUG (19): s19[0]= 0.000000.
DEBUG (19): s19[1]= 1.000000.
DEBUG (19): s19[2]= 0.000000.
DEBUG (19): s19[3]= 0.428600.
DEBUG (19): ws1= 4.
DEBUG (19): ws2= 4.
DEBUG (19): temppkt1= 7.
DEBUG (19): wa1= 5050.
DEBUG (19): wb1= 5410.
DEBUG (19): temppkt2= 5.
DEBUG (19): wa1= 500.
DEBUG (19): wb1= 4100.
DEBUG (19): wa2= 0.050000.
DEBUG (19): wb2= 0.410000.
DEBUG (19): temppkt->n1= 7.
DEBUG (19): temppkt->n2= 5.
DEBUG (19): temppkt->n3= 100.
DEBUG (19): temppkt->n4= 100.
DEBUG (19): temppkt->n5= 100.
DEBUG (19): temppkt->n6= 100.
DEBUG (19): m32-19= 0.750591.
DEBUG (19): n32-19= 0.754149.
DEBUG (19): a32-19= 3276.
DEBUG (19): b32-19= 26869.
DEBUG (31): packet received from 32.
DEBUG (31): r3231= 0.
DEBUG (31): ws1= 4.
DEBUG (31): ws2= 4.
DEBUG (31): temppkt1= 7.
DEBUG (31): wa1= 5410.
DEBUG (31): wb1= 5880.
DEBUG (31): temppkt2= 5.
DEBUG (31): wa1= 4100.
DEBUG (31): wb1= 8800.
DEBUG (31): wa2= 0.410000.
DEBUG (31): wb2= 0.880000.
DEBUG (31): temppkt->n1= 7.
DEBUG (31): temppkt->n2= 5.
DEBUG (31): temppkt->n3= 100.
DEBUG (31): temppkt->n4= 100.
DEBUG (31): temppkt->n5= 100.
DEBUG (31): temppkt->n6= 100.
DEBUG (31): m32-31= 0.754149.
DEBUG (31): n32-31= 0.758892.
DEBUG (31): a32-31= 26869.
DEBUG (31): b32-31= 57670.
DEBUG (41): packet received from 42.
DEBUG (41): r4241= 0.
DEBUG (41): ws1= 4.
DEBUG (41): ws2= 4.
DEBUG (41): wa2= 0.897200.
DEBUG (41): wb2= 0.905500.
DEBUG (41): temppkt->n1= 100.
DEBUG (41): temppkt->n2= 100.
DEBUG (41): temppkt->n3= 100.
DEBUG (41): temppkt->n4= 100.
DEBUG (41): temppkt->n5= 100.
DEBUG (41): temppkt->n6= 100.
DEBUG (41): m42-41= 0.897292.
DEBUG (41): n42-41= 0.905592.
DEBUG (41): a42-41= 58798.
DEBUG (41): b42-41= 59341.
DEBUG (22): packet received from 23.
DEBUG (22): r233322= 0.
DEBUG (22): r2322= 0.
DEBUG (22): r3322= 0.
DEBUG (22): s22[0]= 0.485700.
DEBUG (22): s22[1]= 1.000000.
DEBUG (22): s22[2]= 0.000000.
DEBUG (22): s22[3]= 0.561000.
DEBUG (22): ws1= 4.
DEBUG (22): ws2= 4.
DEBUG (22): wa2= 0.592900.
DEBUG (22): wb2= 0.603000.
DEBUG (22): temppkt->n1= 100.
DEBUG (22): temppkt->n2= 100.
DEBUG (22): temppkt->n3= 100.
DEBUG (22): temppkt->n4= 100.
DEBUG (22): temppkt->n5= 100.
DEBUG (22): temppkt->n6= 100.
DEBUG (22): m23-22= 0.592911.
DEBUG (22): n23-22= 0.603098.
DEBUG (22): a23-22= 38855.
DEBUG (22): b23-22= 39517.
DEBUG (16): packet received from 17.
DEBUG (16): r172916= 0.
DEBUG (16): r1716= 0.
DEBUG (16): r2916= 0.
DEBUG (16): s16[0]= 0.000000.
DEBUG (16): s16[1]= 1.000000.
DEBUG (16): s16[2]= 0.000000.
DEBUG (16): s16[3]= 0.541700.
DEBUG (16): ws1= 4.
DEBUG (16): ws2= 4.
DEBUG (16): temppkt1= 9.
DEBUG (16): wa1= 5930.
DEBUG (16): wb1= 6410.
DEBUG (16): wa2= 0.593000.
DEBUG (16): wb2= 0.641000.
DEBUG (16): a1= 0.
DEBUG (16): temppkt->n1= 9.
DEBUG (16): temppkt->n2= 100.
DEBUG (16): temppkt->n3= 100.
DEBUG (16): temppkt->n4= 100.
DEBUG (16): temppkt->n5= 100.
DEBUG (16): temppkt->n6= 100.
DEBUG (16): m17-16= 0.959396.
DEBUG (16): n17-16= 0.964187.
DEBUG (16): a17-16= 38862.
DEBUG (16): b17-16= 42007.
DEBUG (5): packet received from 9.
DEBUG (5): r895= 0.
DEBUG (5): r85= 0.
DEBUG (5): r95= 0.
DEBUG (5): s5[0]= 0.409100.
DEBUG (5): s5[1]= 1.000000.
DEBUG (5): s5[2]= 0.000000.
DEBUG (5): s5[3]= 0.231900.
DEBUG (5): ws1= 4.
DEBUG (5): ws2= 4.
DEBUG (5): temppkt1= 5.
DEBUG (5): wa1= 5670.
DEBUG (5): wb1= 6600.
DEBUG (5): wa2= 0.567000.
DEBUG (5): wb2= 0.660000.
DEBUG (5): a1= 0.
DEBUG (5): temppkt->n1= 5.
DEBUG (5): temppkt->n2= 100.
DEBUG (5): temppkt->n3= 100.
DEBUG (5): temppkt->n4= 100.
DEBUG (5): temppkt->n5= 100.
DEBUG (5): temppkt->n6= 100.
DEBUG (5): m9-5= 0.556786.
DEBUG (5): n9-5= 0.566019.
DEBUG (5): a9-5= 37158.
DEBUG (5): b9-5= 43253.
DEBUG (21): packet received from 9.
DEBUG (21): r921= 0.
DEBUG (21): ws1= 4.
DEBUG (21): ws2= 4.
DEBUG (21): temppkt1= 5.
DEBUG (21): wa1= 7980.
DEBUG (21): wb1= 9650.
DEBUG (21): wa2= 0.798000.
DEBUG (21): wb2= 0.965000.
DEBUG (21): a1= 0.
DEBUG (21): temppkt->n1= 5.
DEBUG (21): temppkt->n2= 100.
DEBUG (21): temppkt->n3= 100.
DEBUG (21): temppkt->n4= 100.
DEBUG (21): temppkt->n5= 100.
DEBUG (21): temppkt->n6= 100.
DEBUG (21): m9-21= 0.579865.
DEBUG (21): n9-21= 0.596597.
DEBUG (21): a9-21= 52296.
DEBUG (21): b9-21= 63241.
DEBUG (45): packet received from 46.
DEBUG (45): r4645= 0.
DEBUG (45): ws1= 4.
DEBUG (45): ws2= 4.
DEBUG (45): temppkt1= 9.
DEBUG (45): wa1= 6680.
DEBUG (45): wb1= 7340.
DEBUG (45): wa2= 0.668000.
DEBUG (45): wb2= 0.734000.
DEBUG (45): a1= 0.
DEBUG (45): temppkt->n1= 9.
DEBUG (45): temppkt->n2= 100.
DEBUG (45): temppkt->n3= 100.
DEBUG (45): temppkt->n4= 100.
DEBUG (45): temppkt->n5= 100.
DEBUG (45): temppkt->n6= 100.
DEBUG (45): m46-45= 0.966879.
DEBUG (45): n46-45= 0.973495.
DEBUG (45): a46-45= 43777.
DEBUG (45): b46-45= 48102.
DEBUG (33): packet received from 34.
DEBUG (33): r3433= 0.
DEBUG (33): ws1= 4.
DEBUG (33): ws2= 4.
DEBUG (33): wa2= 0.779500.
DEBUG (33): wb2= 0.804400.
DEBUG (33): temppkt->n1= 100.
DEBUG (33): temppkt->n2= 100.
DEBUG (33): temppkt->n3= 100.
DEBUG (33): temppkt->n4= 100.
DEBUG (33): temppkt->n5= 100.
DEBUG (33): temppkt->n6= 100.
DEBUG (33): m34-33= 0.779599.
DEBUG (33): n34-33= 0.804486.
DEBUG (33): a34-33= 51084.
DEBUG (33): b34-33= 52716.
DEBUG (24): packet received from 35.
DEBUG (24): r253524= 0.
DEBUG (24): r2524= 0.
DEBUG (24): r3524= 0.
DEBUG (24): s24[0]= 0.511600.
DEBUG (24): s24[1]= 1.000000.
DEBUG (24): s24[2]= 0.000000.
DEBUG (24): s24[3]= 0.448300.
DEBUG (24): ws1= 4.
DEBUG (24): ws2= 4.
DEBUG (24): temppkt1= 8.
DEBUG (24): wa1= 440.
DEBUG (24): wb1= 1220.
DEBUG (24): wa2= 0.044000.
DEBUG (24): wb2= 0.122000.
DEBUG (24): a1= 0.
DEBUG (24): temppkt->n1= 8.
DEBUG (24): temppkt->n2= 100.
DEBUG (24): temppkt->n3= 100.
DEBUG (24): temppkt->n4= 100.
DEBUG (24): temppkt->n5= 100.
DEBUG (24): temppkt->n6= 100.
DEBUG (24): m35-24= 0.804486.
DEBUG (24): n35-24= 0.812291.
DEBUG (24): a35-24= 2883.
DEBUG (24): b35-24= 7995.
DEBUG (15): packet received from 16.
DEBUG (15): r1615= 0.
DEBUG (15): ws1= 4.
DEBUG (15): ws2= 4.
DEBUG (15): wa2= 0.592900.
DEBUG (15): wb2= 0.640900.
DEBUG (15): temppkt->n1= 9.
DEBUG (15): temppkt->n2= 100.
DEBUG (15): temppkt->n3= 100.
DEBUG (15): temppkt->n4= 100.
DEBUG (15): temppkt->n5= 100.
DEBUG (15): temppkt->n6= 100.
DEBUG (15): m16-15= 0.592996.
DEBUG (15): n16-15= 0.640986.
DEBUG (15): a16-15= 38855.
DEBUG (15): b16-15= 42001.
DEBUG (29): packet received from 30.
DEBUG (29): r3029= 0.
DEBUG (29): ws1= 4.
DEBUG (29): ws2= 4.
DEBUG (29): wa2= 0.299900.
DEBUG (29): wb2= 0.499900.
DEBUG (29): temppkt->n1= 8.
DEBUG (29): temppkt->n2= 9.
DEBUG (29): temppkt->n3= 100.
DEBUG (29): temppkt->n4= 100.
DEBUG (29): temppkt->n5= 100.
DEBUG (29): temppkt->n6= 100.
DEBUG (29): m30-29= 0.299992.
DEBUG (29): n30-29= 0.499992.
DEBUG (29): a30-29= 19653.
DEBUG (29): b30-29= 32760.
DEBUG (44): packet received from 45.
DEBUG (44): r4544= 0.
DEBUG (44): ws1= 4.
DEBUG (44): ws2= 4.
DEBUG (44): wa2= 0.667900.
DEBUG (44): wb2= 0.733900.
DEBUG (44): temppkt->n1= 9.
DEBUG (44): temppkt->n2= 100.
DEBUG (44): temppkt->n3= 100.
DEBUG (44): temppkt->n4= 100.
DEBUG (44): temppkt->n5= 100.
DEBUG (44): temppkt->n6= 100.
DEBUG (44): m45-44= 0.667994.
DEBUG (44): n45-44= 0.733989.
DEBUG (44): a45-44= 43770.
DEBUG (44): b45-44= 48096.
DEBUG (7): packet received from 22.
DEBUG (7): r10227= 0.
DEBUG (7): r107= 0.
DEBUG (7): r227= 0.
DEBUG (7): s7[0]= 0.000000.
DEBUG (7): s7[1]= 1.000000.
DEBUG (7): s7[2]= 0.000000.
DEBUG (7): s7[3]= 1.000000.
DEBUG (7): ws1= 4.
DEBUG (7): ws2= 4.
DEBUG (7): wa2= 0.592800.
DEBUG (7): wb2= 0.602900.
DEBUG (7): temppkt->n1= 100.
DEBUG (7): temppkt->n2= 100.
DEBUG (7): temppkt->n3= 100.
DEBUG (7): temppkt->n4= 100.
DEBUG (7): temppkt->n5= 100.
DEBUG (7): temppkt->n6= 100.
DEBUG (7): m22-7= 0.592889.
DEBUG (7): n22-7= 0.602991.
DEBUG (7): a22-7= 38849.
DEBUG (7): b22-7= 39511.
DEBUG (46): packet received from 47.
DEBUG (46): r4746= 0.
DEBUG (46): ws1= 4.
DEBUG (46): ws2= 4.
DEBUG (46): wa2= 0.877900.
DEBUG (46): wb2= 0.915900.
DEBUG (46): temppkt->n1= 9.
DEBUG (46): temppkt->n2= 100.
DEBUG (46): temppkt->n3= 100.
DEBUG (46): temppkt->n4= 100.
DEBUG (46): temppkt->n5= 100.
DEBUG (46): temppkt->n6= 100.
DEBUG (46): m47-46= 0.877989.
DEBUG (46): n47-46= 0.915999.
DEBUG (46): a47-46= 57533.
DEBUG (46): b47-46= 60023.
DEBUG (11): packet received from 12.
DEBUG (11): r1211= 0.
DEBUG (11): ws1= 4.
DEBUG (11): ws2= 4.
DEBUG (11): temppkt1= 7.
DEBUG (11): wa1= 3230.
DEBUG (11): wb1= 9530.
DEBUG (11): wa2= 0.323000.
DEBUG (11): wb2= 0.953000.
DEBUG (11): a1= 0.
DEBUG (11): temppkt->n1= 7.
DEBUG (11): temppkt->n2= 100.
DEBUG (11): temppkt->n3= 100.
DEBUG (11): temppkt->n4= 100.
DEBUG (11): temppkt->n5= 100.
DEBUG (11): temppkt->n6= 100.
DEBUG (11): m12-11= 0.732387.
DEBUG (11): n12-11= 0.795392.
DEBUG (11): a12-11= 21167.
DEBUG (11): b12-11= 62454.
DEBUG (17): packet received from 18.
DEBUG (17): r1817= 0.
DEBUG (17): ws1= 4.
DEBUG (17): ws2= 4.
DEBUG (17): temppkt1= 9.
DEBUG (17): wa1= 6410.
DEBUG (17): wb1= 7210.
DEBUG (17): wa2= 0.641000.
DEBUG (17): wb2= 0.721000.
DEBUG (17): a1= 0.
DEBUG (17): temppkt->n1= 9.
DEBUG (17): temppkt->n2= 100.
DEBUG (17): temppkt->n3= 100.
DEBUG (17): temppkt->n4= 100.
DEBUG (17): temppkt->n5= 100.
DEBUG (17): temppkt->n6= 100.
DEBUG (17): m18-17= 0.964187.
DEBUG (17): n18-17= 0.972198.
DEBUG (17): a18-17= 42007.
DEBUG (17): b18-17= 47250.
DEBUG (14): packet received from 27.
DEBUG (14): r152714= 0.
DEBUG (14): r1514= 0.
DEBUG (14): r2714= 0.
DEBUG (14): s14[0]= 0.000000.
DEBUG (14): s14[1]= 1.000000.
DEBUG (14): s14[2]= 0.000000.
DEBUG (14): s14[3]= 0.545500.
DEBUG (14): ws1= 4.
DEBUG (14): ws2= 4.
DEBUG (14): temppkt1= 6.
DEBUG (14): wa1= 8260.
DEBUG (14): wb1= 9080.
DEBUG (14): wa2= 0.826000.
DEBUG (14): wb2= 0.908000.
DEBUG (14): a1= 0.
DEBUG (14): temppkt->n1= 6.
DEBUG (14): temppkt->n2= 100.
DEBUG (14): temppkt->n3= 100.
DEBUG (14): temppkt->n4= 100.
DEBUG (14): temppkt->n5= 100.
DEBUG (14): temppkt->n6= 100.
DEBUG (14): m27-14= 0.682689.
DEBUG (14): n27-14= 0.690821.
DEBUG (14): a27-14= 54131.
DEBUG (14): b27-14= 59505.
DEBUG (26): packet received from 27.
DEBUG (26): r273726= 0.
DEBUG (26): r2726= 0.
DEBUG (26): r3726= 0.
DEBUG (26): s26[0]= 0.545500.
DEBUG (26): s26[1]= 1.000000.
DEBUG (26): s26[2]= 0.000000.
DEBUG (26): s26[3]= 0.513500.
DEBUG (26): ws1= 4.
DEBUG (26): ws2= 4.
DEBUG (26): temppkt1= 6.
DEBUG (26): wa1= 9080.
DEBUG (26): wb1= 9750.
DEBUG (26): temppkt2= 9.
DEBUG (26): wa1= 800.
DEBUG (26): wb1= 7500.
DEBUG (26): wa2= 0.080000.
DEBUG (26): wb2= 0.750000.
DEBUG (26): temppkt->n1= 6.
DEBUG (26): temppkt->n2= 9.
DEBUG (26): temppkt->n3= 100.
DEBUG (26): temppkt->n4= 100.
DEBUG (26): temppkt->n5= 100.
DEBUG (26): temppkt->n6= 100.
DEBUG (26): m27-26= 0.690821.
DEBUG (26): n27-26= 0.697597.
DEBUG (26): a27-26= 5242.
DEBUG (26): b27-26= 49151.
DEBUG (48): packet received from 49.
DEBUG (48): r4948= 0.
DEBUG (48): ws1= 4.
DEBUG (48): ws2= 5.
DEBUG (48): wa2= 0.995200.
DEBUG (48): wb2= 1.000000.
DEBUG (48): temppkt->n1= 100.
DEBUG (48): temppkt->n2= 100.
DEBUG (48): temppkt->n3= 100.
DEBUG (48): temppkt->n4= 100.
DEBUG (48): temppkt->n5= 100.
DEBUG (48): temppkt->n6= 100.
DEBUG (48): m49-48= 0.995257.
DEBUG (48): n49-48= 1.000000.
DEBUG (48): a49-48= 65220.
DEBUG (48): b49-48= 65535.
DEBUG (39): packet received from 49.
DEBUG (39): r404939= 0.
DEBUG (39): r4039= 0.
DEBUG (39): r4939= 0.
DEBUG (39): s39[0]= 0.000000.
DEBUG (39): s39[1]= 1.000000.
DEBUG (39): s39[2]= 0.000000.
DEBUG (39): s39[3]= 0.428600.
DEBUG (39): ws1= 4.
DEBUG (39): ws2= 4.
DEBUG (39): temppkt1= 9.
DEBUG (39): wa1= 9160.
DEBUG (39): wb1= 9520.
DEBUG (39): temppkt2= 9.
DEBUG (39): wa1= 1600.
DEBUG (39): wb1= 5200.
DEBUG (39): wa2= 0.160000.
DEBUG (39): wb2= 0.520000.
DEBUG (39): temppkt->n1= 9.
DEBUG (39): temppkt->n2= 9.
DEBUG (39): temppkt->n3= 100.
DEBUG (39): temppkt->n4= 100.
DEBUG (39): temppkt->n5= 100.
DEBUG (39): temppkt->n6= 100.
DEBUG (39): m49-39= 0.991699.
DEBUG (39): n49-39= 0.995257.
DEBUG (39): a49-39= 10485.
DEBUG (39): b49-39= 34078.
DEBUG (22): packet received from 33.
DEBUG (22): r233322= 0.
DEBUG (22): r2322= 0.
DEBUG (22): r3322= 0.
DEBUG (22): s22[0]= 0.485700.
DEBUG (22): s22[1]= 1.000000.
DEBUG (22): s22[2]= 0.000000.
DEBUG (22): s22[3]= 0.561000.
DEBUG (22): ws1= 4.
DEBUG (22): ws2= 4.
DEBUG (22): temppkt1= 7.
DEBUG (22): wa1= 7940.
DEBUG (22): wb1= 9340.
DEBUG (22): wa2= 0.794000.
DEBUG (22): wb2= 0.934000.
DEBUG (22): a1= 0.
DEBUG (22): temppkt->n1= 7.
DEBUG (22): temppkt->n2= 100.
DEBUG (22): temppkt->n3= 100.
DEBUG (22): temppkt->n4= 100.
DEBUG (22): temppkt->n5= 100.
DEBUG (22): temppkt->n6= 100.
DEBUG (22): m33-22= 0.779492.
DEBUG (22): n33-22= 0.793462.
DEBUG (22): a33-22= 52034.
DEBUG (22): b33-22= 61209.
DEBUG (2): packet received from 6.
DEBUG (2): r62= 0.
DEBUG (2): ws1= 4.
DEBUG (2): ws2= 4.
DEBUG (2): wa2= 0.384300.
DEBUG (2): wb2= 0.424100.
DEBUG (2): temppkt->n1= 100.
DEBUG (2): temppkt->n2= 100.
DEBUG (2): temppkt->n3= 100.
DEBUG (2): temppkt->n4= 100.
DEBUG (2): temppkt->n5= 100.
DEBUG (2): temppkt->n6= 100.
DEBUG (2): m6-2= 0.384390.
DEBUG (2): n6-2= 0.424186.
DEBUG (2): a6-2= 25185.
DEBUG (2): b6-2= 27793.
DEBUG (25): packet received from 26.
DEBUG (25): r2625= 0.
DEBUG (25): ws1= 3.
DEBUG (25): ws2= 4.
DEBUG (25): wa2= 0.079900.
DEBUG (25): wb2= 0.749900.
DEBUG (25): temppkt->n1= 6.
DEBUG (25): temppkt->n2= 9.
DEBUG (25): temppkt->n3= 100.
DEBUG (25): temppkt->n4= 100.
DEBUG (25): temppkt->n5= 100.
DEBUG (25): temppkt->n6= 100.
DEBUG (25): m26-25= 0.079988.
DEBUG (25): n26-25= 0.749996.
DEBUG (25): a26-25= 5236.
DEBUG (25): b26-25= 49144.
DEBUG (10): packet received from 11.
DEBUG (10): r112310= 0.
DEBUG (10): r1110= 0.
DEBUG (10): r2310= 0.
DEBUG (10): s10[0]= 0.000000.
DEBUG (10): s10[1]= 1.000000.
DEBUG (10): s10[2]= 0.000000.
DEBUG (10): s10[3]= 0.485700.
DEBUG (10): ws1= 4.
DEBUG (10): ws2= 4.
DEBUG (10): wa2= 0.322900.
DEBUG (10): wb2= 0.952900.
DEBUG (10): temppkt->n1= 7.
DEBUG (10): temppkt->n2= 100.
DEBUG (10): temppkt->n3= 100.
DEBUG (10): temppkt->n4= 100.
DEBUG (10): temppkt->n5= 100.
DEBUG (10): temppkt->n6= 100.
DEBUG (10): m11-10= 0.322988.
DEBUG (10): n11-10= 0.952987.
DEBUG (10): a11-10= 21161.
DEBUG (10): b11-10= 62448.
DEBUG (9): packet received from 43.
DEBUG (9): r439= 0.
DEBUG (9): ws1= 4.
DEBUG (9): ws2= 4.
DEBUG (9): temppkt1= 9.
DEBUG (9): wa1= 550.
DEBUG (9): wb1= 3440.
DEBUG (9): wa2= 0.055000.
DEBUG (9): wb2= 0.344000.
DEBUG (9): a1= 0.
DEBUG (9): temppkt->n1= 9.
DEBUG (9): temppkt->n2= 100.
DEBUG (9): temppkt->n3= 100.
DEBUG (9): temppkt->n4= 100.
DEBUG (9): temppkt->n5= 100.
DEBUG (9): temppkt->n6= 100.
DEBUG (9): m43-9= 0.905592.
DEBUG (9): n43-9= 0.934493.
DEBUG (9): a43-9= 3604.
DEBUG (9): b43-9= 22544.
DEBUG (23): packet received from 24.
DEBUG (23): r2423= 0.
DEBUG (23): ws1= 3.
DEBUG (23): ws2= 4.
DEBUG (23): wa2= 0.043900.
DEBUG (23): wb2= 0.121900.
DEBUG (23): temppkt->n1= 8.
DEBUG (23): temppkt->n2= 100.
DEBUG (23): temppkt->n3= 100.
DEBUG (23): temppkt->n4= 100.
DEBUG (23): temppkt->n5= 100.
DEBUG (23): temppkt->n6= 100.
DEBUG (23): m24-23= 0.043992.
DEBUG (23): n24-23= 0.121996.
DEBUG (23): a24-23= 2876.
DEBUG (23): b24-23= 7988.
DEBUG (28): packet received from 29.
DEBUG (28): r293928= 0.
DEBUG (28): r2928= 0.
DEBUG (28): r3928= 0.
DEBUG (28): s28[0]= 0.541700.
DEBUG (28): s28[1]= 1.000000.
DEBUG (28): s28[2]= 0.000000.
DEBUG (28): s28[3]= 0.464300.
DEBUG (28): ws1= 4.
DEBUG (28): ws2= 4.
DEBUG (28): temppkt3= 4.
DEBUG (28): wa1= 820.
DEBUG (28): wb1= 9980.
DEBUG (28): wa2= 0.082000.
DEBUG (28): wb2= 0.998000.
DEBUG (28): temppkt->n1= 8.
DEBUG (28): temppkt->n2= 9.
DEBUG (28): temppkt->n3= 4.
DEBUG (28): temppkt->n4= 100.
DEBUG (28): temppkt->n5= 100.
DEBUG (28): temppkt->n6= 100.
DEBUG (28): m29-28= 0.408226.
DEBUG (28): n29-28= 0.499886.
DEBUG (28): a29-28= 5373.
DEBUG (28): b29-28= 65403.
DEBUG (26): packet received from 37.
DEBUG (26): r273726= 0.
DEBUG (26): r2726= 0.
DEBUG (26): r3726= 0.
DEBUG (26): s26[0]= 0.545500.
DEBUG (26): s26[1]= 1.000000.
DEBUG (26): s26[2]= 0.000000.
DEBUG (26): s26[3]= 0.513500.
DEBUG (26): ws1= 4.
DEBUG (26): ws2= 4.
DEBUG (26): temppkt2= 6.
DEBUG (26): wa1= 690.
DEBUG (26): wb1= 7060.
DEBUG (26): wa2= 0.069000.
DEBUG (26): wb2= 0.706000.
DEBUG (26): temppkt->n1= 8.
DEBUG (26): temppkt->n2= 6.
DEBUG (26): temppkt->n3= 100.
DEBUG (26): temppkt->n4= 100.
DEBUG (26): temppkt->n5= 100.
DEBUG (26): temppkt->n6= 100.
DEBUG (26): m37-26= 0.606989.
DEBUG (26): n37-26= 0.670668.
DEBUG (26): a37-26= 4521.
DEBUG (26): b37-26= 46267.
DEBUG (1): packet received from 4.
DEBUG (1): r341= 0.
DEBUG (1): r31= 0.
DEBUG (1): r41= 0.
DEBUG (1): s1[0]= 0.000000.
DEBUG (1): s1[1]= 1.000000.
DEBUG (1): s1[2]= 0.000000.
DEBUG (1): s1[3]= 1.000000.
DEBUG (1): ws1= 4.
DEBUG (1): ws2= 4.
DEBUG (1): wa2= 0.146900.
DEBUG (1): wb2= 0.842900.
DEBUG (1): temppkt->n1= 3.
DEBUG (1): temppkt->n2= 100.
DEBUG (1): temppkt->n3= 100.
DEBUG (1): temppkt->n4= 100.
DEBUG (1): temppkt->n5= 100.
DEBUG (1): temppkt->n6= 100.
DEBUG (1): m4-1= 0.146990.
DEBUG (1): n4-1= 0.843000.
DEBUG (1): a4-1= 9627.
DEBUG (1): b4-1= 55239.
DEBUG (50): packet received from 2.
DEBUG (50): sourceid= 6.
DEBUG (50): r1250= 0.
DEBUG (50): r150= 0.
DEBUG (50): r250= 0.
DEBUG (50): s50[0]= 0.000000.
DEBUG (50): s50[1]= 1.000000.
DEBUG (50): s50[2]= 0.000000.
DEBUG (50): s50[3]= 1.000000.
DEBUG (50): a1= 25185.
DEBUG (50): b1= 27793.
DEBUG (50): btrpkt->n1= 100.
DEBUG (50): btrpkt->n2= 100.
DEBUG (50): btrpkt->n3= 100.
DEBUG (50): btrpkt->n4= 100.
DEBUG (50): btrpkt->n5= 100.
DEBUG (50): btrpkt->n6= 100.
DEBUG (50): ws1= 4.
DEBUG (50): ws2= 4.
DEBUG (50): wa2= 0.384200.
DEBUG (50): wb2= 0.424000.
DEBUG (50): btrpkt->n1= 100.
DEBUG (50): btrpkt->n2= 100.
DEBUG (50): btrpkt->n3= 100.
DEBUG (50): btrpkt->n4= 100.
DEBUG (50): btrpkt->n5= 100.
DEBUG (50): btrpkt->n6= 100.
DEBUG (50): m= 0.384298.
DEBUG (50): n= 0.424094.
DEBUG (50): a2= 25178.
DEBUG (50): b2= 27786.
DEBUG (36): packet received from 48.
DEBUG (36): r374836= 0.
DEBUG (36): r3736= 0.
DEBUG (36): r4836= 0.
DEBUG (36): s36[0]= 0.513500.
DEBUG (36): s36[1]= 1.000000.
DEBUG (36): s36[2]= 0.000000.
DEBUG (36): s36[3]= 0.416700.
DEBUG (36): ws1= 4.
DEBUG (36): ws2= 4.
DEBUG (36): temppkt1= 9.
DEBUG (36): wa1= 9510.
DEBUG (36): wb1= 9710.
DEBUG (36): temppkt2= 9.
DEBUG (36): wa1= 5100.
DEBUG (36): wb1= 7100.
DEBUG (36): wa2= 0.510000.
DEBUG (36): wb2= 0.710000.
DEBUG (36): temppkt->n1= 9.
DEBUG (36): temppkt->n2= 9.
DEBUG (36): temppkt->n3= 100.
DEBUG (36): temppkt->n4= 100.
DEBUG (36): temppkt->n5= 100.
DEBUG (36): temppkt->n6= 100.
DEBUG (36): m48-36= 0.995193.
DEBUG (36): n48-36= 0.997196.
DEBUG (36): a48-36= 33422.
DEBUG (36): b48-36= 46529.
DEBUG (47): packet received from 48.
DEBUG (47): r4847= 0.
DEBUG (47): ws1= 4.
DEBUG (47): ws2= 5.
DEBUG (47): wa2= 0.997100.
DEBUG (47): wb2= 1.000000.
DEBUG (47): temppkt->n1= 100.
DEBUG (47): temppkt->n2= 100.
DEBUG (47): temppkt->n3= 100.
DEBUG (47): temppkt->n4= 100.
DEBUG (47): temppkt->n5= 100.
DEBUG (47): temppkt->n6= 100.
DEBUG (47): m48-47= 0.997196.
DEBUG (47): n48-47= 1.000000.
DEBUG (47): a48-47= 65344.
DEBUG (47): b48-47= 65535.
DEBUG (28): packet received from 39.
DEBUG (28): r293928= 0.
DEBUG (28): r2928= 0.
DEBUG (28): r3928= 0.
DEBUG (28): s28[0]= 0.541700.
DEBUG (28): s28[1]= 1.000000.
DEBUG (28): s28[2]= 0.000000.
DEBUG (28): s28[3]= 0.464300.
DEBUG (28): ws1= 4.
DEBUG (28): ws2= 4.
DEBUG (28): wa2= 0.159900.
DEBUG (28): wb2= 0.327100.
DEBUG (28): temppkt->n1= 9.
DEBUG (28): temppkt->n2= 9.
DEBUG (28): temppkt->n3= 100.
DEBUG (28): temppkt->n4= 100.
DEBUG (28): temppkt->n5= 100.
DEBUG (28): temppkt->n6= 100.
DEBUG (28): m39-28= 0.159991.
DEBUG (28): n39-28= 0.327142.
DEBUG (28): a39-28= 10479.
DEBUG (28): b39-28= 21436.
DEBUG (38): packet received from 39.
DEBUG (38): r3938= 0.
DEBUG (38): ws1= 4.
DEBUG (38): ws2= 4.
DEBUG (38): wa2= 0.327100.
DEBUG (38): wb2= 0.519900.
DEBUG (38): temppkt->n1= 9.
DEBUG (38): temppkt->n2= 9.
DEBUG (38): temppkt->n3= 100.
DEBUG (38): temppkt->n4= 100.
DEBUG (38): temppkt->n5= 100.
DEBUG (38): temppkt->n6= 100.
DEBUG (38): m39-38= 0.327142.
DEBUG (38): n39-38= 0.519997.
DEBUG (38): a39-38= 21436.
DEBUG (38): b39-38= 34071.
DEBUG (27): packet received from 28.
DEBUG (27): r2827= 0.
DEBUG (27): ws1= 4.
DEBUG (27): ws2= 4.
DEBUG (27): wa2= 0.159800.
DEBUG (27): wb2= 0.327000.
DEBUG (27): temppkt->n1= 9.
DEBUG (27): temppkt->n2= 9.
DEBUG (27): temppkt->n3= 100.
DEBUG (27): temppkt->n4= 100.
DEBUG (27): temppkt->n5= 100.
DEBUG (27): temppkt->n6= 100.
DEBUG (27): m28-27= 0.159899.
DEBUG (27): n28-27= 0.327092.
DEBUG (27): a28-27= 10472.
DEBUG (27): b28-27= 21429.
DEBUG (12): packet received from 13.
DEBUG (12): r132512= 0.
DEBUG (12): r1312= 0.
DEBUG (12): r2512= 0.
DEBUG (12): s12[0]= 0.000000.
DEBUG (12): s12[1]= 1.000000.
DEBUG (12): s12[2]= 0.000000.
DEBUG (12): s12[3]= 0.511600.
DEBUG (12): ws1= 4.
DEBUG (12): ws2= 4.
DEBUG (12): wa2= 0.795300.
DEBUG (12): wb2= 0.836700.
DEBUG (12): temppkt->n1= 100.
DEBUG (12): temppkt->n2= 100.
DEBUG (12): temppkt->n3= 100.
DEBUG (12): temppkt->n4= 100.
DEBUG (12): temppkt->n5= 100.
DEBUG (12): temppkt->n6= 100.
DEBUG (12): m13-12= 0.795392.
DEBUG (12): n13-12= 0.836789.
DEBUG (12): a13-12= 52119.
DEBUG (12): b13-12= 54833.
DEBUG (50): packet received from 1.
DEBUG (50): sourceid= 5.
DEBUG (50): r1250= 0.
DEBUG (50): r150= 0.
DEBUG (50): r250= 0.
DEBUG (50): s50[0]= 0.000000.
DEBUG (50): s50[1]= 1.000000.
DEBUG (50): s50[2]= 0.000000.
DEBUG (50): s50[3]= 1.000000.
DEBUG (50): a1= 9627.
DEBUG (50): b1= 55239.
DEBUG (50): btrpkt->n1= 3.
DEBUG (50): btrpkt->n2= 100.
DEBUG (50): btrpkt->n3= 100.
DEBUG (50): btrpkt->n4= 100.
DEBUG (50): btrpkt->n5= 100.
DEBUG (50): btrpkt->n6= 100.
DEBUG (50): ws1= 4.
DEBUG (50): ws2= 4.
DEBUG (50): wa2= 0.146800.
DEBUG (50): wb2= 0.842800.
DEBUG (50): btrpkt->n1= 3.
DEBUG (50): btrpkt->n2= 100.
DEBUG (50): btrpkt->n3= 100.
DEBUG (50): btrpkt->n4= 100.
DEBUG (50): btrpkt->n5= 100.
DEBUG (50): btrpkt->n6= 100.
DEBUG (50): m= 0.146899.
DEBUG (50): n= 0.842893.
DEBUG (50): a2= 9620.
DEBUG (50): b2= 55232.
DEBUG (4): packet received from 5.
DEBUG (4): r5784= 0.
DEBUG (4): r54= 0.
DEBUG (4): r74= 0.
DEBUG (4): r84= 0.
DEBUG (4): s4[0]= 0.000000.
DEBUG (4): s4[1]= 1.000000.
DEBUG (4): s4[2]= 0.548400.
DEBUG (4): s4[3]= 1.000000.
DEBUG (4): s4[4]= 0.000000.
DEBUG (4): s4[5]= 0.409100.
DEBUG (4): ws1= 4.
DEBUG (4): ws2= 4.
DEBUG (4): wa2= 0.566900.
DEBUG (4): wb2= 0.659900.
DEBUG (4): temppkt->n1= 5.
DEBUG (4): temppkt->n2= 100.
DEBUG (4): temppkt->n3= 100.
DEBUG (4): temppkt->n4= 100.
DEBUG (4): temppkt->n5= 100.
DEBUG (4): temppkt->n6= 100.
DEBUG (4): m5-4= 0.566995.
DEBUG (4): n5-4= 0.659998.
DEBUG (4): a5-4= 37151.
DEBUG (4): b5-4= 43246.
DEBUG (6): packet received from 9.
DEBUG (6): r96= 0.
DEBUG (6): ws1= 4.
DEBUG (6): ws2= 4.
DEBUG (6): wa2= 0.122000.
DEBUG (6): wb2= 0.222500.
DEBUG (6): temppkt->n1= 9.
DEBUG (6): temppkt->n2= 100.
DEBUG (6): temppkt->n3= 100.
DEBUG (6): temppkt->n4= 100.
DEBUG (6): temppkt->n5= 100.
DEBUG (6): temppkt->n6= 100.
DEBUG (6): m9-6= 0.122014.
DEBUG (6): n9-6= 0.222530.
DEBUG (6): a9-6= 7995.
DEBUG (6): b9-6= 14581.
DEBUG (21): packet received from 9.
DEBUG (21): r921= 0.
DEBUG (21): ws1= 4.
DEBUG (21): ws2= 4.
DEBUG (21): wa2= 0.222500.
DEBUG (21): wb2= 0.343900.
DEBUG (21): temppkt->n1= 9.
DEBUG (21): temppkt->n2= 100.
DEBUG (21): temppkt->n3= 100.
DEBUG (21): temppkt->n4= 100.
DEBUG (21): temppkt->n5= 100.
DEBUG (21): temppkt->n6= 100.
DEBUG (21): m9-21= 0.222530.
DEBUG (21): n9-21= 0.343999.
DEBUG (21): a9-21= 14581.
DEBUG (21): b9-21= 22537.
DEBUG (34): packet received from 46.
DEBUG (34): r354634= 0.
DEBUG (34): r3534= 0.
DEBUG (34): r4634= 0.
DEBUG (34): s34[0]= 0.448300.
DEBUG (34): s34[1]= 1.000000.
DEBUG (34): s34[2]= 0.000000.
DEBUG (34): s34[3]= 0.466700.
DEBUG (34): ws1= 4.
DEBUG (34): ws2= 4.
DEBUG (34): temppkt2= 8.
DEBUG (34): wa1= 7780.
DEBUG (34): wb1= 9560.
DEBUG (34): wa2= 0.778000.
DEBUG (34): wb2= 0.956000.
DEBUG (34): temppkt->n1= 9.
DEBUG (34): temppkt->n2= 8.
DEBUG (34): temppkt->n3= 100.
DEBUG (34): temppkt->n4= 100.
DEBUG (34): temppkt->n5= 100.
DEBUG (34): temppkt->n6= 100.
DEBUG (34): m46-34= 0.877897.
DEBUG (34): n46-34= 0.895630.
DEBUG (34): a46-34= 50986.
DEBUG (34): b46-34= 62651.
DEBUG (45): packet received from 46.
DEBUG (45): r4645= 0.
DEBUG (45): ws1= 4.
DEBUG (45): ws2= 4.
DEBUG (45): wa2= 0.895600.
DEBUG (45): wb2= 0.915800.
DEBUG (45): temppkt->n1= 9.
DEBUG (45): temppkt->n2= 100.
DEBUG (45): temppkt->n3= 100.
DEBUG (45): temppkt->n4= 100.
DEBUG (45): temppkt->n5= 100.
DEBUG (45): temppkt->n6= 100.
DEBUG (45): m46-45= 0.895630.
DEBUG (45): n46-45= 0.915892.
DEBUG (45): a46-45= 58693.
DEBUG (45): b46-45= 60016.
DEBUG (24): packet received from 25.
DEBUG (24): r253524= 0.
DEBUG (24): r2524= 0.
DEBUG (24): r3524= 0.
DEBUG (24): s24[0]= 0.511600.
DEBUG (24): s24[1]= 1.000000.
DEBUG (24): s24[2]= 0.000000.
DEBUG (24): s24[3]= 0.448300.
DEBUG (24): ws1= 4.
DEBUG (24): ws2= 4.
DEBUG (24): wa2= 0.422600.
DEBUG (24): wb2= 0.749800.
DEBUG (24): temppkt->n1= 6.
DEBUG (24): temppkt->n2= 9.
DEBUG (24): temppkt->n3= 100.
DEBUG (24): temppkt->n4= 100.
DEBUG (24): temppkt->n5= 100.
DEBUG (24): temppkt->n6= 100.
DEBUG (24): m25-24= 0.422665.
DEBUG (24): n25-24= 0.749889.
DEBUG (24): a25-24= 27695.
DEBUG (24): b25-24= 49138.
DEBUG (33): packet received from 34.
DEBUG (33): r3433= 0.
DEBUG (33): ws1= 4.
DEBUG (33): ws2= 4.
DEBUG (33): wa2= 0.777900.
DEBUG (33): wb2= 0.955900.
DEBUG (33): temppkt->n1= 9.
DEBUG (33): temppkt->n2= 8.
DEBUG (33): temppkt->n3= 100.
DEBUG (33): temppkt->n4= 100.
DEBUG (33): temppkt->n5= 100.
DEBUG (33): temppkt->n6= 100.
DEBUG (33): m34-33= 0.777996.
DEBUG (33): n34-33= 0.955993.
DEBUG (33): a34-33= 50979.
DEBUG (33): b34-33= 62644.
DEBUG (2): packet received from 6.
DEBUG (2): r62= 0.
DEBUG (2): ws1= 4.
DEBUG (2): ws2= 4.
DEBUG (2): wa2= 0.121900.
DEBUG (2): wb2= 0.222400.
DEBUG (2): temppkt->n1= 9.
DEBUG (2): temppkt->n2= 100.
DEBUG (2): temppkt->n3= 100.
DEBUG (2): temppkt->n4= 100.
DEBUG (2): temppkt->n5= 100.
DEBUG (2): temppkt->n6= 100.
DEBUG (2): m6-2= 0.121996.
DEBUG (2): n6-2= 0.222492.
DEBUG (2): a6-2= 7988.
DEBUG (2): b6-2= 14574.
DEBUG (46): packet received from 47.
DEBUG (46): r4746= 0.
DEBUG (46): ws1= 4.
DEBUG (46): ws2= 5.
DEBUG (46): wa2= 0.997000.
DEBUG (46): wb2= 1.000000.
DEBUG (46): temppkt->n1= 100.
DEBUG (46): temppkt->n2= 100.
DEBUG (46): temppkt->n3= 100.
DEBUG (46): temppkt->n4= 100.
DEBUG (46): temppkt->n5= 100.
DEBUG (46): temppkt->n6= 100.
DEBUG (46): m47-46= 0.997086.
DEBUG (46): n47-46= 1.000000.
DEBUG (46): a47-46= 65338.
DEBUG (46): b47-46= 65535.
DEBUG (7): packet received from 22.
DEBUG (7): r10227= 0.
DEBUG (7): r107= 0.
DEBUG (7): r227= 0.
DEBUG (7): s7[0]= 0.000000.
DEBUG (7): s7[1]= 1.000000.
DEBUG (7): s7[2]= 0.000000.
DEBUG (7): s7[3]= 1.000000.
DEBUG (7): ws1= 4.
DEBUG (7): ws2= 4.
DEBUG (7): wa2= 0.793900.
DEBUG (7): wb2= 0.933900.
DEBUG (7): temppkt->n1= 7.
DEBUG (7): temppkt->n2= 100.
DEBUG (7): temppkt->n3= 100.
DEBUG (7): temppkt->n4= 100.
DEBUG (7): temppkt->n5= 100.
DEBUG (7): temppkt->n6= 100.
DEBUG (7): m22-7= 0.793988.
DEBUG (7): n22-7= 0.933989.
DEBUG (7): a22-7= 52028.
DEBUG (7): b22-7= 61203.
DEBUG (11): packet received from 12.
DEBUG (11): r1211= 0.
DEBUG (11): ws1= 4.
DEBUG (11): ws2= 4.
DEBUG (11): wa2= 0.795200.
DEBUG (11): wb2= 0.836600.
DEBUG (11): temppkt->n1= 100.
DEBUG (11): temppkt->n2= 100.
DEBUG (11): temppkt->n3= 100.
DEBUG (11): temppkt->n4= 100.
DEBUG (11): temppkt->n5= 100.
DEBUG (11): temppkt->n6= 100.
DEBUG (11): m12-11= 0.795285.
DEBUG (11): n12-11= 0.836698.
DEBUG (11): a12-11= 52113.
DEBUG (11): b12-11= 54826.
DEBUG (34): packet received from 46.
DEBUG (34): r354634= 0.
DEBUG (34): r3534= 0.
DEBUG (34): r4634= 0.
DEBUG (34): s34[0]= 0.448300.
DEBUG (34): s34[1]= 1.000000.
DEBUG (34): s34[2]= 0.000000.
DEBUG (34): s34[3]= 0.466700.
DEBUG (34): ws1= 4.
DEBUG (34): ws2= 4.
DEBUG (34): temppkt1= 9.
DEBUG (34): wa1= 9690.
DEBUG (34): wb1= 9830.
DEBUG (34): temppkt2= 9.
DEBUG (34): wa1= 6900.
DEBUG (34): wb1= 8300.
DEBUG (34): wa2= 0.690000.
DEBUG (34): wb2= 0.830000.
DEBUG (34): temppkt->n1= 9.
DEBUG (34): temppkt->n2= 9.
DEBUG (34): temppkt->n3= 100.
DEBUG (34): temppkt->n4= 100.
DEBUG (34): temppkt->n5= 100.
DEBUG (34): temppkt->n6= 100.
DEBUG (34): m46-34= 0.996994.
DEBUG (34): n46-34= 0.998397.
DEBUG (34): a46-34= 45219.
DEBUG (34): b46-34= 54394.
DEBUG (8): packet received from 21.
DEBUG (8): r218= 0.
DEBUG (8): ws1= 4.
DEBUG (8): ws2= 4.
DEBUG (8): wa2= 0.222400.
DEBUG (8): wb2= 0.343800.
DEBUG (8): temppkt->n1= 9.
DEBUG (8): temppkt->n2= 100.
DEBUG (8): temppkt->n3= 100.
DEBUG (8): temppkt->n4= 100.
DEBUG (8): temppkt->n5= 100.
DEBUG (8): temppkt->n6= 100.
DEBUG (8): m21-8= 0.222492.
DEBUG (8): n21-8= 0.343893.
DEBUG (8): a21-8= 14574.
DEBUG (8): b21-8= 22530.
DEBUG (26): packet received from 27.
DEBUG (26): r273726= 0.
DEBUG (26): r2726= 0.
DEBUG (26): r3726= 0.
DEBUG (26): s26[0]= 0.545500.
DEBUG (26): s26[1]= 1.000000.
DEBUG (26): s26[2]= 0.000000.
DEBUG (26): s26[3]= 0.513500.
DEBUG (26): ws1= 4.
DEBUG (26): ws2= 4.
DEBUG (26): wa2= 0.250900.
DEBUG (26): wb2= 0.326900.
DEBUG (26): temppkt->n1= 9.
DEBUG (26): temppkt->n2= 9.
DEBUG (26): temppkt->n3= 100.
DEBUG (26): temppkt->n4= 100.
DEBUG (26): temppkt->n5= 100.
DEBUG (26): temppkt->n6= 100.
DEBUG (26): m27-26= 0.250996.
DEBUG (26): n27-26= 0.326986.
DEBUG (26): a27-26= 16442.
DEBUG (26): b27-26= 21423.
DEBUG (14): packet received from 27.
DEBUG (14): r152714= 0.
DEBUG (14): r1514= 0.
DEBUG (14): r2714= 0.
DEBUG (14): s14[0]= 0.000000.
DEBUG (14): s14[1]= 1.000000.
DEBUG (14): s14[2]= 0.000000.
DEBUG (14): s14[3]= 0.545500.
DEBUG (14): ws1= 4.
DEBUG (14): ws2= 4.
DEBUG (14): wa2= 0.159700.
DEBUG (14): wb2= 0.250900.
DEBUG (14): temppkt->n1= 9.
DEBUG (14): temppkt->n2= 9.
DEBUG (14): temppkt->n3= 100.
DEBUG (14): temppkt->n4= 100.
DEBUG (14): temppkt->n5= 100.
DEBUG (14): temppkt->n6= 100.
DEBUG (14): m27-14= 0.159792.
DEBUG (14): n27-14= 0.250996.
DEBUG (14): a27-14= 10465.
DEBUG (14): b27-14= 16442.
DEBUG (10): packet received from 11.
DEBUG (10): r112310= 0.
DEBUG (10): r1110= 0.
DEBUG (10): r2310= 0.
DEBUG (10): s10[0]= 0.000000.
DEBUG (10): s10[1]= 1.000000.
DEBUG (10): s10[2]= 0.000000.
DEBUG (10): s10[3]= 0.485700.
DEBUG (10): ws1= 4.
DEBUG (10): ws2= 4.
DEBUG (10): wa2= 0.795100.
DEBUG (10): wb2= 0.836500.
DEBUG (10): temppkt->n1= 100.
DEBUG (10): temppkt->n2= 100.
DEBUG (10): temppkt->n3= 100.
DEBUG (10): temppkt->n4= 100.
DEBUG (10): temppkt->n5= 100.
DEBUG (10): temppkt->n6= 100.
DEBUG (10): m11-10= 0.795193.
DEBUG (10): n11-10= 0.836591.
DEBUG (10): a11-10= 52106.
DEBUG (10): b11-10= 54820.
DEBUG (1): packet received from 4.
DEBUG (1): r341= 0.
DEBUG (1): r31= 0.
DEBUG (1): r41= 0.
DEBUG (1): s1[0]= 0.000000.
DEBUG (1): s1[1]= 1.000000.
DEBUG (1): s1[2]= 0.000000.
DEBUG (1): s1[3]= 1.000000.
DEBUG (1): ws1= 4.
DEBUG (1): ws2= 4.
DEBUG (1): wa2= 0.566800.
DEBUG (1): wb2= 0.659800.
DEBUG (1): temppkt->n1= 5.
DEBUG (1): temppkt->n2= 100.
DEBUG (1): temppkt->n3= 100.
DEBUG (1): temppkt->n4= 100.
DEBUG (1): temppkt->n5= 100.
DEBUG (1): temppkt->n6= 100.
DEBUG (1): m4-1= 0.566888.
DEBUG (1): n4-1= 0.659892.
DEBUG (1): a4-1= 37145.
DEBUG (1): b4-1= 43239.
DEBUG (44): packet received from 45.
DEBUG (44): r4544= 0.
DEBUG (44): ws1= 4.
DEBUG (44): ws2= 4.
DEBUG (44): wa2= 0.895500.
DEBUG (44): wb2= 0.915700.
DEBUG (44): temppkt->n1= 9.
DEBUG (44): temppkt->n2= 100.
DEBUG (44): temppkt->n3= 100.
DEBUG (44): temppkt->n4= 100.
DEBUG (44): temppkt->n5= 100.
DEBUG (44): temppkt->n6= 100.
DEBUG (44): m45-44= 0.895598.
DEBUG (44): n45-44= 0.915785.
DEBUG (44): a45-44= 58686.
DEBUG (44): b45-44= 60010.
DEBUG (5): packet received from 8.
DEBUG (5): r895= 0.
DEBUG (5): r85= 0.
DEBUG (5): r95= 0.
DEBUG (5): s5[0]= 0.409100.
DEBUG (5): s5[1]= 1.000000.
DEBUG (5): s5[2]= 0.000000.
DEBUG (5): s5[3]= 0.231900.
DEBUG (5): ws1= 4.
DEBUG (5): ws2= 4.
DEBUG (5): wa2= 0.272000.
DEBUG (5): wb2= 0.343700.
DEBUG (5): temppkt->n1= 9.
DEBUG (5): temppkt->n2= 100.
DEBUG (5): temppkt->n3= 100.
DEBUG (5): temppkt->n4= 100.
DEBUG (5): temppkt->n5= 100.
DEBUG (5): temppkt->n6= 100.
DEBUG (5): m8-5= 0.272050.
DEBUG (5): n8-5= 0.343786.
DEBUG (5): a8-5= 17825.
DEBUG (5): b8-5= 22524.
DEBUG (13): packet received from 14.
DEBUG (13): r1413= 0.
DEBUG (13): ws1= 4.
DEBUG (13): ws2= 4.
DEBUG (13): wa2= 0.159600.
DEBUG (13): wb2= 0.250800.
DEBUG (13): temppkt->n1= 9.
DEBUG (13): temppkt->n2= 9.
DEBUG (13): temppkt->n3= 100.
DEBUG (13): temppkt->n4= 100.
DEBUG (13): temppkt->n5= 100.
DEBUG (13): temppkt->n6= 100.
DEBUG (13): m14-13= 0.159686.
DEBUG (13): n14-13= 0.250889.
DEBUG (13): a14-13= 10459.
DEBUG (13): b14-13= 16436.
DEBUG (43): packet received from 33.
DEBUG (43): r334443= 0.
DEBUG (43): r3343= 0.
DEBUG (43): r4443= 0.
DEBUG (43): s43[0]= 0.561000.
DEBUG (43): s43[1]= 1.000000.
DEBUG (43): s43[2]= 0.000000.
DEBUG (43): s43[3]= 1.000000.
DEBUG (43): ws1= 4.
DEBUG (43): ws2= 4.
DEBUG (43): wa2= 0.877700.
DEBUG (43): wb2= 0.777800.
DEBUG (43): temppkt->n1= 9.
DEBUG (43): temppkt->n2= 8.
DEBUG (43): temppkt->n3= 100.
DEBUG (43): temppkt->n4= 100.
DEBUG (43): temppkt->n5= 100.
DEBUG (43): temppkt->n6= 100.
DEBUG (43): m33-43= 0.877746.
DEBUG (43): n33-43= 0.777890.
DEBUG (43): a33-43= 57520.
DEBUG (43): b33-43= 50973.
DEBUG (22): packet received from 33.
DEBUG (22): r233322= 0.
DEBUG (22): r2322= 0.
DEBUG (22): r3322= 0.
DEBUG (22): s22[0]= 0.485700.
DEBUG (22): s22[1]= 1.000000.
DEBUG (22): s22[2]= 0.000000.
DEBUG (22): s22[3]= 0.561000.
DEBUG (22): ws1= 4.
DEBUG (22): ws2= 4.
DEBUG (22): wa2= 0.777800.
DEBUG (22): wb2= 0.877700.
DEBUG (22): temppkt->n1= 9.
DEBUG (22): temppkt->n2= 8.
DEBUG (22): temppkt->n3= 100.
DEBUG (22): temppkt->n4= 100.
DEBUG (22): temppkt->n5= 100.
DEBUG (22): temppkt->n6= 100.
DEBUG (22): m33-22= 0.777890.
DEBUG (22): n33-22= 0.877746.
DEBUG (22): a33-22= 50973.
DEBUG (22): b33-22= 57520.
DEBUG (33): packet received from 34.
DEBUG (33): r3433= 0.
DEBUG (33): ws1= 4.
DEBUG (33): ws2= 4.
DEBUG (33): wa2= 0.689900.
DEBUG (33): wb2= 0.829900.
DEBUG (33): temppkt->n1= 9.
DEBUG (33): temppkt->n2= 9.
DEBUG (33): temppkt->n3= 100.
DEBUG (33): temppkt->n4= 100.
DEBUG (33): temppkt->n5= 100.
DEBUG (33): temppkt->n6= 100.
DEBUG (33): m34-33= 0.689998.
DEBUG (33): n34-33= 0.829999.
DEBUG (33): a34-33= 45212.
DEBUG (33): b34-33= 54387.
DEBUG (50): packet received from 2.
DEBUG (50): sourceid= 43.
DEBUG (50): r1250= 0.
DEBUG (50): r150= 0.
DEBUG (50): r250= 0.
DEBUG (50): s50[0]= 0.000000.
DEBUG (50): s50[1]= 1.000000.
DEBUG (50): s50[2]= 0.000000.
DEBUG (50): s50[3]= 1.000000.
DEBUG (50): a1= 7988.
DEBUG (50): b1= 14574.
DEBUG (50): btrpkt->n1= 9.
DEBUG (50): btrpkt->n2= 100.
DEBUG (50): btrpkt->n3= 100.
DEBUG (50): btrpkt->n4= 100.
DEBUG (50): btrpkt->n5= 100.
DEBUG (50): btrpkt->n6= 100.
DEBUG (50): ws1= 4.
DEBUG (50): ws2= 4.
DEBUG (50): wa2= 0.121800.
DEBUG (50): wb2= 0.222300.
DEBUG (50): btrpkt->n1= 9.
DEBUG (50): btrpkt->n2= 100.
DEBUG (50): btrpkt->n3= 100.
DEBUG (50): btrpkt->n4= 100.
DEBUG (50): btrpkt->n5= 100.
DEBUG (50): btrpkt->n6= 100.
DEBUG (50): m= 0.121889.
DEBUG (50): n= 0.222385.
DEBUG (50): a2= 7982.
DEBUG (50): b2= 14568.
DEBUG (23): packet received from 24.
DEBUG (23): r2423= 0.
DEBUG (23): ws1= 4.
DEBUG (23): ws2= 4.
DEBUG (23): wa2= 0.422500.
DEBUG (23): wb2= 0.749700.
DEBUG (23): temppkt->n1= 6.
DEBUG (23): temppkt->n2= 9.
DEBUG (23): temppkt->n3= 100.
DEBUG (23): temppkt->n4= 100.
DEBUG (23): temppkt->n5= 100.
DEBUG (23): temppkt->n6= 100.
DEBUG (23): m24-23= 0.422599.
DEBUG (23): n24-23= 0.749798.
DEBUG (23): a24-23= 27688.
DEBUG (23): b24-23= 49131.
DEBUG (25): packet received from 26.
DEBUG (25): r2625= 0.
DEBUG (25): ws1= 4.
DEBUG (25): ws2= 4.
DEBUG (25): wa2= 0.250800.
DEBUG (25): wb2= 0.326800.
DEBUG (25): temppkt->n1= 9.
DEBUG (25): temppkt->n2= 9.
DEBUG (25): temppkt->n3= 100.
DEBUG (25): temppkt->n4= 100.
DEBUG (25): temppkt->n5= 100.
DEBUG (25): temppkt->n6= 100.
DEBUG (25): m26-25= 0.250889.
DEBUG (25): n26-25= 0.326894.
DEBUG (25): a26-25= 16436.
DEBUG (25): b26-25= 21416.
DEBUG (12): packet received from 13.
DEBUG (12): r132512= 0.
DEBUG (12): r1312= 0.
DEBUG (12): r2512= 0.
DEBUG (12): s12[0]= 0.000000.
DEBUG (12): s12[1]= 1.000000.
DEBUG (12): s12[2]= 0.000000.
DEBUG (12): s12[3]= 0.511600.
DEBUG (12): ws1= 4.
DEBUG (12): ws2= 4.
DEBUG (12): wa2= 0.159500.
DEBUG (12): wb2= 0.250700.
DEBUG (12): temppkt->n1= 9.
DEBUG (12): temppkt->n2= 9.
DEBUG (12): temppkt->n3= 100.
DEBUG (12): temppkt->n4= 100.
DEBUG (12): temppkt->n5= 100.
DEBUG (12): temppkt->n6= 100.
DEBUG (12): m13-12= 0.159594.
DEBUG (12): n13-12= 0.250797.
DEBUG (12): a13-12= 10452.
DEBUG (12): b13-12= 16429.
DEBUG (7): packet received from 10.
DEBUG (7): r10227= 0.
DEBUG (7): r107= 0.
DEBUG (7): r227= 0.
DEBUG (7): s7[0]= 0.000000.
DEBUG (7): s7[1]= 1.000000.
DEBUG (7): s7[2]= 0.000000.
DEBUG (7): s7[3]= 1.000000.
DEBUG (7): ws1= 4.
DEBUG (7): ws2= 4.
DEBUG (7): wa2= 0.795000.
DEBUG (7): wb2= 0.836400.
DEBUG (7): temppkt->n1= 100.
DEBUG (7): temppkt->n2= 100.
DEBUG (7): temppkt->n3= 100.
DEBUG (7): temppkt->n4= 100.
DEBUG (7): temppkt->n5= 100.
DEBUG (7): temppkt->n6= 100.
DEBUG (7): m10-7= 0.795087.
DEBUG (7): n10-7= 0.836500.
DEBUG (7): a10-7= 52100.
DEBUG (7): b10-7= 54813.
DEBUG (9): packet received from 43.
DEBUG (9): r439= 0.
DEBUG (9): ws1= 4.
DEBUG (9): ws2= 4.
DEBUG (9): wa2= 0.877600.
DEBUG (9): wb2= 0.777700.
DEBUG (9): temppkt->n1= 9.
DEBUG (9): temppkt->n2= 8.
DEBUG (9): temppkt->n3= 100.
DEBUG (9): temppkt->n4= 100.
DEBUG (9): temppkt->n5= 100.
DEBUG (9): temppkt->n6= 100.
DEBUG (9): m43-9= 0.877699.
DEBUG (9): n43-9= 0.777798.
DEBUG (9): a43-9= 57513.
DEBUG (9): b43-9= 50966.
DEBUG (50): packet received from 1.
DEBUG (50): sourceid= 9.
DEBUG (50): r1250= 0.
DEBUG (50): r150= 0.
DEBUG (50): r250= 0.
DEBUG (50): s50[0]= 0.000000.
DEBUG (50): s50[1]= 1.000000.
DEBUG (50): s50[2]= 0.000000.
DEBUG (50): s50[3]= 1.000000.
DEBUG (50): a1= 37145.
DEBUG (50): b1= 43239.
DEBUG (50): btrpkt->n1= 5.
DEBUG (50): btrpkt->n2= 100.
DEBUG (50): btrpkt->n3= 100.
DEBUG (50): btrpkt->n4= 100.
DEBUG (50): btrpkt->n5= 100.
DEBUG (50): btrpkt->n6= 100.
DEBUG (50): ws1= 4.
DEBUG (50): ws2= 4.
DEBUG (50): wa2= 0.566700.
DEBUG (50): wb2= 0.659700.
DEBUG (50): btrpkt->n1= 5.
DEBUG (50): btrpkt->n2= 100.
DEBUG (50): btrpkt->n3= 100.
DEBUG (50): btrpkt->n4= 100.
DEBUG (50): btrpkt->n5= 100.
DEBUG (50): btrpkt->n6= 100.
DEBUG (50): m= 0.566796.
DEBUG (50): n= 0.659785.
DEBUG (50): a2= 37138.
DEBUG (50): b2= 43233.
DEBUG (10): packet received from 23.
DEBUG (10): r112310= 0.
DEBUG (10): r1110= 0.
DEBUG (10): r2310= 0.
DEBUG (10): s10[0]= 0.000000.
DEBUG (10): s10[1]= 1.000000.
DEBUG (10): s10[2]= 0.000000.
DEBUG (10): s10[3]= 0.485700.
DEBUG (10): ws1= 4.
DEBUG (10): ws2= 4.
DEBUG (10): wa2= 0.422400.
DEBUG (10): wb2= 0.581400.
DEBUG (10): temppkt->n1= 6.
DEBUG (10): temppkt->n2= 9.
DEBUG (10): temppkt->n3= 100.
DEBUG (10): temppkt->n4= 100.
DEBUG (10): temppkt->n5= 100.
DEBUG (10): temppkt->n6= 100.
DEBUG (10): m23-10= 0.422492.
DEBUG (10): n23-10= 0.581412.
DEBUG (10): a23-10= 27681.
DEBUG (10): b23-10= 38102.
DEBUG (21): packet received from 9.
DEBUG (21): r921= 0.
DEBUG (21): ws1= 4.
DEBUG (21): ws2= 4.
DEBUG (21): wa2= 0.819600.
DEBUG (21): wb2= 0.777600.
DEBUG (21): temppkt->n1= 9.
DEBUG (21): temppkt->n2= 8.
DEBUG (21): temppkt->n3= 100.
DEBUG (21): temppkt->n4= 100.
DEBUG (21): temppkt->n5= 100.
DEBUG (21): temppkt->n6= 100.
DEBUG (21): m9-21= 0.819680.
DEBUG (21): n9-21= 0.777691.
DEBUG (21): a9-21= 53712.
DEBUG (21): b9-21= 50960.
DEBUG (6): packet received from 9.
DEBUG (6): r96= 0.
DEBUG (6): ws1= 4.
DEBUG (6): ws2= 4.
DEBUG (6): temppkt3= 8.
DEBUG (6): wa1= 5440.
DEBUG (6): wb1= 1960.
DEBUG (6): wa2= 0.544000.
DEBUG (6): wb2= 0.196000.
DEBUG (6): temppkt->n1= 9.
DEBUG (6): temppkt->n2= 8.
DEBUG (6): temppkt->n3= 8.
DEBUG (6): temppkt->n4= 100.
DEBUG (6): temppkt->n5= 100.
DEBUG (6): temppkt->n6= 100.
DEBUG (6): m9-6= 0.854425.
DEBUG (6): n9-6= 0.819680.
DEBUG (6): a9-6= 35651.
DEBUG (6): b9-6= 12844.
DEBUG (43): packet received from 33.
DEBUG (43): r334443= 0.
DEBUG (43): r3343= 0.
DEBUG (43): r4443= 0.
DEBUG (43): s43[0]= 0.561000.
DEBUG (43): s43[1]= 1.000000.
DEBUG (43): s43[2]= 0.000000.
DEBUG (43): s43[3]= 1.000000.
DEBUG (43): ws1= 4.
DEBUG (43): ws2= 4.
DEBUG (43): wa2= 0.768400.
DEBUG (43): wb2= 0.689800.
DEBUG (43): temppkt->n1= 9.
DEBUG (43): temppkt->n2= 9.
DEBUG (43): temppkt->n3= 100.
DEBUG (43): temppkt->n4= 100.
DEBUG (43): temppkt->n5= 100.
DEBUG (43): temppkt->n6= 100.
DEBUG (43): m33-43= 0.768432.
DEBUG (43): n33-43= 0.689891.
DEBUG (43): a33-43= 50357.
DEBUG (43): b33-43= 45206.
DEBUG (3): packet received from 7.
DEBUG (3): r73= 0.
DEBUG (3): ws1= 4.
DEBUG (3): ws2= 4.
DEBUG (3): wa2= 0.794900.
DEBUG (3): wb2= 0.817600.
DEBUG (3): temppkt->n1= 100.
DEBUG (3): temppkt->n2= 100.
DEBUG (3): temppkt->n3= 100.
DEBUG (3): temppkt->n4= 100.
DEBUG (3): temppkt->n5= 100.
DEBUG (3): temppkt->n6= 100.
DEBUG (3): m7-3= 0.794995.
DEBUG (3): n7-3= 0.817698.
DEBUG (3): a7-3= 52093.
DEBUG (3): b7-3= 53581.
DEBUG (24): packet received from 25.
DEBUG (24): r253524= 0.
DEBUG (24): r2524= 0.
DEBUG (24): r3524= 0.
DEBUG (24): s24[0]= 0.511600.
DEBUG (24): s24[1]= 1.000000.
DEBUG (24): s24[2]= 0.000000.
DEBUG (24): s24[3]= 0.448300.
DEBUG (24): ws1= 4.
DEBUG (24): ws2= 4.
DEBUG (24): wa2= 0.289600.
DEBUG (24): wb2= 0.326700.
DEBUG (24): temppkt->n1= 9.
DEBUG (24): temppkt->n2= 9.
DEBUG (24): temppkt->n3= 100.
DEBUG (24): temppkt->n4= 100.
DEBUG (24): temppkt->n5= 100.
DEBUG (24): temppkt->n6= 100.
DEBUG (24): m25-24= 0.289674.
DEBUG (24): n25-24= 0.326787.
DEBUG (24): a25-24= 18978.
DEBUG (24): b25-24= 21410.
DEBUG (12): packet received from 25.
DEBUG (12): r132512= 0.
DEBUG (12): r1312= 0.
DEBUG (12): r2512= 0.
DEBUG (12): s12[0]= 0.000000.
DEBUG (12): s12[1]= 1.000000.
DEBUG (12): s12[2]= 0.000000.
DEBUG (12): s12[3]= 0.511600.
DEBUG (12): ws1= 4.
DEBUG (12): ws2= 4.
DEBUG (12): temppkt3= 2.
DEBUG (12): wa1= 5070.
DEBUG (12): wb1= 8960.
DEBUG (12): wa2= 0.507000.
DEBUG (12): wb2= 0.896000.
DEBUG (12): temppkt->n1= 9.
DEBUG (12): temppkt->n2= 9.
DEBUG (12): temppkt->n3= 2.
DEBUG (12): temppkt->n4= 100.
DEBUG (12): temppkt->n5= 100.
DEBUG (12): temppkt->n6= 100.
DEBUG (12): m25-12= 0.250797.
DEBUG (12): n25-12= 0.289674.
DEBUG (12): a25-12= 33226.
DEBUG (12): b25-12= 58719.
DEBUG (11): packet received from 12.
DEBUG (11): r1211= 0.
DEBUG (11): ws1= 4.
DEBUG (11): ws2= 4.
DEBUG (11): wa2= 0.506900.
DEBUG (11): wb2= 0.895900.
DEBUG (11): temppkt->n1= 9.
DEBUG (11): temppkt->n2= 9.
DEBUG (11): temppkt->n3= 2.
DEBUG (11): temppkt->n4= 100.
DEBUG (11): temppkt->n5= 100.
DEBUG (11): temppkt->n6= 100.
DEBUG (11): m12-11= 0.506996.
DEBUG (11): n12-11= 0.895994.
DEBUG (11): a12-11= 33219.
DEBUG (11): b12-11= 58712.
DEBUG (7): packet received from 10.
DEBUG (7): r10227= 0.
DEBUG (7): r107= 0.
DEBUG (7): r227= 0.
DEBUG (7): s7[0]= 0.000000.
DEBUG (7): s7[1]= 1.000000.
DEBUG (7): s7[2]= 0.000000.
DEBUG (7): s7[3]= 1.000000.
DEBUG (7): ws1= 4.
DEBUG (7): ws2= 4.
DEBUG (7): wa2= 0.422300.
DEBUG (7): wb2= 0.581300.
DEBUG (7): temppkt->n1= 6.
DEBUG (7): temppkt->n2= 9.
DEBUG (7): temppkt->n3= 100.
DEBUG (7): temppkt->n4= 100.
DEBUG (7): temppkt->n5= 100.
DEBUG (7): temppkt->n6= 100.
DEBUG (7): m10-7= 0.422385.
DEBUG (7): n10-7= 0.581399.
DEBUG (7): a10-7= 27675.
DEBUG (7): b10-7= 38095.
DEBUG (1): packet received from 3.
DEBUG (1): r341= 0.
DEBUG (1): r31= 0.
DEBUG (1): r41= 0.
DEBUG (1): s1[0]= 0.000000.
DEBUG (1): s1[1]= 1.000000.
DEBUG (1): s1[2]= 0.000000.
DEBUG (1): s1[3]= 1.000000.
DEBUG (1): ws1= 4.
DEBUG (1): ws2= 4.
DEBUG (1): wa2= 0.794800.
DEBUG (1): wb2= 0.817500.
DEBUG (1): temppkt->n1= 100.
DEBUG (1): temppkt->n2= 100.
DEBUG (1): temppkt->n3= 100.
DEBUG (1): temppkt->n4= 100.
DEBUG (1): temppkt->n5= 100.
DEBUG (1): temppkt->n6= 100.
DEBUG (1): m3-1= 0.794888.
DEBUG (1): n3-1= 0.817594.
DEBUG (1): a3-1= 52087.
DEBUG (1): b3-1= 53574.
DEBUG (4): packet received from 7.
DEBUG (4): r5784= 0.
DEBUG (4): r54= 0.
DEBUG (4): r74= 0.
DEBUG (4): r84= 0.
DEBUG (4): s4[0]= 0.000000.
DEBUG (4): s4[1]= 1.000000.
DEBUG (4): s4[2]= 0.548400.
DEBUG (4): s4[3]= 1.000000.
DEBUG (4): s4[4]= 0.000000.
DEBUG (4): s4[5]= 0.409100.
DEBUG (4): ws1= 4.
DEBUG (4): ws2= 4.
DEBUG (4): temppkt3= 5.
DEBUG (4): wa1= 940.
DEBUG (4): wb1= 8120.
DEBUG (4): wa2= 0.094000.
DEBUG (4): wb2= 0.812000.
DEBUG (4): temppkt->n1= 6.
DEBUG (4): temppkt->n2= 9.
DEBUG (4): temppkt->n3= 5.
DEBUG (4): temppkt->n4= 100.
DEBUG (4): temppkt->n5= 100.
DEBUG (4): temppkt->n6= 100.
DEBUG (4): m7-4= 0.509488.
DEBUG (4): n7-4= 0.581292.
DEBUG (4): a7-4= 6160.
DEBUG (4): b7-4= 53214.
DEBUG (23): packet received from 24.
DEBUG (23): r2423= 0.
DEBUG (23): ws1= 4.
DEBUG (23): ws2= 4.
DEBUG (23): wa2= 0.289500.
DEBUG (23): wb2= 0.326600.
DEBUG (23): temppkt->n1= 9.
DEBUG (23): temppkt->n2= 9.
DEBUG (23): temppkt->n3= 100.
DEBUG (23): temppkt->n4= 100.
DEBUG (23): temppkt->n5= 100.
DEBUG (23): temppkt->n6= 100.
DEBUG (23): m24-23= 0.289586.
DEBUG (23): n24-23= 0.326696.
DEBUG (23): a24-23= 18972.
DEBUG (23): b24-23= 21403.
DEBUG (2): packet received from 6.
DEBUG (2): r62= 0.
DEBUG (2): ws1= 4.
DEBUG (2): ws2= 4.
DEBUG (2): wa2= 0.543900.
DEBUG (2): wb2= 0.195900.
DEBUG (2): temppkt->n1= 9.
DEBUG (2): temppkt->n2= 8.
DEBUG (2): temppkt->n3= 8.
DEBUG (2): temppkt->n4= 100.
DEBUG (2): temppkt->n5= 100.
DEBUG (2): temppkt->n6= 100.
DEBUG (2): m6-2= 0.543999.
DEBUG (2): n6-2= 0.195987.
DEBUG (2): a6-2= 35644.
DEBUG (2): b6-2= 12838.
DEBUG (1): packet received from 4.
DEBUG (1): r341= 0.
DEBUG (1): r31= 0.
DEBUG (1): r41= 0.
DEBUG (1): s1[0]= 0.000000.
DEBUG (1): s1[1]= 1.000000.
DEBUG (1): s1[2]= 0.000000.
DEBUG (1): s1[3]= 1.000000.
DEBUG (1): ws1= 3.
DEBUG (1): ws2= 4.
DEBUG (1): wa2= 0.093900.
DEBUG (1): wb2= 0.811900.
DEBUG (1): temppkt->n1= 6.
DEBUG (1): temppkt->n2= 9.
DEBUG (1): temppkt->n3= 5.
DEBUG (1): temppkt->n4= 100.
DEBUG (1): temppkt->n5= 100.
DEBUG (1): temppkt->n6= 100.
DEBUG (1): m4-1= 0.093996.
DEBUG (1): n4-1= 0.811994.
DEBUG (1): a4-1= 6153.
DEBUG (1): b4-1= 53207.
DEBUG (10): packet received from 11.
DEBUG (10): r112310= 0.
DEBUG (10): r1110= 0.
DEBUG (10): r2310= 0.
DEBUG (10): s10[0]= 0.000000.
DEBUG (10): s10[1]= 1.000000.
DEBUG (10): s10[2]= 0.000000.
DEBUG (10): s10[3]= 0.485700.
DEBUG (10): ws1= 4.
DEBUG (10): ws2= 4.
DEBUG (10): wa2= 0.506800.
DEBUG (10): wb2= 0.895800.
DEBUG (10): temppkt->n1= 9.
DEBUG (10): temppkt->n2= 9.
DEBUG (10): temppkt->n3= 2.
DEBUG (10): temppkt->n4= 100.
DEBUG (10): temppkt->n5= 100.
DEBUG (10): temppkt->n6= 100.
DEBUG (10): m11-10= 0.506889.
DEBUG (10): n11-10= 0.895888.
DEBUG (10): a11-10= 33213.
DEBUG (10): b11-10= 58706.
DEBUG (7): packet received from 10.
DEBUG (7): r10227= 0.
DEBUG (7): r107= 0.
DEBUG (7): r227= 0.
DEBUG (7): s7[0]= 0.000000.
DEBUG (7): s7[1]= 1.000000.
DEBUG (7): s7[2]= 0.000000.
DEBUG (7): s7[3]= 1.000000.
DEBUG (7): ws1= 4.
DEBUG (7): ws2= 4.
DEBUG (7): wa2= 0.506700.
DEBUG (7): wb2= 0.895700.
DEBUG (7): temppkt->n1= 9.
DEBUG (7): temppkt->n2= 9.
DEBUG (7): temppkt->n3= 2.
DEBUG (7): temppkt->n4= 100.
DEBUG (7): temppkt->n5= 100.
DEBUG (7): temppkt->n6= 100.
DEBUG (7): m10-7= 0.506798.
DEBUG (7): n10-7= 0.895796.
DEBUG (7): a10-7= 33206.
DEBUG (7): b10-7= 58699.
DEBUG (50): packet received from 2.
DEBUG (50): sourceid= 48.
DEBUG (50): r1250= 0.
DEBUG (50): r150= 0.
DEBUG (50): r250= 0.
DEBUG (50): s50[0]= 0.000000.
DEBUG (50): s50[1]= 1.000000.
DEBUG (50): s50[2]= 0.000000.
DEBUG (50): s50[3]= 1.000000.
DEBUG (50): a1= 35644.
DEBUG (50): b1= 12838.
DEBUG (50): btrpkt->n1= 9.
DEBUG (50): btrpkt->n2= 8.
DEBUG (50): btrpkt->n3= 8.
DEBUG (50): btrpkt->n4= 100.
DEBUG (50): btrpkt->n5= 100.
DEBUG (50): btrpkt->n6= 100.
DEBUG (50): ws1= 4.
DEBUG (50): ws2= 4.
DEBUG (50): wa2= 0.543800.
DEBUG (50): wb2= 0.195800.
DEBUG (50): btrpkt->n1= 9.
DEBUG (50): btrpkt->n2= 8.
DEBUG (50): btrpkt->n3= 8.
DEBUG (50): btrpkt->n4= 100.
DEBUG (50): btrpkt->n5= 100.
DEBUG (50): btrpkt->n6= 100.
DEBUG (50): m= 0.543893.
DEBUG (50): n= 0.195895.
DEBUG (50): a2= 35637.
DEBUG (50): b2= 12831.
DEBUG (22): packet received from 23.
DEBUG (22): r233322= 0.
DEBUG (22): r2322= 0.
DEBUG (22): r3322= 0.
DEBUG (22): s22[0]= 0.485700.
DEBUG (22): s22[1]= 1.000000.
DEBUG (22): s22[2]= 0.000000.
DEBUG (22): s22[3]= 0.561000.
DEBUG (22): ws1= 4.
DEBUG (22): ws2= 4.
DEBUG (22): temppkt3= 3.
DEBUG (22): wa1= 750.
DEBUG (22): wb1= 2650.
DEBUG (22): wa2= 0.075000.
DEBUG (22): wb2= 0.265000.
DEBUG (22): temppkt->n1= 9.
DEBUG (22): temppkt->n2= 9.
DEBUG (22): temppkt->n3= 3.
DEBUG (22): temppkt->n4= 100.
DEBUG (22): temppkt->n5= 100.
DEBUG (22): temppkt->n6= 100.
DEBUG (22): m23-22= 0.307511.
DEBUG (22): n23-22= 0.326589.
DEBUG (22): a23-22= 4915.
DEBUG (22): b23-22= 17366.
DEBUG (10): packet received from 23.
DEBUG (10): r112310= 0.
DEBUG (10): r1110= 0.
DEBUG (10): r2310= 0.
DEBUG (10): s10[0]= 0.000000.
DEBUG (10): s10[1]= 1.000000.
DEBUG (10): s10[2]= 0.000000.
DEBUG (10): s10[3]= 0.485700.
DEBUG (10): ws1= 4.
DEBUG (10): ws2= 4.
DEBUG (10): wa2= 0.289400.
DEBUG (10): wb2= 0.307500.
DEBUG (10): temppkt->n1= 9.
DEBUG (10): temppkt->n2= 9.
DEBUG (10): temppkt->n3= 100.
DEBUG (10): temppkt->n4= 100.
DEBUG (10): temppkt->n5= 100.
DEBUG (10): temppkt->n6= 100.
DEBUG (10): m23-10= 0.289494.
DEBUG (10): n23-10= 0.307511.
DEBUG (10): a23-10= 18965.
DEBUG (10): b23-10= 20152.
DEBUG (50): packet received from 1.
DEBUG (50): sourceid= 27.
DEBUG (50): r1250= 0.
DEBUG (50): r150= 0.
DEBUG (50): r250= 0.
DEBUG (50): s50[0]= 0.000000.
DEBUG (50): s50[1]= 1.000000.
DEBUG (50): s50[2]= 0.000000.
DEBUG (50): s50[3]= 1.000000.
DEBUG (50): a1= 6153.
DEBUG (50): b1= 53207.
DEBUG (50): btrpkt->n1= 6.
DEBUG (50): btrpkt->n2= 9.
DEBUG (50): btrpkt->n3= 5.
DEBUG (50): btrpkt->n4= 100.
DEBUG (50): btrpkt->n5= 100.
DEBUG (50): btrpkt->n6= 100.
DEBUG (50): ws1= 3.
DEBUG (50): ws2= 4.
DEBUG (50): wa2= 0.093800.
DEBUG (50): wb2= 0.811800.
DEBUG (50): btrpkt->n1= 6.
DEBUG (50): btrpkt->n2= 9.
DEBUG (50): btrpkt->n3= 5.
DEBUG (50): btrpkt->n4= 100.
DEBUG (50): btrpkt->n5= 100.
DEBUG (50): btrpkt->n6= 100.
DEBUG (50): m= 0.093889.
DEBUG (50): n= 0.811887.
DEBUG (50): a2= 6147.
DEBUG (50): b2= 53201.
DEBUG (7): packet received from 22.
DEBUG (7): r10227= 0.
DEBUG (7): r107= 0.
DEBUG (7): r227= 0.
DEBUG (7): s7[0]= 0.000000.
DEBUG (7): s7[1]= 1.000000.
DEBUG (7): s7[2]= 0.000000.
DEBUG (7): s7[3]= 1.000000.
DEBUG (7): ws1= 3.
DEBUG (7): ws2= 4.
DEBUG (7): wa2= 0.074900.
DEBUG (7): wb2= 0.264900.
DEBUG (7): temppkt->n1= 9.
DEBUG (7): temppkt->n2= 9.
DEBUG (7): temppkt->n3= 3.
DEBUG (7): temppkt->n4= 100.
DEBUG (7): temppkt->n5= 100.
DEBUG (7): temppkt->n6= 100.
DEBUG (7): m22-7= 0.074998.
DEBUG (7): n22-7= 0.264988.
DEBUG (7): a22-7= 4908.
DEBUG (7): b22-7= 17360.
DEBUG (3): packet received from 7.
DEBUG (3): r73= 0.
DEBUG (3): ws1= 3.
DEBUG (3): ws2= 4.
DEBUG (3): wa2= 0.074800.
DEBUG (3): wb2= 0.179000.
DEBUG (3): temppkt->n1= 9.
DEBUG (3): temppkt->n2= 9.
DEBUG (3): temppkt->n3= 3.
DEBUG (3): temppkt->n4= 100.
DEBUG (3): temppkt->n5= 100.
DEBUG (3): temppkt->n6= 100.
DEBUG (3): m7-3= 0.074891.
DEBUG (3): n7-3= 0.179090.
DEBUG (3): a7-3= 4902.
DEBUG (3): b7-3= 11730.
DEBUG (4): packet received from 7.
DEBUG (4): r5784= 0.
DEBUG (4): r54= 0.
DEBUG (4): r74= 0.
DEBUG (4): r84= 0.
DEBUG (4): s4[0]= 0.000000.
DEBUG (4): s4[1]= 1.000000.
DEBUG (4): s4[2]= 0.548400.
DEBUG (4): s4[3]= 1.000000.
DEBUG (4): s4[4]= 0.000000.
DEBUG (4): s4[5]= 0.409100.
DEBUG (4): ws1= 4.
DEBUG (4): ws2= 4.
DEBUG (4): wa2= 0.179000.
DEBUG (4): wb2= 0.264800.
DEBUG (4): temppkt->n1= 9.
DEBUG (4): temppkt->n2= 9.
DEBUG (4): temppkt->n3= 3.
DEBUG (4): temppkt->n4= 100.
DEBUG (4): temppkt->n5= 100.
DEBUG (4): temppkt->n6= 100.
DEBUG (4): m7-4= 0.179090.
DEBUG (4): n7-4= 0.264897.
DEBUG (4): a7-4= 11730.
DEBUG (4): b7-4= 17353.
DEBUG (7): packet received from 10.
DEBUG (7): r10227= 0.
DEBUG (7): r107= 0.
DEBUG (7): r227= 0.
DEBUG (7): s7[0]= 0.000000.
DEBUG (7): s7[1]= 1.000000.
DEBUG (7): s7[2]= 0.000000.
DEBUG (7): s7[3]= 1.000000.
DEBUG (7): ws1= 4.
DEBUG (7): ws2= 4.
DEBUG (7): wa2= 0.289300.
DEBUG (7): wb2= 0.307400.
DEBUG (7): temppkt->n1= 9.
DEBUG (7): temppkt->n2= 9.
DEBUG (7): temppkt->n3= 100.
DEBUG (7): temppkt->n4= 100.
DEBUG (7): temppkt->n5= 100.
DEBUG (7): temppkt->n6= 100.
DEBUG (7): m10-7= 0.289387.
DEBUG (7): n10-7= 0.307500.
DEBUG (7): a10-7= 18959.
DEBUG (7): b10-7= 20145.
DEBUG (1): packet received from 3.
DEBUG (1): r341= 0.
DEBUG (1): r31= 0.
DEBUG (1): r41= 0.
DEBUG (1): s1[0]= 0.000000.
DEBUG (1): s1[1]= 1.000000.
DEBUG (1): s1[2]= 0.000000.
DEBUG (1): s1[3]= 1.000000.
DEBUG (1): ws1= 3.
DEBUG (1): ws2= 4.
DEBUG (1): wa2= 0.074700.
DEBUG (1): wb2= 0.178900.
DEBUG (1): temppkt->n1= 9.
DEBUG (1): temppkt->n2= 9.
DEBUG (1): temppkt->n3= 3.
DEBUG (1): temppkt->n4= 100.
DEBUG (1): temppkt->n5= 100.
DEBUG (1): temppkt->n6= 100.
DEBUG (1): m3-1= 0.074800.
DEBUG (1): n3-1= 0.178988.
DEBUG (1): a3-1= 4895.
DEBUG (1): b3-1= 11724.
DEBUG (1): packet received from 4.
DEBUG (1): r341= 0.
DEBUG (1): r31= 0.
DEBUG (1): r41= 0.
DEBUG (1): s1[0]= 0.000000.
DEBUG (1): s1[1]= 1.000000.
DEBUG (1): s1[2]= 0.000000.
DEBUG (1): s1[3]= 1.000000.
DEBUG (1): ws1= 4.
DEBUG (1): ws2= 4.
DEBUG (1): wa2= 0.178900.
DEBUG (1): wb2= 0.264700.
DEBUG (1): temppkt->n1= 9.
DEBUG (1): temppkt->n2= 9.
DEBUG (1): temppkt->n3= 3.
DEBUG (1): temppkt->n4= 100.
DEBUG (1): temppkt->n5= 100.
DEBUG (1): temppkt->n6= 100.
DEBUG (1): m4-1= 0.178988.
DEBUG (1): n4-1= 0.264790.
DEBUG (1): a4-1= 11724.
DEBUG (1): b4-1= 17347.
DEBUG (50): packet received from 1.
DEBUG (50): sourceid= 49.
DEBUG (50): r1250= 0.
DEBUG (50): r150= 0.
DEBUG (50): r250= 0.
DEBUG (50): s50[0]= 0.000000.
DEBUG (50): s50[1]= 1.000000.
DEBUG (50): s50[2]= 0.000000.
DEBUG (50): s50[3]= 1.000000.
DEBUG (50): a1= 11724.
DEBUG (50): b1= 17347.
DEBUG (50): btrpkt->n1= 9.
DEBUG (50): btrpkt->n2= 9.
DEBUG (50): btrpkt->n3= 3.
DEBUG (50): btrpkt->n4= 100.
DEBUG (50): btrpkt->n5= 100.
DEBUG (50): btrpkt->n6= 100.
DEBUG (50): ws1= 4.
DEBUG (50): ws2= 4.
DEBUG (50): wa2= 0.178800.
DEBUG (50): wb2= 0.264600.
DEBUG (50): btrpkt->n1= 9.
DEBUG (50): btrpkt->n2= 9.
DEBUG (50): btrpkt->n3= 3.
DEBUG (50): btrpkt->n4= 100.
DEBUG (50): btrpkt->n5= 100.
DEBUG (50): btrpkt->n6= 100.
DEBUG (50): m= 0.178897.
DEBUG (50): n= 0.264698.
DEBUG (50): a2= 11717.
DEBUG (50): b2= 17340.
DEBUG (3): packet received from 7.
DEBUG (3): r73= 0.
DEBUG (3): ws1= 4.
DEBUG (3): ws2= 4.
DEBUG (3): temppkt3= 2.
DEBUG (3): wa1= 8920.
DEBUG (3): wb1= 9920.
DEBUG (3): wa2= 0.892000.
DEBUG (3): wb2= 0.992000.
DEBUG (3): temppkt->n1= 9.
DEBUG (3): temppkt->n2= 9.
DEBUG (3): temppkt->n3= 2.
DEBUG (3): temppkt->n4= 100.
DEBUG (3): temppkt->n5= 100.
DEBUG (3): temppkt->n6= 100.
DEBUG (3): m7-3= 0.289296.
DEBUG (3): n7-3= 0.299220.
DEBUG (3): a7-3= 58457.
DEBUG (3): b7-3= 65010.
DEBUG (4): packet received from 7.
DEBUG (4): r5784= 0.
DEBUG (4): r54= 0.
DEBUG (4): r74= 0.
DEBUG (4): r84= 0.
DEBUG (4): s4[0]= 0.000000.
DEBUG (4): s4[1]= 1.000000.
DEBUG (4): s4[2]= 0.548400.
DEBUG (4): s4[3]= 1.000000.
DEBUG (4): s4[4]= 0.000000.
DEBUG (4): s4[5]= 0.409100.
DEBUG (4): ws1= 4.
DEBUG (4): ws2= 4.
DEBUG (4): wa2= 0.299200.
DEBUG (4): wb2= 0.307300.
DEBUG (4): temppkt->n1= 9.
DEBUG (4): temppkt->n2= 9.
DEBUG (4): temppkt->n3= 100.
DEBUG (4): temppkt->n4= 100.
DEBUG (4): temppkt->n5= 100.
DEBUG (4): temppkt->n6= 100.
DEBUG (4): m7-4= 0.299220.
DEBUG (4): n7-4= 0.307393.
DEBUG (4): a7-4= 19608.
DEBUG (4): b7-4= 20138.
DEBUG (1): packet received from 4.
DEBUG (1): r341= 0.
DEBUG (1): r31= 0.
DEBUG (1): r41= 0.
DEBUG (1): s1[0]= 0.000000.
DEBUG (1): s1[1]= 1.000000.
DEBUG (1): s1[2]= 0.000000.
DEBUG (1): s1[3]= 1.000000.
DEBUG (1): ws1= 4.
DEBUG (1): ws2= 4.
DEBUG (1): wa2= 0.299100.
DEBUG (1): wb2= 0.307200.
DEBUG (1): temppkt->n1= 9.
DEBUG (1): temppkt->n2= 9.
DEBUG (1): temppkt->n3= 100.
DEBUG (1): temppkt->n4= 100.
DEBUG (1): temppkt->n5= 100.
DEBUG (1): temppkt->n6= 100.
DEBUG (1): m4-1= 0.299199.
DEBUG (1): n4-1= 0.307286.
DEBUG (1): a4-1= 19601.
DEBUG (1): b4-1= 20132.
DEBUG (1): packet received from 3.
DEBUG (1): r341= 0.
DEBUG (1): r31= 0.
DEBUG (1): r41= 0.
DEBUG (1): s1[0]= 0.000000.
DEBUG (1): s1[1]= 1.000000.
DEBUG (1): s1[2]= 0.000000.
DEBUG (1): s1[3]= 1.000000.
DEBUG (1): ws1= 4.
DEBUG (1): ws2= 4.
DEBUG (1): wa2= 0.891900.
DEBUG (1): wb2= 0.991900.
DEBUG (1): temppkt->n1= 9.
DEBUG (1): temppkt->n2= 9.
DEBUG (1): temppkt->n3= 2.
DEBUG (1): temppkt->n4= 100.
DEBUG (1): temppkt->n5= 100.
DEBUG (1): temppkt->n6= 100.
DEBUG (1): m3-1= 0.891997.
DEBUG (1): n3-1= 0.991989.
DEBUG (1): a3-1= 58450.
DEBUG (1): b3-1= 65004.
DEBUG (50): packet received from 1.
DEBUG (50): sourceid= 49.
DEBUG (50): r1250= 0.
DEBUG (50): r150= 0.
DEBUG (50): r250= 0.
DEBUG (50): s50[0]= 0.000000.
DEBUG (50): s50[1]= 1.000000.
DEBUG (50): s50[2]= 0.000000.
DEBUG (50): s50[3]= 1.000000.
DEBUG (50): a1= 58450.
DEBUG (50): b1= 65004.
DEBUG (50): btrpkt->n1= 9.
DEBUG (50): btrpkt->n2= 9.
DEBUG (50): btrpkt->n3= 2.
DEBUG (50): btrpkt->n4= 100.
DEBUG (50): btrpkt->n5= 100.
DEBUG (50): btrpkt->n6= 100.
DEBUG (50): ws1= 4.
DEBUG (50): ws2= 4.
DEBUG (50): wa2= 0.891800.
DEBUG (50): wb2= 0.991800.
DEBUG (50): btrpkt->n1= 9.
DEBUG (50): btrpkt->n2= 9.
DEBUG (50): btrpkt->n3= 2.
DEBUG (50): btrpkt->n4= 100.
DEBUG (50): btrpkt->n5= 100.
DEBUG (50): btrpkt->n6= 100.
DEBUG (50): m= 0.891890.
DEBUG (50): n= 0.991897.
DEBUG (50): a2= 58444.
DEBUG (50): b2= 64997.
DEBUG (1): count is 4.
DEBUG (1): **************************.
DEBUG (2): count is 4.
DEBUG (2): **************************.
DEBUG (3): count is 4.
DEBUG (3): **************************.
DEBUG (4): count is 4.
DEBUG (4): **************************.
DEBUG (5): count is 4.
DEBUG (5): **************************.
DEBUG (6): count is 4.
DEBUG (6): **************************.
DEBUG (7): count is 4.
DEBUG (7): **************************.
DEBUG (8): count is 4.
DEBUG (8): **************************.
DEBUG (9): count is 4.
DEBUG (9): **************************.
DEBUG (10): count is 4.
DEBUG (10): **************************.
DEBUG (11): count is 4.
DEBUG (11): **************************.
DEBUG (12): count is 4.
DEBUG (12): **************************.
DEBUG (13): count is 4.
DEBUG (13): **************************.
DEBUG (14): count is 4.
DEBUG (14): **************************.
DEBUG (15): count is 4.
DEBUG (15): **************************.
DEBUG (16): count is 4.
DEBUG (16): **************************.
DEBUG (17): count is 4.
DEBUG (17): **************************.
DEBUG (18): count is 4.
DEBUG (18): **************************.
DEBUG (19): count is 4.
DEBUG (19): **************************.
DEBUG (20): count is 4.
DEBUG (20): **************************.
DEBUG (21): count is 4.
DEBUG (21): **************************.
DEBUG (22): count is 4.
DEBUG (22): **************************.
DEBUG (23): count is 4.
DEBUG (23): **************************.
DEBUG (24): count is 4.
DEBUG (24): **************************.
DEBUG (25): count is 4.
DEBUG (25): **************************.
DEBUG (26): count is 4.
DEBUG (26): **************************.
DEBUG (27): count is 4.
DEBUG (27): **************************.
DEBUG (28): count is 4.
DEBUG (28): **************************.
DEBUG (29): count is 4.
DEBUG (29): **************************.
DEBUG (30): count is 4.
DEBUG (30): **************************.
DEBUG (31): count is 4.
DEBUG (31): **************************.
DEBUG (32): count is 4.
DEBUG (32): **************************.
DEBUG (33): count is 4.
DEBUG (33): **************************.
DEBUG (34): count is 4.
DEBUG (34): **************************.
DEBUG (35): count is 4.
DEBUG (35): **************************.
DEBUG (36): count is 4.
DEBUG (36): **************************.
DEBUG (37): count is 4.
DEBUG (37): **************************.
DEBUG (38): count is 4.
DEBUG (38): **************************.
DEBUG (39): count is 4.
DEBUG (39): **************************.
DEBUG (40): count is 4.
DEBUG (40): **************************.
DEBUG (41): count is 4.
DEBUG (41): **************************.
DEBUG (42): count is 4.
DEBUG (42): **************************.
DEBUG (43): count is 4.
DEBUG (43): **************************.
DEBUG (44): count is 4.
DEBUG (44): **************************.
DEBUG (45): count is 4.
DEBUG (45): **************************.
DEBUG (46): count is 4.
DEBUG (46): **************************.
DEBUG (47): count is 4.
DEBUG (47): **************************.
DEBUG (48): count is 4.
DEBUG (48): **************************.
DEBUG (49): count is 4.
DEBUG (49): **************************.
DEBUG (50): count is 4.
DEBUG (50): **************************.
DEBUG (35): packet received from 36.
DEBUG (35): r3635= 0.
DEBUG (35): ws1= 4.
DEBUG (35): ws2= 4.
DEBUG (35): temppkt1= 8.
DEBUG (35): wa1= 2180.
DEBUG (35): wb1= 4500.
DEBUG (35): wa2= 0.218000.
DEBUG (35): wb2= 0.450000.
DEBUG (35): a1= 0.
DEBUG (35): temppkt->n1= 8.
DEBUG (35): temppkt->n2= 100.
DEBUG (35): temppkt->n3= 100.
DEBUG (35): temppkt->n4= 100.
DEBUG (35): temppkt->n5= 100.
DEBUG (35): temppkt->n6= 100.
DEBUG (35): m36-35= 0.821897.
DEBUG (35): n36-35= 0.845090.
DEBUG (35): a36-35= 14286.
DEBUG (35): b36-35= 29490.
DEBUG (39): packet received from 40.
DEBUG (39): r404939= 0.
DEBUG (39): r4039= 0.
DEBUG (39): r4939= 0.
DEBUG (39): s39[0]= 0.000000.
DEBUG (39): s39[1]= 1.000000.
DEBUG (39): s39[2]= 0.000000.
DEBUG (39): s39[3]= 0.428600.
DEBUG (39): ws1= 4.
DEBUG (39): ws2= 4.
DEBUG (39): temppkt1= 8.
DEBUG (39): wa1= 8470.
DEBUG (39): wb1= 9300.
DEBUG (39): wa2= 0.847000.
DEBUG (39): wb2= 0.930000.
DEBUG (39): a1= 0.
DEBUG (39): temppkt->n1= 8.
DEBUG (39): temppkt->n2= 100.
DEBUG (39): temppkt->n3= 100.
DEBUG (39): temppkt->n4= 100.
DEBUG (39): temppkt->n5= 100.
DEBUG (39): temppkt->n6= 100.
DEBUG (39): m40-39= 0.884794.
DEBUG (39): n40-39= 0.893095.
DEBUG (39): a40-39= 55508.
DEBUG (39): b40-39= 60947.
DEBUG (18): packet received from 19.
DEBUG (18): r1918= 0.
DEBUG (18): ws1= 4.
DEBUG (18): ws2= 4.
DEBUG (18): temppkt1= 9.
DEBUG (18): wa1= 7210.
DEBUG (18): wb1= 8310.
DEBUG (18): wa2= 0.721000.
DEBUG (18): wb2= 0.831000.
DEBUG (18): a1= 0.
DEBUG (18): temppkt->n1= 9.
DEBUG (18): temppkt->n2= 100.
DEBUG (18): temppkt->n3= 100.
DEBUG (18): temppkt->n4= 100.
DEBUG (18): temppkt->n5= 100.
DEBUG (18): temppkt->n6= 100.
DEBUG (18): m19-18= 0.972198.
DEBUG (18): n19-18= 0.983200.
DEBUG (18): a19-18= 47250.
DEBUG (18): b19-18= 54459.
DEBUG (24): packet received from 25.
DEBUG (24): r253524= 0.
DEBUG (24): r2524= 0.
DEBUG (24): r3524= 0.
DEBUG (24): s24[0]= 0.511600.
DEBUG (24): s24[1]= 1.000000.
DEBUG (24): s24[2]= 0.000000.
DEBUG (24): s24[3]= 0.448300.
DEBUG (24): ws1= 4.
DEBUG (24): ws2= 4.
DEBUG (24): temppkt1= 6.
DEBUG (24): wa1= 4310.
DEBUG (24): wb1= 5440.
DEBUG (24): wa2= 0.431000.
DEBUG (24): wb2= 0.544000.
DEBUG (24): a1= 0.
DEBUG (24): temppkt->n1= 6.
DEBUG (24): temppkt->n2= 100.
DEBUG (24): temppkt->n3= 100.
DEBUG (24): temppkt->n4= 100.
DEBUG (24): temppkt->n5= 100.
DEBUG (24): temppkt->n6= 100.
DEBUG (24): m25-24= 0.643162.
DEBUG (24): n25-24= 0.654490.
DEBUG (24): a25-24= 28245.
DEBUG (24): b25-24= 35651.
DEBUG (12): packet received from 25.
DEBUG (12): r132512= 0.
DEBUG (12): r1312= 0.
DEBUG (12): r2512= 0.
DEBUG (12): s12[0]= 0.000000.
DEBUG (12): s12[1]= 1.000000.
DEBUG (12): s12[2]= 0.000000.
DEBUG (12): s12[3]= 0.511600.
DEBUG (12): ws1= 4.
DEBUG (12): ws2= 4.
DEBUG (12): temppkt1= 6.
DEBUG (12): wa1= 3120.
DEBUG (12): wb1= 4310.
DEBUG (12): wa2= 0.312000.
DEBUG (12): wb2= 0.431000.
DEBUG (12): a1= 0.
DEBUG (12): temppkt->n1= 6.
DEBUG (12): temppkt->n2= 100.
DEBUG (12): temppkt->n3= 100.
DEBUG (12): temppkt->n4= 100.
DEBUG (12): temppkt->n5= 100.
DEBUG (12): temppkt->n6= 100.
DEBUG (12): m25-12= 0.631296.
DEBUG (12): n25-12= 0.643162.
DEBUG (12): a25-12= 20446.
DEBUG (12): b25-12= 28245.
DEBUG (10): packet received from 11.
DEBUG (10): r112310= 0.
DEBUG (10): r1110= 0.
DEBUG (10): r2310= 0.
DEBUG (10): s10[0]= 0.000000.
DEBUG (10): s10[1]= 1.000000.
DEBUG (10): s10[2]= 0.000000.
DEBUG (10): s10[3]= 0.485700.
DEBUG (10): ws1= 4.
DEBUG (10): ws2= 4.
DEBUG (10): wa2= 0.689700.
DEBUG (10): wb2= 0.732300.
DEBUG (10): temppkt->n1= 100.
DEBUG (10): temppkt->n2= 100.
DEBUG (10): temppkt->n3= 100.
DEBUG (10): temppkt->n4= 100.
DEBUG (10): temppkt->n5= 100.
DEBUG (10): temppkt->n6= 100.
DEBUG (10): m11-10= 0.689799.
DEBUG (10): n11-10= 0.732387.
DEBUG (10): a11-10= 45199.
DEBUG (10): b11-10= 47991.
DEBUG (8): packet received from 21.
DEBUG (8): r218= 0.
DEBUG (8): ws1= 4.
DEBUG (8): ws2= 4.
DEBUG (8): temppkt1= 5.
DEBUG (8): wa1= 2680.
DEBUG (8): wb1= 4920.
DEBUG (8): wa2= 0.268000.
DEBUG (8): wb2= 0.492000.
DEBUG (8): a1= 0.
DEBUG (8): temppkt->n1= 5.
DEBUG (8): temppkt->n2= 100.
DEBUG (8): temppkt->n3= 100.
DEBUG (8): temppkt->n4= 100.
DEBUG (8): temppkt->n5= 100.
DEBUG (8): temppkt->n6= 100.
DEBUG (8): m21-8= 0.526894.
DEBUG (8): n21-8= 0.549294.
DEBUG (8): a21-8= 17563.
DEBUG (8): b21-8= 32243.
DEBUG (13): packet received from 14.
DEBUG (13): r1413= 0.
DEBUG (13): ws1= 4.
DEBUG (13): ws2= 4.
DEBUG (13): temppkt1= 8.
DEBUG (13): wa1= 3670.
DEBUG (13): wb1= 9310.
DEBUG (13): wa2= 0.367000.
DEBUG (13): wb2= 0.931000.
DEBUG (13): a1= 0.
DEBUG (13): temppkt->n1= 8.
DEBUG (13): temppkt->n2= 100.
DEBUG (13): temppkt->n3= 100.
DEBUG (13): temppkt->n4= 100.
DEBUG (13): temppkt->n5= 100.
DEBUG (13): temppkt->n6= 100.
DEBUG (13): m14-13= 0.836789.
DEBUG (13): n14-13= 0.893187.
DEBUG (13): a14-13= 24051.
DEBUG (13): b14-13= 61013.
DEBUG (15): packet received from 16.
DEBUG (15): r1615= 0.
DEBUG (15): ws1= 4.
DEBUG (15): ws2= 4.
DEBUG (15): temppkt1= 9.
DEBUG (15): wa1= 2610.
DEBUG (15): wb1= 5930.
DEBUG (15): wa2= 0.261000.
DEBUG (15): wb2= 0.593000.
DEBUG (15): a1= 0.
DEBUG (15): temppkt->n1= 9.
DEBUG (15): temppkt->n2= 100.
DEBUG (15): temppkt->n3= 100.
DEBUG (15): temppkt->n4= 100.
DEBUG (15): temppkt->n5= 100.
DEBUG (15): temppkt->n6= 100.
DEBUG (15): m16-15= 0.926192.
DEBUG (15): n16-15= 0.959396.
DEBUG (15): a16-15= 17104.
DEBUG (15): b16-15= 38862.
DEBUG (46): packet received from 47.
DEBUG (46): r4746= 0.
DEBUG (46): ws1= 4.
DEBUG (46): ws2= 4.
DEBUG (46): temppkt1= 9.
DEBUG (46): wa1= 7340.
DEBUG (46): wb1= 8500.
DEBUG (46): wa2= 0.734000.
DEBUG (46): wb2= 0.850000.
DEBUG (46): a1= 0.
DEBUG (46): temppkt->n1= 9.
DEBUG (46): temppkt->n2= 100.
DEBUG (46): temppkt->n3= 100.
DEBUG (46): temppkt->n4= 100.
DEBUG (46): temppkt->n5= 100.
DEBUG (46): temppkt->n6= 100.
DEBUG (46): m47-46= 0.973495.
DEBUG (46): n47-46= 0.985092.
DEBUG (46): a47-46= 48102.
DEBUG (46): b47-46= 55704.
DEBUG (3): packet received from 7.
DEBUG (3): r73= 0.
DEBUG (3): ws1= 4.
DEBUG (3): ws2= 4.
DEBUG (3): temppkt1= 4.
DEBUG (3): wa1= 2410.
DEBUG (3): wb1= 7230.
DEBUG (3): wa2= 0.241000.
DEBUG (3): wb2= 0.723000.
DEBUG (3): a1= 0.
DEBUG (3): temppkt->n1= 4.
DEBUG (3): temppkt->n2= 100.
DEBUG (3): temppkt->n3= 100.
DEBUG (3): temppkt->n4= 100.
DEBUG (3): temppkt->n5= 100.
DEBUG (3): temppkt->n6= 100.
DEBUG (3): m7-3= 0.424186.
DEBUG (3): n7-3= 0.472335.
DEBUG (3): a7-3= 15793.
DEBUG (3): b7-3= 47381.
DEBUG (41): packet received from 42.
DEBUG (41): r4241= 0.
DEBUG (41): ws1= 4.
DEBUG (41): ws2= 4.
DEBUG (41): wa2= 0.897200.
DEBUG (41): wb2= 0.905500.
DEBUG (41): temppkt->n1= 100.
DEBUG (41): temppkt->n2= 100.
DEBUG (41): temppkt->n3= 100.
DEBUG (41): temppkt->n4= 100.
DEBUG (41): temppkt->n5= 100.
DEBUG (41): temppkt->n6= 100.
DEBUG (41): m42-41= 0.897292.
DEBUG (41): n42-41= 0.905592.
DEBUG (41): a42-41= 58798.
DEBUG (41): b42-41= 59341.
DEBUG (5): packet received from 8.
DEBUG (5): r895= 0.
DEBUG (5): r85= 0.
DEBUG (5): r95= 0.
DEBUG (5): s5[0]= 0.409100.
DEBUG (5): s5[1]= 1.000000.
DEBUG (5): s5[2]= 0.000000.
DEBUG (5): s5[3]= 0.231900.
DEBUG (5): ws1= 4.
DEBUG (5): ws2= 4.
DEBUG (5): wa2= 0.359600.
DEBUG (5): wb2= 0.491900.
DEBUG (5): temppkt->n1= 5.
DEBUG (5): temppkt->n2= 100.
DEBUG (5): temppkt->n3= 100.
DEBUG (5): temppkt->n4= 100.
DEBUG (5): temppkt->n5= 100.
DEBUG (5): temppkt->n6= 100.
DEBUG (5): m8-5= 0.359634.
DEBUG (5): n8-5= 0.491997.
DEBUG (5): a8-5= 23566.
DEBUG (5): b8-5= 32236.
DEBUG (23): packet received from 24.
DEBUG (23): r2423= 0.
DEBUG (23): ws1= 4.
DEBUG (23): ws2= 4.
DEBUG (23): wa2= 0.430900.
DEBUG (23): wb2= 0.543900.
DEBUG (23): temppkt->n1= 6.
DEBUG (23): temppkt->n2= 100.
DEBUG (23): temppkt->n3= 100.
DEBUG (23): temppkt->n4= 100.
DEBUG (23): temppkt->n5= 100.
DEBUG (23): temppkt->n6= 100.
DEBUG (23): m24-23= 0.430991.
DEBUG (23): n24-23= 0.543999.
DEBUG (23): a24-23= 28239.
DEBUG (23): b24-23= 35644.
DEBUG (28): packet received from 29.
DEBUG (28): r293928= 0.
DEBUG (28): r2928= 0.
DEBUG (28): r3928= 0.
DEBUG (28): s28[0]= 0.541700.
DEBUG (28): s28[1]= 1.000000.
DEBUG (28): s28[2]= 0.000000.
DEBUG (28): s28[3]= 0.464300.
DEBUG (28): ws1= 4.
DEBUG (28): ws2= 4.
DEBUG (28): temppkt1= 7.
DEBUG (28): wa1= 2370.
DEBUG (28): wb1= 2900.
DEBUG (28): temppkt2= 2.
DEBUG (28): wa1= 3700.
DEBUG (28): wb1= 9000.
DEBUG (28): wa2= 0.370000.
DEBUG (28): wb2= 0.900000.
DEBUG (28): temppkt->n1= 7.
DEBUG (28): temppkt->n2= 2.
DEBUG (28): temppkt->n3= 100.
DEBUG (28): temppkt->n4= 100.
DEBUG (28): temppkt->n5= 100.
DEBUG (28): temppkt->n6= 100.
DEBUG (28): m29-28= 0.723777.
DEBUG (28): n29-28= 0.729091.
DEBUG (28): a29-28= 24247.
DEBUG (28): b29-28= 58981.
DEBUG (45): packet received from 46.
DEBUG (45): r4645= 0.
DEBUG (45): ws1= 4.
DEBUG (45): ws2= 4.
DEBUG (45): wa2= 0.788100.
DEBUG (45): wb2= 0.849900.
DEBUG (45): temppkt->n1= 9.
DEBUG (45): temppkt->n2= 100.
DEBUG (45): temppkt->n3= 100.
DEBUG (45): temppkt->n4= 100.
DEBUG (45): temppkt->n5= 100.
DEBUG (45): temppkt->n6= 100.
DEBUG (45): m46-45= 0.788126.
DEBUG (45): n46-45= 0.849989.
DEBUG (45): a46-45= 51648.
DEBUG (45): b46-45= 55698.
DEBUG (7): packet received from 22.
DEBUG (7): r10227= 0.
DEBUG (7): r107= 0.
DEBUG (7): r227= 0.
DEBUG (7): s7[0]= 0.000000.
DEBUG (7): s7[1]= 1.000000.
DEBUG (7): s7[2]= 0.000000.
DEBUG (7): s7[3]= 1.000000.
DEBUG (7): ws1= 4.
DEBUG (7): ws2= 4.
DEBUG (7): temppkt1= 5.
DEBUG (7): wa1= 4920.
DEBUG (7): wb1= 8320.
DEBUG (7): wa2= 0.492000.
DEBUG (7): wb2= 0.832000.
DEBUG (7): a1= 0.
DEBUG (7): temppkt->n1= 5.
DEBUG (7): temppkt->n2= 100.
DEBUG (7): temppkt->n3= 100.
DEBUG (7): temppkt->n4= 100.
DEBUG (7): temppkt->n5= 100.
DEBUG (7): temppkt->n6= 100.
DEBUG (7): m22-7= 0.549294.
DEBUG (7): n22-7= 0.583291.
DEBUG (7): a22-7= 32243.
DEBUG (7): b22-7= 54525.
DEBUG (40): packet received from 41.
DEBUG (40): r4140= 0.
DEBUG (40): ws1= 4.
DEBUG (40): ws2= 4.
DEBUG (40): temppkt1= 9.
DEBUG (40): wa1= 110.
DEBUG (40): wb1= 540.
DEBUG (40): temppkt2= 0.
DEBUG (40): wa1= 1100.
DEBUG (40): wb1= 5400.
DEBUG (40): wa2= 0.110000.
DEBUG (40): wb2= 0.540000.
DEBUG (40): temppkt->n1= 9.
DEBUG (40): temppkt->n2= 0.
DEBUG (40): temppkt->n3= 100.
DEBUG (40): temppkt->n4= 100.
DEBUG (40): temppkt->n5= 100.
DEBUG (40): temppkt->n6= 100.
DEBUG (40): m41-40= 0.901125.
DEBUG (40): n41-40= 0.905486.
DEBUG (40): a41-40= 7208.
DEBUG (40): b41-40= 35388.
DEBUG (11): packet received from 12.
DEBUG (11): r1211= 0.
DEBUG (11): ws1= 4.
DEBUG (11): ws2= 4.
DEBUG (11): wa2= 0.311900.
DEBUG (11): wb2= 0.430900.
DEBUG (11): temppkt->n1= 6.
DEBUG (11): temppkt->n2= 100.
DEBUG (11): temppkt->n3= 100.
DEBUG (11): temppkt->n4= 100.
DEBUG (11): temppkt->n5= 100.
DEBUG (11): temppkt->n6= 100.
DEBUG (11): m12-11= 0.311986.
DEBUG (11): n12-11= 0.430991.
DEBUG (11): a12-11= 20440.
DEBUG (11): b12-11= 28239.
DEBUG (25): packet received from 26.
DEBUG (25): r2625= 0.
DEBUG (25): ws1= 4.
DEBUG (25): ws2= 4.
DEBUG (25): temppkt1= 6.
DEBUG (25): wa1= 5440.
DEBUG (25): wb1= 8260.
DEBUG (25): wa2= 0.544000.
DEBUG (25): wb2= 0.826000.
DEBUG (25): a1= 0.
DEBUG (25): temppkt->n1= 6.
DEBUG (25): temppkt->n2= 100.
DEBUG (25): temppkt->n3= 100.
DEBUG (25): temppkt->n4= 100.
DEBUG (25): temppkt->n5= 100.
DEBUG (25): temppkt->n6= 100.
DEBUG (25): m26-25= 0.654490.
DEBUG (25): n26-25= 0.682689.
DEBUG (25): a26-25= 35651.
DEBUG (25): b26-25= 54131.
DEBUG (37): packet received from 38.
DEBUG (37): r3837= 0.
DEBUG (37): ws1= 4.
DEBUG (37): ws2= 4.
DEBUG (37): temppkt1= 8.
DEBUG (37): wa1= 6070.
DEBUG (37): wb1= 7310.
DEBUG (37): wa2= 0.607000.
DEBUG (37): wb2= 0.731000.
DEBUG (37): a1= 0.
DEBUG (37): temppkt->n1= 8.
DEBUG (37): temppkt->n2= 100.
DEBUG (37): temppkt->n3= 100.
DEBUG (37): temppkt->n4= 100.
DEBUG (37): temppkt->n5= 100.
DEBUG (37): temppkt->n6= 100.
DEBUG (37): m38-37= 0.860792.
DEBUG (37): n38-37= 0.873198.
DEBUG (37): a38-37= 39779.
DEBUG (37): b38-37= 47906.
DEBUG (36): packet received from 48.
DEBUG (36): r374836= 0.
DEBUG (36): r3736= 0.
DEBUG (36): r4836= 0.
DEBUG (36): s36[0]= 0.513500.
DEBUG (36): s36[1]= 1.000000.
DEBUG (36): s36[2]= 0.000000.
DEBUG (36): s36[3]= 0.416700.
DEBUG (36): ws1= 4.
DEBUG (36): ws2= 4.
DEBUG (36): temppkt1= 9.
DEBUG (36): wa1= 8500.
DEBUG (36): wb1= 8780.
DEBUG (36): temppkt2= 8.
DEBUG (36): wa1= 5000.
DEBUG (36): wb1= 7800.
DEBUG (36): wa2= 0.500000.
DEBUG (36): wb2= 0.780000.
DEBUG (36): temppkt->n1= 9.
DEBUG (36): temppkt->n2= 8.
DEBUG (36): temppkt->n3= 100.
DEBUG (36): temppkt->n4= 100.
DEBUG (36): temppkt->n5= 100.
DEBUG (36): temppkt->n6= 100.
DEBUG (36): m48-36= 0.985092.
DEBUG (36): n48-36= 0.987845.
DEBUG (36): a48-36= 32767.
DEBUG (36): b48-36= 51117.
DEBUG (47): packet received from 48.
DEBUG (47): r4847= 0.
DEBUG (47): ws1= 4.
DEBUG (47): ws2= 4.
DEBUG (47): temppkt1= 9.
DEBUG (47): wa1= 8780.
DEBUG (47): wb1= 9160.
DEBUG (47): wa2= 0.878000.
DEBUG (47): wb2= 0.916000.
DEBUG (47): a1= 0.
DEBUG (47): temppkt->n1= 9.
DEBUG (47): temppkt->n2= 100.
DEBUG (47): temppkt->n3= 100.
DEBUG (47): temppkt->n4= 100.
DEBUG (47): temppkt->n5= 100.
DEBUG (47): temppkt->n6= 100.
DEBUG (47): m48-47= 0.987845.
DEBUG (47): n48-47= 0.991699.
DEBUG (47): a48-47= 57539.
DEBUG (47): b48-47= 60030.
DEBUG (14): packet received from 15.
DEBUG (14): r152714= 0.
DEBUG (14): r1514= 0.
DEBUG (14): r2714= 0.
DEBUG (14): s14[0]= 0.000000.
DEBUG (14): s14[1]= 1.000000.
DEBUG (14): s14[2]= 0.000000.
DEBUG (14): s14[3]= 0.545500.
DEBUG (14): ws1= 4.
DEBUG (14): ws2= 4.
DEBUG (14): wa2= 0.260900.
DEBUG (14): wb2= 0.592900.
DEBUG (14): temppkt->n1= 9.
DEBUG (14): temppkt->n2= 100.
DEBUG (14): temppkt->n3= 100.
DEBUG (14): temppkt->n4= 100.
DEBUG (14): temppkt->n5= 100.
DEBUG (14): temppkt->n6= 100.
DEBUG (14): m15-14= 0.260990.
DEBUG (14): n15-14= 0.592996.
DEBUG (14): a15-14= 17098.
DEBUG (14): b15-14= 38855.
DEBUG (4): packet received from 5.
DEBUG (4): r5784= 0.
DEBUG (4): r54= 0.
DEBUG (4): r74= 0.
DEBUG (4): r84= 0.
DEBUG (4): s4[0]= 0.000000.
DEBUG (4): s4[1]= 1.000000.
DEBUG (4): s4[2]= 0.548400.
DEBUG (4): s4[3]= 1.000000.
DEBUG (4): s4[4]= 0.000000.
DEBUG (4): s4[5]= 0.409100.
DEBUG (4): ws1= 4.
DEBUG (4): ws2= 4.
DEBUG (4): wa2= 0.359500.
DEBUG (4): wb2= 0.491800.
DEBUG (4): temppkt->n1= 5.
DEBUG (4): temppkt->n2= 100.
DEBUG (4): temppkt->n3= 100.
DEBUG (4): temppkt->n4= 100.
DEBUG (4): temppkt->n5= 100.
DEBUG (4): temppkt->n6= 100.
DEBUG (4): m5-4= 0.359594.
DEBUG (4): n5-4= 0.491890.
DEBUG (4): a5-4= 23559.
DEBUG (4): b5-4= 32230.
DEBUG (6): packet received from 9.
DEBUG (6): r96= 0.
DEBUG (6): ws1= 4.
DEBUG (6): ws2= 4.
DEBUG (6): temppkt1= 5.
DEBUG (6): wa1= 6600.
DEBUG (6): wb1= 7980.
DEBUG (6): wa2= 0.660000.
DEBUG (6): wb2= 0.798000.
DEBUG (6): a1= 0.
DEBUG (6): temppkt->n1= 5.
DEBUG (6): temppkt->n2= 100.
DEBUG (6): temppkt->n3= 100.
DEBUG (6): temppkt->n4= 100.
DEBUG (6): temppkt->n5= 100.
DEBUG (6): temppkt->n6= 100.
DEBUG (6): m9-6= 0.566019.
DEBUG (6): n9-6= 0.579865.
DEBUG (6): a9-6= 43253.
DEBUG (6): b9-6= 52296.
DEBUG (21): packet received from 9.
DEBUG (21): r921= 0.
DEBUG (21): ws1= 4.
DEBUG (21): ws2= 4.
DEBUG (21): temppkt1= 5.
DEBUG (21): wa1= 7980.
DEBUG (21): wb1= 9650.
DEBUG (21): wa2= 0.798000.
DEBUG (21): wb2= 0.965000.
DEBUG (21): a1= 0.
DEBUG (21): temppkt->n1= 5.
DEBUG (21): temppkt->n2= 100.
DEBUG (21): temppkt->n3= 100.
DEBUG (21): temppkt->n4= 100.
DEBUG (21): temppkt->n5= 100.
DEBUG (21): temppkt->n6= 100.
DEBUG (21): m9-21= 0.579865.
DEBUG (21): n9-21= 0.596597.
DEBUG (21): a9-21= 52296.
DEBUG (21): b9-21= 63241.
DEBUG (33): packet received from 34.
DEBUG (33): r3433= 0.
DEBUG (33): ws1= 4.
DEBUG (33): ws2= 4.
DEBUG (33): wa2= 0.779500.
DEBUG (33): wb2= 0.804400.
DEBUG (33): temppkt->n1= 100.
DEBUG (33): temppkt->n2= 100.
DEBUG (33): temppkt->n3= 100.
DEBUG (33): temppkt->n4= 100.
DEBUG (33): temppkt->n5= 100.
DEBUG (33): temppkt->n6= 100.
DEBUG (33): m34-33= 0.779599.
DEBUG (33): n34-33= 0.804486.
DEBUG (33): a34-33= 51084.
DEBUG (33): b34-33= 52716.
DEBUG (44): packet received from 45.
DEBUG (44): r4544= 0.
DEBUG (44): ws1= 4.
DEBUG (44): ws2= 4.
DEBUG (44): wa2= 0.788000.
DEBUG (44): wb2= 0.849800.
DEBUG (44): temppkt->n1= 9.
DEBUG (44): temppkt->n2= 100.
DEBUG (44): temppkt->n3= 100.
DEBUG (44): temppkt->n4= 100.
DEBUG (44): temppkt->n5= 100.
DEBUG (44): temppkt->n6= 100.
DEBUG (44): m45-44= 0.788098.
DEBUG (44): n45-44= 0.849897.
DEBUG (44): a45-44= 51641.
DEBUG (44): b45-44= 55691.
DEBUG (31): packet received from 32.
DEBUG (31): r3231= 0.
DEBUG (31): ws1= 4.
DEBUG (31): ws2= 4.
DEBUG (31): temppkt1= 7.
DEBUG (31): wa1= 5410.
DEBUG (31): wb1= 5880.
DEBUG (31): temppkt2= 5.
DEBUG (31): wa1= 4100.
DEBUG (31): wb1= 8800.
DEBUG (31): wa2= 0.410000.
DEBUG (31): wb2= 0.880000.
DEBUG (31): temppkt->n1= 7.
DEBUG (31): temppkt->n2= 5.
DEBUG (31): temppkt->n3= 100.
DEBUG (31): temppkt->n4= 100.
DEBUG (31): temppkt->n5= 100.
DEBUG (31): temppkt->n6= 100.
DEBUG (31): m32-31= 0.754149.
DEBUG (31): n32-31= 0.758892.
DEBUG (31): a32-31= 26869.
DEBUG (31): b32-31= 57670.
DEBUG (14): packet received from 27.
DEBUG (14): r152714= 0.
DEBUG (14): r1514= 0.
DEBUG (14): r2714= 0.
DEBUG (14): s14[0]= 0.000000.
DEBUG (14): s14[1]= 1.000000.
DEBUG (14): s14[2]= 0.000000.
DEBUG (14): s14[3]= 0.545500.
DEBUG (14): ws1= 4.
DEBUG (14): ws2= 4.
DEBUG (14): temppkt1= 6.
DEBUG (14): wa1= 8260.
DEBUG (14): wb1= 9080.
DEBUG (14): wa2= 0.826000.
DEBUG (14): wb2= 0.908000.
DEBUG (14): a1= 0.
DEBUG (14): temppkt->n1= 6.
DEBUG (14): temppkt->n2= 100.
DEBUG (14): temppkt->n3= 100.
DEBUG (14): temppkt->n4= 100.
DEBUG (14): temppkt->n5= 100.
DEBUG (14): temppkt->n6= 100.
DEBUG (14): m27-14= 0.682689.
DEBUG (14): n27-14= 0.690821.
DEBUG (14): a27-14= 54131.
DEBUG (14): b27-14= 59505.
DEBUG (26): packet received from 27.
DEBUG (26): r273726= 0.
DEBUG (26): r2726= 0.
DEBUG (26): r3726= 0.
DEBUG (26): s26[0]= 0.545500.
DEBUG (26): s26[1]= 1.000000.
DEBUG (26): s26[2]= 0.000000.
DEBUG (26): s26[3]= 0.513500.
DEBUG (26): ws1= 4.
DEBUG (26): ws2= 4.
DEBUG (26): temppkt1= 6.
DEBUG (26): wa1= 9080.
DEBUG (26): wb1= 9750.
DEBUG (26): temppkt2= 9.
DEBUG (26): wa1= 800.
DEBUG (26): wb1= 7500.
DEBUG (26): wa2= 0.080000.
DEBUG (26): wb2= 0.750000.
DEBUG (26): temppkt->n1= 6.
DEBUG (26): temppkt->n2= 9.
DEBUG (26): temppkt->n3= 100.
DEBUG (26): temppkt->n4= 100.
DEBUG (26): temppkt->n5= 100.
DEBUG (26): temppkt->n6= 100.
DEBUG (26): m27-26= 0.690821.
DEBUG (26): n27-26= 0.697597.
DEBUG (26): a27-26= 5242.
DEBUG (26): b27-26= 49151.
DEBUG (12): packet received from 13.
DEBUG (12): r132512= 0.
DEBUG (12): r1312= 0.
DEBUG (12): r2512= 0.
DEBUG (12): s12[0]= 0.000000.
DEBUG (12): s12[1]= 1.000000.
DEBUG (12): s12[2]= 0.000000.
DEBUG (12): s12[3]= 0.511600.
DEBUG (12): ws1= 4.
DEBUG (12): ws2= 4.
DEBUG (12): wa2= 0.366900.
DEBUG (12): wb2= 0.930900.
DEBUG (12): temppkt->n1= 8.
DEBUG (12): temppkt->n2= 100.
DEBUG (12): temppkt->n3= 100.
DEBUG (12): temppkt->n4= 100.
DEBUG (12): temppkt->n5= 100.
DEBUG (12): temppkt->n6= 100.
DEBUG (12): m13-12= 0.366995.
DEBUG (12): n13-12= 0.930999.
DEBUG (12): a13-12= 24044.
DEBUG (12): b13-12= 61006.
DEBUG (39): packet received from 49.
DEBUG (39): r404939= 0.
DEBUG (39): r4039= 0.
DEBUG (39): r4939= 0.
DEBUG (39): s39[0]= 0.000000.
DEBUG (39): s39[1]= 1.000000.
DEBUG (39): s39[2]= 0.000000.
DEBUG (39): s39[3]= 0.428600.
DEBUG (39): ws1= 4.
DEBUG (39): ws2= 4.
DEBUG (39): temppkt1= 9.
DEBUG (39): wa1= 9160.
DEBUG (39): wb1= 9520.
DEBUG (39): temppkt2= 9.
DEBUG (39): wa1= 1600.
DEBUG (39): wb1= 5200.
DEBUG (39): wa2= 0.160000.
DEBUG (39): wb2= 0.520000.
DEBUG (39): temppkt->n1= 9.
DEBUG (39): temppkt->n2= 9.
DEBUG (39): temppkt->n3= 100.
DEBUG (39): temppkt->n4= 100.
DEBUG (39): temppkt->n5= 100.
DEBUG (39): temppkt->n6= 100.
DEBUG (39): m49-39= 0.991699.
DEBUG (39): n49-39= 0.995257.
DEBUG (39): a49-39= 10485.
DEBUG (39): b49-39= 34078.
DEBUG (48): packet received from 49.
DEBUG (48): r4948= 0.
DEBUG (48): ws1= 4.
DEBUG (48): ws2= 5.
DEBUG (48): wa2= 0.995200.
DEBUG (48): wb2= 1.000000.
DEBUG (48): temppkt->n1= 100.
DEBUG (48): temppkt->n2= 100.
DEBUG (48): temppkt->n3= 100.
DEBUG (48): temppkt->n4= 100.
DEBUG (48): temppkt->n5= 100.
DEBUG (48): temppkt->n6= 100.
DEBUG (48): m49-48= 0.995257.
DEBUG (48): n49-48= 1.000000.
DEBUG (48): a49-48= 65220.
DEBUG (48): b49-48= 65535.
DEBUG (29): packet received from 30.
DEBUG (29): r3029= 0.
DEBUG (29): ws1= 4.
DEBUG (29): ws2= 4.
DEBUG (29): temppkt1= 7.
DEBUG (29): wa1= 2900.
DEBUG (29): wb1= 4390.
DEBUG (29): wa2= 0.290000.
DEBUG (29): wb2= 0.439000.
DEBUG (29): a1= 0.
DEBUG (29): temppkt->n1= 7.
DEBUG (29): temppkt->n2= 100.
DEBUG (29): temppkt->n3= 100.
DEBUG (29): temppkt->n4= 100.
DEBUG (29): temppkt->n5= 100.
DEBUG (29): temppkt->n6= 100.
DEBUG (29): m30-29= 0.729091.
DEBUG (29): n30-29= 0.743999.
DEBUG (29): a30-29= 19005.
DEBUG (29): b30-29= 28769.
DEBUG (10): packet received from 11.
DEBUG (10): r112310= 0.
DEBUG (10): r1110= 0.
DEBUG (10): r2310= 0.
DEBUG (10): s10[0]= 0.000000.
DEBUG (10): s10[1]= 1.000000.
DEBUG (10): s10[2]= 0.000000.
DEBUG (10): s10[3]= 0.485700.
DEBUG (10): ws1= 4.
DEBUG (10): ws2= 4.
DEBUG (10): wa2= 0.311800.
DEBUG (10): wb2= 0.430800.
DEBUG (10): temppkt->n1= 6.
DEBUG (10): temppkt->n2= 100.
DEBUG (10): temppkt->n3= 100.
DEBUG (10): temppkt->n4= 100.
DEBUG (10): temppkt->n5= 100.
DEBUG (10): temppkt->n6= 100.
DEBUG (10): m11-10= 0.311894.
DEBUG (10): n11-10= 0.430900.
DEBUG (10): a11-10= 20433.
DEBUG (10): b11-10= 28232.
DEBUG (22): packet received from 33.
DEBUG (22): r233322= 0.
DEBUG (22): r2322= 0.
DEBUG (22): r3322= 0.
DEBUG (22): s22[0]= 0.485700.
DEBUG (22): s22[1]= 1.000000.
DEBUG (22): s22[2]= 0.000000.
DEBUG (22): s22[3]= 0.561000.
DEBUG (22): ws1= 4.
DEBUG (22): ws2= 4.
DEBUG (22): temppkt1= 7.
DEBUG (22): wa1= 7940.
DEBUG (22): wb1= 9340.
DEBUG (22): wa2= 0.794000.
DEBUG (22): wb2= 0.934000.
DEBUG (22): a1= 0.
DEBUG (22): temppkt->n1= 7.
DEBUG (22): temppkt->n2= 100.
DEBUG (22): temppkt->n3= 100.
DEBUG (22): temppkt->n4= 100.
DEBUG (22): temppkt->n5= 100.
DEBUG (22): temppkt->n6= 100.
DEBUG (22): m33-22= 0.779492.
DEBUG (22): n33-22= 0.793462.
DEBUG (22): a33-22= 52034.
DEBUG (22): b33-22= 61209.
DEBUG (1): packet received from 3.
DEBUG (1): r341= 0.
DEBUG (1): r31= 0.
DEBUG (1): r41= 0.
DEBUG (1): s1[0]= 0.000000.
DEBUG (1): s1[1]= 1.000000.
DEBUG (1): s1[2]= 0.000000.
DEBUG (1): s1[3]= 1.000000.
DEBUG (1): ws1= 4.
DEBUG (1): ws2= 4.
DEBUG (1): wa2= 0.240900.
DEBUG (1): wb2= 0.722900.
DEBUG (1): temppkt->n1= 4.
DEBUG (1): temppkt->n2= 100.
DEBUG (1): temppkt->n3= 100.
DEBUG (1): temppkt->n4= 100.
DEBUG (1): temppkt->n5= 100.
DEBUG (1): temppkt->n6= 100.
DEBUG (1): m3-1= 0.240986.
DEBUG (1): n3-1= 0.722988.
DEBUG (1): a3-1= 15787.
DEBUG (1): b3-1= 47375.
DEBUG (26): packet received from 37.
DEBUG (26): r273726= 0.
DEBUG (26): r2726= 0.
DEBUG (26): r3726= 0.
DEBUG (26): s26[0]= 0.545500.
DEBUG (26): s26[1]= 1.000000.
DEBUG (26): s26[2]= 0.000000.
DEBUG (26): s26[3]= 0.513500.
DEBUG (26): ws1= 4.
DEBUG (26): ws2= 4.
DEBUG (26): temppkt2= 6.
DEBUG (26): wa1= 690.
DEBUG (26): wb1= 7060.
DEBUG (26): wa2= 0.069000.
DEBUG (26): wb2= 0.706000.
DEBUG (26): temppkt->n1= 8.
DEBUG (26): temppkt->n2= 6.
DEBUG (26): temppkt->n3= 100.
DEBUG (26): temppkt->n4= 100.
DEBUG (26): temppkt->n5= 100.
DEBUG (26): temppkt->n6= 100.
DEBUG (26): m37-26= 0.606989.
DEBUG (26): n37-26= 0.670668.
DEBUG (26): a37-26= 4521.
DEBUG (26): b37-26= 46267.
DEBUG (2): packet received from 6.
DEBUG (2): r62= 0.
DEBUG (2): ws1= 4.
DEBUG (2): ws2= 4.
DEBUG (2): wa2= 0.659900.
DEBUG (2): wb2= 0.797900.
DEBUG (2): temppkt->n1= 5.
DEBUG (2): temppkt->n2= 100.
DEBUG (2): temppkt->n3= 100.
DEBUG (2): temppkt->n4= 100.
DEBUG (2): temppkt->n5= 100.
DEBUG (2): temppkt->n6= 100.
DEBUG (2): m6-2= 0.659998.
DEBUG (2): n6-2= 0.797986.
DEBUG (2): a6-2= 43246.
DEBUG (2): b6-2= 52290.
DEBUG (47): packet received from 48.
DEBUG (47): r4847= 0.
DEBUG (47): ws1= 4.
DEBUG (47): ws2= 5.
DEBUG (47): wa2= 0.997100.
DEBUG (47): wb2= 1.000000.
DEBUG (47): temppkt->n1= 100.
DEBUG (47): temppkt->n2= 100.
DEBUG (47): temppkt->n3= 100.
DEBUG (47): temppkt->n4= 100.
DEBUG (47): temppkt->n5= 100.
DEBUG (47): temppkt->n6= 100.
DEBUG (47): m48-47= 0.997196.
DEBUG (47): n48-47= 1.000000.
DEBUG (47): a48-47= 65344.
DEBUG (47): b48-47= 65535.
DEBUG (11): packet received from 12.
DEBUG (11): r1211= 0.
DEBUG (11): ws1= 4.
DEBUG (11): ws2= 4.
DEBUG (11): wa2= 0.366800.
DEBUG (11): wb2= 0.930800.
DEBUG (11): temppkt->n1= 8.
DEBUG (11): temppkt->n2= 100.
DEBUG (11): temppkt->n3= 100.
DEBUG (11): temppkt->n4= 100.
DEBUG (11): temppkt->n5= 100.
DEBUG (11): temppkt->n6= 100.
DEBUG (11): m12-11= 0.366888.
DEBUG (11): n12-11= 0.930892.
DEBUG (11): a12-11= 24038.
DEBUG (11): b12-11= 60999.
DEBUG (1): packet received from 4.
DEBUG (1): r341= 0.
DEBUG (1): r31= 0.
DEBUG (1): r41= 0.
DEBUG (1): s1[0]= 0.000000.
DEBUG (1): s1[1]= 1.000000.
DEBUG (1): s1[2]= 0.000000.
DEBUG (1): s1[3]= 1.000000.
DEBUG (1): ws1= 4.
DEBUG (1): ws2= 4.
DEBUG (1): wa2= 0.359400.
DEBUG (1): wb2= 0.491700.
DEBUG (1): temppkt->n1= 5.
DEBUG (1): temppkt->n2= 100.
DEBUG (1): temppkt->n3= 100.
DEBUG (1): temppkt->n4= 100.
DEBUG (1): temppkt->n5= 100.
DEBUG (1): temppkt->n6= 100.
DEBUG (1): m4-1= 0.359487.
DEBUG (1): n4-1= 0.491798.
DEBUG (1): a4-1= 23553.
DEBUG (1): b4-1= 32223.
DEBUG (7): packet received from 10.
DEBUG (7): r10227= 0.
DEBUG (7): r107= 0.
DEBUG (7): r227= 0.
DEBUG (7): s7[0]= 0.000000.
DEBUG (7): s7[1]= 1.000000.
DEBUG (7): s7[2]= 0.000000.
DEBUG (7): s7[3]= 1.000000.
DEBUG (7): ws1= 4.
DEBUG (7): ws2= 4.
DEBUG (7): wa2= 0.311700.
DEBUG (7): wb2= 0.430700.
DEBUG (7): temppkt->n1= 6.
DEBUG (7): temppkt->n2= 100.
DEBUG (7): temppkt->n3= 100.
DEBUG (7): temppkt->n4= 100.
DEBUG (7): temppkt->n5= 100.
DEBUG (7): temppkt->n6= 100.
DEBUG (7): m10-7= 0.311788.
DEBUG (7): n10-7= 0.430793.
DEBUG (7): a10-7= 20427.
DEBUG (7): b10-7= 28225.
DEBUG (16): packet received from 29.
DEBUG (16): r172916= 0.
DEBUG (16): r1716= 0.
DEBUG (16): r2916= 0.
DEBUG (16): s16[0]= 0.000000.
DEBUG (16): s16[1]= 1.000000.
DEBUG (16): s16[2]= 0.000000.
DEBUG (16): s16[3]= 0.541700.
DEBUG (16): ws1= 4.
DEBUG (16): ws2= 4.
DEBUG (16): wa2= 0.289900.
DEBUG (16): wb2= 0.370700.
DEBUG (16): temppkt->n1= 7.
DEBUG (16): temppkt->n2= 100.
DEBUG (16): temppkt->n3= 100.
DEBUG (16): temppkt->n4= 100.
DEBUG (16): temppkt->n5= 100.
DEBUG (16): temppkt->n6= 100.
DEBUG (16): m29-16= 0.289998.
DEBUG (16): n29-16= 0.370705.
DEBUG (16): a29-16= 18998.
DEBUG (16): b29-16= 24293.
DEBUG (13): packet received from 14.
DEBUG (13): r1413= 0.
DEBUG (13): ws1= 4.
DEBUG (13): ws2= 4.
DEBUG (13): wa2= 0.825900.
DEBUG (13): wb2= 0.907900.
DEBUG (13): temppkt->n1= 6.
DEBUG (13): temppkt->n2= 100.
DEBUG (13): temppkt->n3= 100.
DEBUG (13): temppkt->n4= 100.
DEBUG (13): temppkt->n5= 100.
DEBUG (13): temppkt->n6= 100.
DEBUG (13): m14-13= 0.825986.
DEBUG (13): n14-13= 0.907988.
DEBUG (13): a14-13= 54125.
DEBUG (13): b14-13= 59499.
DEBUG (25): packet received from 26.
DEBUG (25): r2625= 0.
DEBUG (25): ws1= 3.
DEBUG (25): ws2= 4.
DEBUG (25): wa2= 0.068900.
DEBUG (25): wb2= 0.705900.
DEBUG (25): temppkt->n1= 8.
DEBUG (25): temppkt->n2= 6.
DEBUG (25): temppkt->n3= 100.
DEBUG (25): temppkt->n4= 100.
DEBUG (25): temppkt->n5= 100.
DEBUG (25): temppkt->n6= 100.
DEBUG (25): m26-25= 0.068986.
DEBUG (25): n26-25= 0.705989.
DEBUG (25): a26-25= 4515.
DEBUG (25): b26-25= 46261.
DEBUG (35): packet received from 36.
DEBUG (35): r3635= 0.
DEBUG (35): ws1= 4.
DEBUG (35): ws2= 4.
DEBUG (35): wa2= 0.499900.
DEBUG (35): wb2= 0.779900.
DEBUG (35): temppkt->n1= 9.
DEBUG (35): temppkt->n2= 8.
DEBUG (35): temppkt->n3= 100.
DEBUG (35): temppkt->n4= 100.
DEBUG (35): temppkt->n5= 100.
DEBUG (35): temppkt->n6= 100.
DEBUG (35): m36-35= 0.499992.
DEBUG (35): n36-35= 0.779995.
DEBUG (35): a36-35= 32760.
DEBUG (35): b36-35= 51110.
DEBUG (30): packet received from 31.
DEBUG (30): r314130= 0.
DEBUG (30): r3130= 0.
DEBUG (30): r4130= 0.
DEBUG (30): s30[0]= 0.000000.
DEBUG (30): s30[1]= 0.400000.
DEBUG (30): s30[2]= 0.000000.
DEBUG (30): s30[3]= 0.473700.
DEBUG (30): ws1= 4.
DEBUG (30): ws2= 4.
DEBUG (30): wa2= 0.409900.
DEBUG (30): wb2= 0.597900.
DEBUG (30): temppkt->n1= 7.
DEBUG (30): temppkt->n2= 5.
DEBUG (30): temppkt->n3= 100.
DEBUG (30): temppkt->n4= 100.
DEBUG (30): temppkt->n5= 100.
DEBUG (30): temppkt->n6= 100.
DEBUG (30): m31-30= 0.409995.
DEBUG (30): n31-30= 0.597992.
DEBUG (30): a31-30= 26862.
DEBUG (30): b31-30= 39183.
DEBUG (38): packet received from 39.
DEBUG (38): r3938= 0.
DEBUG (38): ws1= 4.
DEBUG (38): ws2= 4.
DEBUG (38): wa2= 0.327100.
DEBUG (38): wb2= 0.519900.
DEBUG (38): temppkt->n1= 9.
DEBUG (38): temppkt->n2= 9.
DEBUG (38): temppkt->n3= 100.
DEBUG (38): temppkt->n4= 100.
DEBUG (38): temppkt->n5= 100.
DEBUG (38): temppkt->n6= 100.
DEBUG (38): m39-38= 0.327142.
DEBUG (38): n39-38= 0.519997.
DEBUG (38): a39-38= 21436.
DEBUG (38): b39-38= 34071.
DEBUG (4): packet received from 7.
DEBUG (4): r5784= 0.
DEBUG (4): r54= 0.
DEBUG (4): r74= 0.
DEBUG (4): r84= 0.
DEBUG (4): s4[0]= 0.000000.
DEBUG (4): s4[1]= 1.000000.
DEBUG (4): s4[2]= 0.548400.
DEBUG (4): s4[3]= 1.000000.
DEBUG (4): s4[4]= 0.000000.
DEBUG (4): s4[5]= 0.409100.
DEBUG (4): ws1= 4.
DEBUG (4): ws2= 4.
DEBUG (4): wa2= 0.376900.
DEBUG (4): wb2= 0.430600.
DEBUG (4): temppkt->n1= 6.
DEBUG (4): temppkt->n2= 100.
DEBUG (4): temppkt->n3= 100.
DEBUG (4): temppkt->n4= 100.
DEBUG (4): temppkt->n5= 100.
DEBUG (4): temppkt->n6= 100.
DEBUG (4): m7-4= 0.376950.
DEBUG (4): n7-4= 0.430686.
DEBUG (4): a7-4= 24700.
DEBUG (4): b7-4= 28219.
DEBUG (50): packet received from 2.
DEBUG (50): sourceid= 9.
DEBUG (50): r1250= 0.
DEBUG (50): r150= 0.
DEBUG (50): r250= 0.
DEBUG (50): s50[0]= 0.000000.
DEBUG (50): s50[1]= 1.000000.
DEBUG (50): s50[2]= 0.000000.
DEBUG (50): s50[3]= 1.000000.
DEBUG (50): a1= 43246.
DEBUG (50): b1= 52290.
DEBUG (50): btrpkt->n1= 5.
DEBUG (50): btrpkt->n2= 100.
DEBUG (50): btrpkt->n3= 100.
DEBUG (50): btrpkt->n4= 100.
DEBUG (50): btrpkt->n5= 100.
DEBUG (50): btrpkt->n6= 100.
DEBUG (50): ws1= 4.
DEBUG (50): ws2= 4.
DEBUG (50): wa2= 0.659800.
DEBUG (50): wb2= 0.797800.
DEBUG (50): btrpkt->n1= 5.
DEBUG (50): btrpkt->n2= 100.
DEBUG (50): btrpkt->n3= 100.
DEBUG (50): btrpkt->n4= 100.
DEBUG (50): btrpkt->n5= 100.
DEBUG (50): btrpkt->n6= 100.
DEBUG (50): m= 0.659892.
DEBUG (50): n= 0.797894.
DEBUG (50): a2= 43239.
DEBUG (50): b2= 52283.
DEBUG (24): packet received from 25.
DEBUG (24): r253524= 0.
DEBUG (24): r2524= 0.
DEBUG (24): r3524= 0.
DEBUG (24): s24[0]= 0.511600.
DEBUG (24): s24[1]= 1.000000.
DEBUG (24): s24[2]= 0.000000.
DEBUG (24): s24[3]= 0.448300.
DEBUG (24): ws1= 4.
DEBUG (24): ws2= 4.
DEBUG (24): wa2= 0.394700.
DEBUG (24): wb2= 0.705800.
DEBUG (24): temppkt->n1= 8.
DEBUG (24): temppkt->n2= 6.
DEBUG (24): temppkt->n3= 100.
DEBUG (24): temppkt->n4= 100.
DEBUG (24): temppkt->n5= 100.
DEBUG (24): temppkt->n6= 100.
DEBUG (24): m25-24= 0.394785.
DEBUG (24): n25-24= 0.705898.
DEBUG (24): a25-24= 25866.
DEBUG (24): b25-24= 46254.
DEBUG (12): packet received from 25.
DEBUG (12): r132512= 0.
DEBUG (12): r1312= 0.
DEBUG (12): r2512= 0.
DEBUG (12): s12[0]= 0.000000.
DEBUG (12): s12[1]= 1.000000.
DEBUG (12): s12[2]= 0.000000.
DEBUG (12): s12[3]= 0.511600.
DEBUG (12): ws1= 3.
DEBUG (12): ws2= 4.
DEBUG (12): wa2= 0.068800.
DEBUG (12): wb2= 0.394700.
DEBUG (12): temppkt->n1= 8.
DEBUG (12): temppkt->n2= 6.
DEBUG (12): temppkt->n3= 100.
DEBUG (12): temppkt->n4= 100.
DEBUG (12): temppkt->n5= 100.
DEBUG (12): temppkt->n6= 100.
DEBUG (12): m25-12= 0.068894.
DEBUG (12): n25-12= 0.394785.
DEBUG (12): a25-12= 4508.
DEBUG (12): b25-12= 25866.
DEBUG (7): packet received from 22.
DEBUG (7): r10227= 0.
DEBUG (7): r107= 0.
DEBUG (7): r227= 0.
DEBUG (7): s7[0]= 0.000000.
DEBUG (7): s7[1]= 1.000000.
DEBUG (7): s7[2]= 0.000000.
DEBUG (7): s7[3]= 1.000000.
DEBUG (7): ws1= 4.
DEBUG (7): ws2= 4.
DEBUG (7): wa2= 0.793900.
DEBUG (7): wb2= 0.933900.
DEBUG (7): temppkt->n1= 7.
DEBUG (7): temppkt->n2= 100.
DEBUG (7): temppkt->n3= 100.
DEBUG (7): temppkt->n4= 100.
DEBUG (7): temppkt->n5= 100.
DEBUG (7): temppkt->n6= 100.
DEBUG (7): m22-7= 0.793988.
DEBUG (7): n22-7= 0.933989.
DEBUG (7): a22-7= 52028.
DEBUG (7): b22-7= 61203.
DEBUG (46): packet received from 47.
DEBUG (46): r4746= 0.
DEBUG (46): ws1= 4.
DEBUG (46): ws2= 5.
DEBUG (46): wa2= 0.997000.
DEBUG (46): wb2= 1.000000.
DEBUG (46): temppkt->n1= 100.
DEBUG (46): temppkt->n2= 100.
DEBUG (46): temppkt->n3= 100.
DEBUG (46): temppkt->n4= 100.
DEBUG (46): temppkt->n5= 100.
DEBUG (46): temppkt->n6= 100.
DEBUG (46): m47-46= 0.997086.
DEBUG (46): n47-46= 1.000000.
DEBUG (46): a47-46= 65338.
DEBUG (46): b47-46= 65535.
DEBUG (10): packet received from 11.
DEBUG (10): r112310= 0.
DEBUG (10): r1110= 0.
DEBUG (10): r2310= 0.
DEBUG (10): s10[0]= 0.000000.
DEBUG (10): s10[1]= 1.000000.
DEBUG (10): s10[2]= 0.000000.
DEBUG (10): s10[3]= 0.485700.
DEBUG (10): ws1= 4.
DEBUG (10): ws2= 4.
DEBUG (10): wa2= 0.366700.
DEBUG (10): wb2= 0.930700.
DEBUG (10): temppkt->n1= 8.
DEBUG (10): temppkt->n2= 100.
DEBUG (10): temppkt->n3= 100.
DEBUG (10): temppkt->n4= 100.
DEBUG (10): temppkt->n5= 100.
DEBUG (10): temppkt->n6= 100.
DEBUG (10): m11-10= 0.366796.
DEBUG (10): n11-10= 0.930785.
DEBUG (10): a11-10= 24031.
DEBUG (10): b11-10= 60993.
DEBUG (50): packet received from 1.
DEBUG (50): sourceid= 21.
DEBUG (50): r1250= 0.
DEBUG (50): r150= 0.
DEBUG (50): r250= 0.
DEBUG (50): s50[0]= 0.000000.
DEBUG (50): s50[1]= 1.000000.
DEBUG (50): s50[2]= 0.000000.
DEBUG (50): s50[3]= 1.000000.
DEBUG (50): a1= 23553.
DEBUG (50): b1= 32223.
DEBUG (50): btrpkt->n1= 5.
DEBUG (50): btrpkt->n2= 100.
DEBUG (50): btrpkt->n3= 100.
DEBUG (50): btrpkt->n4= 100.
DEBUG (50): btrpkt->n5= 100.
DEBUG (50): btrpkt->n6= 100.
DEBUG (50): ws1= 4.
DEBUG (50): ws2= 4.
DEBUG (50): wa2= 0.359300.
DEBUG (50): wb2= 0.491600.
DEBUG (50): btrpkt->n1= 5.
DEBUG (50): btrpkt->n2= 100.
DEBUG (50): btrpkt->n3= 100.
DEBUG (50): btrpkt->n4= 100.
DEBUG (50): btrpkt->n5= 100.
DEBUG (50): btrpkt->n6= 100.
DEBUG (50): m= 0.359396.
DEBUG (50): n= 0.491691.
DEBUG (50): a2= 23546.
DEBUG (50): b2= 32217.
DEBUG (12): packet received from 13.
DEBUG (12): r132512= 0.
DEBUG (12): r1312= 0.
DEBUG (12): r2512= 0.
DEBUG (12): s12[0]= 0.000000.
DEBUG (12): s12[1]= 1.000000.
DEBUG (12): s12[2]= 0.000000.
DEBUG (12): s12[3]= 0.511600.
DEBUG (12): ws1= 4.
DEBUG (12): ws2= 4.
DEBUG (12): wa2= 0.825800.
DEBUG (12): wb2= 0.907800.
DEBUG (12): temppkt->n1= 6.
DEBUG (12): temppkt->n2= 100.
DEBUG (12): temppkt->n3= 100.
DEBUG (12): temppkt->n4= 100.
DEBUG (12): temppkt->n5= 100.
DEBUG (12): temppkt->n6= 100.
DEBUG (12): m13-12= 0.825895.
DEBUG (12): n13-12= 0.907897.
DEBUG (12): a13-12= 54118.
DEBUG (12): b13-12= 59492.
DEBUG (7): packet received from 10.
DEBUG (7): r10227= 0.
DEBUG (7): r107= 0.
DEBUG (7): r227= 0.
DEBUG (7): s7[0]= 0.000000.
DEBUG (7): s7[1]= 1.000000.
DEBUG (7): s7[2]= 0.000000.
DEBUG (7): s7[3]= 1.000000.
DEBUG (7): ws1= 4.
DEBUG (7): ws2= 4.
DEBUG (7): wa2= 0.366600.
DEBUG (7): wb2= 0.930600.
DEBUG (7): temppkt->n1= 8.
DEBUG (7): temppkt->n2= 100.
DEBUG (7): temppkt->n3= 100.
DEBUG (7): temppkt->n4= 100.
DEBUG (7): temppkt->n5= 100.
DEBUG (7): temppkt->n6= 100.
DEBUG (7): m10-7= 0.366690.
DEBUG (7): n10-7= 0.930694.
DEBUG (7): a10-7= 24025.
DEBUG (7): b10-7= 60986.
DEBUG (15): packet received from 16.
DEBUG (15): r1615= 0.
DEBUG (15): ws1= 4.
DEBUG (15): ws2= 4.
DEBUG (15): wa2= 0.289800.
DEBUG (15): wb2= 0.370600.
DEBUG (15): temppkt->n1= 7.
DEBUG (15): temppkt->n2= 100.
DEBUG (15): temppkt->n3= 100.
DEBUG (15): temppkt->n4= 100.
DEBUG (15): temppkt->n5= 100.
DEBUG (15): temppkt->n6= 100.
DEBUG (15): m16-15= 0.289891.
DEBUG (15): n16-15= 0.370687.
DEBUG (15): a16-15= 18992.
DEBUG (15): b16-15= 24287.
DEBUG (1): packet received from 4.
DEBUG (1): r341= 0.
DEBUG (1): r31= 0.
DEBUG (1): r41= 0.
DEBUG (1): s1[0]= 0.000000.
DEBUG (1): s1[1]= 1.000000.
DEBUG (1): s1[2]= 0.000000.
DEBUG (1): s1[3]= 1.000000.
DEBUG (1): ws1= 4.
DEBUG (1): ws2= 4.
DEBUG (1): wa2= 0.376800.
DEBUG (1): wb2= 0.430500.
DEBUG (1): temppkt->n1= 6.
DEBUG (1): temppkt->n2= 100.
DEBUG (1): temppkt->n3= 100.
DEBUG (1): temppkt->n4= 100.
DEBUG (1): temppkt->n5= 100.
DEBUG (1): temppkt->n6= 100.
DEBUG (1): m4-1= 0.376898.
DEBUG (1): n4-1= 0.430594.
DEBUG (1): a4-1= 24693.
DEBUG (1): b4-1= 28212.
DEBUG (11): packet received from 12.
DEBUG (11): r1211= 0.
DEBUG (11): ws1= 4.
DEBUG (11): ws2= 4.
DEBUG (11): wa2= 0.825700.
DEBUG (11): wb2= 0.907700.
DEBUG (11): temppkt->n1= 6.
DEBUG (11): temppkt->n2= 100.
DEBUG (11): temppkt->n3= 100.
DEBUG (11): temppkt->n4= 100.
DEBUG (11): temppkt->n5= 100.
DEBUG (11): temppkt->n6= 100.
DEBUG (11): m12-11= 0.825788.
DEBUG (11): n12-11= 0.907790.
DEBUG (11): a12-11= 54112.
DEBUG (11): b12-11= 59486.
DEBUG (37): packet received from 38.
DEBUG (37): r3837= 0.
DEBUG (37): ws1= 4.
DEBUG (37): ws2= 4.
DEBUG (37): wa2= 0.327000.
DEBUG (37): wb2= 0.519800.
DEBUG (37): temppkt->n1= 9.
DEBUG (37): temppkt->n2= 9.
DEBUG (37): temppkt->n3= 100.
DEBUG (37): temppkt->n4= 100.
DEBUG (37): temppkt->n5= 100.
DEBUG (37): temppkt->n6= 100.
DEBUG (37): m38-37= 0.327092.
DEBUG (37): n38-37= 0.519890.
DEBUG (37): a38-37= 21429.
DEBUG (37): b38-37= 34065.
DEBUG (24): packet received from 35.
DEBUG (24): r253524= 0.
DEBUG (24): r2524= 0.
DEBUG (24): r3524= 0.
DEBUG (24): s24[0]= 0.511600.
DEBUG (24): s24[1]= 1.000000.
DEBUG (24): s24[2]= 0.000000.
DEBUG (24): s24[3]= 0.448300.
DEBUG (24): ws1= 4.
DEBUG (24): ws2= 4.
DEBUG (24): wa2= 0.499800.
DEBUG (24): wb2= 0.625400.
DEBUG (24): temppkt->n1= 9.
DEBUG (24): temppkt->n2= 8.
DEBUG (24): temppkt->n3= 100.
DEBUG (24): temppkt->n4= 100.
DEBUG (24): temppkt->n5= 100.
DEBUG (24): temppkt->n6= 100.
DEBUG (24): m35-24= 0.499886.
DEBUG (24): n35-24= 0.625411.
DEBUG (24): a35-24= 32754.
DEBUG (24): b35-24= 40985.
DEBUG (14): packet received from 15.
DEBUG (14): r152714= 0.
DEBUG (14): r1514= 0.
DEBUG (14): r2714= 0.
DEBUG (14): s14[0]= 0.000000.
DEBUG (14): s14[1]= 1.000000.
DEBUG (14): s14[2]= 0.000000.
DEBUG (14): s14[3]= 0.545500.
DEBUG (14): ws1= 4.
DEBUG (14): ws2= 4.
DEBUG (14): wa2= 0.289700.
DEBUG (14): wb2= 0.370500.
DEBUG (14): temppkt->n1= 7.
DEBUG (14): temppkt->n2= 100.
DEBUG (14): temppkt->n3= 100.
DEBUG (14): temppkt->n4= 100.
DEBUG (14): temppkt->n5= 100.
DEBUG (14): temppkt->n6= 100.
DEBUG (14): m15-14= 0.289799.
DEBUG (14): n15-14= 0.370596.
DEBUG (14): a15-14= 18985.
DEBUG (14): b15-14= 24280.
DEBUG (45): packet received from 46.
DEBUG (45): r4645= 0.
DEBUG (45): ws1= 4.
DEBUG (45): ws2= 5.
DEBUG (45): wa2= 0.998300.
DEBUG (45): wb2= 1.000000.
DEBUG (45): temppkt->n1= 100.
DEBUG (45): temppkt->n2= 100.
DEBUG (45): temppkt->n3= 100.
DEBUG (45): temppkt->n4= 100.
DEBUG (45): temppkt->n5= 100.
DEBUG (45): temppkt->n6= 100.
DEBUG (45): m46-45= 0.998397.
DEBUG (45): n46-45= 1.000000.
DEBUG (45): a46-45= 65423.
DEBUG (45): b46-45= 65535.
DEBUG (29): packet received from 30.
DEBUG (29): r3029= 0.
DEBUG (29): ws1= 4.
DEBUG (29): ws2= 4.
DEBUG (29): wa2= 0.409800.
DEBUG (29): wb2= 0.597800.
DEBUG (29): temppkt->n1= 7.
DEBUG (29): temppkt->n2= 5.
DEBUG (29): temppkt->n3= 100.
DEBUG (29): temppkt->n4= 100.
DEBUG (29): temppkt->n5= 100.
DEBUG (29): temppkt->n6= 100.
DEBUG (29): m30-29= 0.409888.
DEBUG (29): n30-29= 0.597894.
DEBUG (29): a30-29= 26856.
DEBUG (29): b30-29= 39176.
DEBUG (23): packet received from 24.
DEBUG (23): r2423= 0.
DEBUG (23): ws1= 4.
DEBUG (23): ws2= 4.
DEBUG (23): wa2= 0.499700.
DEBUG (23): wb2= 0.625300.
DEBUG (23): temppkt->n1= 9.
DEBUG (23): temppkt->n2= 8.
DEBUG (23): temppkt->n3= 100.
DEBUG (23): temppkt->n4= 100.
DEBUG (23): temppkt->n5= 100.
DEBUG (23): temppkt->n6= 100.
DEBUG (23): m24-23= 0.499794.
DEBUG (23): n24-23= 0.625391.
DEBUG (23): a24-23= 32747.
DEBUG (23): b24-23= 40979.
DEBUG (10): packet received from 11.
DEBUG (10): r112310= 0.
DEBUG (10): r1110= 0.
DEBUG (10): r2310= 0.
DEBUG (10): s10[0]= 0.000000.
DEBUG (10): s10[1]= 1.000000.
DEBUG (10): s10[2]= 0.000000.
DEBUG (10): s10[3]= 0.485700.
DEBUG (10): ws1= 4.
DEBUG (10): ws2= 4.
DEBUG (10): wa2= 0.825600.
DEBUG (10): wb2= 0.907600.
DEBUG (10): temppkt->n1= 6.
DEBUG (10): temppkt->n2= 100.
DEBUG (10): temppkt->n3= 100.
DEBUG (10): temppkt->n4= 100.
DEBUG (10): temppkt->n5= 100.
DEBUG (10): temppkt->n6= 100.
DEBUG (10): m11-10= 0.825696.
DEBUG (10): n11-10= 0.907698.
DEBUG (10): a11-10= 54105.
DEBUG (10): b11-10= 59479.
DEBUG (4): packet received from 7.
DEBUG (4): r5784= 0.
DEBUG (4): r54= 0.
DEBUG (4): r74= 0.
DEBUG (4): r84= 0.
DEBUG (4): s4[0]= 0.000000.
DEBUG (4): s4[1]= 1.000000.
DEBUG (4): s4[2]= 0.548400.
DEBUG (4): s4[3]= 1.000000.
DEBUG (4): s4[4]= 0.000000.
DEBUG (4): s4[5]= 0.409100.
DEBUG (4): ws1= 4.
DEBUG (4): ws2= 4.
DEBUG (4): wa2= 0.675800.
DEBUG (4): wb2= 0.930500.
DEBUG (4): temppkt->n1= 8.
DEBUG (4): temppkt->n2= 100.
DEBUG (4): temppkt->n3= 100.
DEBUG (4): temppkt->n4= 100.
DEBUG (4): temppkt->n5= 100.
DEBUG (4): temppkt->n6= 100.
DEBUG (4): m7-4= 0.675889.
DEBUG (4): n7-4= 0.930587.
DEBUG (4): a7-4= 44288.
DEBUG (4): b7-4= 60980.
DEBUG (28): packet received from 29.
DEBUG (28): r293928= 0.
DEBUG (28): r2928= 0.
DEBUG (28): r3928= 0.
DEBUG (28): s28[0]= 0.541700.
DEBUG (28): s28[1]= 1.000000.
DEBUG (28): s28[2]= 0.000000.
DEBUG (28): s28[3]= 0.464300.
DEBUG (28): ws1= 4.
DEBUG (28): ws2= 4.
DEBUG (28): temppkt3= 5.
DEBUG (28): wa1= 1160.
DEBUG (28): wb1= 9770.
DEBUG (28): wa2= 0.116000.
DEBUG (28): wb2= 0.977000.
DEBUG (28): temppkt->n1= 7.
DEBUG (28): temppkt->n2= 5.
DEBUG (28): temppkt->n3= 5.
DEBUG (28): temppkt->n4= 100.
DEBUG (28): temppkt->n5= 100.
DEBUG (28): temppkt->n6= 100.
DEBUG (28): m29-28= 0.511631.
DEBUG (28): n29-28= 0.597787.
DEBUG (28): a29-28= 7602.
DEBUG (28): b29-28= 64027.
DEBUG (16): packet received from 29.
DEBUG (16): r172916= 0.
DEBUG (16): r1716= 0.
DEBUG (16): r2916= 0.
DEBUG (16): s16[0]= 0.000000.
DEBUG (16): s16[1]= 1.000000.
DEBUG (16): s16[2]= 0.000000.
DEBUG (16): s16[3]= 0.541700.
DEBUG (16): ws1= 4.
DEBUG (16): ws2= 4.
DEBUG (16): wa2= 0.409700.
DEBUG (16): wb2= 0.511600.
DEBUG (16): temppkt->n1= 7.
DEBUG (16): temppkt->n2= 5.
DEBUG (16): temppkt->n3= 100.
DEBUG (16): temppkt->n4= 100.
DEBUG (16): temppkt->n5= 100.
DEBUG (16): temppkt->n6= 100.
DEBUG (16): m29-16= 0.409796.
DEBUG (16): n29-16= 0.511631.
DEBUG (16): a29-16= 26849.
DEBUG (16): b29-16= 33527.
DEBUG (36): packet received from 37.
DEBUG (36): r374836= 0.
DEBUG (36): r3736= 0.
DEBUG (36): r4836= 0.
DEBUG (36): s36[0]= 0.513500.
DEBUG (36): s36[1]= 1.000000.
DEBUG (36): s36[2]= 0.000000.
DEBUG (36): s36[3]= 0.416700.
DEBUG (36): ws1= 4.
DEBUG (36): ws2= 4.
DEBUG (36): wa2= 0.425900.
DEBUG (36): wb2= 0.519700.
DEBUG (36): temppkt->n1= 9.
DEBUG (36): temppkt->n2= 9.
DEBUG (36): temppkt->n3= 100.
DEBUG (36): temppkt->n4= 100.
DEBUG (36): temppkt->n5= 100.
DEBUG (36): temppkt->n6= 100.
DEBUG (36): m37-36= 0.425995.
DEBUG (36): n37-36= 0.519799.
DEBUG (36): a37-36= 27911.
DEBUG (36): b37-36= 34058.
DEBUG (26): packet received from 37.
DEBUG (26): r273726= 0.
DEBUG (26): r2726= 0.
DEBUG (26): r3726= 0.
DEBUG (26): s26[0]= 0.545500.
DEBUG (26): s26[1]= 1.000000.
DEBUG (26): s26[2]= 0.000000.
DEBUG (26): s26[3]= 0.513500.
DEBUG (26): ws1= 4.
DEBUG (26): ws2= 4.
DEBUG (26): wa2= 0.326900.
DEBUG (26): wb2= 0.425900.
DEBUG (26): temppkt->n1= 9.
DEBUG (26): temppkt->n2= 9.
DEBUG (26): temppkt->n3= 100.
DEBUG (26): temppkt->n4= 100.
DEBUG (26): temppkt->n5= 100.
DEBUG (26): temppkt->n6= 100.
DEBUG (26): m37-26= 0.326986.
DEBUG (26): n37-26= 0.425995.
DEBUG (26): a37-26= 21423.
DEBUG (26): b37-26= 27911.
DEBUG (44): packet received from 45.
DEBUG (44): r4544= 0.
DEBUG (44): ws1= 4.
DEBUG (44): ws2= 5.
DEBUG (44): wa2= 0.998200.
DEBUG (44): wb2= 1.000000.
DEBUG (44): temppkt->n1= 100.
DEBUG (44): temppkt->n2= 100.
DEBUG (44): temppkt->n3= 100.
DEBUG (44): temppkt->n4= 100.
DEBUG (44): temppkt->n5= 100.
DEBUG (44): temppkt->n6= 100.
DEBUG (44): m45-44= 0.998291.
DEBUG (44): n45-44= 1.000000.
DEBUG (44): a45-44= 65417.
DEBUG (44): b45-44= 65535.
DEBUG (10): packet received from 23.
DEBUG (10): r112310= 0.
DEBUG (10): r1110= 0.
DEBUG (10): r2310= 0.
DEBUG (10): s10[0]= 0.000000.
DEBUG (10): s10[1]= 1.000000.
DEBUG (10): s10[2]= 0.000000.
DEBUG (10): s10[3]= 0.485700.
DEBUG (10): ws1= 4.
DEBUG (10): ws2= 4.
DEBUG (10): wa2= 0.499600.
DEBUG (10): wb2= 0.560600.
DEBUG (10): temppkt->n1= 9.
DEBUG (10): temppkt->n2= 8.
DEBUG (10): temppkt->n3= 100.
DEBUG (10): temppkt->n4= 100.
DEBUG (10): temppkt->n5= 100.
DEBUG (10): temppkt->n6= 100.
DEBUG (10): m23-10= 0.499687.
DEBUG (10): n23-10= 0.560697.
DEBUG (10): a23-10= 32741.
DEBUG (10): b23-10= 36738.
DEBUG (13): packet received from 14.
DEBUG (13): r1413= 0.
DEBUG (13): ws1= 4.
DEBUG (13): ws2= 4.
DEBUG (13): wa2= 0.289600.
DEBUG (13): wb2= 0.370400.
DEBUG (13): temppkt->n1= 7.
DEBUG (13): temppkt->n2= 100.
DEBUG (13): temppkt->n3= 100.
DEBUG (13): temppkt->n4= 100.
DEBUG (13): temppkt->n5= 100.
DEBUG (13): temppkt->n6= 100.
DEBUG (13): m14-13= 0.289693.
DEBUG (13): n14-13= 0.370489.
DEBUG (13): a14-13= 18978.
DEBUG (13): b14-13= 24274.
DEBUG (7): packet received from 10.
DEBUG (7): r10227= 0.
DEBUG (7): r107= 0.
DEBUG (7): r227= 0.
DEBUG (7): s7[0]= 0.000000.
DEBUG (7): s7[1]= 1.000000.
DEBUG (7): s7[2]= 0.000000.
DEBUG (7): s7[3]= 1.000000.
DEBUG (7): ws1= 4.
DEBUG (7): ws2= 4.
DEBUG (7): wa2= 0.499500.
DEBUG (7): wb2= 0.560500.
DEBUG (7): temppkt->n1= 9.
DEBUG (7): temppkt->n2= 8.
DEBUG (7): temppkt->n3= 100.
DEBUG (7): temppkt->n4= 100.
DEBUG (7): temppkt->n5= 100.
DEBUG (7): temppkt->n6= 100.
DEBUG (7): m10-7= 0.499596.
DEBUG (7): n10-7= 0.560586.
DEBUG (7): a10-7= 32734.
DEBUG (7): b10-7= 36732.
DEBUG (35): packet received from 36.
DEBUG (35): r3635= 0.
DEBUG (35): ws1= 4.
DEBUG (35): ws2= 4.
DEBUG (35): wa2= 0.425800.
DEBUG (35): wb2= 0.519600.
DEBUG (35): temppkt->n1= 9.
DEBUG (35): temppkt->n2= 9.
DEBUG (35): temppkt->n3= 100.
DEBUG (35): temppkt->n4= 100.
DEBUG (35): temppkt->n5= 100.
DEBUG (35): temppkt->n6= 100.
DEBUG (35): m36-35= 0.425895.
DEBUG (35): n36-35= 0.519692.
DEBUG (35): a36-35= 27904.
DEBUG (35): b36-35= 34051.
DEBUG (1): packet received from 4.
DEBUG (1): r341= 0.
DEBUG (1): r31= 0.
DEBUG (1): r41= 0.
DEBUG (1): s1[0]= 0.000000.
DEBUG (1): s1[1]= 1.000000.
DEBUG (1): s1[2]= 0.000000.
DEBUG (1): s1[3]= 1.000000.
DEBUG (1): ws1= 4.
DEBUG (1): ws2= 4.
DEBUG (1): wa2= 0.675700.
DEBUG (1): wb2= 0.930400.
DEBUG (1): temppkt->n1= 8.
DEBUG (1): temppkt->n2= 100.
DEBUG (1): temppkt->n3= 100.
DEBUG (1): temppkt->n4= 100.
DEBUG (1): temppkt->n5= 100.
DEBUG (1): temppkt->n6= 100.
DEBUG (1): m4-1= 0.675792.
DEBUG (1): n4-1= 0.930495.
DEBUG (1): a4-1= 44282.
DEBUG (1): b4-1= 60973.
DEBUG (15): packet received from 16.
DEBUG (15): r1615= 0.
DEBUG (15): ws1= 4.
DEBUG (15): ws2= 4.
DEBUG (15): wa2= 0.409600.
DEBUG (15): wb2= 0.511500.
DEBUG (15): temppkt->n1= 7.
DEBUG (15): temppkt->n2= 5.
DEBUG (15): temppkt->n3= 100.
DEBUG (15): temppkt->n4= 100.
DEBUG (15): temppkt->n5= 100.
DEBUG (15): temppkt->n6= 100.
DEBUG (15): m16-15= 0.409689.
DEBUG (15): n16-15= 0.511589.
DEBUG (15): a16-15= 26843.
DEBUG (15): b16-15= 33521.
DEBUG (25): packet received from 26.
DEBUG (25): r2625= 0.
DEBUG (25): ws1= 4.
DEBUG (25): ws2= 4.
DEBUG (25): wa2= 0.326800.
DEBUG (25): wb2= 0.425800.
DEBUG (25): temppkt->n1= 9.
DEBUG (25): temppkt->n2= 9.
DEBUG (25): temppkt->n3= 100.
DEBUG (25): temppkt->n4= 100.
DEBUG (25): temppkt->n5= 100.
DEBUG (25): temppkt->n6= 100.
DEBUG (25): m26-25= 0.326894.
DEBUG (25): n26-25= 0.425895.
DEBUG (25): a26-25= 21416.
DEBUG (25): b26-25= 27904.
DEBUG (3): packet received from 7.
DEBUG (3): r73= 0.
DEBUG (3): ws1= 4.
DEBUG (3): ws2= 4.
DEBUG (3): wa2= 0.499400.
DEBUG (3): wb2= 0.532900.
DEBUG (3): temppkt->n1= 9.
DEBUG (3): temppkt->n2= 8.
DEBUG (3): temppkt->n3= 100.
DEBUG (3): temppkt->n4= 100.
DEBUG (3): temppkt->n5= 100.
DEBUG (3): temppkt->n6= 100.
DEBUG (3): m7-3= 0.499489.
DEBUG (3): n7-3= 0.532944.
DEBUG (3): a7-3= 32728.
DEBUG (3): b7-3= 34923.
DEBUG (4): packet received from 7.
DEBUG (4): r5784= 0.
DEBUG (4): r54= 0.
DEBUG (4): r74= 0.
DEBUG (4): r84= 0.
DEBUG (4): s4[0]= 0.000000.
DEBUG (4): s4[1]= 1.000000.
DEBUG (4): s4[2]= 0.548400.
DEBUG (4): s4[3]= 1.000000.
DEBUG (4): s4[4]= 0.000000.
DEBUG (4): s4[5]= 0.409100.
DEBUG (4): ws1= 4.
DEBUG (4): ws2= 4.
DEBUG (4): temppkt3= 5.
DEBUG (4): wa1= 3290.
DEBUG (4): wb1= 6040.
DEBUG (4): wa2= 0.329000.
DEBUG (4): wb2= 0.604000.
DEBUG (4): temppkt->n1= 9.
DEBUG (4): temppkt->n2= 8.
DEBUG (4): temppkt->n3= 5.
DEBUG (4): temppkt->n4= 100.
DEBUG (4): temppkt->n5= 100.
DEBUG (4): temppkt->n6= 100.
DEBUG (4): m7-4= 0.532944.
DEBUG (4): n7-4= 0.560494.
DEBUG (4): a7-4= 21561.
DEBUG (4): b7-4= 39583.
DEBUG (50): packet received from 1.
DEBUG (50): sourceid= 14.
DEBUG (50): r1250= 0.
DEBUG (50): r150= 0.
DEBUG (50): r250= 0.
DEBUG (50): s50[0]= 0.000000.
DEBUG (50): s50[1]= 1.000000.
DEBUG (50): s50[2]= 0.000000.
DEBUG (50): s50[3]= 1.000000.
DEBUG (50): a1= 44282.
DEBUG (50): b1= 60973.
DEBUG (50): btrpkt->n1= 8.
DEBUG (50): btrpkt->n2= 100.
DEBUG (50): btrpkt->n3= 100.
DEBUG (50): btrpkt->n4= 100.
DEBUG (50): btrpkt->n5= 100.
DEBUG (50): btrpkt->n6= 100.
DEBUG (50): ws1= 4.
DEBUG (50): ws2= 4.
DEBUG (50): wa2= 0.675700.
DEBUG (50): wb2= 0.930300.
DEBUG (50): btrpkt->n1= 8.
DEBUG (50): btrpkt->n2= 100.
DEBUG (50): btrpkt->n3= 100.
DEBUG (50): btrpkt->n4= 100.
DEBUG (50): btrpkt->n5= 100.
DEBUG (50): btrpkt->n6= 100.
DEBUG (50): m= 0.675700.
DEBUG (50): n= 0.930388.
DEBUG (50): a2= 44282.
DEBUG (50): b2= 60967.
DEBUG (14): packet received from 15.
DEBUG (14): r152714= 0.
DEBUG (14): r1514= 0.
DEBUG (14): r2714= 0.
DEBUG (14): s14[0]= 0.000000.
DEBUG (14): s14[1]= 1.000000.
DEBUG (14): s14[2]= 0.000000.
DEBUG (14): s14[3]= 0.545500.
DEBUG (14): ws1= 4.
DEBUG (14): ws2= 4.
DEBUG (14): wa2= 0.409500.
DEBUG (14): wb2= 0.511400.
DEBUG (14): temppkt->n1= 7.
DEBUG (14): temppkt->n2= 5.
DEBUG (14): temppkt->n3= 100.
DEBUG (14): temppkt->n4= 100.
DEBUG (14): temppkt->n5= 100.
DEBUG (14): temppkt->n6= 100.
DEBUG (14): m15-14= 0.409598.
DEBUG (14): n15-14= 0.511498.
DEBUG (14): a15-14= 26836.
DEBUG (14): b15-14= 33514.
DEBUG (24): packet received from 35.
DEBUG (24): r253524= 0.
DEBUG (24): r2524= 0.
DEBUG (24): r3524= 0.
DEBUG (24): s24[0]= 0.511600.
DEBUG (24): s24[1]= 1.000000.
DEBUG (24): s24[2]= 0.000000.
DEBUG (24): s24[3]= 0.448300.
DEBUG (24): ws1= 4.
DEBUG (24): ws2= 4.
DEBUG (24): temppkt3= 4.
DEBUG (24): wa1= 2570.
DEBUG (24): wb1= 6780.
DEBUG (24): wa2= 0.257000.
DEBUG (24): wb2= 0.678000.
DEBUG (24): temppkt->n1= 9.
DEBUG (24): temppkt->n2= 9.
DEBUG (24): temppkt->n3= 4.
DEBUG (24): temppkt->n4= 100.
DEBUG (24): temppkt->n5= 100.
DEBUG (24): temppkt->n6= 100.
DEBUG (24): m35-24= 0.425788.
DEBUG (24): n35-24= 0.467837.
DEBUG (24): a35-24= 16842.
DEBUG (24): b35-24= 44432.
DEBUG (43): packet received from 44.
DEBUG (43): r334443= 0.
DEBUG (43): r3343= 0.
DEBUG (43): r4443= 0.
DEBUG (43): s43[0]= 0.561000.
DEBUG (43): s43[1]= 1.000000.
DEBUG (43): s43[2]= 0.000000.
DEBUG (43): s43[3]= 1.000000.
DEBUG (43): ws1= 4.
DEBUG (43): ws2= 5.
DEBUG (43): wa2= 0.998100.
DEBUG (43): wb2= 1.000000.
DEBUG (43): temppkt->n1= 100.
DEBUG (43): temppkt->n2= 100.
DEBUG (43): temppkt->n3= 100.
DEBUG (43): temppkt->n4= 100.
DEBUG (43): temppkt->n5= 100.
DEBUG (43): temppkt->n6= 100.
DEBUG (43): m44-43= 0.998199.
DEBUG (43): n44-43= 1.000000.
DEBUG (43): a44-43= 65410.
DEBUG (43): b44-43= 65535.
DEBUG (12): packet received from 13.
DEBUG (12): r132512= 0.
DEBUG (12): r1312= 0.
DEBUG (12): r2512= 0.
DEBUG (12): s12[0]= 0.000000.
DEBUG (12): s12[1]= 1.000000.
DEBUG (12): s12[2]= 0.000000.
DEBUG (12): s12[3]= 0.511600.
DEBUG (12): ws1= 4.
DEBUG (12): ws2= 4.
DEBUG (12): wa2= 0.289500.
DEBUG (12): wb2= 0.370300.
DEBUG (12): temppkt->n1= 7.
DEBUG (12): temppkt->n2= 100.
DEBUG (12): temppkt->n3= 100.
DEBUG (12): temppkt->n4= 100.
DEBUG (12): temppkt->n5= 100.
DEBUG (12): temppkt->n6= 100.
DEBUG (12): m13-12= 0.289586.
DEBUG (12): n13-12= 0.370398.
DEBUG (12): a13-12= 18972.
DEBUG (12): b13-12= 24267.
DEBUG (9): packet received from 43.
DEBUG (9): r439= 0.
DEBUG (9): ws1= 4.
DEBUG (9): ws2= 5.
DEBUG (9): wa2= 0.998000.
DEBUG (9): wb2= 1.000000.
DEBUG (9): temppkt->n1= 100.
DEBUG (9): temppkt->n2= 100.
DEBUG (9): temppkt->n3= 100.
DEBUG (9): temppkt->n4= 100.
DEBUG (9): temppkt->n5= 100.
DEBUG (9): temppkt->n6= 100.
DEBUG (9): m43-9= 0.998093.
DEBUG (9): n43-9= 1.000000.
DEBUG (9): a43-9= 65403.
DEBUG (9): b43-9= 65535.
DEBUG (21): packet received from 9.
DEBUG (21): r921= 0.
DEBUG (21): ws1= 4.
DEBUG (21): ws2= 5.
DEBUG (21): wa2= 0.999100.
DEBUG (21): wb2= 1.000000.
DEBUG (21): temppkt->n1= 100.
DEBUG (21): temppkt->n2= 100.
DEBUG (21): temppkt->n3= 100.
DEBUG (21): temppkt->n4= 100.
DEBUG (21): temppkt->n5= 100.
DEBUG (21): temppkt->n6= 100.
DEBUG (21): m9-21= 0.999153.
DEBUG (21): n9-21= 1.000000.
DEBUG (21): a9-21= 65476.
DEBUG (21): b9-21= 65535.
DEBUG (6): packet received from 9.
DEBUG (6): r96= 0.
DEBUG (6): ws1= 4.
DEBUG (6): ws2= 4.
DEBUG (6): temppkt1= 9.
DEBUG (6): wa1= 9840.
DEBUG (6): wb1= 9910.
DEBUG (6): temppkt2= 9.
DEBUG (6): wa1= 8400.
DEBUG (6): wb1= 9100.
DEBUG (6): wa2= 0.840000.
DEBUG (6): wb2= 0.910000.
DEBUG (6): temppkt->n1= 9.
DEBUG (6): temppkt->n2= 9.
DEBUG (6): temppkt->n3= 100.
DEBUG (6): temppkt->n4= 100.
DEBUG (6): temppkt->n5= 100.
DEBUG (6): temppkt->n6= 100.
DEBUG (6): m9-6= 0.998453.
DEBUG (6): n9-6= 0.999153.
DEBUG (6): a9-6= 55049.
DEBUG (6): b9-6= 59636.
DEBUG (5): packet received from 9.
DEBUG (5): r895= 0.
DEBUG (5): r85= 0.
DEBUG (5): r95= 0.
DEBUG (5): s5[0]= 0.409100.
DEBUG (5): s5[1]= 1.000000.
DEBUG (5): s5[2]= 0.000000.
DEBUG (5): s5[3]= 0.231900.
DEBUG (5): ws1= 4.
DEBUG (5): ws2= 4.
DEBUG (5): temppkt1= 9.
DEBUG (5): wa1= 9790.
DEBUG (5): wb1= 9840.
DEBUG (5): temppkt2= 9.
DEBUG (5): wa1= 7900.
DEBUG (5): wb1= 8400.
DEBUG (5): wa2= 0.790000.
DEBUG (5): wb2= 0.840000.
DEBUG (5): temppkt->n1= 9.
DEBUG (5): temppkt->n2= 9.
DEBUG (5): temppkt->n3= 100.
DEBUG (5): temppkt->n4= 100.
DEBUG (5): temppkt->n5= 100.
DEBUG (5): temppkt->n6= 100.
DEBUG (5): m9-5= 0.997986.
DEBUG (5): n9-5= 0.998453.
DEBUG (5): a9-5= 51772.
DEBUG (5): b9-5= 55049.
DEBUG (12): packet received from 25.
DEBUG (12): r132512= 0.
DEBUG (12): r1312= 0.
DEBUG (12): r2512= 0.
DEBUG (12): s12[0]= 0.000000.
DEBUG (12): s12[1]= 1.000000.
DEBUG (12): s12[2]= 0.000000.
DEBUG (12): s12[3]= 0.511600.
DEBUG (12): ws1= 4.
DEBUG (12): ws2= 4.
DEBUG (12): temppkt3= 3.
DEBUG (12): wa1= 2670.
DEBUG (12): wb1= 7740.
DEBUG (12): wa2= 0.267000.
DEBUG (12): wb2= 0.774000.
DEBUG (12): temppkt->n1= 9.
DEBUG (12): temppkt->n2= 9.
DEBUG (12): temppkt->n3= 3.
DEBUG (12): temppkt->n4= 100.
DEBUG (12): temppkt->n5= 100.
DEBUG (12): temppkt->n6= 100.
DEBUG (12): m25-12= 0.326787.
DEBUG (12): n25-12= 0.377436.
DEBUG (12): a25-12= 17497.
DEBUG (12): b25-12= 50724.
DEBUG (24): packet received from 25.
DEBUG (24): r253524= 0.
DEBUG (24): r2524= 0.
DEBUG (24): r3524= 0.
DEBUG (24): s24[0]= 0.511600.
DEBUG (24): s24[1]= 1.000000.
DEBUG (24): s24[2]= 0.000000.
DEBUG (24): s24[3]= 0.448300.
DEBUG (24): ws1= 4.
DEBUG (24): ws2= 4.
DEBUG (24): wa2= 0.377400.
DEBUG (24): wb2= 0.425700.
DEBUG (24): temppkt->n1= 9.
DEBUG (24): temppkt->n2= 9.
DEBUG (24): temppkt->n3= 100.
DEBUG (24): temppkt->n4= 100.
DEBUG (24): temppkt->n5= 100.
DEBUG (24): temppkt->n6= 100.
DEBUG (24): m25-24= 0.377436.
DEBUG (24): n25-24= 0.425788.
DEBUG (24): a25-24= 24732.
DEBUG (24): b25-24= 27898.
DEBUG (8): packet received from 21.
DEBUG (8): r218= 0.
DEBUG (8): ws1= 4.
DEBUG (8): ws2= 5.
DEBUG (8): wa2= 0.999000.
DEBUG (8): wb2= 1.000000.
DEBUG (8): temppkt->n1= 100.
DEBUG (8): temppkt->n2= 100.
DEBUG (8): temppkt->n3= 100.
DEBUG (8): temppkt->n4= 100.
DEBUG (8): temppkt->n5= 100.
DEBUG (8): temppkt->n6= 100.
DEBUG (8): m21-8= 0.999100.
DEBUG (8): n21-8= 1.000000.
DEBUG (8): a21-8= 65469.
DEBUG (8): b21-8= 65535.
DEBUG (11): packet received from 12.
DEBUG (11): r1211= 0.
DEBUG (11): ws1= 4.
DEBUG (11): ws2= 4.
DEBUG (11): wa2= 0.266900.
DEBUG (11): wb2= 0.773900.
DEBUG (11): temppkt->n1= 9.
DEBUG (11): temppkt->n2= 9.
DEBUG (11): temppkt->n3= 3.
DEBUG (11): temppkt->n4= 100.
DEBUG (11): temppkt->n5= 100.
DEBUG (11): temppkt->n6= 100.
DEBUG (11): m12-11= 0.266987.
DEBUG (11): n12-11= 0.773999.
DEBUG (11): a12-11= 17491.
DEBUG (11): b12-11= 50717.
DEBUG (4): packet received from 8.
DEBUG (4): r5784= 0.
DEBUG (4): r54= 0.
DEBUG (4): r74= 0.
DEBUG (4): r84= 0.
DEBUG (4): s4[0]= 0.000000.
DEBUG (4): s4[1]= 1.000000.
DEBUG (4): s4[2]= 0.548400.
DEBUG (4): s4[3]= 1.000000.
DEBUG (4): s4[4]= 0.000000.
DEBUG (4): s4[5]= 0.409100.
DEBUG (4): ws1= 4.
DEBUG (4): ws2= 4.
DEBUG (4): temppkt1= 9.
DEBUG (4): wa1= 9890.
DEBUG (4): wb1= 9940.
DEBUG (4): temppkt2= 9.
DEBUG (4): wa1= 8900.
DEBUG (4): wb1= 9400.
DEBUG (4): wa2= 0.890000.
DEBUG (4): wb2= 0.940000.
DEBUG (4): temppkt->n1= 9.
DEBUG (4): temppkt->n2= 9.
DEBUG (4): temppkt->n3= 100.
DEBUG (4): temppkt->n4= 100.
DEBUG (4): temppkt->n5= 100.
DEBUG (4): temppkt->n6= 100.
DEBUG (4): m8-4= 0.998993.
DEBUG (4): n8-4= 0.999405.
DEBUG (4): a8-4= 58326.
DEBUG (4): b8-4= 61602.
DEBUG (5): packet received from 8.
DEBUG (5): r895= 0.
DEBUG (5): r85= 0.
DEBUG (5): r95= 0.
DEBUG (5): s5[0]= 0.409100.
DEBUG (5): s5[1]= 1.000000.
DEBUG (5): s5[2]= 0.000000.
DEBUG (5): s5[3]= 0.231900.
DEBUG (5): ws1= 4.
DEBUG (5): ws2= 5.
DEBUG (5): wa2= 0.999400.
DEBUG (5): wb2= 1.000000.
DEBUG (5): temppkt->n1= 100.
DEBUG (5): temppkt->n2= 100.
DEBUG (5): temppkt->n3= 100.
DEBUG (5): temppkt->n4= 100.
DEBUG (5): temppkt->n5= 100.
DEBUG (5): temppkt->n6= 100.
DEBUG (5): m8-5= 0.999405.
DEBUG (5): n8-5= 1.000000.
DEBUG (5): a8-5= 65495.
DEBUG (5): b8-5= 65535.
DEBUG (23): packet received from 24.
DEBUG (23): r2423= 0.
DEBUG (23): ws1= 4.
DEBUG (23): ws2= 4.
DEBUG (23): wa2= 0.377300.
DEBUG (23): wb2= 0.425600.
DEBUG (23): temppkt->n1= 9.
DEBUG (23): temppkt->n2= 9.
DEBUG (23): temppkt->n3= 100.
DEBUG (23): temppkt->n4= 100.
DEBUG (23): temppkt->n5= 100.
DEBUG (23): temppkt->n6= 100.
DEBUG (23): m24-23= 0.377386.
DEBUG (23): n24-23= 0.425696.
DEBUG (23): a24-23= 24726.
DEBUG (23): b24-23= 27891.
DEBUG (4): packet received from 5.
DEBUG (4): r5784= 0.
DEBUG (4): r54= 0.
DEBUG (4): r74= 0.
DEBUG (4): r84= 0.
DEBUG (4): s4[0]= 0.000000.
DEBUG (4): s4[1]= 1.000000.
DEBUG (4): s4[2]= 0.548400.
DEBUG (4): s4[3]= 1.000000.
DEBUG (4): s4[4]= 0.000000.
DEBUG (4): s4[5]= 0.409100.
DEBUG (4): ws1= 4.
DEBUG (4): ws2= 5.
DEBUG (4): wa2= 0.999300.
DEBUG (4): wb2= 1.000000.
DEBUG (4): temppkt->n1= 100.
DEBUG (4): temppkt->n2= 100.
DEBUG (4): temppkt->n3= 100.
DEBUG (4): temppkt->n4= 100.
DEBUG (4): temppkt->n5= 100.
DEBUG (4): temppkt->n6= 100.
DEBUG (4): m5-4= 0.999390.
DEBUG (4): n5-4= 1.000000.
DEBUG (4): a5-4= 65489.
DEBUG (4): b5-4= 65535.
DEBUG (10): packet received from 11.
DEBUG (10): r112310= 0.
DEBUG (10): r1110= 0.
DEBUG (10): r2310= 0.
DEBUG (10): s10[0]= 0.000000.
DEBUG (10): s10[1]= 1.000000.
DEBUG (10): s10[2]= 0.000000.
DEBUG (10): s10[3]= 0.485700.
DEBUG (10): ws1= 4.
DEBUG (10): ws2= 4.
DEBUG (10): wa2= 0.266800.
DEBUG (10): wb2= 0.773800.
DEBUG (10): temppkt->n1= 9.
DEBUG (10): temppkt->n2= 9.
DEBUG (10): temppkt->n3= 3.
DEBUG (10): temppkt->n4= 100.
DEBUG (10): temppkt->n5= 100.
DEBUG (10): temppkt->n6= 100.
DEBUG (10): m11-10= 0.266896.
DEBUG (10): n11-10= 0.773892.
DEBUG (10): a11-10= 17484.
DEBUG (10): b11-10= 50710.
DEBUG (22): packet received from 23.
DEBUG (22): r233322= 0.
DEBUG (22): r2322= 0.
DEBUG (22): r3322= 0.
DEBUG (22): s22[0]= 0.485700.
DEBUG (22): s22[1]= 1.000000.
DEBUG (22): s22[2]= 0.000000.
DEBUG (22): s22[3]= 0.561000.
DEBUG (22): ws1= 4.
DEBUG (22): ws2= 4.
DEBUG (22): temppkt3= 4.
DEBUG (22): wa1= 70.
DEBUG (22): wb1= 2550.
DEBUG (22): wa2= 0.007000.
DEBUG (22): wb2= 0.255000.
DEBUG (22): temppkt->n1= 9.
DEBUG (22): temppkt->n2= 9.
DEBUG (22): temppkt->n3= 4.
DEBUG (22): temppkt->n4= 100.
DEBUG (22): temppkt->n5= 100.
DEBUG (22): temppkt->n6= 100.
DEBUG (22): m23-22= 0.400751.
DEBUG (22): n23-22= 0.425589.
DEBUG (22): a23-22= 458.
DEBUG (22): b23-22= 16711.
DEBUG (10): packet received from 23.
DEBUG (10): r112310= 0.
DEBUG (10): r1110= 0.
DEBUG (10): r2310= 0.
DEBUG (10): s10[0]= 0.000000.
DEBUG (10): s10[1]= 1.000000.
DEBUG (10): s10[2]= 0.000000.
DEBUG (10): s10[3]= 0.485700.
DEBUG (10): ws1= 4.
DEBUG (10): ws2= 4.
DEBUG (10): wa2= 0.377200.
DEBUG (10): wb2= 0.400700.
DEBUG (10): temppkt->n1= 9.
DEBUG (10): temppkt->n2= 9.
DEBUG (10): temppkt->n3= 100.
DEBUG (10): temppkt->n4= 100.
DEBUG (10): temppkt->n5= 100.
DEBUG (10): temppkt->n6= 100.
DEBUG (10): m23-10= 0.377295.
DEBUG (10): n23-10= 0.400751.
DEBUG (10): a23-10= 24719.
DEBUG (10): b23-10= 26259.
DEBUG (1): packet received from 4.
DEBUG (1): r341= 0.
DEBUG (1): r31= 0.
DEBUG (1): r41= 0.
DEBUG (1): s1[0]= 0.000000.
DEBUG (1): s1[1]= 1.000000.
DEBUG (1): s1[2]= 0.000000.
DEBUG (1): s1[3]= 1.000000.
DEBUG (1): ws1= 4.
DEBUG (1): ws2= 5.
DEBUG (1): wa2= 0.999200.
DEBUG (1): wb2= 1.000000.
DEBUG (1): temppkt->n1= 100.
DEBUG (1): temppkt->n2= 100.
DEBUG (1): temppkt->n3= 100.
DEBUG (1): temppkt->n4= 100.
DEBUG (1): temppkt->n5= 100.
DEBUG (1): temppkt->n6= 100.
DEBUG (1): m4-1= 0.999298.
DEBUG (1): n4-1= 1.000000.
DEBUG (1): a4-1= 65482.
DEBUG (1): b4-1= 65535.
DEBUG (50): packet received from 1.
DEBUG (50): sourceid= 49.
DEBUG (50): r1250= 0.
DEBUG (50): r150= 0.
DEBUG (50): r250= 0.
DEBUG (50): s50[0]= 0.000000.
DEBUG (50): s50[1]= 1.000000.
DEBUG (50): s50[2]= 0.000000.
DEBUG (50): s50[3]= 1.000000.
DEBUG (50): a1= 65482.
DEBUG (50): b1= 65535.
DEBUG (50): btrpkt->n1= 100.
DEBUG (50): btrpkt->n2= 100.
DEBUG (50): btrpkt->n3= 100.
DEBUG (50): btrpkt->n4= 100.
DEBUG (50): btrpkt->n5= 100.
DEBUG (50): btrpkt->n6= 100.
DEBUG (50): ws1= 4.
DEBUG (50): ws2= 5.
DEBUG (50): wa2= 0.999100.
DEBUG (50): wb2= 1.000000.
DEBUG (50): btrpkt->n1= 100.
DEBUG (50): btrpkt->n2= 100.
DEBUG (50): btrpkt->n3= 100.
DEBUG (50): btrpkt->n4= 100.
DEBUG (50): btrpkt->n5= 100.
DEBUG (50): btrpkt->n6= 100.
DEBUG (50): m= 0.999191.
DEBUG (50): n= 1.000000.
DEBUG (50): a2= 65476.
DEBUG (50): b2= 65535.
DEBUG (1): count is 5.
DEBUG (1): **************************.
DEBUG (2): count is 5.
DEBUG (2): **************************.
DEBUG (3): count is 5.
DEBUG (3): **************************.
DEBUG (4): count is 5.
DEBUG (4): **************************.
DEBUG (5): count is 5.
DEBUG (5): **************************.
DEBUG (6): count is 5.
DEBUG (6): **************************.
DEBUG (7): count is 5.
DEBUG (7): **************************.
DEBUG (8): count is 5.
DEBUG (8): **************************.
DEBUG (9): count is 5.
DEBUG (9): **************************.
DEBUG (10): count is 5.
DEBUG (10): **************************.
DEBUG (11): count is 5.
DEBUG (11): **************************.
DEBUG (12): count is 5.
DEBUG (12): **************************.
DEBUG (13): count is 5.
DEBUG (13): **************************.
DEBUG (14): count is 5.
DEBUG (14): **************************.
DEBUG (15): count is 5.
DEBUG (15): **************************.
DEBUG (16): count is 5.
DEBUG (16): **************************.
DEBUG (17): count is 5.
DEBUG (17): **************************.
DEBUG (18): count is 5.
DEBUG (18): **************************.
DEBUG (19): count is 5.
DEBUG (19): **************************.
DEBUG (20): count is 5.
DEBUG (20): **************************.
DEBUG (21): count is 5.
DEBUG (21): **************************.
DEBUG (22): count is 5.
DEBUG (22): **************************.
DEBUG (23): count is 5.
DEBUG (23): **************************.
DEBUG (24): count is 5.
DEBUG (24): **************************.
DEBUG (25): count is 5.
DEBUG (25): **************************.
DEBUG (26): count is 5.
DEBUG (26): **************************.
DEBUG (27): count is 5.
DEBUG (27): **************************.
DEBUG (28): count is 5.
DEBUG (28): **************************.
DEBUG (29): count is 5.
DEBUG (29): **************************.
DEBUG (30): count is 5.
DEBUG (30): **************************.
DEBUG (31): count is 5.
DEBUG (31): **************************.
DEBUG (32): count is 5.
DEBUG (32): **************************.
DEBUG (33): count is 5.
DEBUG (33): **************************.
DEBUG (34): count is 5.
DEBUG (34): **************************.
DEBUG (35): count is 5.
DEBUG (35): **************************.
DEBUG (36): count is 5.
DEBUG (36): **************************.
DEBUG (37): count is 5.
DEBUG (37): **************************.
DEBUG (38): count is 5.
DEBUG (38): **************************.
DEBUG (39): count is 5.
DEBUG (39): **************************.
DEBUG (40): count is 5.
DEBUG (40): **************************.
DEBUG (41): count is 5.
DEBUG (41): **************************.
DEBUG (42): count is 5.
DEBUG (42): **************************.
DEBUG (43): count is 5.
DEBUG (43): **************************.
DEBUG (44): count is 5.
DEBUG (44): **************************.
DEBUG (45): count is 5.
DEBUG (45): **************************.
DEBUG (46): count is 5.
DEBUG (46): **************************.
DEBUG (47): count is 5.
DEBUG (47): **************************.
DEBUG (48): count is 5.
DEBUG (48): **************************.
DEBUG (49): count is 5.
DEBUG (49): **************************.
DEBUG (50): count is 5.
DEBUG (50): **************************.
DEBUG (3): packet received from 7.
DEBUG (3): r73= 0.
DEBUG (3): ws1= 4.
DEBUG (3): ws2= 4.
DEBUG (3): temppkt1= 4.
DEBUG (3): wa1= 2410.
DEBUG (3): wb1= 7230.
DEBUG (3): wa2= 0.241000.
DEBUG (3): wb2= 0.723000.
DEBUG (3): a1= 0.
DEBUG (3): temppkt->n1= 4.
DEBUG (3): temppkt->n2= 100.
DEBUG (3): temppkt->n3= 100.
DEBUG (3): temppkt->n4= 100.
DEBUG (3): temppkt->n5= 100.
DEBUG (3): temppkt->n6= 100.
DEBUG (3): m7-3= 0.424186.
DEBUG (3): n7-3= 0.472335.
DEBUG (3): a7-3= 15793.
DEBUG (3): b7-3= 47381.
DEBUG (4): packet received from 7.
DEBUG (4): r5784= 0.
DEBUG (4): r54= 0.
DEBUG (4): r74= 0.
DEBUG (4): r84= 0.
DEBUG (4): s4[0]= 0.000000.
DEBUG (4): s4[1]= 1.000000.
DEBUG (4): s4[2]= 0.548400.
DEBUG (4): s4[3]= 1.000000.
DEBUG (4): s4[4]= 0.000000.
DEBUG (4): s4[5]= 0.409100.
DEBUG (4): ws1= 4.
DEBUG (4): ws2= 4.
DEBUG (4): wa2= 0.472300.
DEBUG (4): wb2= 0.511900.
DEBUG (4): temppkt->n1= 100.
DEBUG (4): temppkt->n2= 100.
DEBUG (4): temppkt->n3= 100.
DEBUG (4): temppkt->n4= 100.
DEBUG (4): temppkt->n5= 100.
DEBUG (4): temppkt->n6= 100.
DEBUG (4): m7-4= 0.472335.
DEBUG (4): n7-4= 0.511986.
DEBUG (4): a7-4= 30952.
DEBUG (4): b7-4= 33547.
DEBUG (17): packet received from 18.
DEBUG (17): r1817= 0.
DEBUG (17): ws1= 4.
DEBUG (17): ws2= 4.
DEBUG (17): temppkt1= 9.
DEBUG (17): wa1= 6410.
DEBUG (17): wb1= 7210.
DEBUG (17): wa2= 0.641000.
DEBUG (17): wb2= 0.721000.
DEBUG (17): a1= 0.
DEBUG (17): temppkt->n1= 9.
DEBUG (17): temppkt->n2= 100.
DEBUG (17): temppkt->n3= 100.
DEBUG (17): temppkt->n4= 100.
DEBUG (17): temppkt->n5= 100.
DEBUG (17): temppkt->n6= 100.
DEBUG (17): m18-17= 0.964187.
DEBUG (17): n18-17= 0.972198.
DEBUG (17): a18-17= 42007.
DEBUG (17): b18-17= 47250.
DEBUG (15): packet received from 16.
DEBUG (15): r1615= 0.
DEBUG (15): ws1= 4.
DEBUG (15): ws2= 4.
DEBUG (15): temppkt1= 9.
DEBUG (15): wa1= 2610.
DEBUG (15): wb1= 5930.
DEBUG (15): wa2= 0.261000.
DEBUG (15): wb2= 0.593000.
DEBUG (15): a1= 0.
DEBUG (15): temppkt->n1= 9.
DEBUG (15): temppkt->n2= 100.
DEBUG (15): temppkt->n3= 100.
DEBUG (15): temppkt->n4= 100.
DEBUG (15): temppkt->n5= 100.
DEBUG (15): temppkt->n6= 100.
DEBUG (15): m16-15= 0.926192.
DEBUG (15): n16-15= 0.959396.
DEBUG (15): a16-15= 17104.
DEBUG (15): b16-15= 38862.
DEBUG (43): packet received from 33.
DEBUG (43): r334443= 0.
DEBUG (43): r3343= 0.
DEBUG (43): r4443= 0.
DEBUG (43): s43[0]= 0.561000.
DEBUG (43): s43[1]= 1.000000.
DEBUG (43): s43[2]= 0.000000.
DEBUG (43): s43[3]= 1.000000.
DEBUG (43): ws1= 4.
DEBUG (43): ws2= 4.
DEBUG (43): temppkt1= 7.
DEBUG (43): wa1= 7050.
DEBUG (43): wb1= 5880.
DEBUG (43): wa2= 0.705000.
DEBUG (43): wb2= 0.588000.
DEBUG (43): a1= 0.
DEBUG (43): temppkt->n1= 7.
DEBUG (43): temppkt->n2= 100.
DEBUG (43): temppkt->n3= 100.
DEBUG (43): temppkt->n4= 100.
DEBUG (43): temppkt->n5= 100.
DEBUG (43): temppkt->n6= 100.
DEBUG (43): m33-43= 0.770509.
DEBUG (43): n33-43= 0.758892.
DEBUG (43): a33-43= 46202.
DEBUG (43): b33-43= 38534.
DEBUG (36): packet received from 37.
DEBUG (36): r374836= 0.
DEBUG (36): r3736= 0.
DEBUG (36): r4836= 0.
DEBUG (36): s36[0]= 0.513500.
DEBUG (36): s36[1]= 1.000000.
DEBUG (36): s36[2]= 0.000000.
DEBUG (36): s36[3]= 0.416700.
DEBUG (36): ws1= 4.
DEBUG (36): ws2= 4.
DEBUG (36): temppkt1= 8.
DEBUG (36): wa1= 5310.
DEBUG (36): wb1= 6070.
DEBUG (36): wa2= 0.531000.
DEBUG (36): wb2= 0.607000.
DEBUG (36): a1= 0.
DEBUG (36): temppkt->n1= 8.
DEBUG (36): temppkt->n2= 100.
DEBUG (36): temppkt->n3= 100.
DEBUG (36): temppkt->n4= 100.
DEBUG (36): temppkt->n5= 100.
DEBUG (36): temppkt->n6= 100.
DEBUG (36): m37-36= 0.853153.
DEBUG (36): n37-36= 0.860792.
DEBUG (36): a37-36= 34799.
DEBUG (36): b37-36= 39779.
DEBUG (1): packet received from 3.
DEBUG (1): r341= 0.
DEBUG (1): r31= 0.
DEBUG (1): r41= 0.
DEBUG (1): s1[0]= 0.000000.
DEBUG (1): s1[1]= 1.000000.
DEBUG (1): s1[2]= 0.000000.
DEBUG (1): s1[3]= 1.000000.
DEBUG (1): ws1= 4.
DEBUG (1): ws2= 4.
DEBUG (1): wa2= 0.240900.
DEBUG (1): wb2= 0.722900.
DEBUG (1): temppkt->n1= 4.
DEBUG (1): temppkt->n2= 100.
DEBUG (1): temppkt->n3= 100.
DEBUG (1): temppkt->n4= 100.
DEBUG (1): temppkt->n5= 100.
DEBUG (1): temppkt->n6= 100.
DEBUG (1): m3-1= 0.240986.
DEBUG (1): n3-1= 0.722988.
DEBUG (1): a3-1= 15787.
DEBUG (1): b3-1= 47375.
DEBUG (14): packet received from 27.
DEBUG (14): r152714= 0.
DEBUG (14): r1514= 0.
DEBUG (14): r2714= 0.
DEBUG (14): s14[0]= 0.000000.
DEBUG (14): s14[1]= 1.000000.
DEBUG (14): s14[2]= 0.000000.
DEBUG (14): s14[3]= 0.545500.
DEBUG (14): ws1= 4.
DEBUG (14): ws2= 4.
DEBUG (14): temppkt1= 6.
DEBUG (14): wa1= 8260.
DEBUG (14): wb1= 9080.
DEBUG (14): wa2= 0.826000.
DEBUG (14): wb2= 0.908000.
DEBUG (14): a1= 0.
DEBUG (14): temppkt->n1= 6.
DEBUG (14): temppkt->n2= 100.
DEBUG (14): temppkt->n3= 100.
DEBUG (14): temppkt->n4= 100.
DEBUG (14): temppkt->n5= 100.
DEBUG (14): temppkt->n6= 100.
DEBUG (14): m27-14= 0.682689.
DEBUG (14): n27-14= 0.690821.
DEBUG (14): a27-14= 54131.
DEBUG (14): b27-14= 59505.
DEBUG (10): packet received from 11.
DEBUG (10): r112310= 0.
DEBUG (10): r1110= 0.
DEBUG (10): r2310= 0.
DEBUG (10): s10[0]= 0.000000.
DEBUG (10): s10[1]= 1.000000.
DEBUG (10): s10[2]= 0.000000.
DEBUG (10): s10[3]= 0.485700.
DEBUG (10): ws1= 4.
DEBUG (10): ws2= 4.
DEBUG (10): wa2= 0.689700.
DEBUG (10): wb2= 0.732300.
DEBUG (10): temppkt->n1= 100.
DEBUG (10): temppkt->n2= 100.
DEBUG (10): temppkt->n3= 100.
DEBUG (10): temppkt->n4= 100.
DEBUG (10): temppkt->n5= 100.
DEBUG (10): temppkt->n6= 100.
DEBUG (10): m11-10= 0.689799.
DEBUG (10): n11-10= 0.732387.
DEBUG (10): a11-10= 45199.
DEBUG (10): b11-10= 47991.
DEBUG (31): packet received from 32.
DEBUG (31): r3231= 0.
DEBUG (31): ws1= 4.
DEBUG (31): ws2= 4.
DEBUG (31): temppkt1= 7.
DEBUG (31): wa1= 5410.
DEBUG (31): wb1= 5880.
DEBUG (31): temppkt2= 5.
DEBUG (31): wa1= 4100.
DEBUG (31): wb1= 8800.
DEBUG (31): wa2= 0.410000.
DEBUG (31): wb2= 0.880000.
DEBUG (31): temppkt->n1= 7.
DEBUG (31): temppkt->n2= 5.
DEBUG (31): temppkt->n3= 100.
DEBUG (31): temppkt->n4= 100.
DEBUG (31): temppkt->n5= 100.
DEBUG (31): temppkt->n6= 100.
DEBUG (31): m32-31= 0.754149.
DEBUG (31): n32-31= 0.758892.
DEBUG (31): a32-31= 26869.
DEBUG (31): b32-31= 57670.
DEBUG (19): packet received from 32.
DEBUG (19): r203219= 0.
DEBUG (19): r2019= 0.
DEBUG (19): r3219= 0.
DEBUG (19): s19[0]= 0.000000.
DEBUG (19): s19[1]= 1.000000.
DEBUG (19): s19[2]= 0.000000.
DEBUG (19): s19[3]= 0.428600.
DEBUG (19): ws1= 4.
DEBUG (19): ws2= 4.
DEBUG (19): temppkt1= 7.
DEBUG (19): wa1= 5050.
DEBUG (19): wb1= 5410.
DEBUG (19): temppkt2= 5.
DEBUG (19): wa1= 500.
DEBUG (19): wb1= 4100.
DEBUG (19): wa2= 0.050000.
DEBUG (19): wb2= 0.410000.
DEBUG (19): temppkt->n1= 7.
DEBUG (19): temppkt->n2= 5.
DEBUG (19): temppkt->n3= 100.
DEBUG (19): temppkt->n4= 100.
DEBUG (19): temppkt->n5= 100.
DEBUG (19): temppkt->n6= 100.
DEBUG (19): m32-19= 0.750591.
DEBUG (19): n32-19= 0.754149.
DEBUG (19): a32-19= 3276.
DEBUG (19): b32-19= 26869.
DEBUG (16): packet received from 17.
DEBUG (16): r172916= 0.
DEBUG (16): r1716= 0.
DEBUG (16): r2916= 0.
DEBUG (16): s16[0]= 0.000000.
DEBUG (16): s16[1]= 1.000000.
DEBUG (16): s16[2]= 0.000000.
DEBUG (16): s16[3]= 0.541700.
DEBUG (16): ws1= 4.
DEBUG (16): ws2= 4.
DEBUG (16): wa2= 0.640900.
DEBUG (16): wb2= 0.720900.
DEBUG (16): temppkt->n1= 9.
DEBUG (16): temppkt->n2= 100.
DEBUG (16): temppkt->n3= 100.
DEBUG (16): temppkt->n4= 100.
DEBUG (16): temppkt->n5= 100.
DEBUG (16): temppkt->n6= 100.
DEBUG (16): m17-16= 0.640986.
DEBUG (16): n17-16= 0.720989.
DEBUG (16): a17-16= 42001.
DEBUG (16): b17-16= 47244.
DEBUG (33): packet received from 34.
DEBUG (33): r3433= 0.
DEBUG (33): ws1= 4.
DEBUG (33): ws2= 4.
DEBUG (33): wa2= 0.779500.
DEBUG (33): wb2= 0.804400.
DEBUG (33): temppkt->n1= 100.
DEBUG (33): temppkt->n2= 100.
DEBUG (33): temppkt->n3= 100.
DEBUG (33): temppkt->n4= 100.
DEBUG (33): temppkt->n5= 100.
DEBUG (33): temppkt->n6= 100.
DEBUG (33): m34-33= 0.779599.
DEBUG (33): n34-33= 0.804486.
DEBUG (33): a34-33= 51084.
DEBUG (33): b34-33= 52716.
DEBUG (44): packet received from 45.
DEBUG (44): r4544= 0.
DEBUG (44): ws1= 4.
DEBUG (44): ws2= 4.
DEBUG (44): temppkt1= 9.
DEBUG (44): wa1= 4770.
DEBUG (44): wb1= 6100.
DEBUG (44): wa2= 0.477000.
DEBUG (44): wb2= 0.610000.
DEBUG (44): a1= 0.
DEBUG (44): temppkt->n1= 9.
DEBUG (44): temppkt->n2= 100.
DEBUG (44): temppkt->n3= 100.
DEBUG (44): temppkt->n4= 100.
DEBUG (44): temppkt->n5= 100.
DEBUG (44): temppkt->n6= 100.
DEBUG (44): m45-44= 0.947799.
DEBUG (44): n45-44= 0.961089.
DEBUG (44): a45-44= 31260.
DEBUG (44): b45-44= 39976.
DEBUG (47): packet received from 48.
DEBUG (47): r4847= 0.
DEBUG (47): ws1= 4.
DEBUG (47): ws2= 4.
DEBUG (47): temppkt1= 9.
DEBUG (47): wa1= 8780.
DEBUG (47): wb1= 9160.
DEBUG (47): wa2= 0.878000.
DEBUG (47): wb2= 0.916000.
DEBUG (47): a1= 0.
DEBUG (47): temppkt->n1= 9.
DEBUG (47): temppkt->n2= 100.
DEBUG (47): temppkt->n3= 100.
DEBUG (47): temppkt->n4= 100.
DEBUG (47): temppkt->n5= 100.
DEBUG (47): temppkt->n6= 100.
DEBUG (47): m48-47= 0.987845.
DEBUG (47): n48-47= 0.991699.
DEBUG (47): a48-47= 57539.
DEBUG (47): b48-47= 60030.
DEBUG (36): packet received from 48.
DEBUG (36): r374836= 0.
DEBUG (36): r3736= 0.
DEBUG (36): r4836= 0.
DEBUG (36): s36[0]= 0.513500.
DEBUG (36): s36[1]= 1.000000.
DEBUG (36): s36[2]= 0.000000.
DEBUG (36): s36[3]= 0.416700.
DEBUG (36): ws1= 4.
DEBUG (36): ws2= 4.
DEBUG (36): temppkt1= 9.
DEBUG (36): wa1= 8500.
DEBUG (36): wb1= 8780.
DEBUG (36): temppkt2= 8.
DEBUG (36): wa1= 5000.
DEBUG (36): wb1= 7800.
DEBUG (36): wa2= 0.500000.
DEBUG (36): wb2= 0.780000.
DEBUG (36): temppkt->n1= 9.
DEBUG (36): temppkt->n2= 8.
DEBUG (36): temppkt->n3= 100.
DEBUG (36): temppkt->n4= 100.
DEBUG (36): temppkt->n5= 100.
DEBUG (36): temppkt->n6= 100.
DEBUG (36): m48-36= 0.985092.
DEBUG (36): n48-36= 0.987845.
DEBUG (36): a48-36= 32767.
DEBUG (36): b48-36= 51117.
DEBUG (1): packet received from 4.
DEBUG (1): r341= 0.
DEBUG (1): r31= 0.
DEBUG (1): r41= 0.
DEBUG (1): s1[0]= 0.000000.
DEBUG (1): s1[1]= 1.000000.
DEBUG (1): s1[2]= 0.000000.
DEBUG (1): s1[3]= 1.000000.
DEBUG (1): ws1= 4.
DEBUG (1): ws2= 4.
DEBUG (1): wa2= 0.472200.
DEBUG (1): wb2= 0.511800.
DEBUG (1): temppkt->n1= 100.
DEBUG (1): temppkt->n2= 100.
DEBUG (1): temppkt->n3= 100.
DEBUG (1): temppkt->n4= 100.
DEBUG (1): temppkt->n5= 100.
DEBUG (1): temppkt->n6= 100.
DEBUG (1): m4-1= 0.472297.
DEBUG (1): n4-1= 0.511894.
DEBUG (1): a4-1= 30945.
DEBUG (1): b4-1= 33540.
DEBUG (12): packet received from 13.
DEBUG (12): r132512= 0.
DEBUG (12): r1312= 0.
DEBUG (12): r2512= 0.
DEBUG (12): s12[0]= 0.000000.
DEBUG (12): s12[1]= 1.000000.
DEBUG (12): s12[2]= 0.000000.
DEBUG (12): s12[3]= 0.511600.
DEBUG (12): ws1= 4.
DEBUG (12): ws2= 4.
DEBUG (12): wa2= 0.795300.
DEBUG (12): wb2= 0.836700.
DEBUG (12): temppkt->n1= 100.
DEBUG (12): temppkt->n2= 100.
DEBUG (12): temppkt->n3= 100.
DEBUG (12): temppkt->n4= 100.
DEBUG (12): temppkt->n5= 100.
DEBUG (12): temppkt->n6= 100.
DEBUG (12): m13-12= 0.795392.
DEBUG (12): n13-12= 0.836789.
DEBUG (12): a13-12= 52119.
DEBUG (12): b13-12= 54833.
DEBUG (23): packet received from 24.
DEBUG (23): r2423= 0.
DEBUG (23): ws1= 4.
DEBUG (23): ws2= 4.
DEBUG (23): temppkt1= 6.
DEBUG (23): wa1= 300.
DEBUG (23): wb1= 3120.
DEBUG (23): wa2= 0.030000.
DEBUG (23): wb2= 0.312000.
DEBUG (23): a1= 0.
DEBUG (23): temppkt->n1= 6.
DEBUG (23): temppkt->n2= 100.
DEBUG (23): temppkt->n3= 100.
DEBUG (23): temppkt->n4= 100.
DEBUG (23): temppkt->n5= 100.
DEBUG (23): temppkt->n6= 100.
DEBUG (23): m24-23= 0.603098.
DEBUG (23): n24-23= 0.631296.
DEBUG (23): a24-23= 1966.
DEBUG (23): b24-23= 20446.
DEBUG (50): packet received from 2.
DEBUG (50): sourceid= 2.
DEBUG (50): r1250= 0.
DEBUG (50): r150= 0.
DEBUG (50): r250= 0.
DEBUG (50): s50[0]= 0.000000.
DEBUG (50): s50[1]= 1.000000.
DEBUG (50): s50[2]= 0.000000.
DEBUG (50): s50[3]= 1.000000.
DEBUG (50): a1= 6409.
DEBUG (50): b1= 9122.
DEBUG (50): btrpkt->n1= 100.
DEBUG (50): btrpkt->n2= 100.
DEBUG (50): btrpkt->n3= 100.
DEBUG (50): btrpkt->n4= 100.
DEBUG (50): btrpkt->n5= 100.
DEBUG (50): btrpkt->n6= 100.
DEBUG (50): ws1= 3.
DEBUG (50): ws2= 4.
DEBUG (50): wa2= 0.097700.
DEBUG (50): wb2= 0.139100.
DEBUG (50): btrpkt->n1= 100.
DEBUG (50): btrpkt->n2= 100.
DEBUG (50): btrpkt->n3= 100.
DEBUG (50): btrpkt->n4= 100.
DEBUG (50): btrpkt->n5= 100.
DEBUG (50): btrpkt->n6= 100.
DEBUG (50): m= 0.097795.
DEBUG (50): n= 0.139193.
DEBUG (50): a2= 6402.
DEBUG (50): b2= 9115.
DEBUG (22): packet received from 33.
DEBUG (22): r233322= 0.
DEBUG (22): r2322= 0.
DEBUG (22): r3322= 0.
DEBUG (22): s22[0]= 0.485700.
DEBUG (22): s22[1]= 1.000000.
DEBUG (22): s22[2]= 0.000000.
DEBUG (22): s22[3]= 0.561000.
DEBUG (22): ws1= 4.
DEBUG (22): ws2= 4.
DEBUG (22): temppkt1= 7.
DEBUG (22): wa1= 7940.
DEBUG (22): wb1= 9340.
DEBUG (22): wa2= 0.794000.
DEBUG (22): wb2= 0.934000.
DEBUG (22): a1= 0.
DEBUG (22): temppkt->n1= 7.
DEBUG (22): temppkt->n2= 100.
DEBUG (22): temppkt->n3= 100.
DEBUG (22): temppkt->n4= 100.
DEBUG (22): temppkt->n5= 100.
DEBUG (22): temppkt->n6= 100.
DEBUG (22): m33-22= 0.779492.
DEBUG (22): n33-22= 0.793462.
DEBUG (22): a33-22= 52034.
DEBUG (22): b33-22= 61209.
DEBUG (30): packet received from 31.
DEBUG (30): r314130= 0.
DEBUG (30): r3130= 0.
DEBUG (30): r4130= 0.
DEBUG (30): s30[0]= 0.000000.
DEBUG (30): s30[1]= 0.400000.
DEBUG (30): s30[2]= 0.000000.
DEBUG (30): s30[3]= 0.473700.
DEBUG (30): ws1= 4.
DEBUG (30): ws2= 4.
DEBUG (30): wa2= 0.409900.
DEBUG (30): wb2= 0.597900.
DEBUG (30): temppkt->n1= 7.
DEBUG (30): temppkt->n2= 5.
DEBUG (30): temppkt->n3= 100.
DEBUG (30): temppkt->n4= 100.
DEBUG (30): temppkt->n5= 100.
DEBUG (30): temppkt->n6= 100.
DEBUG (30): m31-30= 0.409995.
DEBUG (30): n31-30= 0.597992.
DEBUG (30): a31-30= 26862.
DEBUG (30): b31-30= 39183.
DEBUG (19): packet received from 20.
DEBUG (19): r203219= 0.
DEBUG (19): r2019= 0.
DEBUG (19): r3219= 0.
DEBUG (19): s19[0]= 0.000000.
DEBUG (19): s19[1]= 1.000000.
DEBUG (19): s19[2]= 0.000000.
DEBUG (19): s19[3]= 0.428600.
DEBUG (19): ws1= 4.
DEBUG (19): ws2= 5.
DEBUG (19): wa2= 0.983100.
DEBUG (19): wb2= 1.000000.
DEBUG (19): temppkt->n1= 100.
DEBUG (19): temppkt->n2= 100.
DEBUG (19): temppkt->n3= 100.
DEBUG (19): temppkt->n4= 100.
DEBUG (19): temppkt->n5= 100.
DEBUG (19): temppkt->n6= 100.
DEBUG (19): m20-19= 0.983200.
DEBUG (19): n20-19= 1.000000.
DEBUG (19): a20-19= 64427.
DEBUG (19): b20-19= 65535.
DEBUG (15): packet received from 16.
DEBUG (15): r1615= 0.
DEBUG (15): ws1= 4.
DEBUG (15): ws2= 4.
DEBUG (15): wa2= 0.640800.
DEBUG (15): wb2= 0.720800.
DEBUG (15): temppkt->n1= 9.
DEBUG (15): temppkt->n2= 100.
DEBUG (15): temppkt->n3= 100.
DEBUG (15): temppkt->n4= 100.
DEBUG (15): temppkt->n5= 100.
DEBUG (15): temppkt->n6= 100.
DEBUG (15): m16-15= 0.640894.
DEBUG (15): n16-15= 0.720897.
DEBUG (15): a16-15= 41994.
DEBUG (15): b16-15= 47237.
DEBUG (24): packet received from 35.
DEBUG (24): r253524= 0.
DEBUG (24): r2524= 0.
DEBUG (24): r3524= 0.
DEBUG (24): s24[0]= 0.511600.
DEBUG (24): s24[1]= 1.000000.
DEBUG (24): s24[2]= 0.000000.
DEBUG (24): s24[3]= 0.448300.
DEBUG (24): ws1= 4.
DEBUG (24): ws2= 4.
DEBUG (24): temppkt1= 8.
DEBUG (24): wa1= 440.
DEBUG (24): wb1= 1220.
DEBUG (24): wa2= 0.044000.
DEBUG (24): wb2= 0.122000.
DEBUG (24): a1= 0.
DEBUG (24): temppkt->n1= 8.
DEBUG (24): temppkt->n2= 100.
DEBUG (24): temppkt->n3= 100.
DEBUG (24): temppkt->n4= 100.
DEBUG (24): temppkt->n5= 100.
DEBUG (24): temppkt->n6= 100.
DEBUG (24): m35-24= 0.804486.
DEBUG (24): n35-24= 0.812291.
DEBUG (24): a35-24= 2883.
DEBUG (24): b35-24= 7995.
DEBUG (4): packet received from 8.
DEBUG (4): r5784= 0.
DEBUG (4): r54= 0.
DEBUG (4): r74= 0.
DEBUG (4): r84= 0.
DEBUG (4): s4[0]= 0.000000.
DEBUG (4): s4[1]= 1.000000.
DEBUG (4): s4[2]= 0.548400.
DEBUG (4): s4[3]= 1.000000.
DEBUG (4): s4[4]= 0.000000.
DEBUG (4): s4[5]= 0.409100.
DEBUG (4): ws1= 4.
DEBUG (4): ws2= 4.
DEBUG (4): temppkt1= 5.
DEBUG (4): wa1= 1190.
DEBUG (4): wb1= 3030.
DEBUG (4): wa2= 0.119000.
DEBUG (4): wb2= 0.303000.
DEBUG (4): a1= 0.
DEBUG (4): temppkt->n1= 5.
DEBUG (4): temppkt->n2= 100.
DEBUG (4): temppkt->n3= 100.
DEBUG (4): temppkt->n4= 100.
DEBUG (4): temppkt->n5= 100.
DEBUG (4): temppkt->n6= 100.
DEBUG (4): m8-4= 0.511986.
DEBUG (4): n8-4= 0.530314.
DEBUG (4): a8-4= 7798.
DEBUG (4): b8-4= 19857.
DEBUG (41): packet received from 42.
DEBUG (41): r4241= 0.
DEBUG (41): ws1= 4.
DEBUG (41): ws2= 4.
DEBUG (41): wa2= 0.897200.
DEBUG (41): wb2= 0.905500.
DEBUG (41): temppkt->n1= 100.
DEBUG (41): temppkt->n2= 100.
DEBUG (41): temppkt->n3= 100.
DEBUG (41): temppkt->n4= 100.
DEBUG (41): temppkt->n5= 100.
DEBUG (41): temppkt->n6= 100.
DEBUG (41): m42-41= 0.897292.
DEBUG (41): n42-41= 0.905592.
DEBUG (41): a42-41= 58798.
DEBUG (41): b42-41= 59341.
DEBUG (25): packet received from 26.
DEBUG (25): r2625= 0.
DEBUG (25): ws1= 4.
DEBUG (25): ws2= 4.
DEBUG (25): temppkt1= 6.
DEBUG (25): wa1= 5440.
DEBUG (25): wb1= 8260.
DEBUG (25): wa2= 0.544000.
DEBUG (25): wb2= 0.826000.
DEBUG (25): a1= 0.
DEBUG (25): temppkt->n1= 6.
DEBUG (25): temppkt->n2= 100.
DEBUG (25): temppkt->n3= 100.
DEBUG (25): temppkt->n4= 100.
DEBUG (25): temppkt->n5= 100.
DEBUG (25): temppkt->n6= 100.
DEBUG (25): m26-25= 0.654490.
DEBUG (25): n26-25= 0.682689.
DEBUG (25): a26-25= 35651.
DEBUG (25): b26-25= 54131.
DEBUG (50): packet received from 1.
DEBUG (50): sourceid= 7.
DEBUG (50): r1250= 0.
DEBUG (50): r150= 0.
DEBUG (50): r250= 0.
DEBUG (50): s50[0]= 0.000000.
DEBUG (50): s50[1]= 1.000000.
DEBUG (50): s50[2]= 0.000000.
DEBUG (50): s50[3]= 1.000000.
DEBUG (50): a1= 30945.
DEBUG (50): b1= 33540.
DEBUG (50): btrpkt->n1= 100.
DEBUG (50): btrpkt->n2= 100.
DEBUG (50): btrpkt->n3= 100.
DEBUG (50): btrpkt->n4= 100.
DEBUG (50): btrpkt->n5= 100.
DEBUG (50): btrpkt->n6= 100.
DEBUG (50): ws1= 4.
DEBUG (50): ws2= 4.
DEBUG (50): wa2= 0.472100.
DEBUG (50): wb2= 0.511700.
DEBUG (50): btrpkt->n1= 100.
DEBUG (50): btrpkt->n2= 100.
DEBUG (50): btrpkt->n3= 100.
DEBUG (50): btrpkt->n4= 100.
DEBUG (50): btrpkt->n5= 100.
DEBUG (50): btrpkt->n6= 100.
DEBUG (50): m= 0.472190.
DEBUG (50): n= 0.511788.
DEBUG (50): a2= 30939.
DEBUG (50): b2= 33534.
DEBUG (28): packet received from 29.
DEBUG (28): r293928= 0.
DEBUG (28): r2928= 0.
DEBUG (28): r3928= 0.
DEBUG (28): s28[0]= 0.541700.
DEBUG (28): s28[1]= 1.000000.
DEBUG (28): s28[2]= 0.000000.
DEBUG (28): s28[3]= 0.464300.
DEBUG (28): ws1= 4.
DEBUG (28): ws2= 4.
DEBUG (28): temppkt1= 7.
DEBUG (28): wa1= 2370.
DEBUG (28): wb1= 2900.
DEBUG (28): temppkt2= 2.
DEBUG (28): wa1= 3700.
DEBUG (28): wb1= 9000.
DEBUG (28): wa2= 0.370000.
DEBUG (28): wb2= 0.900000.
DEBUG (28): temppkt->n1= 7.
DEBUG (28): temppkt->n2= 2.
DEBUG (28): temppkt->n3= 100.
DEBUG (28): temppkt->n4= 100.
DEBUG (28): temppkt->n5= 100.
DEBUG (28): temppkt->n6= 100.
DEBUG (28): m29-28= 0.723777.
DEBUG (28): n29-28= 0.729091.
DEBUG (28): a29-28= 24247.
DEBUG (28): b29-28= 58981.
DEBUG (21): packet received from 9.
DEBUG (21): r921= 0.
DEBUG (21): ws1= 4.
DEBUG (21): ws2= 4.
DEBUG (21): temppkt1= 5.
DEBUG (21): wa1= 7980.
DEBUG (21): wb1= 9650.
DEBUG (21): wa2= 0.798000.
DEBUG (21): wb2= 0.965000.
DEBUG (21): a1= 0.
DEBUG (21): temppkt->n1= 5.
DEBUG (21): temppkt->n2= 100.
DEBUG (21): temppkt->n3= 100.
DEBUG (21): temppkt->n4= 100.
DEBUG (21): temppkt->n5= 100.
DEBUG (21): temppkt->n6= 100.
DEBUG (21): m9-21= 0.579865.
DEBUG (21): n9-21= 0.596597.
DEBUG (21): a9-21= 52296.
DEBUG (21): b9-21= 63241.
DEBUG (6): packet received from 9.
DEBUG (6): r96= 0.
DEBUG (6): ws1= 4.
DEBUG (6): ws2= 4.
DEBUG (6): temppkt1= 5.
DEBUG (6): wa1= 6600.
DEBUG (6): wb1= 7980.
DEBUG (6): wa2= 0.660000.
DEBUG (6): wb2= 0.798000.
DEBUG (6): a1= 0.
DEBUG (6): temppkt->n1= 5.
DEBUG (6): temppkt->n2= 100.
DEBUG (6): temppkt->n3= 100.
DEBUG (6): temppkt->n4= 100.
DEBUG (6): temppkt->n5= 100.
DEBUG (6): temppkt->n6= 100.
DEBUG (6): m9-6= 0.566019.
DEBUG (6): n9-6= 0.579865.
DEBUG (6): a9-6= 43253.
DEBUG (6): b9-6= 52296.
DEBUG (14): packet received from 15.
DEBUG (14): r152714= 0.
DEBUG (14): r1514= 0.
DEBUG (14): r2714= 0.
DEBUG (14): s14[0]= 0.000000.
DEBUG (14): s14[1]= 1.000000.
DEBUG (14): s14[2]= 0.000000.
DEBUG (14): s14[3]= 0.545500.
DEBUG (14): ws1= 4.
DEBUG (14): ws2= 4.
DEBUG (14): wa2= 0.640700.
DEBUG (14): wb2= 0.720700.
DEBUG (14): temppkt->n1= 9.
DEBUG (14): temppkt->n2= 100.
DEBUG (14): temppkt->n3= 100.
DEBUG (14): temppkt->n4= 100.
DEBUG (14): temppkt->n5= 100.
DEBUG (14): temppkt->n6= 100.
DEBUG (14): m15-14= 0.640787.
DEBUG (14): n15-14= 0.720790.
DEBUG (14): a15-14= 41988.
DEBUG (14): b15-14= 47231.
DEBUG (48): packet received from 49.
DEBUG (48): r4948= 0.
DEBUG (48): ws1= 4.
DEBUG (48): ws2= 5.
DEBUG (48): wa2= 0.995200.
DEBUG (48): wb2= 1.000000.
DEBUG (48): temppkt->n1= 100.
DEBUG (48): temppkt->n2= 100.
DEBUG (48): temppkt->n3= 100.
DEBUG (48): temppkt->n4= 100.
DEBUG (48): temppkt->n5= 100.
DEBUG (48): temppkt->n6= 100.
DEBUG (48): m49-48= 0.995257.
DEBUG (48): n49-48= 1.000000.
DEBUG (48): a49-48= 65220.
DEBUG (48): b49-48= 65535.
DEBUG (22): packet received from 23.
DEBUG (22): r233322= 0.
DEBUG (22): r2322= 0.
DEBUG (22): r3322= 0.
DEBUG (22): s22[0]= 0.485700.
DEBUG (22): s22[1]= 1.000000.
DEBUG (22): s22[2]= 0.000000.
DEBUG (22): s22[3]= 0.561000.
DEBUG (22): ws1= 4.
DEBUG (22): ws2= 4.
DEBUG (22): wa2= 0.166900.
DEBUG (22): wb2= 0.311900.
DEBUG (22): temppkt->n1= 6.
DEBUG (22): temppkt->n2= 100.
DEBUG (22): temppkt->n3= 100.
DEBUG (22): temppkt->n4= 100.
DEBUG (22): temppkt->n5= 100.
DEBUG (22): temppkt->n6= 100.
DEBUG (22): m23-22= 0.166960.
DEBUG (22): n23-22= 0.311986.
DEBUG (22): a23-22= 10937.
DEBUG (22): b23-22= 20440.
DEBUG (7): packet received from 10.
DEBUG (7): r10227= 0.
DEBUG (7): r107= 0.
DEBUG (7): r227= 0.
DEBUG (7): s7[0]= 0.000000.
DEBUG (7): s7[1]= 1.000000.
DEBUG (7): s7[2]= 0.000000.
DEBUG (7): s7[3]= 1.000000.
DEBUG (7): ws1= 4.
DEBUG (7): ws2= 4.
DEBUG (7): wa2= 0.689600.
DEBUG (7): wb2= 0.732200.
DEBUG (7): temppkt->n1= 100.
DEBUG (7): temppkt->n2= 100.
DEBUG (7): temppkt->n3= 100.
DEBUG (7): temppkt->n4= 100.
DEBUG (7): temppkt->n5= 100.
DEBUG (7): temppkt->n6= 100.
DEBUG (7): m10-7= 0.689693.
DEBUG (7): n10-7= 0.732296.
DEBUG (7): a10-7= 45192.
DEBUG (7): b10-7= 47984.
DEBUG (35): packet received from 36.
DEBUG (35): r3635= 0.
DEBUG (35): ws1= 4.
DEBUG (35): ws2= 4.
DEBUG (35): wa2= 0.499900.
DEBUG (35): wb2= 0.779900.
DEBUG (35): temppkt->n1= 9.
DEBUG (35): temppkt->n2= 8.
DEBUG (35): temppkt->n3= 100.
DEBUG (35): temppkt->n4= 100.
DEBUG (35): temppkt->n5= 100.
DEBUG (35): temppkt->n6= 100.
DEBUG (35): m36-35= 0.499992.
DEBUG (35): n36-35= 0.779995.
DEBUG (35): a36-35= 32760.
DEBUG (35): b36-35= 51110.
DEBUG (24): packet received from 25.
DEBUG (24): r253524= 0.
DEBUG (24): r2524= 0.
DEBUG (24): r3524= 0.
DEBUG (24): s24[0]= 0.511600.
DEBUG (24): s24[1]= 1.000000.
DEBUG (24): s24[2]= 0.000000.
DEBUG (24): s24[3]= 0.448300.
DEBUG (24): ws1= 4.
DEBUG (24): ws2= 4.
DEBUG (24): wa2= 0.688200.
DEBUG (24): wb2= 0.825900.
DEBUG (24): temppkt->n1= 6.
DEBUG (24): temppkt->n2= 100.
DEBUG (24): temppkt->n3= 100.
DEBUG (24): temppkt->n4= 100.
DEBUG (24): temppkt->n5= 100.
DEBUG (24): temppkt->n6= 100.
DEBUG (24): m25-24= 0.688264.
DEBUG (24): n25-24= 0.825986.
DEBUG (24): a25-24= 45101.
DEBUG (24): b25-24= 54125.
DEBUG (46): packet received from 47.
DEBUG (46): r4746= 0.
DEBUG (46): ws1= 4.
DEBUG (46): ws2= 4.
DEBUG (46): wa2= 0.877900.
DEBUG (46): wb2= 0.915900.
DEBUG (46): temppkt->n1= 9.
DEBUG (46): temppkt->n2= 100.
DEBUG (46): temppkt->n3= 100.
DEBUG (46): temppkt->n4= 100.
DEBUG (46): temppkt->n5= 100.
DEBUG (46): temppkt->n6= 100.
DEBUG (46): m47-46= 0.877989.
DEBUG (46): n47-46= 0.915999.
DEBUG (46): a47-46= 57533.
DEBUG (46): b47-46= 60023.
DEBUG (28): packet received from 39.
DEBUG (28): r293928= 0.
DEBUG (28): r2928= 0.
DEBUG (28): r3928= 0.
DEBUG (28): s28[0]= 0.541700.
DEBUG (28): s28[1]= 1.000000.
DEBUG (28): s28[2]= 0.000000.
DEBUG (28): s28[3]= 0.464300.
DEBUG (28): ws1= 4.
DEBUG (28): ws2= 4.
DEBUG (28): temppkt1= 8.
DEBUG (28): wa1= 7310.
DEBUG (28): wb1= 7850.
DEBUG (28): temppkt2= 7.
DEBUG (28): wa1= 3100.
DEBUG (28): wb1= 8500.
DEBUG (28): wa2= 0.310000.
DEBUG (28): wb2= 0.850000.
DEBUG (28): temppkt->n1= 8.
DEBUG (28): temppkt->n2= 7.
DEBUG (28): temppkt->n3= 100.
DEBUG (28): temppkt->n4= 100.
DEBUG (28): temppkt->n5= 100.
DEBUG (28): temppkt->n6= 100.
DEBUG (28): m39-28= 0.873198.
DEBUG (28): n39-28= 0.878582.
DEBUG (28): a39-28= 20315.
DEBUG (28): b39-28= 55704.
DEBUG (38): packet received from 39.
DEBUG (38): r3938= 0.
DEBUG (38): ws1= 4.
DEBUG (38): ws2= 4.
DEBUG (38): temppkt1= 8.
DEBUG (38): wa1= 7850.
DEBUG (38): wb1= 8470.
DEBUG (38): wa2= 0.785000.
DEBUG (38): wb2= 0.847000.
DEBUG (38): a1= 0.
DEBUG (38): temppkt->n1= 8.
DEBUG (38): temppkt->n2= 100.
DEBUG (38): temppkt->n3= 100.
DEBUG (38): temppkt->n4= 100.
DEBUG (38): temppkt->n5= 100.
DEBUG (38): temppkt->n6= 100.
DEBUG (38): m39-38= 0.878582.
DEBUG (38): n39-38= 0.884794.
DEBUG (38): a39-38= 51444.
DEBUG (38): b39-38= 55508.
DEBUG (13): packet received from 14.
DEBUG (13): r1413= 0.
DEBUG (13): ws1= 4.
DEBUG (13): ws2= 4.
DEBUG (13): wa2= 0.640600.
DEBUG (13): wb2= 0.720600.
DEBUG (13): temppkt->n1= 9.
DEBUG (13): temppkt->n2= 100.
DEBUG (13): temppkt->n3= 100.
DEBUG (13): temppkt->n4= 100.
DEBUG (13): temppkt->n5= 100.
DEBUG (13): temppkt->n6= 100.
DEBUG (13): m14-13= 0.640696.
DEBUG (13): n14-13= 0.720699.
DEBUG (13): a14-13= 41981.
DEBUG (13): b14-13= 47224.
DEBUG (43): packet received from 44.
DEBUG (43): r334443= 0.
DEBUG (43): r3343= 0.
DEBUG (43): r4443= 0.
DEBUG (43): s43[0]= 0.561000.
DEBUG (43): s43[1]= 1.000000.
DEBUG (43): s43[2]= 0.000000.
DEBUG (43): s43[3]= 1.000000.
DEBUG (43): ws1= 4.
DEBUG (43): ws2= 4.
DEBUG (43): wa2= 0.476900.
DEBUG (43): wb2= 0.609900.
DEBUG (43): temppkt->n1= 9.
DEBUG (43): temppkt->n2= 100.
DEBUG (43): temppkt->n3= 100.
DEBUG (43): temppkt->n4= 100.
DEBUG (43): temppkt->n5= 100.
DEBUG (43): temppkt->n6= 100.
DEBUG (43): m44-43= 0.476997.
DEBUG (43): n44-43= 0.609995.
DEBUG (43): a44-43= 31253.
DEBUG (43): b44-43= 39969.
DEBUG (4): packet received from 5.
DEBUG (4): r5784= 0.
DEBUG (4): r54= 0.
DEBUG (4): r74= 0.
DEBUG (4): r84= 0.
DEBUG (4): s4[0]= 0.000000.
DEBUG (4): s4[1]= 1.000000.
DEBUG (4): s4[2]= 0.548400.
DEBUG (4): s4[3]= 1.000000.
DEBUG (4): s4[4]= 0.000000.
DEBUG (4): s4[5]= 0.409100.
DEBUG (4): ws1= 4.
DEBUG (4): ws2= 4.
DEBUG (4): temppkt1= 3.
DEBUG (4): wa1= 1470.
DEBUG (4): wb1= 8430.
DEBUG (4): wa2= 0.147000.
DEBUG (4): wb2= 0.843000.
DEBUG (4): a1= 0.
DEBUG (4): temppkt->n1= 3.
DEBUG (4): temppkt->n2= 100.
DEBUG (4): temppkt->n3= 100.
DEBUG (4): temppkt->n4= 100.
DEBUG (4): temppkt->n5= 100.
DEBUG (4): temppkt->n6= 100.
DEBUG (4): m5-4= 0.314794.
DEBUG (4): n5-4= 0.384390.
DEBUG (4): a5-4= 9633.
DEBUG (4): b5-4= 55246.
DEBUG (11): packet received from 12.
DEBUG (11): r1211= 0.
DEBUG (11): ws1= 4.
DEBUG (11): ws2= 4.
DEBUG (11): wa2= 0.795200.
DEBUG (11): wb2= 0.836600.
DEBUG (11): temppkt->n1= 100.
DEBUG (11): temppkt->n2= 100.
DEBUG (11): temppkt->n3= 100.
DEBUG (11): temppkt->n4= 100.
DEBUG (11): temppkt->n5= 100.
DEBUG (11): temppkt->n6= 100.
DEBUG (11): m12-11= 0.795285.
DEBUG (11): n12-11= 0.836698.
DEBUG (11): a12-11= 52113.
DEBUG (11): b12-11= 54826.
DEBUG (18): packet received from 19.
DEBUG (18): r1918= 0.
DEBUG (18): ws1= 4.
DEBUG (18): ws2= 5.
DEBUG (18): wa2= 0.983000.
DEBUG (18): wb2= 1.000000.
DEBUG (18): temppkt->n1= 100.
DEBUG (18): temppkt->n2= 100.
DEBUG (18): temppkt->n3= 100.
DEBUG (18): temppkt->n4= 100.
DEBUG (18): temppkt->n5= 100.
DEBUG (18): temppkt->n6= 100.
DEBUG (18): m19-18= 0.983093.
DEBUG (18): n19-18= 1.000000.
DEBUG (18): a19-18= 64420.
DEBUG (18): b19-18= 65535.
DEBUG (23): packet received from 24.
DEBUG (23): r2423= 0.
DEBUG (23): ws1= 4.
DEBUG (23): ws2= 4.
DEBUG (23): wa2= 0.688100.
DEBUG (23): wb2= 0.825800.
DEBUG (23): temppkt->n1= 6.
DEBUG (23): temppkt->n2= 100.
DEBUG (23): temppkt->n3= 100.
DEBUG (23): temppkt->n4= 100.
DEBUG (23): temppkt->n5= 100.
DEBUG (23): temppkt->n6= 100.
DEBUG (23): m24-23= 0.688197.
DEBUG (23): n24-23= 0.825895.
DEBUG (23): a24-23= 45094.
DEBUG (23): b24-23= 54118.
DEBUG (40): packet received from 41.
DEBUG (40): r4140= 0.
DEBUG (40): ws1= 4.
DEBUG (40): ws2= 4.
DEBUG (40): temppkt1= 9.
DEBUG (40): wa1= 110.
DEBUG (40): wb1= 540.
DEBUG (40): temppkt2= 0.
DEBUG (40): wa1= 1100.
DEBUG (40): wb1= 5400.
DEBUG (40): wa2= 0.110000.
DEBUG (40): wb2= 0.540000.
DEBUG (40): temppkt->n1= 9.
DEBUG (40): temppkt->n2= 0.
DEBUG (40): temppkt->n3= 100.
DEBUG (40): temppkt->n4= 100.
DEBUG (40): temppkt->n5= 100.
DEBUG (40): temppkt->n6= 100.
DEBUG (40): m41-40= 0.901125.
DEBUG (40): n41-40= 0.905486.
DEBUG (40): a41-40= 7208.
DEBUG (40): b41-40= 35388.
DEBUG (2): packet received from 6.
DEBUG (2): r62= 0.
DEBUG (2): ws1= 4.
DEBUG (2): ws2= 4.
DEBUG (2): wa2= 0.659900.
DEBUG (2): wb2= 0.797900.
DEBUG (2): temppkt->n1= 5.
DEBUG (2): temppkt->n2= 100.
DEBUG (2): temppkt->n3= 100.
DEBUG (2): temppkt->n4= 100.
DEBUG (2): temppkt->n5= 100.
DEBUG (2): temppkt->n6= 100.
DEBUG (2): m6-2= 0.659998.
DEBUG (2): n6-2= 0.797986.
DEBUG (2): a6-2= 43246.
DEBUG (2): b6-2= 52290.
DEBUG (27): packet received from 28.
DEBUG (27): r2827= 0.
DEBUG (27): ws1= 4.
DEBUG (27): ws2= 4.
DEBUG (27): wa2= 0.309900.
DEBUG (27): wb2= 0.849900.
DEBUG (27): temppkt->n1= 8.
DEBUG (27): temppkt->n2= 7.
DEBUG (27): temppkt->n3= 100.
DEBUG (27): temppkt->n4= 100.
DEBUG (27): temppkt->n5= 100.
DEBUG (27): temppkt->n6= 100.
DEBUG (27): m28-27= 0.309987.
DEBUG (27): n28-27= 0.849989.
DEBUG (27): a28-27= 20309.
DEBUG (27): b28-27= 55698.
DEBUG (3): packet received from 7.
DEBUG (3): r73= 0.
DEBUG (3): ws1= 4.
DEBUG (3): ws2= 4.
DEBUG (3): wa2= 0.689500.
DEBUG (3): wb2= 0.712900.
DEBUG (3): temppkt->n1= 100.
DEBUG (3): temppkt->n2= 100.
DEBUG (3): temppkt->n3= 100.
DEBUG (3): temppkt->n4= 100.
DEBUG (3): temppkt->n5= 100.
DEBUG (3): temppkt->n6= 100.
DEBUG (3): m7-3= 0.689586.
DEBUG (3): n7-3= 0.712949.
DEBUG (3): a7-3= 45186.
DEBUG (3): b7-3= 46719.
DEBUG (4): packet received from 7.
DEBUG (4): r5784= 0.
DEBUG (4): r54= 0.
DEBUG (4): r74= 0.
DEBUG (4): r84= 0.
DEBUG (4): s4[0]= 0.000000.
DEBUG (4): s4[1]= 1.000000.
DEBUG (4): s4[2]= 0.548400.
DEBUG (4): s4[3]= 1.000000.
DEBUG (4): s4[4]= 0.000000.
DEBUG (4): s4[5]= 0.409100.
DEBUG (4): ws1= 4.
DEBUG (4): ws2= 4.
DEBUG (4): temppkt1= 7.
DEBUG (4): wa1= 1290.
DEBUG (4): wb1= 3210.
DEBUG (4): wa2= 0.129000.
DEBUG (4): wb2= 0.321000.
DEBUG (4): a1= 0.
DEBUG (4): temppkt->n1= 7.
DEBUG (4): temppkt->n2= 100.
DEBUG (4): temppkt->n3= 100.
DEBUG (4): temppkt->n4= 100.
DEBUG (4): temppkt->n5= 100.
DEBUG (4): temppkt->n6= 100.
DEBUG (4): m7-4= 0.712949.
DEBUG (4): n7-4= 0.732189.
DEBUG (4): a7-4= 8454.
DEBUG (4): b7-4= 21036.
DEBUG (10): packet received from 11.
DEBUG (10): r112310= 0.
DEBUG (10): r1110= 0.
DEBUG (10): r2310= 0.
DEBUG (10): s10[0]= 0.000000.
DEBUG (10): s10[1]= 1.000000.
DEBUG (10): s10[2]= 0.000000.
DEBUG (10): s10[3]= 0.485700.
DEBUG (10): ws1= 4.
DEBUG (10): ws2= 4.
DEBUG (10): wa2= 0.795100.
DEBUG (10): wb2= 0.836500.
DEBUG (10): temppkt->n1= 100.
DEBUG (10): temppkt->n2= 100.
DEBUG (10): temppkt->n3= 100.
DEBUG (10): temppkt->n4= 100.
DEBUG (10): temppkt->n5= 100.
DEBUG (10): temppkt->n6= 100.
DEBUG (10): m11-10= 0.795193.
DEBUG (10): n11-10= 0.836591.
DEBUG (10): a11-10= 52106.
DEBUG (10): b11-10= 54820.
DEBUG (34): packet received from 35.
DEBUG (34): r354634= 0.
DEBUG (34): r3534= 0.
DEBUG (34): r4634= 0.
DEBUG (34): s34[0]= 0.448300.
DEBUG (34): s34[1]= 1.000000.
DEBUG (34): s34[2]= 0.000000.
DEBUG (34): s34[3]= 0.466700.
DEBUG (34): ws1= 4.
DEBUG (34): ws2= 4.
DEBUG (34): wa2= 0.625400.
DEBUG (34): wb2= 0.779800.
DEBUG (34): temppkt->n1= 9.
DEBUG (34): temppkt->n2= 8.
DEBUG (34): temppkt->n3= 100.
DEBUG (34): temppkt->n4= 100.
DEBUG (34): temppkt->n5= 100.
DEBUG (34): temppkt->n6= 100.
DEBUG (34): m35-34= 0.625411.
DEBUG (34): n35-34= 0.779889.
DEBUG (34): a35-34= 40985.
DEBUG (34): b35-34= 51104.
DEBUG (24): packet received from 35.
DEBUG (24): r253524= 0.
DEBUG (24): r2524= 0.
DEBUG (24): r3524= 0.
DEBUG (24): s24[0]= 0.511600.
DEBUG (24): s24[1]= 1.000000.
DEBUG (24): s24[2]= 0.000000.
DEBUG (24): s24[3]= 0.448300.
DEBUG (24): ws1= 4.
DEBUG (24): ws2= 4.
DEBUG (24): wa2= 0.499800.
DEBUG (24): wb2= 0.625400.
DEBUG (24): temppkt->n1= 9.
DEBUG (24): temppkt->n2= 8.
DEBUG (24): temppkt->n3= 100.
DEBUG (24): temppkt->n4= 100.
DEBUG (24): temppkt->n5= 100.
DEBUG (24): temppkt->n6= 100.
DEBUG (24): m35-24= 0.499886.
DEBUG (24): n35-24= 0.625411.
DEBUG (24): a35-24= 32754.
DEBUG (24): b35-24= 40985.
DEBUG (37): packet received from 38.
DEBUG (37): r3837= 0.
DEBUG (37): ws1= 4.
DEBUG (37): ws2= 4.
DEBUG (37): wa2= 0.784900.
DEBUG (37): wb2= 0.846900.
DEBUG (37): temppkt->n1= 8.
DEBUG (37): temppkt->n2= 100.
DEBUG (37): temppkt->n3= 100.
DEBUG (37): temppkt->n4= 100.
DEBUG (37): temppkt->n5= 100.
DEBUG (37): temppkt->n6= 100.
DEBUG (37): m38-37= 0.784985.
DEBUG (37): n38-37= 0.846998.
DEBUG (37): a38-37= 51438.
DEBUG (37): b38-37= 55501.
DEBUG (39): packet received from 40.
DEBUG (39): r404939= 0.
DEBUG (39): r4039= 0.
DEBUG (39): r4939= 0.
DEBUG (39): s39[0]= 0.000000.
DEBUG (39): s39[1]= 1.000000.
DEBUG (39): s39[2]= 0.000000.
DEBUG (39): s39[3]= 0.428600.
DEBUG (39): ws1= 4.
DEBUG (39): ws2= 4.
DEBUG (39): wa2= 0.109900.
DEBUG (39): wb2= 0.539900.
DEBUG (39): temppkt->n1= 9.
DEBUG (39): temppkt->n2= 0.
DEBUG (39): temppkt->n3= 100.
DEBUG (39): temppkt->n4= 100.
DEBUG (39): temppkt->n5= 100.
DEBUG (39): temppkt->n6= 100.
DEBUG (39): m40-39= 0.109987.
DEBUG (39): n40-39= 0.539986.
DEBUG (39): a40-39= 7202.
DEBUG (39): b40-39= 35382.
DEBUG (14): packet received from 27.
DEBUG (14): r152714= 0.
DEBUG (14): r1514= 0.
DEBUG (14): r2714= 0.
DEBUG (14): s14[0]= 0.000000.
DEBUG (14): s14[1]= 1.000000.
DEBUG (14): s14[2]= 0.000000.
DEBUG (14): s14[3]= 0.545500.
DEBUG (14): ws1= 4.
DEBUG (14): ws2= 4.
DEBUG (14): wa2= 0.309800.
DEBUG (14): wb2= 0.604400.
DEBUG (14): temppkt->n1= 8.
DEBUG (14): temppkt->n2= 7.
DEBUG (14): temppkt->n3= 100.
DEBUG (14): temppkt->n4= 100.
DEBUG (14): temppkt->n5= 100.
DEBUG (14): temppkt->n6= 100.
DEBUG (14): m27-14= 0.309895.
DEBUG (14): n27-14= 0.604466.
DEBUG (14): a27-14= 20302.
DEBUG (14): b27-14= 39609.
DEBUG (26): packet received from 27.
DEBUG (26): r273726= 0.
DEBUG (26): r2726= 0.
DEBUG (26): r3726= 0.
DEBUG (26): s26[0]= 0.545500.
DEBUG (26): s26[1]= 1.000000.
DEBUG (26): s26[2]= 0.000000.
DEBUG (26): s26[3]= 0.513500.
DEBUG (26): ws1= 4.
DEBUG (26): ws2= 4.
DEBUG (26): wa2= 0.604400.
DEBUG (26): wb2= 0.849800.
DEBUG (26): temppkt->n1= 8.
DEBUG (26): temppkt->n2= 7.
DEBUG (26): temppkt->n3= 100.
DEBUG (26): temppkt->n4= 100.
DEBUG (26): temppkt->n5= 100.
DEBUG (26): temppkt->n6= 100.
DEBUG (26): m27-26= 0.604466.
DEBUG (26): n27-26= 0.849897.
DEBUG (26): a27-26= 39609.
DEBUG (26): b27-26= 55691.
DEBUG (34): packet received from 46.
DEBUG (34): r354634= 0.
DEBUG (34): r3534= 0.
DEBUG (34): r4634= 0.
DEBUG (34): s34[0]= 0.448300.
DEBUG (34): s34[1]= 1.000000.
DEBUG (34): s34[2]= 0.000000.
DEBUG (34): s34[3]= 0.466700.
DEBUG (34): ws1= 4.
DEBUG (34): ws2= 4.
DEBUG (34): temppkt2= 8.
DEBUG (34): wa1= 7780.
DEBUG (34): wb1= 9560.
DEBUG (34): wa2= 0.778000.
DEBUG (34): wb2= 0.956000.
DEBUG (34): temppkt->n1= 9.
DEBUG (34): temppkt->n2= 8.
DEBUG (34): temppkt->n3= 100.
DEBUG (34): temppkt->n4= 100.
DEBUG (34): temppkt->n5= 100.
DEBUG (34): temppkt->n6= 100.
DEBUG (34): m46-34= 0.877897.
DEBUG (34): n46-34= 0.895630.
DEBUG (34): a46-34= 50986.
DEBUG (34): b46-34= 62651.
DEBUG (45): packet received from 46.
DEBUG (45): r4645= 0.
DEBUG (45): ws1= 4.
DEBUG (45): ws2= 4.
DEBUG (45): wa2= 0.895600.
DEBUG (45): wb2= 0.915800.
DEBUG (45): temppkt->n1= 9.
DEBUG (45): temppkt->n2= 100.
DEBUG (45): temppkt->n3= 100.
DEBUG (45): temppkt->n4= 100.
DEBUG (45): temppkt->n5= 100.
DEBUG (45): temppkt->n6= 100.
DEBUG (45): m46-45= 0.895630.
DEBUG (45): n46-45= 0.915892.
DEBUG (45): a46-45= 58693.
DEBUG (45): b46-45= 60016.
DEBUG (12): packet received from 13.
DEBUG (12): r132512= 0.
DEBUG (12): r1312= 0.
DEBUG (12): r2512= 0.
DEBUG (12): s12[0]= 0.000000.
DEBUG (12): s12[1]= 1.000000.
DEBUG (12): s12[2]= 0.000000.
DEBUG (12): s12[3]= 0.511600.
DEBUG (12): ws1= 4.
DEBUG (12): ws2= 4.
DEBUG (12): wa2= 0.640500.
DEBUG (12): wb2= 0.720500.
DEBUG (12): temppkt->n1= 9.
DEBUG (12): temppkt->n2= 100.
DEBUG (12): temppkt->n3= 100.
DEBUG (12): temppkt->n4= 100.
DEBUG (12): temppkt->n5= 100.
DEBUG (12): temppkt->n6= 100.
DEBUG (12): m13-12= 0.640589.
DEBUG (12): n13-12= 0.720592.
DEBUG (12): a13-12= 41975.
DEBUG (12): b13-12= 47217.
DEBUG (47): packet received from 48.
DEBUG (47): r4847= 0.
DEBUG (47): ws1= 4.
DEBUG (47): ws2= 5.
DEBUG (47): wa2= 0.997100.
DEBUG (47): wb2= 1.000000.
DEBUG (47): temppkt->n1= 100.
DEBUG (47): temppkt->n2= 100.
DEBUG (47): temppkt->n3= 100.
DEBUG (47): temppkt->n4= 100.
DEBUG (47): temppkt->n5= 100.
DEBUG (47): temppkt->n6= 100.
DEBUG (47): m48-47= 0.997196.
DEBUG (47): n48-47= 1.000000.
DEBUG (47): a48-47= 65344.
DEBUG (47): b48-47= 65535.
DEBUG (17): packet received from 18.
DEBUG (17): r1817= 0.
DEBUG (17): ws1= 4.
DEBUG (17): ws2= 5.
DEBUG (17): wa2= 0.982900.
DEBUG (17): wb2= 1.000000.
DEBUG (17): temppkt->n1= 100.
DEBUG (17): temppkt->n2= 100.
DEBUG (17): temppkt->n3= 100.
DEBUG (17): temppkt->n4= 100.
DEBUG (17): temppkt->n5= 100.
DEBUG (17): temppkt->n6= 100.
DEBUG (17): m18-17= 0.982986.
DEBUG (17): n18-17= 1.000000.
DEBUG (17): a18-17= 64414.
DEBUG (17): b18-17= 65535.
DEBUG (9): packet received from 43.
DEBUG (9): r439= 0.
DEBUG (9): ws1= 4.
DEBUG (9): ws2= 4.
DEBUG (9): wa2= 0.476800.
DEBUG (9): wb2= 0.609800.
DEBUG (9): temppkt->n1= 9.
DEBUG (9): temppkt->n2= 100.
DEBUG (9): temppkt->n3= 100.
DEBUG (9): temppkt->n4= 100.
DEBUG (9): temppkt->n5= 100.
DEBUG (9): temppkt->n6= 100.
DEBUG (9): m43-9= 0.476890.
DEBUG (9): n43-9= 0.609888.
DEBUG (9): a43-9= 31247.
DEBUG (9): b43-9= 39963.
DEBUG (25): packet received from 26.
DEBUG (25): r2625= 0.
DEBUG (25): ws1= 4.
DEBUG (25): ws2= 4.
DEBUG (25): wa2= 0.604300.
DEBUG (25): wb2= 0.849700.
DEBUG (25): temppkt->n1= 8.
DEBUG (25): temppkt->n2= 7.
DEBUG (25): temppkt->n3= 100.
DEBUG (25): temppkt->n4= 100.
DEBUG (25): temppkt->n5= 100.
DEBUG (25): temppkt->n6= 100.
DEBUG (25): m26-25= 0.604395.
DEBUG (25): n26-25= 0.849790.
DEBUG (25): a26-25= 39602.
DEBUG (25): b26-25= 55685.
DEBUG (11): packet received from 12.
DEBUG (11): r1211= 0.
DEBUG (11): ws1= 4.
DEBUG (11): ws2= 4.
DEBUG (11): wa2= 0.640400.
DEBUG (11): wb2= 0.720400.
DEBUG (11): temppkt->n1= 9.
DEBUG (11): temppkt->n2= 100.
DEBUG (11): temppkt->n3= 100.
DEBUG (11): temppkt->n4= 100.
DEBUG (11): temppkt->n5= 100.
DEBUG (11): temppkt->n6= 100.
DEBUG (11): m12-11= 0.640497.
DEBUG (11): n12-11= 0.720485.
DEBUG (11): a12-11= 41968.
DEBUG (11): b12-11= 47211.
DEBUG (50): packet received from 2.
DEBUG (50): sourceid= 9.
DEBUG (50): r1250= 0.
DEBUG (50): r150= 0.
DEBUG (50): r250= 0.
DEBUG (50): s50[0]= 0.000000.
DEBUG (50): s50[1]= 1.000000.
DEBUG (50): s50[2]= 0.000000.
DEBUG (50): s50[3]= 1.000000.
DEBUG (50): a1= 43246.
DEBUG (50): b1= 52290.
DEBUG (50): btrpkt->n1= 5.
DEBUG (50): btrpkt->n2= 100.
DEBUG (50): btrpkt->n3= 100.
DEBUG (50): btrpkt->n4= 100.
DEBUG (50): btrpkt->n5= 100.
DEBUG (50): btrpkt->n6= 100.
DEBUG (50): ws1= 4.
DEBUG (50): ws2= 4.
DEBUG (50): wa2= 0.659800.
DEBUG (50): wb2= 0.797800.
DEBUG (50): btrpkt->n1= 5.
DEBUG (50): btrpkt->n2= 100.
DEBUG (50): btrpkt->n3= 100.
DEBUG (50): btrpkt->n4= 100.
DEBUG (50): btrpkt->n5= 100.
DEBUG (50): btrpkt->n6= 100.
DEBUG (50): m= 0.659892.
DEBUG (50): n= 0.797894.
DEBUG (50): a2= 43239.
DEBUG (50): b2= 52283.
DEBUG (10): packet received from 23.
DEBUG (10): r112310= 0.
DEBUG (10): r1110= 0.
DEBUG (10): r2310= 0.
DEBUG (10): s10[0]= 0.000000.
DEBUG (10): s10[1]= 1.000000.
DEBUG (10): s10[2]= 0.000000.
DEBUG (10): s10[3]= 0.485700.
DEBUG (10): ws1= 4.
DEBUG (10): ws2= 4.
DEBUG (10): wa2= 0.688000.
DEBUG (10): wb2= 0.754900.
DEBUG (10): temppkt->n1= 6.
DEBUG (10): temppkt->n2= 100.
DEBUG (10): temppkt->n3= 100.
DEBUG (10): temppkt->n4= 100.
DEBUG (10): temppkt->n5= 100.
DEBUG (10): temppkt->n6= 100.
DEBUG (10): m23-10= 0.688090.
DEBUG (10): n23-10= 0.754970.
DEBUG (10): a23-10= 45088.
DEBUG (10): b23-10= 49472.
DEBUG (22): packet received from 23.
DEBUG (22): r233322= 0.
DEBUG (22): r2322= 0.
DEBUG (22): r3322= 0.
DEBUG (22): s22[0]= 0.485700.
DEBUG (22): s22[1]= 1.000000.
DEBUG (22): s22[2]= 0.000000.
DEBUG (22): s22[3]= 0.561000.
DEBUG (22): ws1= 4.
DEBUG (22): ws2= 4.
DEBUG (22): wa2= 0.754900.
DEBUG (22): wb2= 0.825700.
DEBUG (22): temppkt->n1= 6.
DEBUG (22): temppkt->n2= 100.
DEBUG (22): temppkt->n3= 100.
DEBUG (22): temppkt->n4= 100.
DEBUG (22): temppkt->n5= 100.
DEBUG (22): temppkt->n6= 100.
DEBUG (22): m23-22= 0.754970.
DEBUG (22): n23-22= 0.825788.
DEBUG (22): a23-22= 49472.
DEBUG (22): b23-22= 54112.
DEBUG (1): packet received from 3.
DEBUG (1): r341= 0.
DEBUG (1): r31= 0.
DEBUG (1): r41= 0.
DEBUG (1): s1[0]= 0.000000.
DEBUG (1): s1[1]= 1.000000.
DEBUG (1): s1[2]= 0.000000.
DEBUG (1): s1[3]= 1.000000.
DEBUG (1): ws1= 4.
DEBUG (1): ws2= 4.
DEBUG (1): wa2= 0.689400.
DEBUG (1): wb2= 0.712800.
DEBUG (1): temppkt->n1= 100.
DEBUG (1): temppkt->n2= 100.
DEBUG (1): temppkt->n3= 100.
DEBUG (1): temppkt->n4= 100.
DEBUG (1): temppkt->n5= 100.
DEBUG (1): temppkt->n6= 100.
DEBUG (1): m3-1= 0.689494.
DEBUG (1): n3-1= 0.712886.
DEBUG (1): a3-1= 45179.
DEBUG (1): b3-1= 46713.
DEBUG (36): packet received from 37.
DEBUG (36): r374836= 0.
DEBUG (36): r3736= 0.
DEBUG (36): r4836= 0.
DEBUG (36): s36[0]= 0.513500.
DEBUG (36): s36[1]= 1.000000.
DEBUG (36): s36[2]= 0.000000.
DEBUG (36): s36[3]= 0.416700.
DEBUG (36): ws1= 4.
DEBUG (36): ws2= 4.
DEBUG (36): temppkt2= 8.
DEBUG (36): wa1= 1670.
DEBUG (36): wb1= 4680.
DEBUG (36): wa2= 0.167000.
DEBUG (36): wb2= 0.468000.
DEBUG (36): temppkt->n1= 8.
DEBUG (36): temppkt->n2= 8.
DEBUG (36): temppkt->n3= 100.
DEBUG (36): temppkt->n4= 100.
DEBUG (36): temppkt->n5= 100.
DEBUG (36): temppkt->n6= 100.
DEBUG (36): m37-36= 0.816729.
DEBUG (36): n37-36= 0.846891.
DEBUG (36): a37-36= 10944.
DEBUG (36): b37-36= 30670.
DEBUG (26): packet received from 37.
DEBUG (26): r273726= 0.
DEBUG (26): r2726= 0.
DEBUG (26): r3726= 0.
DEBUG (26): s26[0]= 0.545500.
DEBUG (26): s26[1]= 1.000000.
DEBUG (26): s26[2]= 0.000000.
DEBUG (26): s26[3]= 0.513500.
DEBUG (26): ws1= 4.
DEBUG (26): ws2= 4.
DEBUG (26): wa2= 0.784800.
DEBUG (26): wb2= 0.816700.
DEBUG (26): temppkt->n1= 8.
DEBUG (26): temppkt->n2= 100.
DEBUG (26): temppkt->n3= 100.
DEBUG (26): temppkt->n4= 100.
DEBUG (26): temppkt->n5= 100.
DEBUG (26): temppkt->n6= 100.
DEBUG (26): m37-26= 0.784894.
DEBUG (26): n37-26= 0.816729.
DEBUG (26): a37-26= 51431.
DEBUG (26): b37-26= 53522.
DEBUG (21): packet received from 9.
DEBUG (21): r921= 0.
DEBUG (21): ws1= 4.
DEBUG (21): ws2= 4.
DEBUG (21): wa2= 0.553800.
DEBUG (21): wb2= 0.609700.
DEBUG (21): temppkt->n1= 9.
DEBUG (21): temppkt->n2= 100.
DEBUG (21): temppkt->n3= 100.
DEBUG (21): temppkt->n4= 100.
DEBUG (21): temppkt->n5= 100.
DEBUG (21): temppkt->n6= 100.
DEBUG (21): m9-21= 0.553897.
DEBUG (21): n9-21= 0.609796.
DEBUG (21): a9-21= 36293.
DEBUG (21): b9-21= 39956.
DEBUG (6): packet received from 9.
DEBUG (6): r96= 0.
DEBUG (6): ws1= 4.
DEBUG (6): ws2= 4.
DEBUG (6): temppkt2= 5.
DEBUG (6): wa1= 760.
DEBUG (6): wb1= 5380.
DEBUG (6): wa2= 0.076000.
DEBUG (6): wb2= 0.538000.
DEBUG (6): temppkt->n1= 9.
DEBUG (6): temppkt->n2= 5.
DEBUG (6): temppkt->n3= 100.
DEBUG (6): temppkt->n4= 100.
DEBUG (6): temppkt->n5= 100.
DEBUG (6): temppkt->n6= 100.
DEBUG (6): m9-6= 0.507641.
DEBUG (6): n9-6= 0.553897.
DEBUG (6): a9-6= 4980.
DEBUG (6): b9-6= 35257.
DEBUG (5): packet received from 9.
DEBUG (5): r895= 0.
DEBUG (5): r85= 0.
DEBUG (5): r95= 0.
DEBUG (5): s5[0]= 0.409100.
DEBUG (5): s5[1]= 1.000000.
DEBUG (5): s5[2]= 0.000000.
DEBUG (5): s5[3]= 0.231900.
DEBUG (5): ws1= 4.
DEBUG (5): ws2= 4.
DEBUG (5): wa2= 0.476700.
DEBUG (5): wb2= 0.507600.
DEBUG (5): temppkt->n1= 9.
DEBUG (5): temppkt->n2= 100.
DEBUG (5): temppkt->n3= 100.
DEBUG (5): temppkt->n4= 100.
DEBUG (5): temppkt->n5= 100.
DEBUG (5): temppkt->n6= 100.
DEBUG (5): m9-5= 0.476799.
DEBUG (5): n9-5= 0.507641.
DEBUG (5): a9-5= 31240.
DEBUG (5): b9-5= 33265.
DEBUG (10): packet received from 11.
DEBUG (10): r112310= 0.
DEBUG (10): r1110= 0.
DEBUG (10): r2310= 0.
DEBUG (10): s10[0]= 0.000000.
DEBUG (10): s10[1]= 1.000000.
DEBUG (10): s10[2]= 0.000000.
DEBUG (10): s10[3]= 0.485700.
DEBUG (10): ws1= 4.
DEBUG (10): ws2= 4.
DEBUG (10): wa2= 0.640300.
DEBUG (10): wb2= 0.720300.
DEBUG (10): temppkt->n1= 9.
DEBUG (10): temppkt->n2= 100.
DEBUG (10): temppkt->n3= 100.
DEBUG (10): temppkt->n4= 100.
DEBUG (10): temppkt->n5= 100.
DEBUG (10): temppkt->n6= 100.
DEBUG (10): m11-10= 0.640391.
DEBUG (10): n11-10= 0.720394.
DEBUG (10): a11-10= 41962.
DEBUG (10): b11-10= 47204.
DEBUG (46): packet received from 47.
DEBUG (46): r4746= 0.
DEBUG (46): ws1= 4.
DEBUG (46): ws2= 5.
DEBUG (46): wa2= 0.997000.
DEBUG (46): wb2= 1.000000.
DEBUG (46): temppkt->n1= 100.
DEBUG (46): temppkt->n2= 100.
DEBUG (46): temppkt->n3= 100.
DEBUG (46): temppkt->n4= 100.
DEBUG (46): temppkt->n5= 100.
DEBUG (46): temppkt->n6= 100.
DEBUG (46): m47-46= 0.997086.
DEBUG (46): n47-46= 1.000000.
DEBUG (46): a47-46= 65338.
DEBUG (46): b47-46= 65535.
DEBUG (50): packet received from 1.
DEBUG (50): sourceid= 11.
DEBUG (50): r1250= 0.
DEBUG (50): r150= 0.
DEBUG (50): r250= 0.
DEBUG (50): s50[0]= 0.000000.
DEBUG (50): s50[1]= 1.000000.
DEBUG (50): s50[2]= 0.000000.
DEBUG (50): s50[3]= 1.000000.
DEBUG (50): a1= 45179.
DEBUG (50): b1= 46713.
DEBUG (50): btrpkt->n1= 100.
DEBUG (50): btrpkt->n2= 100.
DEBUG (50): btrpkt->n3= 100.
DEBUG (50): btrpkt->n4= 100.
DEBUG (50): btrpkt->n5= 100.
DEBUG (50): btrpkt->n6= 100.
DEBUG (50): ws1= 4.
DEBUG (50): ws2= 4.
DEBUG (50): wa2= 0.689300.
DEBUG (50): wb2= 0.712700.
DEBUG (50): btrpkt->n1= 100.
DEBUG (50): btrpkt->n2= 100.
DEBUG (50): btrpkt->n3= 100.
DEBUG (50): btrpkt->n4= 100.
DEBUG (50): btrpkt->n5= 100.
DEBUG (50): btrpkt->n6= 100.
DEBUG (50): m= 0.689387.
DEBUG (50): n= 0.712795.
DEBUG (50): a2= 45173.
DEBUG (50): b2= 46706.
DEBUG (33): packet received from 34.
DEBUG (33): r3433= 0.
DEBUG (33): ws1= 4.
DEBUG (33): ws2= 4.
DEBUG (33): wa2= 0.777900.
DEBUG (33): wb2= 0.955900.
DEBUG (33): temppkt->n1= 9.
DEBUG (33): temppkt->n2= 8.
DEBUG (33): temppkt->n3= 100.
DEBUG (33): temppkt->n4= 100.
DEBUG (33): temppkt->n5= 100.
DEBUG (33): temppkt->n6= 100.
DEBUG (33): m34-33= 0.777996.
DEBUG (33): n34-33= 0.955993.
DEBUG (33): a34-33= 50979.
DEBUG (33): b34-33= 62644.
DEBUG (28): packet received from 39.
DEBUG (28): r293928= 0.
DEBUG (28): r2928= 0.
DEBUG (28): r3928= 0.
DEBUG (28): s28[0]= 0.541700.
DEBUG (28): s28[1]= 1.000000.
DEBUG (28): s28[2]= 0.000000.
DEBUG (28): s28[3]= 0.464300.
DEBUG (28): ws1= 4.
DEBUG (28): ws2= 4.
DEBUG (28): wa2= 0.109800.
DEBUG (28): wb2= 0.309500.
DEBUG (28): temppkt->n1= 9.
DEBUG (28): temppkt->n2= 0.
DEBUG (28): temppkt->n3= 100.
DEBUG (28): temppkt->n4= 100.
DEBUG (28): temppkt->n5= 100.
DEBUG (28): temppkt->n6= 100.
DEBUG (28): m39-28= 0.109895.
DEBUG (28): n39-28= 0.309544.
DEBUG (28): a39-28= 7195.
DEBUG (28): b39-28= 20283.
DEBUG (38): packet received from 39.
DEBUG (38): r3938= 0.
DEBUG (38): ws1= 4.
DEBUG (38): ws2= 4.
DEBUG (38): wa2= 0.309500.
DEBUG (38): wb2= 0.539800.
DEBUG (38): temppkt->n1= 9.
DEBUG (38): temppkt->n2= 0.
DEBUG (38): temppkt->n3= 100.
DEBUG (38): temppkt->n4= 100.
DEBUG (38): temppkt->n5= 100.
DEBUG (38): temppkt->n6= 100.
DEBUG (38): m39-38= 0.309544.
DEBUG (38): n39-38= 0.539895.
DEBUG (38): a39-38= 20283.
DEBUG (38): b39-38= 35375.
DEBUG (44): packet received from 45.
DEBUG (44): r4544= 0.
DEBUG (44): ws1= 4.
DEBUG (44): ws2= 4.
DEBUG (44): wa2= 0.895500.
DEBUG (44): wb2= 0.915700.
DEBUG (44): temppkt->n1= 9.
DEBUG (44): temppkt->n2= 100.
DEBUG (44): temppkt->n3= 100.
DEBUG (44): temppkt->n4= 100.
DEBUG (44): temppkt->n5= 100.
DEBUG (44): temppkt->n6= 100.
DEBUG (44): m45-44= 0.895598.
DEBUG (44): n45-44= 0.915785.
DEBUG (44): a45-44= 58686.
DEBUG (44): b45-44= 60010.
DEBUG (24): packet received from 25.
DEBUG (24): r253524= 0.
DEBUG (24): r2524= 0.
DEBUG (24): r3524= 0.
DEBUG (24): s24[0]= 0.511600.
DEBUG (24): s24[1]= 1.000000.
DEBUG (24): s24[2]= 0.000000.
DEBUG (24): s24[3]= 0.448300.
DEBUG (24): ws1= 4.
DEBUG (24): ws2= 4.
DEBUG (24): wa2= 0.729800.
DEBUG (24): wb2= 0.849600.
DEBUG (24): temppkt->n1= 8.
DEBUG (24): temppkt->n2= 7.
DEBUG (24): temppkt->n3= 100.
DEBUG (24): temppkt->n4= 100.
DEBUG (24): temppkt->n5= 100.
DEBUG (24): temppkt->n6= 100.
DEBUG (24): m25-24= 0.729840.
DEBUG (24): n25-24= 0.849699.
DEBUG (24): a25-24= 47827.
DEBUG (24): b25-24= 55678.
DEBUG (12): packet received from 25.
DEBUG (12): r132512= 0.
DEBUG (12): r1312= 0.
DEBUG (12): r2512= 0.
DEBUG (12): s12[0]= 0.000000.
DEBUG (12): s12[1]= 1.000000.
DEBUG (12): s12[2]= 0.000000.
DEBUG (12): s12[3]= 0.511600.
DEBUG (12): ws1= 4.
DEBUG (12): ws2= 4.
DEBUG (12): wa2= 0.604200.
DEBUG (12): wb2= 0.729800.
DEBUG (12): temppkt->n1= 8.
DEBUG (12): temppkt->n2= 7.
DEBUG (12): temppkt->n3= 100.
DEBUG (12): temppkt->n4= 100.
DEBUG (12): temppkt->n5= 100.
DEBUG (12): temppkt->n6= 100.
DEBUG (12): m25-12= 0.604288.
DEBUG (12): n25-12= 0.729840.
DEBUG (12): a25-12= 39596.
DEBUG (12): b25-12= 47827.
DEBUG (16): packet received from 17.
DEBUG (16): r172916= 0.
DEBUG (16): r1716= 0.
DEBUG (16): r2916= 0.
DEBUG (16): s16[0]= 0.000000.
DEBUG (16): s16[1]= 1.000000.
DEBUG (16): s16[2]= 0.000000.
DEBUG (16): s16[3]= 0.541700.
DEBUG (16): ws1= 4.
DEBUG (16): ws2= 5.
DEBUG (16): wa2= 0.982800.
DEBUG (16): wb2= 1.000000.
DEBUG (16): temppkt->n1= 100.
DEBUG (16): temppkt->n2= 100.
DEBUG (16): temppkt->n3= 100.
DEBUG (16): temppkt->n4= 100.
DEBUG (16): temppkt->n5= 100.
DEBUG (16): temppkt->n6= 100.
DEBUG (16): m17-16= 0.982895.
DEBUG (16): n17-16= 1.000000.
DEBUG (16): a17-16= 64407.
DEBUG (16): b17-16= 65535.
DEBUG (4): packet received from 5.
DEBUG (4): r5784= 0.
DEBUG (4): r54= 0.
DEBUG (4): r74= 0.
DEBUG (4): r84= 0.
DEBUG (4): s4[0]= 0.000000.
DEBUG (4): s4[1]= 1.000000.
DEBUG (4): s4[2]= 0.548400.
DEBUG (4): s4[3]= 1.000000.
DEBUG (4): s4[4]= 0.000000.
DEBUG (4): s4[5]= 0.409100.
DEBUG (4): ws1= 4.
DEBUG (4): ws2= 4.
DEBUG (4): wa2= 0.476600.
DEBUG (4): wb2= 0.507500.
DEBUG (4): temppkt->n1= 9.
DEBUG (4): temppkt->n2= 100.
DEBUG (4): temppkt->n3= 100.
DEBUG (4): temppkt->n4= 100.
DEBUG (4): temppkt->n5= 100.
DEBUG (4): temppkt->n6= 100.
DEBUG (4): m5-4= 0.476692.
DEBUG (4): n5-4= 0.507591.
DEBUG (4): a5-4= 31233.
DEBUG (4): b5-4= 33259.
DEBUG (13): packet received from 14.
DEBUG (13): r1413= 0.
DEBUG (13): ws1= 4.
DEBUG (13): ws2= 4.
DEBUG (13): wa2= 0.309700.
DEBUG (13): wb2= 0.604300.
DEBUG (13): temppkt->n1= 8.
DEBUG (13): temppkt->n2= 7.
DEBUG (13): temppkt->n3= 100.
DEBUG (13): temppkt->n4= 100.
DEBUG (13): temppkt->n5= 100.
DEBUG (13): temppkt->n6= 100.
DEBUG (13): m14-13= 0.309789.
DEBUG (13): n14-13= 0.604395.
DEBUG (13): a14-13= 20296.
DEBUG (13): b14-13= 39602.
DEBUG (43): packet received from 44.
DEBUG (43): r334443= 0.
DEBUG (43): r3343= 0.
DEBUG (43): r4443= 0.
DEBUG (43): s43[0]= 0.561000.
DEBUG (43): s43[1]= 1.000000.
DEBUG (43): s43[2]= 0.000000.
DEBUG (43): s43[3]= 1.000000.
DEBUG (43): ws1= 4.
DEBUG (43): ws2= 4.
DEBUG (43): wa2= 0.895400.
DEBUG (43): wb2= 0.915600.
DEBUG (43): temppkt->n1= 9.
DEBUG (43): temppkt->n2= 100.
DEBUG (43): temppkt->n3= 100.
DEBUG (43): temppkt->n4= 100.
DEBUG (43): temppkt->n5= 100.
DEBUG (43): temppkt->n6= 100.
DEBUG (43): m44-43= 0.895491.
DEBUG (43): n44-43= 0.915694.
DEBUG (43): a44-43= 58680.
DEBUG (43): b44-43= 60003.
DEBUG (25): packet received from 26.
DEBUG (25): r2625= 0.
DEBUG (25): ws1= 4.
DEBUG (25): ws2= 4.
DEBUG (25): wa2= 0.784700.
DEBUG (25): wb2= 0.816600.
DEBUG (25): temppkt->n1= 8.
DEBUG (25): temppkt->n2= 100.
DEBUG (25): temppkt->n3= 100.
DEBUG (25): temppkt->n4= 100.
DEBUG (25): temppkt->n5= 100.
DEBUG (25): temppkt->n6= 100.
DEBUG (25): m26-25= 0.784787.
DEBUG (25): n26-25= 0.816693.
DEBUG (25): a26-25= 51425.
DEBUG (25): b26-25= 53515.
DEBUG (23): packet received from 24.
DEBUG (23): r2423= 0.
DEBUG (23): ws1= 4.
DEBUG (23): ws2= 4.
DEBUG (23): wa2= 0.729700.
DEBUG (23): wb2= 0.849500.
DEBUG (23): temppkt->n1= 8.
DEBUG (23): temppkt->n2= 7.
DEBUG (23): temppkt->n3= 100.
DEBUG (23): temppkt->n4= 100.
DEBUG (23): temppkt->n5= 100.
DEBUG (23): temppkt->n6= 100.
DEBUG (23): m24-23= 0.729793.
DEBUG (23): n24-23= 0.849592.
DEBUG (23): a24-23= 47820.
DEBUG (23): b24-23= 55671.
DEBUG (45): packet received from 46.
DEBUG (45): r4645= 0.
DEBUG (45): ws1= 4.
DEBUG (45): ws2= 5.
DEBUG (45): wa2= 0.998300.
DEBUG (45): wb2= 1.000000.
DEBUG (45): temppkt->n1= 100.
DEBUG (45): temppkt->n2= 100.
DEBUG (45): temppkt->n3= 100.
DEBUG (45): temppkt->n4= 100.
DEBUG (45): temppkt->n5= 100.
DEBUG (45): temppkt->n6= 100.
DEBUG (45): m46-45= 0.998397.
DEBUG (45): n46-45= 1.000000.
DEBUG (45): a46-45= 65423.
DEBUG (45): b46-45= 65535.
DEBUG (34): packet received from 46.
DEBUG (34): r354634= 0.
DEBUG (34): r3534= 0.
DEBUG (34): r4634= 0.
DEBUG (34): s34[0]= 0.448300.
DEBUG (34): s34[1]= 1.000000.
DEBUG (34): s34[2]= 0.000000.
DEBUG (34): s34[3]= 0.466700.
DEBUG (34): ws1= 4.
DEBUG (34): ws2= 4.
DEBUG (34): temppkt1= 9.
DEBUG (34): wa1= 9690.
DEBUG (34): wb1= 9830.
DEBUG (34): temppkt2= 9.
DEBUG (34): wa1= 6900.
DEBUG (34): wb1= 8300.
DEBUG (34): wa2= 0.690000.
DEBUG (34): wb2= 0.830000.
DEBUG (34): temppkt->n1= 9.
DEBUG (34): temppkt->n2= 9.
DEBUG (34): temppkt->n3= 100.
DEBUG (34): temppkt->n4= 100.
DEBUG (34): temppkt->n5= 100.
DEBUG (34): temppkt->n6= 100.
DEBUG (34): m46-34= 0.996994.
DEBUG (34): n46-34= 0.998397.
DEBUG (34): a46-34= 45219.
DEBUG (34): b46-34= 54394.
DEBUG (43): packet received from 33.
DEBUG (43): r334443= 0.
DEBUG (43): r3343= 0.
DEBUG (43): r4443= 0.
DEBUG (43): s43[0]= 0.561000.
DEBUG (43): s43[1]= 1.000000.
DEBUG (43): s43[2]= 0.000000.
DEBUG (43): s43[3]= 1.000000.
DEBUG (43): ws1= 4.
DEBUG (43): ws2= 4.
DEBUG (43): wa2= 0.877700.
DEBUG (43): wb2= 0.777800.
DEBUG (43): temppkt->n1= 9.
DEBUG (43): temppkt->n2= 8.
DEBUG (43): temppkt->n3= 100.
DEBUG (43): temppkt->n4= 100.
DEBUG (43): temppkt->n5= 100.
DEBUG (43): temppkt->n6= 100.
DEBUG (43): m33-43= 0.877746.
DEBUG (43): n33-43= 0.777890.
DEBUG (43): a33-43= 57520.
DEBUG (43): b33-43= 50973.
DEBUG (22): packet received from 33.
DEBUG (22): r233322= 0.
DEBUG (22): r2322= 0.
DEBUG (22): r3322= 0.
DEBUG (22): s22[0]= 0.485700.
DEBUG (22): s22[1]= 1.000000.
DEBUG (22): s22[2]= 0.000000.
DEBUG (22): s22[3]= 0.561000.
DEBUG (22): ws1= 4.
DEBUG (22): ws2= 4.
DEBUG (22): wa2= 0.777800.
DEBUG (22): wb2= 0.877700.
DEBUG (22): temppkt->n1= 9.
DEBUG (22): temppkt->n2= 8.
DEBUG (22): temppkt->n3= 100.
DEBUG (22): temppkt->n4= 100.
DEBUG (22): temppkt->n5= 100.
DEBUG (22): temppkt->n6= 100.
DEBUG (22): m33-22= 0.777890.
DEBUG (22): n33-22= 0.877746.
DEBUG (22): a33-22= 50973.
DEBUG (22): b33-22= 57520.
DEBUG (35): packet received from 36.
DEBUG (35): r3635= 0.
DEBUG (35): ws1= 4.
DEBUG (35): ws2= 4.
DEBUG (35): wa2= 0.166900.
DEBUG (35): wb2= 0.467900.
DEBUG (35): temppkt->n1= 8.
DEBUG (35): temppkt->n2= 8.
DEBUG (35): temppkt->n3= 100.
DEBUG (35): temppkt->n4= 100.
DEBUG (35): temppkt->n5= 100.
DEBUG (35): temppkt->n6= 100.
DEBUG (35): m36-35= 0.166995.
DEBUG (35): n36-35= 0.467994.
DEBUG (35): a36-35= 10937.
DEBUG (35): b36-35= 30663.
DEBUG (37): packet received from 38.
DEBUG (37): r3837= 0.
DEBUG (37): ws1= 4.
DEBUG (37): ws2= 4.
DEBUG (37): wa2= 0.309400.
DEBUG (37): wb2= 0.539700.
DEBUG (37): temppkt->n1= 9.
DEBUG (37): temppkt->n2= 0.
DEBUG (37): temppkt->n3= 100.
DEBUG (37): temppkt->n4= 100.
DEBUG (37): temppkt->n5= 100.
DEBUG (37): temppkt->n6= 100.
DEBUG (37): m38-37= 0.309499.
DEBUG (37): n38-37= 0.539788.
DEBUG (37): a38-37= 20276.
DEBUG (37): b38-37= 35369.
DEBUG (9): packet received from 43.
DEBUG (9): r439= 0.
DEBUG (9): ws1= 4.
DEBUG (9): ws2= 4.
DEBUG (9): wa2= 0.877600.
DEBUG (9): wb2= 0.777700.
DEBUG (9): temppkt->n1= 9.
DEBUG (9): temppkt->n2= 8.
DEBUG (9): temppkt->n3= 100.
DEBUG (9): temppkt->n4= 100.
DEBUG (9): temppkt->n5= 100.
DEBUG (9): temppkt->n6= 100.
DEBUG (9): m43-9= 0.877699.
DEBUG (9): n43-9= 0.777798.
DEBUG (9): a43-9= 57513.
DEBUG (9): b43-9= 50966.
DEBUG (11): packet received from 12.
DEBUG (11): r1211= 0.
DEBUG (11): ws1= 4.
DEBUG (11): ws2= 4.
DEBUG (11): wa2= 0.604100.
DEBUG (11): wb2= 0.729700.
DEBUG (11): temppkt->n1= 8.
DEBUG (11): temppkt->n2= 7.
DEBUG (11): temppkt->n3= 100.
DEBUG (11): temppkt->n4= 100.
DEBUG (11): temppkt->n5= 100.
DEBUG (11): temppkt->n6= 100.
DEBUG (11): m12-11= 0.604196.
DEBUG (11): n12-11= 0.729793.
DEBUG (11): a12-11= 39589.
DEBUG (11): b12-11= 47820.
DEBUG (1): packet received from 4.
DEBUG (1): r341= 0.
DEBUG (1): r31= 0.
DEBUG (1): r41= 0.
DEBUG (1): s1[0]= 0.000000.
DEBUG (1): s1[1]= 1.000000.
DEBUG (1): s1[2]= 0.000000.
DEBUG (1): s1[3]= 1.000000.
DEBUG (1): ws1= 4.
DEBUG (1): ws2= 4.
DEBUG (1): wa2= 0.476500.
DEBUG (1): wb2= 0.507400.
DEBUG (1): temppkt->n1= 9.
DEBUG (1): temppkt->n2= 100.
DEBUG (1): temppkt->n3= 100.
DEBUG (1): temppkt->n4= 100.
DEBUG (1): temppkt->n5= 100.
DEBUG (1): temppkt->n6= 100.
DEBUG (1): m4-1= 0.476585.
DEBUG (1): n4-1= 0.507500.
DEBUG (1): a4-1= 31227.
DEBUG (1): b4-1= 33252.
DEBUG (10): packet received from 23.
DEBUG (10): r112310= 0.
DEBUG (10): r1110= 0.
DEBUG (10): r2310= 0.
DEBUG (10): s10[0]= 0.000000.
DEBUG (10): s10[1]= 1.000000.
DEBUG (10): s10[2]= 0.000000.
DEBUG (10): s10[3]= 0.485700.
DEBUG (10): ws1= 4.
DEBUG (10): ws2= 4.
DEBUG (10): temppkt3= 7.
DEBUG (10): wa1= 2960.
DEBUG (10): wb1= 8780.
DEBUG (10): wa2= 0.296000.
DEBUG (10): wb2= 0.878000.
DEBUG (10): temppkt->n1= 8.
DEBUG (10): temppkt->n2= 7.
DEBUG (10): temppkt->n3= 7.
DEBUG (10): temppkt->n4= 100.
DEBUG (10): temppkt->n5= 100.
DEBUG (10): temppkt->n6= 100.
DEBUG (10): m23-10= 0.729686.
DEBUG (10): n23-10= 0.787873.
DEBUG (10): a23-10= 19398.
DEBUG (10): b23-10= 57539.
DEBUG (12): packet received from 25.
DEBUG (12): r132512= 0.
DEBUG (12): r1312= 0.
DEBUG (12): r2512= 0.
DEBUG (12): s12[0]= 0.000000.
DEBUG (12): s12[1]= 1.000000.
DEBUG (12): s12[2]= 0.000000.
DEBUG (12): s12[3]= 0.511600.
DEBUG (12): ws1= 4.
DEBUG (12): ws2= 4.
DEBUG (12): wa2= 0.784600.
DEBUG (12): wb2= 0.801000.
DEBUG (12): temppkt->n1= 8.
DEBUG (12): temppkt->n2= 100.
DEBUG (12): temppkt->n3= 100.
DEBUG (12): temppkt->n4= 100.
DEBUG (12): temppkt->n5= 100.
DEBUG (12): temppkt->n6= 100.
DEBUG (12): m25-12= 0.784695.
DEBUG (12): n25-12= 0.801011.
DEBUG (12): a25-12= 51418.
DEBUG (12): b25-12= 52493.
DEBUG (11): packet received from 12.
DEBUG (11): r1211= 0.
DEBUG (11): ws1= 4.
DEBUG (11): ws2= 4.
DEBUG (11): wa2= 0.784500.
DEBUG (11): wb2= 0.800900.
DEBUG (11): temppkt->n1= 8.
DEBUG (11): temppkt->n2= 100.
DEBUG (11): temppkt->n3= 100.
DEBUG (11): temppkt->n4= 100.
DEBUG (11): temppkt->n5= 100.
DEBUG (11): temppkt->n6= 100.
DEBUG (11): m12-11= 0.784588.
DEBUG (11): n12-11= 0.800992.
DEBUG (11): a12-11= 51412.
DEBUG (11): b12-11= 52486.
DEBUG (33): packet received from 34.
DEBUG (33): r3433= 0.
DEBUG (33): ws1= 4.
DEBUG (33): ws2= 4.
DEBUG (33): wa2= 0.689900.
DEBUG (33): wb2= 0.829900.
DEBUG (33): temppkt->n1= 9.
DEBUG (33): temppkt->n2= 9.
DEBUG (33): temppkt->n3= 100.
DEBUG (33): temppkt->n4= 100.
DEBUG (33): temppkt->n5= 100.
DEBUG (33): temppkt->n6= 100.
DEBUG (33): m34-33= 0.689998.
DEBUG (33): n34-33= 0.829999.
DEBUG (33): a34-33= 45212.
DEBUG (33): b34-33= 54387.
DEBUG (7): packet received from 22.
DEBUG (7): r10227= 0.
DEBUG (7): r107= 0.
DEBUG (7): r227= 0.
DEBUG (7): s7[0]= 0.000000.
DEBUG (7): s7[1]= 1.000000.
DEBUG (7): s7[2]= 0.000000.
DEBUG (7): s7[3]= 1.000000.
DEBUG (7): ws1= 4.
DEBUG (7): ws2= 4.
DEBUG (7): wa2= 0.777700.
DEBUG (7): wb2= 0.877600.
DEBUG (7): temppkt->n1= 9.
DEBUG (7): temppkt->n2= 8.
DEBUG (7): temppkt->n3= 100.
DEBUG (7): temppkt->n4= 100.
DEBUG (7): temppkt->n5= 100.
DEBUG (7): temppkt->n6= 100.
DEBUG (7): m22-7= 0.777798.
DEBUG (7): n22-7= 0.877699.
DEBUG (7): a22-7= 50966.
DEBUG (7): b22-7= 57513.
DEBUG (26): packet received from 37.
DEBUG (26): r273726= 0.
DEBUG (26): r2726= 0.
DEBUG (26): r3726= 0.
DEBUG (26): s26[0]= 0.545500.
DEBUG (26): s26[1]= 1.000000.
DEBUG (26): s26[2]= 0.000000.
DEBUG (26): s26[3]= 0.513500.
DEBUG (26): ws1= 4.
DEBUG (26): ws2= 4.
DEBUG (26): wa2= 0.309300.
DEBUG (26): wb2= 0.427600.
DEBUG (26): temppkt->n1= 9.
DEBUG (26): temppkt->n2= 0.
DEBUG (26): temppkt->n3= 100.
DEBUG (26): temppkt->n4= 100.
DEBUG (26): temppkt->n5= 100.
DEBUG (26): temppkt->n6= 100.
DEBUG (26): m37-26= 0.309392.
DEBUG (26): n37-26= 0.427653.
DEBUG (26): a37-26= 20269.
DEBUG (26): b37-26= 28022.
DEBUG (5): packet received from 9.
DEBUG (5): r895= 0.
DEBUG (5): r85= 0.
DEBUG (5): r95= 0.
DEBUG (5): s5[0]= 0.409100.
DEBUG (5): s5[1]= 1.000000.
DEBUG (5): s5[2]= 0.000000.
DEBUG (5): s5[3]= 0.231900.
DEBUG (5): ws1= 4.
DEBUG (5): ws2= 4.
DEBUG (5): temppkt3= 8.
DEBUG (5): wa1= 7750.
DEBUG (5): wb1= 5440.
DEBUG (5): wa2= 0.775000.
DEBUG (5): wb2= 0.544000.
DEBUG (5): temppkt->n1= 9.
DEBUG (5): temppkt->n2= 8.
DEBUG (5): temppkt->n3= 8.
DEBUG (5): temppkt->n4= 100.
DEBUG (5): temppkt->n5= 100.
DEBUG (5): temppkt->n6= 100.
DEBUG (5): m9-5= 0.877592.
DEBUG (5): n9-5= 0.854425.
DEBUG (5): a9-5= 50789.
DEBUG (5): b9-5= 35651.
DEBUG (21): packet received from 9.
DEBUG (21): r921= 0.
DEBUG (21): ws1= 4.
DEBUG (21): ws2= 4.
DEBUG (21): wa2= 0.819600.
DEBUG (21): wb2= 0.777600.
DEBUG (21): temppkt->n1= 9.
DEBUG (21): temppkt->n2= 8.
DEBUG (21): temppkt->n3= 100.
DEBUG (21): temppkt->n4= 100.
DEBUG (21): temppkt->n5= 100.
DEBUG (21): temppkt->n6= 100.
DEBUG (21): m9-21= 0.819680.
DEBUG (21): n9-21= 0.777691.
DEBUG (21): a9-21= 53712.
DEBUG (21): b9-21= 50960.
DEBUG (6): packet received from 9.
DEBUG (6): r96= 0.
DEBUG (6): ws1= 4.
DEBUG (6): ws2= 4.
DEBUG (6): temppkt3= 8.
DEBUG (6): wa1= 5440.
DEBUG (6): wb1= 1960.
DEBUG (6): wa2= 0.544000.
DEBUG (6): wb2= 0.196000.
DEBUG (6): temppkt->n1= 9.
DEBUG (6): temppkt->n2= 8.
DEBUG (6): temppkt->n3= 8.
DEBUG (6): temppkt->n4= 100.
DEBUG (6): temppkt->n5= 100.
DEBUG (6): temppkt->n6= 100.
DEBUG (6): m9-6= 0.854425.
DEBUG (6): n9-6= 0.819680.
DEBUG (6): a9-6= 35651.
DEBUG (6): b9-6= 12844.
DEBUG (34): packet received from 35.
DEBUG (34): r354634= 0.
DEBUG (34): r3534= 0.
DEBUG (34): r4634= 0.
DEBUG (34): s34[0]= 0.448300.
DEBUG (34): s34[1]= 1.000000.
DEBUG (34): s34[2]= 0.000000.
DEBUG (34): s34[3]= 0.466700.
DEBUG (34): ws1= 4.
DEBUG (34): ws2= 4.
DEBUG (34): wa2= 0.301800.
DEBUG (34): wb2= 0.467800.
DEBUG (34): temppkt->n1= 8.
DEBUG (34): temppkt->n2= 8.
DEBUG (34): temppkt->n3= 100.
DEBUG (34): temppkt->n4= 100.
DEBUG (34): temppkt->n5= 100.
DEBUG (34): temppkt->n6= 100.
DEBUG (34): m35-34= 0.301826.
DEBUG (34): n35-34= 0.467887.
DEBUG (34): a35-34= 19778.
DEBUG (34): b35-34= 30657.
DEBUG (7): packet received from 10.
DEBUG (7): r10227= 0.
DEBUG (7): r107= 0.
DEBUG (7): r227= 0.
DEBUG (7): s7[0]= 0.000000.
DEBUG (7): s7[1]= 1.000000.
DEBUG (7): s7[2]= 0.000000.
DEBUG (7): s7[3]= 1.000000.
DEBUG (7): ws1= 4.
DEBUG (7): ws2= 4.
DEBUG (7): wa2= 0.295900.
DEBUG (7): wb2= 0.877900.
DEBUG (7): temppkt->n1= 8.
DEBUG (7): temppkt->n2= 7.
DEBUG (7): temppkt->n3= 7.
DEBUG (7): temppkt->n4= 100.
DEBUG (7): temppkt->n5= 100.
DEBUG (7): temppkt->n6= 100.
DEBUG (7): m10-7= 0.295995.
DEBUG (7): n10-7= 0.877989.
DEBUG (7): a10-7= 19391.
DEBUG (7): b10-7= 57533.
DEBUG (50): packet received from 1.
DEBUG (50): sourceid= 45.
DEBUG (50): r1250= 0.
DEBUG (50): r150= 0.
DEBUG (50): r250= 0.
DEBUG (50): s50[0]= 0.000000.
DEBUG (50): s50[1]= 1.000000.
DEBUG (50): s50[2]= 0.000000.
DEBUG (50): s50[3]= 1.000000.
DEBUG (50): a1= 31227.
DEBUG (50): b1= 33252.
DEBUG (50): btrpkt->n1= 9.
DEBUG (50): btrpkt->n2= 100.
DEBUG (50): btrpkt->n3= 100.
DEBUG (50): btrpkt->n4= 100.
DEBUG (50): btrpkt->n5= 100.
DEBUG (50): btrpkt->n6= 100.
DEBUG (50): ws1= 4.
DEBUG (50): ws2= 4.
DEBUG (50): wa2= 0.476400.
DEBUG (50): wb2= 0.507300.
DEBUG (50): btrpkt->n1= 9.
DEBUG (50): btrpkt->n2= 100.
DEBUG (50): btrpkt->n3= 100.
DEBUG (50): btrpkt->n4= 100.
DEBUG (50): btrpkt->n5= 100.
DEBUG (50): btrpkt->n6= 100.
DEBUG (50): m= 0.476493.
DEBUG (50): n= 0.507393.
DEBUG (50): a2= 31220.
DEBUG (50): b2= 33245.
DEBUG (3): packet received from 7.
DEBUG (3): r73= 0.
DEBUG (3): ws1= 4.
DEBUG (3): ws2= 4.
DEBUG (3): wa2= 0.295800.
DEBUG (3): wb2= 0.615000.
DEBUG (3): temppkt->n1= 8.
DEBUG (3): temppkt->n2= 7.
DEBUG (3): temppkt->n3= 7.
DEBUG (3): temppkt->n4= 100.
DEBUG (3): temppkt->n5= 100.
DEBUG (3): temppkt->n6= 100.
DEBUG (3): m7-3= 0.295888.
DEBUG (3): n7-3= 0.615062.
DEBUG (3): a7-3= 19385.
DEBUG (3): b7-3= 40304.
DEBUG (4): packet received from 7.
DEBUG (4): r5784= 0.
DEBUG (4): r54= 0.
DEBUG (4): r74= 0.
DEBUG (4): r84= 0.
DEBUG (4): s4[0]= 0.000000.
DEBUG (4): s4[1]= 1.000000.
DEBUG (4): s4[2]= 0.548400.
DEBUG (4): s4[3]= 1.000000.
DEBUG (4): s4[4]= 0.000000.
DEBUG (4): s4[5]= 0.409100.
DEBUG (4): ws1= 4.
DEBUG (4): ws2= 4.
DEBUG (4): wa2= 0.615000.
DEBUG (4): wb2= 0.877800.
DEBUG (4): temppkt->n1= 8.
DEBUG (4): temppkt->n2= 7.
DEBUG (4): temppkt->n3= 7.
DEBUG (4): temppkt->n4= 100.
DEBUG (4): temppkt->n5= 100.
DEBUG (4): temppkt->n6= 100.
DEBUG (4): m7-4= 0.615062.
DEBUG (4): n7-4= 0.877897.
DEBUG (4): a7-4= 40304.
DEBUG (4): b7-4= 57526.
DEBUG (33): packet received from 34.
DEBUG (33): r3433= 0.
DEBUG (33): ws1= 4.
DEBUG (33): ws2= 4.
DEBUG (33): wa2= 0.301700.
DEBUG (33): wb2= 0.467700.
DEBUG (33): temppkt->n1= 8.
DEBUG (33): temppkt->n2= 8.
DEBUG (33): temppkt->n3= 100.
DEBUG (33): temppkt->n4= 100.
DEBUG (33): temppkt->n5= 100.
DEBUG (33): temppkt->n6= 100.
DEBUG (33): m34-33= 0.301793.
DEBUG (33): n34-33= 0.467796.
DEBUG (33): a34-33= 19771.
DEBUG (33): b34-33= 30650.
DEBUG (2): packet received from 6.
DEBUG (2): r62= 0.
DEBUG (2): ws1= 4.
DEBUG (2): ws2= 4.
DEBUG (2): wa2= 0.543900.
DEBUG (2): wb2= 0.195900.
DEBUG (2): temppkt->n1= 9.
DEBUG (2): temppkt->n2= 8.
DEBUG (2): temppkt->n3= 8.
DEBUG (2): temppkt->n4= 100.
DEBUG (2): temppkt->n5= 100.
DEBUG (2): temppkt->n6= 100.
DEBUG (2): m6-2= 0.543999.
DEBUG (2): n6-2= 0.195987.
DEBUG (2): a6-2= 35644.
DEBUG (2): b6-2= 12838.
DEBUG (1): packet received from 3.
DEBUG (1): r341= 0.
DEBUG (1): r31= 0.
DEBUG (1): r41= 0.
DEBUG (1): s1[0]= 0.000000.
DEBUG (1): s1[1]= 1.000000.
DEBUG (1): s1[2]= 0.000000.
DEBUG (1): s1[3]= 1.000000.
DEBUG (1): ws1= 4.
DEBUG (1): ws2= 4.
DEBUG (1): wa2= 0.295700.
DEBUG (1): wb2= 0.614900.
DEBUG (1): temppkt->n1= 8.
DEBUG (1): temppkt->n2= 7.
DEBUG (1): temppkt->n3= 7.
DEBUG (1): temppkt->n4= 100.
DEBUG (1): temppkt->n5= 100.
DEBUG (1): temppkt->n6= 100.
DEBUG (1): m3-1= 0.295796.
DEBUG (1): n3-1= 0.615000.
DEBUG (1): a3-1= 19378.
DEBUG (1): b3-1= 40297.
DEBUG (10): packet received from 11.
DEBUG (10): r112310= 0.
DEBUG (10): r1110= 0.
DEBUG (10): r2310= 0.
DEBUG (10): s10[0]= 0.000000.
DEBUG (10): s10[1]= 1.000000.
DEBUG (10): s10[2]= 0.000000.
DEBUG (10): s10[3]= 0.485700.
DEBUG (10): ws1= 4.
DEBUG (10): ws2= 4.
DEBUG (10): wa2= 0.784400.
DEBUG (10): wb2= 0.800800.
DEBUG (10): temppkt->n1= 8.
DEBUG (10): temppkt->n2= 100.
DEBUG (10): temppkt->n3= 100.
DEBUG (10): temppkt->n4= 100.
DEBUG (10): temppkt->n5= 100.
DEBUG (10): temppkt->n6= 100.
DEBUG (10): m11-10= 0.784497.
DEBUG (10): n11-10= 0.800885.
DEBUG (10): a11-10= 51405.
DEBUG (10): b11-10= 52480.
DEBUG (25): packet received from 26.
DEBUG (25): r2625= 0.
DEBUG (25): ws1= 4.
DEBUG (25): ws2= 4.
DEBUG (25): wa2= 0.309200.
DEBUG (25): wb2= 0.427500.
DEBUG (25): temppkt->n1= 9.
DEBUG (25): temppkt->n2= 0.
DEBUG (25): temppkt->n3= 100.
DEBUG (25): temppkt->n4= 100.
DEBUG (25): temppkt->n5= 100.
DEBUG (25): temppkt->n6= 100.
DEBUG (25): m26-25= 0.309285.
DEBUG (25): n26-25= 0.427588.
DEBUG (25): a26-25= 20263.
DEBUG (25): b26-25= 28016.
DEBUG (50): packet received from 2.
DEBUG (50): sourceid= 48.
DEBUG (50): r1250= 0.
DEBUG (50): r150= 0.
DEBUG (50): r250= 0.
DEBUG (50): s50[0]= 0.000000.
DEBUG (50): s50[1]= 1.000000.
DEBUG (50): s50[2]= 0.000000.
DEBUG (50): s50[3]= 1.000000.
DEBUG (50): a1= 35644.
DEBUG (50): b1= 12838.
DEBUG (50): btrpkt->n1= 9.
DEBUG (50): btrpkt->n2= 8.
DEBUG (50): btrpkt->n3= 8.
DEBUG (50): btrpkt->n4= 100.
DEBUG (50): btrpkt->n5= 100.
DEBUG (50): btrpkt->n6= 100.
DEBUG (50): ws1= 4.
DEBUG (50): ws2= 4.
DEBUG (50): wa2= 0.543800.
DEBUG (50): wb2= 0.195800.
DEBUG (50): btrpkt->n1= 9.
DEBUG (50): btrpkt->n2= 8.
DEBUG (50): btrpkt->n3= 8.
DEBUG (50): btrpkt->n4= 100.
DEBUG (50): btrpkt->n5= 100.
DEBUG (50): btrpkt->n6= 100.
DEBUG (50): m= 0.543893.
DEBUG (50): n= 0.195895.
DEBUG (50): a2= 35637.
DEBUG (50): b2= 12831.
DEBUG (22): packet received from 33.
DEBUG (22): r233322= 0.
DEBUG (22): r2322= 0.
DEBUG (22): r3322= 0.
DEBUG (22): s22[0]= 0.485700.
DEBUG (22): s22[1]= 1.000000.
DEBUG (22): s22[2]= 0.000000.
DEBUG (22): s22[3]= 0.561000.
DEBUG (22): ws1= 4.
DEBUG (22): ws2= 4.
DEBUG (22): temppkt3= 3.
DEBUG (22): wa1= 160.
DEBUG (22): wb1= 9480.
DEBUG (22): wa2= 0.016000.
DEBUG (22): wb2= 0.948000.
DEBUG (22): temppkt->n1= 8.
DEBUG (22): temppkt->n2= 8.
DEBUG (22): temppkt->n3= 3.
DEBUG (22): temppkt->n4= 100.
DEBUG (22): temppkt->n5= 100.
DEBUG (22): temppkt->n6= 100.
DEBUG (22): m33-22= 0.301686.
DEBUG (22): n33-22= 0.394814.
DEBUG (22): a33-22= 1048.
DEBUG (22): b33-22= 62127.
DEBUG (1): packet received from 4.
DEBUG (1): r341= 0.
DEBUG (1): r31= 0.
DEBUG (1): r41= 0.
DEBUG (1): s1[0]= 0.000000.
DEBUG (1): s1[1]= 1.000000.
DEBUG (1): s1[2]= 0.000000.
DEBUG (1): s1[3]= 1.000000.
DEBUG (1): ws1= 4.
DEBUG (1): ws2= 4.
DEBUG (1): wa2= 0.614900.
DEBUG (1): wb2= 0.877700.
DEBUG (1): temppkt->n1= 8.
DEBUG (1): temppkt->n2= 7.
DEBUG (1): temppkt->n3= 7.
DEBUG (1): temppkt->n4= 100.
DEBUG (1): temppkt->n5= 100.
DEBUG (1): temppkt->n6= 100.
DEBUG (1): m4-1= 0.615000.
DEBUG (1): n4-1= 0.877791.
DEBUG (1): a4-1= 40297.
DEBUG (1): b4-1= 57520.
DEBUG (50): packet received from 1.
DEBUG (50): sourceid= 39.
DEBUG (50): r1250= 0.
DEBUG (50): r150= 0.
DEBUG (50): r250= 0.
DEBUG (50): s50[0]= 0.000000.
DEBUG (50): s50[1]= 1.000000.
DEBUG (50): s50[2]= 0.000000.
DEBUG (50): s50[3]= 1.000000.
DEBUG (50): a1= 40297.
DEBUG (50): b1= 57520.
DEBUG (50): btrpkt->n1= 8.
DEBUG (50): btrpkt->n2= 7.
DEBUG (50): btrpkt->n3= 7.
DEBUG (50): btrpkt->n4= 100.
DEBUG (50): btrpkt->n5= 100.
DEBUG (50): btrpkt->n6= 100.
DEBUG (50): ws1= 4.
DEBUG (50): ws2= 4.
DEBUG (50): wa2= 0.614800.
DEBUG (50): wb2= 0.877600.
DEBUG (50): btrpkt->n1= 8.
DEBUG (50): btrpkt->n2= 7.
DEBUG (50): btrpkt->n3= 7.
DEBUG (50): btrpkt->n4= 100.
DEBUG (50): btrpkt->n5= 100.
DEBUG (50): btrpkt->n6= 100.
DEBUG (50): m= 0.614893.
DEBUG (50): n= 0.877699.
DEBUG (50): a2= 40290.
DEBUG (50): b2= 57513.
DEBUG (4): packet received from 5.
DEBUG (4): r5784= 0.
DEBUG (4): r54= 0.
DEBUG (4): r74= 0.
DEBUG (4): r84= 0.
DEBUG (4): s4[0]= 0.000000.
DEBUG (4): s4[1]= 1.000000.
DEBUG (4): s4[2]= 0.548400.
DEBUG (4): s4[3]= 1.000000.
DEBUG (4): s4[4]= 0.000000.
DEBUG (4): s4[5]= 0.409100.
DEBUG (4): ws1= 4.
DEBUG (4): ws2= 4.
DEBUG (4): wa2= 0.774900.
DEBUG (4): wb2= 0.543900.
DEBUG (4): temppkt->n1= 9.
DEBUG (4): temppkt->n2= 8.
DEBUG (4): temppkt->n3= 8.
DEBUG (4): temppkt->n4= 100.
DEBUG (4): temppkt->n5= 100.
DEBUG (4): temppkt->n6= 100.
DEBUG (4): m5-4= 0.774990.
DEBUG (4): n5-4= 0.543999.
DEBUG (4): a5-4= 50783.
DEBUG (4): b5-4= 35644.
DEBUG (1): packet received from 4.
DEBUG (1): r341= 0.
DEBUG (1): r31= 0.
DEBUG (1): r41= 0.
DEBUG (1): s1[0]= 0.000000.
DEBUG (1): s1[1]= 1.000000.
DEBUG (1): s1[2]= 0.000000.
DEBUG (1): s1[3]= 1.000000.
DEBUG (1): ws1= 4.
DEBUG (1): ws2= 4.
DEBUG (1): wa2= 0.774800.
DEBUG (1): wb2= 0.543800.
DEBUG (1): temppkt->n1= 9.
DEBUG (1): temppkt->n2= 8.
DEBUG (1): temppkt->n3= 8.
DEBUG (1): temppkt->n4= 100.
DEBUG (1): temppkt->n5= 100.
DEBUG (1): temppkt->n6= 100.
DEBUG (1): m4-1= 0.774899.
DEBUG (1): n4-1= 0.543893.
DEBUG (1): a4-1= 50776.
DEBUG (1): b4-1= 35637.
DEBUG (24): packet received from 25.
DEBUG (24): r253524= 0.
DEBUG (24): r2524= 0.
DEBUG (24): r3524= 0.
DEBUG (24): s24[0]= 0.511600.
DEBUG (24): s24[1]= 1.000000.
DEBUG (24): s24[2]= 0.000000.
DEBUG (24): s24[3]= 0.448300.
DEBUG (24): ws1= 4.
DEBUG (24): ws2= 4.
DEBUG (24): wa2= 0.369700.
DEBUG (24): wb2= 0.427400.
DEBUG (24): temppkt->n1= 9.
DEBUG (24): temppkt->n2= 0.
DEBUG (24): temppkt->n3= 100.
DEBUG (24): temppkt->n4= 100.
DEBUG (24): temppkt->n5= 100.
DEBUG (24): temppkt->n6= 100.
DEBUG (24): m25-24= 0.369717.
DEBUG (24): n25-24= 0.427497.
DEBUG (24): a25-24= 24228.
DEBUG (24): b25-24= 28009.
DEBUG (12): packet received from 25.
DEBUG (12): r132512= 0.
DEBUG (12): r1312= 0.
DEBUG (12): r2512= 0.
DEBUG (12): s12[0]= 0.000000.
DEBUG (12): s12[1]= 1.000000.
DEBUG (12): s12[2]= 0.000000.
DEBUG (12): s12[3]= 0.511600.
DEBUG (12): ws1= 4.
DEBUG (12): ws2= 4.
DEBUG (12): temppkt3= 3.
DEBUG (12): wa1= 910.
DEBUG (12): wb1= 6970.
DEBUG (12): wa2= 0.091000.
DEBUG (12): wb2= 0.697000.
DEBUG (12): temppkt->n1= 9.
DEBUG (12): temppkt->n2= 0.
DEBUG (12): temppkt->n3= 3.
DEBUG (12): temppkt->n4= 100.
DEBUG (12): temppkt->n5= 100.
DEBUG (12): temppkt->n6= 100.
DEBUG (12): m25-12= 0.309194.
DEBUG (12): n25-12= 0.369717.
DEBUG (12): a25-12= 5963.
DEBUG (12): b25-12= 45677.
DEBUG (50): packet received from 1.
DEBUG (50): sourceid= 48.
DEBUG (50): r1250= 0.
DEBUG (50): r150= 0.
DEBUG (50): r250= 0.
DEBUG (50): s50[0]= 0.000000.
DEBUG (50): s50[1]= 1.000000.
DEBUG (50): s50[2]= 0.000000.
DEBUG (50): s50[3]= 1.000000.
DEBUG (50): a1= 50776.
DEBUG (50): b1= 35637.
DEBUG (50): btrpkt->n1= 9.
DEBUG (50): btrpkt->n2= 8.
DEBUG (50): btrpkt->n3= 8.
DEBUG (50): btrpkt->n4= 100.
DEBUG (50): btrpkt->n5= 100.
DEBUG (50): btrpkt->n6= 100.
DEBUG (50): ws1= 4.
DEBUG (50): ws2= 4.
DEBUG (50): wa2= 0.774700.
DEBUG (50): wb2= 0.543700.
DEBUG (50): btrpkt->n1= 9.
DEBUG (50): btrpkt->n2= 8.
DEBUG (50): btrpkt->n3= 8.
DEBUG (50): btrpkt->n4= 100.
DEBUG (50): btrpkt->n5= 100.
DEBUG (50): btrpkt->n6= 100.
DEBUG (50): m= 0.774792.
DEBUG (50): n= 0.543786.
DEBUG (50): a2= 50769.
DEBUG (50): b2= 35631.
DEBUG (11): packet received from 12.
DEBUG (11): r1211= 0.
DEBUG (11): ws1= 3.
DEBUG (11): ws2= 4.
DEBUG (11): wa2= 0.090900.
DEBUG (11): wb2= 0.696900.
DEBUG (11): temppkt->n1= 9.
DEBUG (11): temppkt->n2= 0.
DEBUG (11): temppkt->n3= 3.
DEBUG (11): temppkt->n4= 100.
DEBUG (11): temppkt->n5= 100.
DEBUG (11): temppkt->n6= 100.
DEBUG (11): m12-11= 0.090990.
DEBUG (11): n12-11= 0.696986.
DEBUG (11): a12-11= 5957.
DEBUG (11): b12-11= 45671.
DEBUG (23): packet received from 24.
DEBUG (23): r2423= 0.
DEBUG (23): ws1= 4.
DEBUG (23): ws2= 4.
DEBUG (23): wa2= 0.369600.
DEBUG (23): wb2= 0.427300.
DEBUG (23): temppkt->n1= 9.
DEBUG (23): temppkt->n2= 0.
DEBUG (23): temppkt->n3= 100.
DEBUG (23): temppkt->n4= 100.
DEBUG (23): temppkt->n5= 100.
DEBUG (23): temppkt->n6= 100.
DEBUG (23): m24-23= 0.369696.
DEBUG (23): n24-23= 0.427390.
DEBUG (23): a24-23= 24221.
DEBUG (23): b24-23= 28003.
DEBUG (10): packet received from 11.
DEBUG (10): r112310= 0.
DEBUG (10): r1110= 0.
DEBUG (10): r2310= 0.
DEBUG (10): s10[0]= 0.000000.
DEBUG (10): s10[1]= 1.000000.
DEBUG (10): s10[2]= 0.000000.
DEBUG (10): s10[3]= 0.485700.
DEBUG (10): ws1= 3.
DEBUG (10): ws2= 4.
DEBUG (10): wa2= 0.090800.
DEBUG (10): wb2= 0.696800.
DEBUG (10): temppkt->n1= 9.
DEBUG (10): temppkt->n2= 0.
DEBUG (10): temppkt->n3= 3.
DEBUG (10): temppkt->n4= 100.
DEBUG (10): temppkt->n5= 100.
DEBUG (10): temppkt->n6= 100.
DEBUG (10): m11-10= 0.090898.
DEBUG (10): n11-10= 0.696895.
DEBUG (10): a11-10= 5950.
DEBUG (10): b11-10= 45664.
DEBUG (7): packet received from 10.
DEBUG (7): r10227= 0.
DEBUG (7): r107= 0.
DEBUG (7): r227= 0.
DEBUG (7): s7[0]= 0.000000.
DEBUG (7): s7[1]= 1.000000.
DEBUG (7): s7[2]= 0.000000.
DEBUG (7): s7[3]= 1.000000.
DEBUG (7): ws1= 3.
DEBUG (7): ws2= 4.
DEBUG (7): wa2= 0.090700.
DEBUG (7): wb2= 0.696700.
DEBUG (7): temppkt->n1= 9.
DEBUG (7): temppkt->n2= 0.
DEBUG (7): temppkt->n3= 3.
DEBUG (7): temppkt->n4= 100.
DEBUG (7): temppkt->n5= 100.
DEBUG (7): temppkt->n6= 100.
DEBUG (7): m10-7= 0.090791.
DEBUG (7): n10-7= 0.696788.
DEBUG (7): a10-7= 5944.
DEBUG (7): b10-7= 45658.
DEBUG (22): packet received from 23.
DEBUG (22): r233322= 0.
DEBUG (22): r2322= 0.
DEBUG (22): r3322= 0.
DEBUG (22): s22[0]= 0.485700.
DEBUG (22): s22[1]= 1.000000.
DEBUG (22): s22[2]= 0.000000.
DEBUG (22): s22[3]= 0.561000.
DEBUG (22): ws1= 4.
DEBUG (22): ws2= 4.
DEBUG (22): wa2= 0.397600.
DEBUG (22): wb2= 0.427200.
DEBUG (22): temppkt->n1= 9.
DEBUG (22): temppkt->n2= 0.
DEBUG (22): temppkt->n3= 100.
DEBUG (22): temppkt->n4= 100.
DEBUG (22): temppkt->n5= 100.
DEBUG (22): temppkt->n6= 100.
DEBUG (22): m23-22= 0.397618.
DEBUG (22): n23-22= 0.427298.
DEBUG (22): a23-22= 26056.
DEBUG (22): b23-22= 27996.
DEBUG (3): packet received from 7.
DEBUG (3): r73= 0.
DEBUG (3): ws1= 3.
DEBUG (3): ws2= 4.
DEBUG (3): wa2= 0.090600.
DEBUG (3): wb2= 0.423000.
DEBUG (3): temppkt->n1= 9.
DEBUG (3): temppkt->n2= 0.
DEBUG (3): temppkt->n3= 3.
DEBUG (3): temppkt->n4= 100.
DEBUG (3): temppkt->n5= 100.
DEBUG (3): temppkt->n6= 100.
DEBUG (3): m7-3= 0.090700.
DEBUG (3): n7-3= 0.423028.
DEBUG (3): a7-3= 5937.
DEBUG (3): b7-3= 27721.
DEBUG (4): packet received from 7.
DEBUG (4): r5784= 0.
DEBUG (4): r54= 0.
DEBUG (4): r74= 0.
DEBUG (4): r84= 0.
DEBUG (4): s4[0]= 0.000000.
DEBUG (4): s4[1]= 1.000000.
DEBUG (4): s4[2]= 0.548400.
DEBUG (4): s4[3]= 1.000000.
DEBUG (4): s4[4]= 0.000000.
DEBUG (4): s4[5]= 0.409100.
DEBUG (4): ws1= 4.
DEBUG (4): ws2= 4.
DEBUG (4): wa2= 0.423000.
DEBUG (4): wb2= 0.696600.
DEBUG (4): temppkt->n1= 9.
DEBUG (4): temppkt->n2= 0.
DEBUG (4): temppkt->n3= 3.
DEBUG (4): temppkt->n4= 100.
DEBUG (4): temppkt->n5= 100.
DEBUG (4): temppkt->n6= 100.
DEBUG (4): m7-4= 0.423028.
DEBUG (4): n7-4= 0.696696.
DEBUG (4): a7-4= 27721.
DEBUG (4): b7-4= 45651.
DEBUG (1): packet received from 3.
DEBUG (1): r341= 0.
DEBUG (1): r31= 0.
DEBUG (1): r41= 0.
DEBUG (1): s1[0]= 0.000000.
DEBUG (1): s1[1]= 1.000000.
DEBUG (1): s1[2]= 0.000000.
DEBUG (1): s1[3]= 1.000000.
DEBUG (1): ws1= 3.
DEBUG (1): ws2= 4.
DEBUG (1): wa2= 0.090500.
DEBUG (1): wb2= 0.422900.
DEBUG (1): temppkt->n1= 9.
DEBUG (1): temppkt->n2= 0.
DEBUG (1): temppkt->n3= 3.
DEBUG (1): temppkt->n4= 100.
DEBUG (1): temppkt->n5= 100.
DEBUG (1): temppkt->n6= 100.
DEBUG (1): m3-1= 0.090593.
DEBUG (1): n3-1= 0.422995.
DEBUG (1): a3-1= 5930.
DEBUG (1): b3-1= 27714.
DEBUG (7): packet received from 22.
DEBUG (7): r10227= 0.
DEBUG (7): r107= 0.
DEBUG (7): r227= 0.
DEBUG (7): s7[0]= 0.000000.
DEBUG (7): s7[1]= 1.000000.
DEBUG (7): s7[2]= 0.000000.
DEBUG (7): s7[3]= 1.000000.
DEBUG (7): ws1= 4.
DEBUG (7): ws2= 4.
DEBUG (7): wa2= 0.397500.
DEBUG (7): wb2= 0.427100.
DEBUG (7): temppkt->n1= 9.
DEBUG (7): temppkt->n2= 0.
DEBUG (7): temppkt->n3= 100.
DEBUG (7): temppkt->n4= 100.
DEBUG (7): temppkt->n5= 100.
DEBUG (7): temppkt->n6= 100.
DEBUG (7): m22-7= 0.397589.
DEBUG (7): n22-7= 0.427192.
DEBUG (7): a22-7= 26050.
DEBUG (7): b22-7= 27989.
DEBUG (1): packet received from 4.
DEBUG (1): r341= 0.
DEBUG (1): r31= 0.
DEBUG (1): r41= 0.
DEBUG (1): s1[0]= 0.000000.
DEBUG (1): s1[1]= 1.000000.
DEBUG (1): s1[2]= 0.000000.
DEBUG (1): s1[3]= 1.000000.
DEBUG (1): ws1= 4.
DEBUG (1): ws2= 4.
DEBUG (1): wa2= 0.422900.
DEBUG (1): wb2= 0.696500.
DEBUG (1): temppkt->n1= 9.
DEBUG (1): temppkt->n2= 0.
DEBUG (1): temppkt->n3= 3.
DEBUG (1): temppkt->n4= 100.
DEBUG (1): temppkt->n5= 100.
DEBUG (1): temppkt->n6= 100.
DEBUG (1): m4-1= 0.422995.
DEBUG (1): n4-1= 0.696590.
DEBUG (1): a4-1= 27714.
DEBUG (1): b4-1= 45645.
DEBUG (4): packet received from 7.
DEBUG (4): r5784= 0.
DEBUG (4): r54= 0.
DEBUG (4): r74= 0.
DEBUG (4): r84= 0.
DEBUG (4): s4[0]= 0.000000.
DEBUG (4): s4[1]= 1.000000.
DEBUG (4): s4[2]= 0.548400.
DEBUG (4): s4[3]= 1.000000.
DEBUG (4): s4[4]= 0.000000.
DEBUG (4): s4[5]= 0.409100.
DEBUG (4): ws1= 4.
DEBUG (4): ws2= 4.
DEBUG (4): temppkt3= 4.
DEBUG (4): wa1= 1370.
DEBUG (4): wb1= 2700.
DEBUG (4): wa2= 0.137000.
DEBUG (4): wb2= 0.270000.
DEBUG (4): temppkt->n1= 9.
DEBUG (4): temppkt->n2= 0.
DEBUG (4): temppkt->n3= 4.
DEBUG (4): temppkt->n4= 100.
DEBUG (4): temppkt->n5= 100.
DEBUG (4): temppkt->n6= 100.
DEBUG (4): m7-4= 0.413723.
DEBUG (4): n7-4= 0.427085.
DEBUG (4): a7-4= 8978.
DEBUG (4): b7-4= 17694.
DEBUG (1): packet received from 4.
DEBUG (1): r341= 0.
DEBUG (1): r31= 0.
DEBUG (1): r41= 0.
DEBUG (1): s1[0]= 0.000000.
DEBUG (1): s1[1]= 1.000000.
DEBUG (1): s1[2]= 0.000000.
DEBUG (1): s1[3]= 1.000000.
DEBUG (1): ws1= 4.
DEBUG (1): ws2= 4.
DEBUG (1): wa2= 0.136900.
DEBUG (1): wb2= 0.269900.
DEBUG (1): temppkt->n1= 9.
DEBUG (1): temppkt->n2= 0.
DEBUG (1): temppkt->n3= 4.
DEBUG (1): temppkt->n4= 100.
DEBUG (1): temppkt->n5= 100.
DEBUG (1): temppkt->n6= 100.
DEBUG (1): m4-1= 0.136995.
DEBUG (1): n4-1= 0.269993.
DEBUG (1): a4-1= 8971.
DEBUG (1): b4-1= 17687.
DEBUG (50): packet received from 1.
DEBUG (50): sourceid= 42.
DEBUG (50): r1250= 0.
DEBUG (50): r150= 0.
DEBUG (50): r250= 0.
DEBUG (50): s50[0]= 0.000000.
DEBUG (50): s50[1]= 1.000000.
DEBUG (50): s50[2]= 0.000000.
DEBUG (50): s50[3]= 1.000000.
DEBUG (50): a1= 8971.
DEBUG (50): b1= 17687.
DEBUG (50): btrpkt->n1= 9.
DEBUG (50): btrpkt->n2= 0.
DEBUG (50): btrpkt->n3= 4.
DEBUG (50): btrpkt->n4= 100.
DEBUG (50): btrpkt->n5= 100.
DEBUG (50): btrpkt->n6= 100.
DEBUG (50): ws1= 4.
DEBUG (50): ws2= 4.
DEBUG (50): wa2= 0.136800.
DEBUG (50): wb2= 0.269800.
DEBUG (50): btrpkt->n1= 9.
DEBUG (50): btrpkt->n2= 0.
DEBUG (50): btrpkt->n3= 4.
DEBUG (50): btrpkt->n4= 100.
DEBUG (50): btrpkt->n5= 100.
DEBUG (50): btrpkt->n6= 100.
DEBUG (50): m= 0.136889.
DEBUG (50): n= 0.269886.
DEBUG (50): a2= 8965.
DEBUG (50): b2= 17681.
DEBUG (1): count is 6.
DEBUG (1): **************************.
DEBUG (2): count is 6.
DEBUG (2): **************************.
DEBUG (3): count is 6.
DEBUG (3): **************************.
DEBUG (4): count is 6.
DEBUG (4): **************************.
DEBUG (5): count is 6.
DEBUG (5): **************************.
DEBUG (6): count is 6.
DEBUG (6): **************************.
DEBUG (7): count is 6.
DEBUG (7): **************************.
DEBUG (8): count is 6.
DEBUG (8): **************************.
DEBUG (9): count is 6.
DEBUG (9): **************************.
DEBUG (10): count is 6.
DEBUG (10): **************************.
DEBUG (11): count is 6.
DEBUG (11): **************************.
DEBUG (12): count is 6.
DEBUG (12): **************************.
DEBUG (13): count is 6.
DEBUG (13): **************************.
DEBUG (14): count is 6.
DEBUG (14): **************************.
DEBUG (15): count is 6.
DEBUG (15): **************************.
DEBUG (16): count is 6.
DEBUG (16): **************************.
DEBUG (17): count is 6.
DEBUG (17): **************************.
DEBUG (18): count is 6.
DEBUG (18): **************************.
DEBUG (19): count is 6.
DEBUG (19): **************************.
DEBUG (20): count is 6.
DEBUG (20): **************************.
DEBUG (21): count is 6.
DEBUG (21): **************************.
DEBUG (22): count is 6.
DEBUG (22): **************************.
DEBUG (23): count is 6.
DEBUG (23): **************************.
DEBUG (24): count is 6.
DEBUG (24): **************************.
DEBUG (25): count is 6.
DEBUG (25): **************************.
DEBUG (26): count is 6.
DEBUG (26): **************************.
DEBUG (27): count is 6.
DEBUG (27): **************************.
DEBUG (28): count is 6.
DEBUG (28): **************************.
DEBUG (29): count is 6.
DEBUG (29): **************************.
DEBUG (30): count is 6.
DEBUG (30): **************************.
DEBUG (31): count is 6.
DEBUG (31): **************************.
DEBUG (32): count is 6.
DEBUG (32): **************************.
DEBUG (33): count is 6.
DEBUG (33): **************************.
DEBUG (34): count is 6.
DEBUG (34): **************************.
DEBUG (35): count is 6.
DEBUG (35): **************************.
DEBUG (36): count is 6.
DEBUG (36): **************************.
DEBUG (37): count is 6.
DEBUG (37): **************************.
DEBUG (38): count is 6.
DEBUG (38): **************************.
DEBUG (39): count is 6.
DEBUG (39): **************************.
DEBUG (40): count is 6.
DEBUG (40): **************************.
DEBUG (41): count is 6.
DEBUG (41): **************************.
DEBUG (42): count is 6.
DEBUG (42): **************************.
DEBUG (43): count is 6.
DEBUG (43): **************************.
DEBUG (44): count is 6.
DEBUG (44): **************************.
DEBUG (45): count is 6.
DEBUG (45): **************************.
DEBUG (46): count is 6.
DEBUG (46): **************************.
DEBUG (47): count is 6.
DEBUG (47): **************************.
DEBUG (48): count is 6.
DEBUG (48): **************************.
DEBUG (49): count is 6.
DEBUG (49): **************************.
DEBUG (50): count is 6.
DEBUG (50): **************************.
DEBUG (19): packet received from 20.
DEBUG (19): r203219= 0.
DEBUG (19): r2019= 0.
DEBUG (19): r3219= 0.
DEBUG (19): s19[0]= 0.000000.
DEBUG (19): s19[1]= 1.000000.
DEBUG (19): s19[2]= 0.000000.
DEBUG (19): s19[3]= 0.428600.
DEBUG (19): ws1= 4.
DEBUG (19): ws2= 5.
DEBUG (19): wa2= 0.983100.
DEBUG (19): wb2= 1.000000.
DEBUG (19): temppkt->n1= 100.
DEBUG (19): temppkt->n2= 100.
DEBUG (19): temppkt->n3= 100.
DEBUG (19): temppkt->n4= 100.
DEBUG (19): temppkt->n5= 100.
DEBUG (19): temppkt->n6= 100.
DEBUG (19): m20-19= 0.983200.
DEBUG (19): n20-19= 1.000000.
DEBUG (19): a20-19= 64427.
DEBUG (19): b20-19= 65535.
DEBUG (30): packet received from 31.
DEBUG (30): r314130= 0.
DEBUG (30): r3130= 0.
DEBUG (30): r4130= 0.
DEBUG (30): s30[0]= 0.000000.
DEBUG (30): s30[1]= 0.400000.
DEBUG (30): s30[2]= 0.000000.
DEBUG (30): s30[3]= 0.473700.
DEBUG (30): ws1= 4.
DEBUG (30): ws2= 4.
DEBUG (30): temppkt1= 7.
DEBUG (30): wa1= 4390.
DEBUG (30): wb1= 4660.
DEBUG (30): temppkt2= 4.
DEBUG (30): wa1= 3900.
DEBUG (30): wb1= 6600.
DEBUG (30): wa2= 0.390000.
DEBUG (30): wb2= 0.660000.
DEBUG (30): temppkt->n1= 7.
DEBUG (30): temppkt->n2= 4.
DEBUG (30): temppkt->n3= 100.
DEBUG (30): temppkt->n4= 100.
DEBUG (30): temppkt->n5= 100.
DEBUG (30): temppkt->n6= 100.
DEBUG (30): m31-30= 0.743999.
DEBUG (30): n31-30= 0.746636.
DEBUG (30): a31-30= 25558.
DEBUG (30): b31-30= 43253.
DEBUG (50): packet received from 2.
DEBUG (50): sourceid= 2.
DEBUG (50): r1250= 0.
DEBUG (50): r150= 0.
DEBUG (50): r250= 0.
DEBUG (50): s50[0]= 0.000000.
DEBUG (50): s50[1]= 1.000000.
DEBUG (50): s50[2]= 0.000000.
DEBUG (50): s50[3]= 1.000000.
DEBUG (50): a1= 6409.
DEBUG (50): b1= 9122.
DEBUG (50): btrpkt->n1= 100.
DEBUG (50): btrpkt->n2= 100.
DEBUG (50): btrpkt->n3= 100.
DEBUG (50): btrpkt->n4= 100.
DEBUG (50): btrpkt->n5= 100.
DEBUG (50): btrpkt->n6= 100.
DEBUG (50): ws1= 3.
DEBUG (50): ws2= 4.
DEBUG (50): wa2= 0.097700.
DEBUG (50): wb2= 0.139100.
DEBUG (50): btrpkt->n1= 100.
DEBUG (50): btrpkt->n2= 100.
DEBUG (50): btrpkt->n3= 100.
DEBUG (50): btrpkt->n4= 100.
DEBUG (50): btrpkt->n5= 100.
DEBUG (50): btrpkt->n6= 100.
DEBUG (50): m= 0.097795.
DEBUG (50): n= 0.139193.
DEBUG (50): a2= 6402.
DEBUG (50): b2= 9115.
DEBUG (26): packet received from 37.
DEBUG (26): r273726= 0.
DEBUG (26): r2726= 0.
DEBUG (26): r3726= 0.
DEBUG (26): s26[0]= 0.545500.
DEBUG (26): s26[1]= 1.000000.
DEBUG (26): s26[2]= 0.000000.
DEBUG (26): s26[3]= 0.513500.
DEBUG (26): ws1= 4.
DEBUG (26): ws2= 4.
DEBUG (26): temppkt1= 8.
DEBUG (26): wa1= 4500.
DEBUG (26): wb1= 5310.
DEBUG (26): wa2= 0.450000.
DEBUG (26): wb2= 0.531000.
DEBUG (26): a1= 0.
DEBUG (26): temppkt->n1= 8.
DEBUG (26): temppkt->n2= 100.
DEBUG (26): temppkt->n3= 100.
DEBUG (26): temppkt->n4= 100.
DEBUG (26): temppkt->n5= 100.
DEBUG (26): temppkt->n6= 100.
DEBUG (26): m37-26= 0.845090.
DEBUG (26): n37-26= 0.853153.
DEBUG (26): a37-26= 29490.
DEBUG (26): b37-26= 34799.
DEBUG (36): packet received from 37.
DEBUG (36): r374836= 0.
DEBUG (36): r3736= 0.
DEBUG (36): r4836= 0.
DEBUG (36): s36[0]= 0.513500.
DEBUG (36): s36[1]= 1.000000.
DEBUG (36): s36[2]= 0.000000.
DEBUG (36): s36[3]= 0.416700.
DEBUG (36): ws1= 4.
DEBUG (36): ws2= 4.
DEBUG (36): temppkt1= 8.
DEBUG (36): wa1= 5310.
DEBUG (36): wb1= 6070.
DEBUG (36): wa2= 0.531000.
DEBUG (36): wb2= 0.607000.
DEBUG (36): a1= 0.
DEBUG (36): temppkt->n1= 8.
DEBUG (36): temppkt->n2= 100.
DEBUG (36): temppkt->n3= 100.
DEBUG (36): temppkt->n4= 100.
DEBUG (36): temppkt->n5= 100.
DEBUG (36): temppkt->n6= 100.
DEBUG (36): m37-36= 0.853153.
DEBUG (36): n37-36= 0.860792.
DEBUG (36): a37-36= 34799.
DEBUG (36): b37-36= 39779.
DEBUG (10): packet received from 11.
DEBUG (10): r112310= 0.
DEBUG (10): r1110= 0.
DEBUG (10): r2310= 0.
DEBUG (10): s10[0]= 0.000000.
DEBUG (10): s10[1]= 1.000000.
DEBUG (10): s10[2]= 0.000000.
DEBUG (10): s10[3]= 0.485700.
DEBUG (10): ws1= 4.
DEBUG (10): ws2= 4.
DEBUG (10): wa2= 0.689700.
DEBUG (10): wb2= 0.732300.
DEBUG (10): temppkt->n1= 100.
DEBUG (10): temppkt->n2= 100.
DEBUG (10): temppkt->n3= 100.
DEBUG (10): temppkt->n4= 100.
DEBUG (10): temppkt->n5= 100.
DEBUG (10): temppkt->n6= 100.
DEBUG (10): m11-10= 0.689799.
DEBUG (10): n11-10= 0.732387.
DEBUG (10): a11-10= 45199.
DEBUG (10): b11-10= 47991.
DEBUG (13): packet received from 14.
DEBUG (13): r1413= 0.
DEBUG (13): ws1= 4.
DEBUG (13): ws2= 4.
DEBUG (13): temppkt1= 8.
DEBUG (13): wa1= 3670.
DEBUG (13): wb1= 9310.
DEBUG (13): wa2= 0.367000.
DEBUG (13): wb2= 0.931000.
DEBUG (13): a1= 0.
DEBUG (13): temppkt->n1= 8.
DEBUG (13): temppkt->n2= 100.
DEBUG (13): temppkt->n3= 100.
DEBUG (13): temppkt->n4= 100.
DEBUG (13): temppkt->n5= 100.
DEBUG (13): temppkt->n6= 100.
DEBUG (13): m14-13= 0.836789.
DEBUG (13): n14-13= 0.893187.
DEBUG (13): a14-13= 24051.
DEBUG (13): b14-13= 61013.
DEBUG (18): packet received from 19.
DEBUG (18): r1918= 0.
DEBUG (18): ws1= 4.
DEBUG (18): ws2= 5.
DEBUG (18): wa2= 0.983000.
DEBUG (18): wb2= 1.000000.
DEBUG (18): temppkt->n1= 100.
DEBUG (18): temppkt->n2= 100.
DEBUG (18): temppkt->n3= 100.
DEBUG (18): temppkt->n4= 100.
DEBUG (18): temppkt->n5= 100.
DEBUG (18): temppkt->n6= 100.
DEBUG (18): m19-18= 0.983093.
DEBUG (18): n19-18= 1.000000.
DEBUG (18): a19-18= 64420.
DEBUG (18): b19-18= 65535.
DEBUG (46): packet received from 47.
DEBUG (46): r4746= 0.
DEBUG (46): ws1= 4.
DEBUG (46): ws2= 4.
DEBUG (46): temppkt1= 9.
DEBUG (46): wa1= 7340.
DEBUG (46): wb1= 8500.
DEBUG (46): wa2= 0.734000.
DEBUG (46): wb2= 0.850000.
DEBUG (46): a1= 0.
DEBUG (46): temppkt->n1= 9.
DEBUG (46): temppkt->n2= 100.
DEBUG (46): temppkt->n3= 100.
DEBUG (46): temppkt->n4= 100.
DEBUG (46): temppkt->n5= 100.
DEBUG (46): temppkt->n6= 100.
DEBUG (46): m47-46= 0.973495.
DEBUG (46): n47-46= 0.985092.
DEBUG (46): a47-46= 48102.
DEBUG (46): b47-46= 55704.
DEBUG (48): packet received from 49.
DEBUG (48): r4948= 0.
DEBUG (48): ws1= 4.
DEBUG (48): ws2= 5.
DEBUG (48): wa2= 0.995200.
DEBUG (48): wb2= 1.000000.
DEBUG (48): temppkt->n1= 100.
DEBUG (48): temppkt->n2= 100.
DEBUG (48): temppkt->n3= 100.
DEBUG (48): temppkt->n4= 100.
DEBUG (48): temppkt->n5= 100.
DEBUG (48): temppkt->n6= 100.
DEBUG (48): m49-48= 0.995257.
DEBUG (48): n49-48= 1.000000.
DEBUG (48): a49-48= 65220.
DEBUG (48): b49-48= 65535.
DEBUG (1): packet received from 3.
DEBUG (1): r341= 0.
DEBUG (1): r31= 0.
DEBUG (1): r41= 0.
DEBUG (1): s1[0]= 0.000000.
DEBUG (1): s1[1]= 1.000000.
DEBUG (1): s1[2]= 0.000000.
DEBUG (1): s1[3]= 1.000000.
DEBUG (1): ws1= 4.
DEBUG (1): ws2= 4.
DEBUG (1): temppkt1= 1.
DEBUG (1): wa1= 3910.
DEBUG (1): wb1= 9550.
DEBUG (1): wa2= 0.391000.
DEBUG (1): wb2= 0.955000.
DEBUG (1): a1= 0.
DEBUG (1): temppkt->n1= 1.
DEBUG (1): temppkt->n2= 100.
DEBUG (1): temppkt->n3= 100.
DEBUG (1): temppkt->n4= 100.
DEBUG (1): temppkt->n5= 100.
DEBUG (1): temppkt->n6= 100.
DEBUG (1): m3-1= 0.139193.
DEBUG (1): n3-1= 0.195590.
DEBUG (1): a3-1= 25624.
DEBUG (1): b3-1= 62585.
DEBUG (4): packet received from 8.
DEBUG (4): r5784= 0.
DEBUG (4): r54= 0.
DEBUG (4): r74= 0.
DEBUG (4): r84= 0.
DEBUG (4): s4[0]= 0.000000.
DEBUG (4): s4[1]= 1.000000.
DEBUG (4): s4[2]= 0.548400.
DEBUG (4): s4[3]= 1.000000.
DEBUG (4): s4[4]= 0.000000.
DEBUG (4): s4[5]= 0.409100.
DEBUG (4): ws1= 4.
DEBUG (4): ws2= 4.
DEBUG (4): temppkt1= 5.
DEBUG (4): wa1= 1190.
DEBUG (4): wb1= 3030.
DEBUG (4): wa2= 0.119000.
DEBUG (4): wb2= 0.303000.
DEBUG (4): a1= 0.
DEBUG (4): temppkt->n1= 5.
DEBUG (4): temppkt->n2= 100.
DEBUG (4): temppkt->n3= 100.
DEBUG (4): temppkt->n4= 100.
DEBUG (4): temppkt->n5= 100.
DEBUG (4): temppkt->n6= 100.
DEBUG (4): m8-4= 0.511986.
DEBUG (4): n8-4= 0.530314.
DEBUG (4): a8-4= 7798.
DEBUG (4): b8-4= 19857.
DEBUG (5): packet received from 8.
DEBUG (5): r895= 0.
DEBUG (5): r85= 0.
DEBUG (5): r95= 0.
DEBUG (5): s5[0]= 0.409100.
DEBUG (5): s5[1]= 1.000000.
DEBUG (5): s5[2]= 0.000000.
DEBUG (5): s5[3]= 0.231900.
DEBUG (5): ws1= 4.
DEBUG (5): ws2= 4.
DEBUG (5): temppkt1= 5.
DEBUG (5): wa1= 3030.
DEBUG (5): wb1= 5670.
DEBUG (5): wa2= 0.303000.
DEBUG (5): wb2= 0.567000.
DEBUG (5): a1= 0.
DEBUG (5): temppkt->n1= 5.
DEBUG (5): temppkt->n2= 100.
DEBUG (5): temppkt->n3= 100.
DEBUG (5): temppkt->n4= 100.
DEBUG (5): temppkt->n5= 100.
DEBUG (5): temppkt->n6= 100.
DEBUG (5): m8-5= 0.530314.
DEBUG (5): n8-5= 0.556786.
DEBUG (5): a8-5= 19857.
DEBUG (5): b8-5= 37158.
DEBUG (37): packet received from 38.
DEBUG (37): r3837= 0.
DEBUG (37): ws1= 4.
DEBUG (37): ws2= 4.
DEBUG (37): temppkt1= 8.
DEBUG (37): wa1= 6070.
DEBUG (37): wb1= 7310.
DEBUG (37): wa2= 0.607000.
DEBUG (37): wb2= 0.731000.
DEBUG (37): a1= 0.
DEBUG (37): temppkt->n1= 8.
DEBUG (37): temppkt->n2= 100.
DEBUG (37): temppkt->n3= 100.
DEBUG (37): temppkt->n4= 100.
DEBUG (37): temppkt->n5= 100.
DEBUG (37): temppkt->n6= 100.
DEBUG (37): m38-37= 0.860792.
DEBUG (37): n38-37= 0.873198.
DEBUG (37): a38-37= 39779.
DEBUG (37): b38-37= 47906.
DEBUG (15): packet received from 16.
DEBUG (15): r1615= 0.
DEBUG (15): ws1= 4.
DEBUG (15): ws2= 4.
DEBUG (15): temppkt1= 9.
DEBUG (15): wa1= 2610.
DEBUG (15): wb1= 5930.
DEBUG (15): wa2= 0.261000.
DEBUG (15): wb2= 0.593000.
DEBUG (15): a1= 0.
DEBUG (15): temppkt->n1= 9.
DEBUG (15): temppkt->n2= 100.
DEBUG (15): temppkt->n3= 100.
DEBUG (15): temppkt->n4= 100.
DEBUG (15): temppkt->n5= 100.
DEBUG (15): temppkt->n6= 100.
DEBUG (15): m16-15= 0.926192.
DEBUG (15): n16-15= 0.959396.
DEBUG (15): a16-15= 17104.
DEBUG (15): b16-15= 38862.
DEBUG (47): packet received from 48.
DEBUG (47): r4847= 0.
DEBUG (47): ws1= 4.
DEBUG (47): ws2= 5.
DEBUG (47): wa2= 0.997100.
DEBUG (47): wb2= 1.000000.
DEBUG (47): temppkt->n1= 100.
DEBUG (47): temppkt->n2= 100.
DEBUG (47): temppkt->n3= 100.
DEBUG (47): temppkt->n4= 100.
DEBUG (47): temppkt->n5= 100.
DEBUG (47): temppkt->n6= 100.
DEBUG (47): m48-47= 0.997196.
DEBUG (47): n48-47= 1.000000.
DEBUG (47): a48-47= 65344.
DEBUG (47): b48-47= 65535.
DEBUG (36): packet received from 48.
DEBUG (36): r374836= 0.
DEBUG (36): r3736= 0.
DEBUG (36): r4836= 0.
DEBUG (36): s36[0]= 0.513500.
DEBUG (36): s36[1]= 1.000000.
DEBUG (36): s36[2]= 0.000000.
DEBUG (36): s36[3]= 0.416700.
DEBUG (36): ws1= 4.
DEBUG (36): ws2= 4.
DEBUG (36): temppkt1= 9.
DEBUG (36): wa1= 9510.
DEBUG (36): wb1= 9710.
DEBUG (36): temppkt2= 9.
DEBUG (36): wa1= 5100.
DEBUG (36): wb1= 7100.
DEBUG (36): wa2= 0.510000.
DEBUG (36): wb2= 0.710000.
DEBUG (36): temppkt->n1= 9.
DEBUG (36): temppkt->n2= 9.
DEBUG (36): temppkt->n3= 100.
DEBUG (36): temppkt->n4= 100.
DEBUG (36): temppkt->n5= 100.
DEBUG (36): temppkt->n6= 100.
DEBUG (36): m48-36= 0.995193.
DEBUG (36): n48-36= 0.997196.
DEBUG (36): a48-36= 33422.
DEBUG (36): b48-36= 46529.
DEBUG (1): packet received from 4.
DEBUG (1): r341= 0.
DEBUG (1): r31= 0.
DEBUG (1): r41= 0.
DEBUG (1): s1[0]= 0.000000.
DEBUG (1): s1[1]= 1.000000.
DEBUG (1): s1[2]= 0.000000.
DEBUG (1): s1[3]= 1.000000.
DEBUG (1): ws1= 4.
DEBUG (1): ws2= 4.
DEBUG (1): wa2= 0.118900.
DEBUG (1): wb2= 0.302900.
DEBUG (1): temppkt->n1= 5.
DEBUG (1): temppkt->n2= 100.
DEBUG (1): temppkt->n3= 100.
DEBUG (1): temppkt->n4= 100.
DEBUG (1): temppkt->n5= 100.
DEBUG (1): temppkt->n6= 100.
DEBUG (1): m4-1= 0.118990.
DEBUG (1): n4-1= 0.302998.
DEBUG (1): a4-1= 7792.
DEBUG (1): b4-1= 19850.
DEBUG (5): packet received from 9.
DEBUG (5): r895= 0.
DEBUG (5): r85= 0.
DEBUG (5): r95= 0.
DEBUG (5): s5[0]= 0.409100.
DEBUG (5): s5[1]= 1.000000.
DEBUG (5): s5[2]= 0.000000.
DEBUG (5): s5[3]= 0.231900.
DEBUG (5): ws1= 4.
DEBUG (5): ws2= 4.
DEBUG (5): temppkt1= 5.
DEBUG (5): wa1= 5670.
DEBUG (5): wb1= 6600.
DEBUG (5): wa2= 0.567000.
DEBUG (5): wb2= 0.660000.
DEBUG (5): a1= 0.
DEBUG (5): temppkt->n1= 5.
DEBUG (5): temppkt->n2= 100.
DEBUG (5): temppkt->n3= 100.
DEBUG (5): temppkt->n4= 100.
DEBUG (5): temppkt->n5= 100.
DEBUG (5): temppkt->n6= 100.
DEBUG (5): m9-5= 0.556786.
DEBUG (5): n9-5= 0.566019.
DEBUG (5): a9-5= 37158.
DEBUG (5): b9-5= 43253.
DEBUG (21): packet received from 9.
DEBUG (21): r921= 0.
DEBUG (21): ws1= 4.
DEBUG (21): ws2= 4.
DEBUG (21): temppkt1= 5.
DEBUG (21): wa1= 7980.
DEBUG (21): wb1= 9650.
DEBUG (21): wa2= 0.798000.
DEBUG (21): wb2= 0.965000.
DEBUG (21): a1= 0.
DEBUG (21): temppkt->n1= 5.
DEBUG (21): temppkt->n2= 100.
DEBUG (21): temppkt->n3= 100.
DEBUG (21): temppkt->n4= 100.
DEBUG (21): temppkt->n5= 100.
DEBUG (21): temppkt->n6= 100.
DEBUG (21): m9-21= 0.579865.
DEBUG (21): n9-21= 0.596597.
DEBUG (21): a9-21= 52296.
DEBUG (21): b9-21= 63241.
DEBUG (3): packet received from 7.
DEBUG (3): r73= 0.
DEBUG (3): ws1= 4.
DEBUG (3): ws2= 4.
DEBUG (3): temppkt1= 4.
DEBUG (3): wa1= 2410.
DEBUG (3): wb1= 7230.
DEBUG (3): wa2= 0.241000.
DEBUG (3): wb2= 0.723000.
DEBUG (3): a1= 0.
DEBUG (3): temppkt->n1= 4.
DEBUG (3): temppkt->n2= 100.
DEBUG (3): temppkt->n3= 100.
DEBUG (3): temppkt->n4= 100.
DEBUG (3): temppkt->n5= 100.
DEBUG (3): temppkt->n6= 100.
DEBUG (3): m7-3= 0.424186.
DEBUG (3): n7-3= 0.472335.
DEBUG (3): a7-3= 15793.
DEBUG (3): b7-3= 47381.
DEBUG (12): packet received from 13.
DEBUG (12): r132512= 0.
DEBUG (12): r1312= 0.
DEBUG (12): r2512= 0.
DEBUG (12): s12[0]= 0.000000.
DEBUG (12): s12[1]= 1.000000.
DEBUG (12): s12[2]= 0.000000.
DEBUG (12): s12[3]= 0.511600.
DEBUG (12): ws1= 4.
DEBUG (12): ws2= 4.
DEBUG (12): wa2= 0.366900.
DEBUG (12): wb2= 0.930900.
[truncated: 3,874,652 more chars]
