# Supplementary material for: Cluster‐Based Arithmetic Coding for Data Provenance Compression in Wireless Sensor Networks
Source: Hindawi journal article supplement (doi:10.1155/2018/9576978), 2018-01-01
Supplement: f1 [file 9576978.f1.zip › 9576978.f1/simulation code/arithmetic/Makefile]

COMPONENT=NetworkAppC
include $(MAKERULES)
