# Supplementary material for: Cluster‐Based Arithmetic Coding for Data Provenance Compression in Wireless Sensor Networks
Source: Hindawi journal article supplement (doi:10.1155/2018/9576978), 2018-01-01
Supplement: f1 [file 9576978.f1.zip › 9576978.f1/simulation code/arithmetic/meyer-short.txt]

-41
-41
-41
-41
-41
-41
-41
-91
-41
-41
-41
-41
-41
-48
-41
-41
-41
-83
-98
-80
-80
-79
-79
-79
-79
-98
-79
-80
-79
-80
-80
-80
-83
-83
-83
-83
-82
-82
-41
-82
-82
-82
-82
-82
-82
-41
-94
-93
-93
-87
-89
-90
-45
-92
-85
-98
-80
-80
-79
-78
-79
-79
-79
-97
-94
-83
-81
-80
-82
-81
-81
-84
-84
-86
-98
-89
-79
-79
-79
-79
-79
-79
-57
-79
-79
-79
-79
-79
-79
-79
-41
-84
-96
-97
-79
-90
-98
-79
-79
-79
-79
-79
-79
-92
-83
-83
-82
-81
-83
-80
-85
-82
-81
-82
-82
-82
-82
-41
-82
-82
-82
-82
-82
-82
-83
-82
-82
-82
-82
-82
-98
-98
-79
-79
-79
-79
-79
-78
-97
-91
-96
-91
-82
-82
-82
-82
-82
-82
-77
-82
-82
-82
-82
-82
-82
-98
-79
-79
-79
-79
-79
-79
-94
-98
-96
-81
-82
-82
-82
-82
-82
-91
-91
-93
-91
-91
-91
-91
-93
-91
-91
-91
-91
-91
-92
-91
-91
-87
-84
-79
-79
-79
-79
-79
-78
-94
-79
-79
-79
-79
-80
-79
-94
-98
-82
-83
-82
-82
-83
-83
-82
-41
-81
-98
-98
-98
-86
-82
-99
-82
-82
-82
-82
-82
-82
-82
-82
-82
-81
-82
-82
-90
-79
-79
-79
-78
-78
-79
-79
-79
-78
-79
-79
-79
-98
-82
-81
-82
-82
-82
-82
-82
-82
-82
-82
-81
-81
-81
-90
-82
-81
-82
-82
-81
-81
-82
-82
-82
-80
-82
-81
-81
-81
-42
-61
-96
-82
-82
-82
-82
-82
-82
-82
-82
-82
-82
-82
-82
-82
-98
-98
-98
-98
-98
-41
-41
-98
-99
-84
-98
-41
-98
-98
-98
-85
-98
-96
-96
-91
-87
-98
-96
-99
-98
-90
-88
-86
-88
-96
-91
-82
-82
-82
-82
-82
-82
-82
-82
-82
-82
-82
-84
-93
-79
-79
-79
-79
-79
-79
-79
-79
-79
-79
-79
-79
-80
-80
-80
-79
-80
-80
-80
-80
-79
-79
-80
-80
-73
-80
-80
-80
-79
-78
-80
-80
-80
-80
-80
-79
-80
-74
-40
-40
-91
-40
-40
-79
-79
-79
-79
-79
-79
-79
-79
-79
-79
-91
-91
-90
-97
-40
-40
-91
-91
-40
-40
-82
-82
-82
-82
-82
-82
-82
-82
-82
-83
-82
-96
-79
-80
-80
-80
-80
-80
-80
-80
-80
-79
-80
-80
-80
-41
-40
-40
-40
-98
-80
-79
-79
-79
-79
-80
-80
-80
-80
-79
-80
-79
-40
-40
-40
-79
-79
-79
-79
-79
-79
-79
-79
-80
-80
-80
-79
-92
-83
-82
-83
-82
-82
-82
-83
-82
-81
-82
-82
-82
-90
-92
-82
-82
-83
-83
-83
-83
-83
-82
-82
-83
-83
-82
-42
-40
-40
-70
-82
-68
-80
-79
-80
-79
-80
-78
-80
-80
-80
-96
-80
-79
-80
-80
-80
-80
-79
-80
-80
-80
-80
-80
-60
-79
-80
-80
-80
-80
-80
-80
-80
-80
-79
-80
-80
-99
-80
-80
-80
-80
-80
-79
-80
-80
-80
-79
-80
-80
-99
-84
-83
-83
-83
-84
-83
-83
-83
-84
-84
-84
-84
-84
-48
-79
-80
-80
-80
-80
-79
-80
-79
-80
-80
-79
-80
-91
-91
-91
-92
-91
-92
-94
-79
-80
-80
-80
-80
-80
-80
-80
-80
-80
-80
-80
-80
-98
-80
-80
-80
-80
-80
-80
-80
-80
-80
-80
-80
-80
-58
-99
-98
-84
-84
-84
-84
-84
-84
-84
-84
-84
-84
-84
-84
-83
-98
-80
-92
-92
-87
-98
-98
-86
-98
-98
-95
-98
-97
-99
-97
-41
-72
-87
-84
-84
-83
-82
-84
-78
-78
-79
-79
-79
-83
-85
-94
-83
-86
-87
-96
-84
-86
-88
-98
-96
-95
-85
-90
-98
-98
-98
-80
-80
-95
-98
-98
-96
-98
-98
-80
-99
-96
-80
-98
-96
-94
-98
-96
-99
-80
-80
-80
-80
-80
-45
-80
-91
-80
-80
-80
-82
-80
-80
-80
-80
-80
-80
-80
-80
-80
-80
-80
-80
-41
-40
-80
-80
-80
-80
-80
-80
-80
-80
-80
-80
-80
-80
-91
-40
-97
-84
-84
-84
-84
-84
-84
-84
-85
-84
-81
-84
-85
-97
-85
-85
-86
-85
-85
-82
-85
-85
-85
-85
-85
-85
-87
-86
-85
-86
-86
-85
-84
-86
-84
-85
-86
-86
-70
-86
-86
-86
-86
-86
-86
-86
-86
-86
-86
-86
-86
-41
-94
-41
-40
-97
-80
-40
-91
-98
-80
-80
-80
-80
-80
-80
-80
-80
-80
-80
-80
-80
-93
-40
-93
-93
-40
-40
-93
-93
-98
-80
-80
-80
-80
-80
-80
-80
-81
-80
-80
-80
-80
-80
-80
-79
-80
-80
-80
-80
-80
-80
-80
-80
-80
-98
-40
-40
-93
-85
-85
-82
-82
-83
-86
-85
-86
-84
-85
-82
-83
-84
-85
-40
-40
-78
-40
-98
-98
-98
-99
-41
-80
-80
-78
-81
-79
-81
-81
-79
-81
-81
-81
-81
-96
-98
-80
-93
-80
-96
-98
-98
-80
-80
-80
-80
-80
-80
-80
-81
-81
-80
-80
-80
-98
-80
-80
-81
-80
-80
-80
-80
-80
-80
-81
-80
-80
-99
-90
-84
-82
-86
-85
-85
-85
-85
-86
-86
-85
-86
-86
-98
-96
-96
-80
-80
-80
-80
-80
-80
-80
-80
-80
-80
-80
-80
-80
-80
-80
-80
-80
-80
-80
-80
-80
-80
-79
-81
-80
-48
-90
-89
-79
-93
-91
-95
-80
-80
-80
-80
-80
-80
-80
-80
-80
-80
-80
-80
-80
-98
-95
-98
-80
-80
-80
-80
-80
-80
-80
-80
-80
-80
-80
-80
-80
-80
-80
-80
-41
-80
-80
-80
-80
-80
-80
-80
-80
-80
-80
-80
-80
-96
-98
-98
-99
-71
-98
-98
-99
-98
-98
-98
-98
-98 
