# Supplementary material for: Cluster‐Based Arithmetic Coding for Data Provenance Compression in Wireless Sensor Networks
Source: Hindawi journal article supplement (doi:10.1155/2018/9576978), 2018-01-01
Supplement: f1 [file 9576978.f1.zip › 9576978.f1/simulation code/arithmetic/Network.h]

#ifndef NETWORK_H
#define NETWORK_H

enum {
  AM_NETWORK= 6,     //AM数据包的类型
  TIMER_PERIOD_MILLI = 2000, //发送的时间间隔为2000ms
  l=0

};

//定义发送数据包的负载部分
typedef nx_struct NetworkMsg{
  nx_uint16_t nodeid;  //本节点的id
  nx_uint16_t sourceid;//源节点的id
  nx_uint16_t a;//左区间
  nx_uint16_t b;//右区间
  nx_uint16_t n1;
  nx_uint16_t n2;
  nx_uint16_t n3;
  nx_uint16_t n4;
  nx_uint16_t n5;
  nx_uint16_t n6;
  nx_uint16_t count;
} NetworkMsg;

#endif
