# Supplementary material for: Cluster‐Based Arithmetic Coding for Data Provenance Compression in Wireless Sensor Networks
Source: Hindawi journal article supplement (doi:10.1155/2018/9576978), 2018-01-01
Supplement: f1 [file 9576978.f1.zip › 9576978.f1/simulation code/arithmetic/simbuild/micaz/app.c]

#define nx_struct struct
#define nx_union union
#define dbg(mode, format, ...) ((void)0)
#define dbg_clear(mode, format, ...) ((void)0)
#define dbg_active(mode) 0
# 150 "/usr/lib/gcc/i686-linux-gnu/4.6/include/stddef.h" 3
typedef int ptrdiff_t;
#line 212
typedef unsigned int size_t;
#line 324
typedef int wchar_t;
# 8 "/usr/lib/ncc/deputy_nodeputy.h"
struct __nesc_attr_nonnull {
#line 8
  int dummy;
}  ;
#line 9
struct __nesc_attr_bnd {
#line 9
  void *lo, *hi;
}  ;
#line 10
struct __nesc_attr_bnd_nok {
#line 10
  void *lo, *hi;
}  ;
#line 11
struct __nesc_attr_count {
#line 11
  int n;
}  ;
#line 12
struct __nesc_attr_count_nok {
#line 12
  int n;
}  ;
#line 13
struct __nesc_attr_one {
#line 13
  int dummy;
}  ;
#line 14
struct __nesc_attr_one_nok {
#line 14
  int dummy;
}  ;
#line 15
struct __nesc_attr_dmemset {
#line 15
  int a1, a2, a3;
}  ;
#line 16
struct __nesc_attr_dmemcpy {
#line 16
  int a1, a2, a3;
}  ;
#line 17
struct __nesc_attr_nts {
#line 17
  int dummy;
}  ;
# 37 "/usr/include/stdint.h" 3
typedef signed char int8_t;
typedef short int int16_t;
typedef int int32_t;


__extension__ 
typedef long long int int64_t;


typedef unsigned char uint8_t;
typedef unsigned short int uint16_t;

typedef unsigned int uint32_t;


__extension__ 
typedef unsigned long long int uint64_t;


typedef signed char int_least8_t;
typedef short int int_least16_t;
typedef int int_least32_t;


__extension__ 
typedef long long int int_least64_t;


typedef unsigned char uint_least8_t;
typedef unsigned short int uint_least16_t;
typedef unsigned int uint_least32_t;


__extension__ 
typedef unsigned long long int uint_least64_t;


typedef signed char int_fast8_t;


typedef int int_fast16_t;
typedef int int_fast32_t;
__extension__ 
typedef long long int int_fast64_t;


typedef unsigned char uint_fast8_t;


typedef unsigned int uint_fast16_t;
typedef unsigned int uint_fast32_t;
__extension__ 
typedef unsigned long long int uint_fast64_t;
#line 126
typedef int intptr_t;


typedef unsigned int uintptr_t;


__extension__ 
typedef long long int intmax_t;
__extension__ 
typedef unsigned long long int uintmax_t;
# 35 "/usr/include/inttypes.h" 3
typedef int __gwchar_t;
#line 292
#line 288
typedef struct __nesc_unnamed4242 {

  long long int quot;
  long long int rem;
} imaxdiv_t;
# 281 "/usr/lib/ncc/nesc_nx.h"
static __inline uint8_t __nesc_ntoh_uint8(const void * source)  ;


static __inline uint8_t __nesc_hton_uint8(void * target, uint8_t value)  ;
#line 303
static __inline int8_t __nesc_hton_int8(void * target, int8_t value)  ;


static __inline uint16_t __nesc_ntoh_uint16(const void * source)  ;


static __inline uint16_t __nesc_hton_uint16(void * target, uint16_t value)  ;
#line 431
typedef struct { unsigned char nxdata[1]; } __attribute__((packed)) nx_int8_t;typedef int8_t __nesc_nxbase_nx_int8_t  ;
typedef struct { unsigned char nxdata[2]; } __attribute__((packed)) nx_int16_t;typedef int16_t __nesc_nxbase_nx_int16_t  ;
typedef struct { unsigned char nxdata[4]; } __attribute__((packed)) nx_int32_t;typedef int32_t __nesc_nxbase_nx_int32_t  ;
typedef struct { unsigned char nxdata[8]; } __attribute__((packed)) nx_int64_t;typedef int64_t __nesc_nxbase_nx_int64_t  ;
typedef struct { unsigned char nxdata[1]; } __attribute__((packed)) nx_uint8_t;typedef uint8_t __nesc_nxbase_nx_uint8_t  ;
typedef struct { unsigned char nxdata[2]; } __attribute__((packed)) nx_uint16_t;typedef uint16_t __nesc_nxbase_nx_uint16_t  ;
typedef struct { unsigned char nxdata[4]; } __attribute__((packed)) nx_uint32_t;typedef uint32_t __nesc_nxbase_nx_uint32_t  ;
typedef struct { unsigned char nxdata[8]; } __attribute__((packed)) nx_uint64_t;typedef uint64_t __nesc_nxbase_nx_uint64_t  ;


typedef struct { unsigned char nxdata[1]; } __attribute__((packed)) nxle_int8_t;typedef int8_t __nesc_nxbase_nxle_int8_t  ;
typedef struct { unsigned char nxdata[2]; } __attribute__((packed)) nxle_int16_t;typedef int16_t __nesc_nxbase_nxle_int16_t  ;
typedef struct { unsigned char nxdata[4]; } __attribute__((packed)) nxle_int32_t;typedef int32_t __nesc_nxbase_nxle_int32_t  ;
typedef struct { unsigned char nxdata[8]; } __attribute__((packed)) nxle_int64_t;typedef int64_t __nesc_nxbase_nxle_int64_t  ;
typedef struct { unsigned char nxdata[1]; } __attribute__((packed)) nxle_uint8_t;typedef uint8_t __nesc_nxbase_nxle_uint8_t  ;
typedef struct { unsigned char nxdata[2]; } __attribute__((packed)) nxle_uint16_t;typedef uint16_t __nesc_nxbase_nxle_uint16_t  ;
typedef struct { unsigned char nxdata[4]; } __attribute__((packed)) nxle_uint32_t;typedef uint32_t __nesc_nxbase_nxle_uint32_t  ;
typedef struct { unsigned char nxdata[8]; } __attribute__((packed)) nxle_uint64_t;typedef uint64_t __nesc_nxbase_nxle_uint64_t  ;
# 44 "/usr/include/string.h" 3
extern void *memcpy(void *__restrict __dest, 
const void *__restrict __src, size_t __n) 
__attribute((__leaf__)) __attribute((__nothrow__)) __attribute((__nonnull__(1, 2))) ;
#line 65
extern void *memset(void *__s, int __c, size_t __n) __attribute((__leaf__)) __attribute((__nothrow__)) __attribute((__nonnull__(1))) ;


extern int memcmp(const void *__s1, const void *__s2, size_t __n) 
__attribute((__leaf__)) __attribute((__nothrow__)) __attribute((__pure__)) __attribute((__nonnull__(1, 2))) ;
#line 128
extern char *strcpy(char *__restrict __dest, const char *__restrict __src) 
__attribute((__leaf__)) __attribute((__nothrow__)) __attribute((__nonnull__(1, 2))) ;
#line 143
extern int strcmp(const char *__s1, const char *__s2) 
__attribute((__leaf__)) __attribute((__nothrow__)) __attribute((__pure__)) __attribute((__nonnull__(1, 2))) ;
# 40 "/usr/include/xlocale.h" 3
#line 28
typedef struct __locale_struct {


  struct __locale_data *__locales[13];


  const unsigned short int *__ctype_b;
  const int *__ctype_tolower;
  const int *__ctype_toupper;


  const char *__names[13];
} *__locale_t;


typedef __locale_t locale_t;
# 262 "/usr/include/string.h"
extern char *strrchr(const char *__s, int __c) 
__attribute((__leaf__)) __attribute((__nothrow__)) __attribute((__pure__)) __attribute((__nonnull__(1))) ;
#line 399
extern size_t strlen(const char *__s) 
__attribute((__leaf__)) __attribute((__nothrow__)) __attribute((__pure__)) __attribute((__nonnull__(1))) ;
# 67 "/usr/include/i386-linux-gnu/bits/waitstatus.h" 3
union wait {

  int w_status;
  struct __nesc_unnamed4243 {


    unsigned int __w_termsig : 7;
    unsigned int __w_coredump : 1;
    unsigned int __w_retcode : 8;
    unsigned int  : 16;
  } 


  __wait_terminated;
  struct __nesc_unnamed4244 {


    unsigned int __w_stopval : 8;
    unsigned int __w_stopsig : 8;
    unsigned int  : 16;
  } 


  __wait_stopped;
};
# 72 "/usr/include/stdlib.h" 3
#line 68
typedef union __nesc_unnamed4245 {

  union wait *__uptr;
  int *__iptr;
} __WAIT_STATUS __attribute((__transparent_union__)) ;
#line 102
#line 98
typedef struct __nesc_unnamed4246 {

  int quot;
  int rem;
} div_t;


#line 106
typedef struct __nesc_unnamed4247 {

  long int quot;
  long int rem;
} ldiv_t;


__extension__ 


#line 118
typedef struct __nesc_unnamed4248 {

  long long int quot;
  long long int rem;
} lldiv_t;
#line 158
__extension__ 
#line 195
__extension__ 


__extension__ 


__extension__ 


__extension__ 
# 31 "/usr/include/i386-linux-gnu/bits/types.h" 3
typedef unsigned char __u_char;
typedef unsigned short int __u_short;
typedef unsigned int __u_int;
typedef unsigned long int __u_long;


typedef signed char __int8_t;
typedef unsigned char __uint8_t;
typedef signed short int __int16_t;
typedef unsigned short int __uint16_t;
typedef signed int __int32_t;
typedef unsigned int __uint32_t;


__extension__ 
#line 47
typedef signed long long int __int64_t;
__extension__ 
#line 48
typedef unsigned long long int __uint64_t;


__extension__ 
#line 56
typedef long long int __quad_t;
__extension__ 
#line 57
typedef unsigned long long int __u_quad_t;
#line 134
__extension__ 
#line 134
typedef __u_quad_t __dev_t;
__extension__ 
#line 135
typedef unsigned int __uid_t;
__extension__ 
#line 136
typedef unsigned int __gid_t;
__extension__ 
#line 137
typedef unsigned long int __ino_t;
__extension__ 
#line 138
typedef __u_quad_t __ino64_t;
__extension__ 
#line 139
typedef unsigned int __mode_t;
__extension__ 
#line 140
typedef unsigned int __nlink_t;
__extension__ 
#line 141
typedef long int __off_t;
__extension__ 
#line 142
typedef __quad_t __off64_t;
__extension__ 
#line 143
typedef int __pid_t;
__extension__ 
#line 144
typedef struct __nesc_unnamed4249 {
#line 144
  int __val[2];
} 
#line 144
__fsid_t;
__extension__ 
#line 145
typedef long int __clock_t;
__extension__ 
#line 146
typedef unsigned long int __rlim_t;
__extension__ 
#line 147
typedef __u_quad_t __rlim64_t;
__extension__ 
#line 148
typedef unsigned int __id_t;
__extension__ 
#line 149
typedef long int __time_t;
__extension__ 
#line 150
typedef unsigned int __useconds_t;
__extension__ 
#line 151
typedef long int __suseconds_t;

__extension__ 
#line 153
typedef int __daddr_t;
__extension__ 
#line 154
typedef long int __swblk_t;
__extension__ 
#line 155
typedef int __key_t;


__extension__ 
#line 158
typedef int __clockid_t;


__extension__ 
#line 161
typedef void *__timer_t;


__extension__ 
#line 164
typedef long int __blksize_t;


__extension__ 
#line 169
typedef long int __blkcnt_t;
__extension__ 
#line 170
typedef __quad_t __blkcnt64_t;


__extension__ 
#line 173
typedef unsigned long int __fsblkcnt_t;
__extension__ 
#line 174
typedef __u_quad_t __fsblkcnt64_t;


__extension__ 
#line 177
typedef unsigned long int __fsfilcnt_t;
__extension__ 
#line 178
typedef __u_quad_t __fsfilcnt64_t;

__extension__ 
#line 180
typedef int __ssize_t;


typedef __off64_t __loff_t;
typedef __quad_t *__qaddr_t;
typedef char *__caddr_t;


__extension__ 
#line 189
typedef int __intptr_t;


__extension__ 
#line 192
typedef unsigned int __socklen_t;
# 34 "/usr/include/i386-linux-gnu/sys/types.h" 3
typedef __u_char u_char;
typedef __u_short u_short;
typedef __u_int u_int;
typedef __u_long u_long;
typedef __quad_t quad_t;
typedef __u_quad_t u_quad_t;
typedef __fsid_t fsid_t;


typedef __loff_t loff_t;


typedef __ino_t ino_t;
#line 61
typedef __dev_t dev_t;


typedef __gid_t gid_t;


typedef __mode_t mode_t;


typedef __nlink_t nlink_t;


typedef __uid_t uid_t;


typedef __off_t off_t;
#line 99
typedef __pid_t pid_t;


typedef __id_t id_t;


typedef __ssize_t ssize_t;


typedef __daddr_t daddr_t;
typedef __caddr_t caddr_t;


typedef __key_t key_t;
# 60 "/usr/include/time.h" 3
typedef __clock_t clock_t;
#line 76
typedef __time_t time_t;
#line 92
typedef __clockid_t clockid_t;
#line 104
typedef __timer_t timer_t;
# 151 "/usr/include/i386-linux-gnu/sys/types.h" 3
typedef unsigned long int ulong;
typedef unsigned short int ushort;
typedef unsigned int uint;
#line 201
typedef unsigned int u_int8_t __attribute((__mode__(__QI__))) ;
typedef unsigned int u_int16_t __attribute((__mode__(__HI__))) ;
typedef unsigned int u_int32_t __attribute((__mode__(__SI__))) ;
typedef unsigned int u_int64_t __attribute((__mode__(__DI__))) ;

typedef int register_t __attribute((__mode__(__word__))) ;
# 24 "/usr/include/i386-linux-gnu/bits/sigset.h" 3
typedef int __sig_atomic_t;


#line 29
typedef struct __nesc_unnamed4250 {

  unsigned long int __val[1024 / (8 * sizeof(unsigned long int ))];
} __sigset_t;
# 38 "/usr/include/i386-linux-gnu/sys/select.h" 3
typedef __sigset_t sigset_t;
# 120 "/usr/include/time.h" 3
struct timespec {

  __time_t tv_sec;
  long int tv_nsec;
};
# 31 "/usr/include/i386-linux-gnu/bits/time.h" 3
struct timeval {

  __time_t tv_sec;
  __suseconds_t tv_usec;
};
# 49 "/usr/include/i386-linux-gnu/sys/select.h" 3
typedef __suseconds_t suseconds_t;


typedef long int __fd_mask;
#line 76
#line 65
typedef struct __nesc_unnamed4251 {


  __fd_mask __fds_bits[1024 / (8 * (int )sizeof(__fd_mask ))];
} 

fd_set;


typedef __fd_mask fd_mask;
# 32 "/usr/include/i386-linux-gnu/sys/sysmacros.h" 3
__extension__ 


__extension__ 


__extension__ 
# 229 "/usr/include/i386-linux-gnu/sys/types.h" 3
typedef __blksize_t blksize_t;


typedef __blkcnt_t blkcnt_t;


typedef __fsblkcnt_t fsblkcnt_t;


typedef __fsfilcnt_t fsfilcnt_t;
# 36 "/usr/include/i386-linux-gnu/bits/pthreadtypes.h" 3
typedef unsigned long int pthread_t;


#line 39
typedef union __nesc_unnamed4252 {

  char __size[36];
  long int __align;
} pthread_attr_t;


#line 46
typedef struct __pthread_internal_slist {

  struct __pthread_internal_slist *__next;
} __pthread_slist_t;
#line 73
#line 54
typedef union __nesc_unnamed4253 {

  struct __pthread_mutex_s {

    int __lock;
    unsigned int __count;
    int __owner;


    int __kind;
    unsigned int __nusers;
    __extension__ union  {

      int __spins;
      __pthread_slist_t __list;
    } ;
  } __data;
  char __size[24];
  long int __align;
} pthread_mutex_t;


#line 75
typedef union __nesc_unnamed4254 {

  char __size[4];
  long int __align;
} pthread_mutexattr_t;
#line 99
#line 84
typedef union __nesc_unnamed4255 {

  struct __nesc_unnamed4256 {

    int __lock;
    unsigned int __futex;
    __extension__ unsigned long long int __total_seq;
    __extension__ unsigned long long int __wakeup_seq;
    __extension__ unsigned long long int __woken_seq;
    void *__mutex;
    unsigned int __nwaiters;
    unsigned int __broadcast_seq;
  } __data;
  char __size[48];
  __extension__ long long int __align;
} pthread_cond_t;


#line 101
typedef union __nesc_unnamed4257 {

  char __size[4];
  long int __align;
} pthread_condattr_t;


typedef unsigned int pthread_key_t;


typedef int pthread_once_t;
#line 139
#line 119
typedef union __nesc_unnamed4258 {

  struct __nesc_unnamed4259 {

    int __lock;
    unsigned int __nr_readers;
    unsigned int __readers_wakeup;
    unsigned int __writer_wakeup;
    unsigned int __nr_readers_queued;
    unsigned int __nr_writers_queued;


    unsigned char __flags;
    unsigned char __shared;
    unsigned char __pad1;
    unsigned char __pad2;
    int __writer;
  } __data;
  char __size[32];
  long int __align;
} pthread_rwlock_t;


#line 141
typedef union __nesc_unnamed4260 {

  char __size[8];
  long int __align;
} pthread_rwlockattr_t;


typedef volatile int pthread_spinlock_t;


#line 156
typedef union __nesc_unnamed4261 {

  char __size[20];
  long int __align;
} pthread_barrier_t;


#line 162
typedef union __nesc_unnamed4262 {

  char __size[4];
  int __align;
} pthread_barrierattr_t;
# 349 "/usr/include/stdlib.h" 3
struct random_data {

  int32_t *fptr;
  int32_t *rptr;
  int32_t *state;
  int rand_type;
  int rand_deg;
  int rand_sep;
  int32_t *end_ptr;
};
#line 418
struct drand48_data {

  unsigned short int __x[3];
  unsigned short int __old_x[3];
  unsigned short int __c;
  unsigned short int __init;
  unsigned long long int __a;
};
#line 471
extern void *malloc(size_t __size) __attribute((__leaf__)) __attribute((__nothrow__)) __attribute((__malloc__)) ;
#line 488
extern void free(void *__ptr) __attribute((__leaf__)) __attribute((__nothrow__)) ;
#line 742
typedef int (*__compar_fn_t)(const void *arg_0x4039ca98, const void *arg_0x4039cc30);
#line 776
__extension__ 
#line 793
__extension__ 
# 36 "/usr/include/i386-linux-gnu/bits/mathdef.h" 3
typedef long double float_t;

typedef long double double_t;
# 110 "/usr/include/i386-linux-gnu/bits/mathcalls.h" 3
extern double log(double __x) __attribute((__leaf__)) __attribute((__nothrow__)) ;
#line 155
extern double pow(double __x, double __y) __attribute((__leaf__)) __attribute((__nothrow__)) ;


extern double sqrt(double __x) __attribute((__leaf__)) __attribute((__nothrow__)) ;
#line 186
extern double floor(double __x) __attribute((__leaf__)) __attribute((__nothrow__)) __attribute((const)) ;
#line 252
extern double erfc(double arg_0x403e3da8) __attribute((__leaf__)) __attribute((__nothrow__)) ;
# 203 "/usr/include/math.h" 3
enum __nesc_unnamed4263 {

  FP_NAN, 

  FP_INFINITE, 

  FP_ZERO, 

  FP_SUBNORMAL, 

  FP_NORMAL
};
#line 303
#line 296
typedef enum __nesc_unnamed4264 {

  _IEEE_ = -1, 
  _SVID_, 
  _XOPEN_, 
  _POSIX_, 
  _ISOC_
} _LIB_VERSION_TYPE;
#line 321
struct exception {


  int type;
  char *name;
  double arg1;
  double arg2;
  double retval;
};
# 48 "/usr/include/ctype.h" 3
enum __nesc_unnamed4265 {

  _ISupper = 0 < 8 ? (1 << 0) << 8 : (1 << 0) >> 8, 
  _ISlower = 1 < 8 ? (1 << 1) << 8 : (1 << 1) >> 8, 
  _ISalpha = 2 < 8 ? (1 << 2) << 8 : (1 << 2) >> 8, 
  _ISdigit = 3 < 8 ? (1 << 3) << 8 : (1 << 3) >> 8, 
  _ISxdigit = 4 < 8 ? (1 << 4) << 8 : (1 << 4) >> 8, 
  _ISspace = 5 < 8 ? (1 << 5) << 8 : (1 << 5) >> 8, 
  _ISprint = 6 < 8 ? (1 << 6) << 8 : (1 << 6) >> 8, 
  _ISgraph = 7 < 8 ? (1 << 7) << 8 : (1 << 7) >> 8, 
  _ISblank = 8 < 8 ? (1 << 8) << 8 : (1 << 8) >> 8, 
  _IScntrl = 9 < 8 ? (1 << 9) << 8 : (1 << 9) >> 8, 
  _ISpunct = 10 < 8 ? (1 << 10) << 8 : (1 << 10) >> 8, 
  _ISalnum = 11 < 8 ? (1 << 11) << 8 : (1 << 11) >> 8
};
# 45 "/usr/include/stdio.h" 3
struct _IO_FILE;


typedef struct _IO_FILE FILE;
#line 65
typedef struct _IO_FILE __FILE;
# 95 "/usr/include/wchar.h" 3
#line 83
typedef struct __nesc_unnamed4266 {

  int __count;
  union __nesc_unnamed4267 {


    unsigned int __wch;


    char __wchb[4];
  } __value;
} __mbstate_t;
# 26 "/usr/include/_G_config.h" 3
#line 22
typedef struct __nesc_unnamed4268 {

  __off_t __pos;
  __mbstate_t __state;
} _G_fpos_t;


#line 27
typedef struct __nesc_unnamed4269 {

  __off64_t __pos;
  __mbstate_t __state;
} _G_fpos64_t;
#line 53
typedef int _G_int16_t __attribute((__mode__(__HI__))) ;
typedef int _G_int32_t __attribute((__mode__(__SI__))) ;
typedef unsigned int _G_uint16_t __attribute((__mode__(__HI__))) ;
typedef unsigned int _G_uint32_t __attribute((__mode__(__SI__))) ;
# 40 "/usr/lib/gcc/i686-linux-gnu/4.6/include/stdarg.h" 3
typedef __builtin_va_list __gnuc_va_list;
# 172 "/usr/include/libio.h" 3
struct _IO_jump_t;
#line 172
struct _IO_FILE;


typedef void _IO_lock_t;


struct _IO_marker {
  struct _IO_marker *_next;
  struct _IO_FILE *_sbuf;


  int _pos;
};
#line 208
enum __codecvt_result {

  __codecvt_ok, 
  __codecvt_partial, 
  __codecvt_error, 
  __codecvt_noconv
};
#line 273
struct _IO_FILE {
  int _flags;


  char *_IO_read_ptr;
  char *_IO_read_end;
  char *_IO_read_base;
  char *_IO_write_base;
  char *_IO_write_ptr;
  char *_IO_write_end;
  char *_IO_buf_base;
  char *_IO_buf_end;

  char *_IO_save_base;
  char *_IO_backup_base;
  char *_IO_save_end;

  struct _IO_marker *_markers;

  struct _IO_FILE *_chain;

  int _fileno;


  int _flags2;

  __off_t _old_offset;


  unsigned short _cur_column;
  signed char _vtable_offset;
  char _shortbuf[1];


  _IO_lock_t *_lock;


  __off64_t _offset;


  void *__pad1;
  void *__pad2;
  void *__pad3;
  void *__pad4;
  size_t __pad5;

  int _mode;

  char _unused2[15 * sizeof(int ) - 4 * sizeof(void *) - sizeof(size_t )];
};


typedef struct _IO_FILE _IO_FILE;


struct _IO_FILE_plus;

struct _IO_FILE_plus;
struct _IO_FILE_plus;
struct _IO_FILE_plus;
#line 366
typedef __ssize_t __io_read_fn(void *__cookie, char *__buf, size_t __nbytes);


typedef __ssize_t __io_write_fn(void *__cookie, const char *__buf, 
size_t __n);


typedef int __io_seek_fn(void *__cookie, __off64_t *__pos, int __w);


typedef int __io_close_fn(void *__cookie);
# 80 "/usr/include/stdio.h" 3
typedef __gnuc_va_list va_list;
#line 111
typedef _G_fpos_t fpos_t;
#line 169
struct _IO_FILE;
struct _IO_FILE;
struct _IO_FILE;
#line 243
extern int fflush(FILE *__stream);
#line 307
extern FILE *fdopen(int __fd, const char *__modes) __attribute((__leaf__)) __attribute((__nothrow__)) ;
#line 357
extern int fprintf(FILE *__restrict __stream, 
const char *__restrict __format, ...);


extern int printf(const char *__restrict __format, ...);


extern int vfprintf(FILE *__restrict __s, const char *__restrict __format, 
__gnuc_va_list __arg);
#line 387
extern int snprintf(char *__restrict __s, size_t __maxlen, 
const char *__restrict __format, ...) 
__attribute((__nothrow__)) __attribute((__format__(__printf__, 3, 4))) ;
#line 855
extern int fileno(FILE *__stream) __attribute((__leaf__)) __attribute((__nothrow__)) ;
# 65 "/opt/tinyos-2.1.2/tos/lib/tossim/tos.h"
typedef uint8_t bool;


enum __nesc_unnamed4270 {
#line 76
  FALSE = 0, TRUE = 1
};
extern uint16_t TOS_NODE_ID;
# 51 "/opt/tinyos-2.1.2/tos/lib/tossim/sim_tossim.h"
typedef long long int sim_time_t;

void sim_init();

void sim_end();

void sim_random_seed(int seed);
int sim_random();

sim_time_t sim_time();
void sim_set_time(sim_time_t time);
sim_time_t sim_ticks_per_sec();

unsigned long sim_node();
void sim_set_node(unsigned long node);

int sim_print_time(char *buf, int bufLen, sim_time_t time);
int sim_print_now(char *buf, int bufLen);
char *sim_time_string();

void sim_add_channel(char *channel, FILE *file);
bool sim_remove_channel(char *channel, FILE *file);

bool sim_run_next_event();
# 50 "/opt/tinyos-2.1.2/tos/lib/tossim/sim_event_queue.h"
struct sim_event;
typedef struct sim_event sim_event_t;

struct sim_event {
  sim_time_t time;
  unsigned long mote;
  bool force;

  bool cancelled;
  void *data;

  void (*handle)(sim_event_t *e);
  void (*cleanup)(sim_event_t *e);
};

static sim_event_t *sim_queue_allocate_event();

void sim_queue_init();
void sim_queue_insert(sim_event_t *event);
bool sim_queue_is_empty();
long long int sim_queue_peek_time();
sim_event_t *sim_queue_pop();

void sim_queue_cleanup_none(sim_event_t *e);
void sim_queue_cleanup_event(sim_event_t *e);
void sim_queue_cleanup_data(sim_event_t *e);
void sim_queue_cleanup_total(sim_event_t *e);
# 53 "/opt/tinyos-2.1.2/tos/lib/tossim/sim_mote.h"
long long int sim_mote_euid(int mote);
void sim_mote_set_euid(int mote, long long int euid);

long long int sim_mote_start_time(int mote);
void sim_mote_set_start_time(int mote, long long int t);

bool sim_mote_is_on(int mote);
void sim_mote_turn_on(int mote);
void sim_mote_turn_off(int mote);
int sim_mote_get_variable_info(int mote, char *name, void **addr, size_t *len);
void sim_mote_enqueue_boot_event(int mote);
# 65 "/opt/tinyos-2.1.2/tos/lib/tossim/sim_log.h"
static inline void sim_log_init();
static inline void sim_log_add_channel(char *output, FILE *file);
static inline bool sim_log_remove_channel(char *output, FILE *file);
static void sim_log_commit_change();

static void sim_log_debug(uint16_t id, char *string, const char *format, ...);
static void sim_log_error(uint16_t id, char *string, const char *format, ...);
static void sim_log_debug_clear(uint16_t id, char *string, const char *format, ...);
# 97 "/opt/tinyos-2.1.2/tos/lib/tossim/tos.h"
struct __nesc_attr_atmostonce {
};
#line 98
struct __nesc_attr_atleastonce {
};
#line 99
struct __nesc_attr_exactlyonce {
};
# 9 "/opt/tinyos-2.1.2/tos/lib/tossim/hashtable.h"
struct hashtable;
typedef struct hashtable hashtable_t;
#line 78
struct hashtable *
create_hashtable(unsigned int minsize, 
unsigned int (*hashfunction)(void *arg_0x4053f320), 
int (*key_eq_fn)(void *arg_0x4053f768, void *arg_0x4053f8e0));
#line 103
#line 102
int 
hashtable_insert(struct hashtable *h, void *k, void *v);
#line 120
void *
hashtable_search(struct hashtable *h, void *k);
# 47 "/opt/tinyos-2.1.2/tos/lib/tossim/sim_log.c"
enum __nesc_unnamed4271 {
  DEFAULT_CHANNEL_SIZE = 8
};


#line 51
typedef struct sim_log_output {
  int num;
  FILE **files;
} sim_log_output_t;


#line 56
typedef struct sim_log_channel {
  const char *name;
  int numOutputs;
  int size;
  FILE **outputs;
} sim_log_channel_t;

enum __nesc_unnamed4272 {
  SIM_LOG_OUTPUT_COUNT = 2187U
};

sim_log_output_t outputs[SIM_LOG_OUTPUT_COUNT];
struct hashtable *channelTable = (void *)0;


inline static unsigned int sim_log_hash(void *key);
inline static int sim_log_eq(void *key1, void *key2);
#line 84
static void fillInOutput(int id, char *name);
#line 159
static inline void sim_log_init();
#line 172
static inline void sim_log_add_channel(char *name, FILE *file);
#line 212
static inline bool sim_log_remove_channel(char *output, FILE *file);
#line 234
static void sim_log_commit_change();
#line 246
static void sim_log_debug(uint16_t id, char *string, const char *format, ...);
#line 261
static void sim_log_error(uint16_t id, char *string, const char *format, ...);
#line 276
static void sim_log_debug_clear(uint16_t id, char *string, const char *format, ...);
#line 306
inline static unsigned int sim_log_hash(void *key);


inline static int sim_log_eq(void *key1, void *key2);
# 65 "/opt/tinyos-2.1.2/tos/lib/tossim/heap.h"
#line 61
typedef struct heap {
  int size;
  void *data;
  int private_size;
} heap_t;

static inline void init_heap(heap_t *heap);

static inline int heap_is_empty(heap_t *heap);

static inline long long int heap_get_min_key(heap_t *heap);

static void *heap_pop_min_data(heap_t *heap, long long int *key);
static inline void heap_insert(heap_t *heap, void *data, long long int key);
# 58 "/opt/tinyos-2.1.2/tos/lib/tossim/heap.c"
const int STARTING_SIZE = 511;


#line 62
typedef struct node {
  void *data;
  long long int key;
} node_t;

static void down_heap(heap_t *heap, int findex);
static void up_heap(heap_t *heap, int findex);
static void swap(node_t *first, node_t *second);


static inline void init_heap(heap_t *heap);


static inline int is_empty(heap_t *heap);


static inline int heap_is_empty(heap_t *heap);


static inline long long int heap_get_min_key(heap_t *heap);
#line 114
static void *heap_pop_min_data(heap_t *heap, long long int *key);
#line 130
static inline void expand_heap(heap_t *heap);
#line 144
static inline void heap_insert(heap_t *heap, void *data, long long int key);
#line 158
static void swap(node_t *first, node_t *second);
#line 171
static void down_heap(heap_t *heap, int findex);
#line 197
static void up_heap(heap_t *heap, int findex);
# 44 "/opt/tinyos-2.1.2/tos/lib/tossim/sim_event_queue.c"
static heap_t eventHeap;

void sim_queue_init()   ;


void sim_queue_insert(sim_event_t *event)   ;


sim_event_t *sim_queue_pop()   ;


bool sim_queue_is_empty()   ;


long long int sim_queue_peek_time()   ;


void sim_queue_cleanup_none(sim_event_t *event)   ;


void sim_queue_cleanup_event(sim_event_t *event)   ;


void sim_queue_cleanup_data(sim_event_t *event)   ;


void sim_queue_cleanup_total(sim_event_t *event)   ;


static sim_event_t *sim_queue_allocate_event();
# 57 "/usr/include/i386-linux-gnu/sys/time.h" 3
struct timezone {

  int tz_minuteswest;
  int tz_dsttime;
};

typedef struct timezone *__restrict __timezone_ptr_t;


extern int gettimeofday(struct timeval *__restrict __tv, 
__timezone_ptr_t __tz) __attribute((__leaf__)) __attribute((__nothrow__)) __attribute((__nonnull__(1))) ;
#line 93
enum __itimer_which {


  ITIMER_REAL = 0, 


  ITIMER_VIRTUAL = 1, 


  ITIMER_PROF = 2
};


struct itimerval {


  struct timeval it_interval;

  struct timeval it_value;
};


typedef int __itimer_which_t;
# 51 "/opt/tinyos-2.1.2/tos/lib/tossim/sim_noise.h"
enum __nesc_unnamed4273 {
  NOISE_MIN = -115, 
  NOISE_MAX = -5, 
  NOISE_MIN_QUANTIZE = -115, 
  NOISE_QUANTIZE_INTERVAL = 5, 
  NOISE_BIN_SIZE = (NOISE_MAX - NOISE_MIN) / NOISE_QUANTIZE_INTERVAL + 1, 
  NOISE_HISTORY = 20, 
  NOISE_DEFAULT_ELEMENT_SIZE = 8, 
  NOISE_HASHTABLE_SIZE = 128, 
  NOISE_MIN_TRACE = 128, 
  NOISE_NUM_VALUES = NOISE_MAX - NOISE_MIN + 1
};


#line 64
typedef struct sim_noise_hash_t {
  char key[NOISE_HISTORY];
  int numElements;
  int size;
  char *elements;
  char flag;
  float dist[NOISE_NUM_VALUES];
} sim_noise_hash_t;
#line 83
#line 73
typedef struct sim_noise_node_t {
  char key[NOISE_HISTORY];
  char freqKey[NOISE_HISTORY];
  char lastNoiseVal;
  uint32_t noiseGenTime;
  struct hashtable *noiseTable;
  char *noiseTrace;
  uint32_t noiseTraceLen;
  uint32_t noiseTraceIndex;
  bool generated;
} sim_noise_node_t;

void sim_noise_init();

char sim_noise_generate(uint16_t node_id, uint32_t cur_t);
void sim_noise_trace_add(uint16_t node_id, char val);
void sim_noise_create_model(uint16_t node_id);
# 51 "/opt/tinyos-2.1.2/tos/lib/tossim/sim_tossim.c"
static sim_time_t sim_ticks;
static unsigned long current_node;
static int sim_seed;

static int __nesc_nido_resolve(int mote, char *varname, uintptr_t *addr, size_t *size);

void sim_init()   ;
#line 80
void sim_end()   ;


int sim_random()   ;
#line 102
void sim_random_seed(int seed)   ;


sim_time_t sim_time()   ;


void sim_set_time(sim_time_t t)   ;


sim_time_t sim_ticks_per_sec()   ;


unsigned long sim_node()   ;


void sim_set_node(unsigned long node)   ;


bool sim_run_next_event()   ;
#line 156
int sim_print_time(char *buf, int len, sim_time_t ftime)   ;
#line 179
int sim_print_now(char *buf, int len)   ;


char simTimeBuf[128];
char *sim_time_string()   ;


void sim_add_channel(char *channel, FILE *file)   ;


bool sim_remove_channel(char *channel, FILE *file)   ;
# 99 "/opt/tinyos-2.1.2/tos/lib/tossim/sim_csma.h"
int sim_csma_init_high();
int sim_csma_init_low();
int sim_csma_high();
int sim_csma_low();
int sim_csma_symbols_per_sec();
int sim_csma_bits_per_symbol();
int sim_csma_preamble_length();
int sim_csma_exponent_base();
int sim_csma_max_iterations();
int sim_csma_min_free_samples();
int sim_csma_rxtx_delay();
int sim_csma_ack_time();

void sim_csma_set_init_high(int val);
void sim_csma_set_init_low(int val);
void sim_csma_set_high(int val);
void sim_csma_set_low(int val);
void sim_csma_set_symbols_per_sec(int val);
void sim_csma_set_bits_per_symbol(int val);
void sim_csma_set_preamble_length(int val);
void sim_csma_set_exponent_base(int val);
void sim_csma_set_max_iterations(int val);
void sim_csma_set_min_free_samples(int val);
void sim_csma_set_rxtx_delay(int val);
void sim_csma_set_ack_time(int val);
# 44 "/opt/tinyos-2.1.2/tos/lib/tossim/sim_csma.c"
int csmaInitHigh = 640;
int csmaInitLow = 20;
int csmaHigh = 160;
int csmaLow = 20;
int csmaSymbolsPerSec = 65536;
int csmaBitsPerSymbol = 4;
int csmaPreambleLength = 12;
int csmaExponentBase = 1;
int csmaMaxIterations = 0;
int csmaMinFreeSamples = 1;
int csmaRxTxDelay = 11;
int csmaAckTime = 34;

int sim_csma_init_high()   ;


int sim_csma_init_low()   ;


int sim_csma_high()   ;


int sim_csma_low()   ;


int sim_csma_symbols_per_sec()   ;


int sim_csma_bits_per_symbol()   ;


int sim_csma_preamble_length()   ;


int sim_csma_exponent_base()   ;


int sim_csma_max_iterations()   ;


int sim_csma_min_free_samples()   ;


int sim_csma_rxtx_delay()   ;


int sim_csma_ack_time()   ;


void sim_csma_set_init_high(int val)   ;


void sim_csma_set_init_low(int val)   ;


void sim_csma_set_high(int val)   ;


void sim_csma_set_low(int val)   ;


void sim_csma_set_symbols_per_sec(int val)   ;


void sim_csma_set_bits_per_symbol(int val)   ;


void sim_csma_set_preamble_length(int val)   ;


void sim_csma_set_exponent_base(int val)   ;


void sim_csma_set_max_iterations(int val)   ;


void sim_csma_set_min_free_samples(int val)   ;


void sim_csma_set_rxtx_delay(int val)   ;


void sim_csma_set_ack_time(int val)   ;
# 57 "/opt/tinyos-2.1.2/tos/lib/tossim/sim_gain.h"
#line 53
typedef struct gain_entry {
  int mote;
  double gain;
  struct gain_entry *next;
} gain_entry_t;

void sim_gain_add(int src, int dest, double gain);
double sim_gain_value(int src, int dest);
bool sim_gain_connected(int src, int dest);
void sim_gain_remove(int src, int dest);
void sim_gain_set_noise_floor(int node, double mean, double range);
double sim_gain_sample_noise(int node);


void sim_gain_set_sensitivity(double value);
double sim_gain_sensitivity();

gain_entry_t *sim_gain_first(int src);
gain_entry_t *sim_gain_next(gain_entry_t *e);
# 6 "/opt/tinyos-2.1.2/tos/lib/tossim/sim_gain.c"
#line 3
typedef struct sim_gain_noise {
  double mean;
  double range;
} sim_gain_noise_t;


gain_entry_t *connectivity[1000 + 1];
sim_gain_noise_t localNoise[1000 + 1];
double sensitivity = 4.0;

static inline gain_entry_t *sim_gain_allocate_link(int mote);
void sim_gain_deallocate_link(gain_entry_t *linkToDelete);

gain_entry_t *sim_gain_first(int src)   ;


gain_entry_t *sim_gain_next(gain_entry_t *currentLink)   ;


void sim_gain_add(int src, int dest, double gain)   ;
#line 55
double sim_gain_value(int src, int dest)   ;
#line 73
bool sim_gain_connected(int src, int dest)   ;
#line 89
void sim_gain_remove(int src, int dest)   ;
#line 124
void sim_gain_set_noise_floor(int node, double mean, double range)   ;
#line 148
double sim_gain_sample_noise(int node)   ;
#line 161
static inline gain_entry_t *sim_gain_allocate_link(int mote);


void sim_gain_deallocate_link(gain_entry_t *linkToDelete)   ;


void sim_gain_set_sensitivity(double s)   ;


double sim_gain_sensitivity()   ;
# 39 "/opt/tinyos-2.1.2/tos/lib/tossim/randomlib.c"
static double randU[97];
#line 39
static double randC;
#line 39
static double randCD;
#line 39
static double randCM;
static int i97;
#line 40
static int j97;
static int test = FALSE;
#line 55
static inline void RandomInitialise(int ij, int kl);
#line 103
static double RandomUniform(void );
# 133 "/usr/include/time.h" 3
struct tm {

  int tm_sec;
  int tm_min;
  int tm_hour;
  int tm_mday;
  int tm_mon;
  int tm_year;
  int tm_wday;
  int tm_yday;
  int tm_isdst;


  long int tm_gmtoff;
  const char *tm_zone;
};
#line 161
struct itimerspec {

  struct timespec it_interval;
  struct timespec it_value;
};


struct sigevent;
# 233 "/usr/include/time.h"
struct tm;


struct tm;


struct tm;


struct tm;
# 46 "/opt/tinyos-2.1.2/tos/lib/tossim/randomlib.h"
static inline void RandomInitialise(int arg_0x40673558, int arg_0x406736b0);
static double RandomUniform(void );
# 51 "/opt/tinyos-2.1.2/tos/lib/tossim/sim_noise.c"
int numCase1 = 0;
int numCase2 = 0;
int numTotal = 0;


uint32_t FreqKeyNum = 0;

sim_noise_node_t noiseData[1000];

inline static unsigned int sim_noise_hash(void *key);
inline static int sim_noise_eq(void *key1, void *key2);

void makeNoiseModel(uint16_t node_id);
void makePmfDistr(uint16_t node_id);
uint8_t search_bin_num(char noise);

void sim_noise_init()   ;
#line 84
void sim_noise_create_model(uint16_t node_id)   ;
#line 97
void sim_noise_trace_add(uint16_t node_id, char noiseVal)   ;
#line 113
uint8_t search_bin_num(char noise)   ;


char search_noise_from_bin_num(int i)   ;


inline static unsigned int sim_noise_hash(void *key);


inline static int sim_noise_eq(void *key1, void *key2);


void sim_noise_add(uint16_t node_id, char noise)   ;
#line 192
void sim_noise_dist(uint16_t node_id)   ;
#line 245
void arrangeKey(uint16_t node_id)   ;


void makePmfDistr(uint16_t node_id)   ;
#line 283
int dummy;
static inline void sim_noise_alarm();


char sim_noise_gen(uint16_t node_id)   ;
#line 364
char sim_noise_generate(uint16_t node_id, uint32_t cur_t)   ;
#line 419
void makeNoiseModel(uint16_t node_id)   ;
# 59 "/opt/tinyos-2.1.2/tos/lib/tossim/sim_packet.h"
typedef struct sim_packet {
} 
#line 59
sim_packet_t;

void sim_packet_set_source(sim_packet_t *msg, uint16_t src);
uint16_t sim_packet_source(sim_packet_t *msg);

void sim_packet_set_destination(sim_packet_t *msg, uint16_t dest);
uint16_t sim_packet_destination(sim_packet_t *msg);

void sim_packet_set_length(sim_packet_t *msg, uint8_t len);
uint16_t sim_packet_length(sim_packet_t *msg);

void sim_packet_set_type(sim_packet_t *msg, uint8_t type);
uint8_t sim_packet_type(sim_packet_t *msg);

uint8_t *sim_packet_data(sim_packet_t *msg);
void sim_packet_set_strength(sim_packet_t *msg, uint16_t str);

void sim_packet_deliver(int node, sim_packet_t *msg, sim_time_t t);
uint8_t sim_packet_max_length(sim_packet_t *msg);

sim_packet_t *sim_packet_allocate();
void sim_packet_free(sim_packet_t *m);
# 6 "/opt/tinyos-2.1.2/tos/types/AM.h"
typedef nx_uint8_t nx_am_id_t;
typedef nx_uint8_t nx_am_group_t;
typedef nx_uint16_t nx_am_addr_t;

typedef uint8_t am_id_t;
typedef uint8_t am_group_t;
typedef uint16_t am_addr_t;

enum __nesc_unnamed4274 {
  AM_BROADCAST_ADDR = 0xffff
};


enum __nesc_unnamed4275 {
  TOS_AM_GROUP = 0x22, 
  TOS_AM_ADDRESS = 1
};
# 12 "/opt/tinyos-2.1.2/tos/lib/tossim/TossimRadioMsg.h"
#line 6
typedef nx_struct tossim_header {
  nx_am_addr_t dest;
  nx_am_addr_t src;
  nx_uint8_t length;
  nx_am_group_t group;
  nx_am_id_t type;
} __attribute__((packed)) tossim_header_t;


#line 14
typedef nx_struct tossim_footer {
  nxle_uint16_t crc;
} __attribute__((packed)) tossim_footer_t;


#line 18
typedef nx_struct tossim_metadata {
  nx_int8_t strength;
  nx_uint8_t ack;
  nx_uint16_t time;
} __attribute__((packed)) tossim_metadata_t;
# 83 "/opt/tinyos-2.1.2/tos/lib/serial/Serial.h"
typedef uint8_t uart_id_t;


enum __nesc_unnamed4276 {
  HDLC_FLAG_BYTE = 0x7e, 
  HDLC_CTLESC_BYTE = 0x7d
};


enum __nesc_unnamed4277 {
  TOS_SERIAL_ACTIVE_MESSAGE_ID = 0, 
  TOS_SERIAL_CC1000_ID = 1, 
  TOS_SERIAL_802_15_4_ID = 2, 
  TOS_SERIAL_UNKNOWN_ID = 255
};


enum __nesc_unnamed4278 {
  SERIAL_PROTO_ACK = 67, 
  SERIAL_PROTO_PACKET_ACK = 68, 
  SERIAL_PROTO_PACKET_NOACK = 69, 
  SERIAL_PROTO_PACKET_UNKNOWN = 255
};
#line 121
#line 109
typedef struct radio_stats {
  uint8_t version;
  uint8_t flags;
  uint8_t reserved;
  uint8_t platform;
  uint16_t MTU;
  uint16_t radio_crc_fail;
  uint16_t radio_queue_drops;
  uint16_t serial_crc_fail;
  uint16_t serial_tx_fail;
  uint16_t serial_short_packets;
  uint16_t serial_proto_drops;
} radio_stats_t;


#line 123
typedef nx_struct serial_header {
  nx_am_addr_t dest;
  nx_am_addr_t src;
  nx_uint8_t length;
  nx_am_group_t group;
  nx_am_id_t type;
} __attribute__((packed)) serial_header_t;


#line 131
typedef nx_struct serial_packet {
  serial_header_t header;
  nx_uint8_t data[];
} __attribute__((packed)) serial_packet_t;


#line 136
typedef nx_struct serial_metadata {
  nx_uint8_t ack;
} __attribute__((packed)) serial_metadata_t;
# 53 "/opt/tinyos-2.1.2/tos/lib/tossim/platform_message.h"
#line 50
typedef union message_header {
  tossim_header_t tossim;
  serial_header_t serial;
} message_header_t;


#line 55
typedef union message_footer {
  tossim_footer_t tossim;
} message_footer_t;


#line 59
typedef union message_metadata {
  tossim_metadata_t tossim;
} message_metadata_t;
# 19 "/opt/tinyos-2.1.2/tos/types/message.h"
#line 14
typedef nx_struct message_t {
  nx_uint8_t header[sizeof(message_header_t )];
  nx_uint8_t data[28];
  nx_uint8_t footer[sizeof(message_footer_t )];
  nx_uint8_t metadata[sizeof(message_metadata_t )];
} __attribute__((packed)) message_t;
# 48 "/opt/tinyos-2.1.2/tos/lib/tossim/sim_packet.c"
void active_message_deliver(int node, message_t *m, sim_time_t t);

inline static tossim_header_t *getHeader(message_t *msg);


void sim_packet_set_source(sim_packet_t *msg, uint16_t src)   ;


uint16_t sim_packet_source(sim_packet_t *msg)   ;


void sim_packet_set_destination(sim_packet_t *msg, uint16_t dest)   ;


uint16_t sim_packet_destination(sim_packet_t *msg)   ;


void sim_packet_set_length(sim_packet_t *msg, uint8_t length)   ;


uint16_t sim_packet_length(sim_packet_t *msg)   ;


void sim_packet_set_type(sim_packet_t *msg, uint8_t type)   ;


uint8_t sim_packet_type(sim_packet_t *msg)   ;


uint8_t *sim_packet_data(sim_packet_t *p)   ;


void sim_packet_set_strength(sim_packet_t *p, uint16_t str)   ;


void sim_packet_deliver(int node, sim_packet_t *msg, sim_time_t t)   ;


uint8_t sim_packet_max_length(sim_packet_t *msg)   ;


sim_packet_t *sim_packet_allocate()   ;


void sim_packet_free(sim_packet_t *p)   ;
# 51 "/opt/tinyos-2.1.2/tos/types/TinyError.h"
enum __nesc_unnamed4279 {
  SUCCESS = 0, 
  FAIL = 1, 
  ESIZE = 2, 
  ECANCEL = 3, 
  EOFF = 4, 
  EBUSY = 5, 
  EINVAL = 6, 
  ERETRY = 7, 
  ERESERVE = 8, 
  EALREADY = 9, 
  ENOMEM = 10, 
  ENOACK = 11, 
  ELAST = 11
};

typedef uint8_t error_t  ;

static inline error_t ecombine(error_t r1, error_t r2)  ;
# 41 "/opt/tinyos-2.1.2/tos/lib/timer/Timer.h"
typedef struct __nesc_unnamed4280 {
#line 41
  int notUsed;
} 
#line 41
TSecond;
typedef struct __nesc_unnamed4281 {
#line 42
  int notUsed;
} 
#line 42
TMilli;
typedef struct __nesc_unnamed4282 {
#line 43
  int notUsed;
} 
#line 43
T32khz;
typedef struct __nesc_unnamed4283 {
#line 44
  int notUsed;
} 
#line 44
TMicro;
# 4 "Network.h"
enum __nesc_unnamed4284 {
  AM_NETWORK = 6, 
  TIMER_PERIOD_MILLI = 2000, 
  l = 0
};
#line 24
#line 12
typedef nx_struct NetworkMsg {
  nx_uint16_t nodeid;
  nx_uint16_t sourceid;
  nx_uint16_t a;
  nx_uint16_t b;
  nx_uint16_t n1;
  nx_uint16_t n2;
  nx_uint16_t n3;
  nx_uint16_t n4;
  nx_uint16_t n5;
  nx_uint16_t n6;
  nx_uint16_t count;
} __attribute__((packed)) NetworkMsg;
# 25 "/opt/tinyos-2.1.2/tos/chips/atm128/sim/atm128_sim.h"
enum __nesc_unnamed4285 {

  ATM128_PINF = 0x00, 


  ATM128_PINE = 0x01, 


  ATM128_DDRE = 0x02, 


  ATM128_PORTE = 0x03, 


  ATM128_ADCW = 0x04, 

  ATM128_ADC = 0x04, 

  ATM128_ADCL = 0x04, 
  ATM128_ADCH = 0x05, 


  ATM128_ADCSR = 0x06, 
  ATM128_ADCSRA = 0x06, 


  ATM128_ADMUX = 0x07, 


  ATM128_ACSR = 0x08, 


  ATM128_UBRR0L = 0x09, 


  ATM128_UCSR0B = 0x0A, 


  ATM128_UCSR0A = 0x0B, 


  ATM128_UDR0 = 0x0C, 


  ATM128_SPCR = 0x0D, 


  ATM128_SPSR = 0x0E, 


  ATM128_SPDR = 0x0F, 


  ATM128_PIND = 0x10, 


  ATM128_DDRD = 0x11, 


  ATM128_PORTD = 0x12, 


  ATM128_PINC = 0x13, 


  ATM128_DDRC = 0x14, 


  ATM128_PORTC = 0x15, 


  ATM128_PINB = 0x16, 


  ATM128_DDRB = 0x17, 


  ATM128_PORTB = 0x18, 


  ATM128_PINA = 0x19, 


  ATM128_DDRA = 0x1A, 


  ATM128_PORTA = 0x1B, 


  ATM128_SFIOR = 0x20, 


  ATM128_WDTCR = 0x21, 


  ATM128_OCDR = 0x22, 


  ATM128_OCR2 = 0x23, 


  ATM128_TCNT2 = 0x24, 


  ATM128_TCCR2 = 0x25, 


  ATM128_ICR1 = 0x26, 
  ATM128_ICR1L = 0x26, 
  ATM128_ICR1H = 0x27, 


  ATM128_OCR1B = 0x28, 
  ATM128_OCR1BL = 0x28, 
  ATM128_OCR1BH = 0x29, 


  ATM128_OCR1A = 0x2A, 
  ATM128_OCR1AL = 0x2A, 
  ATM128_OCR1AH = 0x2B, 


  ATM128_TCNT1 = 0x2C, 
  ATM128_TCNT1L = 0x2C, 
  ATM128_TCNT1H = 0x2D, 


  ATM128_TCCR1B = 0x2E, 


  ATM128_TCCR1A = 0x2F, 


  ATM128_ASSR = 0x30, 


  ATM128_OCR0 = 0x31, 


  ATM128_TCNT0 = 0x32, 


  ATM128_TCCR0 = 0x33, 


  ATM128_MCUSR = 0x34, 
  ATM128_MCUCSR = 0x34, 


  ATM128_MCUCR = 0x35, 


  ATM128_TIFR = 0x36, 


  ATM128_TIMSK = 0x37, 


  ATM128_EIFR = 0x38, 


  ATM128_EIMSK = 0x39, 


  ATM128_EICRB = 0x3A, 


  ATM128_RAMPZ = 0x3B, 


  ATM128_XDIV = 0x3C, 


  ATM128_SREG = 0x3F, 


  ATM128_DDRF = 0x61, 


  ATM128_PORTF = 0x62, 


  ATM128_PING = 0x63, 


  ATM128_DDRG = 0x64, 


  ATM128_PORTG = 0x65, 


  ATM128_SPMCR = 0x68, 
  ATM128_SPMCSR = 0x68, 


  ATM128_EICRA = 0x6A, 


  ATM128_XMCRB = 0x6C, 


  ATM128_XMCRA = 0x6D, 


  ATM128_OSCCAL = 0x6F, 


  ATM128_TWBR = 0x70, 


  ATM128_TWSR = 0x71, 


  ATM128_TWAR = 0x72, 


  ATM128_TWDR = 0x73, 


  ATM128_TWCR = 0x74, 


  ATM128_OCR1C = 0x78, 
  ATM128_OCR1CL = 0x78, 
  ATM128_OCR1CH = 0x79, 


  ATM128_TCCR1C = 0x7A, 


  ATM128_ETIFR = 0x7C, 


  ATM128_ETIMSK = 0x7D, 


  ATM128_ICR3 = 0x80, 
  ATM128_ICR3L = 0x80, 
  ATM128_ICR3H = 0x81, 


  ATM128_OCR3C = 0x82, 
  ATM128_OCR3CL = 0x82, 
  ATM128_OCR3CH = 0x83, 


  ATM128_OCR3B = 0x84, 
  ATM128_OCR3BL = 0x84, 
  ATM128_OCR3BH = 0x85, 


  ATM128_OCR3A = 0x86, 
  ATM128_OCR3AL = 0x86, 
  ATM128_OCR3AH = 0x87, 


  ATM128_TCNT3 = 0x88, 
  ATM128_TCNT3L = 0x88, 
  ATM128_TCNT3H = 0x89, 


  ATM128_TCCR3B = 0x8A, 


  ATM128_TCCR3A = 0x8B, 


  ATM128_TCCR3C = 0x8C, 


  ATM128_UBRR0H = 0x90, 


  ATM128_UCSR0C = 0x95, 


  ATM128_UBRR1H = 0x98, 


  ATM128_UBRR1L = 0x99, 


  ATM128_UCSR1B = 0x9A, 


  ATM128_UCSR1A = 0x9B, 


  ATM128_UDR1 = 0x9C, 


  ATM128_UCSR1C = 0x9D
};
#line 673
enum __nesc_unnamed4286 {

  TWINT = 7, 
  TWEA = 6, 
  TWSTA = 5, 
  TWSTO = 4, 
  TWWC = 3, 
  TWEN = 2, 
  TWIE = 0, 


  TWA6 = 7, 
  TWA5 = 6, 
  TWA4 = 5, 
  TWA3 = 4, 
  TWA2 = 3, 
  TWA1 = 2, 
  TWA0 = 1, 
  TWGCE = 0, 


  TWS7 = 7, 
  TWS6 = 6, 
  TWS5 = 5, 
  TWS4 = 4, 
  TWS3 = 3, 
  TWPS1 = 1, 
  TWPS0 = 0, 


  SRL2 = 6, 
  SRL1 = 5, 
  SRL0 = 4, 
  SRW01 = 3, 
  SRW00 = 2, 
  SRW11 = 1, 


  XMBK = 7, 
  XMM2 = 2, 
  XMM1 = 1, 
  XMM0 = 0, 


  XDIVEN = 7, 
  XDIV6 = 6, 
  XDIV5 = 5, 
  XDIV4 = 4, 
  XDIV3 = 3, 
  XDIV2 = 2, 
  XDIV1 = 1, 
  XDIV0 = 0, 


  RAMPZ0 = 0, 


  ISC31 = 7, 
  ISC30 = 6, 
  ISC21 = 5, 
  ISC20 = 4, 
  ISC11 = 3, 
  ISC10 = 2, 
  ISC01 = 1, 
  ISC00 = 0, 


  ISC71 = 7, 
  ISC70 = 6, 
  ISC61 = 5, 
  ISC60 = 4, 
  ISC51 = 3, 
  ISC50 = 2, 
  ISC41 = 1, 
  ISC40 = 0, 


  SPMIE = 7, 
  RWWSB = 6, 
  RWWSRE = 4, 
  BLBSET = 3, 
  PGWRT = 2, 
  PGERS = 1, 
  SPMEN = 0, 


  INT7 = 7, 
  INT6 = 6, 
  INT5 = 5, 
  INT4 = 4, 
  INT3 = 3, 
  INT2 = 2, 
  INT1 = 1, 
  INT0 = 0, 


  INTF7 = 7, 
  INTF6 = 6, 
  INTF5 = 5, 
  INTF4 = 4, 
  INTF3 = 3, 
  INTF2 = 2, 
  INTF1 = 1, 
  INTF0 = 0, 


  OCIE2 = 7, 
  TOIE2 = 6, 
  TICIE1 = 5, 
  OCIE1A = 4, 
  OCIE1B = 3, 
  TOIE1 = 2, 
  OCIE0 = 1, 
  TOIE0 = 0, 


  OCF2 = 7, 
  TOV2 = 6, 
  ICF1 = 5, 
  OCF1A = 4, 
  OCF1B = 3, 
  TOV1 = 2, 
  OCF0 = 1, 
  TOV0 = 0, 


  TICIE3 = 5, 
  OCIE3A = 4, 
  OCIE3B = 3, 
  TOIE3 = 2, 
  OCIE3C = 1, 
  OCIE1C = 0, 


  ICF3 = 5, 
  OCF3A = 4, 
  OCF3B = 3, 
  TOV3 = 2, 
  OCF3C = 1, 
  OCF1C = 0, 


  SRE = 7, 
  SRW = 6, 
  SRW10 = 6, 
  SE = 5, 
  SM1 = 4, 
  SM0 = 3, 
  SM2 = 2, 
  IVSEL = 1, 
  IVCE = 0, 


  JTD = 7, 
  JTRF = 4, 
  WDRF = 3, 
  BORF = 2, 
  EXTRF = 1, 
  PORF = 0, 


  FOC = 7, 
  WGM0 = 6, 
  COM1 = 5, 
  COM0 = 4, 
  WGM1 = 3, 
  CS2 = 2, 
  CS1 = 1, 
  CS0 = 0, 


  FOC0 = 7, 
  WGM00 = 6, 
  COM01 = 5, 
  COM00 = 4, 
  WGM01 = 3, 
  CS02 = 2, 
  CS01 = 1, 
  CS00 = 0, 


  FOC2 = 7, 
  WGM20 = 6, 
  COM21 = 5, 
  COM20 = 4, 
  WGM21 = 3, 
  CS22 = 2, 
  CS21 = 1, 
  CS20 = 0, 


  AS0 = 3, 
  TCN0UB = 2, 
  OCR0UB = 1, 
  TCR0UB = 0, 


  COMA1 = 7, 
  COMA0 = 6, 
  COMB1 = 5, 
  COMB0 = 4, 
  COMC1 = 3, 
  COMC0 = 2, 
  WGMA1 = 1, 
  WGMA0 = 0, 


  COM1A1 = 7, 
  COM1A0 = 6, 
  COM1B1 = 5, 
  COM1B0 = 4, 
  COM1C1 = 3, 
  COM1C0 = 2, 
  WGM11 = 1, 
  WGM10 = 0, 


  COM3A1 = 7, 
  COM3A0 = 6, 
  COM3B1 = 5, 
  COM3B0 = 4, 
  COM3C1 = 3, 
  COM3C0 = 2, 
  WGM31 = 1, 
  WGM30 = 0, 


  ICNC = 7, 
  ICES = 6, 
  WGMB3 = 4, 
  WGMB2 = 3, 
  CSB2 = 2, 
  CSB1 = 1, 
  CSB0 = 0, 


  ICNC1 = 7, 
  ICES1 = 6, 
  WGM13 = 4, 
  WGM12 = 3, 
  CS12 = 2, 
  CS11 = 1, 
  CS10 = 0, 


  ICNC3 = 7, 
  ICES3 = 6, 
  WGM33 = 4, 
  WGM32 = 3, 
  CS32 = 2, 
  CS31 = 1, 
  CS30 = 0, 


  FOCA = 7, 
  FOCB = 6, 
  FOCC = 5, 


  FOC3A = 7, 
  FOC3B = 6, 
  FOC3C = 5, 


  FOC1A = 7, 
  FOC1B = 6, 
  FOC1C = 5, 


  IDRD = 7, 
  OCDR7 = 7, 
  OCDR6 = 6, 
  OCDR5 = 5, 
  OCDR4 = 4, 
  OCDR3 = 3, 
  OCDR2 = 2, 
  OCDR1 = 1, 
  OCDR0 = 0, 


  WDCE = 4, 
  WDE = 3, 
  WDP2 = 2, 
  WDP1 = 1, 
  WDP0 = 0, 


  TSM = 7, 
  ADHSM = 4, 
  ACME = 3, 
  PUD = 2, 
  PSR0 = 1, 
  PSR321 = 0, 


  SPIF = 7, 
  WCOL = 6, 
  SPI2X = 0, 


  SPIE = 7, 
  SPE = 6, 
  DORD = 5, 
  MSTR = 4, 
  CPOL = 3, 
  CPHA = 2, 
  SPR1 = 1, 
  SPR0 = 0, 


  UMSEL = 6, 
  UPM1 = 5, 
  UPM0 = 4, 
  USBS = 3, 
  UCSZ1 = 2, 
  UCSZ0 = 1, 
  UCPOL = 0, 


  UMSEL1 = 6, 
  UPM11 = 5, 
  UPM10 = 4, 
  USBS1 = 3, 
  UCSZ11 = 2, 
  UCSZ10 = 1, 
  UCPOL1 = 0, 


  UMSEL0 = 6, 
  UPM01 = 5, 
  UPM00 = 4, 
  USBS0 = 3, 
  UCSZ01 = 2, 
  UCSZ00 = 1, 
  UCPOL0 = 0, 


  RXC = 7, 
  TXC = 6, 
  UDRE = 5, 
  FE = 4, 
  DOR = 3, 
  UPE = 2, 
  U2X = 1, 
  MPCM = 0, 


  RXC1 = 7, 
  TXC1 = 6, 
  UDRE1 = 5, 
  FE1 = 4, 
  DOR1 = 3, 
  UPE1 = 2, 
  U2X1 = 1, 
  MPCM1 = 0, 


  RXC0 = 7, 
  TXC0 = 6, 
  UDRE0 = 5, 
  FE0 = 4, 
  DOR0 = 3, 
  UPE0 = 2, 
  U2X0 = 1, 
  MPCM0 = 0, 


  RXCIE = 7, 
  TXCIE = 6, 
  UDRIE = 5, 
  RXEN = 4, 
  TXEN = 3, 
  UCSZ = 2, 
  UCSZ2 = 2, 
  RXB8 = 1, 
  TXB8 = 0, 


  RXCIE1 = 7, 
  TXCIE1 = 6, 
  UDRIE1 = 5, 
  RXEN1 = 4, 
  TXEN1 = 3, 
  UCSZ12 = 2, 
  RXB81 = 1, 
  TXB81 = 0, 


  RXCIE0 = 7, 
  TXCIE0 = 6, 
  UDRIE0 = 5, 
  RXEN0 = 4, 
  TXEN0 = 3, 
  UCSZ02 = 2, 
  RXB80 = 1, 
  TXB80 = 0, 


  ACD = 7, 
  ACBG = 6, 
  ACO = 5, 
  ACI = 4, 
  ACIE = 3, 
  ACIC = 2, 
  ACIS1 = 1, 
  ACIS0 = 0, 


  ADEN = 7, 
  ADSC = 6, 
  ADFR = 5, 
  ADIF = 4, 
  ADIE = 3, 
  ADPS2 = 2, 
  ADPS1 = 1, 
  ADPS0 = 0, 


  REFS1 = 7, 
  REFS0 = 6, 
  ADLAR = 5, 
  MUX4 = 4, 
  MUX3 = 3, 
  MUX2 = 2, 
  MUX1 = 1, 
  MUX0 = 0, 


  PA7 = 7, 
  PA6 = 6, 
  PA5 = 5, 
  PA4 = 4, 
  PA3 = 3, 
  PA2 = 2, 
  PA1 = 1, 
  PA0 = 0, 


  DDA7 = 7, 
  DDA6 = 6, 
  DDA5 = 5, 
  DDA4 = 4, 
  DDA3 = 3, 
  DDA2 = 2, 
  DDA1 = 1, 
  DDA0 = 0, 


  PINA7 = 7, 
  PINA6 = 6, 
  PINA5 = 5, 
  PINA4 = 4, 
  PINA3 = 3, 
  PINA2 = 2, 
  PINA1 = 1, 
  PINA0 = 0, 


  PB7 = 7, 
  PB6 = 6, 
  PB5 = 5, 
  PB4 = 4, 
  PB3 = 3, 
  PB2 = 2, 
  PB1 = 1, 
  PB0 = 0, 


  DDB7 = 7, 
  DDB6 = 6, 
  DDB5 = 5, 
  DDB4 = 4, 
  DDB3 = 3, 
  DDB2 = 2, 
  DDB1 = 1, 
  DDB0 = 0, 


  PINB7 = 7, 
  PINB6 = 6, 
  PINB5 = 5, 
  PINB4 = 4, 
  PINB3 = 3, 
  PINB2 = 2, 
  PINB1 = 1, 
  PINB0 = 0, 


  PC7 = 7, 
  PC6 = 6, 
  PC5 = 5, 
  PC4 = 4, 
  PC3 = 3, 
  PC2 = 2, 
  PC1 = 1, 
  PC0 = 0, 


  DDC7 = 7, 
  DDC6 = 6, 
  DDC5 = 5, 
  DDC4 = 4, 
  DDC3 = 3, 
  DDC2 = 2, 
  DDC1 = 1, 
  DDC0 = 0, 


  PINC7 = 7, 
  PINC6 = 6, 
  PINC5 = 5, 
  PINC4 = 4, 
  PINC3 = 3, 
  PINC2 = 2, 
  PINC1 = 1, 
  PINC0 = 0, 


  PD7 = 7, 
  PD6 = 6, 
  PD5 = 5, 
  PD4 = 4, 
  PD3 = 3, 
  PD2 = 2, 
  PD1 = 1, 
  PD0 = 0, 


  DDD7 = 7, 
  DDD6 = 6, 
  DDD5 = 5, 
  DDD4 = 4, 
  DDD3 = 3, 
  DDD2 = 2, 
  DDD1 = 1, 
  DDD0 = 0, 


  PIND7 = 7, 
  PIND6 = 6, 
  PIND5 = 5, 
  PIND4 = 4, 
  PIND3 = 3, 
  PIND2 = 2, 
  PIND1 = 1, 
  PIND0 = 0, 


  PE7 = 7, 
  PE6 = 6, 
  PE5 = 5, 
  PE4 = 4, 
  PE3 = 3, 
  PE2 = 2, 
  PE1 = 1, 
  PE0 = 0, 


  DDE7 = 7, 
  DDE6 = 6, 
  DDE5 = 5, 
  DDE4 = 4, 
  DDE3 = 3, 
  DDE2 = 2, 
  DDE1 = 1, 
  DDE0 = 0, 


  PINE7 = 7, 
  PINE6 = 6, 
  PINE5 = 5, 
  PINE4 = 4, 
  PINE3 = 3, 
  PINE2 = 2, 
  PINE1 = 1, 
  PINE0 = 0, 


  PF7 = 7, 
  PF6 = 6, 
  PF5 = 5, 
  PF4 = 4, 
  PF3 = 3, 
  PF2 = 2, 
  PF1 = 1, 
  PF0 = 0, 


  DDF7 = 7, 
  DDF6 = 6, 
  DDF5 = 5, 
  DDF4 = 4, 
  DDF3 = 3, 
  DDF2 = 2, 
  DDF1 = 1, 
  DDF0 = 0, 


  PINF7 = 7, 
  PINF6 = 6, 
  PINF5 = 5, 
  PINF4 = 4, 
  PINF3 = 3, 
  PINF2 = 2, 
  PINF1 = 1, 
  PINF0 = 0, 


  PG4 = 4, 
  PG3 = 3, 
  PG2 = 2, 
  PG1 = 1, 
  PG0 = 0, 


  DDG4 = 4, 
  DDG3 = 3, 
  DDG2 = 2, 
  DDG1 = 1, 
  DDG0 = 0, 


  PING4 = 4, 
  PING3 = 3, 
  PING2 = 2, 
  PING1 = 1, 
  PING0 = 0
};
# 51 "/opt/tinyos-2.1.2/tos/chips/atm128/sim/atm128hardware.h"
uint8_t atm128RegFile[1000][0xa0];
#line 85
static __inline void __nesc_enable_interrupt();


static __inline void __nesc_disable_interrupt();


typedef uint8_t __nesc_atomic_t;


#line 97
__inline __nesc_atomic_t 
__nesc_atomic_start(void )  ;


#line 106
__inline void 
__nesc_atomic_end(__nesc_atomic_t original_SREG)  ;
#line 120
typedef uint8_t mcu_power_t  ;


enum __nesc_unnamed4287 {
  ATM128_POWER_IDLE = 0, 
  ATM128_POWER_ADC_NR = 1, 
  ATM128_POWER_EXT_STANDBY = 2, 
  ATM128_POWER_SAVE = 3, 
  ATM128_POWER_STANDBY = 4, 
  ATM128_POWER_DOWN = 5
};
# 43 "/opt/tinyos-2.1.2/tos/chips/atm128/adc/Atm128Adc.h"
enum __nesc_unnamed4288 {
  ATM128_ADC_VREF_OFF = 0, 
  ATM128_ADC_VREF_AVCC = 1, 
  ATM128_ADC_VREF_RSVD, 
  ATM128_ADC_VREF_2_56 = 3
};


enum __nesc_unnamed4289 {
  ATM128_ADC_RIGHT_ADJUST = 0, 
  ATM128_ADC_LEFT_ADJUST = 1
};


enum __nesc_unnamed4290 {
  ATM128_ADC_SNGL_ADC0 = 0, 
  ATM128_ADC_SNGL_ADC1, 
  ATM128_ADC_SNGL_ADC2, 
  ATM128_ADC_SNGL_ADC3, 
  ATM128_ADC_SNGL_ADC4, 
  ATM128_ADC_SNGL_ADC5, 
  ATM128_ADC_SNGL_ADC6, 
  ATM128_ADC_SNGL_ADC7, 
  ATM128_ADC_DIFF_ADC00_10x, 
  ATM128_ADC_DIFF_ADC10_10x, 
  ATM128_ADC_DIFF_ADC00_200x, 
  ATM128_ADC_DIFF_ADC10_200x, 
  ATM128_ADC_DIFF_ADC22_10x, 
  ATM128_ADC_DIFF_ADC32_10x, 
  ATM128_ADC_DIFF_ADC22_200x, 
  ATM128_ADC_DIFF_ADC32_200x, 
  ATM128_ADC_DIFF_ADC01_1x, 
  ATM128_ADC_DIFF_ADC11_1x, 
  ATM128_ADC_DIFF_ADC21_1x, 
  ATM128_ADC_DIFF_ADC31_1x, 
  ATM128_ADC_DIFF_ADC41_1x, 
  ATM128_ADC_DIFF_ADC51_1x, 
  ATM128_ADC_DIFF_ADC61_1x, 
  ATM128_ADC_DIFF_ADC71_1x, 
  ATM128_ADC_DIFF_ADC02_1x, 
  ATM128_ADC_DIFF_ADC12_1x, 
  ATM128_ADC_DIFF_ADC22_1x, 
  ATM128_ADC_DIFF_ADC32_1x, 
  ATM128_ADC_DIFF_ADC42_1x, 
  ATM128_ADC_DIFF_ADC52_1x, 
  ATM128_ADC_SNGL_1_23, 
  ATM128_ADC_SNGL_GND
};


#line 94
typedef struct __nesc_unnamed4291 {

  uint8_t mux : 5;
  uint8_t adlar : 1;
  uint8_t refs : 2;
} Atm128Admux_t;


enum __nesc_unnamed4292 {
  ATM128_ADC_PRESCALE_2 = 0, 
  ATM128_ADC_PRESCALE_2b, 
  ATM128_ADC_PRESCALE_4, 
  ATM128_ADC_PRESCALE_8, 
  ATM128_ADC_PRESCALE_16, 
  ATM128_ADC_PRESCALE_32, 
  ATM128_ADC_PRESCALE_64, 
  ATM128_ADC_PRESCALE_128, 


  ATM128_ADC_PRESCALE
};


enum __nesc_unnamed4293 {
  ATM128_ADC_ENABLE_OFF = 0, 
  ATM128_ADC_ENABLE_ON
};


enum __nesc_unnamed4294 {
  ATM128_ADC_START_CONVERSION_OFF = 0, 
  ATM128_ADC_START_CONVERSION_ON
};


enum __nesc_unnamed4295 {
  ATM128_ADC_FREE_RUNNING_OFF = 0, 
  ATM128_ADC_FREE_RUNNING_ON
};


enum __nesc_unnamed4296 {
  ATM128_ADC_INT_FLAG_OFF = 0, 
  ATM128_ADC_INT_FLAG_ON
};


enum __nesc_unnamed4297 {
  ATM128_ADC_INT_ENABLE_OFF = 0, 
  ATM128_ADC_INT_ENABLE_ON
};


#line 150
typedef struct __nesc_unnamed4298 {

  uint8_t adps : 3;
  uint8_t adie : 1;
  uint8_t adif : 1;
  uint8_t adfr : 1;
  uint8_t adsc : 1;
  uint8_t aden : 1;
} Atm128Adcsra_t;

typedef uint8_t Atm128_ADCH_t;
typedef uint8_t Atm128_ADCL_t;
# 54 "/opt/tinyos-2.1.2/tos/platforms/micaz/sim/platform_hardware.h"
enum __nesc_unnamed4299 {
  CHANNEL_RSSI = ATM128_ADC_SNGL_ADC0, 
  CHANNEL_THERMISTOR = ATM128_ADC_SNGL_ADC1, 
  CHANNEL_BATTERY = ATM128_ADC_SNGL_ADC7, 
  CHANNEL_BANDGAP = 30, 
  CHANNEL_GND = 31, 

  ATM128_TIMER0_TICKSPPS = 32768
};
# 41 "/opt/tinyos-2.1.2/tos/lib/tossim/SimMainP.nc"
static void __nesc_nido_initialise(int node);
# 43 "/opt/tinyos-2.1.2/tos/types/Leds.h"
enum __nesc_unnamed4300 {
  LEDS_LED0 = 1 << 0, 
  LEDS_LED1 = 1 << 1, 
  LEDS_LED2 = 1 << 2, 
  LEDS_LED3 = 1 << 3, 
  LEDS_LED4 = 1 << 4, 
  LEDS_LED5 = 1 << 5, 
  LEDS_LED6 = 1 << 6, 
  LEDS_LED7 = 1 << 7
};
# 52 "/opt/tinyos-2.1.2/tos/chips/atm128/timer/Atm128Timer.h"
enum __nesc_unnamed4301 {
  ATM128_CLK8_OFF = 0x0, 
  ATM128_CLK8_NORMAL = 0x1, 
  ATM128_CLK8_DIVIDE_8 = 0x2, 
  ATM128_CLK8_DIVIDE_32 = 0x3, 
  ATM128_CLK8_DIVIDE_64 = 0x4, 
  ATM128_CLK8_DIVIDE_128 = 0x5, 
  ATM128_CLK8_DIVIDE_256 = 0x6, 
  ATM128_CLK8_DIVIDE_1024 = 0x7
};

enum __nesc_unnamed4302 {
  ATM128_CLK16_OFF = 0x0, 
  ATM128_CLK16_NORMAL = 0x1, 
  ATM128_CLK16_DIVIDE_8 = 0x2, 
  ATM128_CLK16_DIVIDE_64 = 0x3, 
  ATM128_CLK16_DIVIDE_256 = 0x4, 
  ATM128_CLK16_DIVIDE_1024 = 0x5, 
  ATM128_CLK16_EXTERNAL_FALL = 0x6, 
  ATM128_CLK16_EXTERNAL_RISE = 0x7
};


enum __nesc_unnamed4303 {
  AVR_CLOCK_OFF = 0, 
  AVR_CLOCK_ON = 1, 
  AVR_CLOCK_DIVIDE_8 = 2
};


enum __nesc_unnamed4304 {
  ATM128_WAVE8_NORMAL = 0, 
  ATM128_WAVE8_PWM, 
  ATM128_WAVE8_CTC, 
  ATM128_WAVE8_PWM_FAST
};


enum __nesc_unnamed4305 {
  ATM128_COMPARE_OFF = 0, 
  ATM128_COMPARE_TOGGLE, 
  ATM128_COMPARE_CLEAR, 
  ATM128_COMPARE_SET
};
#line 108
#line 98
typedef union __nesc_unnamed4306 {

  uint8_t flat;
  struct __nesc_unnamed4307 {
    uint8_t cs : 3;
    uint8_t wgm1 : 1;
    uint8_t com : 2;
    uint8_t wgm0 : 1;
    uint8_t foc : 1;
  } bits;
} Atm128TimerControl_t;

typedef Atm128TimerControl_t Atm128_TCCR0_t;
typedef uint8_t Atm128_TCNT0_t;
typedef uint8_t Atm128_OCR0_t;

typedef Atm128TimerControl_t Atm128_TCCR2_t;
typedef uint8_t Atm128_TCNT2_t;
typedef uint8_t Atm128_OCR2_t;
#line 130
#line 120
typedef union __nesc_unnamed4308 {

  uint8_t flat;
  struct __nesc_unnamed4309 {
    uint8_t tcr0ub : 1;
    uint8_t ocr0ub : 1;
    uint8_t tcn0ub : 1;
    uint8_t as0 : 1;
    uint8_t rsvd : 4;
  } bits;
} Atm128Assr_t;
#line 146
#line 133
typedef union __nesc_unnamed4310 {

  uint8_t flat;
  struct __nesc_unnamed4311 {
    uint8_t toie0 : 1;
    uint8_t ocie0 : 1;
    uint8_t toie1 : 1;
    uint8_t ocie1b : 1;
    uint8_t ocie1a : 1;
    uint8_t ticie1 : 1;
    uint8_t toie2 : 1;
    uint8_t ocie2 : 1;
  } bits;
} Atm128_TIMSK_t;
#line 163
#line 150
typedef union __nesc_unnamed4312 {

  uint8_t flat;
  struct __nesc_unnamed4313 {
    uint8_t tov0 : 1;
    uint8_t ocf0 : 1;
    uint8_t tov1 : 1;
    uint8_t ocf1b : 1;
    uint8_t ocf1a : 1;
    uint8_t icf1 : 1;
    uint8_t tov2 : 1;
    uint8_t ocf2 : 1;
  } bits;
} Atm128_TIFR_t;
#line 178
#line 167
typedef union __nesc_unnamed4314 {

  uint8_t flat;
  struct __nesc_unnamed4315 {
    uint8_t psr321 : 1;
    uint8_t psr0 : 1;
    uint8_t pud : 1;
    uint8_t acme : 1;
    uint8_t rsvd : 3;
    uint8_t tsm : 1;
  } bits;
} Atm128_SFIOR_t;


enum __nesc_unnamed4316 {
  ATM128_TIMER_COMPARE_NORMAL = 0, 
  ATM128_TIMER_COMPARE_TOGGLE, 
  ATM128_TIMER_COMPARE_CLEAR, 
  ATM128_TIMER_COMPARE_SET
};
#line 202
#line 193
typedef union __nesc_unnamed4317 {

  uint8_t flat;
  struct __nesc_unnamed4318 {
    uint8_t wgm10 : 2;
    uint8_t comC : 2;
    uint8_t comB : 2;
    uint8_t comA : 2;
  } bits;
} Atm128TimerCtrlCompare_t;


typedef Atm128TimerCtrlCompare_t Atm128_TCCR1A_t;


typedef Atm128TimerCtrlCompare_t Atm128_TCCR3A_t;


enum __nesc_unnamed4319 {
  ATM128_WAVE16_NORMAL = 0, 
  ATM128_WAVE16_PWM_8BIT, 
  ATM128_WAVE16_PWM_9BIT, 
  ATM128_WAVE16_PWM_10BIT, 
  ATM128_WAVE16_CTC_COMPARE, 
  ATM128_WAVE16_PWM_FAST_8BIT, 
  ATM128_WAVE16_PWM_FAST_9BIT, 
  ATM128_WAVE16_PWM_FAST_10BIT, 
  ATM128_WAVE16_PWM_CAPTURE_LOW, 
  ATM128_WAVE16_PWM_COMPARE_LOW, 
  ATM128_WAVE16_PWM_CAPTURE_HIGH, 
  ATM128_WAVE16_PWM_COMPARE_HIGH, 
  ATM128_WAVE16_CTC_CAPTURE, 
  ATM128_WAVE16_RESERVED, 
  ATM128_WAVE16_PWM_FAST_CAPTURE, 
  ATM128_WAVE16_PWM_FAST_COMPARE
};
#line 241
#line 231
typedef union __nesc_unnamed4320 {

  uint8_t flat;
  struct __nesc_unnamed4321 {
    uint8_t cs : 3;
    uint8_t wgm32 : 2;
    uint8_t rsvd : 1;
    uint8_t ices1 : 1;
    uint8_t icnc1 : 1;
  } bits;
} Atm128TimerCtrlCapture_t;


typedef Atm128TimerCtrlCapture_t Atm128_TCCR1B_t;


typedef Atm128TimerCtrlCapture_t Atm128_TCCR3B_t;
#line 259
#line 250
typedef union __nesc_unnamed4322 {

  uint8_t flat;
  struct __nesc_unnamed4323 {
    uint8_t rsvd : 5;
    uint8_t focC : 1;
    uint8_t focB : 1;
    uint8_t focA : 1;
  } bits;
} Atm128TimerCtrlClock_t;


typedef Atm128TimerCtrlClock_t Atm128_TCCR1C_t;


typedef Atm128TimerCtrlClock_t Atm128_TCCR3C_t;


typedef uint8_t Atm128_TCNT1H_t;
typedef uint8_t Atm128_TCNT1L_t;
typedef uint8_t Atm128_TCNT3H_t;
typedef uint8_t Atm128_TCNT3L_t;


typedef uint8_t Atm128_OCR1AH_t;
typedef uint8_t Atm128_OCR1AL_t;
typedef uint8_t Atm128_OCR1BH_t;
typedef uint8_t Atm128_OCR1BL_t;
typedef uint8_t Atm128_OCR1CH_t;
typedef uint8_t Atm128_OCR1CL_t;


typedef uint8_t Atm128_OCR3AH_t;
typedef uint8_t Atm128_OCR3AL_t;
typedef uint8_t Atm128_OCR3BH_t;
typedef uint8_t Atm128_OCR3BL_t;
typedef uint8_t Atm128_OCR3CH_t;
typedef uint8_t Atm128_OCR3CL_t;


typedef uint8_t Atm128_ICR1H_t;
typedef uint8_t Atm128_ICR1L_t;
typedef uint8_t Atm128_ICR3H_t;
typedef uint8_t Atm128_ICR3L_t;
#line 309
#line 297
typedef union __nesc_unnamed4324 {

  uint8_t flat;
  struct __nesc_unnamed4325 {
    uint8_t ocie1c : 1;
    uint8_t ocie3c : 1;
    uint8_t toie3 : 1;
    uint8_t ocie3b : 1;
    uint8_t ocie3a : 1;
    uint8_t ticie3 : 1;
    uint8_t rsvd : 2;
  } bits;
} Atm128_ETIMSK_t;
#line 324
#line 312
typedef union __nesc_unnamed4326 {

  uint8_t flat;
  struct __nesc_unnamed4327 {
    uint8_t ocf1c : 1;
    uint8_t ocf3c : 1;
    uint8_t tov3 : 1;
    uint8_t ocf3b : 1;
    uint8_t ocf3a : 1;
    uint8_t icf3 : 1;
    uint8_t rsvd : 2;
  } bits;
} Atm128_ETIFR_t;
typedef TMilli NetworkC$Timer0$precision_tag;
typedef TMilli /*AlarmCounterMilliP.Atm128AlarmAsyncC*/Atm128AlarmAsyncC$0$precision;
typedef /*AlarmCounterMilliP.Atm128AlarmAsyncC*/Atm128AlarmAsyncC$0$precision /*AlarmCounterMilliP.Atm128AlarmAsyncC.Atm128AlarmAsyncP*/Atm128AlarmAsyncP$0$precision;
typedef /*AlarmCounterMilliP.Atm128AlarmAsyncC.Atm128AlarmAsyncP*/Atm128AlarmAsyncP$0$precision /*AlarmCounterMilliP.Atm128AlarmAsyncC.Atm128AlarmAsyncP*/Atm128AlarmAsyncP$0$Alarm$precision_tag;
typedef uint32_t /*AlarmCounterMilliP.Atm128AlarmAsyncC.Atm128AlarmAsyncP*/Atm128AlarmAsyncP$0$Alarm$size_type;
typedef /*AlarmCounterMilliP.Atm128AlarmAsyncC.Atm128AlarmAsyncP*/Atm128AlarmAsyncP$0$precision /*AlarmCounterMilliP.Atm128AlarmAsyncC.Atm128AlarmAsyncP*/Atm128AlarmAsyncP$0$Counter$precision_tag;
typedef uint32_t /*AlarmCounterMilliP.Atm128AlarmAsyncC.Atm128AlarmAsyncP*/Atm128AlarmAsyncP$0$Counter$size_type;
typedef uint8_t /*AlarmCounterMilliP.Atm128AlarmAsyncC.Atm128AlarmAsyncP*/Atm128AlarmAsyncP$0$Compare$size_type;
typedef uint8_t /*AlarmCounterMilliP.Atm128AlarmAsyncC.Atm128AlarmAsyncP*/Atm128AlarmAsyncP$0$Timer$timer_size;
typedef uint8_t HplAtm128Timer0AsyncP$Timer0$timer_size;
typedef uint8_t HplAtm128Timer0AsyncP$Compare$size_type;
typedef TMilli /*HilTimerMilliC.AlarmToTimerC*/AlarmToTimerC$0$precision_tag;
typedef /*HilTimerMilliC.AlarmToTimerC*/AlarmToTimerC$0$precision_tag /*HilTimerMilliC.AlarmToTimerC*/AlarmToTimerC$0$Alarm$precision_tag;
typedef uint32_t /*HilTimerMilliC.AlarmToTimerC*/AlarmToTimerC$0$Alarm$size_type;
typedef /*HilTimerMilliC.AlarmToTimerC*/AlarmToTimerC$0$precision_tag /*HilTimerMilliC.AlarmToTimerC*/AlarmToTimerC$0$Timer$precision_tag;
typedef TMilli /*HilTimerMilliC.VirtualizeTimerC*/VirtualizeTimerC$0$precision_tag;
typedef /*HilTimerMilliC.VirtualizeTimerC*/VirtualizeTimerC$0$precision_tag /*HilTimerMilliC.VirtualizeTimerC*/VirtualizeTimerC$0$TimerFrom$precision_tag;
typedef /*HilTimerMilliC.VirtualizeTimerC*/VirtualizeTimerC$0$precision_tag /*HilTimerMilliC.VirtualizeTimerC*/VirtualizeTimerC$0$Timer$precision_tag;
typedef TMilli /*HilTimerMilliC.CounterToLocalTimeC*/CounterToLocalTimeC$0$precision_tag;
typedef /*HilTimerMilliC.CounterToLocalTimeC*/CounterToLocalTimeC$0$precision_tag /*HilTimerMilliC.CounterToLocalTimeC*/CounterToLocalTimeC$0$LocalTime$precision_tag;
typedef /*HilTimerMilliC.CounterToLocalTimeC*/CounterToLocalTimeC$0$precision_tag /*HilTimerMilliC.CounterToLocalTimeC*/CounterToLocalTimeC$0$Counter$precision_tag;
typedef uint32_t /*HilTimerMilliC.CounterToLocalTimeC*/CounterToLocalTimeC$0$Counter$size_type;
enum AMQueueP$__nesc_unnamed4328 {
  AMQueueP$NUM_CLIENTS = 1U
};
# 62 "/opt/tinyos-2.1.2/tos/interfaces/Init.nc"
static error_t PlatformP$Init$init(void );
#line 62
static error_t MotePlatformP$SubInit$default$init(void );
#line 62
static error_t MotePlatformP$PlatformInit$init(void );
# 46 "/opt/tinyos-2.1.2/tos/interfaces/GeneralIO.nc"
static void /*HplAtm128GeneralIOC.PortA.Bit0*/HplAtm128GeneralIOPinP$0$IO$makeOutput(void );
#line 40
static void /*HplAtm128GeneralIOC.PortA.Bit0*/HplAtm128GeneralIOPinP$0$IO$set(void );


static void /*HplAtm128GeneralIOC.PortA.Bit1*/HplAtm128GeneralIOPinP$1$IO$makeOutput(void );
#line 40
static void /*HplAtm128GeneralIOC.PortA.Bit1*/HplAtm128GeneralIOPinP$1$IO$set(void );


static void /*HplAtm128GeneralIOC.PortA.Bit2*/HplAtm128GeneralIOPinP$2$IO$makeOutput(void );
#line 40
static void /*HplAtm128GeneralIOC.PortA.Bit2*/HplAtm128GeneralIOPinP$2$IO$set(void );


static void /*HplAtm128GeneralIOC.PortA.Bit4*/HplAtm128GeneralIOPinP$4$IO$makeInput(void );
#line 41
static void /*HplAtm128GeneralIOC.PortA.Bit4*/HplAtm128GeneralIOPinP$4$IO$clr(void );
# 62 "/opt/tinyos-2.1.2/tos/interfaces/Init.nc"
static error_t MeasureClockC$Init$init(void );
# 67 "/opt/tinyos-2.1.2/tos/interfaces/TaskBasic.nc"
static error_t SimSchedulerBasicP$TaskBasic$postTask(
# 49 "/opt/tinyos-2.1.2/tos/lib/tossim/SimSchedulerBasicP.nc"
uint8_t arg_0x407111b8);
# 75 "/opt/tinyos-2.1.2/tos/interfaces/TaskBasic.nc"
static void SimSchedulerBasicP$TaskBasic$default$runTask(
# 49 "/opt/tinyos-2.1.2/tos/lib/tossim/SimSchedulerBasicP.nc"
uint8_t arg_0x407111b8);
# 57 "/opt/tinyos-2.1.2/tos/interfaces/Scheduler.nc"
static void SimSchedulerBasicP$Scheduler$init(void );


static bool SimSchedulerBasicP$Scheduler$runNextTask(void );
# 44 "/opt/tinyos-2.1.2/tos/lib/tossim/SimMote.nc"
static void SimMoteP$SimMote$setEuid(long long int euid);


static int SimMoteP$SimMote$getVariableInfo(char *name, void **ptr, size_t *len);

static void SimMoteP$SimMote$turnOff(void );
#line 48
static void SimMoteP$SimMote$turnOn(void );
#line 43
static long long int SimMoteP$SimMote$getEuid(void );


static bool SimMoteP$SimMote$isOn(void );
#line 45
static long long int SimMoteP$SimMote$getStartTime(void );
# 80 "/opt/tinyos-2.1.2/tos/interfaces/AMSend.nc"
static error_t TossimActiveMessageC$AMSend$send(
# 47 "/opt/tinyos-2.1.2/tos/lib/tossim/TossimActiveMessageC.nc"
am_id_t arg_0x408c9108, 
# 80 "/opt/tinyos-2.1.2/tos/interfaces/AMSend.nc"
am_addr_t addr, 
#line 71
message_t * msg, 


uint8_t len);
# 78 "/opt/tinyos-2.1.2/tos/interfaces/Receive.nc"
static 
#line 74
message_t * 


TossimActiveMessageC$Snoop$default$receive(
# 49 "/opt/tinyos-2.1.2/tos/lib/tossim/TossimActiveMessageC.nc"
am_id_t arg_0x408c7178, 
# 71 "/opt/tinyos-2.1.2/tos/interfaces/Receive.nc"
message_t * msg, 
void * payload, 


uint8_t len);
# 78 "/opt/tinyos-2.1.2/tos/interfaces/Packet.nc"
static uint8_t TossimActiveMessageC$Packet$payloadLength(
#line 74
message_t * msg);
#line 126
static 
#line 123
void * 


TossimActiveMessageC$Packet$getPayload(
#line 121
message_t * msg, 


uint8_t len);
#line 106
static uint8_t TossimActiveMessageC$Packet$maxPayloadLength(void );
#line 94
static void TossimActiveMessageC$Packet$setPayloadLength(
#line 90
message_t * msg, 


uint8_t len);
# 78 "/opt/tinyos-2.1.2/tos/interfaces/Receive.nc"
static 
#line 74
message_t * 


TossimActiveMessageC$Receive$default$receive(
# 48 "/opt/tinyos-2.1.2/tos/lib/tossim/TossimActiveMessageC.nc"
am_id_t arg_0x408c9ac8, 
# 71 "/opt/tinyos-2.1.2/tos/interfaces/Receive.nc"
message_t * msg, 
void * payload, 


uint8_t len);
# 85 "/opt/tinyos-2.1.2/tos/lib/tossim/TossimPacketModel.nc"
static void TossimActiveMessageC$Model$receive(message_t *msg);
#line 76
static void TossimActiveMessageC$Model$sendDone(message_t *msg, error_t error);


static bool TossimActiveMessageC$Model$shouldAck(message_t *msg);
# 68 "/opt/tinyos-2.1.2/tos/interfaces/AMPacket.nc"
static am_addr_t TossimActiveMessageC$AMPacket$address(void );


static am_addr_t TossimActiveMessageC$AMPacket$destination(
#line 74
message_t * amsg);
#line 103
static void TossimActiveMessageC$AMPacket$setDestination(
#line 99
message_t * amsg, 


am_addr_t addr);
#line 147
static am_id_t TossimActiveMessageC$AMPacket$type(
#line 143
message_t * amsg);
#line 162
static void TossimActiveMessageC$AMPacket$setType(
#line 158
message_t * amsg, 


am_id_t t);
#line 136
static bool TossimActiveMessageC$AMPacket$isForMe(
#line 133
message_t * amsg);
# 75 "/opt/tinyos-2.1.2/tos/interfaces/TaskBasic.nc"
static void TossimPacketModelC$stopDoneTask$runTask(void );
# 57 "/opt/tinyos-2.1.2/tos/lib/tossim/TossimPacketModel.nc"
static error_t TossimPacketModelC$Packet$send(int node, message_t *msg, uint8_t len);
# 75 "/opt/tinyos-2.1.2/tos/interfaces/TaskBasic.nc"
static void TossimPacketModelC$sendDoneTask$runTask(void );
# 62 "/opt/tinyos-2.1.2/tos/interfaces/Init.nc"
static error_t TossimPacketModelC$Init$init(void );
# 75 "/opt/tinyos-2.1.2/tos/interfaces/TaskBasic.nc"
static void TossimPacketModelC$startDoneTask$runTask(void );
# 104 "/opt/tinyos-2.1.2/tos/interfaces/SplitControl.nc"
static error_t TossimPacketModelC$Control$start(void );
# 60 "/opt/tinyos-2.1.2/tos/lib/tossim/GainRadioModel.nc"
static void TossimPacketModelC$GainRadioModel$receive(message_t *msg);
#line 59
static void TossimPacketModelC$GainRadioModel$acked(message_t *msg);

static bool TossimPacketModelC$GainRadioModel$shouldAck(message_t *msg);
#line 48
static void CpmModelC$Model$putOnAirTo(int dest, 
message_t *msg, 
bool ack, 
sim_time_t endTime, 
double gain, 
double reverseGain);


static bool CpmModelC$Model$clearChannel(void );
static void CpmModelC$Model$setPendingTransmission(void );
# 60 "/opt/tinyos-2.1.2/tos/lib/tossim/ActiveMessageAddressC.nc"
static am_addr_t ActiveMessageAddressC$amAddress(void );
# 50 "/opt/tinyos-2.1.2/tos/interfaces/ActiveMessageAddress.nc"
static am_addr_t ActiveMessageAddressC$ActiveMessageAddress$amAddress(void );
# 62 "/opt/tinyos-2.1.2/tos/interfaces/Init.nc"
static error_t LedsP$Init$init(void );
# 83 "/opt/tinyos-2.1.2/tos/lib/timer/Timer.nc"
static void NetworkC$Timer0$fired(void );
# 113 "/opt/tinyos-2.1.2/tos/interfaces/SplitControl.nc"
static void NetworkC$AMControl$startDone(error_t error);
#line 138
static void NetworkC$AMControl$stopDone(error_t error);
# 60 "/opt/tinyos-2.1.2/tos/interfaces/Boot.nc"
static void NetworkC$Boot$booted(void );
# 110 "/opt/tinyos-2.1.2/tos/interfaces/AMSend.nc"
static void NetworkC$AMSend$sendDone(
#line 103
message_t * msg, 


error_t error);
# 78 "/opt/tinyos-2.1.2/tos/interfaces/Receive.nc"
static 
#line 74
message_t * 


NetworkC$Receive$receive(
#line 71
message_t * msg, 
void * payload, 


uint8_t len);
# 109 "/opt/tinyos-2.1.2/tos/lib/timer/Alarm.nc"
static /*AlarmCounterMilliP.Atm128AlarmAsyncC.Atm128AlarmAsyncP*/Atm128AlarmAsyncP$0$Alarm$size_type /*AlarmCounterMilliP.Atm128AlarmAsyncC.Atm128AlarmAsyncP*/Atm128AlarmAsyncP$0$Alarm$getNow(void );
#line 103
static void /*AlarmCounterMilliP.Atm128AlarmAsyncC.Atm128AlarmAsyncP*/Atm128AlarmAsyncP$0$Alarm$startAt(/*AlarmCounterMilliP.Atm128AlarmAsyncC.Atm128AlarmAsyncP*/Atm128AlarmAsyncP$0$Alarm$size_type t0, /*AlarmCounterMilliP.Atm128AlarmAsyncC.Atm128AlarmAsyncP*/Atm128AlarmAsyncP$0$Alarm$size_type dt);
#line 116
static /*AlarmCounterMilliP.Atm128AlarmAsyncC.Atm128AlarmAsyncP*/Atm128AlarmAsyncP$0$Alarm$size_type /*AlarmCounterMilliP.Atm128AlarmAsyncC.Atm128AlarmAsyncP*/Atm128AlarmAsyncP$0$Alarm$getAlarm(void );
#line 73
static void /*AlarmCounterMilliP.Atm128AlarmAsyncC.Atm128AlarmAsyncP*/Atm128AlarmAsyncP$0$Alarm$stop(void );
# 62 "/opt/tinyos-2.1.2/tos/interfaces/Init.nc"
static error_t /*AlarmCounterMilliP.Atm128AlarmAsyncC.Atm128AlarmAsyncP*/Atm128AlarmAsyncP$0$Init$init(void );
# 64 "/opt/tinyos-2.1.2/tos/lib/timer/Counter.nc"
static /*AlarmCounterMilliP.Atm128AlarmAsyncC.Atm128AlarmAsyncP*/Atm128AlarmAsyncP$0$Counter$size_type /*AlarmCounterMilliP.Atm128AlarmAsyncC.Atm128AlarmAsyncP*/Atm128AlarmAsyncP$0$Counter$get(void );
# 58 "/opt/tinyos-2.1.2/tos/chips/atm128/timer/HplAtm128Compare.nc"
static void /*AlarmCounterMilliP.Atm128AlarmAsyncC.Atm128AlarmAsyncP*/Atm128AlarmAsyncP$0$Compare$fired(void );
# 70 "/opt/tinyos-2.1.2/tos/chips/atm128/timer/HplAtm128Timer.nc"
static void /*AlarmCounterMilliP.Atm128AlarmAsyncC.Atm128AlarmAsyncP*/Atm128AlarmAsyncP$0$Timer$overflow(void );
#line 61
static HplAtm128Timer0AsyncP$Timer0$timer_size HplAtm128Timer0AsyncP$Timer0$get(void );
#line 110
static uint8_t HplAtm128Timer0AsyncP$Timer0$getScale(void );
#line 67
static void HplAtm128Timer0AsyncP$Timer0$set(HplAtm128Timer0AsyncP$Timer0$timer_size t);
# 44 "/opt/tinyos-2.1.2/tos/chips/atm128/timer/HplAtm128TimerAsync.nc"
static int HplAtm128Timer0AsyncP$TimerAsync$compareBusy(void );
#line 32
static void HplAtm128Timer0AsyncP$TimerAsync$setTimer0Asynchronous(void );
# 53 "/opt/tinyos-2.1.2/tos/chips/atm128/timer/HplAtm128TimerCtrl8.nc"
static Atm128_TIFR_t HplAtm128Timer0AsyncP$Timer0Ctrl$getInterruptFlag(void );
#line 46
static void HplAtm128Timer0AsyncP$Timer0Ctrl$setControl(Atm128TimerControl_t control);
# 48 "/opt/tinyos-2.1.2/tos/chips/atm128/timer/HplAtm128Compare.nc"
static HplAtm128Timer0AsyncP$Compare$size_type HplAtm128Timer0AsyncP$Compare$get(void );


static void HplAtm128Timer0AsyncP$Compare$set(HplAtm128Timer0AsyncP$Compare$size_type t);


static void HplAtm128Timer0AsyncP$Compare$start(void );
# 75 "/opt/tinyos-2.1.2/tos/interfaces/TaskBasic.nc"
static void /*HilTimerMilliC.AlarmToTimerC*/AlarmToTimerC$0$fired$runTask(void );
# 78 "/opt/tinyos-2.1.2/tos/lib/timer/Alarm.nc"
static void /*HilTimerMilliC.AlarmToTimerC*/AlarmToTimerC$0$Alarm$fired(void );
# 136 "/opt/tinyos-2.1.2/tos/lib/timer/Timer.nc"
static uint32_t /*HilTimerMilliC.AlarmToTimerC*/AlarmToTimerC$0$Timer$getNow(void );
#line 129
static void /*HilTimerMilliC.AlarmToTimerC*/AlarmToTimerC$0$Timer$startOneShotAt(uint32_t t0, uint32_t dt);
#line 78
static void /*HilTimerMilliC.AlarmToTimerC*/AlarmToTimerC$0$Timer$stop(void );
# 75 "/opt/tinyos-2.1.2/tos/interfaces/TaskBasic.nc"
static void /*HilTimerMilliC.VirtualizeTimerC*/VirtualizeTimerC$0$updateFromTimer$runTask(void );
# 83 "/opt/tinyos-2.1.2/tos/lib/timer/Timer.nc"
static void /*HilTimerMilliC.VirtualizeTimerC*/VirtualizeTimerC$0$TimerFrom$fired(void );
#line 83
static void /*HilTimerMilliC.VirtualizeTimerC*/VirtualizeTimerC$0$Timer$default$fired(
# 48 "/opt/tinyos-2.1.2/tos/lib/timer/VirtualizeTimerC.nc"
uint8_t arg_0x418bac70);
# 64 "/opt/tinyos-2.1.2/tos/lib/timer/Timer.nc"
static void /*HilTimerMilliC.VirtualizeTimerC*/VirtualizeTimerC$0$Timer$startPeriodic(
# 48 "/opt/tinyos-2.1.2/tos/lib/timer/VirtualizeTimerC.nc"
uint8_t arg_0x418bac70, 
# 64 "/opt/tinyos-2.1.2/tos/lib/timer/Timer.nc"
uint32_t dt);
# 82 "/opt/tinyos-2.1.2/tos/lib/timer/Counter.nc"
static void /*HilTimerMilliC.CounterToLocalTimeC*/CounterToLocalTimeC$0$Counter$overflow(void );
# 80 "/opt/tinyos-2.1.2/tos/interfaces/AMSend.nc"
static error_t /*NetworkAppC.AMSenderC.SenderC.AMQueueEntryP*/AMQueueEntryP$0$AMSend$send(am_addr_t addr, 
#line 71
message_t * msg, 


uint8_t len);
# 100 "/opt/tinyos-2.1.2/tos/interfaces/Send.nc"
static void /*NetworkAppC.AMSenderC.SenderC.AMQueueEntryP*/AMQueueEntryP$0$Send$sendDone(
#line 96
message_t * msg, 


error_t error);
# 110 "/opt/tinyos-2.1.2/tos/interfaces/AMSend.nc"
static void /*AMQueueP.AMQueueImplP*/AMQueueImplP$0$AMSend$sendDone(
# 48 "/opt/tinyos-2.1.2/tos/system/AMQueueImplP.nc"
am_id_t arg_0x4191b9f8, 
# 103 "/opt/tinyos-2.1.2/tos/interfaces/AMSend.nc"
message_t * msg, 


error_t error);
# 75 "/opt/tinyos-2.1.2/tos/interfaces/Send.nc"
static error_t /*AMQueueP.AMQueueImplP*/AMQueueImplP$0$Send$send(
# 46 "/opt/tinyos-2.1.2/tos/system/AMQueueImplP.nc"
uint8_t arg_0x4191b010, 
# 67 "/opt/tinyos-2.1.2/tos/interfaces/Send.nc"
message_t * msg, 


uint8_t len);
#line 100
static void /*AMQueueP.AMQueueImplP*/AMQueueImplP$0$Send$default$sendDone(
# 46 "/opt/tinyos-2.1.2/tos/system/AMQueueImplP.nc"
uint8_t arg_0x4191b010, 
# 96 "/opt/tinyos-2.1.2/tos/interfaces/Send.nc"
message_t * msg, 


error_t error);
# 75 "/opt/tinyos-2.1.2/tos/interfaces/TaskBasic.nc"
static void /*AMQueueP.AMQueueImplP*/AMQueueImplP$0$errorTask$runTask(void );
#line 75
static void /*AMQueueP.AMQueueImplP*/AMQueueImplP$0$CancelTask$runTask(void );
# 62 "/opt/tinyos-2.1.2/tos/interfaces/Init.nc"
static error_t PlatformP$MoteInit$init(void );
#line 62
static error_t PlatformP$MeasureClock$init(void );
# 51 "/opt/tinyos-2.1.2/tos/platforms/mica/PlatformP.nc"
static inline error_t PlatformP$Init$init(void );
# 62 "/opt/tinyos-2.1.2/tos/interfaces/Init.nc"
static error_t MotePlatformP$SubInit$init(void );
# 44 "/opt/tinyos-2.1.2/tos/interfaces/GeneralIO.nc"
static void MotePlatformP$SerialIdPin$makeInput(void );
#line 41
static void MotePlatformP$SerialIdPin$clr(void );
# 49 "/opt/tinyos-2.1.2/tos/platforms/micaz/MotePlatformP.nc"
static inline error_t MotePlatformP$PlatformInit$init(void );
#line 61
static inline error_t MotePlatformP$SubInit$default$init(void );
# 55 "/opt/tinyos-2.1.2/tos/chips/atm128/pins/sim/HplAtm128GeneralIOPinP.nc"
static __inline void /*HplAtm128GeneralIOC.PortA.Bit0*/HplAtm128GeneralIOPinP$0$IO$set(void );


static __inline void /*HplAtm128GeneralIOC.PortA.Bit0*/HplAtm128GeneralIOPinP$0$IO$makeOutput(void );
#line 55
static __inline void /*HplAtm128GeneralIOC.PortA.Bit1*/HplAtm128GeneralIOPinP$1$IO$set(void );


static __inline void /*HplAtm128GeneralIOC.PortA.Bit1*/HplAtm128GeneralIOPinP$1$IO$makeOutput(void );
#line 55
static __inline void /*HplAtm128GeneralIOC.PortA.Bit2*/HplAtm128GeneralIOPinP$2$IO$set(void );


static __inline void /*HplAtm128GeneralIOC.PortA.Bit2*/HplAtm128GeneralIOPinP$2$IO$makeOutput(void );
#line 59
static __inline void /*HplAtm128GeneralIOC.PortA.Bit4*/HplAtm128GeneralIOPinP$4$IO$clr(void );


static __inline void /*HplAtm128GeneralIOC.PortA.Bit4*/HplAtm128GeneralIOPinP$4$IO$makeInput(void );
# 21 "/opt/tinyos-2.1.2/tos/platforms/mica/sim/MeasureClockC.nc"
static inline error_t MeasureClockC$Init$init(void );
# 62 "/opt/tinyos-2.1.2/tos/interfaces/Init.nc"
static error_t SimMainP$SoftwareInit$init(void );
# 60 "/opt/tinyos-2.1.2/tos/interfaces/Boot.nc"
static void SimMainP$Boot$booted(void );
# 62 "/opt/tinyos-2.1.2/tos/interfaces/Init.nc"
static error_t SimMainP$PlatformInit$init(void );
# 57 "/opt/tinyos-2.1.2/tos/interfaces/Scheduler.nc"
static void SimMainP$Scheduler$init(void );


static bool SimMainP$Scheduler$runNextTask(void );
# 51 "/opt/tinyos-2.1.2/tos/lib/tossim/SimMainP.nc"
int sim_main_start_mote(void )   ;
# 75 "/opt/tinyos-2.1.2/tos/interfaces/TaskBasic.nc"
static void SimSchedulerBasicP$TaskBasic$runTask(
# 49 "/opt/tinyos-2.1.2/tos/lib/tossim/SimSchedulerBasicP.nc"
uint8_t arg_0x407111b8);


enum SimSchedulerBasicP$__nesc_unnamed4329 {

  SimSchedulerBasicP$NUM_TASKS = 7U, 
  SimSchedulerBasicP$NO_TASK = 255
};

uint8_t SimSchedulerBasicP$m_head[1000];
uint8_t SimSchedulerBasicP$m_tail[1000];
uint8_t SimSchedulerBasicP$m_next[1000][SimSchedulerBasicP$NUM_TASKS];


bool SimSchedulerBasicP$sim_scheduler_event_pending[1000];
sim_event_t SimSchedulerBasicP$sim_scheduler_event[1000];

static inline int SimSchedulerBasicP$sim_config_task_latency(void );


static void SimSchedulerBasicP$sim_scheduler_submit_event(void );


static inline void SimSchedulerBasicP$sim_scheduler_event_handle(sim_event_t *e);
#line 103
static inline void SimSchedulerBasicP$sim_scheduler_event_init(sim_event_t *e);
#line 120
static inline uint8_t SimSchedulerBasicP$popTask(void );
#line 139
static inline bool SimSchedulerBasicP$isWaiting(uint8_t id);


static inline bool SimSchedulerBasicP$pushTask(uint8_t id);
#line 166
static inline void SimSchedulerBasicP$Scheduler$init(void );
#line 180
static bool SimSchedulerBasicP$Scheduler$runNextTask(void );
#line 205
static error_t SimSchedulerBasicP$TaskBasic$postTask(uint8_t id);
#line 221
static inline void SimSchedulerBasicP$TaskBasic$default$runTask(uint8_t id);
# 50 "/opt/tinyos-2.1.2/tos/lib/tossim/SimMoteP.nc"
long long int SimMoteP$euid[1000];
long long int SimMoteP$startTime[1000];
bool SimMoteP$isOn[1000];
sim_event_t *SimMoteP$bootEvent[1000];

static inline long long int SimMoteP$SimMote$getEuid(void );


static inline void SimMoteP$SimMote$setEuid(long long int e);


static inline long long int SimMoteP$SimMote$getStartTime(void );


static inline bool SimMoteP$SimMote$isOn(void );


static inline int SimMoteP$SimMote$getVariableInfo(char *name, void **addr, size_t *size);


static void SimMoteP$SimMote$turnOn(void );
#line 85
static inline void SimMoteP$SimMote$turnOff(void );


long long int sim_mote_euid(int mote)   ;


void sim_mote_set_euid(int mote, long long int id)   ;


long long int sim_mote_start_time(int mote)   ;


int sim_mote_get_variable_info(int mote, char *name, void **ptr, size_t *len)   ;


void sim_mote_set_start_time(int mote, long long int t)   ;


bool sim_mote_is_on(int mote)   ;


void sim_mote_turn_on(int mote)   ;


void sim_mote_turn_off(int mote)   ;


static inline void SimMoteP$sim_mote_boot_handle(sim_event_t *e);


void sim_mote_enqueue_boot_event(int mote)   ;
# 57 "/opt/tinyos-2.1.2/tos/lib/tossim/TossimActiveMessageC.nc"
static am_addr_t TossimActiveMessageC$amAddress(void );
# 110 "/opt/tinyos-2.1.2/tos/interfaces/AMSend.nc"
static void TossimActiveMessageC$AMSend$sendDone(
# 47 "/opt/tinyos-2.1.2/tos/lib/tossim/TossimActiveMessageC.nc"
am_id_t arg_0x408c9108, 
# 103 "/opt/tinyos-2.1.2/tos/interfaces/AMSend.nc"
message_t * msg, 


error_t error);
# 78 "/opt/tinyos-2.1.2/tos/interfaces/Receive.nc"
static 
#line 74
message_t * 


TossimActiveMessageC$Snoop$receive(
# 49 "/opt/tinyos-2.1.2/tos/lib/tossim/TossimActiveMessageC.nc"
am_id_t arg_0x408c7178, 
# 71 "/opt/tinyos-2.1.2/tos/interfaces/Receive.nc"
message_t * msg, 
void * payload, 


uint8_t len);
#line 78
static 
#line 74
message_t * 


TossimActiveMessageC$Receive$receive(
# 48 "/opt/tinyos-2.1.2/tos/lib/tossim/TossimActiveMessageC.nc"
am_id_t arg_0x408c9ac8, 
# 71 "/opt/tinyos-2.1.2/tos/interfaces/Receive.nc"
message_t * msg, 
void * payload, 


uint8_t len);
# 57 "/opt/tinyos-2.1.2/tos/lib/tossim/TossimPacketModel.nc"
static error_t TossimActiveMessageC$Model$send(int node, message_t *msg, uint8_t len);
# 62 "/opt/tinyos-2.1.2/tos/lib/tossim/TossimActiveMessageC.nc"
message_t TossimActiveMessageC$buffer[1000];
message_t *TossimActiveMessageC$bufferPointer[1000];

static inline tossim_header_t *TossimActiveMessageC$getHeader(message_t *amsg);


static error_t TossimActiveMessageC$AMSend$send(am_id_t id, am_addr_t addr, 
message_t *amsg, 
uint8_t len);
#line 103
static inline void TossimActiveMessageC$Model$sendDone(message_t *msg, error_t result);


static void TossimActiveMessageC$Model$receive(message_t *msg);
#line 127
static inline bool TossimActiveMessageC$Model$shouldAck(message_t *msg);


static inline am_addr_t TossimActiveMessageC$AMPacket$address(void );


static am_addr_t TossimActiveMessageC$AMPacket$destination(message_t *amsg);


static inline void TossimActiveMessageC$AMPacket$setDestination(message_t *amsg, am_addr_t addr);
#line 160
static inline bool TossimActiveMessageC$AMPacket$isForMe(message_t *amsg);


static am_id_t TossimActiveMessageC$AMPacket$type(message_t *amsg);


static inline void TossimActiveMessageC$AMPacket$setType(message_t *amsg, am_id_t t);


static inline uint8_t TossimActiveMessageC$Packet$payloadLength(message_t *msg);


static inline void TossimActiveMessageC$Packet$setPayloadLength(message_t *msg, uint8_t len);


static inline uint8_t TossimActiveMessageC$Packet$maxPayloadLength(void );


static inline void *TossimActiveMessageC$Packet$getPayload(message_t *msg, uint8_t len);
#line 212
static inline message_t *TossimActiveMessageC$Receive$default$receive(am_id_t id, message_t *msg, void *payload, uint8_t len);


static inline message_t *TossimActiveMessageC$Snoop$default$receive(am_id_t id, message_t *msg, void *payload, uint8_t len);
#line 236
static inline void TossimActiveMessageC$active_message_deliver_handle(sim_event_t *evt);


static inline sim_event_t *TossimActiveMessageC$allocate_deliver_event(int node, message_t *msg, sim_time_t t);
#line 254
void active_message_deliver(int node, message_t *msg, sim_time_t t)   ;
# 85 "/opt/tinyos-2.1.2/tos/lib/tossim/TossimPacketModel.nc"
static void TossimPacketModelC$Packet$receive(message_t *msg);
#line 76
static void TossimPacketModelC$Packet$sendDone(message_t *msg, error_t error);


static bool TossimPacketModelC$Packet$shouldAck(message_t *msg);
# 67 "/opt/tinyos-2.1.2/tos/interfaces/TaskBasic.nc"
static error_t TossimPacketModelC$startDoneTask$postTask(void );
# 113 "/opt/tinyos-2.1.2/tos/interfaces/SplitControl.nc"
static void TossimPacketModelC$Control$startDone(error_t error);
#line 138
static void TossimPacketModelC$Control$stopDone(error_t error);
# 48 "/opt/tinyos-2.1.2/tos/lib/tossim/GainRadioModel.nc"
static void TossimPacketModelC$GainRadioModel$putOnAirTo(int dest, 
message_t *msg, 
bool ack, 
sim_time_t endTime, 
double gain, 
double reverseGain);


static bool TossimPacketModelC$GainRadioModel$clearChannel(void );
static void TossimPacketModelC$GainRadioModel$setPendingTransmission(void );
# 96 "/opt/tinyos-2.1.2/tos/lib/tossim/TossimPacketModelC.nc"
enum TossimPacketModelC$__nesc_unnamed4330 {
#line 96
  TossimPacketModelC$startDoneTask = 0U
};
#line 96
typedef int TossimPacketModelC$__nesc_sillytask_startDoneTask[TossimPacketModelC$startDoneTask];


enum TossimPacketModelC$__nesc_unnamed4331 {
#line 101
  TossimPacketModelC$stopDoneTask = 1U
};
#line 101
typedef int TossimPacketModelC$__nesc_sillytask_stopDoneTask[TossimPacketModelC$stopDoneTask];
#line 145
enum TossimPacketModelC$__nesc_unnamed4332 {
#line 145
  TossimPacketModelC$sendDoneTask = 2U
};
#line 145
typedef int TossimPacketModelC$__nesc_sillytask_sendDoneTask[TossimPacketModelC$sendDoneTask];
#line 70
bool TossimPacketModelC$initialized[1000];
bool TossimPacketModelC$running[1000];
uint8_t TossimPacketModelC$backoffCount[1000];
uint8_t TossimPacketModelC$neededFreeSamples[1000];
message_t *TossimPacketModelC$sending[1000];
bool TossimPacketModelC$transmitting[1000];
uint8_t TossimPacketModelC$sendingLength[1000];
int TossimPacketModelC$destNode[1000];
sim_event_t TossimPacketModelC$sendEvent[1000];


static inline tossim_metadata_t *TossimPacketModelC$getMetadata(message_t *msg);


static inline error_t TossimPacketModelC$Init$init(void );


static inline void TossimPacketModelC$startDoneTask$runTask(void );


static inline void TossimPacketModelC$stopDoneTask$runTask(void );


static error_t TossimPacketModelC$Control$start(void );
#line 145
static inline void TossimPacketModelC$sendDoneTask$runTask(void );
#line 159
static inline void TossimPacketModelC$start_csma(void );

static inline error_t TossimPacketModelC$Packet$send(int dest, message_t *msg, uint8_t len);
#line 183
static inline void TossimPacketModelC$send_backoff(sim_event_t *evt);
static inline void TossimPacketModelC$send_transmit(sim_event_t *evt);
static inline void TossimPacketModelC$send_transmit_done(sim_event_t *evt);

static inline void TossimPacketModelC$start_csma(void );
#line 211
static inline void TossimPacketModelC$send_backoff(sim_event_t *evt);
#line 253
static inline void TossimPacketModelC$send_transmit(sim_event_t *evt);
#line 280
static inline void TossimPacketModelC$send_transmit_done(sim_event_t *evt);


static inline void TossimPacketModelC$GainRadioModel$receive(message_t *msg);


uint8_t TossimPacketModelC$error[1000];

static inline void TossimPacketModelC$GainRadioModel$acked(message_t *msg);


static bool TossimPacketModelC$GainRadioModel$shouldAck(message_t *msg);
# 60 "/opt/tinyos-2.1.2/tos/lib/tossim/GainRadioModel.nc"
static void CpmModelC$Model$receive(message_t *msg);
#line 59
static void CpmModelC$Model$acked(message_t *msg);

static bool CpmModelC$Model$shouldAck(message_t *msg);
# 58 "/opt/tinyos-2.1.2/tos/lib/tossim/CpmModelC.nc"
message_t *CpmModelC$outgoing[1000];
bool CpmModelC$requestAck[1000];
bool CpmModelC$receiving[1000];
bool CpmModelC$transmitting[1000];
sim_time_t CpmModelC$transmissionEndTime[1000];
struct CpmModelC$receive_message;
typedef struct CpmModelC$receive_message CpmModelC$receive_message_t;

struct CpmModelC$receive_message {
  int source;
  sim_time_t start;
  sim_time_t end;
  double power;
  double reversePower;
  int8_t strength;
  bool lost;
  bool ack;
  message_t *msg;
  CpmModelC$receive_message_t *next;
};

CpmModelC$receive_message_t *CpmModelC$outstandingReceptionHead[1000];

static inline CpmModelC$receive_message_t *CpmModelC$allocate_receive_message(void );
static inline void CpmModelC$free_receive_message(CpmModelC$receive_message_t *msg);
static inline sim_event_t *CpmModelC$allocate_receive_event(sim_time_t t, CpmModelC$receive_message_t *m);

static bool CpmModelC$shouldReceive(double SNR);
static inline bool CpmModelC$checkReceive(CpmModelC$receive_message_t *msg);
static double CpmModelC$packetNoise(CpmModelC$receive_message_t *msg);


static inline double CpmModelC$timeInMs(void );
#line 126
static double CpmModelC$noise_hash_generation(void );
#line 151
static inline double CpmModelC$arr_estimate_from_snr(double SNR);
#line 166
static inline int CpmModelC$shouldAckReceive(double snr);
#line 178
static inline void CpmModelC$sim_gain_ack_handle(sim_event_t *evt);
#line 200
double CpmModelC$clearThreshold[1000];


static inline bool CpmModelC$Model$clearChannel(void );


static void CpmModelC$sim_gain_schedule_ack(int source, sim_time_t t, CpmModelC$receive_message_t *r);
#line 230
static inline double CpmModelC$prr_estimate_from_snr(double SNR);
#line 248
static bool CpmModelC$shouldReceive(double SNR);
#line 260
static inline bool CpmModelC$checkReceive(CpmModelC$receive_message_t *msg);
#line 274
static double CpmModelC$packetNoise(CpmModelC$receive_message_t *msg);
#line 296
static inline void CpmModelC$sim_gain_receive_handle(sim_event_t *evt);
#line 369
static inline void CpmModelC$enqueue_receive_event(int source, sim_time_t endTime, message_t *msg, bool receive, double power, double reversePower);
#line 428
static inline void CpmModelC$sim_gain_put(int dest, message_t *msg, sim_time_t endTime, bool receive, double power, double reversePower);


static inline void CpmModelC$Model$putOnAirTo(int dest, message_t *msg, bool ack, sim_time_t endTime, double power, double reversePower);
#line 459
static inline void CpmModelC$Model$setPendingTransmission(void );


static inline sim_event_t *CpmModelC$allocate_receive_event(sim_time_t endTime, CpmModelC$receive_message_t *msg);
#line 479
static inline CpmModelC$receive_message_t *CpmModelC$allocate_receive_message(void );


static inline void CpmModelC$free_receive_message(CpmModelC$receive_message_t *msg);
# 65 "/opt/tinyos-2.1.2/tos/lib/tossim/ActiveMessageAddressC.nc"
bool ActiveMessageAddressC$set[1000];
am_addr_t ActiveMessageAddressC$addr[1000];


static am_addr_t ActiveMessageAddressC$ActiveMessageAddress$amAddress(void );
#line 88
static inline am_addr_t ActiveMessageAddressC$amAddress(void );
# 46 "/opt/tinyos-2.1.2/tos/interfaces/GeneralIO.nc"
static void LedsP$Led0$makeOutput(void );
#line 40
static void LedsP$Led0$set(void );


static void LedsP$Led1$makeOutput(void );
#line 40
static void LedsP$Led1$set(void );


static void LedsP$Led2$makeOutput(void );
#line 40
static void LedsP$Led2$set(void );
# 56 "/opt/tinyos-2.1.2/tos/system/LedsP.nc"
static inline error_t LedsP$Init$init(void );
# 64 "/opt/tinyos-2.1.2/tos/lib/timer/Timer.nc"
static void NetworkC$Timer0$startPeriodic(uint32_t dt);
# 104 "/opt/tinyos-2.1.2/tos/interfaces/SplitControl.nc"
static error_t NetworkC$AMControl$start(void );
# 126 "/opt/tinyos-2.1.2/tos/interfaces/Packet.nc"
static 
#line 123
void * 


NetworkC$Packet$getPayload(
#line 121
message_t * msg, 


uint8_t len);
# 80 "/opt/tinyos-2.1.2/tos/interfaces/AMSend.nc"
static error_t NetworkC$AMSend$send(am_addr_t addr, 
#line 71
message_t * msg, 


uint8_t len);
# 19 "NetworkC.nc"
message_t NetworkC$pkt[1000];
bool NetworkC$busy[1000];
int NetworkC$z[1000];
float NetworkC$s6[1000][2];
float NetworkC$s21[1000][2];
float NetworkC$s8[1000][2];
float NetworkC$s2[1000][2];
float NetworkC$s50[1000][4];

float NetworkC$s5[1000][4];
float NetworkC$s4[1000][6];
float NetworkC$s3[1000][2];
float NetworkC$s1[1000][4];

float NetworkC$s7[1000][4];
float NetworkC$s10[1000][4];
float NetworkC$s11[1000][2];
float NetworkC$s12[1000][4];
float NetworkC$s13[1000][2];
float NetworkC$s14[1000][4];
float NetworkC$s15[1000][2];
float NetworkC$s16[1000][4];
float NetworkC$s17[1000][2];
float NetworkC$s18[1000][2];
float NetworkC$s19[1000][4];

float NetworkC$s22[1000][4];
float NetworkC$s23[1000][2];
float NetworkC$s24[1000][4];
float NetworkC$s25[1000][2];
float NetworkC$s26[1000][4];
float NetworkC$s27[1000][2];
float NetworkC$s28[1000][4];
float NetworkC$s29[1000][2];
float NetworkC$s30[1000][4];
float NetworkC$s31[1000][2];

float NetworkC$s33[1000][2];
float NetworkC$s34[1000][4];
float NetworkC$s35[1000][2];
float NetworkC$s36[1000][4];
float NetworkC$s37[1000][2];
float NetworkC$s38[1000][2];
float NetworkC$s39[1000][4];
float NetworkC$s40[1000][2];
float NetworkC$s41[1000][2];

float NetworkC$s9[1000][2];
float NetworkC$s43[1000][4];
float NetworkC$s44[1000][2];
float NetworkC$s45[1000][2];
float NetworkC$s46[1000][2];
float NetworkC$s47[1000][2];
float NetworkC$s48[1000][2];

float NetworkC$m[1000];
#line 74
float NetworkC$n[1000];
#line 74
float NetworkC$x[1000];
#line 74
float NetworkC$y[1000];
#line 74
float NetworkC$h[1000];

uint16_t NetworkC$count[1000];
int NetworkC$r95[1000];
int NetworkC$r85[1000];
int NetworkC$r54[1000];
int NetworkC$r74[1000];
int NetworkC$r84[1000];
int NetworkC$r31[1000];
int NetworkC$r41[1000];
int NetworkC$r150[1000];
int NetworkC$r250[1000];
int NetworkC$r895[1000];
int NetworkC$r5784[1000];
int NetworkC$r341[1000];
int NetworkC$r1250[1000];

int NetworkC$r107[1000];
int NetworkC$r227[1000];
int NetworkC$r10227[1000];

int NetworkC$r1110[1000];
int NetworkC$r2310[1000];
int NetworkC$r112310[1000];

int NetworkC$r1312[1000];
int NetworkC$r2512[1000];
int NetworkC$r132512[1000];

int NetworkC$r1514[1000];
int NetworkC$r2714[1000];
int NetworkC$r152714[1000];

int NetworkC$r1716[1000];
int NetworkC$r2916[1000];
int NetworkC$r172916[1000];

int NetworkC$r2019[1000];
int NetworkC$r3219[1000];
int NetworkC$r203219[1000];

int NetworkC$r2322[1000];
int NetworkC$r3322[1000];
int NetworkC$r233322[1000];

int NetworkC$r2524[1000];
int NetworkC$r3524[1000];
int NetworkC$r253524[1000];

int NetworkC$r2726[1000];
int NetworkC$r3726[1000];
int NetworkC$r273726[1000];

int NetworkC$r2928[1000];
int NetworkC$r3928[1000];
int NetworkC$r293928[1000];

int NetworkC$r3130[1000];
int NetworkC$r4130[1000];
int NetworkC$r314130[1000];


int NetworkC$r3534[1000];
int NetworkC$r4634[1000];
int NetworkC$r354634[1000];

int NetworkC$r3736[1000];
int NetworkC$r4836[1000];
int NetworkC$r374836[1000];

int NetworkC$r4039[1000];
int NetworkC$r4939[1000];
int NetworkC$r404939[1000];


int NetworkC$r3343[1000];
int NetworkC$r4443[1000];
int NetworkC$r334443[1000];

int NetworkC$r96[1000];
int NetworkC$r73[1000];
int NetworkC$r62[1000];
int NetworkC$r439[1000];
int NetworkC$r1211[1000];
int NetworkC$r1413[1000];
int NetworkC$r1615[1000];
int NetworkC$r1817[1000];
int NetworkC$r1918[1000];
int NetworkC$r218[1000];
int NetworkC$r921[1000];
int NetworkC$r2423[1000];
int NetworkC$r2625[1000];
int NetworkC$r2827[1000];
int NetworkC$r3029[1000];
int NetworkC$r3231[1000];
int NetworkC$r3433[1000];
int NetworkC$r3635[1000];
int NetworkC$r3837[1000];
int NetworkC$r3938[1000];
int NetworkC$r4140[1000];
int NetworkC$r4241[1000];
int NetworkC$r4544[1000];
int NetworkC$r4645[1000];
int NetworkC$r4746[1000];
int NetworkC$r4847[1000];
int NetworkC$r4948[1000];

int NetworkC$ws1[1000];
int NetworkC$ws2[1000];


int NetworkC$wa[1000];
int NetworkC$wb[1000];
float NetworkC$wa2[1000];
float NetworkC$wb2[1000];

int NetworkC$flag[1000];
int NetworkC$flag1[1000];
int NetworkC$flag2[1000];
int NetworkC$flag3[1000];
int NetworkC$flag4[1000];
int NetworkC$flag5[1000];
int NetworkC$flag6[1000];


static inline void NetworkC$Boot$booted(void );
#line 213
static inline void NetworkC$AMControl$startDone(error_t err);
#line 225
static void NetworkC$ssbm(NetworkMsg *btrpkt);
#line 725
static inline void NetworkC$AMControl$stopDone(error_t err);


static inline void NetworkC$Timer0$fired(void );
#line 954
static inline void NetworkC$AMSend$sendDone(message_t *msg, error_t err);


static int NetworkC$weishu(int a);


static void NetworkC$pdflag(int *a7, int *a1, int *a2, int *a3, int *a4, int *a5, int *a6, NetworkMsg *btrpkt, NetworkMsg *temppkt);
#line 1085
static inline message_t *NetworkC$Receive$receive(message_t *msg, void *payload, uint8_t len);
# 53 "/opt/tinyos-2.1.2/tos/chips/atm128/timer/HplAtm128TimerCtrl8.nc"
static Atm128_TIFR_t /*AlarmCounterMilliP.Atm128AlarmAsyncC.Atm128AlarmAsyncP*/Atm128AlarmAsyncP$0$TimerCtrl$getInterruptFlag(void );
#line 46
static void /*AlarmCounterMilliP.Atm128AlarmAsyncC.Atm128AlarmAsyncP*/Atm128AlarmAsyncP$0$TimerCtrl$setControl(Atm128TimerControl_t control);
# 78 "/opt/tinyos-2.1.2/tos/lib/timer/Alarm.nc"
static void /*AlarmCounterMilliP.Atm128AlarmAsyncC.Atm128AlarmAsyncP*/Atm128AlarmAsyncP$0$Alarm$fired(void );
# 82 "/opt/tinyos-2.1.2/tos/lib/timer/Counter.nc"
static void /*AlarmCounterMilliP.Atm128AlarmAsyncC.Atm128AlarmAsyncP*/Atm128AlarmAsyncP$0$Counter$overflow(void );
# 44 "/opt/tinyos-2.1.2/tos/chips/atm128/timer/HplAtm128TimerAsync.nc"
static int /*AlarmCounterMilliP.Atm128AlarmAsyncC.Atm128AlarmAsyncP*/Atm128AlarmAsyncP$0$TimerAsync$compareBusy(void );
#line 32
static void /*AlarmCounterMilliP.Atm128AlarmAsyncC.Atm128AlarmAsyncP*/Atm128AlarmAsyncP$0$TimerAsync$setTimer0Asynchronous(void );
# 48 "/opt/tinyos-2.1.2/tos/chips/atm128/timer/HplAtm128Compare.nc"
static /*AlarmCounterMilliP.Atm128AlarmAsyncC.Atm128AlarmAsyncP*/Atm128AlarmAsyncP$0$Compare$size_type /*AlarmCounterMilliP.Atm128AlarmAsyncC.Atm128AlarmAsyncP*/Atm128AlarmAsyncP$0$Compare$get(void );


static void /*AlarmCounterMilliP.Atm128AlarmAsyncC.Atm128AlarmAsyncP*/Atm128AlarmAsyncP$0$Compare$set(/*AlarmCounterMilliP.Atm128AlarmAsyncC.Atm128AlarmAsyncP*/Atm128AlarmAsyncP$0$Compare$size_type t);


static void /*AlarmCounterMilliP.Atm128AlarmAsyncC.Atm128AlarmAsyncP*/Atm128AlarmAsyncP$0$Compare$start(void );
# 61 "/opt/tinyos-2.1.2/tos/chips/atm128/timer/HplAtm128Timer.nc"
static /*AlarmCounterMilliP.Atm128AlarmAsyncC.Atm128AlarmAsyncP*/Atm128AlarmAsyncP$0$Timer$timer_size /*AlarmCounterMilliP.Atm128AlarmAsyncC.Atm128AlarmAsyncP*/Atm128AlarmAsyncP$0$Timer$get(void );
# 38 "/opt/tinyos-2.1.2/tos/chips/atm128/timer/Atm128AlarmAsyncP.nc"
uint8_t /*AlarmCounterMilliP.Atm128AlarmAsyncC.Atm128AlarmAsyncP*/Atm128AlarmAsyncP$0$set[1000];
uint32_t /*AlarmCounterMilliP.Atm128AlarmAsyncC.Atm128AlarmAsyncP*/Atm128AlarmAsyncP$0$t0[1000];
#line 39
uint32_t /*AlarmCounterMilliP.Atm128AlarmAsyncC.Atm128AlarmAsyncP*/Atm128AlarmAsyncP$0$dt[1000];
uint32_t /*AlarmCounterMilliP.Atm128AlarmAsyncC.Atm128AlarmAsyncP*/Atm128AlarmAsyncP$0$base[1000];


enum /*AlarmCounterMilliP.Atm128AlarmAsyncC.Atm128AlarmAsyncP*/Atm128AlarmAsyncP$0$__nesc_unnamed4333 {
  Atm128AlarmAsyncP$0$MINDT = 2, 
  Atm128AlarmAsyncP$0$MAXT = 230
};


static void /*AlarmCounterMilliP.Atm128AlarmAsyncC.Atm128AlarmAsyncP*/Atm128AlarmAsyncP$0$setInterrupt(void );


static inline error_t /*AlarmCounterMilliP.Atm128AlarmAsyncC.Atm128AlarmAsyncP*/Atm128AlarmAsyncP$0$Init$init(void );
#line 74
static inline void /*AlarmCounterMilliP.Atm128AlarmAsyncC.Atm128AlarmAsyncP*/Atm128AlarmAsyncP$0$setOcr0(uint8_t n);
#line 90
static void /*AlarmCounterMilliP.Atm128AlarmAsyncC.Atm128AlarmAsyncP*/Atm128AlarmAsyncP$0$setInterrupt(void );
#line 149
static inline void /*AlarmCounterMilliP.Atm128AlarmAsyncC.Atm128AlarmAsyncP*/Atm128AlarmAsyncP$0$Compare$fired(void );
#line 161
static uint32_t /*AlarmCounterMilliP.Atm128AlarmAsyncC.Atm128AlarmAsyncP*/Atm128AlarmAsyncP$0$Counter$get(void );
#line 204
static inline void /*AlarmCounterMilliP.Atm128AlarmAsyncC.Atm128AlarmAsyncP*/Atm128AlarmAsyncP$0$Alarm$stop(void );


static void /*AlarmCounterMilliP.Atm128AlarmAsyncC.Atm128AlarmAsyncP*/Atm128AlarmAsyncP$0$Alarm$startAt(uint32_t nt0, uint32_t ndt);


static inline uint32_t /*AlarmCounterMilliP.Atm128AlarmAsyncC.Atm128AlarmAsyncP*/Atm128AlarmAsyncP$0$Alarm$getNow(void );


static inline uint32_t /*AlarmCounterMilliP.Atm128AlarmAsyncC.Atm128AlarmAsyncP*/Atm128AlarmAsyncP$0$Alarm$getAlarm(void );


static inline void /*AlarmCounterMilliP.Atm128AlarmAsyncC.Atm128AlarmAsyncP*/Atm128AlarmAsyncP$0$Timer$overflow(void );
# 70 "/opt/tinyos-2.1.2/tos/chips/atm128/timer/HplAtm128Timer.nc"
static void HplAtm128Timer0AsyncP$Timer0$overflow(void );
# 58 "/opt/tinyos-2.1.2/tos/chips/atm128/timer/HplAtm128Compare.nc"
static void HplAtm128Timer0AsyncP$Compare$fired(void );
# 57 "/opt/tinyos-2.1.2/tos/chips/atm128/timer/sim/HplAtm128Timer0AsyncP.nc"
bool HplAtm128Timer0AsyncP$inOverflow[1000];


static inline void HplAtm128Timer0AsyncP$cancel_overflow(void );
static inline sim_event_t *HplAtm128Timer0AsyncP$allocate_overflow(void );
static void HplAtm128Timer0AsyncP$configure_overflow(sim_event_t *e);
static inline void HplAtm128Timer0AsyncP$schedule_new_overflow(void );

static inline sim_time_t HplAtm128Timer0AsyncP$clock_to_sim(sim_time_t t);
static inline sim_time_t HplAtm128Timer0AsyncP$sim_to_clock(sim_time_t t);
static uint16_t HplAtm128Timer0AsyncP$shiftFromScale(void );


sim_time_t HplAtm128Timer0AsyncP$lastZero[1000];


uint8_t HplAtm128Timer0AsyncP$oldScale[1000];


static inline void HplAtm128Timer0AsyncP$cancel_compare(void );
static inline sim_event_t *HplAtm128Timer0AsyncP$allocate_compare(void );
static void HplAtm128Timer0AsyncP$configure_compare(sim_event_t *e);
static void HplAtm128Timer0AsyncP$schedule_new_compare(void );

static inline sim_time_t HplAtm128Timer0AsyncP$clock_to_sim(sim_time_t t);
static inline sim_time_t HplAtm128Timer0AsyncP$sim_to_clock(sim_time_t t);
static uint16_t HplAtm128Timer0AsyncP$shiftFromScale(void );


void INTERRUPT_15(void )   ;


void INTERRUPT_16(void )   ;


static sim_time_t HplAtm128Timer0AsyncP$last_zero(void );


static inline void HplAtm128Timer0AsyncP$notify_changed(void );


static inline sim_time_t HplAtm128Timer0AsyncP$notify_clockTicksPerSec(void );
#line 148
static inline sim_time_t HplAtm128Timer0AsyncP$clock_to_sim(sim_time_t t);


static inline sim_time_t HplAtm128Timer0AsyncP$sim_to_clock(sim_time_t t);


static uint16_t HplAtm128Timer0AsyncP$shiftFromScale(void );
#line 185
sim_event_t *HplAtm128Timer0AsyncP$compare[1000];

static inline void HplAtm128Timer0AsyncP$timer0_compare_handle(sim_event_t *evt);
#line 223
static inline sim_event_t *HplAtm128Timer0AsyncP$allocate_compare(void );


static void HplAtm128Timer0AsyncP$configure_compare(sim_event_t *evt);
#line 267
static void HplAtm128Timer0AsyncP$schedule_new_compare(void );
#line 282
static uint8_t HplAtm128Timer0AsyncP$Timer0$get(void );
#line 297
static inline void HplAtm128Timer0AsyncP$Timer0$set(uint8_t newVal);
#line 321
static uint8_t HplAtm128Timer0AsyncP$Timer0$getScale(void );
#line 364
static inline void HplAtm128Timer0AsyncP$Timer0Ctrl$setControl(Atm128TimerControl_t x);
#line 383
static Atm128_TIFR_t HplAtm128Timer0AsyncP$Timer0Ctrl$getInterruptFlag(void );
#line 447
static inline void HplAtm128Timer0AsyncP$Compare$start(void );


static uint8_t HplAtm128Timer0AsyncP$Compare$get(void );


static void HplAtm128Timer0AsyncP$Compare$set(uint8_t t);
#line 480
sim_event_t *HplAtm128Timer0AsyncP$overflow[1000];
static inline void HplAtm128Timer0AsyncP$timer0_overflow_handle(sim_event_t *evt);
#line 500
static inline sim_event_t *HplAtm128Timer0AsyncP$allocate_overflow(void );


static void HplAtm128Timer0AsyncP$configure_overflow(sim_event_t *evt);
#line 534
static inline void HplAtm128Timer0AsyncP$schedule_new_overflow(void );


static inline void HplAtm128Timer0AsyncP$cancel_overflow(void );
#line 561
static inline void HplAtm128Timer0AsyncP$TimerAsync$setTimer0Asynchronous(void );


static inline int HplAtm128Timer0AsyncP$TimerAsync$compareBusy(void );


static inline void HplAtm128Timer0AsyncP$cancel_compare(void );
# 67 "/opt/tinyos-2.1.2/tos/interfaces/TaskBasic.nc"
static error_t /*HilTimerMilliC.AlarmToTimerC*/AlarmToTimerC$0$fired$postTask(void );
# 109 "/opt/tinyos-2.1.2/tos/lib/timer/Alarm.nc"
static /*HilTimerMilliC.AlarmToTimerC*/AlarmToTimerC$0$Alarm$size_type /*HilTimerMilliC.AlarmToTimerC*/AlarmToTimerC$0$Alarm$getNow(void );
#line 103
static void /*HilTimerMilliC.AlarmToTimerC*/AlarmToTimerC$0$Alarm$startAt(/*HilTimerMilliC.AlarmToTimerC*/AlarmToTimerC$0$Alarm$size_type t0, /*HilTimerMilliC.AlarmToTimerC*/AlarmToTimerC$0$Alarm$size_type dt);
#line 116
static /*HilTimerMilliC.AlarmToTimerC*/AlarmToTimerC$0$Alarm$size_type /*HilTimerMilliC.AlarmToTimerC*/AlarmToTimerC$0$Alarm$getAlarm(void );
#line 73
static void /*HilTimerMilliC.AlarmToTimerC*/AlarmToTimerC$0$Alarm$stop(void );
# 83 "/opt/tinyos-2.1.2/tos/lib/timer/Timer.nc"
static void /*HilTimerMilliC.AlarmToTimerC*/AlarmToTimerC$0$Timer$fired(void );
# 74 "/opt/tinyos-2.1.2/tos/lib/timer/AlarmToTimerC.nc"
enum /*HilTimerMilliC.AlarmToTimerC*/AlarmToTimerC$0$__nesc_unnamed4334 {
#line 74
  AlarmToTimerC$0$fired = 3U
};
#line 74
typedef int /*HilTimerMilliC.AlarmToTimerC*/AlarmToTimerC$0$__nesc_sillytask_fired[/*HilTimerMilliC.AlarmToTimerC*/AlarmToTimerC$0$fired];
#line 55
uint32_t /*HilTimerMilliC.AlarmToTimerC*/AlarmToTimerC$0$m_dt[1000];
bool /*HilTimerMilliC.AlarmToTimerC*/AlarmToTimerC$0$m_oneshot[1000];

static inline void /*HilTimerMilliC.AlarmToTimerC*/AlarmToTimerC$0$start(uint32_t t0, uint32_t dt, bool oneshot);
#line 71
static inline void /*HilTimerMilliC.AlarmToTimerC*/AlarmToTimerC$0$Timer$stop(void );


static inline void /*HilTimerMilliC.AlarmToTimerC*/AlarmToTimerC$0$fired$runTask(void );


static inline void /*HilTimerMilliC.AlarmToTimerC*/AlarmToTimerC$0$Alarm$fired(void );
#line 93
static inline void /*HilTimerMilliC.AlarmToTimerC*/AlarmToTimerC$0$Timer$startOneShotAt(uint32_t t0, uint32_t dt);


static inline uint32_t /*HilTimerMilliC.AlarmToTimerC*/AlarmToTimerC$0$Timer$getNow(void );
# 67 "/opt/tinyos-2.1.2/tos/interfaces/TaskBasic.nc"
static error_t /*HilTimerMilliC.VirtualizeTimerC*/VirtualizeTimerC$0$updateFromTimer$postTask(void );
# 136 "/opt/tinyos-2.1.2/tos/lib/timer/Timer.nc"
static uint32_t /*HilTimerMilliC.VirtualizeTimerC*/VirtualizeTimerC$0$TimerFrom$getNow(void );
#line 129
static void /*HilTimerMilliC.VirtualizeTimerC*/VirtualizeTimerC$0$TimerFrom$startOneShotAt(uint32_t t0, uint32_t dt);
#line 78
static void /*HilTimerMilliC.VirtualizeTimerC*/VirtualizeTimerC$0$TimerFrom$stop(void );


static void /*HilTimerMilliC.VirtualizeTimerC*/VirtualizeTimerC$0$Timer$fired(
# 48 "/opt/tinyos-2.1.2/tos/lib/timer/VirtualizeTimerC.nc"
uint8_t arg_0x418bac70);
#line 71
enum /*HilTimerMilliC.VirtualizeTimerC*/VirtualizeTimerC$0$__nesc_unnamed4335 {
#line 71
  VirtualizeTimerC$0$updateFromTimer = 4U
};
#line 71
typedef int /*HilTimerMilliC.VirtualizeTimerC*/VirtualizeTimerC$0$__nesc_sillytask_updateFromTimer[/*HilTimerMilliC.VirtualizeTimerC*/VirtualizeTimerC$0$updateFromTimer];
#line 53
enum /*HilTimerMilliC.VirtualizeTimerC*/VirtualizeTimerC$0$__nesc_unnamed4336 {

  VirtualizeTimerC$0$NUM_TIMERS = 1U, 
  VirtualizeTimerC$0$END_OF_LIST = 255
};


#line 59
typedef struct /*HilTimerMilliC.VirtualizeTimerC*/VirtualizeTimerC$0$__nesc_unnamed4337 {

  uint32_t t0;
  uint32_t dt;
  bool isoneshot : 1;
  bool isrunning : 1;
  bool _reserved : 6;
} /*HilTimerMilliC.VirtualizeTimerC*/VirtualizeTimerC$0$Timer_t;

/*HilTimerMilliC.VirtualizeTimerC*/VirtualizeTimerC$0$Timer_t /*HilTimerMilliC.VirtualizeTimerC*/VirtualizeTimerC$0$m_timers[1000][/*HilTimerMilliC.VirtualizeTimerC*/VirtualizeTimerC$0$NUM_TIMERS];


static void /*HilTimerMilliC.VirtualizeTimerC*/VirtualizeTimerC$0$fireTimers(uint32_t now);
#line 100
static inline void /*HilTimerMilliC.VirtualizeTimerC*/VirtualizeTimerC$0$updateFromTimer$runTask(void );
#line 139
static inline void /*HilTimerMilliC.VirtualizeTimerC*/VirtualizeTimerC$0$TimerFrom$fired(void );


static inline void /*HilTimerMilliC.VirtualizeTimerC*/VirtualizeTimerC$0$startTimer(uint8_t num, uint32_t t0, uint32_t dt, bool isoneshot);


static inline void /*HilTimerMilliC.VirtualizeTimerC*/VirtualizeTimerC$0$Timer$startPeriodic(uint8_t num, uint32_t dt);
#line 204
static inline void /*HilTimerMilliC.VirtualizeTimerC*/VirtualizeTimerC$0$Timer$default$fired(uint8_t num);
# 58 "/opt/tinyos-2.1.2/tos/lib/timer/CounterToLocalTimeC.nc"
static inline void /*HilTimerMilliC.CounterToLocalTimeC*/CounterToLocalTimeC$0$Counter$overflow(void );
# 110 "/opt/tinyos-2.1.2/tos/interfaces/AMSend.nc"
static void /*NetworkAppC.AMSenderC.SenderC.AMQueueEntryP*/AMQueueEntryP$0$AMSend$sendDone(
#line 103
message_t * msg, 


error_t error);
# 75 "/opt/tinyos-2.1.2/tos/interfaces/Send.nc"
static error_t /*NetworkAppC.AMSenderC.SenderC.AMQueueEntryP*/AMQueueEntryP$0$Send$send(
#line 67
message_t * msg, 


uint8_t len);
# 103 "/opt/tinyos-2.1.2/tos/interfaces/AMPacket.nc"
static void /*NetworkAppC.AMSenderC.SenderC.AMQueueEntryP*/AMQueueEntryP$0$AMPacket$setDestination(
#line 99
message_t * amsg, 


am_addr_t addr);
#line 162
static void /*NetworkAppC.AMSenderC.SenderC.AMQueueEntryP*/AMQueueEntryP$0$AMPacket$setType(
#line 158
message_t * amsg, 


am_id_t t);
# 53 "/opt/tinyos-2.1.2/tos/system/AMQueueEntryP.nc"
static error_t /*NetworkAppC.AMSenderC.SenderC.AMQueueEntryP*/AMQueueEntryP$0$AMSend$send(am_addr_t dest, 
message_t *msg, 
uint8_t len);


static inline void /*NetworkAppC.AMSenderC.SenderC.AMQueueEntryP*/AMQueueEntryP$0$Send$sendDone(message_t *m, error_t err);
# 80 "/opt/tinyos-2.1.2/tos/interfaces/AMSend.nc"
static error_t /*AMQueueP.AMQueueImplP*/AMQueueImplP$0$AMSend$send(
# 48 "/opt/tinyos-2.1.2/tos/system/AMQueueImplP.nc"
am_id_t arg_0x4191b9f8, 
# 80 "/opt/tinyos-2.1.2/tos/interfaces/AMSend.nc"
am_addr_t addr, 
#line 71
message_t * msg, 


uint8_t len);
# 100 "/opt/tinyos-2.1.2/tos/interfaces/Send.nc"
static void /*AMQueueP.AMQueueImplP*/AMQueueImplP$0$Send$sendDone(
# 46 "/opt/tinyos-2.1.2/tos/system/AMQueueImplP.nc"
uint8_t arg_0x4191b010, 
# 96 "/opt/tinyos-2.1.2/tos/interfaces/Send.nc"
message_t * msg, 


error_t error);
# 78 "/opt/tinyos-2.1.2/tos/interfaces/Packet.nc"
static uint8_t /*AMQueueP.AMQueueImplP*/AMQueueImplP$0$Packet$payloadLength(
#line 74
message_t * msg);
#line 94
static void /*AMQueueP.AMQueueImplP*/AMQueueImplP$0$Packet$setPayloadLength(
#line 90
message_t * msg, 


uint8_t len);
# 67 "/opt/tinyos-2.1.2/tos/interfaces/TaskBasic.nc"
static error_t /*AMQueueP.AMQueueImplP*/AMQueueImplP$0$errorTask$postTask(void );
# 78 "/opt/tinyos-2.1.2/tos/interfaces/AMPacket.nc"
static am_addr_t /*AMQueueP.AMQueueImplP*/AMQueueImplP$0$AMPacket$destination(
#line 74
message_t * amsg);
#line 147
static am_id_t /*AMQueueP.AMQueueImplP*/AMQueueImplP$0$AMPacket$type(
#line 143
message_t * amsg);
# 126 "/opt/tinyos-2.1.2/tos/system/AMQueueImplP.nc"
enum /*AMQueueP.AMQueueImplP*/AMQueueImplP$0$__nesc_unnamed4338 {
#line 126
  AMQueueImplP$0$CancelTask = 5U
};
#line 126
typedef int /*AMQueueP.AMQueueImplP*/AMQueueImplP$0$__nesc_sillytask_CancelTask[/*AMQueueP.AMQueueImplP*/AMQueueImplP$0$CancelTask];
#line 169
enum /*AMQueueP.AMQueueImplP*/AMQueueImplP$0$__nesc_unnamed4339 {
#line 169
  AMQueueImplP$0$errorTask = 6U
};
#line 169
typedef int /*AMQueueP.AMQueueImplP*/AMQueueImplP$0$__nesc_sillytask_errorTask[/*AMQueueP.AMQueueImplP*/AMQueueImplP$0$errorTask];
#line 57
#line 55
typedef struct /*AMQueueP.AMQueueImplP*/AMQueueImplP$0$__nesc_unnamed4340 {
  message_t * msg;
} /*AMQueueP.AMQueueImplP*/AMQueueImplP$0$queue_entry_t;

uint8_t /*AMQueueP.AMQueueImplP*/AMQueueImplP$0$current[1000];
/*AMQueueP.AMQueueImplP*/AMQueueImplP$0$queue_entry_t /*AMQueueP.AMQueueImplP*/AMQueueImplP$0$queue[1000][1];
uint8_t /*AMQueueP.AMQueueImplP*/AMQueueImplP$0$cancelMask[1000][1 / 8 + 1];

static void /*AMQueueP.AMQueueImplP*/AMQueueImplP$0$tryToSend(void );

static inline void /*AMQueueP.AMQueueImplP*/AMQueueImplP$0$nextPacket(void );
#line 90
static inline error_t /*AMQueueP.AMQueueImplP*/AMQueueImplP$0$Send$send(uint8_t clientId, message_t *msg, 
uint8_t len);
#line 126
static inline void /*AMQueueP.AMQueueImplP*/AMQueueImplP$0$CancelTask$runTask(void );
#line 163
static inline void /*AMQueueP.AMQueueImplP*/AMQueueImplP$0$sendDone(uint8_t last, message_t * msg, error_t err);


static inline void /*AMQueueP.AMQueueImplP*/AMQueueImplP$0$errorTask$runTask(void );


static void /*AMQueueP.AMQueueImplP*/AMQueueImplP$0$tryToSend(void );
#line 189
static void /*AMQueueP.AMQueueImplP*/AMQueueImplP$0$AMSend$sendDone(am_id_t id, message_t *msg, error_t err);
#line 215
static inline void /*AMQueueP.AMQueueImplP*/AMQueueImplP$0$Send$default$sendDone(uint8_t id, message_t *msg, error_t err);
# 78 "/opt/tinyos-2.1.2/tos/lib/tossim/heap.c"
static inline void init_heap(heap_t *heap)
#line 78
{
  heap->size = 0;
  heap->private_size = STARTING_SIZE;
  heap->data = malloc(sizeof(node_t ) * heap->private_size);
}

#line 130
static inline void expand_heap(heap_t *heap)
#line 130
{
  int new_size = heap->private_size * 2 + 1;
  void *new_data = malloc(sizeof(node_t ) * new_size);


  memcpy(new_data, heap->data, sizeof(node_t ) * heap->private_size);
  free(heap->data);

  heap->data = new_data;
  heap->private_size = new_size;
}


static inline void heap_insert(heap_t *heap, void *data, long long int key)
#line 144
{
  int findex = heap->size;

#line 146
  if (findex == heap->private_size) {
      expand_heap(heap);
    }

  findex = heap->size;
  ((node_t *)heap->data)[findex].key = key;
  ((node_t *)heap->data)[findex].data = data;
  up_heap(heap, findex);

  heap->size++;
}

#line 88
static inline int is_empty(heap_t *heap)
#line 88
{
  return heap->size == 0;
}

static inline int heap_is_empty(heap_t *heap)
#line 92
{
  return is_empty(heap);
}

static inline long long int heap_get_min_key(heap_t *heap)
#line 96
{
  if (is_empty(heap)) {
      return -1;
    }
  else {
      return ((node_t *)heap->data)[0].key;
    }
}

# 317 "/opt/tinyos-2.1.2/tos/lib/tossim/sim_log.c"
inline static int sim_log_eq(void *key1, void *key2)
#line 317
{
  return strcmp((char *)key1, (char *)key2) == 0;
}

#line 306
inline static unsigned int sim_log_hash(void *key)
#line 306
{
  char *str = (char *)key;
  unsigned int hashVal = 0;
  int hashChar;

  while ((hashChar = * str++)) 
    hashVal = hashChar + (hashVal << 6) + (hashVal << 16) - hashVal;

  return hashVal;
}

#line 159
static inline void sim_log_init()
#line 159
{
  int i;

  channelTable = create_hashtable(128, sim_log_hash, sim_log_eq);

  for (i = 0; i < SIM_LOG_OUTPUT_COUNT; i++) {
      outputs[i].num = 1;
      outputs[i].files = (FILE **)malloc(sizeof(FILE *));
      outputs[i].files[0] = fdopen(1, "w");
    }
}

# 130 "/opt/tinyos-2.1.2/tos/lib/tossim/sim_noise.c"
inline static unsigned int sim_noise_hash(void *key)
#line 130
{
  char *pt = (char *)key;
  unsigned int hashVal = 0;
  int i;

#line 134
  for (i = 0; i < NOISE_HISTORY; i++) {
      hashVal = pt[i] + (hashVal << 6) + (hashVal << 16) - hashVal;
    }
  return hashVal;
}

inline static int sim_noise_eq(void *key1, void *key2)
#line 140
{
  return memcmp((void *)key1, (void *)key2, NOISE_HISTORY) == 0;
}

# 64 "/opt/tinyos-2.1.2/tos/lib/tossim/SimMoteP.nc"
static inline bool SimMoteP$SimMote$isOn(void )
#line 64
{
  return SimMoteP$isOn[sim_node()];
}

# 172 "/opt/tinyos-2.1.2/tos/lib/tossim/sim_log.c"
static inline void sim_log_add_channel(char *name, FILE *file)
#line 172
{
  sim_log_channel_t *channel;

#line 174
  channel = (sim_log_channel_t *)hashtable_search(channelTable, name);


  if (channel == (void *)0) {
      char *newName = (char *)malloc(strlen(name) + 1);

#line 180
      strcpy(newName, name);
      newName[strlen(name)] = 0;

      channel = (sim_log_channel_t *)malloc(sizeof(sim_log_channel_t ));
      channel->name = newName;
      channel->numOutputs = 0;
      channel->size = DEFAULT_CHANNEL_SIZE;
      channel->outputs = (FILE **)malloc(sizeof(FILE *) * channel->size);
      memset(channel->outputs, 0, sizeof(FILE *) * channel->size);
      hashtable_insert(channelTable, newName, channel);
    }


  if (channel->numOutputs == channel->size) {
      FILE **newOutputs;
      int newSize = channel->size * 2;

      newOutputs = (FILE **)malloc(sizeof(FILE *) * newSize);
      memcpy(newOutputs, channel->outputs, channel->size * sizeof(FILE **));

      free(channel->outputs);

      channel->outputs = newOutputs;
      channel->size = newSize;
    }

  channel->outputs[channel->numOutputs] = file;
  channel->numOutputs++;
  sim_log_commit_change();
}

static inline bool sim_log_remove_channel(char *output, FILE *file)
#line 212
{
  sim_log_channel_t *channel;
  int i;

#line 215
  channel = (sim_log_channel_t *)hashtable_search(channelTable, output);

  if (channel == (void *)0) {
      return FALSE;
    }


  for (i = 0; i < channel->numOutputs; i++) {
      FILE *f = channel->outputs[i];

#line 224
      if (file == f) {
          memcpy(&channel->outputs[i], &channel->outputs[i + 1], channel->numOutputs - (i + 1));
          channel->outputs[channel->numOutputs - 1] = (void *)0;
          channel->numOutputs--;
        }
    }

  return TRUE;
}

# 161 "/opt/tinyos-2.1.2/tos/lib/tossim/sim_gain.c"
static inline gain_entry_t *sim_gain_allocate_link(int mote)
#line 161
{
  gain_entry_t *newLink = (gain_entry_t *)malloc(sizeof(gain_entry_t ));

#line 163
  newLink->next = (void *)0;
  newLink->mote = mote;
  newLink->gain = -10000000.0;
  return newLink;
}

# 55 "/opt/tinyos-2.1.2/tos/lib/tossim/randomlib.c"
static inline void RandomInitialise(int ij, int kl)
{
  double s;
#line 57
  double t;
  int ii;
#line 58
  int i;
#line 58
  int j;
#line 58
  int k;
#line 58
  int l;
#line 58
  int jj;
#line 58
  int m;


  if (((ij < 0 || ij > 31328) || kl < 0) || kl > 30081) {
      ij = 1802;
      kl = 9373;
    }

  i = ij / 177 % 177 + 2;
  j = ij % 177 + 2;
  k = kl / 169 % 178 + 1;
  l = kl % 169;

  for (ii = 0; ii < 97; ii++) {
      s = 0.0;
      t = 0.5;
      for (jj = 0; jj < 24; jj++) {
          m = i * j % 179 * k % 179;
          i = j;
          j = k;
          k = m;
          l = (53 * l + 1) % 169;
          if (l * m % 64 >= 32) {
            s += t;
            }
#line 86
          t *= 0.5;
        }
      randU[ii] = s;
    }

  randC = 362436.0 / 16777216.0;
  randCD = 7654321.0 / 16777216.0;
  randCM = 16777213.0 / 16777216.0;
  i97 = 97;
  j97 = 33;
  test = TRUE;
}

# 284 "/opt/tinyos-2.1.2/tos/lib/tossim/sim_noise.c"
static inline void sim_noise_alarm()
#line 284
{
  dummy = 5;
}

# 50 "/opt/tinyos-2.1.2/tos/lib/tossim/sim_packet.c"
inline static tossim_header_t *getHeader(message_t *msg)
#line 50
{
  return (tossim_header_t *)(msg->data - sizeof(tossim_header_t ));
}

# 236 "/opt/tinyos-2.1.2/tos/lib/tossim/TossimActiveMessageC.nc"
static inline void TossimActiveMessageC$active_message_deliver_handle(sim_event_t *evt)
#line 236
{
  message_t *m = (message_t *)evt->data;

#line 238
  sim_log_debug(108U, "Packet", "Delivering packet to %i at %s\n", (int )sim_node(), sim_time_string());
  TossimActiveMessageC$Model$receive(m);
}

static inline sim_event_t *TossimActiveMessageC$allocate_deliver_event(int node, message_t *msg, sim_time_t t)
#line 242
{
  sim_event_t *evt = (sim_event_t *)malloc(sizeof(sim_event_t ));

#line 244
  evt->mote = node;
  evt->time = t;
  evt->handle = TossimActiveMessageC$active_message_deliver_handle;
  evt->cleanup = sim_queue_cleanup_event;
  evt->cancelled = 0;
  evt->force = 0;
  evt->data = msg;
  return evt;
}

#line 185
static inline uint8_t TossimActiveMessageC$Packet$maxPayloadLength(void )
#line 185
{
  return 28;
}

# 88 "/opt/tinyos-2.1.2/tos/lib/tossim/ActiveMessageAddressC.nc"
static inline am_addr_t ActiveMessageAddressC$amAddress(void )
#line 88
{
  return ActiveMessageAddressC$ActiveMessageAddress$amAddress();
}

# 57 "/opt/tinyos-2.1.2/tos/lib/tossim/TossimActiveMessageC.nc"
inline static am_addr_t TossimActiveMessageC$amAddress(void ){
#line 57
  unsigned short __nesc_result;
#line 57

#line 57
  __nesc_result = ActiveMessageAddressC$amAddress();
#line 57

#line 57
  return __nesc_result;
#line 57
}
#line 57
#line 136
static inline am_addr_t TossimActiveMessageC$AMPacket$address(void )
#line 136
{
  return TossimActiveMessageC$amAddress();
}

#line 160
static inline bool TossimActiveMessageC$AMPacket$isForMe(message_t *amsg)
#line 160
{
  return TossimActiveMessageC$AMPacket$destination(amsg) == TossimActiveMessageC$AMPacket$address() || 
  TossimActiveMessageC$AMPacket$destination(amsg) == AM_BROADCAST_ADDR;
}

# 310 "/usr/lib/ncc/nesc_nx.h"
static __inline  uint16_t __nesc_ntoh_uint16(const void * source)
#line 310
{
  const uint8_t *base = source;

#line 312
  return ((uint16_t )base[0] << 8) | base[1];
}

static __inline  uint16_t __nesc_hton_uint16(void * target, uint16_t value)
#line 315
{
  uint8_t *base = target;

#line 317
  base[1] = value;
  base[0] = value >> 8;
  return value;
}

# 80 "/opt/tinyos-2.1.2/tos/interfaces/AMSend.nc"
inline static error_t NetworkC$AMSend$send(am_addr_t addr, message_t * msg, uint8_t len){
#line 80
  unsigned char __nesc_result;
#line 80

#line 80
  __nesc_result = /*NetworkAppC.AMSenderC.SenderC.AMQueueEntryP*/AMQueueEntryP$0$AMSend$send(addr, msg, len);
#line 80

#line 80
  return __nesc_result;
#line 80
}
#line 80
# 189 "/opt/tinyos-2.1.2/tos/lib/tossim/TossimActiveMessageC.nc"
static inline void *TossimActiveMessageC$Packet$getPayload(message_t *msg, uint8_t len)
#line 189
{
  if (len <= 28) {
      return msg->data;
    }
  else {
      return (void *)0;
    }
}

# 126 "/opt/tinyos-2.1.2/tos/interfaces/Packet.nc"
inline static void * NetworkC$Packet$getPayload(message_t * msg, uint8_t len){
#line 126
  void *__nesc_result;
#line 126

#line 126
  __nesc_result = TossimActiveMessageC$Packet$getPayload(msg, len);
#line 126

#line 126
  return __nesc_result;
#line 126
}
#line 126
# 1085 "NetworkC.nc"
static inline message_t *NetworkC$Receive$receive(message_t *msg, void *payload, uint8_t len)
#line 1085
{
  if (len == sizeof(NetworkMsg )) {
      NetworkMsg *btrpkt = (NetworkMsg *)payload;

      sim_log_debug(161U, "Forward", "packet received from %hhu.\n", __nesc_ntoh_uint16(btrpkt->nodeid.nxdata));


      if (TOS_NODE_ID == 5) {
          sim_log_debug(162U, "Forward", "r895= %d.\n", NetworkC$r895[sim_node()]);
          sim_log_debug(163U, "Forward", "r85= %d.\n", NetworkC$r85[sim_node()]);
          sim_log_debug(164U, "Forward", "r95= %d.\n", NetworkC$r95[sim_node()]);
          sim_log_debug(165U, "Forward", "s5[0]= %f.\n", NetworkC$s5[sim_node()][0]);
          sim_log_debug(166U, "Forward", "s5[1]= %f.\n", NetworkC$s5[sim_node()][1]);
          sim_log_debug(167U, "Forward", "s5[2]= %f.\n", NetworkC$s5[sim_node()][2]);
          sim_log_debug(168U, "Forward", "s5[3]= %f.\n", NetworkC$s5[sim_node()][3]);


          if (__nesc_ntoh_uint16(btrpkt->nodeid.nxdata) == 9) {

              NetworkMsg *temppkt = (NetworkMsg *)NetworkC$Packet$getPayload(&NetworkC$pkt[sim_node()], sizeof(NetworkMsg ));

              NetworkC$ssbm(btrpkt);


              NetworkC$wa[sim_node()] = NetworkC$m[sim_node()] * 10000;
              NetworkC$wb[sim_node()] = NetworkC$n[sim_node()] * 10000;

              NetworkC$ws1[sim_node()] = NetworkC$weishu(NetworkC$wa[sim_node()]);
              NetworkC$ws2[sim_node()] = NetworkC$weishu(NetworkC$wb[sim_node()]);
              sim_log_debug(169U, "Forward", "ws1= %d.\n", NetworkC$ws1[sim_node()]);
              sim_log_debug(170U, "Forward", "ws2= %d.\n", NetworkC$ws2[sim_node()]);
              while (NetworkC$ws1[sim_node()] == NetworkC$ws2[sim_node()] && NetworkC$wa[sim_node()] / 1000 == NetworkC$wb[sim_node()] / 1000) {
                  printf("@@@@@@@@@@@@@@@@@@@");

                  if ((__nesc_ntoh_uint16(btrpkt->n6.nxdata) == 100 && __nesc_ntoh_uint16(btrpkt->n5.nxdata) != 100 && __nesc_ntoh_uint16(btrpkt->n4.nxdata) != 100 && __nesc_ntoh_uint16(btrpkt->n3.nxdata) != 100 && __nesc_ntoh_uint16(btrpkt->n2.nxdata) != 100 && __nesc_ntoh_uint16(btrpkt->n1.nxdata) != 100) || (__nesc_ntoh_uint16(btrpkt->n6.nxdata) == 100 && NetworkC$flag5[sim_node()] != 0)) {
                      __nesc_hton_uint16(temppkt->n6.nxdata, NetworkC$wa[sim_node()] / 1000);
                      NetworkC$flag6[sim_node()] = 1;
                      sim_log_debug(171U, "Forward", "btrpkt->n1= %d.\n", __nesc_ntoh_uint16(btrpkt->n1.nxdata));
                      sim_log_debug(172U, "Forward", "btrpkt->n2= %d.\n", __nesc_ntoh_uint16(btrpkt->n2.nxdata));
                      sim_log_debug(173U, "Forward", "btrpkt->n3= %d.\n", __nesc_ntoh_uint16(btrpkt->n3.nxdata));
                      sim_log_debug(174U, "Forward", "btrpkt->n4= %d.\n", __nesc_ntoh_uint16(btrpkt->n4.nxdata));
                      sim_log_debug(175U, "Forward", "btrpkt->n5= %d.\n", __nesc_ntoh_uint16(btrpkt->n5.nxdata));
                      sim_log_debug(176U, "Forward", "btrpkt->n6= %d.\n", __nesc_ntoh_uint16(btrpkt->n6.nxdata));
                      sim_log_debug(177U, "Forward", "temppkt6= %d.\n", __nesc_ntoh_uint16(temppkt->n6.nxdata));
                    }
                  else {
#line 1130
                    if ((__nesc_ntoh_uint16(btrpkt->n5.nxdata) == 100 && __nesc_ntoh_uint16(btrpkt->n4.nxdata) != 100 && __nesc_ntoh_uint16(btrpkt->n3.nxdata) != 100 && __nesc_ntoh_uint16(btrpkt->n2.nxdata) != 100 && __nesc_ntoh_uint16(btrpkt->n1.nxdata) != 100) || (__nesc_ntoh_uint16(btrpkt->n5.nxdata) == 100 && NetworkC$flag4[sim_node()] != 0)) {
                        __nesc_hton_uint16(temppkt->n5.nxdata, NetworkC$wa[sim_node()] / 1000);
                        NetworkC$flag5[sim_node()] = 1;
                        sim_log_debug(178U, "Forward", "temppkt5= %d.\n", __nesc_ntoh_uint16(temppkt->n5.nxdata));
                      }
                    else {
#line 1135
                      if ((__nesc_ntoh_uint16(btrpkt->n4.nxdata) == 100 && __nesc_ntoh_uint16(btrpkt->n3.nxdata) != 100 && __nesc_ntoh_uint16(btrpkt->n2.nxdata) != 100 && __nesc_ntoh_uint16(btrpkt->n1.nxdata) != 100) || (__nesc_ntoh_uint16(btrpkt->n4.nxdata) == 100 && NetworkC$flag3[sim_node()] != 0)) {
                          __nesc_hton_uint16(temppkt->n4.nxdata, NetworkC$wa[sim_node()] / 1000);
                          NetworkC$flag4[sim_node()] = 1;
                          sim_log_debug(179U, "Forward", "temppkt4= %d.\n", __nesc_ntoh_uint16(temppkt->n4.nxdata));
                        }
                      else {
#line 1140
                        if ((__nesc_ntoh_uint16(btrpkt->n3.nxdata) == 100 && __nesc_ntoh_uint16(btrpkt->n2.nxdata) != 100 && __nesc_ntoh_uint16(btrpkt->n1.nxdata) != 100) || (__nesc_ntoh_uint16(btrpkt->n3.nxdata) == 100 && NetworkC$flag2[sim_node()] != 0)) {
                            __nesc_hton_uint16(temppkt->n3.nxdata, NetworkC$wa[sim_node()] / 1000);
                            NetworkC$flag3[sim_node()] = 1;
                            sim_log_debug(180U, "Forward", "temppkt3= %d.\n", __nesc_ntoh_uint16(temppkt->n3.nxdata));
                          }
                        else {
#line 1145
                          if ((__nesc_ntoh_uint16(btrpkt->n2.nxdata) == 100 && __nesc_ntoh_uint16(btrpkt->n1.nxdata) != 100) || (__nesc_ntoh_uint16(btrpkt->n2.nxdata) == 100 && NetworkC$flag1[sim_node()] != 0)) {
                              __nesc_hton_uint16(temppkt->n2.nxdata, NetworkC$wa[sim_node()] / 1000);
                              NetworkC$flag2[sim_node()] = 1;
                              sim_log_debug(181U, "Forward", "temppkt2= %d.\n", __nesc_ntoh_uint16(temppkt->n2.nxdata));
                            }
                          else {
                            if (__nesc_ntoh_uint16(btrpkt->n1.nxdata) == 100) {
                                __nesc_hton_uint16(temppkt->n1.nxdata, NetworkC$wa[sim_node()] / 1000);
                                NetworkC$flag1[sim_node()] = 1;
                                sim_log_debug(182U, "Forward", "temppkt1= %d.\n", __nesc_ntoh_uint16(temppkt->n1.nxdata));
                              }
                            }
                          }
                        }
                      }
                    }
#line 1157
                  NetworkC$wa[sim_node()] = (NetworkC$wa[sim_node()] - NetworkC$wa[sim_node()] / 1000 * 1000) * 10;
                  NetworkC$wb[sim_node()] = (NetworkC$wb[sim_node()] - NetworkC$wb[sim_node()] / 1000 * 1000) * 10;
                  sim_log_debug(183U, "Forward", "wa1= %d.\n", NetworkC$wa[sim_node()]);
                  sim_log_debug(184U, "Forward", "wb1= %d.\n", NetworkC$wb[sim_node()]);

                  NetworkC$ws1[sim_node()] = NetworkC$weishu(NetworkC$wa[sim_node()]);
                  NetworkC$ws2[sim_node()] = NetworkC$weishu(NetworkC$wb[sim_node()]);
                  NetworkC$flag[sim_node()] = 1;
                }

              NetworkC$wa2[sim_node()] = (float )NetworkC$wa[sim_node()] / 10000;
              NetworkC$wb2[sim_node()] = (float )NetworkC$wb[sim_node()] / 10000;

              sim_log_debug(185U, "Forward", "wa2= %f.\n", NetworkC$wa2[sim_node()]);
              sim_log_debug(186U, "Forward", "wb2= %f.\n", NetworkC$wb2[sim_node()]);

              __nesc_hton_uint16(temppkt->a.nxdata, (int )(NetworkC$wa2[sim_node()] * NetworkC$z[sim_node()]));
              __nesc_hton_uint16(temppkt->b.nxdata, (int )(NetworkC$wb2[sim_node()] * NetworkC$z[sim_node()]));
              if (NetworkC$flag[sim_node()] == 0) {
                  __nesc_hton_uint16(temppkt->n1.nxdata, __nesc_ntoh_uint16(btrpkt->n1.nxdata));
                  __nesc_hton_uint16(temppkt->n2.nxdata, __nesc_ntoh_uint16(btrpkt->n2.nxdata));
                  __nesc_hton_uint16(temppkt->n3.nxdata, __nesc_ntoh_uint16(btrpkt->n3.nxdata));
                  __nesc_hton_uint16(temppkt->n4.nxdata, __nesc_ntoh_uint16(btrpkt->n4.nxdata));
                  __nesc_hton_uint16(temppkt->n5.nxdata, __nesc_ntoh_uint16(btrpkt->n5.nxdata));
                  __nesc_hton_uint16(temppkt->n6.nxdata, __nesc_ntoh_uint16(btrpkt->n6.nxdata));
                }
              else 
#line 1182
                {
                  NetworkC$pdflag(&NetworkC$flag[sim_node()], &NetworkC$flag1[sim_node()], &NetworkC$flag2[sim_node()], &NetworkC$flag3[sim_node()], &NetworkC$flag4[sim_node()], &NetworkC$flag5[sim_node()], &NetworkC$flag6[sim_node()], btrpkt, temppkt);
                }
              sim_log_debug(187U, "Forward", "temppkt->n1= %d.\n", __nesc_ntoh_uint16(temppkt->n1.nxdata));
              sim_log_debug(188U, "Forward", "temppkt->n2= %d.\n", __nesc_ntoh_uint16(temppkt->n2.nxdata));
              sim_log_debug(189U, "Forward", "temppkt->n3= %d.\n", __nesc_ntoh_uint16(temppkt->n3.nxdata));
              sim_log_debug(190U, "Forward", "temppkt->n4= %d.\n", __nesc_ntoh_uint16(temppkt->n4.nxdata));
              sim_log_debug(191U, "Forward", "temppkt->n5= %d.\n", __nesc_ntoh_uint16(temppkt->n5.nxdata));
              sim_log_debug(192U, "Forward", "temppkt->n6= %d.\n", __nesc_ntoh_uint16(temppkt->n6.nxdata));

              __nesc_hton_uint16(temppkt->nodeid.nxdata, TOS_NODE_ID);
              __nesc_hton_uint16(temppkt->sourceid.nxdata, __nesc_ntoh_uint16(btrpkt->sourceid.nxdata));
              __nesc_hton_uint16(temppkt->count.nxdata, __nesc_ntoh_uint16(btrpkt->count.nxdata));

              sim_log_debug(193U, "Forward", "m9-5= %f.\n", NetworkC$m[sim_node()]);
              sim_log_debug(194U, "Forward", "n9-5= %f.\n", NetworkC$n[sim_node()]);
              sim_log_debug(195U, "Forward", "a9-5= %d.\n", __nesc_ntoh_uint16(temppkt->a.nxdata));
              sim_log_debug(196U, "Forward", "b9-5= %d.\n", __nesc_ntoh_uint16(temppkt->b.nxdata));

              if (!NetworkC$busy[sim_node()]) {
                  if (NetworkC$AMSend$send(AM_BROADCAST_ADDR, &NetworkC$pkt[sim_node()], sizeof(NetworkMsg )) == SUCCESS) {
                      NetworkC$busy[sim_node()] = TRUE;
                    }
                }
            }
          if (__nesc_ntoh_uint16(btrpkt->nodeid.nxdata) == 8) {
              NetworkMsg *temppkt = (NetworkMsg *)NetworkC$Packet$getPayload(&NetworkC$pkt[sim_node()], sizeof(NetworkMsg ));

              NetworkC$ssbm(btrpkt);
              NetworkC$wa[sim_node()] = NetworkC$m[sim_node()] * 10000;
              NetworkC$wb[sim_node()] = NetworkC$n[sim_node()] * 10000;

              NetworkC$ws1[sim_node()] = NetworkC$weishu(NetworkC$wa[sim_node()]);
              NetworkC$ws2[sim_node()] = NetworkC$weishu(NetworkC$wb[sim_node()]);
              sim_log_debug(197U, "Forward", "ws1= %d.\n", NetworkC$ws1[sim_node()]);
              sim_log_debug(198U, "Forward", "ws2= %d.\n", NetworkC$ws2[sim_node()]);
              while (NetworkC$ws1[sim_node()] == NetworkC$ws2[sim_node()] && NetworkC$wa[sim_node()] / 1000 == NetworkC$wb[sim_node()] / 1000) {
                  printf("@@@@@@@@@@@@@@@@@@@");

                  if ((__nesc_ntoh_uint16(btrpkt->n6.nxdata) == 100 && __nesc_ntoh_uint16(btrpkt->n5.nxdata) != 100 && __nesc_ntoh_uint16(btrpkt->n4.nxdata) != 100 && __nesc_ntoh_uint16(btrpkt->n3.nxdata) != 100 && __nesc_ntoh_uint16(btrpkt->n2.nxdata) != 100 && __nesc_ntoh_uint16(btrpkt->n1.nxdata) != 100) || (__nesc_ntoh_uint16(btrpkt->n6.nxdata) == 100 && NetworkC$flag5[sim_node()] != 0)) {
                      __nesc_hton_uint16(temppkt->n6.nxdata, NetworkC$wa[sim_node()] / 1000);
                      NetworkC$flag6[sim_node()] = 1;
                      sim_log_debug(199U, "Forward", "btrpkt->n1= %d.\n", __nesc_ntoh_uint16(btrpkt->n1.nxdata));
                      sim_log_debug(200U, "Forward", "btrpkt->n2= %d.\n", __nesc_ntoh_uint16(btrpkt->n2.nxdata));
                      sim_log_debug(201U, "Forward", "btrpkt->n3= %d.\n", __nesc_ntoh_uint16(btrpkt->n3.nxdata));
                      sim_log_debug(202U, "Forward", "btrpkt->n4= %d.\n", __nesc_ntoh_uint16(btrpkt->n4.nxdata));
                      sim_log_debug(203U, "Forward", "btrpkt->n5= %d.\n", __nesc_ntoh_uint16(btrpkt->n5.nxdata));
                      sim_log_debug(204U, "Forward", "btrpkt->n6= %d.\n", __nesc_ntoh_uint16(btrpkt->n6.nxdata));
                      sim_log_debug(205U, "Forward", "temppkt6= %d.\n", __nesc_ntoh_uint16(temppkt->n6.nxdata));
                    }
                  else {
#line 1232
                    if ((__nesc_ntoh_uint16(btrpkt->n5.nxdata) == 100 && __nesc_ntoh_uint16(btrpkt->n4.nxdata) != 100 && __nesc_ntoh_uint16(btrpkt->n3.nxdata) != 100 && __nesc_ntoh_uint16(btrpkt->n2.nxdata) != 100 && __nesc_ntoh_uint16(btrpkt->n1.nxdata) != 100) || (__nesc_ntoh_uint16(btrpkt->n5.nxdata) == 100 && NetworkC$flag4[sim_node()] != 0)) {
                        __nesc_hton_uint16(temppkt->n5.nxdata, NetworkC$wa[sim_node()] / 1000);
                        NetworkC$flag5[sim_node()] = 1;
                        sim_log_debug(206U, "Forward", "temppkt5= %d.\n", __nesc_ntoh_uint16(temppkt->n5.nxdata));
                      }
                    else {
#line 1237
                      if ((__nesc_ntoh_uint16(btrpkt->n4.nxdata) == 100 && __nesc_ntoh_uint16(btrpkt->n3.nxdata) != 100 && __nesc_ntoh_uint16(btrpkt->n2.nxdata) != 100 && __nesc_ntoh_uint16(btrpkt->n1.nxdata) != 100) || (__nesc_ntoh_uint16(btrpkt->n4.nxdata) == 100 && NetworkC$flag3[sim_node()] != 0)) {
                          __nesc_hton_uint16(temppkt->n4.nxdata, NetworkC$wa[sim_node()] / 1000);
                          NetworkC$flag4[sim_node()] = 1;
                          sim_log_debug(207U, "Forward", "temppkt4= %d.\n", __nesc_ntoh_uint16(temppkt->n4.nxdata));
                        }
                      else {
#line 1242
                        if ((__nesc_ntoh_uint16(btrpkt->n3.nxdata) == 100 && __nesc_ntoh_uint16(btrpkt->n2.nxdata) != 100 && __nesc_ntoh_uint16(btrpkt->n1.nxdata) != 100) || (__nesc_ntoh_uint16(btrpkt->n3.nxdata) == 100 && NetworkC$flag2[sim_node()] != 0)) {
                            __nesc_hton_uint16(temppkt->n3.nxdata, NetworkC$wa[sim_node()] / 1000);
                            NetworkC$flag3[sim_node()] = 1;
                            sim_log_debug(208U, "Forward", "temppkt3= %d.\n", __nesc_ntoh_uint16(temppkt->n3.nxdata));
                          }
                        else {
#line 1247
                          if ((__nesc_ntoh_uint16(btrpkt->n2.nxdata) == 100 && __nesc_ntoh_uint16(btrpkt->n1.nxdata) != 100) || (__nesc_ntoh_uint16(btrpkt->n2.nxdata) == 100 && NetworkC$flag1[sim_node()] != 0)) {
                              __nesc_hton_uint16(temppkt->n2.nxdata, NetworkC$wa[sim_node()] / 1000);
                              NetworkC$flag2[sim_node()] = 1;
                              sim_log_debug(209U, "Forward", "temppkt2= %d.\n", __nesc_ntoh_uint16(temppkt->n2.nxdata));
                            }
                          else {
                            if (__nesc_ntoh_uint16(btrpkt->n1.nxdata) == 100) {
                                __nesc_hton_uint16(temppkt->n1.nxdata, NetworkC$wa[sim_node()] / 1000);
                                NetworkC$flag1[sim_node()] = 1;
                                sim_log_debug(210U, "Forward", "temppkt1= %d.\n", __nesc_ntoh_uint16(temppkt->n1.nxdata));
                              }
                            }
                          }
                        }
                      }
                    }
#line 1259
                  NetworkC$wa[sim_node()] = (NetworkC$wa[sim_node()] - NetworkC$wa[sim_node()] / 1000 * 1000) * 10;
                  NetworkC$wb[sim_node()] = (NetworkC$wb[sim_node()] - NetworkC$wb[sim_node()] / 1000 * 1000) * 10;
                  sim_log_debug(211U, "Forward", "wa1= %d.\n", NetworkC$wa[sim_node()]);
                  sim_log_debug(212U, "Forward", "wb1= %d.\n", NetworkC$wb[sim_node()]);

                  NetworkC$ws1[sim_node()] = NetworkC$weishu(NetworkC$wa[sim_node()]);
                  NetworkC$ws2[sim_node()] = NetworkC$weishu(NetworkC$wb[sim_node()]);
                  NetworkC$flag[sim_node()] = 1;
                }

              NetworkC$wa2[sim_node()] = (float )NetworkC$wa[sim_node()] / 10000;
              NetworkC$wb2[sim_node()] = (float )NetworkC$wb[sim_node()] / 10000;

              sim_log_debug(213U, "Forward", "wa2= %f.\n", NetworkC$wa2[sim_node()]);
              sim_log_debug(214U, "Forward", "wb2= %f.\n", NetworkC$wb2[sim_node()]);

              __nesc_hton_uint16(temppkt->a.nxdata, (int )(NetworkC$wa2[sim_node()] * NetworkC$z[sim_node()]));
              __nesc_hton_uint16(temppkt->b.nxdata, (int )(NetworkC$wb2[sim_node()] * NetworkC$z[sim_node()]));
              if (NetworkC$flag[sim_node()] == 0) {
                  __nesc_hton_uint16(temppkt->n1.nxdata, __nesc_ntoh_uint16(btrpkt->n1.nxdata));
                  __nesc_hton_uint16(temppkt->n2.nxdata, __nesc_ntoh_uint16(btrpkt->n2.nxdata));
                  __nesc_hton_uint16(temppkt->n3.nxdata, __nesc_ntoh_uint16(btrpkt->n3.nxdata));
                  __nesc_hton_uint16(temppkt->n4.nxdata, __nesc_ntoh_uint16(btrpkt->n4.nxdata));
                  __nesc_hton_uint16(temppkt->n5.nxdata, __nesc_ntoh_uint16(btrpkt->n5.nxdata));
                  __nesc_hton_uint16(temppkt->n6.nxdata, __nesc_ntoh_uint16(btrpkt->n6.nxdata));
                }
              else 
#line 1284
                {
                  NetworkC$pdflag(&NetworkC$flag[sim_node()], &NetworkC$flag1[sim_node()], &NetworkC$flag2[sim_node()], &NetworkC$flag3[sim_node()], &NetworkC$flag4[sim_node()], &NetworkC$flag5[sim_node()], &NetworkC$flag6[sim_node()], btrpkt, temppkt);
                }
              sim_log_debug(215U, "Forward", "temppkt->n1= %d.\n", __nesc_ntoh_uint16(temppkt->n1.nxdata));
              sim_log_debug(216U, "Forward", "temppkt->n2= %d.\n", __nesc_ntoh_uint16(temppkt->n2.nxdata));
              sim_log_debug(217U, "Forward", "temppkt->n3= %d.\n", __nesc_ntoh_uint16(temppkt->n3.nxdata));
              sim_log_debug(218U, "Forward", "temppkt->n4= %d.\n", __nesc_ntoh_uint16(temppkt->n4.nxdata));
              sim_log_debug(219U, "Forward", "temppkt->n5= %d.\n", __nesc_ntoh_uint16(temppkt->n5.nxdata));
              sim_log_debug(220U, "Forward", "temppkt->n6= %d.\n", __nesc_ntoh_uint16(temppkt->n6.nxdata));

              sim_log_debug(221U, "Forward", "m8-5= %f.\n", NetworkC$m[sim_node()]);
              sim_log_debug(222U, "Forward", "n8-5= %f.\n", NetworkC$n[sim_node()]);

              __nesc_hton_uint16(temppkt->nodeid.nxdata, TOS_NODE_ID);
              __nesc_hton_uint16(temppkt->sourceid.nxdata, __nesc_ntoh_uint16(btrpkt->sourceid.nxdata));
              __nesc_hton_uint16(temppkt->count.nxdata, __nesc_ntoh_uint16(btrpkt->count.nxdata));

              sim_log_debug(223U, "Forward", "a8-5= %d.\n", __nesc_ntoh_uint16(temppkt->a.nxdata));
              sim_log_debug(224U, "Forward", "b8-5= %d.\n", __nesc_ntoh_uint16(temppkt->b.nxdata));
              if (!NetworkC$busy[sim_node()]) {
                  if (NetworkC$AMSend$send(AM_BROADCAST_ADDR, &NetworkC$pkt[sim_node()], sizeof(NetworkMsg )) == SUCCESS) {
                      NetworkC$busy[sim_node()] = TRUE;
                    }
                }
            }
        }

      if (TOS_NODE_ID == 6 && __nesc_ntoh_uint16(btrpkt->nodeid.nxdata) == 9) {
          NetworkMsg *temppkt = (NetworkMsg *)NetworkC$Packet$getPayload(&NetworkC$pkt[sim_node()], sizeof(NetworkMsg ));

#line 1313
          sim_log_debug(225U, "Forward", "r96= %d.\n", NetworkC$r96[sim_node()]);
          NetworkC$ssbm(btrpkt);

          NetworkC$wa[sim_node()] = NetworkC$m[sim_node()] * 10000;
          NetworkC$wb[sim_node()] = NetworkC$n[sim_node()] * 10000;

          NetworkC$ws1[sim_node()] = NetworkC$weishu(NetworkC$wa[sim_node()]);
          NetworkC$ws2[sim_node()] = NetworkC$weishu(NetworkC$wb[sim_node()]);
          sim_log_debug(226U, "Forward", "ws1= %d.\n", NetworkC$ws1[sim_node()]);
          sim_log_debug(227U, "Forward", "ws2= %d.\n", NetworkC$ws2[sim_node()]);
          while (NetworkC$ws1[sim_node()] == NetworkC$ws2[sim_node()] && NetworkC$wa[sim_node()] / 1000 == NetworkC$wb[sim_node()] / 1000) {

              if ((__nesc_ntoh_uint16(btrpkt->n6.nxdata) == 100 && __nesc_ntoh_uint16(btrpkt->n5.nxdata) != 100 && __nesc_ntoh_uint16(btrpkt->n4.nxdata) != 100 && __nesc_ntoh_uint16(btrpkt->n3.nxdata) != 100 && __nesc_ntoh_uint16(btrpkt->n2.nxdata) != 100 && __nesc_ntoh_uint16(btrpkt->n1.nxdata) != 100) || (__nesc_ntoh_uint16(btrpkt->n6.nxdata) == 100 && NetworkC$flag5[sim_node()] != 0)) {
                  __nesc_hton_uint16(temppkt->n6.nxdata, NetworkC$wa[sim_node()] / 1000);
                  NetworkC$flag6[sim_node()] = 1;
                  sim_log_debug(228U, "Forward", "btrpkt->n1= %d.\n", __nesc_ntoh_uint16(btrpkt->n1.nxdata));
                  sim_log_debug(229U, "Forward", "btrpkt->n2= %d.\n", __nesc_ntoh_uint16(btrpkt->n2.nxdata));
                  sim_log_debug(230U, "Forward", "btrpkt->n3= %d.\n", __nesc_ntoh_uint16(btrpkt->n3.nxdata));
                  sim_log_debug(231U, "Forward", "btrpkt->n4= %d.\n", __nesc_ntoh_uint16(btrpkt->n4.nxdata));
                  sim_log_debug(232U, "Forward", "btrpkt->n5= %d.\n", __nesc_ntoh_uint16(btrpkt->n5.nxdata));
                  sim_log_debug(233U, "Forward", "btrpkt->n6= %d.\n", __nesc_ntoh_uint16(btrpkt->n6.nxdata));
                  sim_log_debug(234U, "Forward", "temppkt6= %d.\n", __nesc_ntoh_uint16(temppkt->n6.nxdata));
                }
              else {
#line 1336
                if ((__nesc_ntoh_uint16(btrpkt->n5.nxdata) == 100 && __nesc_ntoh_uint16(btrpkt->n4.nxdata) != 100 && __nesc_ntoh_uint16(btrpkt->n3.nxdata) != 100 && __nesc_ntoh_uint16(btrpkt->n2.nxdata) != 100 && __nesc_ntoh_uint16(btrpkt->n1.nxdata) != 100) || (__nesc_ntoh_uint16(btrpkt->n5.nxdata) == 100 && NetworkC$flag4[sim_node()] != 0)) {
                    __nesc_hton_uint16(temppkt->n5.nxdata, NetworkC$wa[sim_node()] / 1000);
                    NetworkC$flag5[sim_node()] = 1;
                    sim_log_debug(235U, "Forward", "temppkt5= %d.\n", __nesc_ntoh_uint16(temppkt->n5.nxdata));
                  }
                else {
#line 1341
                  if ((__nesc_ntoh_uint16(btrpkt->n4.nxdata) == 100 && __nesc_ntoh_uint16(btrpkt->n3.nxdata) != 100 && __nesc_ntoh_uint16(btrpkt->n2.nxdata) != 100 && __nesc_ntoh_uint16(btrpkt->n1.nxdata) != 100) || (__nesc_ntoh_uint16(btrpkt->n4.nxdata) == 100 && NetworkC$flag3[sim_node()] != 0)) {
                      __nesc_hton_uint16(temppkt->n4.nxdata, NetworkC$wa[sim_node()] / 1000);
                      NetworkC$flag4[sim_node()] = 1;
                      sim_log_debug(236U, "Forward", "temppkt4= %d.\n", __nesc_ntoh_uint16(temppkt->n4.nxdata));
                    }
                  else {
#line 1346
                    if ((__nesc_ntoh_uint16(btrpkt->n3.nxdata) == 100 && __nesc_ntoh_uint16(btrpkt->n2.nxdata) != 100 && __nesc_ntoh_uint16(btrpkt->n1.nxdata) != 100) || (__nesc_ntoh_uint16(btrpkt->n3.nxdata) == 100 && NetworkC$flag2[sim_node()] != 0)) {
                        __nesc_hton_uint16(temppkt->n3.nxdata, NetworkC$wa[sim_node()] / 1000);
                        NetworkC$flag3[sim_node()] = 1;
                        sim_log_debug(237U, "Forward", "temppkt3= %d.\n", __nesc_ntoh_uint16(temppkt->n3.nxdata));
                      }
                    else {
#line 1351
                      if ((__nesc_ntoh_uint16(btrpkt->n2.nxdata) == 100 && __nesc_ntoh_uint16(btrpkt->n1.nxdata) != 100) || (__nesc_ntoh_uint16(btrpkt->n2.nxdata) == 100 && NetworkC$flag1[sim_node()] != 0)) {
                          __nesc_hton_uint16(temppkt->n2.nxdata, NetworkC$wa[sim_node()] / 1000);
                          NetworkC$flag2[sim_node()] = 1;

                          sim_log_debug(238U, "Forward", "temppkt2= %d.\n", __nesc_ntoh_uint16(temppkt->n2.nxdata));
                        }
                      else {

                        if (__nesc_ntoh_uint16(btrpkt->n1.nxdata) == 100) {
                            __nesc_hton_uint16(temppkt->n1.nxdata, NetworkC$wa[sim_node()] / 1000);
                            NetworkC$flag1[sim_node()] = 1;
                            sim_log_debug(239U, "Forward", "temppkt1= %d.\n", __nesc_ntoh_uint16(temppkt->n1.nxdata));
                          }
                        }
                      }
                    }
                  }
                }
#line 1365
              NetworkC$wa[sim_node()] = (NetworkC$wa[sim_node()] - NetworkC$wa[sim_node()] / 1000 * 1000) * 10;
              NetworkC$wb[sim_node()] = (NetworkC$wb[sim_node()] - NetworkC$wb[sim_node()] / 1000 * 1000) * 10;
              sim_log_debug(240U, "Forward", "wa1= %d.\n", NetworkC$wa[sim_node()]);
              sim_log_debug(241U, "Forward", "wb1= %d.\n", NetworkC$wb[sim_node()]);

              NetworkC$ws1[sim_node()] = NetworkC$weishu(NetworkC$wa[sim_node()]);
              NetworkC$ws2[sim_node()] = NetworkC$weishu(NetworkC$wb[sim_node()]);
              NetworkC$flag[sim_node()] = 1;
            }

          NetworkC$wa2[sim_node()] = (float )NetworkC$wa[sim_node()] / 10000;
          NetworkC$wb2[sim_node()] = (float )NetworkC$wb[sim_node()] / 10000;

          sim_log_debug(242U, "Forward", "wa2= %f.\n", NetworkC$wa2[sim_node()]);
          sim_log_debug(243U, "Forward", "wb2= %f.\n", NetworkC$wb2[sim_node()]);

          __nesc_hton_uint16(temppkt->a.nxdata, (int )(NetworkC$wa2[sim_node()] * NetworkC$z[sim_node()]));
          __nesc_hton_uint16(temppkt->b.nxdata, (int )(NetworkC$wb2[sim_node()] * NetworkC$z[sim_node()]));
          if (NetworkC$flag[sim_node()] == 0) {
              __nesc_hton_uint16(temppkt->n1.nxdata, __nesc_ntoh_uint16(btrpkt->n1.nxdata));
              __nesc_hton_uint16(temppkt->n2.nxdata, __nesc_ntoh_uint16(btrpkt->n2.nxdata));
              __nesc_hton_uint16(temppkt->n3.nxdata, __nesc_ntoh_uint16(btrpkt->n3.nxdata));
              __nesc_hton_uint16(temppkt->n4.nxdata, __nesc_ntoh_uint16(btrpkt->n4.nxdata));
              __nesc_hton_uint16(temppkt->n5.nxdata, __nesc_ntoh_uint16(btrpkt->n5.nxdata));
              __nesc_hton_uint16(temppkt->n6.nxdata, __nesc_ntoh_uint16(btrpkt->n6.nxdata));
            }
          else 
#line 1390
            {
              NetworkC$pdflag(&NetworkC$flag[sim_node()], &NetworkC$flag1[sim_node()], &NetworkC$flag2[sim_node()], &NetworkC$flag3[sim_node()], &NetworkC$flag4[sim_node()], &NetworkC$flag5[sim_node()], &NetworkC$flag6[sim_node()], btrpkt, temppkt);
            }
          sim_log_debug(244U, "Forward", "temppkt->n1= %d.\n", __nesc_ntoh_uint16(temppkt->n1.nxdata));
          sim_log_debug(245U, "Forward", "temppkt->n2= %d.\n", __nesc_ntoh_uint16(temppkt->n2.nxdata));
          sim_log_debug(246U, "Forward", "temppkt->n3= %d.\n", __nesc_ntoh_uint16(temppkt->n3.nxdata));
          sim_log_debug(247U, "Forward", "temppkt->n4= %d.\n", __nesc_ntoh_uint16(temppkt->n4.nxdata));
          sim_log_debug(248U, "Forward", "temppkt->n5= %d.\n", __nesc_ntoh_uint16(temppkt->n5.nxdata));
          sim_log_debug(249U, "Forward", "temppkt->n6= %d.\n", __nesc_ntoh_uint16(temppkt->n6.nxdata));

          sim_log_debug(250U, "Forward", "m9-6= %f.\n", NetworkC$m[sim_node()]);
          sim_log_debug(251U, "Forward", "n9-6= %f.\n", NetworkC$n[sim_node()]);
          sim_log_debug(252U, "Forward", "a9-6= %d.\n", __nesc_ntoh_uint16(temppkt->a.nxdata));
          sim_log_debug(253U, "Forward", "b9-6= %d.\n", __nesc_ntoh_uint16(temppkt->b.nxdata));

          __nesc_hton_uint16(temppkt->nodeid.nxdata, TOS_NODE_ID);
          __nesc_hton_uint16(temppkt->sourceid.nxdata, __nesc_ntoh_uint16(btrpkt->sourceid.nxdata));
          __nesc_hton_uint16(temppkt->count.nxdata, __nesc_ntoh_uint16(btrpkt->count.nxdata));
          if (!NetworkC$busy[sim_node()]) {
              if (NetworkC$AMSend$send(AM_BROADCAST_ADDR, &NetworkC$pkt[sim_node()], sizeof(NetworkMsg )) == SUCCESS) {
                  NetworkC$busy[sim_node()] = TRUE;
                }
            }
        }

      if (TOS_NODE_ID == 4) {
          sim_log_debug(254U, "Forward", "r5784= %d.\n", NetworkC$r5784[sim_node()]);
          sim_log_debug(255U, "Forward", "r54= %d.\n", NetworkC$r54[sim_node()]);
          sim_log_debug(256U, "Forward", "r74= %d.\n", NetworkC$r74[sim_node()]);
          sim_log_debug(257U, "Forward", "r84= %d.\n", NetworkC$r84[sim_node()]);
          sim_log_debug(258U, "Forward", "s4[0]= %f.\n", NetworkC$s4[sim_node()][0]);
          sim_log_debug(259U, "Forward", "s4[1]= %f.\n", NetworkC$s4[sim_node()][1]);
          sim_log_debug(260U, "Forward", "s4[2]= %f.\n", NetworkC$s4[sim_node()][2]);
          sim_log_debug(261U, "Forward", "s4[3]= %f.\n", NetworkC$s4[sim_node()][3]);
          sim_log_debug(262U, "Forward", "s4[4]= %f.\n", NetworkC$s4[sim_node()][4]);
          sim_log_debug(263U, "Forward", "s4[5]= %f.\n", NetworkC$s4[sim_node()][5]);

          if (__nesc_ntoh_uint16(btrpkt->nodeid.nxdata) == 8) {
              NetworkMsg *temppkt = (NetworkMsg *)NetworkC$Packet$getPayload(&NetworkC$pkt[sim_node()], sizeof(NetworkMsg ));

              NetworkC$ssbm(btrpkt);
              NetworkC$wa[sim_node()] = NetworkC$m[sim_node()] * 10000;
              NetworkC$wb[sim_node()] = NetworkC$n[sim_node()] * 10000;

              NetworkC$ws1[sim_node()] = NetworkC$weishu(NetworkC$wa[sim_node()]);
              NetworkC$ws2[sim_node()] = NetworkC$weishu(NetworkC$wb[sim_node()]);
              sim_log_debug(264U, "Forward", "ws1= %d.\n", NetworkC$ws1[sim_node()]);
              sim_log_debug(265U, "Forward", "ws2= %d.\n", NetworkC$ws2[sim_node()]);
              while (NetworkC$ws1[sim_node()] == NetworkC$ws2[sim_node()] && NetworkC$wa[sim_node()] / 1000 == NetworkC$wb[sim_node()] / 1000) {
                  printf("@@@@@@@@@@@@@@@@@@@");

                  if ((__nesc_ntoh_uint16(btrpkt->n6.nxdata) == 100 && __nesc_ntoh_uint16(btrpkt->n5.nxdata) != 100 && __nesc_ntoh_uint16(btrpkt->n4.nxdata) != 100 && __nesc_ntoh_uint16(btrpkt->n3.nxdata) != 100 && __nesc_ntoh_uint16(btrpkt->n2.nxdata) != 100 && __nesc_ntoh_uint16(btrpkt->n1.nxdata) != 100) || (__nesc_ntoh_uint16(btrpkt->n6.nxdata) == 100 && NetworkC$flag5[sim_node()] != 0)) {
                      __nesc_hton_uint16(temppkt->n6.nxdata, NetworkC$wa[sim_node()] / 1000);
                      NetworkC$flag6[sim_node()] = 1;
                      sim_log_debug(266U, "Forward", "btrpkt->n1= %d.\n", __nesc_ntoh_uint16(btrpkt->n1.nxdata));
                      sim_log_debug(267U, "Forward", "btrpkt->n2= %d.\n", __nesc_ntoh_uint16(btrpkt->n2.nxdata));
                      sim_log_debug(268U, "Forward", "btrpkt->n3= %d.\n", __nesc_ntoh_uint16(btrpkt->n3.nxdata));
                      sim_log_debug(269U, "Forward", "btrpkt->n4= %d.\n", __nesc_ntoh_uint16(btrpkt->n4.nxdata));
                      sim_log_debug(270U, "Forward", "btrpkt->n5= %d.\n", __nesc_ntoh_uint16(btrpkt->n5.nxdata));
                      sim_log_debug(271U, "Forward", "btrpkt->n6= %d.\n", __nesc_ntoh_uint16(btrpkt->n6.nxdata));
                      sim_log_debug(272U, "Forward", "temppkt6= %d.\n", __nesc_ntoh_uint16(temppkt->n6.nxdata));
                    }
                  else {
#line 1452
                    if ((__nesc_ntoh_uint16(btrpkt->n5.nxdata) == 100 && __nesc_ntoh_uint16(btrpkt->n4.nxdata) != 100 && __nesc_ntoh_uint16(btrpkt->n3.nxdata) != 100 && __nesc_ntoh_uint16(btrpkt->n2.nxdata) != 100 && __nesc_ntoh_uint16(btrpkt->n1.nxdata) != 100) || (__nesc_ntoh_uint16(btrpkt->n5.nxdata) == 100 && NetworkC$flag4[sim_node()] != 0)) {
                        __nesc_hton_uint16(temppkt->n5.nxdata, NetworkC$wa[sim_node()] / 1000);
                        NetworkC$flag5[sim_node()] = 1;
                        sim_log_debug(273U, "Forward", "temppkt5= %d.\n", __nesc_ntoh_uint16(temppkt->n5.nxdata));
                      }
                    else {
#line 1457
                      if ((__nesc_ntoh_uint16(btrpkt->n4.nxdata) == 100 && __nesc_ntoh_uint16(btrpkt->n3.nxdata) != 100 && __nesc_ntoh_uint16(btrpkt->n2.nxdata) != 100 && __nesc_ntoh_uint16(btrpkt->n1.nxdata) != 100) || (__nesc_ntoh_uint16(btrpkt->n4.nxdata) == 100 && NetworkC$flag3[sim_node()] != 0)) {
                          __nesc_hton_uint16(temppkt->n4.nxdata, NetworkC$wa[sim_node()] / 1000);
                          NetworkC$flag4[sim_node()] = 1;
                          sim_log_debug(274U, "Forward", "temppkt4= %d.\n", __nesc_ntoh_uint16(temppkt->n4.nxdata));
                        }
                      else {
#line 1462
                        if ((__nesc_ntoh_uint16(btrpkt->n3.nxdata) == 100 && __nesc_ntoh_uint16(btrpkt->n2.nxdata) != 100 && __nesc_ntoh_uint16(btrpkt->n1.nxdata) != 100) || (__nesc_ntoh_uint16(btrpkt->n3.nxdata) == 100 && NetworkC$flag2[sim_node()] != 0)) {
                            __nesc_hton_uint16(temppkt->n3.nxdata, NetworkC$wa[sim_node()] / 1000);
                            NetworkC$flag3[sim_node()] = 1;
                            sim_log_debug(275U, "Forward", "temppkt3= %d.\n", __nesc_ntoh_uint16(temppkt->n3.nxdata));
                          }
                        else {
#line 1467
                          if ((__nesc_ntoh_uint16(btrpkt->n2.nxdata) == 100 && __nesc_ntoh_uint16(btrpkt->n1.nxdata) != 100) || (__nesc_ntoh_uint16(btrpkt->n2.nxdata) == 100 && NetworkC$flag1[sim_node()] != 0)) {
                              __nesc_hton_uint16(temppkt->n2.nxdata, NetworkC$wa[sim_node()] / 1000);
                              NetworkC$flag2[sim_node()] = 1;
                              sim_log_debug(276U, "Forward", "temppkt2= %d.\n", __nesc_ntoh_uint16(temppkt->n2.nxdata));
                            }
                          else {
                            if (__nesc_ntoh_uint16(btrpkt->n1.nxdata) == 100) {
                                __nesc_hton_uint16(temppkt->n1.nxdata, NetworkC$wa[sim_node()] / 1000);
                                NetworkC$flag1[sim_node()] = 1;
                                sim_log_debug(277U, "Forward", "temppkt1= %d.\n", __nesc_ntoh_uint16(temppkt->n1.nxdata));
                              }
                            }
                          }
                        }
                      }
                    }
#line 1479
                  NetworkC$wa[sim_node()] = (NetworkC$wa[sim_node()] - NetworkC$wa[sim_node()] / 1000 * 1000) * 10;
                  NetworkC$wb[sim_node()] = (NetworkC$wb[sim_node()] - NetworkC$wb[sim_node()] / 1000 * 1000) * 10;
                  sim_log_debug(278U, "Forward", "wa1= %d.\n", NetworkC$wa[sim_node()]);
                  sim_log_debug(279U, "Forward", "wb1= %d.\n", NetworkC$wb[sim_node()]);

                  NetworkC$ws1[sim_node()] = NetworkC$weishu(NetworkC$wa[sim_node()]);
                  NetworkC$ws2[sim_node()] = NetworkC$weishu(NetworkC$wb[sim_node()]);
                  NetworkC$flag[sim_node()] = 1;
                }

              NetworkC$wa2[sim_node()] = (float )NetworkC$wa[sim_node()] / 10000;
              NetworkC$wb2[sim_node()] = (float )NetworkC$wb[sim_node()] / 10000;

              sim_log_debug(280U, "Forward", "wa2= %f.\n", NetworkC$wa2[sim_node()]);
              sim_log_debug(281U, "Forward", "wb2= %f.\n", NetworkC$wb2[sim_node()]);

              __nesc_hton_uint16(temppkt->a.nxdata, (int )(NetworkC$wa2[sim_node()] * NetworkC$z[sim_node()]));
              __nesc_hton_uint16(temppkt->b.nxdata, (int )(NetworkC$wb2[sim_node()] * NetworkC$z[sim_node()]));
              if (NetworkC$flag[sim_node()] == 0) {
                  __nesc_hton_uint16(temppkt->n1.nxdata, __nesc_ntoh_uint16(btrpkt->n1.nxdata));
                  __nesc_hton_uint16(temppkt->n2.nxdata, __nesc_ntoh_uint16(btrpkt->n2.nxdata));
                  __nesc_hton_uint16(temppkt->n3.nxdata, __nesc_ntoh_uint16(btrpkt->n3.nxdata));
                  __nesc_hton_uint16(temppkt->n4.nxdata, __nesc_ntoh_uint16(btrpkt->n4.nxdata));
                  __nesc_hton_uint16(temppkt->n5.nxdata, __nesc_ntoh_uint16(btrpkt->n5.nxdata));
                  __nesc_hton_uint16(temppkt->n6.nxdata, __nesc_ntoh_uint16(btrpkt->n6.nxdata));
                }
              else 
#line 1504
                {
                  NetworkC$pdflag(&NetworkC$flag[sim_node()], &NetworkC$flag1[sim_node()], &NetworkC$flag2[sim_node()], &NetworkC$flag3[sim_node()], &NetworkC$flag4[sim_node()], &NetworkC$flag5[sim_node()], &NetworkC$flag6[sim_node()], btrpkt, temppkt);
                }
              sim_log_debug(282U, "Forward", "temppkt->n1= %d.\n", __nesc_ntoh_uint16(temppkt->n1.nxdata));
              sim_log_debug(283U, "Forward", "temppkt->n2= %d.\n", __nesc_ntoh_uint16(temppkt->n2.nxdata));
              sim_log_debug(284U, "Forward", "temppkt->n3= %d.\n", __nesc_ntoh_uint16(temppkt->n3.nxdata));
              sim_log_debug(285U, "Forward", "temppkt->n4= %d.\n", __nesc_ntoh_uint16(temppkt->n4.nxdata));
              sim_log_debug(286U, "Forward", "temppkt->n5= %d.\n", __nesc_ntoh_uint16(temppkt->n5.nxdata));
              sim_log_debug(287U, "Forward", "temppkt->n6= %d.\n", __nesc_ntoh_uint16(temppkt->n6.nxdata));

              sim_log_debug(288U, "Forward", "m8-4= %f.\n", NetworkC$m[sim_node()]);
              sim_log_debug(289U, "Forward", "n8-4= %f.\n", NetworkC$n[sim_node()]);
              sim_log_debug(290U, "Forward", "a8-4= %d.\n", __nesc_ntoh_uint16(temppkt->a.nxdata));
              sim_log_debug(291U, "Forward", "b8-4= %d.\n", __nesc_ntoh_uint16(temppkt->b.nxdata));

              __nesc_hton_uint16(temppkt->nodeid.nxdata, TOS_NODE_ID);
              __nesc_hton_uint16(temppkt->sourceid.nxdata, __nesc_ntoh_uint16(btrpkt->sourceid.nxdata));
              __nesc_hton_uint16(temppkt->count.nxdata, __nesc_ntoh_uint16(btrpkt->count.nxdata));
              if (!NetworkC$busy[sim_node()]) {
                  if (NetworkC$AMSend$send(AM_BROADCAST_ADDR, &NetworkC$pkt[sim_node()], sizeof(NetworkMsg )) == SUCCESS) {
                      NetworkC$busy[sim_node()] = TRUE;
                    }
                }
            }
          if (__nesc_ntoh_uint16(btrpkt->nodeid.nxdata) == 7) {
              NetworkMsg *temppkt = (NetworkMsg *)NetworkC$Packet$getPayload(&NetworkC$pkt[sim_node()], sizeof(NetworkMsg ));

              NetworkC$ssbm(btrpkt);
              NetworkC$wa[sim_node()] = NetworkC$m[sim_node()] * 10000;
              NetworkC$wb[sim_node()] = NetworkC$n[sim_node()] * 10000;

              NetworkC$ws1[sim_node()] = NetworkC$weishu(NetworkC$wa[sim_node()]);
              NetworkC$ws2[sim_node()] = NetworkC$weishu(NetworkC$wb[sim_node()]);
              sim_log_debug(292U, "Forward", "ws1= %d.\n", NetworkC$ws1[sim_node()]);
              sim_log_debug(293U, "Forward", "ws2= %d.\n", NetworkC$ws2[sim_node()]);
              while (NetworkC$ws1[sim_node()] == NetworkC$ws2[sim_node()] && NetworkC$wa[sim_node()] / 1000 == NetworkC$wb[sim_node()] / 1000) {
                  printf("@@@@@@@@@@@@@@@@@@@");

                  if ((__nesc_ntoh_uint16(btrpkt->n6.nxdata) == 100 && __nesc_ntoh_uint16(btrpkt->n5.nxdata) != 100 && __nesc_ntoh_uint16(btrpkt->n4.nxdata) != 100 && __nesc_ntoh_uint16(btrpkt->n3.nxdata) != 100 && __nesc_ntoh_uint16(btrpkt->n2.nxdata) != 100 && __nesc_ntoh_uint16(btrpkt->n1.nxdata) != 100) || (__nesc_ntoh_uint16(btrpkt->n6.nxdata) == 100 && NetworkC$flag5[sim_node()] != 0)) {
                      __nesc_hton_uint16(temppkt->n6.nxdata, NetworkC$wa[sim_node()] / 1000);
                      NetworkC$flag6[sim_node()] = 1;
                      sim_log_debug(294U, "Forward", "btrpkt->n1= %d.\n", __nesc_ntoh_uint16(btrpkt->n1.nxdata));
                      sim_log_debug(295U, "Forward", "btrpkt->n2= %d.\n", __nesc_ntoh_uint16(btrpkt->n2.nxdata));
                      sim_log_debug(296U, "Forward", "btrpkt->n3= %d.\n", __nesc_ntoh_uint16(btrpkt->n3.nxdata));
                      sim_log_debug(297U, "Forward", "btrpkt->n4= %d.\n", __nesc_ntoh_uint16(btrpkt->n4.nxdata));
                      sim_log_debug(298U, "Forward", "btrpkt->n5= %d.\n", __nesc_ntoh_uint16(btrpkt->n5.nxdata));
                      sim_log_debug(299U, "Forward", "btrpkt->n6= %d.\n", __nesc_ntoh_uint16(btrpkt->n6.nxdata));
                      sim_log_debug(300U, "Forward", "temppkt6= %d.\n", __nesc_ntoh_uint16(temppkt->n6.nxdata));
                    }
                  else {
#line 1553
                    if ((__nesc_ntoh_uint16(btrpkt->n5.nxdata) == 100 && __nesc_ntoh_uint16(btrpkt->n4.nxdata) != 100 && __nesc_ntoh_uint16(btrpkt->n3.nxdata) != 100 && __nesc_ntoh_uint16(btrpkt->n2.nxdata) != 100 && __nesc_ntoh_uint16(btrpkt->n1.nxdata) != 100) || (__nesc_ntoh_uint16(btrpkt->n5.nxdata) == 100 && NetworkC$flag4[sim_node()] != 0)) {
                        __nesc_hton_uint16(temppkt->n5.nxdata, NetworkC$wa[sim_node()] / 1000);
                        NetworkC$flag5[sim_node()] = 1;
                        sim_log_debug(301U, "Forward", "temppkt5= %d.\n", __nesc_ntoh_uint16(temppkt->n5.nxdata));
                      }
                    else {
#line 1558
                      if ((__nesc_ntoh_uint16(btrpkt->n4.nxdata) == 100 && __nesc_ntoh_uint16(btrpkt->n3.nxdata) != 100 && __nesc_ntoh_uint16(btrpkt->n2.nxdata) != 100 && __nesc_ntoh_uint16(btrpkt->n1.nxdata) != 100) || (__nesc_ntoh_uint16(btrpkt->n4.nxdata) == 100 && NetworkC$flag3[sim_node()] != 0)) {
                          __nesc_hton_uint16(temppkt->n4.nxdata, NetworkC$wa[sim_node()] / 1000);
                          NetworkC$flag4[sim_node()] = 1;
                          sim_log_debug(302U, "Forward", "temppkt4= %d.\n", __nesc_ntoh_uint16(temppkt->n4.nxdata));
                        }
                      else {
#line 1563
                        if ((__nesc_ntoh_uint16(btrpkt->n3.nxdata) == 100 && __nesc_ntoh_uint16(btrpkt->n2.nxdata) != 100 && __nesc_ntoh_uint16(btrpkt->n1.nxdata) != 100) || (__nesc_ntoh_uint16(btrpkt->n3.nxdata) == 100 && NetworkC$flag2[sim_node()] != 0)) {
                            __nesc_hton_uint16(temppkt->n3.nxdata, NetworkC$wa[sim_node()] / 1000);
                            NetworkC$flag3[sim_node()] = 1;
                            sim_log_debug(303U, "Forward", "temppkt3= %d.\n", __nesc_ntoh_uint16(temppkt->n3.nxdata));
                          }
                        else {
#line 1568
                          if ((__nesc_ntoh_uint16(btrpkt->n2.nxdata) == 100 && __nesc_ntoh_uint16(btrpkt->n1.nxdata) != 100) || (__nesc_ntoh_uint16(btrpkt->n2.nxdata) == 100 && NetworkC$flag1[sim_node()] != 0)) {
                              __nesc_hton_uint16(temppkt->n2.nxdata, NetworkC$wa[sim_node()] / 1000);
                              NetworkC$flag2[sim_node()] = 1;
                              sim_log_debug(304U, "Forward", "temppkt2= %d.\n", __nesc_ntoh_uint16(temppkt->n2.nxdata));
                            }
                          else {
                            if (__nesc_ntoh_uint16(btrpkt->n1.nxdata) == 100) {
                                __nesc_hton_uint16(temppkt->n1.nxdata, NetworkC$wa[sim_node()] / 1000);
                                NetworkC$flag1[sim_node()] = 1;
                                sim_log_debug(305U, "Forward", "temppkt1= %d.\n", __nesc_ntoh_uint16(temppkt->n1.nxdata));
                              }
                            }
                          }
                        }
                      }
                    }
#line 1580
                  NetworkC$wa[sim_node()] = (NetworkC$wa[sim_node()] - NetworkC$wa[sim_node()] / 1000 * 1000) * 10;
                  NetworkC$wb[sim_node()] = (NetworkC$wb[sim_node()] - NetworkC$wb[sim_node()] / 1000 * 1000) * 10;
                  sim_log_debug(306U, "Forward", "wa1= %d.\n", NetworkC$wa[sim_node()]);
                  sim_log_debug(307U, "Forward", "wb1= %d.\n", NetworkC$wb[sim_node()]);

                  NetworkC$ws1[sim_node()] = NetworkC$weishu(NetworkC$wa[sim_node()]);
                  NetworkC$ws2[sim_node()] = NetworkC$weishu(NetworkC$wb[sim_node()]);
                  NetworkC$flag[sim_node()] = 1;
                }

              NetworkC$wa2[sim_node()] = (float )NetworkC$wa[sim_node()] / 10000;
              NetworkC$wb2[sim_node()] = (float )NetworkC$wb[sim_node()] / 10000;

              sim_log_debug(308U, "Forward", "wa2= %f.\n", NetworkC$wa2[sim_node()]);
              sim_log_debug(309U, "Forward", "wb2= %f.\n", NetworkC$wb2[sim_node()]);

              __nesc_hton_uint16(temppkt->a.nxdata, (int )(NetworkC$wa2[sim_node()] * NetworkC$z[sim_node()]));
              __nesc_hton_uint16(temppkt->b.nxdata, (int )(NetworkC$wb2[sim_node()] * NetworkC$z[sim_node()]));
              if (NetworkC$flag[sim_node()] == 0) {
                  __nesc_hton_uint16(temppkt->n1.nxdata, __nesc_ntoh_uint16(btrpkt->n1.nxdata));
                  __nesc_hton_uint16(temppkt->n2.nxdata, __nesc_ntoh_uint16(btrpkt->n2.nxdata));
                  __nesc_hton_uint16(temppkt->n3.nxdata, __nesc_ntoh_uint16(btrpkt->n3.nxdata));
                  __nesc_hton_uint16(temppkt->n4.nxdata, __nesc_ntoh_uint16(btrpkt->n4.nxdata));
                  __nesc_hton_uint16(temppkt->n5.nxdata, __nesc_ntoh_uint16(btrpkt->n5.nxdata));
                  __nesc_hton_uint16(temppkt->n6.nxdata, __nesc_ntoh_uint16(btrpkt->n6.nxdata));
                }
              else 
#line 1605
                {
                  NetworkC$pdflag(&NetworkC$flag[sim_node()], &NetworkC$flag1[sim_node()], &NetworkC$flag2[sim_node()], &NetworkC$flag3[sim_node()], &NetworkC$flag4[sim_node()], &NetworkC$flag5[sim_node()], &NetworkC$flag6[sim_node()], btrpkt, temppkt);
                }
              sim_log_debug(310U, "Forward", "temppkt->n1= %d.\n", __nesc_ntoh_uint16(temppkt->n1.nxdata));
              sim_log_debug(311U, "Forward", "temppkt->n2= %d.\n", __nesc_ntoh_uint16(temppkt->n2.nxdata));
              sim_log_debug(312U, "Forward", "temppkt->n3= %d.\n", __nesc_ntoh_uint16(temppkt->n3.nxdata));
              sim_log_debug(313U, "Forward", "temppkt->n4= %d.\n", __nesc_ntoh_uint16(temppkt->n4.nxdata));
              sim_log_debug(314U, "Forward", "temppkt->n5= %d.\n", __nesc_ntoh_uint16(temppkt->n5.nxdata));
              sim_log_debug(315U, "Forward", "temppkt->n6= %d.\n", __nesc_ntoh_uint16(temppkt->n6.nxdata));

              sim_log_debug(316U, "Forward", "m7-4= %f.\n", NetworkC$m[sim_node()]);
              sim_log_debug(317U, "Forward", "n7-4= %f.\n", NetworkC$n[sim_node()]);
              sim_log_debug(318U, "Forward", "a7-4= %d.\n", __nesc_ntoh_uint16(temppkt->a.nxdata));
              sim_log_debug(319U, "Forward", "b7-4= %d.\n", __nesc_ntoh_uint16(temppkt->b.nxdata));

              __nesc_hton_uint16(temppkt->nodeid.nxdata, TOS_NODE_ID);
              __nesc_hton_uint16(temppkt->sourceid.nxdata, __nesc_ntoh_uint16(btrpkt->sourceid.nxdata));
              __nesc_hton_uint16(temppkt->count.nxdata, __nesc_ntoh_uint16(btrpkt->count.nxdata));
              if (!NetworkC$busy[sim_node()]) {
                  if (NetworkC$AMSend$send(AM_BROADCAST_ADDR, &NetworkC$pkt[sim_node()], sizeof(NetworkMsg )) == SUCCESS) {
                      NetworkC$busy[sim_node()] = TRUE;
                    }
                }
            }
          if (__nesc_ntoh_uint16(btrpkt->nodeid.nxdata) == 5) {
              NetworkMsg *temppkt = (NetworkMsg *)NetworkC$Packet$getPayload(&NetworkC$pkt[sim_node()], sizeof(NetworkMsg ));

              NetworkC$ssbm(btrpkt);

              NetworkC$wa[sim_node()] = NetworkC$m[sim_node()] * 10000;
              NetworkC$wb[sim_node()] = NetworkC$n[sim_node()] * 10000;

              NetworkC$ws1[sim_node()] = NetworkC$weishu(NetworkC$wa[sim_node()]);
              NetworkC$ws2[sim_node()] = NetworkC$weishu(NetworkC$wb[sim_node()]);
              sim_log_debug(320U, "Forward", "ws1= %d.\n", NetworkC$ws1[sim_node()]);
              sim_log_debug(321U, "Forward", "ws2= %d.\n", NetworkC$ws2[sim_node()]);
              while (NetworkC$ws1[sim_node()] == NetworkC$ws2[sim_node()] && NetworkC$wa[sim_node()] / 1000 == NetworkC$wb[sim_node()] / 1000) {
                  printf("@@@@@@@@@@@@@@@@@@@");

                  if ((__nesc_ntoh_uint16(btrpkt->n6.nxdata) == 100 && __nesc_ntoh_uint16(btrpkt->n5.nxdata) != 100 && __nesc_ntoh_uint16(btrpkt->n4.nxdata) != 100 && __nesc_ntoh_uint16(btrpkt->n3.nxdata) != 100 && __nesc_ntoh_uint16(btrpkt->n2.nxdata) != 100 && __nesc_ntoh_uint16(btrpkt->n1.nxdata) != 100) || (__nesc_ntoh_uint16(btrpkt->n6.nxdata) == 100 && NetworkC$flag5[sim_node()] != 0)) {
                      __nesc_hton_uint16(temppkt->n6.nxdata, NetworkC$wa[sim_node()] / 1000);
                      NetworkC$flag6[sim_node()] = 1;
                      sim_log_debug(322U, "Forward", "btrpkt->n1= %d.\n", __nesc_ntoh_uint16(btrpkt->n1.nxdata));
                      sim_log_debug(323U, "Forward", "btrpkt->n2= %d.\n", __nesc_ntoh_uint16(btrpkt->n2.nxdata));
                      sim_log_debug(324U, "Forward", "btrpkt->n3= %d.\n", __nesc_ntoh_uint16(btrpkt->n3.nxdata));
                      sim_log_debug(325U, "Forward", "btrpkt->n4= %d.\n", __nesc_ntoh_uint16(btrpkt->n4.nxdata));
                      sim_log_debug(326U, "Forward", "btrpkt->n5= %d.\n", __nesc_ntoh_uint16(btrpkt->n5.nxdata));
                      sim_log_debug(327U, "Forward", "btrpkt->n6= %d.\n", __nesc_ntoh_uint16(btrpkt->n6.nxdata));
                      sim_log_debug(328U, "Forward", "temppkt6= %d.\n", __nesc_ntoh_uint16(temppkt->n6.nxdata));
                    }
                  else {
#line 1655
                    if ((__nesc_ntoh_uint16(btrpkt->n5.nxdata) == 100 && __nesc_ntoh_uint16(btrpkt->n4.nxdata) != 100 && __nesc_ntoh_uint16(btrpkt->n3.nxdata) != 100 && __nesc_ntoh_uint16(btrpkt->n2.nxdata) != 100 && __nesc_ntoh_uint16(btrpkt->n1.nxdata) != 100) || (__nesc_ntoh_uint16(btrpkt->n5.nxdata) == 100 && NetworkC$flag4[sim_node()] != 0)) {
                        __nesc_hton_uint16(temppkt->n5.nxdata, NetworkC$wa[sim_node()] / 1000);
                        NetworkC$flag5[sim_node()] = 1;
                        sim_log_debug(329U, "Forward", "temppkt5= %d.\n", __nesc_ntoh_uint16(temppkt->n5.nxdata));
                      }
                    else {
#line 1660
                      if ((__nesc_ntoh_uint16(btrpkt->n4.nxdata) == 100 && __nesc_ntoh_uint16(btrpkt->n3.nxdata) != 100 && __nesc_ntoh_uint16(btrpkt->n2.nxdata) != 100 && __nesc_ntoh_uint16(btrpkt->n1.nxdata) != 100) || (__nesc_ntoh_uint16(btrpkt->n4.nxdata) == 100 && NetworkC$flag3[sim_node()] != 0)) {
                          __nesc_hton_uint16(temppkt->n4.nxdata, NetworkC$wa[sim_node()] / 1000);
                          NetworkC$flag4[sim_node()] = 1;
                          sim_log_debug(330U, "Forward", "temppkt4= %d.\n", __nesc_ntoh_uint16(temppkt->n4.nxdata));
                        }
                      else {
#line 1665
                        if ((__nesc_ntoh_uint16(btrpkt->n3.nxdata) == 100 && __nesc_ntoh_uint16(btrpkt->n2.nxdata) != 100 && __nesc_ntoh_uint16(btrpkt->n1.nxdata) != 100) || (__nesc_ntoh_uint16(btrpkt->n3.nxdata) == 100 && NetworkC$flag2[sim_node()] != 0)) {
                            __nesc_hton_uint16(temppkt->n3.nxdata, NetworkC$wa[sim_node()] / 1000);
                            NetworkC$flag3[sim_node()] = 1;
                            sim_log_debug(331U, "Forward", "temppkt3= %d.\n", __nesc_ntoh_uint16(temppkt->n3.nxdata));
                          }
                        else {
#line 1670
                          if ((__nesc_ntoh_uint16(btrpkt->n2.nxdata) == 100 && __nesc_ntoh_uint16(btrpkt->n1.nxdata) != 100) || (__nesc_ntoh_uint16(btrpkt->n2.nxdata) == 100 && NetworkC$flag1[sim_node()] != 0)) {
                              __nesc_hton_uint16(temppkt->n2.nxdata, NetworkC$wa[sim_node()] / 1000);
                              NetworkC$flag2[sim_node()] = 1;
                              sim_log_debug(332U, "Forward", "temppkt2= %d.\n", __nesc_ntoh_uint16(temppkt->n2.nxdata));
                            }
                          else {
                            if (__nesc_ntoh_uint16(btrpkt->n1.nxdata) == 100) {
                                __nesc_hton_uint16(temppkt->n1.nxdata, NetworkC$wa[sim_node()] / 1000);
                                NetworkC$flag1[sim_node()] = 1;
                                sim_log_debug(333U, "Forward", "temppkt1= %d.\n", __nesc_ntoh_uint16(temppkt->n1.nxdata));
                              }
                            }
                          }
                        }
                      }
                    }
#line 1682
                  NetworkC$wa[sim_node()] = (NetworkC$wa[sim_node()] - NetworkC$wa[sim_node()] / 1000 * 1000) * 10;
                  NetworkC$wb[sim_node()] = (NetworkC$wb[sim_node()] - NetworkC$wb[sim_node()] / 1000 * 1000) * 10;
                  sim_log_debug(334U, "Forward", "wa1= %d.\n", NetworkC$wa[sim_node()]);
                  sim_log_debug(335U, "Forward", "wb1= %d.\n", NetworkC$wb[sim_node()]);

                  NetworkC$ws1[sim_node()] = NetworkC$weishu(NetworkC$wa[sim_node()]);
                  NetworkC$ws2[sim_node()] = NetworkC$weishu(NetworkC$wb[sim_node()]);
                  NetworkC$flag[sim_node()] = 1;
                }

              NetworkC$wa2[sim_node()] = (float )NetworkC$wa[sim_node()] / 10000;
              NetworkC$wb2[sim_node()] = (float )NetworkC$wb[sim_node()] / 10000;

              sim_log_debug(336U, "Forward", "wa2= %f.\n", NetworkC$wa2[sim_node()]);
              sim_log_debug(337U, "Forward", "wb2= %f.\n", NetworkC$wb2[sim_node()]);

              __nesc_hton_uint16(temppkt->a.nxdata, (int )(NetworkC$wa2[sim_node()] * NetworkC$z[sim_node()]));
              __nesc_hton_uint16(temppkt->b.nxdata, (int )(NetworkC$wb2[sim_node()] * NetworkC$z[sim_node()]));
              if (NetworkC$flag[sim_node()] == 0) {
                  __nesc_hton_uint16(temppkt->n1.nxdata, __nesc_ntoh_uint16(btrpkt->n1.nxdata));
                  __nesc_hton_uint16(temppkt->n2.nxdata, __nesc_ntoh_uint16(btrpkt->n2.nxdata));
                  __nesc_hton_uint16(temppkt->n3.nxdata, __nesc_ntoh_uint16(btrpkt->n3.nxdata));
                  __nesc_hton_uint16(temppkt->n4.nxdata, __nesc_ntoh_uint16(btrpkt->n4.nxdata));
                  __nesc_hton_uint16(temppkt->n5.nxdata, __nesc_ntoh_uint16(btrpkt->n5.nxdata));
                  __nesc_hton_uint16(temppkt->n6.nxdata, __nesc_ntoh_uint16(btrpkt->n6.nxdata));
                }
              else 
#line 1707
                {
                  NetworkC$pdflag(&NetworkC$flag[sim_node()], &NetworkC$flag1[sim_node()], &NetworkC$flag2[sim_node()], &NetworkC$flag3[sim_node()], &NetworkC$flag4[sim_node()], &NetworkC$flag5[sim_node()], &NetworkC$flag6[sim_node()], btrpkt, temppkt);
                }
              sim_log_debug(338U, "Forward", "temppkt->n1= %d.\n", __nesc_ntoh_uint16(temppkt->n1.nxdata));
              sim_log_debug(339U, "Forward", "temppkt->n2= %d.\n", __nesc_ntoh_uint16(temppkt->n2.nxdata));
              sim_log_debug(340U, "Forward", "temppkt->n3= %d.\n", __nesc_ntoh_uint16(temppkt->n3.nxdata));
              sim_log_debug(341U, "Forward", "temppkt->n4= %d.\n", __nesc_ntoh_uint16(temppkt->n4.nxdata));
              sim_log_debug(342U, "Forward", "temppkt->n5= %d.\n", __nesc_ntoh_uint16(temppkt->n5.nxdata));
              sim_log_debug(343U, "Forward", "temppkt->n6= %d.\n", __nesc_ntoh_uint16(temppkt->n6.nxdata));

              sim_log_debug(344U, "Forward", "m5-4= %f.\n", NetworkC$m[sim_node()]);
              sim_log_debug(345U, "Forward", "n5-4= %f.\n", NetworkC$n[sim_node()]);
              sim_log_debug(346U, "Forward", "a5-4= %d.\n", __nesc_ntoh_uint16(temppkt->a.nxdata));
              sim_log_debug(347U, "Forward", "b5-4= %d.\n", __nesc_ntoh_uint16(temppkt->b.nxdata));

              __nesc_hton_uint16(temppkt->nodeid.nxdata, TOS_NODE_ID);
              __nesc_hton_uint16(temppkt->sourceid.nxdata, __nesc_ntoh_uint16(btrpkt->sourceid.nxdata));
              __nesc_hton_uint16(temppkt->count.nxdata, __nesc_ntoh_uint16(btrpkt->count.nxdata));

              if (!NetworkC$busy[sim_node()]) {
                  if (NetworkC$AMSend$send(AM_BROADCAST_ADDR, &NetworkC$pkt[sim_node()], sizeof(NetworkMsg )) == SUCCESS) {
                      NetworkC$busy[sim_node()] = TRUE;
                    }
                }
            }
        }

      if (TOS_NODE_ID == 3 && __nesc_ntoh_uint16(btrpkt->nodeid.nxdata) == 7) {
          NetworkMsg *temppkt = (NetworkMsg *)NetworkC$Packet$getPayload(&NetworkC$pkt[sim_node()], sizeof(NetworkMsg ));

#line 1736
          sim_log_debug(348U, "Forward", "r73= %d.\n", NetworkC$r73[sim_node()]);
          NetworkC$ssbm(btrpkt);
          NetworkC$wa[sim_node()] = NetworkC$m[sim_node()] * 10000;
          NetworkC$wb[sim_node()] = NetworkC$n[sim_node()] * 10000;

          NetworkC$ws1[sim_node()] = NetworkC$weishu(NetworkC$wa[sim_node()]);
          NetworkC$ws2[sim_node()] = NetworkC$weishu(NetworkC$wb[sim_node()]);
          sim_log_debug(349U, "Forward", "ws1= %d.\n", NetworkC$ws1[sim_node()]);
          sim_log_debug(350U, "Forward", "ws2= %d.\n", NetworkC$ws2[sim_node()]);
          while (NetworkC$ws1[sim_node()] == NetworkC$ws2[sim_node()] && NetworkC$wa[sim_node()] / 1000 == NetworkC$wb[sim_node()] / 1000) {
              printf("@@@@@@@@@@@@@@@@@@@");

              if ((__nesc_ntoh_uint16(btrpkt->n6.nxdata) == 100 && __nesc_ntoh_uint16(btrpkt->n5.nxdata) != 100 && __nesc_ntoh_uint16(btrpkt->n4.nxdata) != 100 && __nesc_ntoh_uint16(btrpkt->n3.nxdata) != 100 && __nesc_ntoh_uint16(btrpkt->n2.nxdata) != 100 && __nesc_ntoh_uint16(btrpkt->n1.nxdata) != 100) || (__nesc_ntoh_uint16(btrpkt->n6.nxdata) == 100 && NetworkC$flag5[sim_node()] != 0)) {
                  __nesc_hton_uint16(temppkt->n6.nxdata, NetworkC$wa[sim_node()] / 1000);
                  NetworkC$flag6[sim_node()] = 1;
                  sim_log_debug(351U, "Forward", "btrpkt->n1= %d.\n", __nesc_ntoh_uint16(btrpkt->n1.nxdata));
                  sim_log_debug(352U, "Forward", "btrpkt->n2= %d.\n", __nesc_ntoh_uint16(btrpkt->n2.nxdata));
                  sim_log_debug(353U, "Forward", "btrpkt->n3= %d.\n", __nesc_ntoh_uint16(btrpkt->n3.nxdata));
                  sim_log_debug(354U, "Forward", "btrpkt->n4= %d.\n", __nesc_ntoh_uint16(btrpkt->n4.nxdata));
                  sim_log_debug(355U, "Forward", "btrpkt->n5= %d.\n", __nesc_ntoh_uint16(btrpkt->n5.nxdata));
                  sim_log_debug(356U, "Forward", "btrpkt->n6= %d.\n", __nesc_ntoh_uint16(btrpkt->n6.nxdata));
                  sim_log_debug(357U, "Forward", "temppkt6= %d.\n", __nesc_ntoh_uint16(temppkt->n6.nxdata));
                }
              else {
#line 1759
                if ((__nesc_ntoh_uint16(btrpkt->n5.nxdata) == 100 && __nesc_ntoh_uint16(btrpkt->n4.nxdata) != 100 && __nesc_ntoh_uint16(btrpkt->n3.nxdata) != 100 && __nesc_ntoh_uint16(btrpkt->n2.nxdata) != 100 && __nesc_ntoh_uint16(btrpkt->n1.nxdata) != 100) || (__nesc_ntoh_uint16(btrpkt->n5.nxdata) == 100 && NetworkC$flag4[sim_node()] != 0)) {
                    __nesc_hton_uint16(temppkt->n5.nxdata, NetworkC$wa[sim_node()] / 1000);
                    NetworkC$flag5[sim_node()] = 1;
                    sim_log_debug(358U, "Forward", "temppkt5= %d.\n", __nesc_ntoh_uint16(temppkt->n5.nxdata));
                  }
                else {
#line 1764
                  if ((__nesc_ntoh_uint16(btrpkt->n4.nxdata) == 100 && __nesc_ntoh_uint16(btrpkt->n3.nxdata) != 100 && __nesc_ntoh_uint16(btrpkt->n2.nxdata) != 100 && __nesc_ntoh_uint16(btrpkt->n1.nxdata) != 100) || (__nesc_ntoh_uint16(btrpkt->n4.nxdata) == 100 && NetworkC$flag3[sim_node()] != 0)) {
                      __nesc_hton_uint16(temppkt->n4.nxdata, NetworkC$wa[sim_node()] / 1000);
                      NetworkC$flag4[sim_node()] = 1;
                      sim_log_debug(359U, "Forward", "temppkt4= %d.\n", __nesc_ntoh_uint16(temppkt->n4.nxdata));
                    }
                  else {
#line 1769
                    if ((__nesc_ntoh_uint16(btrpkt->n3.nxdata) == 100 && __nesc_ntoh_uint16(btrpkt->n2.nxdata) != 100 && __nesc_ntoh_uint16(btrpkt->n1.nxdata) != 100) || (__nesc_ntoh_uint16(btrpkt->n3.nxdata) == 100 && NetworkC$flag2[sim_node()] != 0)) {
                        __nesc_hton_uint16(temppkt->n3.nxdata, NetworkC$wa[sim_node()] / 1000);
                        NetworkC$flag3[sim_node()] = 1;
                        sim_log_debug(360U, "Forward", "temppkt3= %d.\n", __nesc_ntoh_uint16(temppkt->n3.nxdata));
                      }
                    else {
#line 1774
                      if ((__nesc_ntoh_uint16(btrpkt->n2.nxdata) == 100 && __nesc_ntoh_uint16(btrpkt->n1.nxdata) != 100) || (__nesc_ntoh_uint16(btrpkt->n2.nxdata) == 100 && NetworkC$flag1[sim_node()] != 0)) {
                          __nesc_hton_uint16(temppkt->n2.nxdata, NetworkC$wa[sim_node()] / 1000);
                          NetworkC$flag2[sim_node()] = 1;
                          sim_log_debug(361U, "Forward", "temppkt2= %d.\n", __nesc_ntoh_uint16(temppkt->n2.nxdata));
                        }
                      else {
                        if (__nesc_ntoh_uint16(btrpkt->n1.nxdata) == 100) {
                            __nesc_hton_uint16(temppkt->n1.nxdata, NetworkC$wa[sim_node()] / 1000);
                            NetworkC$flag1[sim_node()] = 1;
                            sim_log_debug(362U, "Forward", "temppkt1= %d.\n", __nesc_ntoh_uint16(temppkt->n1.nxdata));
                          }
                        }
                      }
                    }
                  }
                }
#line 1786
              NetworkC$wa[sim_node()] = (NetworkC$wa[sim_node()] - NetworkC$wa[sim_node()] / 1000 * 1000) * 10;
              NetworkC$wb[sim_node()] = (NetworkC$wb[sim_node()] - NetworkC$wb[sim_node()] / 1000 * 1000) * 10;
              sim_log_debug(363U, "Forward", "wa1= %d.\n", NetworkC$wa[sim_node()]);
              sim_log_debug(364U, "Forward", "wb1= %d.\n", NetworkC$wb[sim_node()]);

              NetworkC$ws1[sim_node()] = NetworkC$weishu(NetworkC$wa[sim_node()]);
              NetworkC$ws2[sim_node()] = NetworkC$weishu(NetworkC$wb[sim_node()]);
              NetworkC$flag[sim_node()] = 1;
            }

          NetworkC$wa2[sim_node()] = (float )NetworkC$wa[sim_node()] / 10000;
          NetworkC$wb2[sim_node()] = (float )NetworkC$wb[sim_node()] / 10000;

          sim_log_debug(365U, "Forward", "wa2= %f.\n", NetworkC$wa2[sim_node()]);
          sim_log_debug(366U, "Forward", "wb2= %f.\n", NetworkC$wb2[sim_node()]);

          __nesc_hton_uint16(temppkt->a.nxdata, (int )(NetworkC$wa2[sim_node()] * NetworkC$z[sim_node()]));
          __nesc_hton_uint16(temppkt->b.nxdata, (int )(NetworkC$wb2[sim_node()] * NetworkC$z[sim_node()]));
          if (NetworkC$flag[sim_node()] == 0) {
              __nesc_hton_uint16(temppkt->n1.nxdata, __nesc_ntoh_uint16(btrpkt->n1.nxdata));
              __nesc_hton_uint16(temppkt->n2.nxdata, __nesc_ntoh_uint16(btrpkt->n2.nxdata));
              __nesc_hton_uint16(temppkt->n3.nxdata, __nesc_ntoh_uint16(btrpkt->n3.nxdata));
              __nesc_hton_uint16(temppkt->n4.nxdata, __nesc_ntoh_uint16(btrpkt->n4.nxdata));
              __nesc_hton_uint16(temppkt->n5.nxdata, __nesc_ntoh_uint16(btrpkt->n5.nxdata));
              __nesc_hton_uint16(temppkt->n6.nxdata, __nesc_ntoh_uint16(btrpkt->n6.nxdata));
            }
          else 
#line 1811
            {
              NetworkC$pdflag(&NetworkC$flag[sim_node()], &NetworkC$flag1[sim_node()], &NetworkC$flag2[sim_node()], &NetworkC$flag3[sim_node()], &NetworkC$flag4[sim_node()], &NetworkC$flag5[sim_node()], &NetworkC$flag6[sim_node()], btrpkt, temppkt);
            }
          sim_log_debug(367U, "Forward", "temppkt->n1= %d.\n", __nesc_ntoh_uint16(temppkt->n1.nxdata));
          sim_log_debug(368U, "Forward", "temppkt->n2= %d.\n", __nesc_ntoh_uint16(temppkt->n2.nxdata));
          sim_log_debug(369U, "Forward", "temppkt->n3= %d.\n", __nesc_ntoh_uint16(temppkt->n3.nxdata));
          sim_log_debug(370U, "Forward", "temppkt->n4= %d.\n", __nesc_ntoh_uint16(temppkt->n4.nxdata));
          sim_log_debug(371U, "Forward", "temppkt->n5= %d.\n", __nesc_ntoh_uint16(temppkt->n5.nxdata));
          sim_log_debug(372U, "Forward", "temppkt->n6= %d.\n", __nesc_ntoh_uint16(temppkt->n6.nxdata));

          sim_log_debug(373U, "Forward", "m7-3= %f.\n", NetworkC$m[sim_node()]);
          sim_log_debug(374U, "Forward", "n7-3= %f.\n", NetworkC$n[sim_node()]);
          sim_log_debug(375U, "Forward", "a7-3= %d.\n", __nesc_ntoh_uint16(temppkt->a.nxdata));
          sim_log_debug(376U, "Forward", "b7-3= %d.\n", __nesc_ntoh_uint16(temppkt->b.nxdata));

          __nesc_hton_uint16(temppkt->nodeid.nxdata, TOS_NODE_ID);
          __nesc_hton_uint16(temppkt->sourceid.nxdata, __nesc_ntoh_uint16(btrpkt->sourceid.nxdata));
          __nesc_hton_uint16(temppkt->count.nxdata, __nesc_ntoh_uint16(btrpkt->count.nxdata));
          if (!NetworkC$busy[sim_node()]) {
              if (NetworkC$AMSend$send(AM_BROADCAST_ADDR, &NetworkC$pkt[sim_node()], sizeof(NetworkMsg )) == SUCCESS) {
                  NetworkC$busy[sim_node()] = TRUE;
                }
            }
        }
      if (TOS_NODE_ID == 1) {
          sim_log_debug(377U, "Forward", "r341= %d.\n", NetworkC$r341[sim_node()]);
          sim_log_debug(378U, "Forward", "r31= %d.\n", NetworkC$r31[sim_node()]);
          sim_log_debug(379U, "Forward", "r41= %d.\n", NetworkC$r41[sim_node()]);
          sim_log_debug(380U, "Forward", "s1[0]= %f.\n", NetworkC$s1[sim_node()][0]);
          sim_log_debug(381U, "Forward", "s1[1]= %f.\n", NetworkC$s1[sim_node()][1]);
          sim_log_debug(382U, "Forward", "s1[2]= %f.\n", NetworkC$s1[sim_node()][2]);
          sim_log_debug(383U, "Forward", "s1[3]= %f.\n", NetworkC$s1[sim_node()][3]);

          if (__nesc_ntoh_uint16(btrpkt->nodeid.nxdata) == 4) {
              NetworkMsg *temppkt = (NetworkMsg *)NetworkC$Packet$getPayload(&NetworkC$pkt[sim_node()], sizeof(NetworkMsg ));

              NetworkC$ssbm(btrpkt);

              NetworkC$wa[sim_node()] = NetworkC$m[sim_node()] * 10000;
              NetworkC$wb[sim_node()] = NetworkC$n[sim_node()] * 10000;

              NetworkC$ws1[sim_node()] = NetworkC$weishu(NetworkC$wa[sim_node()]);
              NetworkC$ws2[sim_node()] = NetworkC$weishu(NetworkC$wb[sim_node()]);
              sim_log_debug(384U, "Forward", "ws1= %d.\n", NetworkC$ws1[sim_node()]);
              sim_log_debug(385U, "Forward", "ws2= %d.\n", NetworkC$ws2[sim_node()]);
              while (NetworkC$ws1[sim_node()] == NetworkC$ws2[sim_node()] && NetworkC$wa[sim_node()] / 1000 == NetworkC$wb[sim_node()] / 1000) {
                  printf("@@@@@@@@@@@@@@@@@@@");

                  if ((__nesc_ntoh_uint16(btrpkt->n6.nxdata) == 100 && __nesc_ntoh_uint16(btrpkt->n5.nxdata) != 100 && __nesc_ntoh_uint16(btrpkt->n4.nxdata) != 100 && __nesc_ntoh_uint16(btrpkt->n3.nxdata) != 100 && __nesc_ntoh_uint16(btrpkt->n2.nxdata) != 100 && __nesc_ntoh_uint16(btrpkt->n1.nxdata) != 100) || (__nesc_ntoh_uint16(btrpkt->n6.nxdata) == 100 && NetworkC$flag5[sim_node()] != 0)) {
                      __nesc_hton_uint16(temppkt->n6.nxdata, NetworkC$wa[sim_node()] / 1000);
                      NetworkC$flag6[sim_node()] = 1;
                      sim_log_debug(386U, "Forward", "btrpkt->n1= %d.\n", __nesc_ntoh_uint16(btrpkt->n1.nxdata));
                      sim_log_debug(387U, "Forward", "btrpkt->n2= %d.\n", __nesc_ntoh_uint16(btrpkt->n2.nxdata));
                      sim_log_debug(388U, "Forward", "btrpkt->n3= %d.\n", __nesc_ntoh_uint16(btrpkt->n3.nxdata));
                      sim_log_debug(389U, "Forward", "btrpkt->n4= %d.\n", __nesc_ntoh_uint16(btrpkt->n4.nxdata));
                      sim_log_debug(390U, "Forward", "btrpkt->n5= %d.\n", __nesc_ntoh_uint16(btrpkt->n5.nxdata));
                      sim_log_debug(391U, "Forward", "btrpkt->n6= %d.\n", __nesc_ntoh_uint16(btrpkt->n6.nxdata));
                      sim_log_debug(392U, "Forward", "temppkt6= %d.\n", __nesc_ntoh_uint16(temppkt->n6.nxdata));
                    }
                  else {
#line 1870
                    if ((__nesc_ntoh_uint16(btrpkt->n5.nxdata) == 100 && __nesc_ntoh_uint16(btrpkt->n4.nxdata) != 100 && __nesc_ntoh_uint16(btrpkt->n3.nxdata) != 100 && __nesc_ntoh_uint16(btrpkt->n2.nxdata) != 100 && __nesc_ntoh_uint16(btrpkt->n1.nxdata) != 100) || (__nesc_ntoh_uint16(btrpkt->n5.nxdata) == 100 && NetworkC$flag4[sim_node()] != 0)) {
                        __nesc_hton_uint16(temppkt->n5.nxdata, NetworkC$wa[sim_node()] / 1000);
                        NetworkC$flag5[sim_node()] = 1;
                        sim_log_debug(393U, "Forward", "temppkt5= %d.\n", __nesc_ntoh_uint16(temppkt->n5.nxdata));
                      }
                    else {
#line 1875
                      if ((__nesc_ntoh_uint16(btrpkt->n4.nxdata) == 100 && __nesc_ntoh_uint16(btrpkt->n3.nxdata) != 100 && __nesc_ntoh_uint16(btrpkt->n2.nxdata) != 100 && __nesc_ntoh_uint16(btrpkt->n1.nxdata) != 100) || (__nesc_ntoh_uint16(btrpkt->n4.nxdata) == 100 && NetworkC$flag3[sim_node()] != 0)) {
                          __nesc_hton_uint16(temppkt->n4.nxdata, NetworkC$wa[sim_node()] / 1000);
                          NetworkC$flag4[sim_node()] = 1;
                          sim_log_debug(394U, "Forward", "temppkt4= %d.\n", __nesc_ntoh_uint16(temppkt->n4.nxdata));
                        }
                      else {
#line 1880
                        if ((__nesc_ntoh_uint16(btrpkt->n3.nxdata) == 100 && __nesc_ntoh_uint16(btrpkt->n2.nxdata) != 100 && __nesc_ntoh_uint16(btrpkt->n1.nxdata) != 100) || (__nesc_ntoh_uint16(btrpkt->n3.nxdata) == 100 && NetworkC$flag2[sim_node()] != 0)) {
                            __nesc_hton_uint16(temppkt->n3.nxdata, NetworkC$wa[sim_node()] / 1000);
                            NetworkC$flag3[sim_node()] = 1;
                            sim_log_debug(395U, "Forward", "temppkt3= %d.\n", __nesc_ntoh_uint16(temppkt->n3.nxdata));
                          }
                        else {
#line 1885
                          if ((__nesc_ntoh_uint16(btrpkt->n2.nxdata) == 100 && __nesc_ntoh_uint16(btrpkt->n1.nxdata) != 100) || (__nesc_ntoh_uint16(btrpkt->n2.nxdata) == 100 && NetworkC$flag1[sim_node()] != 0)) {
                              __nesc_hton_uint16(temppkt->n2.nxdata, NetworkC$wa[sim_node()] / 1000);
                              NetworkC$flag2[sim_node()] = 1;
                              sim_log_debug(396U, "Forward", "temppkt2= %d.\n", __nesc_ntoh_uint16(temppkt->n2.nxdata));
                            }
                          else {
                            if (__nesc_ntoh_uint16(btrpkt->n1.nxdata) == 100) {
                                __nesc_hton_uint16(temppkt->n1.nxdata, NetworkC$wa[sim_node()] / 1000);
                                NetworkC$flag1[sim_node()] = 1;
                                sim_log_debug(397U, "Forward", "temppkt1= %d.\n", __nesc_ntoh_uint16(temppkt->n1.nxdata));
                              }
                            }
                          }
                        }
                      }
                    }
#line 1897
                  NetworkC$wa[sim_node()] = (NetworkC$wa[sim_node()] - NetworkC$wa[sim_node()] / 1000 * 1000) * 10;
                  NetworkC$wb[sim_node()] = (NetworkC$wb[sim_node()] - NetworkC$wb[sim_node()] / 1000 * 1000) * 10;
                  sim_log_debug(398U, "Forward", "wa1= %d.\n", NetworkC$wa[sim_node()]);
                  sim_log_debug(399U, "Forward", "wb1= %d.\n", NetworkC$wb[sim_node()]);

                  NetworkC$ws1[sim_node()] = NetworkC$weishu(NetworkC$wa[sim_node()]);
                  NetworkC$ws2[sim_node()] = NetworkC$weishu(NetworkC$wb[sim_node()]);
                  NetworkC$flag[sim_node()] = 1;
                }

              NetworkC$wa2[sim_node()] = (float )NetworkC$wa[sim_node()] / 10000;
              NetworkC$wb2[sim_node()] = (float )NetworkC$wb[sim_node()] / 10000;

              sim_log_debug(400U, "Forward", "wa2= %f.\n", NetworkC$wa2[sim_node()]);
              sim_log_debug(401U, "Forward", "wb2= %f.\n", NetworkC$wb2[sim_node()]);

              __nesc_hton_uint16(temppkt->a.nxdata, (int )(NetworkC$wa2[sim_node()] * NetworkC$z[sim_node()]));
              __nesc_hton_uint16(temppkt->b.nxdata, (int )(NetworkC$wb2[sim_node()] * NetworkC$z[sim_node()]));
              if (NetworkC$flag[sim_node()] == 0) {
                  __nesc_hton_uint16(temppkt->n1.nxdata, __nesc_ntoh_uint16(btrpkt->n1.nxdata));
                  __nesc_hton_uint16(temppkt->n2.nxdata, __nesc_ntoh_uint16(btrpkt->n2.nxdata));
                  __nesc_hton_uint16(temppkt->n3.nxdata, __nesc_ntoh_uint16(btrpkt->n3.nxdata));
                  __nesc_hton_uint16(temppkt->n4.nxdata, __nesc_ntoh_uint16(btrpkt->n4.nxdata));
                  __nesc_hton_uint16(temppkt->n5.nxdata, __nesc_ntoh_uint16(btrpkt->n5.nxdata));
                  __nesc_hton_uint16(temppkt->n6.nxdata, __nesc_ntoh_uint16(btrpkt->n6.nxdata));
                }
              else 
#line 1922
                {
                  NetworkC$pdflag(&NetworkC$flag[sim_node()], &NetworkC$flag1[sim_node()], &NetworkC$flag2[sim_node()], &NetworkC$flag3[sim_node()], &NetworkC$flag4[sim_node()], &NetworkC$flag5[sim_node()], &NetworkC$flag6[sim_node()], btrpkt, temppkt);
                }
              sim_log_debug(402U, "Forward", "temppkt->n1= %d.\n", __nesc_ntoh_uint16(temppkt->n1.nxdata));
              sim_log_debug(403U, "Forward", "temppkt->n2= %d.\n", __nesc_ntoh_uint16(temppkt->n2.nxdata));
              sim_log_debug(404U, "Forward", "temppkt->n3= %d.\n", __nesc_ntoh_uint16(temppkt->n3.nxdata));
              sim_log_debug(405U, "Forward", "temppkt->n4= %d.\n", __nesc_ntoh_uint16(temppkt->n4.nxdata));
              sim_log_debug(406U, "Forward", "temppkt->n5= %d.\n", __nesc_ntoh_uint16(temppkt->n5.nxdata));
              sim_log_debug(407U, "Forward", "temppkt->n6= %d.\n", __nesc_ntoh_uint16(temppkt->n6.nxdata));

              sim_log_debug(408U, "Forward", "m4-1= %f.\n", NetworkC$m[sim_node()]);
              sim_log_debug(409U, "Forward", "n4-1= %f.\n", NetworkC$n[sim_node()]);
              sim_log_debug(410U, "Forward", "a4-1= %d.\n", __nesc_ntoh_uint16(temppkt->a.nxdata));
              sim_log_debug(411U, "Forward", "b4-1= %d.\n", __nesc_ntoh_uint16(temppkt->b.nxdata));

              __nesc_hton_uint16(temppkt->nodeid.nxdata, TOS_NODE_ID);
              __nesc_hton_uint16(temppkt->sourceid.nxdata, __nesc_ntoh_uint16(btrpkt->sourceid.nxdata));
              __nesc_hton_uint16(temppkt->count.nxdata, __nesc_ntoh_uint16(btrpkt->count.nxdata));
              if (!NetworkC$busy[sim_node()]) {
                  if (NetworkC$AMSend$send(AM_BROADCAST_ADDR, &NetworkC$pkt[sim_node()], sizeof(NetworkMsg )) == SUCCESS) {
                      NetworkC$busy[sim_node()] = TRUE;
                    }
                }
            }


          if (__nesc_ntoh_uint16(btrpkt->nodeid.nxdata) == 3) {
              NetworkMsg *temppkt = (NetworkMsg *)NetworkC$Packet$getPayload(&NetworkC$pkt[sim_node()], sizeof(NetworkMsg ));

              NetworkC$ssbm(btrpkt);
              NetworkC$wa[sim_node()] = NetworkC$m[sim_node()] * 10000;
              NetworkC$wb[sim_node()] = NetworkC$n[sim_node()] * 10000;

              NetworkC$ws1[sim_node()] = NetworkC$weishu(NetworkC$wa[sim_node()]);
              NetworkC$ws2[sim_node()] = NetworkC$weishu(NetworkC$wb[sim_node()]);
              sim_log_debug(412U, "Forward", "ws1= %d.\n", NetworkC$ws1[sim_node()]);
              sim_log_debug(413U, "Forward", "ws2= %d.\n", NetworkC$ws2[sim_node()]);
              while (NetworkC$ws1[sim_node()] == NetworkC$ws2[sim_node()] && NetworkC$wa[sim_node()] / 1000 == NetworkC$wb[sim_node()] / 1000) {
                  printf("@@@@@@@@@@@@@@@@@@@");

                  if ((__nesc_ntoh_uint16(btrpkt->n6.nxdata) == 100 && __nesc_ntoh_uint16(btrpkt->n5.nxdata) != 100 && __nesc_ntoh_uint16(btrpkt->n4.nxdata) != 100 && __nesc_ntoh_uint16(btrpkt->n3.nxdata) != 100 && __nesc_ntoh_uint16(btrpkt->n2.nxdata) != 100 && __nesc_ntoh_uint16(btrpkt->n1.nxdata) != 100) || (__nesc_ntoh_uint16(btrpkt->n6.nxdata) == 100 && NetworkC$flag5[sim_node()] != 0)) {
                      __nesc_hton_uint16(temppkt->n6.nxdata, NetworkC$wa[sim_node()] / 1000);
                      NetworkC$flag6[sim_node()] = 1;
                      sim_log_debug(414U, "Forward", "btrpkt->n1= %d.\n", __nesc_ntoh_uint16(btrpkt->n1.nxdata));
                      sim_log_debug(415U, "Forward", "btrpkt->n2= %d.\n", __nesc_ntoh_uint16(btrpkt->n2.nxdata));
                      sim_log_debug(416U, "Forward", "btrpkt->n3= %d.\n", __nesc_ntoh_uint16(btrpkt->n3.nxdata));
                      sim_log_debug(417U, "Forward", "btrpkt->n4= %d.\n", __nesc_ntoh_uint16(btrpkt->n4.nxdata));
                      sim_log_debug(418U, "Forward", "btrpkt->n5= %d.\n", __nesc_ntoh_uint16(btrpkt->n5.nxdata));
                      sim_log_debug(419U, "Forward", "btrpkt->n6= %d.\n", __nesc_ntoh_uint16(btrpkt->n6.nxdata));
                      sim_log_debug(420U, "Forward", "temppkt6= %d.\n", __nesc_ntoh_uint16(temppkt->n6.nxdata));
                    }
                  else {
#line 1973
                    if ((__nesc_ntoh_uint16(btrpkt->n5.nxdata) == 100 && __nesc_ntoh_uint16(btrpkt->n4.nxdata) != 100 && __nesc_ntoh_uint16(btrpkt->n3.nxdata) != 100 && __nesc_ntoh_uint16(btrpkt->n2.nxdata) != 100 && __nesc_ntoh_uint16(btrpkt->n1.nxdata) != 100) || (__nesc_ntoh_uint16(btrpkt->n5.nxdata) == 100 && NetworkC$flag4[sim_node()] != 0)) {
                        __nesc_hton_uint16(temppkt->n5.nxdata, NetworkC$wa[sim_node()] / 1000);
                        NetworkC$flag5[sim_node()] = 1;
                        sim_log_debug(421U, "Forward", "temppkt5= %d.\n", __nesc_ntoh_uint16(temppkt->n5.nxdata));
                      }
                    else {
#line 1978
                      if ((__nesc_ntoh_uint16(btrpkt->n4.nxdata) == 100 && __nesc_ntoh_uint16(btrpkt->n3.nxdata) != 100 && __nesc_ntoh_uint16(btrpkt->n2.nxdata) != 100 && __nesc_ntoh_uint16(btrpkt->n1.nxdata) != 100) || (__nesc_ntoh_uint16(btrpkt->n4.nxdata) == 100 && NetworkC$flag3[sim_node()] != 0)) {
                          __nesc_hton_uint16(temppkt->n4.nxdata, NetworkC$wa[sim_node()] / 1000);
                          NetworkC$flag4[sim_node()] = 1;
                          sim_log_debug(422U, "Forward", "temppkt4= %d.\n", __nesc_ntoh_uint16(temppkt->n4.nxdata));
                        }
                      else {
#line 1983
                        if ((__nesc_ntoh_uint16(btrpkt->n3.nxdata) == 100 && __nesc_ntoh_uint16(btrpkt->n2.nxdata) != 100 && __nesc_ntoh_uint16(btrpkt->n1.nxdata) != 100) || (__nesc_ntoh_uint16(btrpkt->n3.nxdata) == 100 && NetworkC$flag2[sim_node()] != 0)) {
                            __nesc_hton_uint16(temppkt->n3.nxdata, NetworkC$wa[sim_node()] / 1000);
                            NetworkC$flag3[sim_node()] = 1;
                            sim_log_debug(423U, "Forward", "temppkt3= %d.\n", __nesc_ntoh_uint16(temppkt->n3.nxdata));
                          }
                        else {
#line 1988
                          if ((__nesc_ntoh_uint16(btrpkt->n2.nxdata) == 100 && __nesc_ntoh_uint16(btrpkt->n1.nxdata) != 100) || (__nesc_ntoh_uint16(btrpkt->n2.nxdata) == 100 && NetworkC$flag1[sim_node()] != 0)) {
                              __nesc_hton_uint16(temppkt->n2.nxdata, NetworkC$wa[sim_node()] / 1000);
                              NetworkC$flag2[sim_node()] = 1;
                              sim_log_debug(424U, "Forward", "temppkt2= %d.\n", __nesc_ntoh_uint16(temppkt->n2.nxdata));
                            }
                          else {
                            if (__nesc_ntoh_uint16(btrpkt->n1.nxdata) == 100) {
                                __nesc_hton_uint16(temppkt->n1.nxdata, NetworkC$wa[sim_node()] / 1000);
                                NetworkC$flag1[sim_node()] = 1;
                                sim_log_debug(425U, "Forward", "temppkt1= %d.\n", __nesc_ntoh_uint16(temppkt->n1.nxdata));
                              }
                            }
                          }
                        }
                      }
                    }
#line 2000
                  NetworkC$wa[sim_node()] = (NetworkC$wa[sim_node()] - NetworkC$wa[sim_node()] / 1000 * 1000) * 10;
                  NetworkC$wb[sim_node()] = (NetworkC$wb[sim_node()] - NetworkC$wb[sim_node()] / 1000 * 1000) * 10;
                  sim_log_debug(426U, "Forward", "wa1= %d.\n", NetworkC$wa[sim_node()]);
                  sim_log_debug(427U, "Forward", "wb1= %d.\n", NetworkC$wb[sim_node()]);

                  NetworkC$ws1[sim_node()] = NetworkC$weishu(NetworkC$wa[sim_node()]);
                  NetworkC$ws2[sim_node()] = NetworkC$weishu(NetworkC$wb[sim_node()]);
                  NetworkC$flag[sim_node()] = 1;
                }

              NetworkC$wa2[sim_node()] = (float )NetworkC$wa[sim_node()] / 10000;
              NetworkC$wb2[sim_node()] = (float )NetworkC$wb[sim_node()] / 10000;

              sim_log_debug(428U, "Forward", "wa2= %f.\n", NetworkC$wa2[sim_node()]);
              sim_log_debug(429U, "Forward", "wb2= %f.\n", NetworkC$wb2[sim_node()]);

              __nesc_hton_uint16(temppkt->a.nxdata, (int )(NetworkC$wa2[sim_node()] * NetworkC$z[sim_node()]));
              __nesc_hton_uint16(temppkt->b.nxdata, (int )(NetworkC$wb2[sim_node()] * NetworkC$z[sim_node()]));
              if (NetworkC$flag[sim_node()] == 0) {
                  __nesc_hton_uint16(temppkt->n1.nxdata, __nesc_ntoh_uint16(btrpkt->n1.nxdata));
                  __nesc_hton_uint16(temppkt->n2.nxdata, __nesc_ntoh_uint16(btrpkt->n2.nxdata));
                  __nesc_hton_uint16(temppkt->n3.nxdata, __nesc_ntoh_uint16(btrpkt->n3.nxdata));
                  __nesc_hton_uint16(temppkt->n4.nxdata, __nesc_ntoh_uint16(btrpkt->n4.nxdata));
                  __nesc_hton_uint16(temppkt->n5.nxdata, __nesc_ntoh_uint16(btrpkt->n5.nxdata));
                  __nesc_hton_uint16(temppkt->n6.nxdata, __nesc_ntoh_uint16(btrpkt->n6.nxdata));
                }
              else 
#line 2025
                {
                  NetworkC$pdflag(&NetworkC$flag[sim_node()], &NetworkC$flag1[sim_node()], &NetworkC$flag2[sim_node()], &NetworkC$flag3[sim_node()], &NetworkC$flag4[sim_node()], &NetworkC$flag5[sim_node()], &NetworkC$flag6[sim_node()], btrpkt, temppkt);
                }
              sim_log_debug(430U, "Forward", "temppkt->n1= %d.\n", __nesc_ntoh_uint16(temppkt->n1.nxdata));
              sim_log_debug(431U, "Forward", "temppkt->n2= %d.\n", __nesc_ntoh_uint16(temppkt->n2.nxdata));
              sim_log_debug(432U, "Forward", "temppkt->n3= %d.\n", __nesc_ntoh_uint16(temppkt->n3.nxdata));
              sim_log_debug(433U, "Forward", "temppkt->n4= %d.\n", __nesc_ntoh_uint16(temppkt->n4.nxdata));
              sim_log_debug(434U, "Forward", "temppkt->n5= %d.\n", __nesc_ntoh_uint16(temppkt->n5.nxdata));
              sim_log_debug(435U, "Forward", "temppkt->n6= %d.\n", __nesc_ntoh_uint16(temppkt->n6.nxdata));

              sim_log_debug(436U, "Forward", "m3-1= %f.\n", NetworkC$m[sim_node()]);
              sim_log_debug(437U, "Forward", "n3-1= %f.\n", NetworkC$n[sim_node()]);
              sim_log_debug(438U, "Forward", "a3-1= %d.\n", __nesc_ntoh_uint16(temppkt->a.nxdata));
              sim_log_debug(439U, "Forward", "b3-1= %d.\n", __nesc_ntoh_uint16(temppkt->b.nxdata));

              __nesc_hton_uint16(temppkt->nodeid.nxdata, TOS_NODE_ID);
              __nesc_hton_uint16(temppkt->sourceid.nxdata, __nesc_ntoh_uint16(btrpkt->sourceid.nxdata));
              __nesc_hton_uint16(temppkt->count.nxdata, __nesc_ntoh_uint16(btrpkt->count.nxdata));
              if (!NetworkC$busy[sim_node()]) {
                  if (NetworkC$AMSend$send(AM_BROADCAST_ADDR, &NetworkC$pkt[sim_node()], sizeof(NetworkMsg )) == SUCCESS) {
                      NetworkC$busy[sim_node()] = TRUE;
                    }
                }
            }
        }

      if (TOS_NODE_ID == 2 && __nesc_ntoh_uint16(btrpkt->nodeid.nxdata) == 6) {

          NetworkMsg *temppkt = (NetworkMsg *)NetworkC$Packet$getPayload(&NetworkC$pkt[sim_node()], sizeof(NetworkMsg ));

#line 2054
          sim_log_debug(440U, "Forward", "r62= %d.\n", NetworkC$r62[sim_node()]);
          NetworkC$ssbm(btrpkt);

          NetworkC$wa[sim_node()] = NetworkC$m[sim_node()] * 10000;
          NetworkC$wb[sim_node()] = NetworkC$n[sim_node()] * 10000;
          NetworkC$ws1[sim_node()] = NetworkC$weishu(NetworkC$wa[sim_node()]);
          NetworkC$ws2[sim_node()] = NetworkC$weishu(NetworkC$wb[sim_node()]);
          sim_log_debug(441U, "Forward", "ws1= %d.\n", NetworkC$ws1[sim_node()]);
          sim_log_debug(442U, "Forward", "ws2= %d.\n", NetworkC$ws2[sim_node()]);
          while (NetworkC$ws1[sim_node()] == NetworkC$ws2[sim_node()] && NetworkC$wa[sim_node()] / 1000 == NetworkC$wb[sim_node()] / 1000) {

              if ((__nesc_ntoh_uint16(btrpkt->n6.nxdata) == 100 && __nesc_ntoh_uint16(btrpkt->n5.nxdata) != 100 && __nesc_ntoh_uint16(btrpkt->n4.nxdata) != 100 && __nesc_ntoh_uint16(btrpkt->n3.nxdata) != 100 && __nesc_ntoh_uint16(btrpkt->n2.nxdata) != 100 && __nesc_ntoh_uint16(btrpkt->n1.nxdata) != 100) || (__nesc_ntoh_uint16(btrpkt->n6.nxdata) == 100 && NetworkC$flag5[sim_node()] != 0)) {
                  __nesc_hton_uint16(temppkt->n6.nxdata, NetworkC$wa[sim_node()] / 1000);
                  NetworkC$flag6[sim_node()] = 1;
                  sim_log_debug(443U, "Forward", "btrpkt->n1= %d.\n", __nesc_ntoh_uint16(btrpkt->n1.nxdata));
                  sim_log_debug(444U, "Forward", "btrpkt->n2= %d.\n", __nesc_ntoh_uint16(btrpkt->n2.nxdata));
                  sim_log_debug(445U, "Forward", "btrpkt->n3= %d.\n", __nesc_ntoh_uint16(btrpkt->n3.nxdata));
                  sim_log_debug(446U, "Forward", "btrpkt->n4= %d.\n", __nesc_ntoh_uint16(btrpkt->n4.nxdata));
                  sim_log_debug(447U, "Forward", "btrpkt->n5= %d.\n", __nesc_ntoh_uint16(btrpkt->n5.nxdata));
                  sim_log_debug(448U, "Forward", "btrpkt->n6= %d.\n", __nesc_ntoh_uint16(btrpkt->n6.nxdata));
                  sim_log_debug(449U, "Forward", "temppkt6= %d.\n", __nesc_ntoh_uint16(temppkt->n6.nxdata));
                }
              else {
#line 2076
                if ((__nesc_ntoh_uint16(btrpkt->n5.nxdata) == 100 && __nesc_ntoh_uint16(btrpkt->n4.nxdata) != 100 && __nesc_ntoh_uint16(btrpkt->n3.nxdata) != 100 && __nesc_ntoh_uint16(btrpkt->n2.nxdata) != 100 && __nesc_ntoh_uint16(btrpkt->n1.nxdata) != 100) || (__nesc_ntoh_uint16(btrpkt->n5.nxdata) == 100 && NetworkC$flag4[sim_node()] != 0)) {
                    __nesc_hton_uint16(temppkt->n5.nxdata, NetworkC$wa[sim_node()] / 1000);
                    NetworkC$flag5[sim_node()] = 1;
                    sim_log_debug(450U, "Forward", "temppkt5= %d.\n", __nesc_ntoh_uint16(temppkt->n5.nxdata));
                  }
                else {
#line 2081
                  if ((__nesc_ntoh_uint16(btrpkt->n4.nxdata) == 100 && __nesc_ntoh_uint16(btrpkt->n3.nxdata) != 100 && __nesc_ntoh_uint16(btrpkt->n2.nxdata) != 100 && __nesc_ntoh_uint16(btrpkt->n1.nxdata) != 100) || (__nesc_ntoh_uint16(btrpkt->n4.nxdata) == 100 && NetworkC$flag3[sim_node()] != 0)) {
                      __nesc_hton_uint16(temppkt->n4.nxdata, NetworkC$wa[sim_node()] / 1000);
                      NetworkC$flag4[sim_node()] = 1;
                      sim_log_debug(451U, "Forward", "temppkt4= %d.\n", __nesc_ntoh_uint16(temppkt->n4.nxdata));
                    }
                  else {
#line 2086
                    if ((__nesc_ntoh_uint16(btrpkt->n3.nxdata) == 100 && __nesc_ntoh_uint16(btrpkt->n2.nxdata) != 100 && __nesc_ntoh_uint16(btrpkt->n1.nxdata) != 100) || (__nesc_ntoh_uint16(btrpkt->n3.nxdata) == 100 && NetworkC$flag2[sim_node()] != 0)) {
                        __nesc_hton_uint16(temppkt->n3.nxdata, NetworkC$wa[sim_node()] / 1000);
                        NetworkC$flag3[sim_node()] = 1;
                        sim_log_debug(452U, "Forward", "temppkt3= %d.\n", __nesc_ntoh_uint16(temppkt->n3.nxdata));
                      }
                    else {
#line 2091
                      if ((__nesc_ntoh_uint16(btrpkt->n2.nxdata) == 100 && __nesc_ntoh_uint16(btrpkt->n1.nxdata) != 100) || (__nesc_ntoh_uint16(btrpkt->n2.nxdata) == 100 && NetworkC$flag1[sim_node()] != 0)) {
                          __nesc_hton_uint16(temppkt->n2.nxdata, NetworkC$wa[sim_node()] / 1000);
                          NetworkC$flag2[sim_node()] = 1;
                          sim_log_debug(453U, "Forward", "temppkt2= %d.\n", __nesc_ntoh_uint16(temppkt->n2.nxdata));
                        }
                      else {
                        if (__nesc_ntoh_uint16(btrpkt->n1.nxdata) == 100) {
                            __nesc_hton_uint16(temppkt->n1.nxdata, NetworkC$wa[sim_node()] / 1000);
                            NetworkC$flag1[sim_node()] = 1;
                            sim_log_debug(454U, "Forward", "temppkt1= %d.\n", __nesc_ntoh_uint16(temppkt->n1.nxdata));
                          }
                        }
                      }
                    }
                  }
                }
#line 2103
              NetworkC$wa[sim_node()] = (NetworkC$wa[sim_node()] - NetworkC$wa[sim_node()] / 1000 * 1000) * 10;
              NetworkC$wb[sim_node()] = (NetworkC$wb[sim_node()] - NetworkC$wb[sim_node()] / 1000 * 1000) * 10;
              sim_log_debug(455U, "Forward", "wa1= %d.\n", NetworkC$wa[sim_node()]);
              sim_log_debug(456U, "Forward", "wb1= %d.\n", NetworkC$wb[sim_node()]);

              NetworkC$ws1[sim_node()] = NetworkC$weishu(NetworkC$wa[sim_node()]);
              NetworkC$ws2[sim_node()] = NetworkC$weishu(NetworkC$wb[sim_node()]);
              NetworkC$flag[sim_node()] = 1;
            }

          NetworkC$wa2[sim_node()] = (float )NetworkC$wa[sim_node()] / 10000;
          NetworkC$wb2[sim_node()] = (float )NetworkC$wb[sim_node()] / 10000;

          sim_log_debug(457U, "Forward", "wa2= %f.\n", NetworkC$wa2[sim_node()]);
          sim_log_debug(458U, "Forward", "wb2= %f.\n", NetworkC$wb2[sim_node()]);

          __nesc_hton_uint16(temppkt->a.nxdata, (int )(NetworkC$wa2[sim_node()] * NetworkC$z[sim_node()]));
          __nesc_hton_uint16(temppkt->b.nxdata, (int )(NetworkC$wb2[sim_node()] * NetworkC$z[sim_node()]));
          if (NetworkC$flag[sim_node()] == 0) {
              __nesc_hton_uint16(temppkt->n1.nxdata, __nesc_ntoh_uint16(btrpkt->n1.nxdata));
              __nesc_hton_uint16(temppkt->n2.nxdata, __nesc_ntoh_uint16(btrpkt->n2.nxdata));
              __nesc_hton_uint16(temppkt->n3.nxdata, __nesc_ntoh_uint16(btrpkt->n3.nxdata));
              __nesc_hton_uint16(temppkt->n4.nxdata, __nesc_ntoh_uint16(btrpkt->n4.nxdata));
              __nesc_hton_uint16(temppkt->n5.nxdata, __nesc_ntoh_uint16(btrpkt->n5.nxdata));
              __nesc_hton_uint16(temppkt->n6.nxdata, __nesc_ntoh_uint16(btrpkt->n6.nxdata));
            }
          else 
#line 2128
            {
              NetworkC$pdflag(&NetworkC$flag[sim_node()], &NetworkC$flag1[sim_node()], &NetworkC$flag2[sim_node()], &NetworkC$flag3[sim_node()], &NetworkC$flag4[sim_node()], &NetworkC$flag5[sim_node()], &NetworkC$flag6[sim_node()], btrpkt, temppkt);
            }
          sim_log_debug(459U, "Forward", "temppkt->n1= %d.\n", __nesc_ntoh_uint16(temppkt->n1.nxdata));
          sim_log_debug(460U, "Forward", "temppkt->n2= %d.\n", __nesc_ntoh_uint16(temppkt->n2.nxdata));
          sim_log_debug(461U, "Forward", "temppkt->n3= %d.\n", __nesc_ntoh_uint16(temppkt->n3.nxdata));
          sim_log_debug(462U, "Forward", "temppkt->n4= %d.\n", __nesc_ntoh_uint16(temppkt->n4.nxdata));
          sim_log_debug(463U, "Forward", "temppkt->n5= %d.\n", __nesc_ntoh_uint16(temppkt->n5.nxdata));
          sim_log_debug(464U, "Forward", "temppkt->n6= %d.\n", __nesc_ntoh_uint16(temppkt->n6.nxdata));

          sim_log_debug(465U, "Forward", "m6-2= %f.\n", NetworkC$m[sim_node()]);
          sim_log_debug(466U, "Forward", "n6-2= %f.\n", NetworkC$n[sim_node()]);
          sim_log_debug(467U, "Forward", "a6-2= %d.\n", __nesc_ntoh_uint16(temppkt->a.nxdata));
          sim_log_debug(468U, "Forward", "b6-2= %d.\n", __nesc_ntoh_uint16(temppkt->b.nxdata));

          __nesc_hton_uint16(temppkt->nodeid.nxdata, TOS_NODE_ID);
          __nesc_hton_uint16(temppkt->sourceid.nxdata, __nesc_ntoh_uint16(btrpkt->sourceid.nxdata));
          __nesc_hton_uint16(temppkt->count.nxdata, __nesc_ntoh_uint16(btrpkt->count.nxdata));

          if (!NetworkC$busy[sim_node()]) {
              if (NetworkC$AMSend$send(AM_BROADCAST_ADDR, &NetworkC$pkt[sim_node()], sizeof(NetworkMsg )) == SUCCESS) {
                  NetworkC$busy[sim_node()] = TRUE;
                }
            }
        }

      if (TOS_NODE_ID == 7) {
          sim_log_debug(469U, "Forward", "r10227= %d.\n", NetworkC$r10227[sim_node()]);
          sim_log_debug(470U, "Forward", "r107= %d.\n", NetworkC$r107[sim_node()]);
          sim_log_debug(471U, "Forward", "r227= %d.\n", NetworkC$r227[sim_node()]);
          sim_log_debug(472U, "Forward", "s7[0]= %f.\n", NetworkC$s7[sim_node()][0]);
          sim_log_debug(473U, "Forward", "s7[1]= %f.\n", NetworkC$s7[sim_node()][1]);
          sim_log_debug(474U, "Forward", "s7[2]= %f.\n", NetworkC$s7[sim_node()][2]);
          sim_log_debug(475U, "Forward", "s7[3]= %f.\n", NetworkC$s7[sim_node()][3]);
          if (__nesc_ntoh_uint16(btrpkt->nodeid.nxdata) == 10) {

              NetworkMsg *temppkt = (NetworkMsg *)NetworkC$Packet$getPayload(&NetworkC$pkt[sim_node()], sizeof(NetworkMsg ));

              NetworkC$ssbm(btrpkt);
              NetworkC$wa[sim_node()] = NetworkC$m[sim_node()] * 10000;
              NetworkC$wb[sim_node()] = NetworkC$n[sim_node()] * 10000;

              NetworkC$ws1[sim_node()] = NetworkC$weishu(NetworkC$wa[sim_node()]);
              NetworkC$ws2[sim_node()] = NetworkC$weishu(NetworkC$wb[sim_node()]);
              sim_log_debug(476U, "Forward", "ws1= %d.\n", NetworkC$ws1[sim_node()]);
              sim_log_debug(477U, "Forward", "ws2= %d.\n", NetworkC$ws2[sim_node()]);
              while (NetworkC$ws1[sim_node()] == NetworkC$ws2[sim_node()] && NetworkC$wa[sim_node()] / 1000 == NetworkC$wb[sim_node()] / 1000) {

                  if ((__nesc_ntoh_uint16(btrpkt->n6.nxdata) == 100 && __nesc_ntoh_uint16(btrpkt->n5.nxdata) != 100 && __nesc_ntoh_uint16(btrpkt->n4.nxdata) != 100 && __nesc_ntoh_uint16(btrpkt->n3.nxdata) != 100 && __nesc_ntoh_uint16(btrpkt->n2.nxdata) != 100 && __nesc_ntoh_uint16(btrpkt->n1.nxdata) != 100) || (__nesc_ntoh_uint16(btrpkt->n6.nxdata) == 100 && NetworkC$flag5[sim_node()] != 0)) {
                      __nesc_hton_uint16(temppkt->n6.nxdata, NetworkC$wa[sim_node()] / 1000);
                      NetworkC$flag6[sim_node()] = 1;
                      sim_log_debug(478U, "Forward", "btrpkt->n1= %d.\n", __nesc_ntoh_uint16(btrpkt->n1.nxdata));
                      sim_log_debug(479U, "Forward", "btrpkt->n2= %d.\n", __nesc_ntoh_uint16(btrpkt->n2.nxdata));
                      sim_log_debug(480U, "Forward", "btrpkt->n3= %d.\n", __nesc_ntoh_uint16(btrpkt->n3.nxdata));
                      sim_log_debug(481U, "Forward", "btrpkt->n4= %d.\n", __nesc_ntoh_uint16(btrpkt->n4.nxdata));
                      sim_log_debug(482U, "Forward", "btrpkt->n5= %d.\n", __nesc_ntoh_uint16(btrpkt->n5.nxdata));
                      sim_log_debug(483U, "Forward", "btrpkt->n6= %d.\n", __nesc_ntoh_uint16(btrpkt->n6.nxdata));
                      sim_log_debug(484U, "Forward", "temppkt6= %d.\n", __nesc_ntoh_uint16(temppkt->n6.nxdata));
                    }
                  else {
#line 2187
                    if ((__nesc_ntoh_uint16(btrpkt->n5.nxdata) == 100 && __nesc_ntoh_uint16(btrpkt->n4.nxdata) != 100 && __nesc_ntoh_uint16(btrpkt->n3.nxdata) != 100 && __nesc_ntoh_uint16(btrpkt->n2.nxdata) != 100 && __nesc_ntoh_uint16(btrpkt->n1.nxdata) != 100) || (__nesc_ntoh_uint16(btrpkt->n5.nxdata) == 100 && NetworkC$flag4[sim_node()] != 0)) {
                        __nesc_hton_uint16(temppkt->n5.nxdata, NetworkC$wa[sim_node()] / 1000);
                        NetworkC$flag5[sim_node()] = 1;
                        sim_log_debug(485U, "Forward", "temppkt5= %d.\n", __nesc_ntoh_uint16(temppkt->n5.nxdata));
                      }
                    else {
#line 2192
                      if ((__nesc_ntoh_uint16(btrpkt->n4.nxdata) == 100 && __nesc_ntoh_uint16(btrpkt->n3.nxdata) != 100 && __nesc_ntoh_uint16(btrpkt->n2.nxdata) != 100 && __nesc_ntoh_uint16(btrpkt->n1.nxdata) != 100) || (__nesc_ntoh_uint16(btrpkt->n4.nxdata) == 100 && NetworkC$flag3[sim_node()] != 0)) {
                          __nesc_hton_uint16(temppkt->n4.nxdata, NetworkC$wa[sim_node()] / 1000);
                          NetworkC$flag4[sim_node()] = 1;
                          sim_log_debug(486U, "Forward", "temppkt4= %d.\n", __nesc_ntoh_uint16(temppkt->n4.nxdata));
                        }
                      else {
#line 2197
                        if ((__nesc_ntoh_uint16(btrpkt->n3.nxdata) == 100 && __nesc_ntoh_uint16(btrpkt->n2.nxdata) != 100 && __nesc_ntoh_uint16(btrpkt->n1.nxdata) != 100) || (__nesc_ntoh_uint16(btrpkt->n3.nxdata) == 100 && NetworkC$flag2[sim_node()] != 0)) {
                            __nesc_hton_uint16(temppkt->n3.nxdata, NetworkC$wa[sim_node()] / 1000);
                            NetworkC$flag3[sim_node()] = 1;
                            sim_log_debug(487U, "Forward", "temppkt3= %d.\n", __nesc_ntoh_uint16(temppkt->n3.nxdata));
                          }
                        else {
#line 2202
                          if ((__nesc_ntoh_uint16(btrpkt->n2.nxdata) == 100 && __nesc_ntoh_uint16(btrpkt->n1.nxdata) != 100) || (__nesc_ntoh_uint16(btrpkt->n2.nxdata) == 100 && NetworkC$flag1[sim_node()] != 0)) {
                              __nesc_hton_uint16(temppkt->n2.nxdata, NetworkC$wa[sim_node()] / 1000);
                              NetworkC$flag2[sim_node()] = 1;
                              sim_log_debug(488U, "Forward", "temppkt2= %d.\n", __nesc_ntoh_uint16(temppkt->n2.nxdata));
                            }
                          else {
                            if (__nesc_ntoh_uint16(btrpkt->n1.nxdata) == 100) {
                                __nesc_hton_uint16(temppkt->n1.nxdata, NetworkC$wa[sim_node()] / 1000);
                                NetworkC$flag1[sim_node()] = 1;
                                sim_log_debug(489U, "Forward", "temppkt1= %d.\n", __nesc_ntoh_uint16(temppkt->n1.nxdata));
                              }
                            }
                          }
                        }
                      }
                    }
#line 2214
                  NetworkC$wa[sim_node()] = (NetworkC$wa[sim_node()] - NetworkC$wa[sim_node()] / 1000 * 1000) * 10;
                  NetworkC$wb[sim_node()] = (NetworkC$wb[sim_node()] - NetworkC$wb[sim_node()] / 1000 * 1000) * 10;
                  sim_log_debug(490U, "Forward", "wa1= %d.\n", NetworkC$wa[sim_node()]);
                  sim_log_debug(491U, "Forward", "wb1= %d.\n", NetworkC$wb[sim_node()]);

                  NetworkC$ws1[sim_node()] = NetworkC$weishu(NetworkC$wa[sim_node()]);
                  NetworkC$ws2[sim_node()] = NetworkC$weishu(NetworkC$wb[sim_node()]);
                  NetworkC$flag[sim_node()] = 1;
                }

              NetworkC$wa2[sim_node()] = (float )NetworkC$wa[sim_node()] / 10000;
              NetworkC$wb2[sim_node()] = (float )NetworkC$wb[sim_node()] / 10000;

              sim_log_debug(492U, "Forward", "wa2= %f.\n", NetworkC$wa2[sim_node()]);
              sim_log_debug(493U, "Forward", "wb2= %f.\n", NetworkC$wb2[sim_node()]);

              __nesc_hton_uint16(temppkt->a.nxdata, (int )(NetworkC$wa2[sim_node()] * NetworkC$z[sim_node()]));
              __nesc_hton_uint16(temppkt->b.nxdata, (int )(NetworkC$wb2[sim_node()] * NetworkC$z[sim_node()]));
              if (NetworkC$flag[sim_node()] == 0) {
                  __nesc_hton_uint16(temppkt->n1.nxdata, __nesc_ntoh_uint16(btrpkt->n1.nxdata));
                  __nesc_hton_uint16(temppkt->n2.nxdata, __nesc_ntoh_uint16(btrpkt->n2.nxdata));
                  __nesc_hton_uint16(temppkt->n3.nxdata, __nesc_ntoh_uint16(btrpkt->n3.nxdata));
                  __nesc_hton_uint16(temppkt->n4.nxdata, __nesc_ntoh_uint16(btrpkt->n4.nxdata));
                  __nesc_hton_uint16(temppkt->n5.nxdata, __nesc_ntoh_uint16(btrpkt->n5.nxdata));
                  __nesc_hton_uint16(temppkt->n6.nxdata, __nesc_ntoh_uint16(btrpkt->n6.nxdata));
                }
              else 
#line 2239
                {
                  NetworkC$pdflag(&NetworkC$flag[sim_node()], &NetworkC$flag1[sim_node()], &NetworkC$flag2[sim_node()], &NetworkC$flag3[sim_node()], &NetworkC$flag4[sim_node()], &NetworkC$flag5[sim_node()], &NetworkC$flag6[sim_node()], btrpkt, temppkt);
                }
              sim_log_debug(494U, "Forward", "temppkt->n1= %d.\n", __nesc_ntoh_uint16(temppkt->n1.nxdata));
              sim_log_debug(495U, "Forward", "temppkt->n2= %d.\n", __nesc_ntoh_uint16(temppkt->n2.nxdata));
              sim_log_debug(496U, "Forward", "temppkt->n3= %d.\n", __nesc_ntoh_uint16(temppkt->n3.nxdata));
              sim_log_debug(497U, "Forward", "temppkt->n4= %d.\n", __nesc_ntoh_uint16(temppkt->n4.nxdata));
              sim_log_debug(498U, "Forward", "temppkt->n5= %d.\n", __nesc_ntoh_uint16(temppkt->n5.nxdata));
              sim_log_debug(499U, "Forward", "temppkt->n6= %d.\n", __nesc_ntoh_uint16(temppkt->n6.nxdata));

              sim_log_debug(500U, "Forward", "m10-7= %f.\n", NetworkC$m[sim_node()]);
              sim_log_debug(501U, "Forward", "n10-7= %f.\n", NetworkC$n[sim_node()]);
              sim_log_debug(502U, "Forward", "a10-7= %d.\n", __nesc_ntoh_uint16(temppkt->a.nxdata));
              sim_log_debug(503U, "Forward", "b10-7= %d.\n", __nesc_ntoh_uint16(temppkt->b.nxdata));

              __nesc_hton_uint16(temppkt->nodeid.nxdata, TOS_NODE_ID);
              __nesc_hton_uint16(temppkt->sourceid.nxdata, __nesc_ntoh_uint16(btrpkt->sourceid.nxdata));
              __nesc_hton_uint16(temppkt->count.nxdata, __nesc_ntoh_uint16(btrpkt->count.nxdata));
              if (!NetworkC$busy[sim_node()]) {
                  if (NetworkC$AMSend$send(AM_BROADCAST_ADDR, &NetworkC$pkt[sim_node()], sizeof(NetworkMsg )) == SUCCESS) {
                      NetworkC$busy[sim_node()] = TRUE;
                    }
                }
            }
          if (__nesc_ntoh_uint16(btrpkt->nodeid.nxdata) == 22) {
              NetworkMsg *temppkt = (NetworkMsg *)NetworkC$Packet$getPayload(&NetworkC$pkt[sim_node()], sizeof(NetworkMsg ));

              NetworkC$ssbm(btrpkt);
              NetworkC$wa[sim_node()] = NetworkC$m[sim_node()] * 10000;
              NetworkC$wb[sim_node()] = NetworkC$n[sim_node()] * 10000;

              NetworkC$ws1[sim_node()] = NetworkC$weishu(NetworkC$wa[sim_node()]);
              NetworkC$ws2[sim_node()] = NetworkC$weishu(NetworkC$wb[sim_node()]);
              sim_log_debug(504U, "Forward", "ws1= %d.\n", NetworkC$ws1[sim_node()]);
              sim_log_debug(505U, "Forward", "ws2= %d.\n", NetworkC$ws2[sim_node()]);
              while (NetworkC$ws1[sim_node()] == NetworkC$ws2[sim_node()] && NetworkC$wa[sim_node()] / 1000 == NetworkC$wb[sim_node()] / 1000) {

                  if ((__nesc_ntoh_uint16(btrpkt->n6.nxdata) == 100 && __nesc_ntoh_uint16(btrpkt->n5.nxdata) != 100 && __nesc_ntoh_uint16(btrpkt->n4.nxdata) != 100 && __nesc_ntoh_uint16(btrpkt->n3.nxdata) != 100 && __nesc_ntoh_uint16(btrpkt->n2.nxdata) != 100 && __nesc_ntoh_uint16(btrpkt->n1.nxdata) != 100) || (__nesc_ntoh_uint16(btrpkt->n6.nxdata) == 100 && NetworkC$flag5[sim_node()] != 0)) {
                      __nesc_hton_uint16(temppkt->n6.nxdata, NetworkC$wa[sim_node()] / 1000);
                      NetworkC$flag6[sim_node()] = 1;
                      sim_log_debug(506U, "Forward", "btrpkt->n1= %d.\n", __nesc_ntoh_uint16(btrpkt->n1.nxdata));
                      sim_log_debug(507U, "Forward", "btrpkt->n2= %d.\n", __nesc_ntoh_uint16(btrpkt->n2.nxdata));
                      sim_log_debug(508U, "Forward", "btrpkt->n3= %d.\n", __nesc_ntoh_uint16(btrpkt->n3.nxdata));
                      sim_log_debug(509U, "Forward", "btrpkt->n4= %d.\n", __nesc_ntoh_uint16(btrpkt->n4.nxdata));
                      sim_log_debug(510U, "Forward", "btrpkt->n5= %d.\n", __nesc_ntoh_uint16(btrpkt->n5.nxdata));
                      sim_log_debug(511U, "Forward", "btrpkt->n6= %d.\n", __nesc_ntoh_uint16(btrpkt->n6.nxdata));
                      sim_log_debug(512U, "Forward", "temppkt6= %d.\n", __nesc_ntoh_uint16(temppkt->n6.nxdata));
                    }
                  else {
#line 2287
                    if ((__nesc_ntoh_uint16(btrpkt->n5.nxdata) == 100 && __nesc_ntoh_uint16(btrpkt->n4.nxdata) != 100 && __nesc_ntoh_uint16(btrpkt->n3.nxdata) != 100 && __nesc_ntoh_uint16(btrpkt->n2.nxdata) != 100 && __nesc_ntoh_uint16(btrpkt->n1.nxdata) != 100) || (__nesc_ntoh_uint16(btrpkt->n5.nxdata) == 100 && NetworkC$flag4[sim_node()] != 0)) {
                        __nesc_hton_uint16(temppkt->n5.nxdata, NetworkC$wa[sim_node()] / 1000);
                        NetworkC$flag5[sim_node()] = 1;
                        sim_log_debug(513U, "Forward", "temppkt5= %d.\n", __nesc_ntoh_uint16(temppkt->n5.nxdata));
                      }
                    else {
#line 2292
                      if ((__nesc_ntoh_uint16(btrpkt->n4.nxdata) == 100 && __nesc_ntoh_uint16(btrpkt->n3.nxdata) != 100 && __nesc_ntoh_uint16(btrpkt->n2.nxdata) != 100 && __nesc_ntoh_uint16(btrpkt->n1.nxdata) != 100) || (__nesc_ntoh_uint16(btrpkt->n4.nxdata) == 100 && NetworkC$flag3[sim_node()] != 0)) {
                          __nesc_hton_uint16(temppkt->n4.nxdata, NetworkC$wa[sim_node()] / 1000);
                          NetworkC$flag4[sim_node()] = 1;
                          sim_log_debug(514U, "Forward", "temppkt4= %d.\n", __nesc_ntoh_uint16(temppkt->n4.nxdata));
                        }
                      else {
#line 2297
                        if ((__nesc_ntoh_uint16(btrpkt->n3.nxdata) == 100 && __nesc_ntoh_uint16(btrpkt->n2.nxdata) != 100 && __nesc_ntoh_uint16(btrpkt->n1.nxdata) != 100) || (__nesc_ntoh_uint16(btrpkt->n3.nxdata) == 100 && NetworkC$flag2[sim_node()] != 0)) {
                            __nesc_hton_uint16(temppkt->n3.nxdata, NetworkC$wa[sim_node()] / 1000);
                            NetworkC$flag3[sim_node()] = 1;
                            sim_log_debug(515U, "Forward", "temppkt3= %d.\n", __nesc_ntoh_uint16(temppkt->n3.nxdata));
                          }
                        else {
#line 2302
                          if ((__nesc_ntoh_uint16(btrpkt->n2.nxdata) == 100 && __nesc_ntoh_uint16(btrpkt->n1.nxdata) != 100) || (__nesc_ntoh_uint16(btrpkt->n2.nxdata) == 100 && NetworkC$flag1[sim_node()] != 0)) {
                              __nesc_hton_uint16(temppkt->n2.nxdata, NetworkC$wa[sim_node()] / 1000);
                              NetworkC$flag2[sim_node()] = 1;
                              sim_log_debug(516U, "Forward", "temppkt2= %d.\n", __nesc_ntoh_uint16(temppkt->n2.nxdata));
                            }
                          else {
                            if (__nesc_ntoh_uint16(btrpkt->n1.nxdata) == 100) {
                                __nesc_hton_uint16(temppkt->n1.nxdata, NetworkC$wa[sim_node()] / 1000);
                                NetworkC$flag1[sim_node()] = 1;
                                sim_log_debug(517U, "Forward", "temppkt1= %d.\n", __nesc_ntoh_uint16(temppkt->n1.nxdata));
                              }
                            }
                          }
                        }
                      }
                    }
#line 2314
                  NetworkC$wa[sim_node()] = (NetworkC$wa[sim_node()] - NetworkC$wa[sim_node()] / 1000 * 1000) * 10;
                  NetworkC$wb[sim_node()] = (NetworkC$wb[sim_node()] - NetworkC$wb[sim_node()] / 1000 * 1000) * 10;
                  sim_log_debug(518U, "Forward", "wa1= %d.\n", NetworkC$wa[sim_node()]);
                  sim_log_debug(519U, "Forward", "wb1= %d.\n", NetworkC$wb[sim_node()]);

                  NetworkC$ws1[sim_node()] = NetworkC$weishu(NetworkC$wa[sim_node()]);
                  NetworkC$ws2[sim_node()] = NetworkC$weishu(NetworkC$wb[sim_node()]);
                  NetworkC$flag[sim_node()] = 1;
                }

              NetworkC$wa2[sim_node()] = (float )NetworkC$wa[sim_node()] / 10000;
              NetworkC$wb2[sim_node()] = (float )NetworkC$wb[sim_node()] / 10000;

              sim_log_debug(520U, "Forward", "wa2= %f.\n", NetworkC$wa2[sim_node()]);
              sim_log_debug(521U, "Forward", "wb2= %f.\n", NetworkC$wb2[sim_node()]);

              __nesc_hton_uint16(temppkt->a.nxdata, (int )(NetworkC$wa2[sim_node()] * NetworkC$z[sim_node()]));
              __nesc_hton_uint16(temppkt->b.nxdata, (int )(NetworkC$wb2[sim_node()] * NetworkC$z[sim_node()]));
              if (NetworkC$flag[sim_node()] == 0) {
                  __nesc_hton_uint16(temppkt->n1.nxdata, __nesc_ntoh_uint16(btrpkt->n1.nxdata));
                  __nesc_hton_uint16(temppkt->n2.nxdata, __nesc_ntoh_uint16(btrpkt->n2.nxdata));
                  __nesc_hton_uint16(temppkt->n3.nxdata, __nesc_ntoh_uint16(btrpkt->n3.nxdata));
                  __nesc_hton_uint16(temppkt->n4.nxdata, __nesc_ntoh_uint16(btrpkt->n4.nxdata));
                  __nesc_hton_uint16(temppkt->n5.nxdata, __nesc_ntoh_uint16(btrpkt->n5.nxdata));
                  __nesc_hton_uint16(temppkt->n6.nxdata, __nesc_ntoh_uint16(btrpkt->n6.nxdata));
                }
              else 
#line 2339
                {
                  NetworkC$pdflag(&NetworkC$flag[sim_node()], &NetworkC$flag1[sim_node()], &NetworkC$flag2[sim_node()], &NetworkC$flag3[sim_node()], &NetworkC$flag4[sim_node()], &NetworkC$flag5[sim_node()], &NetworkC$flag6[sim_node()], btrpkt, temppkt);
                }
              sim_log_debug(522U, "Forward", "temppkt->n1= %d.\n", __nesc_ntoh_uint16(temppkt->n1.nxdata));
              sim_log_debug(523U, "Forward", "temppkt->n2= %d.\n", __nesc_ntoh_uint16(temppkt->n2.nxdata));
              sim_log_debug(524U, "Forward", "temppkt->n3= %d.\n", __nesc_ntoh_uint16(temppkt->n3.nxdata));
              sim_log_debug(525U, "Forward", "temppkt->n4= %d.\n", __nesc_ntoh_uint16(temppkt->n4.nxdata));
              sim_log_debug(526U, "Forward", "temppkt->n5= %d.\n", __nesc_ntoh_uint16(temppkt->n5.nxdata));
              sim_log_debug(527U, "Forward", "temppkt->n6= %d.\n", __nesc_ntoh_uint16(temppkt->n6.nxdata));

              sim_log_debug(528U, "Forward", "m22-7= %f.\n", NetworkC$m[sim_node()]);
              sim_log_debug(529U, "Forward", "n22-7= %f.\n", NetworkC$n[sim_node()]);
              sim_log_debug(530U, "Forward", "a22-7= %d.\n", __nesc_ntoh_uint16(temppkt->a.nxdata));
              sim_log_debug(531U, "Forward", "b22-7= %d.\n", __nesc_ntoh_uint16(temppkt->b.nxdata));

              __nesc_hton_uint16(temppkt->nodeid.nxdata, TOS_NODE_ID);
              __nesc_hton_uint16(temppkt->sourceid.nxdata, __nesc_ntoh_uint16(btrpkt->sourceid.nxdata));
              __nesc_hton_uint16(temppkt->count.nxdata, __nesc_ntoh_uint16(btrpkt->count.nxdata));
              if (!NetworkC$busy[sim_node()]) {
                  if (NetworkC$AMSend$send(AM_BROADCAST_ADDR, &NetworkC$pkt[sim_node()], sizeof(NetworkMsg )) == SUCCESS) {
                      NetworkC$busy[sim_node()] = TRUE;
                    }
                }
            }
        }

      if (TOS_NODE_ID == 9 && __nesc_ntoh_uint16(btrpkt->nodeid.nxdata) == 43) {
          NetworkMsg *temppkt = (NetworkMsg *)NetworkC$Packet$getPayload(&NetworkC$pkt[sim_node()], sizeof(NetworkMsg ));

#line 2367
          sim_log_debug(532U, "Forward", "r439= %d.\n", NetworkC$r439[sim_node()]);
          NetworkC$ssbm(btrpkt);
          NetworkC$wa[sim_node()] = NetworkC$m[sim_node()] * 10000;
          NetworkC$wb[sim_node()] = NetworkC$n[sim_node()] * 10000;

          NetworkC$ws1[sim_node()] = NetworkC$weishu(NetworkC$wa[sim_node()]);
          NetworkC$ws2[sim_node()] = NetworkC$weishu(NetworkC$wb[sim_node()]);
          sim_log_debug(533U, "Forward", "ws1= %d.\n", NetworkC$ws1[sim_node()]);
          sim_log_debug(534U, "Forward", "ws2= %d.\n", NetworkC$ws2[sim_node()]);
          while (NetworkC$ws1[sim_node()] == NetworkC$ws2[sim_node()] && NetworkC$wa[sim_node()] / 1000 == NetworkC$wb[sim_node()] / 1000) {

              if ((__nesc_ntoh_uint16(btrpkt->n6.nxdata) == 100 && __nesc_ntoh_uint16(btrpkt->n5.nxdata) != 100 && __nesc_ntoh_uint16(btrpkt->n4.nxdata) != 100 && __nesc_ntoh_uint16(btrpkt->n3.nxdata) != 100 && __nesc_ntoh_uint16(btrpkt->n2.nxdata) != 100 && __nesc_ntoh_uint16(btrpkt->n1.nxdata) != 100) || (__nesc_ntoh_uint16(btrpkt->n6.nxdata) == 100 && NetworkC$flag5[sim_node()] != 0)) {
                  __nesc_hton_uint16(temppkt->n6.nxdata, NetworkC$wa[sim_node()] / 1000);
                  NetworkC$flag6[sim_node()] = 1;
                  sim_log_debug(535U, "Forward", "btrpkt->n1= %d.\n", __nesc_ntoh_uint16(btrpkt->n1.nxdata));
                  sim_log_debug(536U, "Forward", "btrpkt->n2= %d.\n", __nesc_ntoh_uint16(btrpkt->n2.nxdata));
                  sim_log_debug(537U, "Forward", "btrpkt->n3= %d.\n", __nesc_ntoh_uint16(btrpkt->n3.nxdata));
                  sim_log_debug(538U, "Forward", "btrpkt->n4= %d.\n", __nesc_ntoh_uint16(btrpkt->n4.nxdata));
                  sim_log_debug(539U, "Forward", "btrpkt->n5= %d.\n", __nesc_ntoh_uint16(btrpkt->n5.nxdata));
                  sim_log_debug(540U, "Forward", "btrpkt->n6= %d.\n", __nesc_ntoh_uint16(btrpkt->n6.nxdata));
                  sim_log_debug(541U, "Forward", "temppkt6= %d.\n", __nesc_ntoh_uint16(temppkt->n6.nxdata));
                }
              else {
#line 2389
                if ((__nesc_ntoh_uint16(btrpkt->n5.nxdata) == 100 && __nesc_ntoh_uint16(btrpkt->n4.nxdata) != 100 && __nesc_ntoh_uint16(btrpkt->n3.nxdata) != 100 && __nesc_ntoh_uint16(btrpkt->n2.nxdata) != 100 && __nesc_ntoh_uint16(btrpkt->n1.nxdata) != 100) || (__nesc_ntoh_uint16(btrpkt->n5.nxdata) == 100 && NetworkC$flag4[sim_node()] != 0)) {
                    __nesc_hton_uint16(temppkt->n5.nxdata, NetworkC$wa[sim_node()] / 1000);
                    NetworkC$flag5[sim_node()] = 1;
                    sim_log_debug(542U, "Forward", "temppkt5= %d.\n", __nesc_ntoh_uint16(temppkt->n5.nxdata));
                  }
                else {
#line 2394
                  if ((__nesc_ntoh_uint16(btrpkt->n4.nxdata) == 100 && __nesc_ntoh_uint16(btrpkt->n3.nxdata) != 100 && __nesc_ntoh_uint16(btrpkt->n2.nxdata) != 100 && __nesc_ntoh_uint16(btrpkt->n1.nxdata) != 100) || (__nesc_ntoh_uint16(btrpkt->n4.nxdata) == 100 && NetworkC$flag3[sim_node()] != 0)) {
                      __nesc_hton_uint16(temppkt->n4.nxdata, NetworkC$wa[sim_node()] / 1000);
                      NetworkC$flag4[sim_node()] = 1;
                      sim_log_debug(543U, "Forward", "temppkt4= %d.\n", __nesc_ntoh_uint16(temppkt->n4.nxdata));
                    }
                  else {
#line 2399
                    if ((__nesc_ntoh_uint16(btrpkt->n3.nxdata) == 100 && __nesc_ntoh_uint16(btrpkt->n2.nxdata) != 100 && __nesc_ntoh_uint16(btrpkt->n1.nxdata) != 100) || (__nesc_ntoh_uint16(btrpkt->n3.nxdata) == 100 && NetworkC$flag2[sim_node()] != 0)) {
                        __nesc_hton_uint16(temppkt->n3.nxdata, NetworkC$wa[sim_node()] / 1000);
                        NetworkC$flag3[sim_node()] = 1;
                        sim_log_debug(544U, "Forward", "temppkt3= %d.\n", __nesc_ntoh_uint16(temppkt->n3.nxdata));
                      }
                    else {
#line 2404
                      if ((__nesc_ntoh_uint16(btrpkt->n2.nxdata) == 100 && __nesc_ntoh_uint16(btrpkt->n1.nxdata) != 100) || (__nesc_ntoh_uint16(btrpkt->n2.nxdata) == 100 && NetworkC$flag1[sim_node()] != 0)) {
                          __nesc_hton_uint16(temppkt->n2.nxdata, NetworkC$wa[sim_node()] / 1000);
                          NetworkC$flag2[sim_node()] = 1;
                          sim_log_debug(545U, "Forward", "temppkt2= %d.\n", __nesc_ntoh_uint16(temppkt->n2.nxdata));
                        }
                      else {
                        if (__nesc_ntoh_uint16(btrpkt->n1.nxdata) == 100) {
                            __nesc_hton_uint16(temppkt->n1.nxdata, NetworkC$wa[sim_node()] / 1000);
                            NetworkC$flag1[sim_node()] = 1;
                            sim_log_debug(546U, "Forward", "temppkt1= %d.\n", __nesc_ntoh_uint16(temppkt->n1.nxdata));
                          }
                        }
                      }
                    }
                  }
                }
#line 2416
              NetworkC$wa[sim_node()] = (NetworkC$wa[sim_node()] - NetworkC$wa[sim_node()] / 1000 * 1000) * 10;
              NetworkC$wb[sim_node()] = (NetworkC$wb[sim_node()] - NetworkC$wb[sim_node()] / 1000 * 1000) * 10;
              sim_log_debug(547U, "Forward", "wa1= %d.\n", NetworkC$wa[sim_node()]);
              sim_log_debug(548U, "Forward", "wb1= %d.\n", NetworkC$wb[sim_node()]);

              NetworkC$ws1[sim_node()] = NetworkC$weishu(NetworkC$wa[sim_node()]);
              NetworkC$ws2[sim_node()] = NetworkC$weishu(NetworkC$wb[sim_node()]);
              NetworkC$flag[sim_node()] = 1;
            }

          NetworkC$wa2[sim_node()] = (float )NetworkC$wa[sim_node()] / 10000;
          NetworkC$wb2[sim_node()] = (float )NetworkC$wb[sim_node()] / 10000;

          sim_log_debug(549U, "Forward", "wa2= %f.\n", NetworkC$wa2[sim_node()]);
          sim_log_debug(550U, "Forward", "wb2= %f.\n", NetworkC$wb2[sim_node()]);

          __nesc_hton_uint16(temppkt->a.nxdata, (int )(NetworkC$wa2[sim_node()] * NetworkC$z[sim_node()]));
          __nesc_hton_uint16(temppkt->b.nxdata, (int )(NetworkC$wb2[sim_node()] * NetworkC$z[sim_node()]));
          if (NetworkC$flag[sim_node()] == 0) {
              __nesc_hton_uint16(temppkt->n1.nxdata, __nesc_ntoh_uint16(btrpkt->n1.nxdata));
              __nesc_hton_uint16(temppkt->n2.nxdata, __nesc_ntoh_uint16(btrpkt->n2.nxdata));
              __nesc_hton_uint16(temppkt->n3.nxdata, __nesc_ntoh_uint16(btrpkt->n3.nxdata));
              __nesc_hton_uint16(temppkt->n4.nxdata, __nesc_ntoh_uint16(btrpkt->n4.nxdata));
              __nesc_hton_uint16(temppkt->n5.nxdata, __nesc_ntoh_uint16(btrpkt->n5.nxdata));
              __nesc_hton_uint16(temppkt->n6.nxdata, __nesc_ntoh_uint16(btrpkt->n6.nxdata));
            }
          else 
#line 2441
            {
              NetworkC$pdflag(&NetworkC$flag[sim_node()], &NetworkC$flag1[sim_node()], &NetworkC$flag2[sim_node()], &NetworkC$flag3[sim_node()], &NetworkC$flag4[sim_node()], &NetworkC$flag5[sim_node()], &NetworkC$flag6[sim_node()], btrpkt, temppkt);
            }
          sim_log_debug(551U, "Forward", "temppkt->n1= %d.\n", __nesc_ntoh_uint16(temppkt->n1.nxdata));
          sim_log_debug(552U, "Forward", "temppkt->n2= %d.\n", __nesc_ntoh_uint16(temppkt->n2.nxdata));
          sim_log_debug(553U, "Forward", "temppkt->n3= %d.\n", __nesc_ntoh_uint16(temppkt->n3.nxdata));
          sim_log_debug(554U, "Forward", "temppkt->n4= %d.\n", __nesc_ntoh_uint16(temppkt->n4.nxdata));
          sim_log_debug(555U, "Forward", "temppkt->n5= %d.\n", __nesc_ntoh_uint16(temppkt->n5.nxdata));
          sim_log_debug(556U, "Forward", "temppkt->n6= %d.\n", __nesc_ntoh_uint16(temppkt->n6.nxdata));

          sim_log_debug(557U, "Forward", "m43-9= %f.\n", NetworkC$m[sim_node()]);
          sim_log_debug(558U, "Forward", "n43-9= %f.\n", NetworkC$n[sim_node()]);
          sim_log_debug(559U, "Forward", "a43-9= %d.\n", __nesc_ntoh_uint16(temppkt->a.nxdata));
          sim_log_debug(560U, "Forward", "b43-9= %d.\n", __nesc_ntoh_uint16(temppkt->b.nxdata));

          __nesc_hton_uint16(temppkt->nodeid.nxdata, TOS_NODE_ID);
          __nesc_hton_uint16(temppkt->sourceid.nxdata, __nesc_ntoh_uint16(btrpkt->sourceid.nxdata));
          __nesc_hton_uint16(temppkt->count.nxdata, __nesc_ntoh_uint16(btrpkt->count.nxdata));
          if (!NetworkC$busy[sim_node()]) {
              if (NetworkC$AMSend$send(AM_BROADCAST_ADDR, &NetworkC$pkt[sim_node()], sizeof(NetworkMsg )) == SUCCESS) {
                  NetworkC$busy[sim_node()] = TRUE;
                }
            }
        }


      if (TOS_NODE_ID == 10) {
          sim_log_debug(561U, "Forward", "r112310= %d.\n", NetworkC$r112310[sim_node()]);
          sim_log_debug(562U, "Forward", "r1110= %d.\n", NetworkC$r1110[sim_node()]);
          sim_log_debug(563U, "Forward", "r2310= %d.\n", NetworkC$r2310[sim_node()]);
          sim_log_debug(564U, "Forward", "s10[0]= %f.\n", NetworkC$s10[sim_node()][0]);
          sim_log_debug(565U, "Forward", "s10[1]= %f.\n", NetworkC$s10[sim_node()][1]);
          sim_log_debug(566U, "Forward", "s10[2]= %f.\n", NetworkC$s10[sim_node()][2]);
          sim_log_debug(567U, "Forward", "s10[3]= %f.\n", NetworkC$s10[sim_node()][3]);

          if (__nesc_ntoh_uint16(btrpkt->nodeid.nxdata) == 11) {
              NetworkMsg *temppkt = (NetworkMsg *)NetworkC$Packet$getPayload(&NetworkC$pkt[sim_node()], sizeof(NetworkMsg ));

#line 2478
              NetworkC$ssbm(btrpkt);
              NetworkC$wa[sim_node()] = NetworkC$m[sim_node()] * 10000;
              NetworkC$wb[sim_node()] = NetworkC$n[sim_node()] * 10000;

              NetworkC$ws1[sim_node()] = NetworkC$weishu(NetworkC$wa[sim_node()]);
              NetworkC$ws2[sim_node()] = NetworkC$weishu(NetworkC$wb[sim_node()]);
              sim_log_debug(568U, "Forward", "ws1= %d.\n", NetworkC$ws1[sim_node()]);
              sim_log_debug(569U, "Forward", "ws2= %d.\n", NetworkC$ws2[sim_node()]);
              while (NetworkC$ws1[sim_node()] == NetworkC$ws2[sim_node()] && NetworkC$wa[sim_node()] / 1000 == NetworkC$wb[sim_node()] / 1000) {

                  if ((__nesc_ntoh_uint16(btrpkt->n6.nxdata) == 100 && __nesc_ntoh_uint16(btrpkt->n5.nxdata) != 100 && __nesc_ntoh_uint16(btrpkt->n4.nxdata) != 100 && __nesc_ntoh_uint16(btrpkt->n3.nxdata) != 100 && __nesc_ntoh_uint16(btrpkt->n2.nxdata) != 100 && __nesc_ntoh_uint16(btrpkt->n1.nxdata) != 100) || (__nesc_ntoh_uint16(btrpkt->n6.nxdata) == 100 && NetworkC$flag5[sim_node()] != 0)) {
                      __nesc_hton_uint16(temppkt->n6.nxdata, NetworkC$wa[sim_node()] / 1000);
                      NetworkC$flag6[sim_node()] = 1;
                      sim_log_debug(570U, "Forward", "btrpkt->n1= %d.\n", __nesc_ntoh_uint16(btrpkt->n1.nxdata));
                      sim_log_debug(571U, "Forward", "btrpkt->n2= %d.\n", __nesc_ntoh_uint16(btrpkt->n2.nxdata));
                      sim_log_debug(572U, "Forward", "btrpkt->n3= %d.\n", __nesc_ntoh_uint16(btrpkt->n3.nxdata));
                      sim_log_debug(573U, "Forward", "btrpkt->n4= %d.\n", __nesc_ntoh_uint16(btrpkt->n4.nxdata));
                      sim_log_debug(574U, "Forward", "btrpkt->n5= %d.\n", __nesc_ntoh_uint16(btrpkt->n5.nxdata));
                      sim_log_debug(575U, "Forward", "btrpkt->n6= %d.\n", __nesc_ntoh_uint16(btrpkt->n6.nxdata));
                      sim_log_debug(576U, "Forward", "temppkt6= %d.\n", __nesc_ntoh_uint16(temppkt->n6.nxdata));
                    }
                  else {
#line 2499
                    if ((__nesc_ntoh_uint16(btrpkt->n5.nxdata) == 100 && __nesc_ntoh_uint16(btrpkt->n4.nxdata) != 100 && __nesc_ntoh_uint16(btrpkt->n3.nxdata) != 100 && __nesc_ntoh_uint16(btrpkt->n2.nxdata) != 100 && __nesc_ntoh_uint16(btrpkt->n1.nxdata) != 100) || (__nesc_ntoh_uint16(btrpkt->n5.nxdata) == 100 && NetworkC$flag4[sim_node()] != 0)) {
                        __nesc_hton_uint16(temppkt->n5.nxdata, NetworkC$wa[sim_node()] / 1000);
                        NetworkC$flag5[sim_node()] = 1;
                        sim_log_debug(577U, "Forward", "temppkt5= %d.\n", __nesc_ntoh_uint16(temppkt->n5.nxdata));
                      }
                    else {
#line 2504
                      if ((__nesc_ntoh_uint16(btrpkt->n4.nxdata) == 100 && __nesc_ntoh_uint16(btrpkt->n3.nxdata) != 100 && __nesc_ntoh_uint16(btrpkt->n2.nxdata) != 100 && __nesc_ntoh_uint16(btrpkt->n1.nxdata) != 100) || (__nesc_ntoh_uint16(btrpkt->n4.nxdata) == 100 && NetworkC$flag3[sim_node()] != 0)) {
                          __nesc_hton_uint16(temppkt->n4.nxdata, NetworkC$wa[sim_node()] / 1000);
                          NetworkC$flag4[sim_node()] = 1;
                          sim_log_debug(578U, "Forward", "temppkt4= %d.\n", __nesc_ntoh_uint16(temppkt->n4.nxdata));
                        }
                      else {
#line 2509
                        if ((__nesc_ntoh_uint16(btrpkt->n3.nxdata) == 100 && __nesc_ntoh_uint16(btrpkt->n2.nxdata) != 100 && __nesc_ntoh_uint16(btrpkt->n1.nxdata) != 100) || (__nesc_ntoh_uint16(btrpkt->n3.nxdata) == 100 && NetworkC$flag2[sim_node()] != 0)) {
                            __nesc_hton_uint16(temppkt->n3.nxdata, NetworkC$wa[sim_node()] / 1000);
                            NetworkC$flag3[sim_node()] = 1;
                            sim_log_debug(579U, "Forward", "temppkt3= %d.\n", __nesc_ntoh_uint16(temppkt->n3.nxdata));
                          }
                        else {
#line 2514
                          if ((__nesc_ntoh_uint16(btrpkt->n2.nxdata) == 100 && __nesc_ntoh_uint16(btrpkt->n1.nxdata) != 100) || (__nesc_ntoh_uint16(btrpkt->n2.nxdata) == 100 && NetworkC$flag1[sim_node()] != 0)) {
                              __nesc_hton_uint16(temppkt->n2.nxdata, NetworkC$wa[sim_node()] / 1000);
                              NetworkC$flag2[sim_node()] = 1;
                              sim_log_debug(580U, "Forward", "temppkt2= %d.\n", __nesc_ntoh_uint16(temppkt->n2.nxdata));
                            }
                          else {
                            if (__nesc_ntoh_uint16(btrpkt->n1.nxdata) == 100) {
                                __nesc_hton_uint16(temppkt->n1.nxdata, NetworkC$wa[sim_node()] / 1000);
                                NetworkC$flag1[sim_node()] = 1;
                                sim_log_debug(581U, "Forward", "temppkt1= %d.\n", __nesc_ntoh_uint16(temppkt->n1.nxdata));
                              }
                            }
                          }
                        }
                      }
                    }
#line 2526
                  NetworkC$wa[sim_node()] = (NetworkC$wa[sim_node()] - NetworkC$wa[sim_node()] / 1000 * 1000) * 10;
                  NetworkC$wb[sim_node()] = (NetworkC$wb[sim_node()] - NetworkC$wb[sim_node()] / 1000 * 1000) * 10;
                  sim_log_debug(582U, "Forward", "wa1= %d.\n", NetworkC$wa[sim_node()]);
                  sim_log_debug(583U, "Forward", "wb1= %d.\n", NetworkC$wb[sim_node()]);

                  NetworkC$ws1[sim_node()] = NetworkC$weishu(NetworkC$wa[sim_node()]);
                  NetworkC$ws2[sim_node()] = NetworkC$weishu(NetworkC$wb[sim_node()]);
                  NetworkC$flag[sim_node()] = 1;
                }

              NetworkC$wa2[sim_node()] = (float )NetworkC$wa[sim_node()] / 10000;
              NetworkC$wb2[sim_node()] = (float )NetworkC$wb[sim_node()] / 10000;

              sim_log_debug(584U, "Forward", "wa2= %f.\n", NetworkC$wa2[sim_node()]);
              sim_log_debug(585U, "Forward", "wb2= %f.\n", NetworkC$wb2[sim_node()]);

              __nesc_hton_uint16(temppkt->a.nxdata, (int )(NetworkC$wa2[sim_node()] * NetworkC$z[sim_node()]));
              __nesc_hton_uint16(temppkt->b.nxdata, (int )(NetworkC$wb2[sim_node()] * NetworkC$z[sim_node()]));
              if (NetworkC$flag[sim_node()] == 0) {
                  __nesc_hton_uint16(temppkt->n1.nxdata, __nesc_ntoh_uint16(btrpkt->n1.nxdata));
                  __nesc_hton_uint16(temppkt->n2.nxdata, __nesc_ntoh_uint16(btrpkt->n2.nxdata));
                  __nesc_hton_uint16(temppkt->n3.nxdata, __nesc_ntoh_uint16(btrpkt->n3.nxdata));
                  __nesc_hton_uint16(temppkt->n4.nxdata, __nesc_ntoh_uint16(btrpkt->n4.nxdata));
                  __nesc_hton_uint16(temppkt->n5.nxdata, __nesc_ntoh_uint16(btrpkt->n5.nxdata));
                  __nesc_hton_uint16(temppkt->n6.nxdata, __nesc_ntoh_uint16(btrpkt->n6.nxdata));
                }
              else 
#line 2551
                {
                  NetworkC$pdflag(&NetworkC$flag[sim_node()], &NetworkC$flag1[sim_node()], &NetworkC$flag2[sim_node()], &NetworkC$flag3[sim_node()], &NetworkC$flag4[sim_node()], &NetworkC$flag5[sim_node()], &NetworkC$flag6[sim_node()], btrpkt, temppkt);
                }
              sim_log_debug(586U, "Forward", "temppkt->n1= %d.\n", __nesc_ntoh_uint16(temppkt->n1.nxdata));
              sim_log_debug(587U, "Forward", "temppkt->n2= %d.\n", __nesc_ntoh_uint16(temppkt->n2.nxdata));
              sim_log_debug(588U, "Forward", "temppkt->n3= %d.\n", __nesc_ntoh_uint16(temppkt->n3.nxdata));
              sim_log_debug(589U, "Forward", "temppkt->n4= %d.\n", __nesc_ntoh_uint16(temppkt->n4.nxdata));
              sim_log_debug(590U, "Forward", "temppkt->n5= %d.\n", __nesc_ntoh_uint16(temppkt->n5.nxdata));
              sim_log_debug(591U, "Forward", "temppkt->n6= %d.\n", __nesc_ntoh_uint16(temppkt->n6.nxdata));

              sim_log_debug(592U, "Forward", "m11-10= %f.\n", NetworkC$m[sim_node()]);
              sim_log_debug(593U, "Forward", "n11-10= %f.\n", NetworkC$n[sim_node()]);
              sim_log_debug(594U, "Forward", "a11-10= %d.\n", __nesc_ntoh_uint16(temppkt->a.nxdata));
              sim_log_debug(595U, "Forward", "b11-10= %d.\n", __nesc_ntoh_uint16(temppkt->b.nxdata));

              __nesc_hton_uint16(temppkt->nodeid.nxdata, TOS_NODE_ID);
              __nesc_hton_uint16(temppkt->sourceid.nxdata, __nesc_ntoh_uint16(btrpkt->sourceid.nxdata));
              __nesc_hton_uint16(temppkt->count.nxdata, __nesc_ntoh_uint16(btrpkt->count.nxdata));
              if (!NetworkC$busy[sim_node()]) {
                  if (NetworkC$AMSend$send(AM_BROADCAST_ADDR, &NetworkC$pkt[sim_node()], sizeof(NetworkMsg )) == SUCCESS) {
                      NetworkC$busy[sim_node()] = TRUE;
                    }
                }
            }
          if (__nesc_ntoh_uint16(btrpkt->nodeid.nxdata) == 23) {
              NetworkMsg *temppkt = (NetworkMsg *)NetworkC$Packet$getPayload(&NetworkC$pkt[sim_node()], sizeof(NetworkMsg ));

#line 2577
              NetworkC$ssbm(btrpkt);
              NetworkC$wa[sim_node()] = NetworkC$m[sim_node()] * 10000;
              NetworkC$wb[sim_node()] = NetworkC$n[sim_node()] * 10000;

              NetworkC$ws1[sim_node()] = NetworkC$weishu(NetworkC$wa[sim_node()]);
              NetworkC$ws2[sim_node()] = NetworkC$weishu(NetworkC$wb[sim_node()]);
              sim_log_debug(596U, "Forward", "ws1= %d.\n", NetworkC$ws1[sim_node()]);
              sim_log_debug(597U, "Forward", "ws2= %d.\n", NetworkC$ws2[sim_node()]);
              while (NetworkC$ws1[sim_node()] == NetworkC$ws2[sim_node()] && NetworkC$wa[sim_node()] / 1000 == NetworkC$wb[sim_node()] / 1000) {

                  if ((__nesc_ntoh_uint16(btrpkt->n6.nxdata) == 100 && __nesc_ntoh_uint16(btrpkt->n5.nxdata) != 100 && __nesc_ntoh_uint16(btrpkt->n4.nxdata) != 100 && __nesc_ntoh_uint16(btrpkt->n3.nxdata) != 100 && __nesc_ntoh_uint16(btrpkt->n2.nxdata) != 100 && __nesc_ntoh_uint16(btrpkt->n1.nxdata) != 100) || (__nesc_ntoh_uint16(btrpkt->n6.nxdata) == 100 && NetworkC$flag5[sim_node()] != 0)) {
                      __nesc_hton_uint16(temppkt->n6.nxdata, NetworkC$wa[sim_node()] / 1000);
                      NetworkC$flag6[sim_node()] = 1;
                      sim_log_debug(598U, "Forward", "btrpkt->n1= %d.\n", __nesc_ntoh_uint16(btrpkt->n1.nxdata));
                      sim_log_debug(599U, "Forward", "btrpkt->n2= %d.\n", __nesc_ntoh_uint16(btrpkt->n2.nxdata));
                      sim_log_debug(600U, "Forward", "btrpkt->n3= %d.\n", __nesc_ntoh_uint16(btrpkt->n3.nxdata));
                      sim_log_debug(601U, "Forward", "btrpkt->n4= %d.\n", __nesc_ntoh_uint16(btrpkt->n4.nxdata));
                      sim_log_debug(602U, "Forward", "btrpkt->n5= %d.\n", __nesc_ntoh_uint16(btrpkt->n5.nxdata));
                      sim_log_debug(603U, "Forward", "btrpkt->n6= %d.\n", __nesc_ntoh_uint16(btrpkt->n6.nxdata));
                      sim_log_debug(604U, "Forward", "temppkt6= %d.\n", __nesc_ntoh_uint16(temppkt->n6.nxdata));
                    }
                  else {
#line 2598
                    if ((__nesc_ntoh_uint16(btrpkt->n5.nxdata) == 100 && __nesc_ntoh_uint16(btrpkt->n4.nxdata) != 100 && __nesc_ntoh_uint16(btrpkt->n3.nxdata) != 100 && __nesc_ntoh_uint16(btrpkt->n2.nxdata) != 100 && __nesc_ntoh_uint16(btrpkt->n1.nxdata) != 100) || (__nesc_ntoh_uint16(btrpkt->n5.nxdata) == 100 && NetworkC$flag4[sim_node()] != 0)) {
                        __nesc_hton_uint16(temppkt->n5.nxdata, NetworkC$wa[sim_node()] / 1000);
                        NetworkC$flag5[sim_node()] = 1;
                        sim_log_debug(605U, "Forward", "temppkt5= %d.\n", __nesc_ntoh_uint16(temppkt->n5.nxdata));
                      }
                    else {
#line 2603
                      if ((__nesc_ntoh_uint16(btrpkt->n4.nxdata) == 100 && __nesc_ntoh_uint16(btrpkt->n3.nxdata) != 100 && __nesc_ntoh_uint16(btrpkt->n2.nxdata) != 100 && __nesc_ntoh_uint16(btrpkt->n1.nxdata) != 100) || (__nesc_ntoh_uint16(btrpkt->n4.nxdata) == 100 && NetworkC$flag3[sim_node()] != 0)) {
                          __nesc_hton_uint16(temppkt->n4.nxdata, NetworkC$wa[sim_node()] / 1000);
                          NetworkC$flag4[sim_node()] = 1;
                          sim_log_debug(606U, "Forward", "temppkt4= %d.\n", __nesc_ntoh_uint16(temppkt->n4.nxdata));
                        }
                      else {
#line 2608
                        if ((__nesc_ntoh_uint16(btrpkt->n3.nxdata) == 100 && __nesc_ntoh_uint16(btrpkt->n2.nxdata) != 100 && __nesc_ntoh_uint16(btrpkt->n1.nxdata) != 100) || (__nesc_ntoh_uint16(btrpkt->n3.nxdata) == 100 && NetworkC$flag2[sim_node()] != 0)) {
                            __nesc_hton_uint16(temppkt->n3.nxdata, NetworkC$wa[sim_node()] / 1000);
                            NetworkC$flag3[sim_node()] = 1;
                            sim_log_debug(607U, "Forward", "temppkt3= %d.\n", __nesc_ntoh_uint16(temppkt->n3.nxdata));
                          }
                        else {
#line 2613
                          if ((__nesc_ntoh_uint16(btrpkt->n2.nxdata) == 100 && __nesc_ntoh_uint16(btrpkt->n1.nxdata) != 100) || (__nesc_ntoh_uint16(btrpkt->n2.nxdata) == 100 && NetworkC$flag1[sim_node()] != 0)) {
                              __nesc_hton_uint16(temppkt->n2.nxdata, NetworkC$wa[sim_node()] / 1000);
                              NetworkC$flag2[sim_node()] = 1;
                              sim_log_debug(608U, "Forward", "temppkt2= %d.\n", __nesc_ntoh_uint16(temppkt->n2.nxdata));
                            }
                          else {
                            if (__nesc_ntoh_uint16(btrpkt->n1.nxdata) == 100) {
                                __nesc_hton_uint16(temppkt->n1.nxdata, NetworkC$wa[sim_node()] / 1000);
                                NetworkC$flag1[sim_node()] = 1;
                                sim_log_debug(609U, "Forward", "temppkt1= %d.\n", __nesc_ntoh_uint16(temppkt->n1.nxdata));
                              }
                            }
                          }
                        }
                      }
                    }
#line 2625
                  NetworkC$wa[sim_node()] = (NetworkC$wa[sim_node()] - NetworkC$wa[sim_node()] / 1000 * 1000) * 10;
                  NetworkC$wb[sim_node()] = (NetworkC$wb[sim_node()] - NetworkC$wb[sim_node()] / 1000 * 1000) * 10;
                  sim_log_debug(610U, "Forward", "wa1= %d.\n", NetworkC$wa[sim_node()]);
                  sim_log_debug(611U, "Forward", "wb1= %d.\n", NetworkC$wb[sim_node()]);

                  NetworkC$ws1[sim_node()] = NetworkC$weishu(NetworkC$wa[sim_node()]);
                  NetworkC$ws2[sim_node()] = NetworkC$weishu(NetworkC$wb[sim_node()]);
                  NetworkC$flag[sim_node()] = 1;
                }

              NetworkC$wa2[sim_node()] = (float )NetworkC$wa[sim_node()] / 10000;
              NetworkC$wb2[sim_node()] = (float )NetworkC$wb[sim_node()] / 10000;

              sim_log_debug(612U, "Forward", "wa2= %f.\n", NetworkC$wa2[sim_node()]);
              sim_log_debug(613U, "Forward", "wb2= %f.\n", NetworkC$wb2[sim_node()]);

              __nesc_hton_uint16(temppkt->a.nxdata, (int )(NetworkC$wa2[sim_node()] * NetworkC$z[sim_node()]));
              __nesc_hton_uint16(temppkt->b.nxdata, (int )(NetworkC$wb2[sim_node()] * NetworkC$z[sim_node()]));
              if (NetworkC$flag[sim_node()] == 0) {
                  __nesc_hton_uint16(temppkt->n1.nxdata, __nesc_ntoh_uint16(btrpkt->n1.nxdata));
                  __nesc_hton_uint16(temppkt->n2.nxdata, __nesc_ntoh_uint16(btrpkt->n2.nxdata));
                  __nesc_hton_uint16(temppkt->n3.nxdata, __nesc_ntoh_uint16(btrpkt->n3.nxdata));
                  __nesc_hton_uint16(temppkt->n4.nxdata, __nesc_ntoh_uint16(btrpkt->n4.nxdata));
                  __nesc_hton_uint16(temppkt->n5.nxdata, __nesc_ntoh_uint16(btrpkt->n5.nxdata));
                  __nesc_hton_uint16(temppkt->n6.nxdata, __nesc_ntoh_uint16(btrpkt->n6.nxdata));
                }
              else 
#line 2650
                {
                  NetworkC$pdflag(&NetworkC$flag[sim_node()], &NetworkC$flag1[sim_node()], &NetworkC$flag2[sim_node()], &NetworkC$flag3[sim_node()], &NetworkC$flag4[sim_node()], &NetworkC$flag5[sim_node()], &NetworkC$flag6[sim_node()], btrpkt, temppkt);
                }
              sim_log_debug(614U, "Forward", "temppkt->n1= %d.\n", __nesc_ntoh_uint16(temppkt->n1.nxdata));
              sim_log_debug(615U, "Forward", "temppkt->n2= %d.\n", __nesc_ntoh_uint16(temppkt->n2.nxdata));
              sim_log_debug(616U, "Forward", "temppkt->n3= %d.\n", __nesc_ntoh_uint16(temppkt->n3.nxdata));
              sim_log_debug(617U, "Forward", "temppkt->n4= %d.\n", __nesc_ntoh_uint16(temppkt->n4.nxdata));
              sim_log_debug(618U, "Forward", "temppkt->n5= %d.\n", __nesc_ntoh_uint16(temppkt->n5.nxdata));
              sim_log_debug(619U, "Forward", "temppkt->n6= %d.\n", __nesc_ntoh_uint16(temppkt->n6.nxdata));

              sim_log_debug(620U, "Forward", "m23-10= %f.\n", NetworkC$m[sim_node()]);
              sim_log_debug(621U, "Forward", "n23-10= %f.\n", NetworkC$n[sim_node()]);
              sim_log_debug(622U, "Forward", "a23-10= %d.\n", __nesc_ntoh_uint16(temppkt->a.nxdata));
              sim_log_debug(623U, "Forward", "b23-10= %d.\n", __nesc_ntoh_uint16(temppkt->b.nxdata));

              __nesc_hton_uint16(temppkt->nodeid.nxdata, TOS_NODE_ID);
              __nesc_hton_uint16(temppkt->sourceid.nxdata, __nesc_ntoh_uint16(btrpkt->sourceid.nxdata));
              __nesc_hton_uint16(temppkt->count.nxdata, __nesc_ntoh_uint16(btrpkt->count.nxdata));
              if (!NetworkC$busy[sim_node()]) {
                  if (NetworkC$AMSend$send(AM_BROADCAST_ADDR, &NetworkC$pkt[sim_node()], sizeof(NetworkMsg )) == SUCCESS) {
                      NetworkC$busy[sim_node()] = TRUE;
                    }
                }
            }
        }


      if (TOS_NODE_ID == 11 && __nesc_ntoh_uint16(btrpkt->nodeid.nxdata) == 12) {
          NetworkMsg *temppkt = (NetworkMsg *)NetworkC$Packet$getPayload(&NetworkC$pkt[sim_node()], sizeof(NetworkMsg ));

#line 2679
          sim_log_debug(624U, "Forward", "r1211= %d.\n", NetworkC$r1211[sim_node()]);
          NetworkC$ssbm(btrpkt);
          NetworkC$wa[sim_node()] = NetworkC$m[sim_node()] * 10000;
          NetworkC$wb[sim_node()] = NetworkC$n[sim_node()] * 10000;

          NetworkC$ws1[sim_node()] = NetworkC$weishu(NetworkC$wa[sim_node()]);
          NetworkC$ws2[sim_node()] = NetworkC$weishu(NetworkC$wb[sim_node()]);
          sim_log_debug(625U, "Forward", "ws1= %d.\n", NetworkC$ws1[sim_node()]);
          sim_log_debug(626U, "Forward", "ws2= %d.\n", NetworkC$ws2[sim_node()]);
          while (NetworkC$ws1[sim_node()] == NetworkC$ws2[sim_node()] && NetworkC$wa[sim_node()] / 1000 == NetworkC$wb[sim_node()] / 1000) {

              if ((__nesc_ntoh_uint16(btrpkt->n6.nxdata) == 100 && __nesc_ntoh_uint16(btrpkt->n5.nxdata) != 100 && __nesc_ntoh_uint16(btrpkt->n4.nxdata) != 100 && __nesc_ntoh_uint16(btrpkt->n3.nxdata) != 100 && __nesc_ntoh_uint16(btrpkt->n2.nxdata) != 100 && __nesc_ntoh_uint16(btrpkt->n1.nxdata) != 100) || (__nesc_ntoh_uint16(btrpkt->n6.nxdata) == 100 && NetworkC$flag5[sim_node()] != 0)) {
                  __nesc_hton_uint16(temppkt->n6.nxdata, NetworkC$wa[sim_node()] / 1000);
                  NetworkC$flag6[sim_node()] = 1;
                  sim_log_debug(627U, "Forward", "btrpkt->n1= %d.\n", __nesc_ntoh_uint16(btrpkt->n1.nxdata));
                  sim_log_debug(628U, "Forward", "btrpkt->n2= %d.\n", __nesc_ntoh_uint16(btrpkt->n2.nxdata));
                  sim_log_debug(629U, "Forward", "btrpkt->n3= %d.\n", __nesc_ntoh_uint16(btrpkt->n3.nxdata));
                  sim_log_debug(630U, "Forward", "btrpkt->n4= %d.\n", __nesc_ntoh_uint16(btrpkt->n4.nxdata));
                  sim_log_debug(631U, "Forward", "btrpkt->n5= %d.\n", __nesc_ntoh_uint16(btrpkt->n5.nxdata));
                  sim_log_debug(632U, "Forward", "btrpkt->n6= %d.\n", __nesc_ntoh_uint16(btrpkt->n6.nxdata));
                  sim_log_debug(633U, "Forward", "temppkt6= %d.\n", __nesc_ntoh_uint16(temppkt->n6.nxdata));
                }
              else {
#line 2701
                if ((__nesc_ntoh_uint16(btrpkt->n5.nxdata) == 100 && __nesc_ntoh_uint16(btrpkt->n4.nxdata) != 100 && __nesc_ntoh_uint16(btrpkt->n3.nxdata) != 100 && __nesc_ntoh_uint16(btrpkt->n2.nxdata) != 100 && __nesc_ntoh_uint16(btrpkt->n1.nxdata) != 100) || (__nesc_ntoh_uint16(btrpkt->n5.nxdata) == 100 && NetworkC$flag4[sim_node()] != 0)) {
                    __nesc_hton_uint16(temppkt->n5.nxdata, NetworkC$wa[sim_node()] / 1000);
                    NetworkC$flag5[sim_node()] = 1;
                    sim_log_debug(634U, "Forward", "temppkt5= %d.\n", __nesc_ntoh_uint16(temppkt->n5.nxdata));
                  }
                else {
#line 2706
                  if ((__nesc_ntoh_uint16(btrpkt->n4.nxdata) == 100 && __nesc_ntoh_uint16(btrpkt->n3.nxdata) != 100 && __nesc_ntoh_uint16(btrpkt->n2.nxdata) != 100 && __nesc_ntoh_uint16(btrpkt->n1.nxdata) != 100) || (__nesc_ntoh_uint16(btrpkt->n4.nxdata) == 100 && NetworkC$flag3[sim_node()] != 0)) {
                      __nesc_hton_uint16(temppkt->n4.nxdata, NetworkC$wa[sim_node()] / 1000);
                      NetworkC$flag4[sim_node()] = 1;
                      sim_log_debug(635U, "Forward", "temppkt4= %d.\n", __nesc_ntoh_uint16(temppkt->n4.nxdata));
                    }
                  else {
#line 2711
                    if ((__nesc_ntoh_uint16(btrpkt->n3.nxdata) == 100 && __nesc_ntoh_uint16(btrpkt->n2.nxdata) != 100 && __nesc_ntoh_uint16(btrpkt->n1.nxdata) != 100) || (__nesc_ntoh_uint16(btrpkt->n3.nxdata) == 100 && NetworkC$flag2[sim_node()] != 0)) {
                        __nesc_hton_uint16(temppkt->n3.nxdata, NetworkC$wa[sim_node()] / 1000);
                        NetworkC$flag3[sim_node()] = 1;
                        sim_log_debug(636U, "Forward", "temppkt3= %d.\n", __nesc_ntoh_uint16(temppkt->n3.nxdata));
                      }
                    else {
#line 2716
                      if ((__nesc_ntoh_uint16(btrpkt->n2.nxdata) == 100 && __nesc_ntoh_uint16(btrpkt->n1.nxdata) != 100) || (__nesc_ntoh_uint16(btrpkt->n2.nxdata) == 100 && NetworkC$flag1[sim_node()] != 0)) {
                          __nesc_hton_uint16(temppkt->n2.nxdata, NetworkC$wa[sim_node()] / 1000);
                          NetworkC$flag2[sim_node()] = 1;
                          sim_log_debug(637U, "Forward", "temppkt2= %d.\n", __nesc_ntoh_uint16(temppkt->n2.nxdata));
                        }
                      else {
                        if (__nesc_ntoh_uint16(btrpkt->n1.nxdata) == 100) {
                            __nesc_hton_uint16(temppkt->n1.nxdata, NetworkC$wa[sim_node()] / 1000);
                            NetworkC$flag1[sim_node()] = 1;
                            sim_log_debug(638U, "Forward", "temppkt1= %d.\n", __nesc_ntoh_uint16(temppkt->n1.nxdata));
                          }
                        }
                      }
                    }
                  }
                }
#line 2728
              NetworkC$wa[sim_node()] = (NetworkC$wa[sim_node()] - NetworkC$wa[sim_node()] / 1000 * 1000) * 10;
              NetworkC$wb[sim_node()] = (NetworkC$wb[sim_node()] - NetworkC$wb[sim_node()] / 1000 * 1000) * 10;
              sim_log_debug(639U, "Forward", "wa1= %d.\n", NetworkC$wa[sim_node()]);
              sim_log_debug(640U, "Forward", "wb1= %d.\n", NetworkC$wb[sim_node()]);

              NetworkC$ws1[sim_node()] = NetworkC$weishu(NetworkC$wa[sim_node()]);
              NetworkC$ws2[sim_node()] = NetworkC$weishu(NetworkC$wb[sim_node()]);
              NetworkC$flag[sim_node()] = 1;
            }

          NetworkC$wa2[sim_node()] = (float )NetworkC$wa[sim_node()] / 10000;
          NetworkC$wb2[sim_node()] = (float )NetworkC$wb[sim_node()] / 10000;

          sim_log_debug(641U, "Forward", "wa2= %f.\n", NetworkC$wa2[sim_node()]);
          sim_log_debug(642U, "Forward", "wb2= %f.\n", NetworkC$wb2[sim_node()]);

          __nesc_hton_uint16(temppkt->a.nxdata, (int )(NetworkC$wa2[sim_node()] * NetworkC$z[sim_node()]));
          __nesc_hton_uint16(temppkt->b.nxdata, (int )(NetworkC$wb2[sim_node()] * NetworkC$z[sim_node()]));
          if (NetworkC$flag[sim_node()] == 0) {
              __nesc_hton_uint16(temppkt->n1.nxdata, __nesc_ntoh_uint16(btrpkt->n1.nxdata));
              __nesc_hton_uint16(temppkt->n2.nxdata, __nesc_ntoh_uint16(btrpkt->n2.nxdata));
              __nesc_hton_uint16(temppkt->n3.nxdata, __nesc_ntoh_uint16(btrpkt->n3.nxdata));
              __nesc_hton_uint16(temppkt->n4.nxdata, __nesc_ntoh_uint16(btrpkt->n4.nxdata));
              __nesc_hton_uint16(temppkt->n5.nxdata, __nesc_ntoh_uint16(btrpkt->n5.nxdata));
              __nesc_hton_uint16(temppkt->n6.nxdata, __nesc_ntoh_uint16(btrpkt->n6.nxdata));
            }
          else 
#line 2753
            {
              NetworkC$pdflag(&NetworkC$flag[sim_node()], &NetworkC$flag1[sim_node()], &NetworkC$flag2[sim_node()], &NetworkC$flag3[sim_node()], &NetworkC$flag4[sim_node()], &NetworkC$flag5[sim_node()], &NetworkC$flag6[sim_node()], btrpkt, temppkt);
            }
          sim_log_debug(643U, "Forward", "temppkt->n1= %d.\n", __nesc_ntoh_uint16(temppkt->n1.nxdata));
          sim_log_debug(644U, "Forward", "temppkt->n2= %d.\n", __nesc_ntoh_uint16(temppkt->n2.nxdata));
          sim_log_debug(645U, "Forward", "temppkt->n3= %d.\n", __nesc_ntoh_uint16(temppkt->n3.nxdata));
          sim_log_debug(646U, "Forward", "temppkt->n4= %d.\n", __nesc_ntoh_uint16(temppkt->n4.nxdata));
          sim_log_debug(647U, "Forward", "temppkt->n5= %d.\n", __nesc_ntoh_uint16(temppkt->n5.nxdata));
          sim_log_debug(648U, "Forward", "temppkt->n6= %d.\n", __nesc_ntoh_uint16(temppkt->n6.nxdata));

          sim_log_debug(649U, "Forward", "m12-11= %f.\n", NetworkC$m[sim_node()]);
          sim_log_debug(650U, "Forward", "n12-11= %f.\n", NetworkC$n[sim_node()]);
          sim_log_debug(651U, "Forward", "a12-11= %d.\n", __nesc_ntoh_uint16(temppkt->a.nxdata));
          sim_log_debug(652U, "Forward", "b12-11= %d.\n", __nesc_ntoh_uint16(temppkt->b.nxdata));

          __nesc_hton_uint16(temppkt->nodeid.nxdata, TOS_NODE_ID);
          __nesc_hton_uint16(temppkt->sourceid.nxdata, __nesc_ntoh_uint16(btrpkt->sourceid.nxdata));
          __nesc_hton_uint16(temppkt->count.nxdata, __nesc_ntoh_uint16(btrpkt->count.nxdata));
          if (!NetworkC$busy[sim_node()]) {
              if (NetworkC$AMSend$send(AM_BROADCAST_ADDR, &NetworkC$pkt[sim_node()], sizeof(NetworkMsg )) == SUCCESS) {
                  NetworkC$busy[sim_node()] = TRUE;
                }
            }
        }


      if (TOS_NODE_ID == 12) {
          sim_log_debug(653U, "Forward", "r132512= %d.\n", NetworkC$r132512[sim_node()]);
          sim_log_debug(654U, "Forward", "r1312= %d.\n", NetworkC$r1312[sim_node()]);
          sim_log_debug(655U, "Forward", "r2512= %d.\n", NetworkC$r2512[sim_node()]);
          sim_log_debug(656U, "Forward", "s12[0]= %f.\n", NetworkC$s12[sim_node()][0]);
          sim_log_debug(657U, "Forward", "s12[1]= %f.\n", NetworkC$s12[sim_node()][1]);
          sim_log_debug(658U, "Forward", "s12[2]= %f.\n", NetworkC$s12[sim_node()][2]);
          sim_log_debug(659U, "Forward", "s12[3]= %f.\n", NetworkC$s12[sim_node()][3]);

          if (__nesc_ntoh_uint16(btrpkt->nodeid.nxdata) == 13) {
              NetworkMsg *temppkt = (NetworkMsg *)NetworkC$Packet$getPayload(&NetworkC$pkt[sim_node()], sizeof(NetworkMsg ));

#line 2790
              NetworkC$ssbm(btrpkt);
              NetworkC$wa[sim_node()] = NetworkC$m[sim_node()] * 10000;
              NetworkC$wb[sim_node()] = NetworkC$n[sim_node()] * 10000;

              NetworkC$ws1[sim_node()] = NetworkC$weishu(NetworkC$wa[sim_node()]);
              NetworkC$ws2[sim_node()] = NetworkC$weishu(NetworkC$wb[sim_node()]);
              sim_log_debug(660U, "Forward", "ws1= %d.\n", NetworkC$ws1[sim_node()]);
              sim_log_debug(661U, "Forward", "ws2= %d.\n", NetworkC$ws2[sim_node()]);
              while (NetworkC$ws1[sim_node()] == NetworkC$ws2[sim_node()] && NetworkC$wa[sim_node()] / 1000 == NetworkC$wb[sim_node()] / 1000) {

                  if ((__nesc_ntoh_uint16(btrpkt->n6.nxdata) == 100 && __nesc_ntoh_uint16(btrpkt->n5.nxdata) != 100 && __nesc_ntoh_uint16(btrpkt->n4.nxdata) != 100 && __nesc_ntoh_uint16(btrpkt->n3.nxdata) != 100 && __nesc_ntoh_uint16(btrpkt->n2.nxdata) != 100 && __nesc_ntoh_uint16(btrpkt->n1.nxdata) != 100) || (__nesc_ntoh_uint16(btrpkt->n6.nxdata) == 100 && NetworkC$flag5[sim_node()] != 0)) {
                      __nesc_hton_uint16(temppkt->n6.nxdata, NetworkC$wa[sim_node()] / 1000);
                      NetworkC$flag6[sim_node()] = 1;
                      sim_log_debug(662U, "Forward", "btrpkt->n1= %d.\n", __nesc_ntoh_uint16(btrpkt->n1.nxdata));
                      sim_log_debug(663U, "Forward", "btrpkt->n2= %d.\n", __nesc_ntoh_uint16(btrpkt->n2.nxdata));
                      sim_log_debug(664U, "Forward", "btrpkt->n3= %d.\n", __nesc_ntoh_uint16(btrpkt->n3.nxdata));
                      sim_log_debug(665U, "Forward", "btrpkt->n4= %d.\n", __nesc_ntoh_uint16(btrpkt->n4.nxdata));
                      sim_log_debug(666U, "Forward", "btrpkt->n5= %d.\n", __nesc_ntoh_uint16(btrpkt->n5.nxdata));
                      sim_log_debug(667U, "Forward", "btrpkt->n6= %d.\n", __nesc_ntoh_uint16(btrpkt->n6.nxdata));
                      sim_log_debug(668U, "Forward", "temppkt6= %d.\n", __nesc_ntoh_uint16(temppkt->n6.nxdata));
                    }
                  else {
#line 2811
                    if ((__nesc_ntoh_uint16(btrpkt->n5.nxdata) == 100 && __nesc_ntoh_uint16(btrpkt->n4.nxdata) != 100 && __nesc_ntoh_uint16(btrpkt->n3.nxdata) != 100 && __nesc_ntoh_uint16(btrpkt->n2.nxdata) != 100 && __nesc_ntoh_uint16(btrpkt->n1.nxdata) != 100) || (__nesc_ntoh_uint16(btrpkt->n5.nxdata) == 100 && NetworkC$flag4[sim_node()] != 0)) {
                        __nesc_hton_uint16(temppkt->n5.nxdata, NetworkC$wa[sim_node()] / 1000);
                        NetworkC$flag5[sim_node()] = 1;
                        sim_log_debug(669U, "Forward", "temppkt5= %d.\n", __nesc_ntoh_uint16(temppkt->n5.nxdata));
                      }
                    else {
#line 2816
                      if ((__nesc_ntoh_uint16(btrpkt->n4.nxdata) == 100 && __nesc_ntoh_uint16(btrpkt->n3.nxdata) != 100 && __nesc_ntoh_uint16(btrpkt->n2.nxdata) != 100 && __nesc_ntoh_uint16(btrpkt->n1.nxdata) != 100) || (__nesc_ntoh_uint16(btrpkt->n4.nxdata) == 100 && NetworkC$flag3[sim_node()] != 0)) {
                          __nesc_hton_uint16(temppkt->n4.nxdata, NetworkC$wa[sim_node()] / 1000);
                          NetworkC$flag4[sim_node()] = 1;
                          sim_log_debug(670U, "Forward", "temppkt4= %d.\n", __nesc_ntoh_uint16(temppkt->n4.nxdata));
                        }
                      else {
#line 2821
                        if ((__nesc_ntoh_uint16(btrpkt->n3.nxdata) == 100 && __nesc_ntoh_uint16(btrpkt->n2.nxdata) != 100 && __nesc_ntoh_uint16(btrpkt->n1.nxdata) != 100) || (__nesc_ntoh_uint16(btrpkt->n3.nxdata) == 100 && NetworkC$flag2[sim_node()] != 0)) {
                            __nesc_hton_uint16(temppkt->n3.nxdata, NetworkC$wa[sim_node()] / 1000);
                            NetworkC$flag3[sim_node()] = 1;
                            sim_log_debug(671U, "Forward", "temppkt3= %d.\n", __nesc_ntoh_uint16(temppkt->n3.nxdata));
                          }
                        else {
#line 2826
                          if ((__nesc_ntoh_uint16(btrpkt->n2.nxdata) == 100 && __nesc_ntoh_uint16(btrpkt->n1.nxdata) != 100) || (__nesc_ntoh_uint16(btrpkt->n2.nxdata) == 100 && NetworkC$flag1[sim_node()] != 0)) {
                              __nesc_hton_uint16(temppkt->n2.nxdata, NetworkC$wa[sim_node()] / 1000);
                              NetworkC$flag2[sim_node()] = 1;
                              sim_log_debug(672U, "Forward", "temppkt2= %d.\n", __nesc_ntoh_uint16(temppkt->n2.nxdata));
                            }
                          else {
                            if (__nesc_ntoh_uint16(btrpkt->n1.nxdata) == 100) {
                                __nesc_hton_uint16(temppkt->n1.nxdata, NetworkC$wa[sim_node()] / 1000);
                                NetworkC$flag1[sim_node()] = 1;
                                sim_log_debug(673U, "Forward", "temppkt1= %d.\n", __nesc_ntoh_uint16(temppkt->n1.nxdata));
                              }
                            }
                          }
                        }
                      }
                    }
#line 2838
                  NetworkC$wa[sim_node()] = (NetworkC$wa[sim_node()] - NetworkC$wa[sim_node()] / 1000 * 1000) * 10;
                  NetworkC$wb[sim_node()] = (NetworkC$wb[sim_node()] - NetworkC$wb[sim_node()] / 1000 * 1000) * 10;
                  sim_log_debug(674U, "Forward", "wa1= %d.\n", NetworkC$wa[sim_node()]);
                  sim_log_debug(675U, "Forward", "wb1= %d.\n", NetworkC$wb[sim_node()]);

                  NetworkC$ws1[sim_node()] = NetworkC$weishu(NetworkC$wa[sim_node()]);
                  NetworkC$ws2[sim_node()] = NetworkC$weishu(NetworkC$wb[sim_node()]);
                  NetworkC$flag[sim_node()] = 1;
                }

              NetworkC$wa2[sim_node()] = (float )NetworkC$wa[sim_node()] / 10000;
              NetworkC$wb2[sim_node()] = (float )NetworkC$wb[sim_node()] / 10000;

              sim_log_debug(676U, "Forward", "wa2= %f.\n", NetworkC$wa2[sim_node()]);
              sim_log_debug(677U, "Forward", "wb2= %f.\n", NetworkC$wb2[sim_node()]);

              __nesc_hton_uint16(temppkt->a.nxdata, (int )(NetworkC$wa2[sim_node()] * NetworkC$z[sim_node()]));
              __nesc_hton_uint16(temppkt->b.nxdata, (int )(NetworkC$wb2[sim_node()] * NetworkC$z[sim_node()]));
              if (NetworkC$flag[sim_node()] == 0) {
                  __nesc_hton_uint16(temppkt->n1.nxdata, __nesc_ntoh_uint16(btrpkt->n1.nxdata));
                  __nesc_hton_uint16(temppkt->n2.nxdata, __nesc_ntoh_uint16(btrpkt->n2.nxdata));
                  __nesc_hton_uint16(temppkt->n3.nxdata, __nesc_ntoh_uint16(btrpkt->n3.nxdata));
                  __nesc_hton_uint16(temppkt->n4.nxdata, __nesc_ntoh_uint16(btrpkt->n4.nxdata));
                  __nesc_hton_uint16(temppkt->n5.nxdata, __nesc_ntoh_uint16(btrpkt->n5.nxdata));
                  __nesc_hton_uint16(temppkt->n6.nxdata, __nesc_ntoh_uint16(btrpkt->n6.nxdata));
                }
              else 
#line 2863
                {
                  NetworkC$pdflag(&NetworkC$flag[sim_node()], &NetworkC$flag1[sim_node()], &NetworkC$flag2[sim_node()], &NetworkC$flag3[sim_node()], &NetworkC$flag4[sim_node()], &NetworkC$flag5[sim_node()], &NetworkC$flag6[sim_node()], btrpkt, temppkt);
                }
              sim_log_debug(678U, "Forward", "temppkt->n1= %d.\n", __nesc_ntoh_uint16(temppkt->n1.nxdata));
              sim_log_debug(679U, "Forward", "temppkt->n2= %d.\n", __nesc_ntoh_uint16(temppkt->n2.nxdata));
              sim_log_debug(680U, "Forward", "temppkt->n3= %d.\n", __nesc_ntoh_uint16(temppkt->n3.nxdata));
              sim_log_debug(681U, "Forward", "temppkt->n4= %d.\n", __nesc_ntoh_uint16(temppkt->n4.nxdata));
              sim_log_debug(682U, "Forward", "temppkt->n5= %d.\n", __nesc_ntoh_uint16(temppkt->n5.nxdata));
              sim_log_debug(683U, "Forward", "temppkt->n6= %d.\n", __nesc_ntoh_uint16(temppkt->n6.nxdata));

              sim_log_debug(684U, "Forward", "m13-12= %f.\n", NetworkC$m[sim_node()]);
              sim_log_debug(685U, "Forward", "n13-12= %f.\n", NetworkC$n[sim_node()]);
              sim_log_debug(686U, "Forward", "a13-12= %d.\n", __nesc_ntoh_uint16(temppkt->a.nxdata));
              sim_log_debug(687U, "Forward", "b13-12= %d.\n", __nesc_ntoh_uint16(temppkt->b.nxdata));

              __nesc_hton_uint16(temppkt->nodeid.nxdata, TOS_NODE_ID);
              __nesc_hton_uint16(temppkt->sourceid.nxdata, __nesc_ntoh_uint16(btrpkt->sourceid.nxdata));
              __nesc_hton_uint16(temppkt->count.nxdata, __nesc_ntoh_uint16(btrpkt->count.nxdata));
              if (!NetworkC$busy[sim_node()]) {
                  if (NetworkC$AMSend$send(AM_BROADCAST_ADDR, &NetworkC$pkt[sim_node()], sizeof(NetworkMsg )) == SUCCESS) {
                      NetworkC$busy[sim_node()] = TRUE;
                    }
                }
            }
          if (__nesc_ntoh_uint16(btrpkt->nodeid.nxdata) == 25) {
              NetworkMsg *temppkt = (NetworkMsg *)NetworkC$Packet$getPayload(&NetworkC$pkt[sim_node()], sizeof(NetworkMsg ));

#line 2889
              NetworkC$ssbm(btrpkt);
              NetworkC$wa[sim_node()] = NetworkC$m[sim_node()] * 10000;
              NetworkC$wb[sim_node()] = NetworkC$n[sim_node()] * 10000;

              NetworkC$ws1[sim_node()] = NetworkC$weishu(NetworkC$wa[sim_node()]);
              NetworkC$ws2[sim_node()] = NetworkC$weishu(NetworkC$wb[sim_node()]);
              sim_log_debug(688U, "Forward", "ws1= %d.\n", NetworkC$ws1[sim_node()]);
              sim_log_debug(689U, "Forward", "ws2= %d.\n", NetworkC$ws2[sim_node()]);
              while (NetworkC$ws1[sim_node()] == NetworkC$ws2[sim_node()] && NetworkC$wa[sim_node()] / 1000 == NetworkC$wb[sim_node()] / 1000) {

                  if ((__nesc_ntoh_uint16(btrpkt->n6.nxdata) == 100 && __nesc_ntoh_uint16(btrpkt->n5.nxdata) != 100 && __nesc_ntoh_uint16(btrpkt->n4.nxdata) != 100 && __nesc_ntoh_uint16(btrpkt->n3.nxdata) != 100 && __nesc_ntoh_uint16(btrpkt->n2.nxdata) != 100 && __nesc_ntoh_uint16(btrpkt->n1.nxdata) != 100) || (__nesc_ntoh_uint16(btrpkt->n6.nxdata) == 100 && NetworkC$flag5[sim_node()] != 0)) {
                      __nesc_hton_uint16(temppkt->n6.nxdata, NetworkC$wa[sim_node()] / 1000);
                      NetworkC$flag6[sim_node()] = 1;
                      sim_log_debug(690U, "Forward", "btrpkt->n1= %d.\n", __nesc_ntoh_uint16(btrpkt->n1.nxdata));
                      sim_log_debug(691U, "Forward", "btrpkt->n2= %d.\n", __nesc_ntoh_uint16(btrpkt->n2.nxdata));
                      sim_log_debug(692U, "Forward", "btrpkt->n3= %d.\n", __nesc_ntoh_uint16(btrpkt->n3.nxdata));
                      sim_log_debug(693U, "Forward", "btrpkt->n4= %d.\n", __nesc_ntoh_uint16(btrpkt->n4.nxdata));
                      sim_log_debug(694U, "Forward", "btrpkt->n5= %d.\n", __nesc_ntoh_uint16(btrpkt->n5.nxdata));
                      sim_log_debug(695U, "Forward", "btrpkt->n6= %d.\n", __nesc_ntoh_uint16(btrpkt->n6.nxdata));
                      sim_log_debug(696U, "Forward", "temppkt6= %d.\n", __nesc_ntoh_uint16(temppkt->n6.nxdata));
                    }
                  else {
#line 2910
                    if ((__nesc_ntoh_uint16(btrpkt->n5.nxdata) == 100 && __nesc_ntoh_uint16(btrpkt->n4.nxdata) != 100 && __nesc_ntoh_uint16(btrpkt->n3.nxdata) != 100 && __nesc_ntoh_uint16(btrpkt->n2.nxdata) != 100 && __nesc_ntoh_uint16(btrpkt->n1.nxdata) != 100) || (__nesc_ntoh_uint16(btrpkt->n5.nxdata) == 100 && NetworkC$flag4[sim_node()] != 0)) {
                        __nesc_hton_uint16(temppkt->n5.nxdata, NetworkC$wa[sim_node()] / 1000);
                        NetworkC$flag5[sim_node()] = 1;
                        sim_log_debug(697U, "Forward", "temppkt5= %d.\n", __nesc_ntoh_uint16(temppkt->n5.nxdata));
                      }
                    else {
#line 2915
                      if ((__nesc_ntoh_uint16(btrpkt->n4.nxdata) == 100 && __nesc_ntoh_uint16(btrpkt->n3.nxdata) != 100 && __nesc_ntoh_uint16(btrpkt->n2.nxdata) != 100 && __nesc_ntoh_uint16(btrpkt->n1.nxdata) != 100) || (__nesc_ntoh_uint16(btrpkt->n4.nxdata) == 100 && NetworkC$flag3[sim_node()] != 0)) {
                          __nesc_hton_uint16(temppkt->n4.nxdata, NetworkC$wa[sim_node()] / 1000);
                          NetworkC$flag4[sim_node()] = 1;
                          sim_log_debug(698U, "Forward", "temppkt4= %d.\n", __nesc_ntoh_uint16(temppkt->n4.nxdata));
                        }
                      else {
#line 2920
                        if ((__nesc_ntoh_uint16(btrpkt->n3.nxdata) == 100 && __nesc_ntoh_uint16(btrpkt->n2.nxdata) != 100 && __nesc_ntoh_uint16(btrpkt->n1.nxdata) != 100) || (__nesc_ntoh_uint16(btrpkt->n3.nxdata) == 100 && NetworkC$flag2[sim_node()] != 0)) {
                            __nesc_hton_uint16(temppkt->n3.nxdata, NetworkC$wa[sim_node()] / 1000);
                            NetworkC$flag3[sim_node()] = 1;
                            sim_log_debug(699U, "Forward", "temppkt3= %d.\n", __nesc_ntoh_uint16(temppkt->n3.nxdata));
                          }
                        else {
#line 2925
                          if ((__nesc_ntoh_uint16(btrpkt->n2.nxdata) == 100 && __nesc_ntoh_uint16(btrpkt->n1.nxdata) != 100) || (__nesc_ntoh_uint16(btrpkt->n2.nxdata) == 100 && NetworkC$flag1[sim_node()] != 0)) {
                              __nesc_hton_uint16(temppkt->n2.nxdata, NetworkC$wa[sim_node()] / 1000);
                              NetworkC$flag2[sim_node()] = 1;
                              sim_log_debug(700U, "Forward", "temppkt2= %d.\n", __nesc_ntoh_uint16(temppkt->n2.nxdata));
                            }
                          else {
                            if (__nesc_ntoh_uint16(btrpkt->n1.nxdata) == 100) {
                                __nesc_hton_uint16(temppkt->n1.nxdata, NetworkC$wa[sim_node()] / 1000);
                                NetworkC$flag1[sim_node()] = 1;
                                sim_log_debug(701U, "Forward", "temppkt1= %d.\n", __nesc_ntoh_uint16(temppkt->n1.nxdata));
                              }
                            }
                          }
                        }
                      }
                    }
#line 2937
                  NetworkC$wa[sim_node()] = (NetworkC$wa[sim_node()] - NetworkC$wa[sim_node()] / 1000 * 1000) * 10;
                  NetworkC$wb[sim_node()] = (NetworkC$wb[sim_node()] - NetworkC$wb[sim_node()] / 1000 * 1000) * 10;
                  sim_log_debug(702U, "Forward", "wa1= %d.\n", NetworkC$wa[sim_node()]);
                  sim_log_debug(703U, "Forward", "wb1= %d.\n", NetworkC$wb[sim_node()]);

                  NetworkC$ws1[sim_node()] = NetworkC$weishu(NetworkC$wa[sim_node()]);
                  NetworkC$ws2[sim_node()] = NetworkC$weishu(NetworkC$wb[sim_node()]);
                  NetworkC$flag[sim_node()] = 1;
                }

              NetworkC$wa2[sim_node()] = (float )NetworkC$wa[sim_node()] / 10000;
              NetworkC$wb2[sim_node()] = (float )NetworkC$wb[sim_node()] / 10000;

              sim_log_debug(704U, "Forward", "wa2= %f.\n", NetworkC$wa2[sim_node()]);
              sim_log_debug(705U, "Forward", "wb2= %f.\n", NetworkC$wb2[sim_node()]);

              __nesc_hton_uint16(temppkt->a.nxdata, (int )(NetworkC$wa2[sim_node()] * NetworkC$z[sim_node()]));
              __nesc_hton_uint16(temppkt->b.nxdata, (int )(NetworkC$wb2[sim_node()] * NetworkC$z[sim_node()]));
              if (NetworkC$flag[sim_node()] == 0) {
                  __nesc_hton_uint16(temppkt->n1.nxdata, __nesc_ntoh_uint16(btrpkt->n1.nxdata));
                  __nesc_hton_uint16(temppkt->n2.nxdata, __nesc_ntoh_uint16(btrpkt->n2.nxdata));
                  __nesc_hton_uint16(temppkt->n3.nxdata, __nesc_ntoh_uint16(btrpkt->n3.nxdata));
                  __nesc_hton_uint16(temppkt->n4.nxdata, __nesc_ntoh_uint16(btrpkt->n4.nxdata));
                  __nesc_hton_uint16(temppkt->n5.nxdata, __nesc_ntoh_uint16(btrpkt->n5.nxdata));
                  __nesc_hton_uint16(temppkt->n6.nxdata, __nesc_ntoh_uint16(btrpkt->n6.nxdata));
                }
              else 
#line 2962
                {
                  NetworkC$pdflag(&NetworkC$flag[sim_node()], &NetworkC$flag1[sim_node()], &NetworkC$flag2[sim_node()], &NetworkC$flag3[sim_node()], &NetworkC$flag4[sim_node()], &NetworkC$flag5[sim_node()], &NetworkC$flag6[sim_node()], btrpkt, temppkt);
                }
              sim_log_debug(706U, "Forward", "temppkt->n1= %d.\n", __nesc_ntoh_uint16(temppkt->n1.nxdata));
              sim_log_debug(707U, "Forward", "temppkt->n2= %d.\n", __nesc_ntoh_uint16(temppkt->n2.nxdata));
              sim_log_debug(708U, "Forward", "temppkt->n3= %d.\n", __nesc_ntoh_uint16(temppkt->n3.nxdata));
              sim_log_debug(709U, "Forward", "temppkt->n4= %d.\n", __nesc_ntoh_uint16(temppkt->n4.nxdata));
              sim_log_debug(710U, "Forward", "temppkt->n5= %d.\n", __nesc_ntoh_uint16(temppkt->n5.nxdata));
              sim_log_debug(711U, "Forward", "temppkt->n6= %d.\n", __nesc_ntoh_uint16(temppkt->n6.nxdata));

              sim_log_debug(712U, "Forward", "m25-12= %f.\n", NetworkC$m[sim_node()]);
              sim_log_debug(713U, "Forward", "n25-12= %f.\n", NetworkC$n[sim_node()]);
              sim_log_debug(714U, "Forward", "a25-12= %d.\n", __nesc_ntoh_uint16(temppkt->a.nxdata));
              sim_log_debug(715U, "Forward", "b25-12= %d.\n", __nesc_ntoh_uint16(temppkt->b.nxdata));

              __nesc_hton_uint16(temppkt->nodeid.nxdata, TOS_NODE_ID);
              __nesc_hton_uint16(temppkt->sourceid.nxdata, __nesc_ntoh_uint16(btrpkt->sourceid.nxdata));
              __nesc_hton_uint16(temppkt->count.nxdata, __nesc_ntoh_uint16(btrpkt->count.nxdata));
              if (!NetworkC$busy[sim_node()]) {
                  if (NetworkC$AMSend$send(AM_BROADCAST_ADDR, &NetworkC$pkt[sim_node()], sizeof(NetworkMsg )) == SUCCESS) {
                      NetworkC$busy[sim_node()] = TRUE;
                    }
                }
            }
        }


      if (TOS_NODE_ID == 13 && __nesc_ntoh_uint16(btrpkt->nodeid.nxdata) == 14) {
          NetworkMsg *temppkt = (NetworkMsg *)NetworkC$Packet$getPayload(&NetworkC$pkt[sim_node()], sizeof(NetworkMsg ));

#line 2991
          sim_log_debug(716U, "Forward", "r1413= %d.\n", NetworkC$r1413[sim_node()]);
          NetworkC$ssbm(btrpkt);
          NetworkC$wa[sim_node()] = NetworkC$m[sim_node()] * 10000;
          NetworkC$wb[sim_node()] = NetworkC$n[sim_node()] * 10000;

          NetworkC$ws1[sim_node()] = NetworkC$weishu(NetworkC$wa[sim_node()]);
          NetworkC$ws2[sim_node()] = NetworkC$weishu(NetworkC$wb[sim_node()]);
          sim_log_debug(717U, "Forward", "ws1= %d.\n", NetworkC$ws1[sim_node()]);
          sim_log_debug(718U, "Forward", "ws2= %d.\n", NetworkC$ws2[sim_node()]);
          while (NetworkC$ws1[sim_node()] == NetworkC$ws2[sim_node()] && NetworkC$wa[sim_node()] / 1000 == NetworkC$wb[sim_node()] / 1000) {

              if ((__nesc_ntoh_uint16(btrpkt->n6.nxdata) == 100 && __nesc_ntoh_uint16(btrpkt->n5.nxdata) != 100 && __nesc_ntoh_uint16(btrpkt->n4.nxdata) != 100 && __nesc_ntoh_uint16(btrpkt->n3.nxdata) != 100 && __nesc_ntoh_uint16(btrpkt->n2.nxdata) != 100 && __nesc_ntoh_uint16(btrpkt->n1.nxdata) != 100) || (__nesc_ntoh_uint16(btrpkt->n6.nxdata) == 100 && NetworkC$flag5[sim_node()] != 0)) {
                  __nesc_hton_uint16(temppkt->n6.nxdata, NetworkC$wa[sim_node()] / 1000);
                  NetworkC$flag6[sim_node()] = 1;
                  sim_log_debug(719U, "Forward", "btrpkt->n1= %d.\n", __nesc_ntoh_uint16(btrpkt->n1.nxdata));
                  sim_log_debug(720U, "Forward", "btrpkt->n2= %d.\n", __nesc_ntoh_uint16(btrpkt->n2.nxdata));
                  sim_log_debug(721U, "Forward", "btrpkt->n3= %d.\n", __nesc_ntoh_uint16(btrpkt->n3.nxdata));
                  sim_log_debug(722U, "Forward", "btrpkt->n4= %d.\n", __nesc_ntoh_uint16(btrpkt->n4.nxdata));
                  sim_log_debug(723U, "Forward", "btrpkt->n5= %d.\n", __nesc_ntoh_uint16(btrpkt->n5.nxdata));
                  sim_log_debug(724U, "Forward", "btrpkt->n6= %d.\n", __nesc_ntoh_uint16(btrpkt->n6.nxdata));
                  sim_log_debug(725U, "Forward", "temppkt6= %d.\n", __nesc_ntoh_uint16(temppkt->n6.nxdata));
                }
              else {
#line 3013
                if ((__nesc_ntoh_uint16(btrpkt->n5.nxdata) == 100 && __nesc_ntoh_uint16(btrpkt->n4.nxdata) != 100 && __nesc_ntoh_uint16(btrpkt->n3.nxdata) != 100 && __nesc_ntoh_uint16(btrpkt->n2.nxdata) != 100 && __nesc_ntoh_uint16(btrpkt->n1.nxdata) != 100) || (__nesc_ntoh_uint16(btrpkt->n5.nxdata) == 100 && NetworkC$flag4[sim_node()] != 0)) {
                    __nesc_hton_uint16(temppkt->n5.nxdata, NetworkC$wa[sim_node()] / 1000);
                    NetworkC$flag5[sim_node()] = 1;
                    sim_log_debug(726U, "Forward", "temppkt5= %d.\n", __nesc_ntoh_uint16(temppkt->n5.nxdata));
                  }
                else {
#line 3018
                  if ((__nesc_ntoh_uint16(btrpkt->n4.nxdata) == 100 && __nesc_ntoh_uint16(btrpkt->n3.nxdata) != 100 && __nesc_ntoh_uint16(btrpkt->n2.nxdata) != 100 && __nesc_ntoh_uint16(btrpkt->n1.nxdata) != 100) || (__nesc_ntoh_uint16(btrpkt->n4.nxdata) == 100 && NetworkC$flag3[sim_node()] != 0)) {
                      __nesc_hton_uint16(temppkt->n4.nxdata, NetworkC$wa[sim_node()] / 1000);
                      NetworkC$flag4[sim_node()] = 1;
                      sim_log_debug(727U, "Forward", "temppkt4= %d.\n", __nesc_ntoh_uint16(temppkt->n4.nxdata));
                    }
                  else {
#line 3023
                    if ((__nesc_ntoh_uint16(btrpkt->n3.nxdata) == 100 && __nesc_ntoh_uint16(btrpkt->n2.nxdata) != 100 && __nesc_ntoh_uint16(btrpkt->n1.nxdata) != 100) || (__nesc_ntoh_uint16(btrpkt->n3.nxdata) == 100 && NetworkC$flag2[sim_node()] != 0)) {
                        __nesc_hton_uint16(temppkt->n3.nxdata, NetworkC$wa[sim_node()] / 1000);
                        NetworkC$flag3[sim_node()] = 1;
                        sim_log_debug(728U, "Forward", "temppkt3= %d.\n", __nesc_ntoh_uint16(temppkt->n3.nxdata));
                      }
                    else {
#line 3028
                      if ((__nesc_ntoh_uint16(btrpkt->n2.nxdata) == 100 && __nesc_ntoh_uint16(btrpkt->n1.nxdata) != 100) || (__nesc_ntoh_uint16(btrpkt->n2.nxdata) == 100 && NetworkC$flag1[sim_node()] != 0)) {
                          __nesc_hton_uint16(temppkt->n2.nxdata, NetworkC$wa[sim_node()] / 1000);
                          NetworkC$flag2[sim_node()] = 1;
                          sim_log_debug(729U, "Forward", "temppkt2= %d.\n", __nesc_ntoh_uint16(temppkt->n2.nxdata));
                        }
                      else {
                        if (__nesc_ntoh_uint16(btrpkt->n1.nxdata) == 100) {
                            __nesc_hton_uint16(temppkt->n1.nxdata, NetworkC$wa[sim_node()] / 1000);
                            NetworkC$flag1[sim_node()] = 1;
                            sim_log_debug(730U, "Forward", "temppkt1= %d.\n", __nesc_ntoh_uint16(temppkt->n1.nxdata));
                          }
                        }
                      }
                    }
                  }
                }
#line 3040
              NetworkC$wa[sim_node()] = (NetworkC$wa[sim_node()] - NetworkC$wa[sim_node()] / 1000 * 1000) * 10;
              NetworkC$wb[sim_node()] = (NetworkC$wb[sim_node()] - NetworkC$wb[sim_node()] / 1000 * 1000) * 10;
              sim_log_debug(731U, "Forward", "wa1= %d.\n", NetworkC$wa[sim_node()]);
              sim_log_debug(732U, "Forward", "wb1= %d.\n", NetworkC$wb[sim_node()]);

              NetworkC$ws1[sim_node()] = NetworkC$weishu(NetworkC$wa[sim_node()]);
              NetworkC$ws2[sim_node()] = NetworkC$weishu(NetworkC$wb[sim_node()]);
              NetworkC$flag[sim_node()] = 1;
            }

          NetworkC$wa2[sim_node()] = (float )NetworkC$wa[sim_node()] / 10000;
          NetworkC$wb2[sim_node()] = (float )NetworkC$wb[sim_node()] / 10000;

          sim_log_debug(733U, "Forward", "wa2= %f.\n", NetworkC$wa2[sim_node()]);
          sim_log_debug(734U, "Forward", "wb2= %f.\n", NetworkC$wb2[sim_node()]);

          __nesc_hton_uint16(temppkt->a.nxdata, (int )(NetworkC$wa2[sim_node()] * NetworkC$z[sim_node()]));
          __nesc_hton_uint16(temppkt->b.nxdata, (int )(NetworkC$wb2[sim_node()] * NetworkC$z[sim_node()]));
          if (NetworkC$flag[sim_node()] == 0) {
              __nesc_hton_uint16(temppkt->n1.nxdata, __nesc_ntoh_uint16(btrpkt->n1.nxdata));
              __nesc_hton_uint16(temppkt->n2.nxdata, __nesc_ntoh_uint16(btrpkt->n2.nxdata));
              __nesc_hton_uint16(temppkt->n3.nxdata, __nesc_ntoh_uint16(btrpkt->n3.nxdata));
              __nesc_hton_uint16(temppkt->n4.nxdata, __nesc_ntoh_uint16(btrpkt->n4.nxdata));
              __nesc_hton_uint16(temppkt->n5.nxdata, __nesc_ntoh_uint16(btrpkt->n5.nxdata));
              __nesc_hton_uint16(temppkt->n6.nxdata, __nesc_ntoh_uint16(btrpkt->n6.nxdata));
            }
          else 
#line 3065
            {
              NetworkC$pdflag(&NetworkC$flag[sim_node()], &NetworkC$flag1[sim_node()], &NetworkC$flag2[sim_node()], &NetworkC$flag3[sim_node()], &NetworkC$flag4[sim_node()], &NetworkC$flag5[sim_node()], &NetworkC$flag6[sim_node()], btrpkt, temppkt);
            }
          sim_log_debug(735U, "Forward", "temppkt->n1= %d.\n", __nesc_ntoh_uint16(temppkt->n1.nxdata));
          sim_log_debug(736U, "Forward", "temppkt->n2= %d.\n", __nesc_ntoh_uint16(temppkt->n2.nxdata));
          sim_log_debug(737U, "Forward", "temppkt->n3= %d.\n", __nesc_ntoh_uint16(temppkt->n3.nxdata));
          sim_log_debug(738U, "Forward", "temppkt->n4= %d.\n", __nesc_ntoh_uint16(temppkt->n4.nxdata));
          sim_log_debug(739U, "Forward", "temppkt->n5= %d.\n", __nesc_ntoh_uint16(temppkt->n5.nxdata));
          sim_log_debug(740U, "Forward", "temppkt->n6= %d.\n", __nesc_ntoh_uint16(temppkt->n6.nxdata));

          sim_log_debug(741U, "Forward", "m14-13= %f.\n", NetworkC$m[sim_node()]);
          sim_log_debug(742U, "Forward", "n14-13= %f.\n", NetworkC$n[sim_node()]);
          sim_log_debug(743U, "Forward", "a14-13= %d.\n", __nesc_ntoh_uint16(temppkt->a.nxdata));
          sim_log_debug(744U, "Forward", "b14-13= %d.\n", __nesc_ntoh_uint16(temppkt->b.nxdata));

          __nesc_hton_uint16(temppkt->nodeid.nxdata, TOS_NODE_ID);
          __nesc_hton_uint16(temppkt->sourceid.nxdata, __nesc_ntoh_uint16(btrpkt->sourceid.nxdata));
          __nesc_hton_uint16(temppkt->count.nxdata, __nesc_ntoh_uint16(btrpkt->count.nxdata));
          if (!NetworkC$busy[sim_node()]) {
              if (NetworkC$AMSend$send(AM_BROADCAST_ADDR, &NetworkC$pkt[sim_node()], sizeof(NetworkMsg )) == SUCCESS) {
                  NetworkC$busy[sim_node()] = TRUE;
                }
            }
        }


      if (TOS_NODE_ID == 14) {
          sim_log_debug(745U, "Forward", "r152714= %d.\n", NetworkC$r152714[sim_node()]);
          sim_log_debug(746U, "Forward", "r1514= %d.\n", NetworkC$r1514[sim_node()]);
          sim_log_debug(747U, "Forward", "r2714= %d.\n", NetworkC$r2714[sim_node()]);
          sim_log_debug(748U, "Forward", "s14[0]= %f.\n", NetworkC$s14[sim_node()][0]);
          sim_log_debug(749U, "Forward", "s14[1]= %f.\n", NetworkC$s14[sim_node()][1]);
          sim_log_debug(750U, "Forward", "s14[2]= %f.\n", NetworkC$s14[sim_node()][2]);
          sim_log_debug(751U, "Forward", "s14[3]= %f.\n", NetworkC$s14[sim_node()][3]);

          if (__nesc_ntoh_uint16(btrpkt->nodeid.nxdata) == 15) {
              NetworkMsg *temppkt = (NetworkMsg *)NetworkC$Packet$getPayload(&NetworkC$pkt[sim_node()], sizeof(NetworkMsg ));

#line 3102
              NetworkC$ssbm(btrpkt);
              NetworkC$wa[sim_node()] = NetworkC$m[sim_node()] * 10000;
              NetworkC$wb[sim_node()] = NetworkC$n[sim_node()] * 10000;

              NetworkC$ws1[sim_node()] = NetworkC$weishu(NetworkC$wa[sim_node()]);
              NetworkC$ws2[sim_node()] = NetworkC$weishu(NetworkC$wb[sim_node()]);
              sim_log_debug(752U, "Forward", "ws1= %d.\n", NetworkC$ws1[sim_node()]);
              sim_log_debug(753U, "Forward", "ws2= %d.\n", NetworkC$ws2[sim_node()]);
              while (NetworkC$ws1[sim_node()] == NetworkC$ws2[sim_node()] && NetworkC$wa[sim_node()] / 1000 == NetworkC$wb[sim_node()] / 1000) {

                  if ((__nesc_ntoh_uint16(btrpkt->n6.nxdata) == 100 && __nesc_ntoh_uint16(btrpkt->n5.nxdata) != 100 && __nesc_ntoh_uint16(btrpkt->n4.nxdata) != 100 && __nesc_ntoh_uint16(btrpkt->n3.nxdata) != 100 && __nesc_ntoh_uint16(btrpkt->n2.nxdata) != 100 && __nesc_ntoh_uint16(btrpkt->n1.nxdata) != 100) || (__nesc_ntoh_uint16(btrpkt->n6.nxdata) == 100 && NetworkC$flag5[sim_node()] != 0)) {
                      __nesc_hton_uint16(temppkt->n6.nxdata, NetworkC$wa[sim_node()] / 1000);
                      NetworkC$flag6[sim_node()] = 1;
                      sim_log_debug(754U, "Forward", "btrpkt->n1= %d.\n", __nesc_ntoh_uint16(btrpkt->n1.nxdata));
                      sim_log_debug(755U, "Forward", "btrpkt->n2= %d.\n", __nesc_ntoh_uint16(btrpkt->n2.nxdata));
                      sim_log_debug(756U, "Forward", "btrpkt->n3= %d.\n", __nesc_ntoh_uint16(btrpkt->n3.nxdata));
                      sim_log_debug(757U, "Forward", "btrpkt->n4= %d.\n", __nesc_ntoh_uint16(btrpkt->n4.nxdata));
                      sim_log_debug(758U, "Forward", "btrpkt->n5= %d.\n", __nesc_ntoh_uint16(btrpkt->n5.nxdata));
                      sim_log_debug(759U, "Forward", "btrpkt->n6= %d.\n", __nesc_ntoh_uint16(btrpkt->n6.nxdata));
                      sim_log_debug(760U, "Forward", "temppkt6= %d.\n", __nesc_ntoh_uint16(temppkt->n6.nxdata));
                    }
                  else {
#line 3123
                    if ((__nesc_ntoh_uint16(btrpkt->n5.nxdata) == 100 && __nesc_ntoh_uint16(btrpkt->n4.nxdata) != 100 && __nesc_ntoh_uint16(btrpkt->n3.nxdata) != 100 && __nesc_ntoh_uint16(btrpkt->n2.nxdata) != 100 && __nesc_ntoh_uint16(btrpkt->n1.nxdata) != 100) || (__nesc_ntoh_uint16(btrpkt->n5.nxdata) == 100 && NetworkC$flag4[sim_node()] != 0)) {
                        __nesc_hton_uint16(temppkt->n5.nxdata, NetworkC$wa[sim_node()] / 1000);
                        NetworkC$flag5[sim_node()] = 1;
                        sim_log_debug(761U, "Forward", "temppkt5= %d.\n", __nesc_ntoh_uint16(temppkt->n5.nxdata));
                      }
                    else {
#line 3128
                      if ((__nesc_ntoh_uint16(btrpkt->n4.nxdata) == 100 && __nesc_ntoh_uint16(btrpkt->n3.nxdata) != 100 && __nesc_ntoh_uint16(btrpkt->n2.nxdata) != 100 && __nesc_ntoh_uint16(btrpkt->n1.nxdata) != 100) || (__nesc_ntoh_uint16(btrpkt->n4.nxdata) == 100 && NetworkC$flag3[sim_node()] != 0)) {
                          __nesc_hton_uint16(temppkt->n4.nxdata, NetworkC$wa[sim_node()] / 1000);
                          NetworkC$flag4[sim_node()] = 1;
                          sim_log_debug(762U, "Forward", "temppkt4= %d.\n", __nesc_ntoh_uint16(temppkt->n4.nxdata));
                        }
                      else {
#line 3133
                        if ((__nesc_ntoh_uint16(btrpkt->n3.nxdata) == 100 && __nesc_ntoh_uint16(btrpkt->n2.nxdata) != 100 && __nesc_ntoh_uint16(btrpkt->n1.nxdata) != 100) || (__nesc_ntoh_uint16(btrpkt->n3.nxdata) == 100 && NetworkC$flag2[sim_node()] != 0)) {
                            __nesc_hton_uint16(temppkt->n3.nxdata, NetworkC$wa[sim_node()] / 1000);
                            NetworkC$flag3[sim_node()] = 1;
                            sim_log_debug(763U, "Forward", "temppkt3= %d.\n", __nesc_ntoh_uint16(temppkt->n3.nxdata));
                          }
                        else {
#line 3138
                          if ((__nesc_ntoh_uint16(btrpkt->n2.nxdata) == 100 && __nesc_ntoh_uint16(btrpkt->n1.nxdata) != 100) || (__nesc_ntoh_uint16(btrpkt->n2.nxdata) == 100 && NetworkC$flag1[sim_node()] != 0)) {
                              __nesc_hton_uint16(temppkt->n2.nxdata, NetworkC$wa[sim_node()] / 1000);
                              NetworkC$flag2[sim_node()] = 1;
                              sim_log_debug(764U, "Forward", "temppkt2= %d.\n", __nesc_ntoh_uint16(temppkt->n2.nxdata));
                            }
                          else {
                            if (__nesc_ntoh_uint16(btrpkt->n1.nxdata) == 100) {
                                __nesc_hton_uint16(temppkt->n1.nxdata, NetworkC$wa[sim_node()] / 1000);
                                NetworkC$flag1[sim_node()] = 1;
                                sim_log_debug(765U, "Forward", "temppkt1= %d.\n", __nesc_ntoh_uint16(temppkt->n1.nxdata));
                              }
                            }
                          }
                        }
                      }
                    }
#line 3150
                  NetworkC$wa[sim_node()] = (NetworkC$wa[sim_node()] - NetworkC$wa[sim_node()] / 1000 * 1000) * 10;
                  NetworkC$wb[sim_node()] = (NetworkC$wb[sim_node()] - NetworkC$wb[sim_node()] / 1000 * 1000) * 10;
                  sim_log_debug(766U, "Forward", "wa1= %d.\n", NetworkC$wa[sim_node()]);
                  sim_log_debug(767U, "Forward", "wb1= %d.\n", NetworkC$wb[sim_node()]);

                  NetworkC$ws1[sim_node()] = NetworkC$weishu(NetworkC$wa[sim_node()]);
                  NetworkC$ws2[sim_node()] = NetworkC$weishu(NetworkC$wb[sim_node()]);
                  NetworkC$flag[sim_node()] = 1;
                }

              NetworkC$wa2[sim_node()] = (float )NetworkC$wa[sim_node()] / 10000;
              NetworkC$wb2[sim_node()] = (float )NetworkC$wb[sim_node()] / 10000;

              sim_log_debug(768U, "Forward", "wa2= %f.\n", NetworkC$wa2[sim_node()]);
              sim_log_debug(769U, "Forward", "wb2= %f.\n", NetworkC$wb2[sim_node()]);

              __nesc_hton_uint16(temppkt->a.nxdata, (int )(NetworkC$wa2[sim_node()] * NetworkC$z[sim_node()]));
              __nesc_hton_uint16(temppkt->b.nxdata, (int )(NetworkC$wb2[sim_node()] * NetworkC$z[sim_node()]));
              if (NetworkC$flag[sim_node()] == 0) {
                  __nesc_hton_uint16(temppkt->n1.nxdata, __nesc_ntoh_uint16(btrpkt->n1.nxdata));
                  __nesc_hton_uint16(temppkt->n2.nxdata, __nesc_ntoh_uint16(btrpkt->n2.nxdata));
                  __nesc_hton_uint16(temppkt->n3.nxdata, __nesc_ntoh_uint16(btrpkt->n3.nxdata));
                  __nesc_hton_uint16(temppkt->n4.nxdata, __nesc_ntoh_uint16(btrpkt->n4.nxdata));
                  __nesc_hton_uint16(temppkt->n5.nxdata, __nesc_ntoh_uint16(btrpkt->n5.nxdata));
                  __nesc_hton_uint16(temppkt->n6.nxdata, __nesc_ntoh_uint16(btrpkt->n6.nxdata));
                }
              else 
#line 3175
                {
                  NetworkC$pdflag(&NetworkC$flag[sim_node()], &NetworkC$flag1[sim_node()], &NetworkC$flag2[sim_node()], &NetworkC$flag3[sim_node()], &NetworkC$flag4[sim_node()], &NetworkC$flag5[sim_node()], &NetworkC$flag6[sim_node()], btrpkt, temppkt);
                }
              sim_log_debug(770U, "Forward", "temppkt->n1= %d.\n", __nesc_ntoh_uint16(temppkt->n1.nxdata));
              sim_log_debug(771U, "Forward", "temppkt->n2= %d.\n", __nesc_ntoh_uint16(temppkt->n2.nxdata));
              sim_log_debug(772U, "Forward", "temppkt->n3= %d.\n", __nesc_ntoh_uint16(temppkt->n3.nxdata));
              sim_log_debug(773U, "Forward", "temppkt->n4= %d.\n", __nesc_ntoh_uint16(temppkt->n4.nxdata));
              sim_log_debug(774U, "Forward", "temppkt->n5= %d.\n", __nesc_ntoh_uint16(temppkt->n5.nxdata));
              sim_log_debug(775U, "Forward", "temppkt->n6= %d.\n", __nesc_ntoh_uint16(temppkt->n6.nxdata));

              sim_log_debug(776U, "Forward", "m15-14= %f.\n", NetworkC$m[sim_node()]);
              sim_log_debug(777U, "Forward", "n15-14= %f.\n", NetworkC$n[sim_node()]);
              sim_log_debug(778U, "Forward", "a15-14= %d.\n", __nesc_ntoh_uint16(temppkt->a.nxdata));
              sim_log_debug(779U, "Forward", "b15-14= %d.\n", __nesc_ntoh_uint16(temppkt->b.nxdata));

              __nesc_hton_uint16(temppkt->nodeid.nxdata, TOS_NODE_ID);
              __nesc_hton_uint16(temppkt->sourceid.nxdata, __nesc_ntoh_uint16(btrpkt->sourceid.nxdata));
              __nesc_hton_uint16(temppkt->count.nxdata, __nesc_ntoh_uint16(btrpkt->count.nxdata));
              if (!NetworkC$busy[sim_node()]) {
                  if (NetworkC$AMSend$send(AM_BROADCAST_ADDR, &NetworkC$pkt[sim_node()], sizeof(NetworkMsg )) == SUCCESS) {
                      NetworkC$busy[sim_node()] = TRUE;
                    }
                }
            }
          if (__nesc_ntoh_uint16(btrpkt->nodeid.nxdata) == 27) {
              NetworkMsg *temppkt = (NetworkMsg *)NetworkC$Packet$getPayload(&NetworkC$pkt[sim_node()], sizeof(NetworkMsg ));

#line 3201
              NetworkC$ssbm(btrpkt);
              NetworkC$wa[sim_node()] = NetworkC$m[sim_node()] * 10000;
              NetworkC$wb[sim_node()] = NetworkC$n[sim_node()] * 10000;

              NetworkC$ws1[sim_node()] = NetworkC$weishu(NetworkC$wa[sim_node()]);
              NetworkC$ws2[sim_node()] = NetworkC$weishu(NetworkC$wb[sim_node()]);
              sim_log_debug(780U, "Forward", "ws1= %d.\n", NetworkC$ws1[sim_node()]);
              sim_log_debug(781U, "Forward", "ws2= %d.\n", NetworkC$ws2[sim_node()]);
              while (NetworkC$ws1[sim_node()] == NetworkC$ws2[sim_node()] && NetworkC$wa[sim_node()] / 1000 == NetworkC$wb[sim_node()] / 1000) {

                  if ((__nesc_ntoh_uint16(btrpkt->n6.nxdata) == 100 && __nesc_ntoh_uint16(btrpkt->n5.nxdata) != 100 && __nesc_ntoh_uint16(btrpkt->n4.nxdata) != 100 && __nesc_ntoh_uint16(btrpkt->n3.nxdata) != 100 && __nesc_ntoh_uint16(btrpkt->n2.nxdata) != 100 && __nesc_ntoh_uint16(btrpkt->n1.nxdata) != 100) || (__nesc_ntoh_uint16(btrpkt->n6.nxdata) == 100 && NetworkC$flag5[sim_node()] != 0)) {
                      __nesc_hton_uint16(temppkt->n6.nxdata, NetworkC$wa[sim_node()] / 1000);
                      NetworkC$flag6[sim_node()] = 1;
                      sim_log_debug(782U, "Forward", "btrpkt->n1= %d.\n", __nesc_ntoh_uint16(btrpkt->n1.nxdata));
                      sim_log_debug(783U, "Forward", "btrpkt->n2= %d.\n", __nesc_ntoh_uint16(btrpkt->n2.nxdata));
                      sim_log_debug(784U, "Forward", "btrpkt->n3= %d.\n", __nesc_ntoh_uint16(btrpkt->n3.nxdata));
                      sim_log_debug(785U, "Forward", "btrpkt->n4= %d.\n", __nesc_ntoh_uint16(btrpkt->n4.nxdata));
                      sim_log_debug(786U, "Forward", "btrpkt->n5= %d.\n", __nesc_ntoh_uint16(btrpkt->n5.nxdata));
                      sim_log_debug(787U, "Forward", "btrpkt->n6= %d.\n", __nesc_ntoh_uint16(btrpkt->n6.nxdata));
                      sim_log_debug(788U, "Forward", "temppkt6= %d.\n", __nesc_ntoh_uint16(temppkt->n6.nxdata));
                    }
                  else {
#line 3222
                    if ((__nesc_ntoh_uint16(btrpkt->n5.nxdata) == 100 && __nesc_ntoh_uint16(btrpkt->n4.nxdata) != 100 && __nesc_ntoh_uint16(btrpkt->n3.nxdata) != 100 && __nesc_ntoh_uint16(btrpkt->n2.nxdata) != 100 && __nesc_ntoh_uint16(btrpkt->n1.nxdata) != 100) || (__nesc_ntoh_uint16(btrpkt->n5.nxdata) == 100 && NetworkC$flag4[sim_node()] != 0)) {
                        __nesc_hton_uint16(temppkt->n5.nxdata, NetworkC$wa[sim_node()] / 1000);
                        NetworkC$flag5[sim_node()] = 1;
                        sim_log_debug(789U, "Forward", "temppkt5= %d.\n", __nesc_ntoh_uint16(temppkt->n5.nxdata));
                      }
                    else {
#line 3227
                      if ((__nesc_ntoh_uint16(btrpkt->n4.nxdata) == 100 && __nesc_ntoh_uint16(btrpkt->n3.nxdata) != 100 && __nesc_ntoh_uint16(btrpkt->n2.nxdata) != 100 && __nesc_ntoh_uint16(btrpkt->n1.nxdata) != 100) || (__nesc_ntoh_uint16(btrpkt->n4.nxdata) == 100 && NetworkC$flag3[sim_node()] != 0)) {
                          __nesc_hton_uint16(temppkt->n4.nxdata, NetworkC$wa[sim_node()] / 1000);
                          NetworkC$flag4[sim_node()] = 1;
                          sim_log_debug(790U, "Forward", "temppkt4= %d.\n", __nesc_ntoh_uint16(temppkt->n4.nxdata));
                        }
                      else {
#line 3232
                        if ((__nesc_ntoh_uint16(btrpkt->n3.nxdata) == 100 && __nesc_ntoh_uint16(btrpkt->n2.nxdata) != 100 && __nesc_ntoh_uint16(btrpkt->n1.nxdata) != 100) || (__nesc_ntoh_uint16(btrpkt->n3.nxdata) == 100 && NetworkC$flag2[sim_node()] != 0)) {
                            __nesc_hton_uint16(temppkt->n3.nxdata, NetworkC$wa[sim_node()] / 1000);
                            NetworkC$flag3[sim_node()] = 1;
                            sim_log_debug(791U, "Forward", "temppkt3= %d.\n", __nesc_ntoh_uint16(temppkt->n3.nxdata));
                          }
                        else {
#line 3237
                          if ((__nesc_ntoh_uint16(btrpkt->n2.nxdata) == 100 && __nesc_ntoh_uint16(btrpkt->n1.nxdata) != 100) || (__nesc_ntoh_uint16(btrpkt->n2.nxdata) == 100 && NetworkC$flag1[sim_node()] != 0)) {
                              __nesc_hton_uint16(temppkt->n2.nxdata, NetworkC$wa[sim_node()] / 1000);
                              NetworkC$flag2[sim_node()] = 1;
                              sim_log_debug(792U, "Forward", "temppkt2= %d.\n", __nesc_ntoh_uint16(temppkt->n2.nxdata));
                            }
                          else {
                            if (__nesc_ntoh_uint16(btrpkt->n1.nxdata) == 100) {
                                __nesc_hton_uint16(temppkt->n1.nxdata, NetworkC$wa[sim_node()] / 1000);
                                NetworkC$flag1[sim_node()] = 1;
                                sim_log_debug(793U, "Forward", "temppkt1= %d.\n", __nesc_ntoh_uint16(temppkt->n1.nxdata));
                              }
                            }
                          }
                        }
                      }
                    }
#line 3249
                  NetworkC$wa[sim_node()] = (NetworkC$wa[sim_node()] - NetworkC$wa[sim_node()] / 1000 * 1000) * 10;
                  NetworkC$wb[sim_node()] = (NetworkC$wb[sim_node()] - NetworkC$wb[sim_node()] / 1000 * 1000) * 10;
                  sim_log_debug(794U, "Forward", "wa1= %d.\n", NetworkC$wa[sim_node()]);
                  sim_log_debug(795U, "Forward", "wb1= %d.\n", NetworkC$wb[sim_node()]);

                  NetworkC$ws1[sim_node()] = NetworkC$weishu(NetworkC$wa[sim_node()]);
                  NetworkC$ws2[sim_node()] = NetworkC$weishu(NetworkC$wb[sim_node()]);
                  NetworkC$flag[sim_node()] = 1;
                }

              NetworkC$wa2[sim_node()] = (float )NetworkC$wa[sim_node()] / 10000;
              NetworkC$wb2[sim_node()] = (float )NetworkC$wb[sim_node()] / 10000;

              sim_log_debug(796U, "Forward", "wa2= %f.\n", NetworkC$wa2[sim_node()]);
              sim_log_debug(797U, "Forward", "wb2= %f.\n", NetworkC$wb2[sim_node()]);

              __nesc_hton_uint16(temppkt->a.nxdata, (int )(NetworkC$wa2[sim_node()] * NetworkC$z[sim_node()]));
              __nesc_hton_uint16(temppkt->b.nxdata, (int )(NetworkC$wb2[sim_node()] * NetworkC$z[sim_node()]));
              if (NetworkC$flag[sim_node()] == 0) {
                  __nesc_hton_uint16(temppkt->n1.nxdata, __nesc_ntoh_uint16(btrpkt->n1.nxdata));
                  __nesc_hton_uint16(temppkt->n2.nxdata, __nesc_ntoh_uint16(btrpkt->n2.nxdata));
                  __nesc_hton_uint16(temppkt->n3.nxdata, __nesc_ntoh_uint16(btrpkt->n3.nxdata));
                  __nesc_hton_uint16(temppkt->n4.nxdata, __nesc_ntoh_uint16(btrpkt->n4.nxdata));
                  __nesc_hton_uint16(temppkt->n5.nxdata, __nesc_ntoh_uint16(btrpkt->n5.nxdata));
                  __nesc_hton_uint16(temppkt->n6.nxdata, __nesc_ntoh_uint16(btrpkt->n6.nxdata));
                }
              else 
#line 3274
                {
                  NetworkC$pdflag(&NetworkC$flag[sim_node()], &NetworkC$flag1[sim_node()], &NetworkC$flag2[sim_node()], &NetworkC$flag3[sim_node()], &NetworkC$flag4[sim_node()], &NetworkC$flag5[sim_node()], &NetworkC$flag6[sim_node()], btrpkt, temppkt);
                }
              sim_log_debug(798U, "Forward", "temppkt->n1= %d.\n", __nesc_ntoh_uint16(temppkt->n1.nxdata));
              sim_log_debug(799U, "Forward", "temppkt->n2= %d.\n", __nesc_ntoh_uint16(temppkt->n2.nxdata));
              sim_log_debug(800U, "Forward", "temppkt->n3= %d.\n", __nesc_ntoh_uint16(temppkt->n3.nxdata));
              sim_log_debug(801U, "Forward", "temppkt->n4= %d.\n", __nesc_ntoh_uint16(temppkt->n4.nxdata));
              sim_log_debug(802U, "Forward", "temppkt->n5= %d.\n", __nesc_ntoh_uint16(temppkt->n5.nxdata));
              sim_log_debug(803U, "Forward", "temppkt->n6= %d.\n", __nesc_ntoh_uint16(temppkt->n6.nxdata));

              sim_log_debug(804U, "Forward", "m27-14= %f.\n", NetworkC$m[sim_node()]);
              sim_log_debug(805U, "Forward", "n27-14= %f.\n", NetworkC$n[sim_node()]);
              sim_log_debug(806U, "Forward", "a27-14= %d.\n", __nesc_ntoh_uint16(temppkt->a.nxdata));
              sim_log_debug(807U, "Forward", "b27-14= %d.\n", __nesc_ntoh_uint16(temppkt->b.nxdata));

              __nesc_hton_uint16(temppkt->nodeid.nxdata, TOS_NODE_ID);
              __nesc_hton_uint16(temppkt->sourceid.nxdata, __nesc_ntoh_uint16(btrpkt->sourceid.nxdata));
              __nesc_hton_uint16(temppkt->count.nxdata, __nesc_ntoh_uint16(btrpkt->count.nxdata));
              if (!NetworkC$busy[sim_node()]) {
                  if (NetworkC$AMSend$send(AM_BROADCAST_ADDR, &NetworkC$pkt[sim_node()], sizeof(NetworkMsg )) == SUCCESS) {
                      NetworkC$busy[sim_node()] = TRUE;
                    }
                }
            }
        }

      if (TOS_NODE_ID == 15 && __nesc_ntoh_uint16(btrpkt->nodeid.nxdata) == 16) {
          NetworkMsg *temppkt = (NetworkMsg *)NetworkC$Packet$getPayload(&NetworkC$pkt[sim_node()], sizeof(NetworkMsg ));

#line 3302
          sim_log_debug(808U, "Forward", "r1615= %d.\n", NetworkC$r1615[sim_node()]);
          NetworkC$ssbm(btrpkt);
          NetworkC$wa[sim_node()] = NetworkC$m[sim_node()] * 10000;
          NetworkC$wb[sim_node()] = NetworkC$n[sim_node()] * 10000;

          NetworkC$ws1[sim_node()] = NetworkC$weishu(NetworkC$wa[sim_node()]);
          NetworkC$ws2[sim_node()] = NetworkC$weishu(NetworkC$wb[sim_node()]);
          sim_log_debug(809U, "Forward", "ws1= %d.\n", NetworkC$ws1[sim_node()]);
          sim_log_debug(810U, "Forward", "ws2= %d.\n", NetworkC$ws2[sim_node()]);
          while (NetworkC$ws1[sim_node()] == NetworkC$ws2[sim_node()] && NetworkC$wa[sim_node()] / 1000 == NetworkC$wb[sim_node()] / 1000) {

              if ((__nesc_ntoh_uint16(btrpkt->n6.nxdata) == 100 && __nesc_ntoh_uint16(btrpkt->n5.nxdata) != 100 && __nesc_ntoh_uint16(btrpkt->n4.nxdata) != 100 && __nesc_ntoh_uint16(btrpkt->n3.nxdata) != 100 && __nesc_ntoh_uint16(btrpkt->n2.nxdata) != 100 && __nesc_ntoh_uint16(btrpkt->n1.nxdata) != 100) || (__nesc_ntoh_uint16(btrpkt->n6.nxdata) == 100 && NetworkC$flag5[sim_node()] != 0)) {
                  __nesc_hton_uint16(temppkt->n6.nxdata, NetworkC$wa[sim_node()] / 1000);
                  NetworkC$flag6[sim_node()] = 1;
                  sim_log_debug(811U, "Forward", "btrpkt->n1= %d.\n", __nesc_ntoh_uint16(btrpkt->n1.nxdata));
                  sim_log_debug(812U, "Forward", "btrpkt->n2= %d.\n", __nesc_ntoh_uint16(btrpkt->n2.nxdata));
                  sim_log_debug(813U, "Forward", "btrpkt->n3= %d.\n", __nesc_ntoh_uint16(btrpkt->n3.nxdata));
                  sim_log_debug(814U, "Forward", "btrpkt->n4= %d.\n", __nesc_ntoh_uint16(btrpkt->n4.nxdata));
                  sim_log_debug(815U, "Forward", "btrpkt->n5= %d.\n", __nesc_ntoh_uint16(btrpkt->n5.nxdata));
                  sim_log_debug(816U, "Forward", "btrpkt->n6= %d.\n", __nesc_ntoh_uint16(btrpkt->n6.nxdata));
                  sim_log_debug(817U, "Forward", "temppkt6= %d.\n", __nesc_ntoh_uint16(temppkt->n6.nxdata));
                }
              else {
#line 3324
                if ((__nesc_ntoh_uint16(btrpkt->n5.nxdata) == 100 && __nesc_ntoh_uint16(btrpkt->n4.nxdata) != 100 && __nesc_ntoh_uint16(btrpkt->n3.nxdata) != 100 && __nesc_ntoh_uint16(btrpkt->n2.nxdata) != 100 && __nesc_ntoh_uint16(btrpkt->n1.nxdata) != 100) || (__nesc_ntoh_uint16(btrpkt->n5.nxdata) == 100 && NetworkC$flag4[sim_node()] != 0)) {
                    __nesc_hton_uint16(temppkt->n5.nxdata, NetworkC$wa[sim_node()] / 1000);
                    NetworkC$flag5[sim_node()] = 1;
                    sim_log_debug(818U, "Forward", "temppkt5= %d.\n", __nesc_ntoh_uint16(temppkt->n5.nxdata));
                  }
                else {
#line 3329
                  if ((__nesc_ntoh_uint16(btrpkt->n4.nxdata) == 100 && __nesc_ntoh_uint16(btrpkt->n3.nxdata) != 100 && __nesc_ntoh_uint16(btrpkt->n2.nxdata) != 100 && __nesc_ntoh_uint16(btrpkt->n1.nxdata) != 100) || (__nesc_ntoh_uint16(btrpkt->n4.nxdata) == 100 && NetworkC$flag3[sim_node()] != 0)) {
                      __nesc_hton_uint16(temppkt->n4.nxdata, NetworkC$wa[sim_node()] / 1000);
                      NetworkC$flag4[sim_node()] = 1;
                      sim_log_debug(819U, "Forward", "temppkt4= %d.\n", __nesc_ntoh_uint16(temppkt->n4.nxdata));
                    }
                  else {
#line 3334
                    if ((__nesc_ntoh_uint16(btrpkt->n3.nxdata) == 100 && __nesc_ntoh_uint16(btrpkt->n2.nxdata) != 100 && __nesc_ntoh_uint16(btrpkt->n1.nxdata) != 100) || (__nesc_ntoh_uint16(btrpkt->n3.nxdata) == 100 && NetworkC$flag2[sim_node()] != 0)) {
                        __nesc_hton_uint16(temppkt->n3.nxdata, NetworkC$wa[sim_node()] / 1000);
                        NetworkC$flag3[sim_node()] = 1;
                        sim_log_debug(820U, "Forward", "temppkt3= %d.\n", __nesc_ntoh_uint16(temppkt->n3.nxdata));
                      }
                    else {
#line 3339
                      if ((__nesc_ntoh_uint16(btrpkt->n2.nxdata) == 100 && __nesc_ntoh_uint16(btrpkt->n1.nxdata) != 100) || (__nesc_ntoh_uint16(btrpkt->n2.nxdata) == 100 && NetworkC$flag1[sim_node()] != 0)) {
                          __nesc_hton_uint16(temppkt->n2.nxdata, NetworkC$wa[sim_node()] / 1000);
                          NetworkC$flag2[sim_node()] = 1;
                          sim_log_debug(821U, "Forward", "temppkt2= %d.\n", __nesc_ntoh_uint16(temppkt->n2.nxdata));
                        }
                      else {
                        if (__nesc_ntoh_uint16(btrpkt->n1.nxdata) == 100) {
                            __nesc_hton_uint16(temppkt->n1.nxdata, NetworkC$wa[sim_node()] / 1000);
                            NetworkC$flag1[sim_node()] = 1;
                            sim_log_debug(822U, "Forward", "temppkt1= %d.\n", __nesc_ntoh_uint16(temppkt->n1.nxdata));
                          }
                        }
                      }
                    }
                  }
                }
#line 3351
              NetworkC$wa[sim_node()] = (NetworkC$wa[sim_node()] - NetworkC$wa[sim_node()] / 1000 * 1000) * 10;
              NetworkC$wb[sim_node()] = (NetworkC$wb[sim_node()] - NetworkC$wb[sim_node()] / 1000 * 1000) * 10;
              sim_log_debug(823U, "Forward", "wa1= %d.\n", NetworkC$wa[sim_node()]);
              sim_log_debug(824U, "Forward", "wb1= %d.\n", NetworkC$wb[sim_node()]);

              NetworkC$ws1[sim_node()] = NetworkC$weishu(NetworkC$wa[sim_node()]);
              NetworkC$ws2[sim_node()] = NetworkC$weishu(NetworkC$wb[sim_node()]);
              NetworkC$flag[sim_node()] = 1;
            }

          NetworkC$wa2[sim_node()] = (float )NetworkC$wa[sim_node()] / 10000;
          NetworkC$wb2[sim_node()] = (float )NetworkC$wb[sim_node()] / 10000;

          sim_log_debug(825U, "Forward", "wa2= %f.\n", NetworkC$wa2[sim_node()]);
          sim_log_debug(826U, "Forward", "wb2= %f.\n", NetworkC$wb2[sim_node()]);

          __nesc_hton_uint16(temppkt->a.nxdata, (int )(NetworkC$wa2[sim_node()] * NetworkC$z[sim_node()]));
          __nesc_hton_uint16(temppkt->b.nxdata, (int )(NetworkC$wb2[sim_node()] * NetworkC$z[sim_node()]));
          if (NetworkC$flag[sim_node()] == 0) {
              __nesc_hton_uint16(temppkt->n1.nxdata, __nesc_ntoh_uint16(btrpkt->n1.nxdata));
              __nesc_hton_uint16(temppkt->n2.nxdata, __nesc_ntoh_uint16(btrpkt->n2.nxdata));
              __nesc_hton_uint16(temppkt->n3.nxdata, __nesc_ntoh_uint16(btrpkt->n3.nxdata));
              __nesc_hton_uint16(temppkt->n4.nxdata, __nesc_ntoh_uint16(btrpkt->n4.nxdata));
              __nesc_hton_uint16(temppkt->n5.nxdata, __nesc_ntoh_uint16(btrpkt->n5.nxdata));
              __nesc_hton_uint16(temppkt->n6.nxdata, __nesc_ntoh_uint16(btrpkt->n6.nxdata));
            }
          else 
#line 3376
            {
              NetworkC$pdflag(&NetworkC$flag[sim_node()], &NetworkC$flag1[sim_node()], &NetworkC$flag2[sim_node()], &NetworkC$flag3[sim_node()], &NetworkC$flag4[sim_node()], &NetworkC$flag5[sim_node()], &NetworkC$flag6[sim_node()], btrpkt, temppkt);
            }
          sim_log_debug(827U, "Forward", "temppkt->n1= %d.\n", __nesc_ntoh_uint16(temppkt->n1.nxdata));
          sim_log_debug(828U, "Forward", "temppkt->n2= %d.\n", __nesc_ntoh_uint16(temppkt->n2.nxdata));
          sim_log_debug(829U, "Forward", "temppkt->n3= %d.\n", __nesc_ntoh_uint16(temppkt->n3.nxdata));
          sim_log_debug(830U, "Forward", "temppkt->n4= %d.\n", __nesc_ntoh_uint16(temppkt->n4.nxdata));
          sim_log_debug(831U, "Forward", "temppkt->n5= %d.\n", __nesc_ntoh_uint16(temppkt->n5.nxdata));
          sim_log_debug(832U, "Forward", "temppkt->n6= %d.\n", __nesc_ntoh_uint16(temppkt->n6.nxdata));

          sim_log_debug(833U, "Forward", "m16-15= %f.\n", NetworkC$m[sim_node()]);
          sim_log_debug(834U, "Forward", "n16-15= %f.\n", NetworkC$n[sim_node()]);
          sim_log_debug(835U, "Forward", "a16-15= %d.\n", __nesc_ntoh_uint16(temppkt->a.nxdata));
          sim_log_debug(836U, "Forward", "b16-15= %d.\n", __nesc_ntoh_uint16(temppkt->b.nxdata));

          __nesc_hton_uint16(temppkt->nodeid.nxdata, TOS_NODE_ID);
          __nesc_hton_uint16(temppkt->sourceid.nxdata, __nesc_ntoh_uint16(btrpkt->sourceid.nxdata));
          __nesc_hton_uint16(temppkt->count.nxdata, __nesc_ntoh_uint16(btrpkt->count.nxdata));
          if (!NetworkC$busy[sim_node()]) {
              if (NetworkC$AMSend$send(AM_BROADCAST_ADDR, &NetworkC$pkt[sim_node()], sizeof(NetworkMsg )) == SUCCESS) {
                  NetworkC$busy[sim_node()] = TRUE;
                }
            }
        }


      if (TOS_NODE_ID == 16) {
          sim_log_debug(837U, "Forward", "r172916= %d.\n", NetworkC$r172916[sim_node()]);
          sim_log_debug(838U, "Forward", "r1716= %d.\n", NetworkC$r1716[sim_node()]);
          sim_log_debug(839U, "Forward", "r2916= %d.\n", NetworkC$r2916[sim_node()]);
          sim_log_debug(840U, "Forward", "s16[0]= %f.\n", NetworkC$s16[sim_node()][0]);
          sim_log_debug(841U, "Forward", "s16[1]= %f.\n", NetworkC$s16[sim_node()][1]);
          sim_log_debug(842U, "Forward", "s16[2]= %f.\n", NetworkC$s16[sim_node()][2]);
          sim_log_debug(843U, "Forward", "s16[3]= %f.\n", NetworkC$s16[sim_node()][3]);

          if (__nesc_ntoh_uint16(btrpkt->nodeid.nxdata) == 17) {
              NetworkMsg *temppkt = (NetworkMsg *)NetworkC$Packet$getPayload(&NetworkC$pkt[sim_node()], sizeof(NetworkMsg ));

#line 3413
              NetworkC$ssbm(btrpkt);
              NetworkC$wa[sim_node()] = NetworkC$m[sim_node()] * 10000;
              NetworkC$wb[sim_node()] = NetworkC$n[sim_node()] * 10000;

              NetworkC$ws1[sim_node()] = NetworkC$weishu(NetworkC$wa[sim_node()]);
              NetworkC$ws2[sim_node()] = NetworkC$weishu(NetworkC$wb[sim_node()]);
              sim_log_debug(844U, "Forward", "ws1= %d.\n", NetworkC$ws1[sim_node()]);
              sim_log_debug(845U, "Forward", "ws2= %d.\n", NetworkC$ws2[sim_node()]);
              while (NetworkC$ws1[sim_node()] == NetworkC$ws2[sim_node()] && NetworkC$wa[sim_node()] / 1000 == NetworkC$wb[sim_node()] / 1000) {

                  if ((__nesc_ntoh_uint16(btrpkt->n6.nxdata) == 100 && __nesc_ntoh_uint16(btrpkt->n5.nxdata) != 100 && __nesc_ntoh_uint16(btrpkt->n4.nxdata) != 100 && __nesc_ntoh_uint16(btrpkt->n3.nxdata) != 100 && __nesc_ntoh_uint16(btrpkt->n2.nxdata) != 100 && __nesc_ntoh_uint16(btrpkt->n1.nxdata) != 100) || (__nesc_ntoh_uint16(btrpkt->n6.nxdata) == 100 && NetworkC$flag5[sim_node()] != 0)) {
                      __nesc_hton_uint16(temppkt->n6.nxdata, NetworkC$wa[sim_node()] / 1000);
                      NetworkC$flag6[sim_node()] = 1;
                      sim_log_debug(846U, "Forward", "btrpkt->n1= %d.\n", __nesc_ntoh_uint16(btrpkt->n1.nxdata));
                      sim_log_debug(847U, "Forward", "btrpkt->n2= %d.\n", __nesc_ntoh_uint16(btrpkt->n2.nxdata));
                      sim_log_debug(848U, "Forward", "btrpkt->n3= %d.\n", __nesc_ntoh_uint16(btrpkt->n3.nxdata));
                      sim_log_debug(849U, "Forward", "btrpkt->n4= %d.\n", __nesc_ntoh_uint16(btrpkt->n4.nxdata));
                      sim_log_debug(850U, "Forward", "btrpkt->n5= %d.\n", __nesc_ntoh_uint16(btrpkt->n5.nxdata));
                      sim_log_debug(851U, "Forward", "btrpkt->n6= %d.\n", __nesc_ntoh_uint16(btrpkt->n6.nxdata));
                      sim_log_debug(852U, "Forward", "temppkt6= %d.\n", __nesc_ntoh_uint16(temppkt->n6.nxdata));
                    }
                  else {
#line 3434
                    if ((__nesc_ntoh_uint16(btrpkt->n5.nxdata) == 100 && __nesc_ntoh_uint16(btrpkt->n4.nxdata) != 100 && __nesc_ntoh_uint16(btrpkt->n3.nxdata) != 100 && __nesc_ntoh_uint16(btrpkt->n2.nxdata) != 100 && __nesc_ntoh_uint16(btrpkt->n1.nxdata) != 100) || (__nesc_ntoh_uint16(btrpkt->n5.nxdata) == 100 && NetworkC$flag4[sim_node()] != 0)) {
                        __nesc_hton_uint16(temppkt->n5.nxdata, NetworkC$wa[sim_node()] / 1000);
                        NetworkC$flag5[sim_node()] = 1;
                        sim_log_debug(853U, "Forward", "temppkt5= %d.\n", __nesc_ntoh_uint16(temppkt->n5.nxdata));
                      }
                    else {
#line 3439
                      if ((__nesc_ntoh_uint16(btrpkt->n4.nxdata) == 100 && __nesc_ntoh_uint16(btrpkt->n3.nxdata) != 100 && __nesc_ntoh_uint16(btrpkt->n2.nxdata) != 100 && __nesc_ntoh_uint16(btrpkt->n1.nxdata) != 100) || (__nesc_ntoh_uint16(btrpkt->n4.nxdata) == 100 && NetworkC$flag3[sim_node()] != 0)) {
                          __nesc_hton_uint16(temppkt->n4.nxdata, NetworkC$wa[sim_node()] / 1000);
                          NetworkC$flag4[sim_node()] = 1;
                          sim_log_debug(854U, "Forward", "temppkt4= %d.\n", __nesc_ntoh_uint16(temppkt->n4.nxdata));
                        }
                      else {
#line 3444
                        if ((__nesc_ntoh_uint16(btrpkt->n3.nxdata) == 100 && __nesc_ntoh_uint16(btrpkt->n2.nxdata) != 100 && __nesc_ntoh_uint16(btrpkt->n1.nxdata) != 100) || (__nesc_ntoh_uint16(btrpkt->n3.nxdata) == 100 && NetworkC$flag2[sim_node()] != 0)) {
                            __nesc_hton_uint16(temppkt->n3.nxdata, NetworkC$wa[sim_node()] / 1000);
                            NetworkC$flag3[sim_node()] = 1;
                            sim_log_debug(855U, "Forward", "temppkt3= %d.\n", __nesc_ntoh_uint16(temppkt->n3.nxdata));
                          }
                        else {
#line 3449
                          if ((__nesc_ntoh_uint16(btrpkt->n2.nxdata) == 100 && __nesc_ntoh_uint16(btrpkt->n1.nxdata) != 100) || (__nesc_ntoh_uint16(btrpkt->n2.nxdata) == 100 && NetworkC$flag1[sim_node()] != 0)) {
                              __nesc_hton_uint16(temppkt->n2.nxdata, NetworkC$wa[sim_node()] / 1000);
                              NetworkC$flag2[sim_node()] = 1;
                              sim_log_debug(856U, "Forward", "temppkt2= %d.\n", __nesc_ntoh_uint16(temppkt->n2.nxdata));
                            }
                          else {
                            if (__nesc_ntoh_uint16(btrpkt->n1.nxdata) == 100) {
                                __nesc_hton_uint16(temppkt->n1.nxdata, NetworkC$wa[sim_node()] / 1000);
                                NetworkC$flag1[sim_node()] = 1;
                                sim_log_debug(857U, "Forward", "temppkt1= %d.\n", __nesc_ntoh_uint16(temppkt->n1.nxdata));
                              }
                            }
                          }
                        }
                      }
                    }
#line 3461
                  NetworkC$wa[sim_node()] = (NetworkC$wa[sim_node()] - NetworkC$wa[sim_node()] / 1000 * 1000) * 10;
                  NetworkC$wb[sim_node()] = (NetworkC$wb[sim_node()] - NetworkC$wb[sim_node()] / 1000 * 1000) * 10;
                  sim_log_debug(858U, "Forward", "wa1= %d.\n", NetworkC$wa[sim_node()]);
                  sim_log_debug(859U, "Forward", "wb1= %d.\n", NetworkC$wb[sim_node()]);

                  NetworkC$ws1[sim_node()] = NetworkC$weishu(NetworkC$wa[sim_node()]);
                  NetworkC$ws2[sim_node()] = NetworkC$weishu(NetworkC$wb[sim_node()]);
                  NetworkC$flag[sim_node()] = 1;
                }

              NetworkC$wa2[sim_node()] = (float )NetworkC$wa[sim_node()] / 10000;
              NetworkC$wb2[sim_node()] = (float )NetworkC$wb[sim_node()] / 10000;

              sim_log_debug(860U, "Forward", "wa2= %f.\n", NetworkC$wa2[sim_node()]);
              sim_log_debug(861U, "Forward", "wb2= %f.\n", NetworkC$wb2[sim_node()]);

              __nesc_hton_uint16(temppkt->a.nxdata, (int )(NetworkC$wa2[sim_node()] * NetworkC$z[sim_node()]));
              __nesc_hton_uint16(temppkt->b.nxdata, (int )(NetworkC$wb2[sim_node()] * NetworkC$z[sim_node()]));
              if (NetworkC$flag[sim_node()] == 0) {
                  __nesc_hton_uint16(temppkt->n1.nxdata, __nesc_ntoh_uint16(btrpkt->n1.nxdata));
                  __nesc_hton_uint16(temppkt->n2.nxdata, __nesc_ntoh_uint16(btrpkt->n2.nxdata));
                  __nesc_hton_uint16(temppkt->n3.nxdata, __nesc_ntoh_uint16(btrpkt->n3.nxdata));
                  __nesc_hton_uint16(temppkt->n4.nxdata, __nesc_ntoh_uint16(btrpkt->n4.nxdata));
                  __nesc_hton_uint16(temppkt->n5.nxdata, __nesc_ntoh_uint16(btrpkt->n5.nxdata));
                  __nesc_hton_uint16(temppkt->n6.nxdata, __nesc_ntoh_uint16(btrpkt->n6.nxdata));
                }
              else 
#line 3486
                {
                  NetworkC$pdflag(&NetworkC$flag[sim_node()], &NetworkC$flag1[sim_node()], &NetworkC$flag2[sim_node()], &NetworkC$flag3[sim_node()], &NetworkC$flag4[sim_node()], &NetworkC$flag5[sim_node()], &NetworkC$flag6[sim_node()], btrpkt, temppkt);
                }
              sim_log_debug(862U, "Forward", "temppkt->n1= %d.\n", __nesc_ntoh_uint16(temppkt->n1.nxdata));
              sim_log_debug(863U, "Forward", "temppkt->n2= %d.\n", __nesc_ntoh_uint16(temppkt->n2.nxdata));
              sim_log_debug(864U, "Forward", "temppkt->n3= %d.\n", __nesc_ntoh_uint16(temppkt->n3.nxdata));
              sim_log_debug(865U, "Forward", "temppkt->n4= %d.\n", __nesc_ntoh_uint16(temppkt->n4.nxdata));
              sim_log_debug(866U, "Forward", "temppkt->n5= %d.\n", __nesc_ntoh_uint16(temppkt->n5.nxdata));
              sim_log_debug(867U, "Forward", "temppkt->n6= %d.\n", __nesc_ntoh_uint16(temppkt->n6.nxdata));

              sim_log_debug(868U, "Forward", "m17-16= %f.\n", NetworkC$m[sim_node()]);
              sim_log_debug(869U, "Forward", "n17-16= %f.\n", NetworkC$n[sim_node()]);
              sim_log_debug(870U, "Forward", "a17-16= %d.\n", __nesc_ntoh_uint16(temppkt->a.nxdata));
              sim_log_debug(871U, "Forward", "b17-16= %d.\n", __nesc_ntoh_uint16(temppkt->b.nxdata));

              __nesc_hton_uint16(temppkt->nodeid.nxdata, TOS_NODE_ID);
              __nesc_hton_uint16(temppkt->sourceid.nxdata, __nesc_ntoh_uint16(btrpkt->sourceid.nxdata));
              __nesc_hton_uint16(temppkt->count.nxdata, __nesc_ntoh_uint16(btrpkt->count.nxdata));
              if (!NetworkC$busy[sim_node()]) {
                  if (NetworkC$AMSend$send(AM_BROADCAST_ADDR, &NetworkC$pkt[sim_node()], sizeof(NetworkMsg )) == SUCCESS) {
                      NetworkC$busy[sim_node()] = TRUE;
                    }
                }
            }
          if (__nesc_ntoh_uint16(btrpkt->nodeid.nxdata) == 29) {
              NetworkMsg *temppkt = (NetworkMsg *)NetworkC$Packet$getPayload(&NetworkC$pkt[sim_node()], sizeof(NetworkMsg ));

#line 3512
              NetworkC$ssbm(btrpkt);
              NetworkC$wa[sim_node()] = NetworkC$m[sim_node()] * 10000;
              NetworkC$wb[sim_node()] = NetworkC$n[sim_node()] * 10000;

              NetworkC$ws1[sim_node()] = NetworkC$weishu(NetworkC$wa[sim_node()]);
              NetworkC$ws2[sim_node()] = NetworkC$weishu(NetworkC$wb[sim_node()]);
              sim_log_debug(872U, "Forward", "ws1= %d.\n", NetworkC$ws1[sim_node()]);
              sim_log_debug(873U, "Forward", "ws2= %d.\n", NetworkC$ws2[sim_node()]);
              while (NetworkC$ws1[sim_node()] == NetworkC$ws2[sim_node()] && NetworkC$wa[sim_node()] / 1000 == NetworkC$wb[sim_node()] / 1000) {

                  if ((__nesc_ntoh_uint16(btrpkt->n6.nxdata) == 100 && __nesc_ntoh_uint16(btrpkt->n5.nxdata) != 100 && __nesc_ntoh_uint16(btrpkt->n4.nxdata) != 100 && __nesc_ntoh_uint16(btrpkt->n3.nxdata) != 100 && __nesc_ntoh_uint16(btrpkt->n2.nxdata) != 100 && __nesc_ntoh_uint16(btrpkt->n1.nxdata) != 100) || (__nesc_ntoh_uint16(btrpkt->n6.nxdata) == 100 && NetworkC$flag5[sim_node()] != 0)) {
                      __nesc_hton_uint16(temppkt->n6.nxdata, NetworkC$wa[sim_node()] / 1000);
                      NetworkC$flag6[sim_node()] = 1;
                      sim_log_debug(874U, "Forward", "btrpkt->n1= %d.\n", __nesc_ntoh_uint16(btrpkt->n1.nxdata));
                      sim_log_debug(875U, "Forward", "btrpkt->n2= %d.\n", __nesc_ntoh_uint16(btrpkt->n2.nxdata));
                      sim_log_debug(876U, "Forward", "btrpkt->n3= %d.\n", __nesc_ntoh_uint16(btrpkt->n3.nxdata));
                      sim_log_debug(877U, "Forward", "btrpkt->n4= %d.\n", __nesc_ntoh_uint16(btrpkt->n4.nxdata));
                      sim_log_debug(878U, "Forward", "btrpkt->n5= %d.\n", __nesc_ntoh_uint16(btrpkt->n5.nxdata));
                      sim_log_debug(879U, "Forward", "btrpkt->n6= %d.\n", __nesc_ntoh_uint16(btrpkt->n6.nxdata));
                      sim_log_debug(880U, "Forward", "temppkt6= %d.\n", __nesc_ntoh_uint16(temppkt->n6.nxdata));
                    }
                  else {
#line 3533
                    if ((__nesc_ntoh_uint16(btrpkt->n5.nxdata) == 100 && __nesc_ntoh_uint16(btrpkt->n4.nxdata) != 100 && __nesc_ntoh_uint16(btrpkt->n3.nxdata) != 100 && __nesc_ntoh_uint16(btrpkt->n2.nxdata) != 100 && __nesc_ntoh_uint16(btrpkt->n1.nxdata) != 100) || (__nesc_ntoh_uint16(btrpkt->n5.nxdata) == 100 && NetworkC$flag4[sim_node()] != 0)) {
                        __nesc_hton_uint16(temppkt->n5.nxdata, NetworkC$wa[sim_node()] / 1000);
                        NetworkC$flag5[sim_node()] = 1;
                        sim_log_debug(881U, "Forward", "temppkt5= %d.\n", __nesc_ntoh_uint16(temppkt->n5.nxdata));
                      }
                    else {
#line 3538
                      if ((__nesc_ntoh_uint16(btrpkt->n4.nxdata) == 100 && __nesc_ntoh_uint16(btrpkt->n3.nxdata) != 100 && __nesc_ntoh_uint16(btrpkt->n2.nxdata) != 100 && __nesc_ntoh_uint16(btrpkt->n1.nxdata) != 100) || (__nesc_ntoh_uint16(btrpkt->n4.nxdata) == 100 && NetworkC$flag3[sim_node()] != 0)) {
                          __nesc_hton_uint16(temppkt->n4.nxdata, NetworkC$wa[sim_node()] / 1000);
                          NetworkC$flag4[sim_node()] = 1;
                          sim_log_debug(882U, "Forward", "temppkt4= %d.\n", __nesc_ntoh_uint16(temppkt->n4.nxdata));
                        }
                      else {
#line 3543
                        if ((__nesc_ntoh_uint16(btrpkt->n3.nxdata) == 100 && __nesc_ntoh_uint16(btrpkt->n2.nxdata) != 100 && __nesc_ntoh_uint16(btrpkt->n1.nxdata) != 100) || (__nesc_ntoh_uint16(btrpkt->n3.nxdata) == 100 && NetworkC$flag2[sim_node()] != 0)) {
                            __nesc_hton_uint16(temppkt->n3.nxdata, NetworkC$wa[sim_node()] / 1000);
                            NetworkC$flag3[sim_node()] = 1;
                            sim_log_debug(883U, "Forward", "temppkt3= %d.\n", __nesc_ntoh_uint16(temppkt->n3.nxdata));
                          }
                        else {
#line 3548
                          if ((__nesc_ntoh_uint16(btrpkt->n2.nxdata) == 100 && __nesc_ntoh_uint16(btrpkt->n1.nxdata) != 100) || (__nesc_ntoh_uint16(btrpkt->n2.nxdata) == 100 && NetworkC$flag1[sim_node()] != 0)) {
                              __nesc_hton_uint16(temppkt->n2.nxdata, NetworkC$wa[sim_node()] / 1000);
                              NetworkC$flag2[sim_node()] = 1;
                              sim_log_debug(884U, "Forward", "temppkt2= %d.\n", __nesc_ntoh_uint16(temppkt->n2.nxdata));
                            }
                          else {
                            if (__nesc_ntoh_uint16(btrpkt->n1.nxdata) == 100) {
                                __nesc_hton_uint16(temppkt->n1.nxdata, NetworkC$wa[sim_node()] / 1000);
                                NetworkC$flag1[sim_node()] = 1;
                                sim_log_debug(885U, "Forward", "temppkt1= %d.\n", __nesc_ntoh_uint16(temppkt->n1.nxdata));
                              }
                            }
                          }
                        }
                      }
                    }
#line 3560
                  NetworkC$wa[sim_node()] = (NetworkC$wa[sim_node()] - NetworkC$wa[sim_node()] / 1000 * 1000) * 10;
                  NetworkC$wb[sim_node()] = (NetworkC$wb[sim_node()] - NetworkC$wb[sim_node()] / 1000 * 1000) * 10;
                  sim_log_debug(886U, "Forward", "wa1= %d.\n", NetworkC$wa[sim_node()]);
                  sim_log_debug(887U, "Forward", "wb1= %d.\n", NetworkC$wb[sim_node()]);

                  NetworkC$ws1[sim_node()] = NetworkC$weishu(NetworkC$wa[sim_node()]);
                  NetworkC$ws2[sim_node()] = NetworkC$weishu(NetworkC$wb[sim_node()]);
                  NetworkC$flag[sim_node()] = 1;
                }

              NetworkC$wa2[sim_node()] = (float )NetworkC$wa[sim_node()] / 10000;
              NetworkC$wb2[sim_node()] = (float )NetworkC$wb[sim_node()] / 10000;

              sim_log_debug(888U, "Forward", "wa2= %f.\n", NetworkC$wa2[sim_node()]);
              sim_log_debug(889U, "Forward", "wb2= %f.\n", NetworkC$wb2[sim_node()]);

              __nesc_hton_uint16(temppkt->a.nxdata, (int )(NetworkC$wa2[sim_node()] * NetworkC$z[sim_node()]));
              __nesc_hton_uint16(temppkt->b.nxdata, (int )(NetworkC$wb2[sim_node()] * NetworkC$z[sim_node()]));
              if (NetworkC$flag[sim_node()] == 0) {
                  __nesc_hton_uint16(temppkt->n1.nxdata, __nesc_ntoh_uint16(btrpkt->n1.nxdata));
                  __nesc_hton_uint16(temppkt->n2.nxdata, __nesc_ntoh_uint16(btrpkt->n2.nxdata));
                  __nesc_hton_uint16(temppkt->n3.nxdata, __nesc_ntoh_uint16(btrpkt->n3.nxdata));
                  __nesc_hton_uint16(temppkt->n4.nxdata, __nesc_ntoh_uint16(btrpkt->n4.nxdata));
                  __nesc_hton_uint16(temppkt->n5.nxdata, __nesc_ntoh_uint16(btrpkt->n5.nxdata));
                  __nesc_hton_uint16(temppkt->n6.nxdata, __nesc_ntoh_uint16(btrpkt->n6.nxdata));
                }
              else 
#line 3585
                {
                  NetworkC$pdflag(&NetworkC$flag[sim_node()], &NetworkC$flag1[sim_node()], &NetworkC$flag2[sim_node()], &NetworkC$flag3[sim_node()], &NetworkC$flag4[sim_node()], &NetworkC$flag5[sim_node()], &NetworkC$flag6[sim_node()], btrpkt, temppkt);
                }
              sim_log_debug(890U, "Forward", "temppkt->n1= %d.\n", __nesc_ntoh_uint16(temppkt->n1.nxdata));
              sim_log_debug(891U, "Forward", "temppkt->n2= %d.\n", __nesc_ntoh_uint16(temppkt->n2.nxdata));
              sim_log_debug(892U, "Forward", "temppkt->n3= %d.\n", __nesc_ntoh_uint16(temppkt->n3.nxdata));
              sim_log_debug(893U, "Forward", "temppkt->n4= %d.\n", __nesc_ntoh_uint16(temppkt->n4.nxdata));
              sim_log_debug(894U, "Forward", "temppkt->n5= %d.\n", __nesc_ntoh_uint16(temppkt->n5.nxdata));
              sim_log_debug(895U, "Forward", "temppkt->n6= %d.\n", __nesc_ntoh_uint16(temppkt->n6.nxdata));

              sim_log_debug(896U, "Forward", "m29-16= %f.\n", NetworkC$m[sim_node()]);
              sim_log_debug(897U, "Forward", "n29-16= %f.\n", NetworkC$n[sim_node()]);
              sim_log_debug(898U, "Forward", "a29-16= %d.\n", __nesc_ntoh_uint16(temppkt->a.nxdata));
              sim_log_debug(899U, "Forward", "b29-16= %d.\n", __nesc_ntoh_uint16(temppkt->b.nxdata));

              __nesc_hton_uint16(temppkt->nodeid.nxdata, TOS_NODE_ID);
              __nesc_hton_uint16(temppkt->sourceid.nxdata, __nesc_ntoh_uint16(btrpkt->sourceid.nxdata));
              __nesc_hton_uint16(temppkt->count.nxdata, __nesc_ntoh_uint16(btrpkt->count.nxdata));
              if (!NetworkC$busy[sim_node()]) {
                  if (NetworkC$AMSend$send(AM_BROADCAST_ADDR, &NetworkC$pkt[sim_node()], sizeof(NetworkMsg )) == SUCCESS) {
                      NetworkC$busy[sim_node()] = TRUE;
                    }
                }
            }
        }

      if (TOS_NODE_ID == 17 && __nesc_ntoh_uint16(btrpkt->nodeid.nxdata) == 18) {
          NetworkMsg *temppkt = (NetworkMsg *)NetworkC$Packet$getPayload(&NetworkC$pkt[sim_node()], sizeof(NetworkMsg ));

#line 3613
          sim_log_debug(900U, "Forward", "r1817= %d.\n", NetworkC$r1817[sim_node()]);
          NetworkC$ssbm(btrpkt);
          NetworkC$wa[sim_node()] = NetworkC$m[sim_node()] * 10000;
          NetworkC$wb[sim_node()] = NetworkC$n[sim_node()] * 10000;

          NetworkC$ws1[sim_node()] = NetworkC$weishu(NetworkC$wa[sim_node()]);
          NetworkC$ws2[sim_node()] = NetworkC$weishu(NetworkC$wb[sim_node()]);
          sim_log_debug(901U, "Forward", "ws1= %d.\n", NetworkC$ws1[sim_node()]);
          sim_log_debug(902U, "Forward", "ws2= %d.\n", NetworkC$ws2[sim_node()]);
          while (NetworkC$ws1[sim_node()] == NetworkC$ws2[sim_node()] && NetworkC$wa[sim_node()] / 1000 == NetworkC$wb[sim_node()] / 1000) {

              if ((__nesc_ntoh_uint16(btrpkt->n6.nxdata) == 100 && __nesc_ntoh_uint16(btrpkt->n5.nxdata) != 100 && __nesc_ntoh_uint16(btrpkt->n4.nxdata) != 100 && __nesc_ntoh_uint16(btrpkt->n3.nxdata) != 100 && __nesc_ntoh_uint16(btrpkt->n2.nxdata) != 100 && __nesc_ntoh_uint16(btrpkt->n1.nxdata) != 100) || (__nesc_ntoh_uint16(btrpkt->n6.nxdata) == 100 && NetworkC$flag5[sim_node()] != 0)) {
                  __nesc_hton_uint16(temppkt->n6.nxdata, NetworkC$wa[sim_node()] / 1000);
                  NetworkC$flag6[sim_node()] = 1;
                  sim_log_debug(903U, "Forward", "btrpkt->n1= %d.\n", __nesc_ntoh_uint16(btrpkt->n1.nxdata));
                  sim_log_debug(904U, "Forward", "btrpkt->n2= %d.\n", __nesc_ntoh_uint16(btrpkt->n2.nxdata));
                  sim_log_debug(905U, "Forward", "btrpkt->n3= %d.\n", __nesc_ntoh_uint16(btrpkt->n3.nxdata));
                  sim_log_debug(906U, "Forward", "btrpkt->n4= %d.\n", __nesc_ntoh_uint16(btrpkt->n4.nxdata));
                  sim_log_debug(907U, "Forward", "btrpkt->n5= %d.\n", __nesc_ntoh_uint16(btrpkt->n5.nxdata));
                  sim_log_debug(908U, "Forward", "btrpkt->n6= %d.\n", __nesc_ntoh_uint16(btrpkt->n6.nxdata));
                  sim_log_debug(909U, "Forward", "temppkt6= %d.\n", __nesc_ntoh_uint16(temppkt->n6.nxdata));
                }
              else {
#line 3635
                if ((__nesc_ntoh_uint16(btrpkt->n5.nxdata) == 100 && __nesc_ntoh_uint16(btrpkt->n4.nxdata) != 100 && __nesc_ntoh_uint16(btrpkt->n3.nxdata) != 100 && __nesc_ntoh_uint16(btrpkt->n2.nxdata) != 100 && __nesc_ntoh_uint16(btrpkt->n1.nxdata) != 100) || (__nesc_ntoh_uint16(btrpkt->n5.nxdata) == 100 && NetworkC$flag4[sim_node()] != 0)) {
                    __nesc_hton_uint16(temppkt->n5.nxdata, NetworkC$wa[sim_node()] / 1000);
                    NetworkC$flag5[sim_node()] = 1;
                    sim_log_debug(910U, "Forward", "temppkt5= %d.\n", __nesc_ntoh_uint16(temppkt->n5.nxdata));
                  }
                else {
#line 3640
                  if ((__nesc_ntoh_uint16(btrpkt->n4.nxdata) == 100 && __nesc_ntoh_uint16(btrpkt->n3.nxdata) != 100 && __nesc_ntoh_uint16(btrpkt->n2.nxdata) != 100 && __nesc_ntoh_uint16(btrpkt->n1.nxdata) != 100) || (__nesc_ntoh_uint16(btrpkt->n4.nxdata) == 100 && NetworkC$flag3[sim_node()] != 0)) {
                      __nesc_hton_uint16(temppkt->n4.nxdata, NetworkC$wa[sim_node()] / 1000);
                      NetworkC$flag4[sim_node()] = 1;
                      sim_log_debug(911U, "Forward", "temppkt4= %d.\n", __nesc_ntoh_uint16(temppkt->n4.nxdata));
                    }
                  else {
#line 3645
                    if ((__nesc_ntoh_uint16(btrpkt->n3.nxdata) == 100 && __nesc_ntoh_uint16(btrpkt->n2.nxdata) != 100 && __nesc_ntoh_uint16(btrpkt->n1.nxdata) != 100) || (__nesc_ntoh_uint16(btrpkt->n3.nxdata) == 100 && NetworkC$flag2[sim_node()] != 0)) {
                        __nesc_hton_uint16(temppkt->n3.nxdata, NetworkC$wa[sim_node()] / 1000);
                        NetworkC$flag3[sim_node()] = 1;
                        sim_log_debug(912U, "Forward", "temppkt3= %d.\n", __nesc_ntoh_uint16(temppkt->n3.nxdata));
                      }
                    else {
#line 3650
                      if ((__nesc_ntoh_uint16(btrpkt->n2.nxdata) == 100 && __nesc_ntoh_uint16(btrpkt->n1.nxdata) != 100) || (__nesc_ntoh_uint16(btrpkt->n2.nxdata) == 100 && NetworkC$flag1[sim_node()] != 0)) {
                          __nesc_hton_uint16(temppkt->n2.nxdata, NetworkC$wa[sim_node()] / 1000);
                          NetworkC$flag2[sim_node()] = 1;
                          sim_log_debug(913U, "Forward", "temppkt2= %d.\n", __nesc_ntoh_uint16(temppkt->n2.nxdata));
                        }
                      else {
                        if (__nesc_ntoh_uint16(btrpkt->n1.nxdata) == 100) {
                            __nesc_hton_uint16(temppkt->n1.nxdata, NetworkC$wa[sim_node()] / 1000);
                            NetworkC$flag1[sim_node()] = 1;
                            sim_log_debug(914U, "Forward", "temppkt1= %d.\n", __nesc_ntoh_uint16(temppkt->n1.nxdata));
                          }
                        }
                      }
                    }
                  }
                }
#line 3662
              NetworkC$wa[sim_node()] = (NetworkC$wa[sim_node()] - NetworkC$wa[sim_node()] / 1000 * 1000) * 10;
              NetworkC$wb[sim_node()] = (NetworkC$wb[sim_node()] - NetworkC$wb[sim_node()] / 1000 * 1000) * 10;
              sim_log_debug(915U, "Forward", "wa1= %d.\n", NetworkC$wa[sim_node()]);
              sim_log_debug(916U, "Forward", "wb1= %d.\n", NetworkC$wb[sim_node()]);

              NetworkC$ws1[sim_node()] = NetworkC$weishu(NetworkC$wa[sim_node()]);
              NetworkC$ws2[sim_node()] = NetworkC$weishu(NetworkC$wb[sim_node()]);
              NetworkC$flag[sim_node()] = 1;
            }

          NetworkC$wa2[sim_node()] = (float )NetworkC$wa[sim_node()] / 10000;
          NetworkC$wb2[sim_node()] = (float )NetworkC$wb[sim_node()] / 10000;

          sim_log_debug(917U, "Forward", "wa2= %f.\n", NetworkC$wa2[sim_node()]);
          sim_log_debug(918U, "Forward", "wb2= %f.\n", NetworkC$wb2[sim_node()]);

          __nesc_hton_uint16(temppkt->a.nxdata, (int )(NetworkC$wa2[sim_node()] * NetworkC$z[sim_node()]));
          __nesc_hton_uint16(temppkt->b.nxdata, (int )(NetworkC$wb2[sim_node()] * NetworkC$z[sim_node()]));
          if (NetworkC$flag[sim_node()] == 0) {
              __nesc_hton_uint16(temppkt->n1.nxdata, __nesc_ntoh_uint16(btrpkt->n1.nxdata));
              __nesc_hton_uint16(temppkt->n2.nxdata, __nesc_ntoh_uint16(btrpkt->n2.nxdata));
              __nesc_hton_uint16(temppkt->n3.nxdata, __nesc_ntoh_uint16(btrpkt->n3.nxdata));
              __nesc_hton_uint16(temppkt->n4.nxdata, __nesc_ntoh_uint16(btrpkt->n4.nxdata));
              __nesc_hton_uint16(temppkt->n5.nxdata, __nesc_ntoh_uint16(btrpkt->n5.nxdata));
              __nesc_hton_uint16(temppkt->n6.nxdata, __nesc_ntoh_uint16(btrpkt->n6.nxdata));
            }
          else 
#line 3687
            {
              NetworkC$pdflag(&NetworkC$flag[sim_node()], &NetworkC$flag1[sim_node()], &NetworkC$flag2[sim_node()], &NetworkC$flag3[sim_node()], &NetworkC$flag4[sim_node()], &NetworkC$flag5[sim_node()], &NetworkC$flag6[sim_node()], btrpkt, temppkt);
            }
          sim_log_debug(919U, "Forward", "temppkt->n1= %d.\n", __nesc_ntoh_uint16(temppkt->n1.nxdata));
          sim_log_debug(920U, "Forward", "temppkt->n2= %d.\n", __nesc_ntoh_uint16(temppkt->n2.nxdata));
          sim_log_debug(921U, "Forward", "temppkt->n3= %d.\n", __nesc_ntoh_uint16(temppkt->n3.nxdata));
          sim_log_debug(922U, "Forward", "temppkt->n4= %d.\n", __nesc_ntoh_uint16(temppkt->n4.nxdata));
          sim_log_debug(923U, "Forward", "temppkt->n5= %d.\n", __nesc_ntoh_uint16(temppkt->n5.nxdata));
          sim_log_debug(924U, "Forward", "temppkt->n6= %d.\n", __nesc_ntoh_uint16(temppkt->n6.nxdata));

          sim_log_debug(925U, "Forward", "m18-17= %f.\n", NetworkC$m[sim_node()]);
          sim_log_debug(926U, "Forward", "n18-17= %f.\n", NetworkC$n[sim_node()]);
          sim_log_debug(927U, "Forward", "a18-17= %d.\n", __nesc_ntoh_uint16(temppkt->a.nxdata));
          sim_log_debug(928U, "Forward", "b18-17= %d.\n", __nesc_ntoh_uint16(temppkt->b.nxdata));

          __nesc_hton_uint16(temppkt->nodeid.nxdata, TOS_NODE_ID);
          __nesc_hton_uint16(temppkt->sourceid.nxdata, __nesc_ntoh_uint16(btrpkt->sourceid.nxdata));
          __nesc_hton_uint16(temppkt->count.nxdata, __nesc_ntoh_uint16(btrpkt->count.nxdata));
          if (!NetworkC$busy[sim_node()]) {
              if (NetworkC$AMSend$send(AM_BROADCAST_ADDR, &NetworkC$pkt[sim_node()], sizeof(NetworkMsg )) == SUCCESS) {
                  NetworkC$busy[sim_node()] = TRUE;
                }
            }
        }


      if (TOS_NODE_ID == 18 && __nesc_ntoh_uint16(btrpkt->nodeid.nxdata) == 19) {
          NetworkMsg *temppkt = (NetworkMsg *)NetworkC$Packet$getPayload(&NetworkC$pkt[sim_node()], sizeof(NetworkMsg ));

#line 3715
          sim_log_debug(929U, "Forward", "r1918= %d.\n", NetworkC$r1918[sim_node()]);
          NetworkC$ssbm(btrpkt);
          NetworkC$wa[sim_node()] = NetworkC$m[sim_node()] * 10000;
          NetworkC$wb[sim_node()] = NetworkC$n[sim_node()] * 10000;

          NetworkC$ws1[sim_node()] = NetworkC$weishu(NetworkC$wa[sim_node()]);
          NetworkC$ws2[sim_node()] = NetworkC$weishu(NetworkC$wb[sim_node()]);
          sim_log_debug(930U, "Forward", "ws1= %d.\n", NetworkC$ws1[sim_node()]);
          sim_log_debug(931U, "Forward", "ws2= %d.\n", NetworkC$ws2[sim_node()]);
          while (NetworkC$ws1[sim_node()] == NetworkC$ws2[sim_node()] && NetworkC$wa[sim_node()] / 1000 == NetworkC$wb[sim_node()] / 1000) {

              if ((__nesc_ntoh_uint16(btrpkt->n6.nxdata) == 100 && __nesc_ntoh_uint16(btrpkt->n5.nxdata) != 100 && __nesc_ntoh_uint16(btrpkt->n4.nxdata) != 100 && __nesc_ntoh_uint16(btrpkt->n3.nxdata) != 100 && __nesc_ntoh_uint16(btrpkt->n2.nxdata) != 100 && __nesc_ntoh_uint16(btrpkt->n1.nxdata) != 100) || (__nesc_ntoh_uint16(btrpkt->n6.nxdata) == 100 && NetworkC$flag5[sim_node()] != 0)) {
                  __nesc_hton_uint16(temppkt->n6.nxdata, NetworkC$wa[sim_node()] / 1000);
                  NetworkC$flag6[sim_node()] = 1;
                  sim_log_debug(932U, "Forward", "btrpkt->n1= %d.\n", __nesc_ntoh_uint16(btrpkt->n1.nxdata));
                  sim_log_debug(933U, "Forward", "btrpkt->n2= %d.\n", __nesc_ntoh_uint16(btrpkt->n2.nxdata));
                  sim_log_debug(934U, "Forward", "btrpkt->n3= %d.\n", __nesc_ntoh_uint16(btrpkt->n3.nxdata));
                  sim_log_debug(935U, "Forward", "btrpkt->n4= %d.\n", __nesc_ntoh_uint16(btrpkt->n4.nxdata));
                  sim_log_debug(936U, "Forward", "btrpkt->n5= %d.\n", __nesc_ntoh_uint16(btrpkt->n5.nxdata));
                  sim_log_debug(937U, "Forward", "btrpkt->n6= %d.\n", __nesc_ntoh_uint16(btrpkt->n6.nxdata));
                  sim_log_debug(938U, "Forward", "temppkt6= %d.\n", __nesc_ntoh_uint16(temppkt->n6.nxdata));
                }
              else {
#line 3737
                if ((__nesc_ntoh_uint16(btrpkt->n5.nxdata) == 100 && __nesc_ntoh_uint16(btrpkt->n4.nxdata) != 100 && __nesc_ntoh_uint16(btrpkt->n3.nxdata) != 100 && __nesc_ntoh_uint16(btrpkt->n2.nxdata) != 100 && __nesc_ntoh_uint16(btrpkt->n1.nxdata) != 100) || (__nesc_ntoh_uint16(btrpkt->n5.nxdata) == 100 && NetworkC$flag4[sim_node()] != 0)) {
                    __nesc_hton_uint16(temppkt->n5.nxdata, NetworkC$wa[sim_node()] / 1000);
                    NetworkC$flag5[sim_node()] = 1;
                    sim_log_debug(939U, "Forward", "temppkt5= %d.\n", __nesc_ntoh_uint16(temppkt->n5.nxdata));
                  }
                else {
#line 3742
                  if ((__nesc_ntoh_uint16(btrpkt->n4.nxdata) == 100 && __nesc_ntoh_uint16(btrpkt->n3.nxdata) != 100 && __nesc_ntoh_uint16(btrpkt->n2.nxdata) != 100 && __nesc_ntoh_uint16(btrpkt->n1.nxdata) != 100) || (__nesc_ntoh_uint16(btrpkt->n4.nxdata) == 100 && NetworkC$flag3[sim_node()] != 0)) {
                      __nesc_hton_uint16(temppkt->n4.nxdata, NetworkC$wa[sim_node()] / 1000);
                      NetworkC$flag4[sim_node()] = 1;
                      sim_log_debug(940U, "Forward", "temppkt4= %d.\n", __nesc_ntoh_uint16(temppkt->n4.nxdata));
                    }
                  else {
#line 3747
                    if ((__nesc_ntoh_uint16(btrpkt->n3.nxdata) == 100 && __nesc_ntoh_uint16(btrpkt->n2.nxdata) != 100 && __nesc_ntoh_uint16(btrpkt->n1.nxdata) != 100) || (__nesc_ntoh_uint16(btrpkt->n3.nxdata) == 100 && NetworkC$flag2[sim_node()] != 0)) {
                        __nesc_hton_uint16(temppkt->n3.nxdata, NetworkC$wa[sim_node()] / 1000);
                        NetworkC$flag3[sim_node()] = 1;
                        sim_log_debug(941U, "Forward", "temppkt3= %d.\n", __nesc_ntoh_uint16(temppkt->n3.nxdata));
                      }
                    else {
#line 3752
                      if ((__nesc_ntoh_uint16(btrpkt->n2.nxdata) == 100 && __nesc_ntoh_uint16(btrpkt->n1.nxdata) != 100) || (__nesc_ntoh_uint16(btrpkt->n2.nxdata) == 100 && NetworkC$flag1[sim_node()] != 0)) {
                          __nesc_hton_uint16(temppkt->n2.nxdata, NetworkC$wa[sim_node()] / 1000);
                          NetworkC$flag2[sim_node()] = 1;
                          sim_log_debug(942U, "Forward", "temppkt2= %d.\n", __nesc_ntoh_uint16(temppkt->n2.nxdata));
                        }
                      else {
                        if (__nesc_ntoh_uint16(btrpkt->n1.nxdata) == 100) {
                            __nesc_hton_uint16(temppkt->n1.nxdata, NetworkC$wa[sim_node()] / 1000);
                            NetworkC$flag1[sim_node()] = 1;
                            sim_log_debug(943U, "Forward", "temppkt1= %d.\n", __nesc_ntoh_uint16(temppkt->n1.nxdata));
                          }
                        }
                      }
                    }
                  }
                }
#line 3764
              NetworkC$wa[sim_node()] = (NetworkC$wa[sim_node()] - NetworkC$wa[sim_node()] / 1000 * 1000) * 10;
              NetworkC$wb[sim_node()] = (NetworkC$wb[sim_node()] - NetworkC$wb[sim_node()] / 1000 * 1000) * 10;
              sim_log_debug(944U, "Forward", "wa1= %d.\n", NetworkC$wa[sim_node()]);
              sim_log_debug(945U, "Forward", "wb1= %d.\n", NetworkC$wb[sim_node()]);

              NetworkC$ws1[sim_node()] = NetworkC$weishu(NetworkC$wa[sim_node()]);
              NetworkC$ws2[sim_node()] = NetworkC$weishu(NetworkC$wb[sim_node()]);
              NetworkC$flag[sim_node()] = 1;
            }

          NetworkC$wa2[sim_node()] = (float )NetworkC$wa[sim_node()] / 10000;
          NetworkC$wb2[sim_node()] = (float )NetworkC$wb[sim_node()] / 10000;

          sim_log_debug(946U, "Forward", "wa2= %f.\n", NetworkC$wa2[sim_node()]);
          sim_log_debug(947U, "Forward", "wb2= %f.\n", NetworkC$wb2[sim_node()]);

          __nesc_hton_uint16(temppkt->a.nxdata, (int )(NetworkC$wa2[sim_node()] * NetworkC$z[sim_node()]));
          __nesc_hton_uint16(temppkt->b.nxdata, (int )(NetworkC$wb2[sim_node()] * NetworkC$z[sim_node()]));
          if (NetworkC$flag[sim_node()] == 0) {
              __nesc_hton_uint16(temppkt->n1.nxdata, __nesc_ntoh_uint16(btrpkt->n1.nxdata));
              __nesc_hton_uint16(temppkt->n2.nxdata, __nesc_ntoh_uint16(btrpkt->n2.nxdata));
              __nesc_hton_uint16(temppkt->n3.nxdata, __nesc_ntoh_uint16(btrpkt->n3.nxdata));
              __nesc_hton_uint16(temppkt->n4.nxdata, __nesc_ntoh_uint16(btrpkt->n4.nxdata));
              __nesc_hton_uint16(temppkt->n5.nxdata, __nesc_ntoh_uint16(btrpkt->n5.nxdata));
              __nesc_hton_uint16(temppkt->n6.nxdata, __nesc_ntoh_uint16(btrpkt->n6.nxdata));
            }
          else 
#line 3789
            {
              NetworkC$pdflag(&NetworkC$flag[sim_node()], &NetworkC$flag1[sim_node()], &NetworkC$flag2[sim_node()], &NetworkC$flag3[sim_node()], &NetworkC$flag4[sim_node()], &NetworkC$flag5[sim_node()], &NetworkC$flag6[sim_node()], btrpkt, temppkt);
            }
          sim_log_debug(948U, "Forward", "temppkt->n1= %d.\n", __nesc_ntoh_uint16(temppkt->n1.nxdata));
          sim_log_debug(949U, "Forward", "temppkt->n2= %d.\n", __nesc_ntoh_uint16(temppkt->n2.nxdata));
          sim_log_debug(950U, "Forward", "temppkt->n3= %d.\n", __nesc_ntoh_uint16(temppkt->n3.nxdata));
          sim_log_debug(951U, "Forward", "temppkt->n4= %d.\n", __nesc_ntoh_uint16(temppkt->n4.nxdata));
          sim_log_debug(952U, "Forward", "temppkt->n5= %d.\n", __nesc_ntoh_uint16(temppkt->n5.nxdata));
          sim_log_debug(953U, "Forward", "temppkt->n6= %d.\n", __nesc_ntoh_uint16(temppkt->n6.nxdata));

          sim_log_debug(954U, "Forward", "m19-18= %f.\n", NetworkC$m[sim_node()]);
          sim_log_debug(955U, "Forward", "n19-18= %f.\n", NetworkC$n[sim_node()]);
          sim_log_debug(956U, "Forward", "a19-18= %d.\n", __nesc_ntoh_uint16(temppkt->a.nxdata));
          sim_log_debug(957U, "Forward", "b19-18= %d.\n", __nesc_ntoh_uint16(temppkt->b.nxdata));

          __nesc_hton_uint16(temppkt->nodeid.nxdata, TOS_NODE_ID);
          __nesc_hton_uint16(temppkt->sourceid.nxdata, __nesc_ntoh_uint16(btrpkt->sourceid.nxdata));
          __nesc_hton_uint16(temppkt->count.nxdata, __nesc_ntoh_uint16(btrpkt->count.nxdata));
          if (!NetworkC$busy[sim_node()]) {
              if (NetworkC$AMSend$send(AM_BROADCAST_ADDR, &NetworkC$pkt[sim_node()], sizeof(NetworkMsg )) == SUCCESS) {
                  NetworkC$busy[sim_node()] = TRUE;
                }
            }
        }


      if (TOS_NODE_ID == 19) {
          sim_log_debug(958U, "Forward", "r203219= %d.\n", NetworkC$r203219[sim_node()]);
          sim_log_debug(959U, "Forward", "r2019= %d.\n", NetworkC$r2019[sim_node()]);
          sim_log_debug(960U, "Forward", "r3219= %d.\n", NetworkC$r3219[sim_node()]);
          sim_log_debug(961U, "Forward", "s19[0]= %f.\n", NetworkC$s19[sim_node()][0]);
          sim_log_debug(962U, "Forward", "s19[1]= %f.\n", NetworkC$s19[sim_node()][1]);
          sim_log_debug(963U, "Forward", "s19[2]= %f.\n", NetworkC$s19[sim_node()][2]);
          sim_log_debug(964U, "Forward", "s19[3]= %f.\n", NetworkC$s19[sim_node()][3]);

          if (__nesc_ntoh_uint16(btrpkt->nodeid.nxdata) == 20) {
              NetworkMsg *temppkt = (NetworkMsg *)NetworkC$Packet$getPayload(&NetworkC$pkt[sim_node()], sizeof(NetworkMsg ));

              NetworkC$ssbm(btrpkt);
              NetworkC$wa[sim_node()] = NetworkC$m[sim_node()] * 10000;
              NetworkC$wb[sim_node()] = NetworkC$n[sim_node()] * 10000;

              NetworkC$ws1[sim_node()] = NetworkC$weishu(NetworkC$wa[sim_node()]);
              NetworkC$ws2[sim_node()] = NetworkC$weishu(NetworkC$wb[sim_node()]);
              sim_log_debug(965U, "Forward", "ws1= %d.\n", NetworkC$ws1[sim_node()]);
              sim_log_debug(966U, "Forward", "ws2= %d.\n", NetworkC$ws2[sim_node()]);
              while (NetworkC$ws1[sim_node()] == NetworkC$ws2[sim_node()] && NetworkC$wa[sim_node()] / 1000 == NetworkC$wb[sim_node()] / 1000) {

                  if ((__nesc_ntoh_uint16(btrpkt->n6.nxdata) == 100 && __nesc_ntoh_uint16(btrpkt->n5.nxdata) != 100 && __nesc_ntoh_uint16(btrpkt->n4.nxdata) != 100 && __nesc_ntoh_uint16(btrpkt->n3.nxdata) != 100 && __nesc_ntoh_uint16(btrpkt->n2.nxdata) != 100 && __nesc_ntoh_uint16(btrpkt->n1.nxdata) != 100) || (__nesc_ntoh_uint16(btrpkt->n6.nxdata) == 100 && NetworkC$flag5[sim_node()] != 0)) {
                      __nesc_hton_uint16(temppkt->n6.nxdata, NetworkC$wa[sim_node()] / 1000);
                      NetworkC$flag6[sim_node()] = 1;
                      sim_log_debug(967U, "Forward", "btrpkt->n1= %d.\n", __nesc_ntoh_uint16(btrpkt->n1.nxdata));
                      sim_log_debug(968U, "Forward", "btrpkt->n2= %d.\n", __nesc_ntoh_uint16(btrpkt->n2.nxdata));
                      sim_log_debug(969U, "Forward", "btrpkt->n3= %d.\n", __nesc_ntoh_uint16(btrpkt->n3.nxdata));
                      sim_log_debug(970U, "Forward", "btrpkt->n4= %d.\n", __nesc_ntoh_uint16(btrpkt->n4.nxdata));
                      sim_log_debug(971U, "Forward", "btrpkt->n5= %d.\n", __nesc_ntoh_uint16(btrpkt->n5.nxdata));
                      sim_log_debug(972U, "Forward", "btrpkt->n6= %d.\n", __nesc_ntoh_uint16(btrpkt->n6.nxdata));
                      sim_log_debug(973U, "Forward", "temppkt6= %d.\n", __nesc_ntoh_uint16(temppkt->n6.nxdata));
                    }
                  else {
#line 3848
                    if ((__nesc_ntoh_uint16(btrpkt->n5.nxdata) == 100 && __nesc_ntoh_uint16(btrpkt->n4.nxdata) != 100 && __nesc_ntoh_uint16(btrpkt->n3.nxdata) != 100 && __nesc_ntoh_uint16(btrpkt->n2.nxdata) != 100 && __nesc_ntoh_uint16(btrpkt->n1.nxdata) != 100) || (__nesc_ntoh_uint16(btrpkt->n5.nxdata) == 100 && NetworkC$flag4[sim_node()] != 0)) {
                        __nesc_hton_uint16(temppkt->n5.nxdata, NetworkC$wa[sim_node()] / 1000);
                        NetworkC$flag5[sim_node()] = 1;
                        sim_log_debug(974U, "Forward", "temppkt5= %d.\n", __nesc_ntoh_uint16(temppkt->n5.nxdata));
                      }
                    else {
#line 3853
                      if ((__nesc_ntoh_uint16(btrpkt->n4.nxdata) == 100 && __nesc_ntoh_uint16(btrpkt->n3.nxdata) != 100 && __nesc_ntoh_uint16(btrpkt->n2.nxdata) != 100 && __nesc_ntoh_uint16(btrpkt->n1.nxdata) != 100) || (__nesc_ntoh_uint16(btrpkt->n4.nxdata) == 100 && NetworkC$flag3[sim_node()] != 0)) {
                          __nesc_hton_uint16(temppkt->n4.nxdata, NetworkC$wa[sim_node()] / 1000);
                          NetworkC$flag4[sim_node()] = 1;
                          sim_log_debug(975U, "Forward", "temppkt4= %d.\n", __nesc_ntoh_uint16(temppkt->n4.nxdata));
                        }
                      else {
#line 3858
                        if ((__nesc_ntoh_uint16(btrpkt->n3.nxdata) == 100 && __nesc_ntoh_uint16(btrpkt->n2.nxdata) != 100 && __nesc_ntoh_uint16(btrpkt->n1.nxdata) != 100) || (__nesc_ntoh_uint16(btrpkt->n3.nxdata) == 100 && NetworkC$flag2[sim_node()] != 0)) {
                            __nesc_hton_uint16(temppkt->n3.nxdata, NetworkC$wa[sim_node()] / 1000);
                            NetworkC$flag3[sim_node()] = 1;
                            sim_log_debug(976U, "Forward", "temppkt3= %d.\n", __nesc_ntoh_uint16(temppkt->n3.nxdata));
                          }
                        else {
#line 3863
                          if ((__nesc_ntoh_uint16(btrpkt->n2.nxdata) == 100 && __nesc_ntoh_uint16(btrpkt->n1.nxdata) != 100) || (__nesc_ntoh_uint16(btrpkt->n2.nxdata) == 100 && NetworkC$flag1[sim_node()] != 0)) {
                              __nesc_hton_uint16(temppkt->n2.nxdata, NetworkC$wa[sim_node()] / 1000);
                              NetworkC$flag2[sim_node()] = 1;
                              sim_log_debug(977U, "Forward", "temppkt2= %d.\n", __nesc_ntoh_uint16(temppkt->n2.nxdata));
                            }
                          else {
                            if (__nesc_ntoh_uint16(btrpkt->n1.nxdata) == 100) {
                                __nesc_hton_uint16(temppkt->n1.nxdata, NetworkC$wa[sim_node()] / 1000);
                                NetworkC$flag1[sim_node()] = 1;
                                sim_log_debug(978U, "Forward", "temppkt1= %d.\n", __nesc_ntoh_uint16(temppkt->n1.nxdata));
                              }
                            }
                          }
                        }
                      }
                    }
#line 3875
                  NetworkC$wa[sim_node()] = (NetworkC$wa[sim_node()] - NetworkC$wa[sim_node()] / 1000 * 1000) * 10;
                  NetworkC$wb[sim_node()] = (NetworkC$wb[sim_node()] - NetworkC$wb[sim_node()] / 1000 * 1000) * 10;
                  sim_log_debug(979U, "Forward", "wa1= %d.\n", NetworkC$wa[sim_node()]);
                  sim_log_debug(980U, "Forward", "wb1= %d.\n", NetworkC$wb[sim_node()]);

                  NetworkC$ws1[sim_node()] = NetworkC$weishu(NetworkC$wa[sim_node()]);
                  NetworkC$ws2[sim_node()] = NetworkC$weishu(NetworkC$wb[sim_node()]);
                  NetworkC$flag[sim_node()] = 1;
                }

              NetworkC$wa2[sim_node()] = (float )NetworkC$wa[sim_node()] / 10000;
              NetworkC$wb2[sim_node()] = (float )NetworkC$wb[sim_node()] / 10000;

              sim_log_debug(981U, "Forward", "wa2= %f.\n", NetworkC$wa2[sim_node()]);
              sim_log_debug(982U, "Forward", "wb2= %f.\n", NetworkC$wb2[sim_node()]);

              __nesc_hton_uint16(temppkt->a.nxdata, (int )(NetworkC$wa2[sim_node()] * NetworkC$z[sim_node()]));
              __nesc_hton_uint16(temppkt->b.nxdata, (int )(NetworkC$wb2[sim_node()] * NetworkC$z[sim_node()]));
              if (NetworkC$flag[sim_node()] == 0) {
                  __nesc_hton_uint16(temppkt->n1.nxdata, __nesc_ntoh_uint16(btrpkt->n1.nxdata));
                  __nesc_hton_uint16(temppkt->n2.nxdata, __nesc_ntoh_uint16(btrpkt->n2.nxdata));
                  __nesc_hton_uint16(temppkt->n3.nxdata, __nesc_ntoh_uint16(btrpkt->n3.nxdata));
                  __nesc_hton_uint16(temppkt->n4.nxdata, __nesc_ntoh_uint16(btrpkt->n4.nxdata));
                  __nesc_hton_uint16(temppkt->n5.nxdata, __nesc_ntoh_uint16(btrpkt->n5.nxdata));
                  __nesc_hton_uint16(temppkt->n6.nxdata, __nesc_ntoh_uint16(btrpkt->n6.nxdata));
                }
              else 
#line 3900
                {
                  NetworkC$pdflag(&NetworkC$flag[sim_node()], &NetworkC$flag1[sim_node()], &NetworkC$flag2[sim_node()], &NetworkC$flag3[sim_node()], &NetworkC$flag4[sim_node()], &NetworkC$flag5[sim_node()], &NetworkC$flag6[sim_node()], btrpkt, temppkt);
                }
              sim_log_debug(983U, "Forward", "temppkt->n1= %d.\n", __nesc_ntoh_uint16(temppkt->n1.nxdata));
              sim_log_debug(984U, "Forward", "temppkt->n2= %d.\n", __nesc_ntoh_uint16(temppkt->n2.nxdata));
              sim_log_debug(985U, "Forward", "temppkt->n3= %d.\n", __nesc_ntoh_uint16(temppkt->n3.nxdata));
              sim_log_debug(986U, "Forward", "temppkt->n4= %d.\n", __nesc_ntoh_uint16(temppkt->n4.nxdata));
              sim_log_debug(987U, "Forward", "temppkt->n5= %d.\n", __nesc_ntoh_uint16(temppkt->n5.nxdata));
              sim_log_debug(988U, "Forward", "temppkt->n6= %d.\n", __nesc_ntoh_uint16(temppkt->n6.nxdata));

              sim_log_debug(989U, "Forward", "m20-19= %f.\n", NetworkC$m[sim_node()]);
              sim_log_debug(990U, "Forward", "n20-19= %f.\n", NetworkC$n[sim_node()]);
              sim_log_debug(991U, "Forward", "a20-19= %d.\n", __nesc_ntoh_uint16(temppkt->a.nxdata));
              sim_log_debug(992U, "Forward", "b20-19= %d.\n", __nesc_ntoh_uint16(temppkt->b.nxdata));

              __nesc_hton_uint16(temppkt->nodeid.nxdata, TOS_NODE_ID);
              __nesc_hton_uint16(temppkt->sourceid.nxdata, __nesc_ntoh_uint16(btrpkt->sourceid.nxdata));
              __nesc_hton_uint16(temppkt->count.nxdata, __nesc_ntoh_uint16(btrpkt->count.nxdata));
              if (!NetworkC$busy[sim_node()]) {
                  if (NetworkC$AMSend$send(AM_BROADCAST_ADDR, &NetworkC$pkt[sim_node()], sizeof(NetworkMsg )) == SUCCESS) {
                      NetworkC$busy[sim_node()] = TRUE;
                    }
                }
            }

          if (__nesc_ntoh_uint16(btrpkt->nodeid.nxdata) == 32) {
              NetworkMsg *temppkt = (NetworkMsg *)NetworkC$Packet$getPayload(&NetworkC$pkt[sim_node()], sizeof(NetworkMsg ));

              NetworkC$ssbm(btrpkt);
              NetworkC$wa[sim_node()] = NetworkC$m[sim_node()] * 10000;
              NetworkC$wb[sim_node()] = NetworkC$n[sim_node()] * 10000;

              NetworkC$ws1[sim_node()] = NetworkC$weishu(NetworkC$wa[sim_node()]);
              NetworkC$ws2[sim_node()] = NetworkC$weishu(NetworkC$wb[sim_node()]);
              sim_log_debug(993U, "Forward", "ws1= %d.\n", NetworkC$ws1[sim_node()]);
              sim_log_debug(994U, "Forward", "ws2= %d.\n", NetworkC$ws2[sim_node()]);
              while (NetworkC$ws1[sim_node()] == NetworkC$ws2[sim_node()] && NetworkC$wa[sim_node()] / 1000 == NetworkC$wb[sim_node()] / 1000) {

                  if ((__nesc_ntoh_uint16(btrpkt->n6.nxdata) == 100 && __nesc_ntoh_uint16(btrpkt->n5.nxdata) != 100 && __nesc_ntoh_uint16(btrpkt->n4.nxdata) != 100 && __nesc_ntoh_uint16(btrpkt->n3.nxdata) != 100 && __nesc_ntoh_uint16(btrpkt->n2.nxdata) != 100 && __nesc_ntoh_uint16(btrpkt->n1.nxdata) != 100) || (__nesc_ntoh_uint16(btrpkt->n6.nxdata) == 100 && NetworkC$flag5[sim_node()] != 0)) {
                      __nesc_hton_uint16(temppkt->n6.nxdata, NetworkC$wa[sim_node()] / 1000);
                      NetworkC$flag6[sim_node()] = 1;
                      sim_log_debug(995U, "Forward", "btrpkt->n1= %d.\n", __nesc_ntoh_uint16(btrpkt->n1.nxdata));
                      sim_log_debug(996U, "Forward", "btrpkt->n2= %d.\n", __nesc_ntoh_uint16(btrpkt->n2.nxdata));
                      sim_log_debug(997U, "Forward", "btrpkt->n3= %d.\n", __nesc_ntoh_uint16(btrpkt->n3.nxdata));
                      sim_log_debug(998U, "Forward", "btrpkt->n4= %d.\n", __nesc_ntoh_uint16(btrpkt->n4.nxdata));
                      sim_log_debug(999U, "Forward", "btrpkt->n5= %d.\n", __nesc_ntoh_uint16(btrpkt->n5.nxdata));
                      sim_log_debug(1000U, "Forward", "btrpkt->n6= %d.\n", __nesc_ntoh_uint16(btrpkt->n6.nxdata));
                      sim_log_debug(1001U, "Forward", "temppkt6= %d.\n", __nesc_ntoh_uint16(temppkt->n6.nxdata));
                    }
                  else {
#line 3949
                    if ((__nesc_ntoh_uint16(btrpkt->n5.nxdata) == 100 && __nesc_ntoh_uint16(btrpkt->n4.nxdata) != 100 && __nesc_ntoh_uint16(btrpkt->n3.nxdata) != 100 && __nesc_ntoh_uint16(btrpkt->n2.nxdata) != 100 && __nesc_ntoh_uint16(btrpkt->n1.nxdata) != 100) || (__nesc_ntoh_uint16(btrpkt->n5.nxdata) == 100 && NetworkC$flag4[sim_node()] != 0)) {
                        __nesc_hton_uint16(temppkt->n5.nxdata, NetworkC$wa[sim_node()] / 1000);
                        NetworkC$flag5[sim_node()] = 1;
                        sim_log_debug(1002U, "Forward", "temppkt5= %d.\n", __nesc_ntoh_uint16(temppkt->n5.nxdata));
                      }
                    else {
#line 3954
                      if ((__nesc_ntoh_uint16(btrpkt->n4.nxdata) == 100 && __nesc_ntoh_uint16(btrpkt->n3.nxdata) != 100 && __nesc_ntoh_uint16(btrpkt->n2.nxdata) != 100 && __nesc_ntoh_uint16(btrpkt->n1.nxdata) != 100) || (__nesc_ntoh_uint16(btrpkt->n4.nxdata) == 100 && NetworkC$flag3[sim_node()] != 0)) {
                          __nesc_hton_uint16(temppkt->n4.nxdata, NetworkC$wa[sim_node()] / 1000);
                          NetworkC$flag4[sim_node()] = 1;
                          sim_log_debug(1003U, "Forward", "temppkt4= %d.\n", __nesc_ntoh_uint16(temppkt->n4.nxdata));
                        }
                      else {
#line 3959
                        if ((__nesc_ntoh_uint16(btrpkt->n3.nxdata) == 100 && __nesc_ntoh_uint16(btrpkt->n2.nxdata) != 100 && __nesc_ntoh_uint16(btrpkt->n1.nxdata) != 100) || (__nesc_ntoh_uint16(btrpkt->n3.nxdata) == 100 && NetworkC$flag2[sim_node()] != 0)) {
                            __nesc_hton_uint16(temppkt->n3.nxdata, NetworkC$wa[sim_node()] / 1000);
                            NetworkC$flag3[sim_node()] = 1;
                            sim_log_debug(1004U, "Forward", "temppkt3= %d.\n", __nesc_ntoh_uint16(temppkt->n3.nxdata));
                          }
                        else {
#line 3964
                          if ((__nesc_ntoh_uint16(btrpkt->n2.nxdata) == 100 && __nesc_ntoh_uint16(btrpkt->n1.nxdata) != 100) || (__nesc_ntoh_uint16(btrpkt->n2.nxdata) == 100 && NetworkC$flag1[sim_node()] != 0)) {
                              __nesc_hton_uint16(temppkt->n2.nxdata, NetworkC$wa[sim_node()] / 1000);
                              NetworkC$flag2[sim_node()] = 1;
                              sim_log_debug(1005U, "Forward", "temppkt2= %d.\n", __nesc_ntoh_uint16(temppkt->n2.nxdata));
                            }
                          else {
                            if (__nesc_ntoh_uint16(btrpkt->n1.nxdata) == 100) {
                                __nesc_hton_uint16(temppkt->n1.nxdata, NetworkC$wa[sim_node()] / 1000);
                                NetworkC$flag1[sim_node()] = 1;
                                sim_log_debug(1006U, "Forward", "temppkt1= %d.\n", __nesc_ntoh_uint16(temppkt->n1.nxdata));
                              }
                            }
                          }
                        }
                      }
                    }
#line 3976
                  NetworkC$wa[sim_node()] = (NetworkC$wa[sim_node()] - NetworkC$wa[sim_node()] / 1000 * 1000) * 10;
                  NetworkC$wb[sim_node()] = (NetworkC$wb[sim_node()] - NetworkC$wb[sim_node()] / 1000 * 1000) * 10;
                  sim_log_debug(1007U, "Forward", "wa1= %d.\n", NetworkC$wa[sim_node()]);
                  sim_log_debug(1008U, "Forward", "wb1= %d.\n", NetworkC$wb[sim_node()]);

                  NetworkC$ws1[sim_node()] = NetworkC$weishu(NetworkC$wa[sim_node()]);
                  NetworkC$ws2[sim_node()] = NetworkC$weishu(NetworkC$wb[sim_node()]);
                  NetworkC$flag[sim_node()] = 1;
                }

              NetworkC$wa2[sim_node()] = (float )NetworkC$wa[sim_node()] / 10000;
              NetworkC$wb2[sim_node()] = (float )NetworkC$wb[sim_node()] / 10000;

              sim_log_debug(1009U, "Forward", "wa2= %f.\n", NetworkC$wa2[sim_node()]);
              sim_log_debug(1010U, "Forward", "wb2= %f.\n", NetworkC$wb2[sim_node()]);

              __nesc_hton_uint16(temppkt->a.nxdata, (int )(NetworkC$wa2[sim_node()] * NetworkC$z[sim_node()]));
              __nesc_hton_uint16(temppkt->b.nxdata, (int )(NetworkC$wb2[sim_node()] * NetworkC$z[sim_node()]));
              if (NetworkC$flag[sim_node()] == 0) {
                  __nesc_hton_uint16(temppkt->n1.nxdata, __nesc_ntoh_uint16(btrpkt->n1.nxdata));
                  __nesc_hton_uint16(temppkt->n2.nxdata, __nesc_ntoh_uint16(btrpkt->n2.nxdata));
                  __nesc_hton_uint16(temppkt->n3.nxdata, __nesc_ntoh_uint16(btrpkt->n3.nxdata));
                  __nesc_hton_uint16(temppkt->n4.nxdata, __nesc_ntoh_uint16(btrpkt->n4.nxdata));
                  __nesc_hton_uint16(temppkt->n5.nxdata, __nesc_ntoh_uint16(btrpkt->n5.nxdata));
                  __nesc_hton_uint16(temppkt->n6.nxdata, __nesc_ntoh_uint16(btrpkt->n6.nxdata));
                }
              else 
#line 4001
                {
                  NetworkC$pdflag(&NetworkC$flag[sim_node()], &NetworkC$flag1[sim_node()], &NetworkC$flag2[sim_node()], &NetworkC$flag3[sim_node()], &NetworkC$flag4[sim_node()], &NetworkC$flag5[sim_node()], &NetworkC$flag6[sim_node()], btrpkt, temppkt);
                }
              sim_log_debug(1011U, "Forward", "temppkt->n1= %d.\n", __nesc_ntoh_uint16(temppkt->n1.nxdata));
              sim_log_debug(1012U, "Forward", "temppkt->n2= %d.\n", __nesc_ntoh_uint16(temppkt->n2.nxdata));
              sim_log_debug(1013U, "Forward", "temppkt->n3= %d.\n", __nesc_ntoh_uint16(temppkt->n3.nxdata));
              sim_log_debug(1014U, "Forward", "temppkt->n4= %d.\n", __nesc_ntoh_uint16(temppkt->n4.nxdata));
              sim_log_debug(1015U, "Forward", "temppkt->n5= %d.\n", __nesc_ntoh_uint16(temppkt->n5.nxdata));
              sim_log_debug(1016U, "Forward", "temppkt->n6= %d.\n", __nesc_ntoh_uint16(temppkt->n6.nxdata));

              sim_log_debug(1017U, "Forward", "m32-19= %f.\n", NetworkC$m[sim_node()]);
              sim_log_debug(1018U, "Forward", "n32-19= %f.\n", NetworkC$n[sim_node()]);
              sim_log_debug(1019U, "Forward", "a32-19= %d.\n", __nesc_ntoh_uint16(temppkt->a.nxdata));
              sim_log_debug(1020U, "Forward", "b32-19= %d.\n", __nesc_ntoh_uint16(temppkt->b.nxdata));

              __nesc_hton_uint16(temppkt->nodeid.nxdata, TOS_NODE_ID);
              __nesc_hton_uint16(temppkt->sourceid.nxdata, __nesc_ntoh_uint16(btrpkt->sourceid.nxdata));
              __nesc_hton_uint16(temppkt->count.nxdata, __nesc_ntoh_uint16(btrpkt->count.nxdata));
              if (!NetworkC$busy[sim_node()]) {
                  if (NetworkC$AMSend$send(AM_BROADCAST_ADDR, &NetworkC$pkt[sim_node()], sizeof(NetworkMsg )) == SUCCESS) {
                      NetworkC$busy[sim_node()] = TRUE;
                    }
                }
            }
        }


      if (TOS_NODE_ID == 8 && __nesc_ntoh_uint16(btrpkt->nodeid.nxdata) == 21) {
          NetworkMsg *temppkt = (NetworkMsg *)NetworkC$Packet$getPayload(&NetworkC$pkt[sim_node()], sizeof(NetworkMsg ));

#line 4030
          sim_log_debug(1021U, "Forward", "r218= %d.\n", NetworkC$r218[sim_node()]);
          NetworkC$ssbm(btrpkt);
          NetworkC$wa[sim_node()] = NetworkC$m[sim_node()] * 10000;
          NetworkC$wb[sim_node()] = NetworkC$n[sim_node()] * 10000;

          NetworkC$ws1[sim_node()] = NetworkC$weishu(NetworkC$wa[sim_node()]);
          NetworkC$ws2[sim_node()] = NetworkC$weishu(NetworkC$wb[sim_node()]);
          sim_log_debug(1022U, "Forward", "ws1= %d.\n", NetworkC$ws1[sim_node()]);
          sim_log_debug(1023U, "Forward", "ws2= %d.\n", NetworkC$ws2[sim_node()]);
          while (NetworkC$ws1[sim_node()] == NetworkC$ws2[sim_node()] && NetworkC$wa[sim_node()] / 1000 == NetworkC$wb[sim_node()] / 1000) {

              if ((__nesc_ntoh_uint16(btrpkt->n6.nxdata) == 100 && __nesc_ntoh_uint16(btrpkt->n5.nxdata) != 100 && __nesc_ntoh_uint16(btrpkt->n4.nxdata) != 100 && __nesc_ntoh_uint16(btrpkt->n3.nxdata) != 100 && __nesc_ntoh_uint16(btrpkt->n2.nxdata) != 100 && __nesc_ntoh_uint16(btrpkt->n1.nxdata) != 100) || (__nesc_ntoh_uint16(btrpkt->n6.nxdata) == 100 && NetworkC$flag5[sim_node()] != 0)) {
                  __nesc_hton_uint16(temppkt->n6.nxdata, NetworkC$wa[sim_node()] / 1000);
                  NetworkC$flag6[sim_node()] = 1;
                  sim_log_debug(1024U, "Forward", "btrpkt->n1= %d.\n", __nesc_ntoh_uint16(btrpkt->n1.nxdata));
                  sim_log_debug(1025U, "Forward", "btrpkt->n2= %d.\n", __nesc_ntoh_uint16(btrpkt->n2.nxdata));
                  sim_log_debug(1026U, "Forward", "btrpkt->n3= %d.\n", __nesc_ntoh_uint16(btrpkt->n3.nxdata));
                  sim_log_debug(1027U, "Forward", "btrpkt->n4= %d.\n", __nesc_ntoh_uint16(btrpkt->n4.nxdata));
                  sim_log_debug(1028U, "Forward", "btrpkt->n5= %d.\n", __nesc_ntoh_uint16(btrpkt->n5.nxdata));
                  sim_log_debug(1029U, "Forward", "btrpkt->n6= %d.\n", __nesc_ntoh_uint16(btrpkt->n6.nxdata));
                  sim_log_debug(1030U, "Forward", "temppkt6= %d.\n", __nesc_ntoh_uint16(temppkt->n6.nxdata));
                }
              else {
#line 4052
                if ((__nesc_ntoh_uint16(btrpkt->n5.nxdata) == 100 && __nesc_ntoh_uint16(btrpkt->n4.nxdata) != 100 && __nesc_ntoh_uint16(btrpkt->n3.nxdata) != 100 && __nesc_ntoh_uint16(btrpkt->n2.nxdata) != 100 && __nesc_ntoh_uint16(btrpkt->n1.nxdata) != 100) || (__nesc_ntoh_uint16(btrpkt->n5.nxdata) == 100 && NetworkC$flag4[sim_node()] != 0)) {
                    __nesc_hton_uint16(temppkt->n5.nxdata, NetworkC$wa[sim_node()] / 1000);
                    NetworkC$flag5[sim_node()] = 1;
                    sim_log_debug(1031U, "Forward", "temppkt5= %d.\n", __nesc_ntoh_uint16(temppkt->n5.nxdata));
                  }
                else {
#line 4057
                  if ((__nesc_ntoh_uint16(btrpkt->n4.nxdata) == 100 && __nesc_ntoh_uint16(btrpkt->n3.nxdata) != 100 && __nesc_ntoh_uint16(btrpkt->n2.nxdata) != 100 && __nesc_ntoh_uint16(btrpkt->n1.nxdata) != 100) || (__nesc_ntoh_uint16(btrpkt->n4.nxdata) == 100 && NetworkC$flag3[sim_node()] != 0)) {
                      __nesc_hton_uint16(temppkt->n4.nxdata, NetworkC$wa[sim_node()] / 1000);
                      NetworkC$flag4[sim_node()] = 1;
                      sim_log_debug(1032U, "Forward", "temppkt4= %d.\n", __nesc_ntoh_uint16(temppkt->n4.nxdata));
                    }
                  else {
#line 4062
                    if ((__nesc_ntoh_uint16(btrpkt->n3.nxdata) == 100 && __nesc_ntoh_uint16(btrpkt->n2.nxdata) != 100 && __nesc_ntoh_uint16(btrpkt->n1.nxdata) != 100) || (__nesc_ntoh_uint16(btrpkt->n3.nxdata) == 100 && NetworkC$flag2[sim_node()] != 0)) {
                        __nesc_hton_uint16(temppkt->n3.nxdata, NetworkC$wa[sim_node()] / 1000);
                        NetworkC$flag3[sim_node()] = 1;
                        sim_log_debug(1033U, "Forward", "temppkt3= %d.\n", __nesc_ntoh_uint16(temppkt->n3.nxdata));
                      }
                    else {
#line 4067
                      if ((__nesc_ntoh_uint16(btrpkt->n2.nxdata) == 100 && __nesc_ntoh_uint16(btrpkt->n1.nxdata) != 100) || (__nesc_ntoh_uint16(btrpkt->n2.nxdata) == 100 && NetworkC$flag1[sim_node()] != 0)) {
                          __nesc_hton_uint16(temppkt->n2.nxdata, NetworkC$wa[sim_node()] / 1000);
                          NetworkC$flag2[sim_node()] = 1;
                          sim_log_debug(1034U, "Forward", "temppkt2= %d.\n", __nesc_ntoh_uint16(temppkt->n2.nxdata));
                        }
                      else {
                        if (__nesc_ntoh_uint16(btrpkt->n1.nxdata) == 100) {
                            __nesc_hton_uint16(temppkt->n1.nxdata, NetworkC$wa[sim_node()] / 1000);
                            NetworkC$flag1[sim_node()] = 1;
                            sim_log_debug(1035U, "Forward", "temppkt1= %d.\n", __nesc_ntoh_uint16(temppkt->n1.nxdata));
                          }
                        }
                      }
                    }
                  }
                }
#line 4079
              NetworkC$wa[sim_node()] = (NetworkC$wa[sim_node()] - NetworkC$wa[sim_node()] / 1000 * 1000) * 10;
              NetworkC$wb[sim_node()] = (NetworkC$wb[sim_node()] - NetworkC$wb[sim_node()] / 1000 * 1000) * 10;
              sim_log_debug(1036U, "Forward", "wa1= %d.\n", NetworkC$wa[sim_node()]);
              sim_log_debug(1037U, "Forward", "wb1= %d.\n", NetworkC$wb[sim_node()]);

              NetworkC$ws1[sim_node()] = NetworkC$weishu(NetworkC$wa[sim_node()]);
              NetworkC$ws2[sim_node()] = NetworkC$weishu(NetworkC$wb[sim_node()]);
              NetworkC$flag[sim_node()] = 1;
            }

          NetworkC$wa2[sim_node()] = (float )NetworkC$wa[sim_node()] / 10000;
          NetworkC$wb2[sim_node()] = (float )NetworkC$wb[sim_node()] / 10000;

          sim_log_debug(1038U, "Forward", "wa2= %f.\n", NetworkC$wa2[sim_node()]);
          sim_log_debug(1039U, "Forward", "wb2= %f.\n", NetworkC$wb2[sim_node()]);

          __nesc_hton_uint16(temppkt->a.nxdata, (int )(NetworkC$wa2[sim_node()] * NetworkC$z[sim_node()]));
          __nesc_hton_uint16(temppkt->b.nxdata, (int )(NetworkC$wb2[sim_node()] * NetworkC$z[sim_node()]));
          if (NetworkC$flag[sim_node()] == 0) {
              __nesc_hton_uint16(temppkt->n1.nxdata, __nesc_ntoh_uint16(btrpkt->n1.nxdata));
              __nesc_hton_uint16(temppkt->n2.nxdata, __nesc_ntoh_uint16(btrpkt->n2.nxdata));
              __nesc_hton_uint16(temppkt->n3.nxdata, __nesc_ntoh_uint16(btrpkt->n3.nxdata));
              __nesc_hton_uint16(temppkt->n4.nxdata, __nesc_ntoh_uint16(btrpkt->n4.nxdata));
              __nesc_hton_uint16(temppkt->n5.nxdata, __nesc_ntoh_uint16(btrpkt->n5.nxdata));
              __nesc_hton_uint16(temppkt->n6.nxdata, __nesc_ntoh_uint16(btrpkt->n6.nxdata));
            }
          else 
#line 4104
            {
              NetworkC$pdflag(&NetworkC$flag[sim_node()], &NetworkC$flag1[sim_node()], &NetworkC$flag2[sim_node()], &NetworkC$flag3[sim_node()], &NetworkC$flag4[sim_node()], &NetworkC$flag5[sim_node()], &NetworkC$flag6[sim_node()], btrpkt, temppkt);
            }
          sim_log_debug(1040U, "Forward", "temppkt->n1= %d.\n", __nesc_ntoh_uint16(temppkt->n1.nxdata));
          sim_log_debug(1041U, "Forward", "temppkt->n2= %d.\n", __nesc_ntoh_uint16(temppkt->n2.nxdata));
          sim_log_debug(1042U, "Forward", "temppkt->n3= %d.\n", __nesc_ntoh_uint16(temppkt->n3.nxdata));
          sim_log_debug(1043U, "Forward", "temppkt->n4= %d.\n", __nesc_ntoh_uint16(temppkt->n4.nxdata));
          sim_log_debug(1044U, "Forward", "temppkt->n5= %d.\n", __nesc_ntoh_uint16(temppkt->n5.nxdata));
          sim_log_debug(1045U, "Forward", "temppkt->n6= %d.\n", __nesc_ntoh_uint16(temppkt->n6.nxdata));

          sim_log_debug(1046U, "Forward", "m21-8= %f.\n", NetworkC$m[sim_node()]);
          sim_log_debug(1047U, "Forward", "n21-8= %f.\n", NetworkC$n[sim_node()]);
          sim_log_debug(1048U, "Forward", "a21-8= %d.\n", __nesc_ntoh_uint16(temppkt->a.nxdata));
          sim_log_debug(1049U, "Forward", "b21-8= %d.\n", __nesc_ntoh_uint16(temppkt->b.nxdata));

          __nesc_hton_uint16(temppkt->nodeid.nxdata, TOS_NODE_ID);
          __nesc_hton_uint16(temppkt->sourceid.nxdata, __nesc_ntoh_uint16(btrpkt->sourceid.nxdata));
          __nesc_hton_uint16(temppkt->count.nxdata, __nesc_ntoh_uint16(btrpkt->count.nxdata));
          if (!NetworkC$busy[sim_node()]) {
              if (NetworkC$AMSend$send(AM_BROADCAST_ADDR, &NetworkC$pkt[sim_node()], sizeof(NetworkMsg )) == SUCCESS) {
                  NetworkC$busy[sim_node()] = TRUE;
                }
            }
        }

      if (TOS_NODE_ID == 21 && __nesc_ntoh_uint16(btrpkt->nodeid.nxdata) == 9) {
          NetworkMsg *temppkt = (NetworkMsg *)NetworkC$Packet$getPayload(&NetworkC$pkt[sim_node()], sizeof(NetworkMsg ));

#line 4131
          sim_log_debug(1050U, "Forward", "r921= %d.\n", NetworkC$r921[sim_node()]);
          NetworkC$ssbm(btrpkt);
          NetworkC$wa[sim_node()] = NetworkC$m[sim_node()] * 10000;
          NetworkC$wb[sim_node()] = NetworkC$n[sim_node()] * 10000;

          NetworkC$ws1[sim_node()] = NetworkC$weishu(NetworkC$wa[sim_node()]);
          NetworkC$ws2[sim_node()] = NetworkC$weishu(NetworkC$wb[sim_node()]);
          sim_log_debug(1051U, "Forward", "ws1= %d.\n", NetworkC$ws1[sim_node()]);
          sim_log_debug(1052U, "Forward", "ws2= %d.\n", NetworkC$ws2[sim_node()]);
          while (NetworkC$ws1[sim_node()] == NetworkC$ws2[sim_node()] && NetworkC$wa[sim_node()] / 1000 == NetworkC$wb[sim_node()] / 1000) {
              printf("@@@@@@@@@@@@@@@@@@@");

              if ((__nesc_ntoh_uint16(btrpkt->n6.nxdata) == 100 && __nesc_ntoh_uint16(btrpkt->n5.nxdata) != 100 && __nesc_ntoh_uint16(btrpkt->n4.nxdata) != 100 && __nesc_ntoh_uint16(btrpkt->n3.nxdata) != 100 && __nesc_ntoh_uint16(btrpkt->n2.nxdata) != 100 && __nesc_ntoh_uint16(btrpkt->n1.nxdata) != 100) || (__nesc_ntoh_uint16(btrpkt->n6.nxdata) == 100 && NetworkC$flag5[sim_node()] != 0)) {
                  __nesc_hton_uint16(temppkt->n6.nxdata, NetworkC$wa[sim_node()] / 1000);
                  NetworkC$flag6[sim_node()] = 1;
                  sim_log_debug(1053U, "Forward", "btrpkt->n1= %d.\n", __nesc_ntoh_uint16(btrpkt->n1.nxdata));
                  sim_log_debug(1054U, "Forward", "btrpkt->n2= %d.\n", __nesc_ntoh_uint16(btrpkt->n2.nxdata));
                  sim_log_debug(1055U, "Forward", "btrpkt->n3= %d.\n", __nesc_ntoh_uint16(btrpkt->n3.nxdata));
                  sim_log_debug(1056U, "Forward", "btrpkt->n4= %d.\n", __nesc_ntoh_uint16(btrpkt->n4.nxdata));
                  sim_log_debug(1057U, "Forward", "btrpkt->n5= %d.\n", __nesc_ntoh_uint16(btrpkt->n5.nxdata));
                  sim_log_debug(1058U, "Forward", "btrpkt->n6= %d.\n", __nesc_ntoh_uint16(btrpkt->n6.nxdata));
                  sim_log_debug(1059U, "Forward", "temppkt6= %d.\n", __nesc_ntoh_uint16(temppkt->n6.nxdata));
                }
              else {
#line 4154
                if ((__nesc_ntoh_uint16(btrpkt->n5.nxdata) == 100 && __nesc_ntoh_uint16(btrpkt->n4.nxdata) != 100 && __nesc_ntoh_uint16(btrpkt->n3.nxdata) != 100 && __nesc_ntoh_uint16(btrpkt->n2.nxdata) != 100 && __nesc_ntoh_uint16(btrpkt->n1.nxdata) != 100) || (__nesc_ntoh_uint16(btrpkt->n5.nxdata) == 100 && NetworkC$flag4[sim_node()] != 0)) {
                    __nesc_hton_uint16(temppkt->n5.nxdata, NetworkC$wa[sim_node()] / 1000);
                    NetworkC$flag5[sim_node()] = 1;
                    sim_log_debug(1060U, "Forward", "temppkt5= %d.\n", __nesc_ntoh_uint16(temppkt->n5.nxdata));
                  }
                else {
#line 4159
                  if ((__nesc_ntoh_uint16(btrpkt->n4.nxdata) == 100 && __nesc_ntoh_uint16(btrpkt->n3.nxdata) != 100 && __nesc_ntoh_uint16(btrpkt->n2.nxdata) != 100 && __nesc_ntoh_uint16(btrpkt->n1.nxdata) != 100) || (__nesc_ntoh_uint16(btrpkt->n4.nxdata) == 100 && NetworkC$flag3[sim_node()] != 0)) {
                      __nesc_hton_uint16(temppkt->n4.nxdata, NetworkC$wa[sim_node()] / 1000);
                      NetworkC$flag4[sim_node()] = 1;
                      sim_log_debug(1061U, "Forward", "temppkt4= %d.\n", __nesc_ntoh_uint16(temppkt->n4.nxdata));
                    }
                  else {
#line 4164
                    if ((__nesc_ntoh_uint16(btrpkt->n3.nxdata) == 100 && __nesc_ntoh_uint16(btrpkt->n2.nxdata) != 100 && __nesc_ntoh_uint16(btrpkt->n1.nxdata) != 100) || (__nesc_ntoh_uint16(btrpkt->n3.nxdata) == 100 && NetworkC$flag2[sim_node()] != 0)) {
                        __nesc_hton_uint16(temppkt->n3.nxdata, NetworkC$wa[sim_node()] / 1000);
                        NetworkC$flag3[sim_node()] = 1;
                        sim_log_debug(1062U, "Forward", "temppkt3= %d.\n", __nesc_ntoh_uint16(temppkt->n3.nxdata));
                      }
                    else {
#line 4169
                      if ((__nesc_ntoh_uint16(btrpkt->n2.nxdata) == 100 && __nesc_ntoh_uint16(btrpkt->n1.nxdata) != 100) || (__nesc_ntoh_uint16(btrpkt->n2.nxdata) == 100 && NetworkC$flag1[sim_node()] != 0)) {
                          __nesc_hton_uint16(temppkt->n2.nxdata, NetworkC$wa[sim_node()] / 1000);
                          NetworkC$flag2[sim_node()] = 1;
                          sim_log_debug(1063U, "Forward", "flag1= %d.\n", NetworkC$flag1[sim_node()]);
                          sim_log_debug(1064U, "Forward", "btrpkt->n1= %d.\n", __nesc_ntoh_uint16(btrpkt->n1.nxdata));
                          sim_log_debug(1065U, "Forward", "temppkt2= %d.\n", __nesc_ntoh_uint16(temppkt->n2.nxdata));
                        }
                      else {
                        if (__nesc_ntoh_uint16(btrpkt->n1.nxdata) == 100) {
                            __nesc_hton_uint16(temppkt->n1.nxdata, NetworkC$wa[sim_node()] / 1000);
                            NetworkC$flag1[sim_node()] = 1;
                            sim_log_debug(1066U, "Forward", "temppkt1= %d.\n", __nesc_ntoh_uint16(temppkt->n1.nxdata));
                          }
                        }
                      }
                    }
                  }
                }
#line 4183
              NetworkC$wa[sim_node()] = (NetworkC$wa[sim_node()] - NetworkC$wa[sim_node()] / 1000 * 1000) * 10;
              NetworkC$wb[sim_node()] = (NetworkC$wb[sim_node()] - NetworkC$wb[sim_node()] / 1000 * 1000) * 10;
              sim_log_debug(1067U, "Forward", "wa1= %d.\n", NetworkC$wa[sim_node()]);
              sim_log_debug(1068U, "Forward", "wb1= %d.\n", NetworkC$wb[sim_node()]);

              NetworkC$ws1[sim_node()] = NetworkC$weishu(NetworkC$wa[sim_node()]);
              NetworkC$ws2[sim_node()] = NetworkC$weishu(NetworkC$wb[sim_node()]);
              NetworkC$flag[sim_node()] = 1;
            }

          NetworkC$wa2[sim_node()] = (float )NetworkC$wa[sim_node()] / 10000;
          NetworkC$wb2[sim_node()] = (float )NetworkC$wb[sim_node()] / 10000;

          sim_log_debug(1069U, "Forward", "wa2= %f.\n", NetworkC$wa2[sim_node()]);
          sim_log_debug(1070U, "Forward", "wb2= %f.\n", NetworkC$wb2[sim_node()]);

          __nesc_hton_uint16(temppkt->a.nxdata, (int )(NetworkC$wa2[sim_node()] * NetworkC$z[sim_node()]));
          __nesc_hton_uint16(temppkt->b.nxdata, (int )(NetworkC$wb2[sim_node()] * NetworkC$z[sim_node()]));
          if (NetworkC$flag[sim_node()] == 0) {
              __nesc_hton_uint16(temppkt->n1.nxdata, __nesc_ntoh_uint16(btrpkt->n1.nxdata));
              __nesc_hton_uint16(temppkt->n2.nxdata, __nesc_ntoh_uint16(btrpkt->n2.nxdata));
              __nesc_hton_uint16(temppkt->n3.nxdata, __nesc_ntoh_uint16(btrpkt->n3.nxdata));
              __nesc_hton_uint16(temppkt->n4.nxdata, __nesc_ntoh_uint16(btrpkt->n4.nxdata));
              __nesc_hton_uint16(temppkt->n5.nxdata, __nesc_ntoh_uint16(btrpkt->n5.nxdata));
              __nesc_hton_uint16(temppkt->n6.nxdata, __nesc_ntoh_uint16(btrpkt->n6.nxdata));
            }
          else 
#line 4208
            {
              NetworkC$pdflag(&NetworkC$flag[sim_node()], &NetworkC$flag1[sim_node()], &NetworkC$flag2[sim_node()], &NetworkC$flag3[sim_node()], &NetworkC$flag4[sim_node()], &NetworkC$flag5[sim_node()], &NetworkC$flag6[sim_node()], btrpkt, temppkt);
            }
          sim_log_debug(1071U, "Forward", "temppkt->n1= %d.\n", __nesc_ntoh_uint16(temppkt->n1.nxdata));
          sim_log_debug(1072U, "Forward", "temppkt->n2= %d.\n", __nesc_ntoh_uint16(temppkt->n2.nxdata));
          sim_log_debug(1073U, "Forward", "temppkt->n3= %d.\n", __nesc_ntoh_uint16(temppkt->n3.nxdata));
          sim_log_debug(1074U, "Forward", "temppkt->n4= %d.\n", __nesc_ntoh_uint16(temppkt->n4.nxdata));
          sim_log_debug(1075U, "Forward", "temppkt->n5= %d.\n", __nesc_ntoh_uint16(temppkt->n5.nxdata));
          sim_log_debug(1076U, "Forward", "temppkt->n6= %d.\n", __nesc_ntoh_uint16(temppkt->n6.nxdata));

          sim_log_debug(1077U, "Forward", "m9-21= %f.\n", NetworkC$m[sim_node()]);
          sim_log_debug(1078U, "Forward", "n9-21= %f.\n", NetworkC$n[sim_node()]);
          sim_log_debug(1079U, "Forward", "a9-21= %d.\n", __nesc_ntoh_uint16(temppkt->a.nxdata));
          sim_log_debug(1080U, "Forward", "b9-21= %d.\n", __nesc_ntoh_uint16(temppkt->b.nxdata));

          __nesc_hton_uint16(temppkt->nodeid.nxdata, TOS_NODE_ID);
          __nesc_hton_uint16(temppkt->sourceid.nxdata, __nesc_ntoh_uint16(btrpkt->sourceid.nxdata));
          __nesc_hton_uint16(temppkt->count.nxdata, __nesc_ntoh_uint16(btrpkt->count.nxdata));
          if (!NetworkC$busy[sim_node()]) {
              if (NetworkC$AMSend$send(AM_BROADCAST_ADDR, &NetworkC$pkt[sim_node()], sizeof(NetworkMsg )) == SUCCESS) {
                  NetworkC$busy[sim_node()] = TRUE;
                }
            }
        }

      if (TOS_NODE_ID == 22) {
          sim_log_debug(1081U, "Forward", "r233322= %d.\n", NetworkC$r233322[sim_node()]);
          sim_log_debug(1082U, "Forward", "r2322= %d.\n", NetworkC$r2322[sim_node()]);
          sim_log_debug(1083U, "Forward", "r3322= %d.\n", NetworkC$r3322[sim_node()]);
          sim_log_debug(1084U, "Forward", "s22[0]= %f.\n", NetworkC$s22[sim_node()][0]);
          sim_log_debug(1085U, "Forward", "s22[1]= %f.\n", NetworkC$s22[sim_node()][1]);
          sim_log_debug(1086U, "Forward", "s22[2]= %f.\n", NetworkC$s22[sim_node()][2]);
          sim_log_debug(1087U, "Forward", "s22[3]= %f.\n", NetworkC$s22[sim_node()][3]);

          if (__nesc_ntoh_uint16(btrpkt->nodeid.nxdata) == 23) {
              NetworkMsg *temppkt = (NetworkMsg *)NetworkC$Packet$getPayload(&NetworkC$pkt[sim_node()], sizeof(NetworkMsg ));

              NetworkC$ssbm(btrpkt);
              NetworkC$wa[sim_node()] = NetworkC$m[sim_node()] * 10000;
              NetworkC$wb[sim_node()] = NetworkC$n[sim_node()] * 10000;

              NetworkC$ws1[sim_node()] = NetworkC$weishu(NetworkC$wa[sim_node()]);
              NetworkC$ws2[sim_node()] = NetworkC$weishu(NetworkC$wb[sim_node()]);
              sim_log_debug(1088U, "Forward", "ws1= %d.\n", NetworkC$ws1[sim_node()]);
              sim_log_debug(1089U, "Forward", "ws2= %d.\n", NetworkC$ws2[sim_node()]);
              while (NetworkC$ws1[sim_node()] == NetworkC$ws2[sim_node()] && NetworkC$wa[sim_node()] / 1000 == NetworkC$wb[sim_node()] / 1000) {

                  if ((__nesc_ntoh_uint16(btrpkt->n6.nxdata) == 100 && __nesc_ntoh_uint16(btrpkt->n5.nxdata) != 100 && __nesc_ntoh_uint16(btrpkt->n4.nxdata) != 100 && __nesc_ntoh_uint16(btrpkt->n3.nxdata) != 100 && __nesc_ntoh_uint16(btrpkt->n2.nxdata) != 100 && __nesc_ntoh_uint16(btrpkt->n1.nxdata) != 100) || (__nesc_ntoh_uint16(btrpkt->n6.nxdata) == 100 && NetworkC$flag5[sim_node()] != 0)) {
                      __nesc_hton_uint16(temppkt->n6.nxdata, NetworkC$wa[sim_node()] / 1000);
                      NetworkC$flag6[sim_node()] = 1;
                      sim_log_debug(1090U, "Forward", "btrpkt->n1= %d.\n", __nesc_ntoh_uint16(btrpkt->n1.nxdata));
                      sim_log_debug(1091U, "Forward", "btrpkt->n2= %d.\n", __nesc_ntoh_uint16(btrpkt->n2.nxdata));
                      sim_log_debug(1092U, "Forward", "btrpkt->n3= %d.\n", __nesc_ntoh_uint16(btrpkt->n3.nxdata));
                      sim_log_debug(1093U, "Forward", "btrpkt->n4= %d.\n", __nesc_ntoh_uint16(btrpkt->n4.nxdata));
                      sim_log_debug(1094U, "Forward", "btrpkt->n5= %d.\n", __nesc_ntoh_uint16(btrpkt->n5.nxdata));
                      sim_log_debug(1095U, "Forward", "btrpkt->n6= %d.\n", __nesc_ntoh_uint16(btrpkt->n6.nxdata));
                      sim_log_debug(1096U, "Forward", "temppkt6= %d.\n", __nesc_ntoh_uint16(temppkt->n6.nxdata));
                    }
                  else {
#line 4266
                    if ((__nesc_ntoh_uint16(btrpkt->n5.nxdata) == 100 && __nesc_ntoh_uint16(btrpkt->n4.nxdata) != 100 && __nesc_ntoh_uint16(btrpkt->n3.nxdata) != 100 && __nesc_ntoh_uint16(btrpkt->n2.nxdata) != 100 && __nesc_ntoh_uint16(btrpkt->n1.nxdata) != 100) || (__nesc_ntoh_uint16(btrpkt->n5.nxdata) == 100 && NetworkC$flag4[sim_node()] != 0)) {
                        __nesc_hton_uint16(temppkt->n5.nxdata, NetworkC$wa[sim_node()] / 1000);
                        NetworkC$flag5[sim_node()] = 1;
                        sim_log_debug(1097U, "Forward", "temppkt5= %d.\n", __nesc_ntoh_uint16(temppkt->n5.nxdata));
                      }
                    else {
#line 4271
                      if ((__nesc_ntoh_uint16(btrpkt->n4.nxdata) == 100 && __nesc_ntoh_uint16(btrpkt->n3.nxdata) != 100 && __nesc_ntoh_uint16(btrpkt->n2.nxdata) != 100 && __nesc_ntoh_uint16(btrpkt->n1.nxdata) != 100) || (__nesc_ntoh_uint16(btrpkt->n4.nxdata) == 100 && NetworkC$flag3[sim_node()] != 0)) {
[truncated: 588,388 more chars]
