# Supplementary material for: Cluster‐Based Arithmetic Coding for Data Provenance Compression in Wireless Sensor Networks
Source: Hindawi journal article supplement (doi:10.1155/2018/9576978), 2018-01-01
Supplement: f1 [file 9576978.f1.zip › 9576978.f1/simulation code/arithmetic/topo.txt]

gain 9 5 -70.0
gain 9 6 -70.0
gain 9 21 -70.0
gain 8 5 -70.0
gain 8 4 -70.0
gain 7 4 -70.0
gain 7 3 -70.0
gain 5 4 -70.0
gain 6 2 -70.0
gain 4 1 -70.0
gain 3 1 -70.0
gain 1 50 -70.0
gain 2 50 -70.0

gain 10 7 -70.0
gain 11 10 -70.0
gain 12 11 -70.0
gain 13 12 -70.0
gain 14 13 -70.0
gain 15 14 -70.0
gain 16 15 -70.0
gain 17 16 -70.0
gain 18 17 -70.0
gain 19 18 -70.0
gain 20 19 -70.0

gain 21 8 -70.0
gain 22 7 -70.0
gain 23 10 -70.0
gain 23 22 -70.0
gain 24 23 -70.0
gain 25 12 -70.0
gain 25 24 -70.0
gain 26 25 -70.0
gain 27 14 -70.0
gain 27 26 -70.0
gain 28 27 -70.0
gain 29 16 -70.0
gain 29 28 -70.0
gain 30 29 -70.0
gain 31 30 -70.0
gain 32 19 -70.0
gain 32 31 -70.0

gain 33 22 -70.0
gain 33 43 -70.0
gain 34 33 -70.0
gain 35 24 -70.0
gain 35 34 -70.0
gain 36 35 -70.0
gain 37 26 -70.0
gain 37 36 -70.0
gain 38 37 -70.0
gain 39 28 -70.0
gain 39 38 -70.0
gain 40 39 -70.0
gain 41 30 -70.0
gain 41 40 -70.0
gain 42 41 -70.0

gain 43 9 -70.0

gain 44 43 -70.0
gain 45 44 -70.0
gain 46 34 -70.0
gain 46 45 -70.0
gain 47 46 -70.0
gain 48 36 -70.0
gain 48 47 -70.0
gain 49 39 -70.0
gain 49 48 -70.0
