# Supplementary material for: Cluster‐Based Arithmetic Coding for Data Provenance Compression in Wireless Sensor Networks
Source: Hindawi journal article supplement (doi:10.1155/2018/9576978), 2018-01-01
Supplement: f1 [file 9576978.f1.zip › 9576978.f1/simulation code/clustera/simbuild/micaz/ident_flags.txt]

-DIDENT_APPNAME=\"NetworkAppC\" -DIDENT_USERNAME=\"yyl\" -DIDENT_HOSTNAME=\"yyl-OptiPlex-38\" -DIDENT_USERHASH=0x21d4c32cL -DIDENT_TIMESTAMP=0x57626978L -DIDENT_UIDHASH=0xeae397dfL
