# Supplementary material for: Cluster‐Based Arithmetic Coding for Data Provenance Compression in Wireless Sensor Networks
Source: Hindawi journal article supplement (doi:10.1155/2018/9576978), 2018-01-01
Supplement: f1 [file 9576978.f1.zip › 9576978.f1/simulation code/clustera/test.py]

from TOSSIM import *
import sys

t=Tossim([])
r=t.radio()
f=open("topo.txt","r")

lines=f.readlines()
for line in lines:
 s=line.split()
 if(len(s)>0):
  if s[0] == "gain":
   print" ",s[1]," ",s[2]," ",s[3];
   r.add(int(s[1]), int(s[2]), float(s[3]))

noise=open("meyer-short.txt","r")
lines=noise.readlines()
for line in lines:
 str=line.strip()
 if (str!= ""):	          
   val = int(str)
   for i in range(0,101):
    t.getNode(i).addNoiseTraceReading(val)
for i in range(0,101):
 print"Creating noise model for",i;
 t.getNode(i).createNoiseModel()
 
t.getNode(0).bootAtTime(100);
t.getNode(1).bootAtTime(1001);
t.getNode(2).bootAtTime(2001);
t.getNode(3).bootAtTime(3001);
t.getNode(4).bootAtTime(4001);
t.getNode(5).bootAtTime(5001);
t.getNode(6).bootAtTime(6001);
t.getNode(7).bootAtTime(7001);
t.getNode(8).bootAtTime(8001);
t.getNode(9).bootAtTime(9001);
t.getNode(10).bootAtTime(10001);
t.getNode(11).bootAtTime(11001);
t.getNode(12).bootAtTime(12001);
t.getNode(13).bootAtTime(13001);
t.getNode(14).bootAtTime(14001);
t.getNode(15).bootAtTime(15001);
t.getNode(16).bootAtTime(16001);
t.getNode(17).bootAtTime(17001);
t.getNode(18).bootAtTime(18001);
t.getNode(19).bootAtTime(19001);
t.getNode(20).bootAtTime(20001);
t.getNode(21).bootAtTime(21001);
t.getNode(22).bootAtTime(22001);
t.getNode(23).bootAtTime(23001);
t.getNode(24).bootAtTime(24001);
t.getNode(25).bootAtTime(25001);
t.getNode(26).bootAtTime(26001);
t.getNode(27).bootAtTime(27001);
t.getNode(28).bootAtTime(28001);
t.getNode(29).bootAtTime(29001);
t.getNode(30).bootAtTime(30001);
t.getNode(31).bootAtTime(31001);
t.getNode(32).bootAtTime(32001);
t.getNode(33).bootAtTime(33001);
t.getNode(34).bootAtTime(34001);
t.getNode(35).bootAtTime(35001);
t.getNode(36).bootAtTime(36001);
t.getNode(37).bootAtTime(37001);
t.getNode(38).bootAtTime(38001);
t.getNode(39).bootAtTime(39001);
t.getNode(40).bootAtTime(40001);
t.getNode(41).bootAtTime(41001);
t.getNode(42).bootAtTime(42001);
t.getNode(43).bootAtTime(43001);
t.getNode(44).bootAtTime(44001);
t.getNode(45).bootAtTime(45001);
t.getNode(46).bootAtTime(46001);
t.getNode(47).bootAtTime(47001);
t.getNode(48).bootAtTime(48001);
t.getNode(49).bootAtTime(49001);
t.getNode(50).bootAtTime(50001);
t.getNode(51).bootAtTime(51001);
t.getNode(52).bootAtTime(52001);
t.getNode(53).bootAtTime(53001);
t.getNode(54).bootAtTime(54001);
t.getNode(55).bootAtTime(55001);
t.getNode(56).bootAtTime(56001);
t.getNode(57).bootAtTime(57001);
t.getNode(58).bootAtTime(58001);
t.getNode(59).bootAtTime(59001);
t.getNode(60).bootAtTime(60001);
t.getNode(61).bootAtTime(61001);
t.getNode(62).bootAtTime(62001);
t.getNode(63).bootAtTime(63001);
t.getNode(64).bootAtTime(64001);
t.getNode(65).bootAtTime(65001);
t.getNode(66).bootAtTime(66001);
t.getNode(67).bootAtTime(67001);
t.getNode(68).bootAtTime(68001);
t.getNode(69).bootAtTime(69001);
t.getNode(70).bootAtTime(70001);
t.getNode(71).bootAtTime(71001);
t.getNode(72).bootAtTime(72001);
t.getNode(73).bootAtTime(73001);
t.getNode(74).bootAtTime(74001);
t.getNode(75).bootAtTime(75001);
t.getNode(76).bootAtTime(76001);
t.getNode(77).bootAtTime(77001);
t.getNode(78).bootAtTime(78001);
t.getNode(79).bootAtTime(79001);
t.getNode(80).bootAtTime(80001);
t.getNode(81).bootAtTime(81001);
t.getNode(82).bootAtTime(82001);
t.getNode(83).bootAtTime(83001);
t.getNode(84).bootAtTime(84001);
t.getNode(85).bootAtTime(85001);
t.getNode(86).bootAtTime(86001);
t.getNode(87).bootAtTime(87001);
t.getNode(88).bootAtTime(88001);
t.getNode(89).bootAtTime(89001);
t.getNode(90).bootAtTime(90001);
t.getNode(91).bootAtTime(91001);
t.getNode(92).bootAtTime(92001);
t.getNode(93).bootAtTime(93001);
t.getNode(94).bootAtTime(94001);
t.getNode(95).bootAtTime(95001);
t.getNode(96).bootAtTime(96001);
t.getNode(97).bootAtTime(97001);
t.getNode(98).bootAtTime(98001);
t.getNode(99).bootAtTime(99001);
t.getNode(100).bootAtTime(100001);

f=open("log.txt","w")
t.addChannel("Boot",f)
t.addChannel("Forward",f)
t.addChannel("Forward",sys.stdout)
t.addChannel("Boot",sys.stdout)

for i in range(0,1000000):
 t.runNextEvent()

#t.runNextEvent();
#time=t.time()
#while(time+100000000000>t.time()):
# t.runNextEvent()
