# Supplementary material for: Cluster‐Based Arithmetic Coding for Data Provenance Compression in Wireless Sensor Networks
Source: Hindawi journal article supplement (doi:10.1155/2018/9576978), 2018-01-01
Supplement: f1 [file 9576978.f1.zip › 9576978.f1/simulation code/clustera/topo.txt]

gain 2 1 -70.0
gain 3 1 -70.0
gain 4 2 -70.0
gain 5 2 -70.0
gain 5 3 -70.0
gain 6 3 -70.0
gain 7 4 -70.0
gain 8 5 -70.0
gain 9 5 -70.0
gain 9 6 -70.0
gain 10 6 -70.0
gain 12 11 -70.0
gain 13 11 -70.0
gain 14 11 -70.0
gain 15 12 -70.0
gain 16 13 -70.0
gain 17 13 -70.0
gain 17 14 -70.0
gain 18 15 -70.0
gain 18 16 -70.0
gain 19 16 -70.0
gain 20 17 -70.0
gain 22 21 -70.0
gain 23 21 -70.0
gain 24 22 -70.0
gain 25 22 -70.0
gain 26 22 -70.0
gain 26 23 -70.0
gain 27 23 -70.0
gain 28 24 -70.0
gain 28 25 -70.0
gain 29 25 -70.0
gain 29 26 -70.0
gain 30 27 -70.0
gain 32 31 -70.0
gain 33 32 -70.0
gain 34 32 -70.0
gain 35 32 -70.0
gain 36 33 -70.0
gain 37 34 -70.0
gain 38 34 -70.0
gain 38 35 -70.0
gain 39 36 -70.0
gain 40 37 -70.0
gain 40 38 -70.0
gain 42 41 -70.0
gain 43 42 -70.0
gain 44 43 -70.0
gain 45 43 -70.0
gain 46 44 -70.0
gain 47 44 -70.0
gain 47 45 -70.0
gain 48 45 -70.0
gain 49 46 -70.0
gain 49 47 -70.0
gain 49 48 -70.0
gain 50 49 -70.0
gain 52 51 -70.0
gain 53 51 -70.0
gain 54 52 -70.0
gain 54 53 -70.0
gain 55 54 -70.0
gain 56 54 -70.0
gain 57 55 -70.0
gain 58 55 -70.0
gain 58 56 -70.0
gain 59 56 -70.0
gain 60 57 -70.0
gain 60 58 -70.0
gain 60 59 -70.0
gain 62 61 -70.0
gain 63 61 -70.0
gain 64 61 -70.0
gain 65 62 -70.0
gain 65 63 -70.0
gain 66 63 -70.0
gain 66 64 -70.0
gain 67 65 -70.0
gain 67 66 -70.0
gain 68 67 -70.0
gain 69 67 -70.0
gain 70 67 -70.0
gain 72 71 -70.0
gain 73 71 -70.0
gain 74 72 -70.0
gain 74 73 -70.0
gain 75 74 -70.0
gain 76 74 -70.0
gain 77 74 -70.0
gain 78 75 -70.0
gain 79 76 -70.0
gain 80 77 -70.0
gain 82 81 -70.0
gain 83 81 -70.0
gain 84 81 -70.0
gain 85 82 -70.0
gain 86 83 -70.0
gain 87 83 -70.0
gain 88 84 -70.0
gain 89 85 -70.0
gain 89 86 -70.0
gain 90 86 -70.0
gain 90 87 -70.0
gain 90 88 -70.0
gain 92 91 -70.0
gain 93 91 -70.0
gain 94 92 -70.0
gain 95 92 -70.0
gain 95 93 -70.0
gain 96 94 -70.0
gain 96 95 -70.0
gain 97 96 -70.0
gain 98 96 -70.0
gain 99 96 -70.0
gain 100 96 -70.0
gain 1 11 -70.0
gain 11 21 -70.0
gain 11 0 -70.0
gain 31 21 -70.0
gain 21 0 -70.0
gain 21 51 -70.0
gain 41 0 -70.0
gain 51 0 -70.0
gain 51 91 -70.0
gain 91 81 -70.0
gain 81 71 -70.0
gain 71 0 -70.0
gain 71 61 -70.0
gain 61 0 -70.0
